# Supplementary material for: RBiomirGS: an all-in-one miRNA gene set analysis solution featuring target mRNA mapping and expression profile integration
Source: PeerJ journal article supplement (doi:10.7717/peerj.4262), 2018-01-12
Supplement: suppl.zip [file gs_results.xlsx]

## Sheet: mirna_mrna_gobp_iwls_GS
GS	converged	loss	gene.tested	coef	std.err	t.value	p.value	adj.p.val
GO_REGULATION_OF_DOPAMINE_METABOLIC_PROCESS	Y	0.00785362	14	0.0625174	0.0499406	1.25183	0.210651	0.472139
GO_LACTATE_TRANSPORT	Y	0.00588429	10	-0.00433612	0.0743345	-0.0583325	0.953485	0.975498
GO_POSITIVE_REGULATION_OF_VIRAL_TRANSCRIPTION	Y	0.0152856	30	-0.0278993	0.0462561	-0.603148	0.54642	0.768589
GO_DETECTION_OF_LIGHT_STIMULUS_INVOLVED_IN_VISUAL_PERCEPTION	Y	0.00689382	12	-0.0408301	0.0764212	-0.534278	0.593158	0.800003
GO_CARDIAC_CHAMBER_DEVELOPMENT	Y	0.0536675	134	0.0536311	0.0168596	3.18104	0.00147068	0.0155524
GO_CALCIUM_ION_TRANSMEMBRANE_IMPORT_INTO_CYTOSOL	Y	0.017017	34	-0.030294	0.0436544	-0.693951	0.487724	0.725131
GO_DNA_DEPENDENT_DNA_REPLICATION_MAINTENANCE_OF_FIDELITY	Y	0.0107319	20	-0.0679157	0.0635295	-1.06904	0.285069	0.558025
GO_TRNA_AMINOACYLATION	Y	0.0176054	36	-0.140891	0.0554663	-2.54012	0.0110921	0.0688154
GO_CIRCADIAN_RHYTHM	Y	0.0494801	122	0.067522	0.0169469	3.98433	6.80139e-05	0.00142554
GO_PHOSPHATIDYLSERINE_ACYL_CHAIN_REMODELING	Y	0.00767868	14	-0.225867	0.102897	-2.19509	0.0281736	0.129027
GO_SPINAL_CORD_DEVELOPMENT	Y	0.0413941	98	0.0585511	0.0192961	3.03435	0.00241495	0.022384
GO_REGULATION_OF_GENE_SILENCING_BY_RNA	Y	0.00918538	17	0.0984836	0.0392348	2.51011	0.0120806	0.0724366
GO_PLATELET_DERIVED_GROWTH_FACTOR_RECEPTOR_SIGNALING_PATHWAY	Y	0.0167266	34	0.0940158	0.028536	3.29463	0.000987944	0.0111305
GO_GLUCURONATE_METABOLIC_PROCESS	Y	0.00534673	9	0.0478609	0.0657023	0.728451	0.46635	0.70959
GO_CELLULAR_RESPONSE_TO_LIPOPROTEIN_PARTICLE_STIMULUS	Y	0.00687914	12	-0.0647855	0.0807288	-0.802507	0.422273	0.676862
GO_REGULATION_OF_NLRP3_INFLAMMASOME_COMPLEX_ASSEMBLY	Y	0.00370378	6	-0.13737	0.135222	-1.01588	0.309702	0.581562
GO_POSITIVE_REGULATION_OF_EPITHELIAL_CELL_DIFFERENTIATION	Y	0.0210018	44	0.0753116	0.0270218	2.78707	0.00532586	0.0410286
GO_CEREBRAL_CORTEX_RADIAL_GLIA_GUIDED_MIGRATION	Y	0.00951581	18	0.122145	0.0372261	3.28117	0.00103631	0.0114809
GO_POSITIVE_REGULATION_OF_KINASE_ACTIVITY	Y	0.13233	413	0.043087	0.0101536	4.24351	2.21464e-05	0.000581106
GO_NEGATIVE_REGULATION_OF_TRANSCRIPTION_FACTOR_IMPORT_INTO_NUCLEUS	Y	0.0170142	34	0.0286845	0.0362295	0.791745	0.428523	0.683082
GO_POTASSIUM_ION_TRANSPORT	Y	0.0539649	134	0.015645	0.0191483	0.817047	0.413916	0.670905
GO_L_PHENYLALANINE_METABOLIC_PROCESS	Y	0.00613758	11	-0.30319	0.124932	-2.42685	0.0152432	0.0848407
GO_REGULATION_OF_T_CELL_RECEPTOR_SIGNALING_PATHWAY	Y	0.0112441	21	0.0063212	0.0496176	0.127398	0.898627	0.955595
GO_CARDIAC_MUSCLE_ADAPTATION	Y	0.00638998	11	0.0309733	0.0630866	0.490965	0.623459	0.820637
GO_NEGATIVE_REGULATION_OF_EPITHELIAL_CELL_PROLIFERATION	Y	0.0406615	96	0.0611723	0.0194435	3.14615	0.0016578	0.0170281
GO_MOVEMENT_IN_ENVIRONMENT_OF_OTHER_ORGANISM_INVOLVED_IN_SYMBIOTIC_INTERACTION	Y	0.0329264	74	0.0254108	0.0248644	1.02198	0.306809	0.577969
GO_REGULATION_OF_PROTEIN_TARGETING_TO_MITOCHONDRION	Y	0.0340787	77	-0.00237358	0.0266867	-0.0889424	0.929129	0.965756
GO_APICAL_PROTEIN_LOCALIZATION	Y	0.00588292	10	-0.0155128	0.0768919	-0.201748	0.840116	0.928897
GO_REGULATION_OF_ESTABLISHMENT_OF_PLANAR_POLARITY	Y	0.0391712	91	0.0155996	0.0231999	0.6724	0.50134	0.735021
GO_FOREBRAIN_NEURON_DEVELOPMENT	Y	0.0145362	29	0.102041	0.02957	3.45082	0.00056053	0.00725067
GO_POSITIVE_REGULATION_OF_PROTEIN_MATURATION	Y	0.00874091	16	-0.148293	0.0889356	-1.66742	0.0954542	0.292395
GO_NEUROMUSCULAR_JUNCTION_DEVELOPMENT	Y	0.0169996	34	0.0367238	0.0352772	1.04101	0.29789	0.571395
GO_MITOTIC_CYTOKINESIS	Y	0.0148534	29	-0.0187218	0.0456717	-0.409922	0.68187	0.85221
GO_NEGATIVE_REGULATION_OF_RESPONSE_TO_ENDOPLASMIC_RETICULUM_STRESS	Y	0.0165906	33	0.0240411	0.0373489	0.643691	0.519786	0.748087
GO_SMAD_PROTEIN_SIGNAL_TRANSDUCTION	Y	0.0216433	45	-0.0079423	0.0354751	-0.223884	0.822851	0.921918
GO_CYTOPLASMIC_TRANSLATION	Y	0.0138734	27	-0.0880877	0.0565803	-1.55686	0.119526	0.336044
GO_MEIOTIC_CHROMOSOME_SEGREGATION	Y	0.0230233	49	-0.106553	0.0437541	-2.43527	0.014893	0.0834906
GO_POSITIVE_REGULATION_OF_CALCIUM_ION_TRANSPORT	Y	0.0365546	84	0.0388866	0.0223755	1.73791	0.0822482	0.264593
GO_REGULATION_OF_DOUBLE_STRAND_BREAK_REPAIR	Y	0.0169699	34	0.0483758	0.0338997	1.42703	0.153594	0.388824
GO_RNA_DEPENDENT_DNA_BIOSYNTHETIC_PROCESS	Y	0.00839088	15	-0.0124614	0.0622522	-0.200176	0.841346	0.928897
GO_REGULATION_OF_B_CELL_RECEPTOR_SIGNALING_PATHWAY	Y	0.00690481	12	-0.0059901	0.0682079	-0.0878212	0.93002	0.965756
GO_REGULATION_OF_G_PROTEIN_COUPLED_RECEPTOR_PROTEIN_SIGNALING_PATHWAY	Y	0.0441185	105	0.016797	0.0215317	0.780103	0.435344	0.690373
GO_DENDRITE_DEVELOPMENT	Y	0.0334045	77	0.0930642	0.0194317	4.78929	1.69085e-06	6.61137e-05
GO_REGULATION_OF_RESPIRATORY_BURST	Y	0.00588371	10	0.0100908	0.0709972	0.14213	0.886979	0.952674
GO_G_PROTEIN_COUPLED_RECEPTOR_INTERNALIZATION	Y	0.00639714	11	0.0106201	0.0675668	0.157179	0.875106	0.946948
GO_MEMORY	Y	0.0371787	87	0.0823731	0.0190934	4.31421	1.61269e-05	0.00044157
GO_NEURON_DEVELOPMENT	Y	0.176824	611	0.0691773	0.00791789	8.73682	2.66644e-18	1.77512e-15
GO_REGULATION_OF_GOLGI_ORGANIZATION	Y	0.00637032	11	0.0544823	0.0578554	0.941697	0.346364	0.609543
GO_ENDOTHELIAL_CELL_DEVELOPMENT	Y	0.0203202	42	0.0505623	0.0302409	1.67198	0.09455	0.290774
GO_POSITIVE_REGULATION_OF_MYOTUBE_DIFFERENTIATION	Y	0.013068	25	0.0198406	0.0435154	0.455944	0.648438	0.833936
GO_REGULATION_OF_CELL_ACTIVATION	Y	0.125067	382	0.0113366	0.011621	0.975524	0.329317	0.600436
GO_MULTICELLULAR_ORGANISM_AGING	Y	0.0139682	27	-0.0163771	0.0469613	-0.348736	0.727293	0.873802
GO_ATP_DEPENDENT_CHROMATIN_REMODELING	Y	0.0272297	59	-0.0134608	0.0315237	-0.427005	0.669382	0.845328
GO_ANATOMICAL_STRUCTURE_FORMATION_INVOLVED_IN_MORPHOGENESIS	Y	0.226282	840	0.0307394	0.00758305	4.0537	5.06863e-05	0.00113502
GO_ION_TRANSPORT	Y	0.260457	1018	-0.0014227	0.00757367	-0.187848	0.850999	0.933741
GO_LIPID_MODIFICATION	Y	0.0696109	183	-0.0150121	0.0180519	-0.831604	0.405647	0.664136
GO_NEGATIVE_REGULATION_OF_KIDNEY_DEVELOPMENT	Y	0.00838681	15	0.0224759	0.0555862	0.404343	0.685966	0.854794
GO_REGULATION_OF_HEPATOCYTE_PROLIFERATION	Y	0.00730984	13	-0.135082	0.0932459	-1.44866	0.147455	0.379658
GO_ACYLGLYCEROL_HOMEOSTASIS	Y	0.00982617	18	0.0276276	0.0501372	0.55104	0.581615	0.793158
GO_NEGATIVE_REGULATION_OF_PHOSPHOPROTEIN_PHOSPHATASE_ACTIVITY	Y	0.0073071	13	0.0874096	0.0461936	1.89225	0.0584788	0.213581
GO_NEGATIVE_REGULATION_OF_PROTEIN_COMPLEX_ASSEMBLY	Y	0.037283	86	0.0383619	0.022128	1.73364	0.0830041	0.26599
GO_HEMOGLOBIN_METABOLIC_PROCESS	Y	0.00424719	7	0.0851685	0.0669942	1.27128	0.20365	0.463592
GO_SINGLE_FERTILIZATION	Y	0.031278	71	-0.140332	0.0418236	-3.35533	0.0007948	0.00950695
GO_LEUKOCYTE_ACTIVATION	Y	0.115206	344	0.0153563	0.0120762	1.27161	0.203532	0.46355
GO_CHROMOSOME_ORGANIZATION	Y	0.215211	784	0.0295945	0.00784705	3.77142	0.00016299	0.0029169
GO_REGULATION_OF_MITOCHONDRIAL_DEPOLARIZATION	Y	0.00740619	13	0.00130288	0.0640576	0.0203392	0.983773	0.990371
GO_NEGATIVE_REGULATION_OF_MAP_KINASE_ACTIVITY	Y	0.0287865	63	0.00437945	0.0288695	0.151698	0.879427	0.947688
GO_SYNAPTIC_VESICLE_LOCALIZATION	Y	0.0395358	92	0.012289	0.0233209	0.526953	0.598234	0.80171
GO_PHENOL_CONTAINING_COMPOUND_METABOLIC_PROCESS	Y	0.0280103	61	0.00967689	0.0288456	0.335472	0.737274	0.878542
GO_REGULATION_OF_ANTIGEN_RECEPTOR_MEDIATED_SIGNALING_PATHWAY	Y	0.0166044	33	0.0027952	0.0400448	0.0698019	0.944352	0.970546
GO_ESTABLISHMENT_OF_SPINDLE_ORIENTATION	Y	0.0125015	24	0.0735572	0.0369773	1.98925	0.0466927	0.183188
GO_METANEPHRIC_NEPHRON_MORPHOGENESIS	Y	0.0107048	20	0.0645436	0.041429	1.55793	0.119272	0.335737
GO_CARBOXYLIC_ACID_BIOSYNTHETIC_PROCESS	Y	0.0785039	213	-0.0436686	0.0181738	-2.40283	0.0162816	0.0894431
GO_GLYCERALDEHYDE_3_PHOSPHATE_METABOLIC_PROCESS	Y	0.00912822	17	-0.201949	0.097584	-2.06949	0.0385189	0.160747
GO_RESPONSE_TO_UV_C	Y	0.00639456	11	-0.0227689	0.0749786	-0.303672	0.761383	0.891148
GO_CARBOHYDRATE_CATABOLIC_PROCESS	Y	0.0372455	86	-0.0545184	0.029405	-1.85405	0.063753	0.226195
GO_DENTATE_GYRUS_DEVELOPMENT	Y	0.00781225	14	0.0813347	0.0461655	1.76181	0.0781238	0.256354
GO_ESTABLISHMENT_OR_MAINTENANCE_OF_TRANSMEMBRANE_ELECTROCHEMICAL_GRADIENT	Y	0.00483383	8	-0.0151861	0.085906	-0.176775	0.859687	0.937722
GO_STRESS_FIBER_ASSEMBLY	Y	0.00724043	13	0.107353	0.0417687	2.57018	0.0101749	0.0653018
GO_LABYRINTHINE_LAYER_DEVELOPMENT	Y	0.0204024	42	0.0152151	0.0341131	0.446019	0.65559	0.838112
GO_N_TERMINAL_PROTEIN_AMINO_ACID_ACETYLATION	Y	0.00624287	11	0.111601	0.0453976	2.45831	0.0139713	0.0802465
GO_NEUROLOGICAL_SYSTEM_PROCESS	Y	0.198174	700	0.0216985	0.00845381	2.56671	0.0102772	0.0655844
GO_NEURONAL_STEM_CELL_DIVISION	Y	0.00677966	12	0.0992558	0.0455218	2.1804	0.0292445	0.132354
GO_CERAMIDE_CATABOLIC_PROCESS	Y	0.00582901	10	-0.112644	0.0992623	-1.13482	0.256472	0.528974
GO_EXCRETION	Y	0.0174552	35	-0.0200773	0.0417996	-0.480323	0.631005	0.82312
GO_DIGESTION	Y	0.0398457	94	-0.0983143	0.0313799	-3.13303	0.00173366	0.017613
GO_POSITIVE_REGULATION_OF_SYNAPTIC_TRANSMISSION_GLUTAMATERGIC	Y	0.00885358	16	0.0436266	0.0500146	0.872277	0.383072	0.646853
GO_POSITIVE_REGULATION_OF_MITOTIC_NUCLEAR_DIVISION	Y	0.0223632	47	0.0501596	0.0286919	1.74821	0.0804492	0.261039
GO_HINDBRAIN_DEVELOPMENT	Y	0.052471	132	0.0824866	0.0154574	5.33638	9.62954e-08	5.3552e-06
GO_OLIGOSACCHARIDE_METABOLIC_PROCESS	Y	0.0265478	58	0.0744266	0.023596	3.1542	0.0016128	0.0167508
GO_NEGATIVE_REGULATION_OF_DENDRITIC_SPINE_DEVELOPMENT	Y	0.00634611	11	0.071549	0.0544404	1.31426	0.188779	0.442286
GO_MODULATION_OF_GROWTH_OF_SYMBIONT_INVOLVED_IN_INTERACTION_WITH_HOST	Y	0.00678492	12	-0.164122	0.0988263	-1.66072	0.0967929	0.294364
GO_CHROMOSOME_SEGREGATION	Y	0.0840327	231	0.000280446	0.015366	0.0182511	0.985439	0.991405
GO_NEGATIVE_REGULATION_OF_CYCLIN_DEPENDENT_PROTEIN_KINASE_ACTIVITY	Y	0.0152625	30	0.0394969	0.0371824	1.06225	0.288142	0.560691
GO_ETHER_METABOLIC_PROCESS	Y	0.00535901	9	0.0263903	0.07081	0.372692	0.709384	0.86748
GO_HEMATOPOIETIC_PROGENITOR_CELL_DIFFERENTIATION	Y	0.0370026	85	0.0161029	0.0239574	0.672146	0.501502	0.735021
GO_CYTOKINE_METABOLIC_PROCESS	Y	0.00740205	13	0.0209743	0.0600508	0.349276	0.726887	0.873802
GO_ANTEROGRADE_AXONAL_TRANSPORT	Y	0.0107555	20	0.0385741	0.0456074	0.845785	0.397687	0.656954
GO_NEGATIVE_REGULATION_OF_ERK1_AND_ERK2_CASCADE	Y	0.0224305	47	0.0293669	0.0308024	0.953394	0.340407	0.607041
GO_STEROID_BIOSYNTHETIC_PROCESS	Y	0.0347639	79	-0.0348796	0.029039	-1.20113	0.229721	0.495915
GO_ALDITOL_PHOSPHATE_METABOLIC_PROCESS	Y	0.0147137	29	-0.106269	0.0578247	-1.83778	0.0661157	0.230439
GO_SODIUM_INDEPENDENT_ORGANIC_ANION_TRANSPORT	Y	0.00676318	12	0.104217	0.0455362	2.28865	0.0221144	0.109934
GO_REGULATION_OF_PROTEIN_TYROSINE_KINASE_ACTIVITY	Y	0.0264167	57	0.0294192	0.0279465	1.0527	0.292498	0.565431
GO_REGULATION_OF_INTERFERON_BETA_PRODUCTION	Y	0.0178757	36	0.0234565	0.035919	0.653039	0.513742	0.743759
GO_NUCLEOSOME_DISASSEMBLY	Y	0.00839193	15	0.00636985	0.0586796	0.108553	0.913559	0.958896
GO_DNA_TEMPLATED_TRANSCRIPTION_ELONGATION	Y	0.0336606	76	-0.0326272	0.0294395	-1.10828	0.267759	0.540935
GO_N_GLYCAN_PROCESSING	Y	0.00930353	18	0.147372	0.0315552	4.67028	3.03576e-06	0.000108657
GO_INORGANIC_ION_IMPORT_INTO_CELL	Y	0.00740455	13	0.0134607	0.0615977	0.218525	0.827023	0.923259
GO_ENDOPLASMIC_RETICULUM_TO_CYTOSOL_TRANSPORT	Y	0.0112446	21	0.00146592	0.0503885	0.0290923	0.976791	0.988046
GO_NEGATIVE_REGULATION_OF_REPRODUCTIVE_PROCESS	Y	0.0207436	43	0.0474998	0.0303469	1.56522	0.117553	0.331499
GO_G_PROTEIN_COUPLED_PURINERGIC_RECEPTOR_SIGNALING_PATHWAY	Y	0.00876231	16	-0.133047	0.0819906	-1.62271	0.104673	0.309235
GO_MEMBRANE_DEPOLARIZATION	Y	0.0239998	52	0.0944145	0.0231223	4.08327	4.46532e-05	0.00105468
GO_OLFACTORY_BULB_INTERNEURON_DIFFERENTIATION	Y	0.00833385	15	0.0659748	0.0474717	1.38977	0.16462	0.406355
GO_POSITIVE_REGULATION_OF_G_PROTEIN_COUPLED_RECEPTOR_PROTEIN_SIGNALING_PATHWAY	Y	0.00932926	17	0.0465917	0.0484422	0.961801	0.336166	0.604866
GO_ATTACHMENT_OF_SPINDLE_MICROTUBULES_TO_KINETOCHORE	Y	0.00789449	14	0.0265376	0.0567918	0.467279	0.640308	0.829441
GO_VIRAL_BUDDING	Y	0.010763	20	-0.0372561	0.0580064	-0.642275	0.520705	0.748259
GO_REGULATION_OF_LYASE_ACTIVITY	Y	0.031077	69	0.00784163	0.0272908	0.287336	0.773859	0.89694
GO_RESPONSE_TO_NITROGEN_COMPOUND	Y	0.204418	730	0.0219191	0.00828341	2.64615	0.00815045	0.0552024
GO_NEGATIVE_REGULATION_OF_TRANSMEMBRANE_TRANSPORT	Y	0.0295109	65	0.0303043	0.0261259	1.15993	0.246095	0.518505
GO_REGULATION_OF_DNA_RECOMBINATION	Y	0.0232682	49	0.00887416	0.0322524	0.275147	0.783207	0.901153
GO_REGULATION_OF_LEUKOCYTE_PROLIFERATION	Y	0.0636758	164	0.0137781	0.0174374	0.790148	0.429455	0.684099
GO_RESPONSE_TO_ETHANOL	Y	0.0465594	112	-0.00812318	0.0225503	-0.360225	0.718684	0.870843
GO_SULFUR_COMPOUND_METABOLIC_PROCESS	Y	0.0993928	286	-0.0393824	0.0155261	-2.53652	0.0112068	0.0692501
GO_POSITIVE_REGULATION_OF_TYROSINE_PHOSPHORYLATION_OF_STAT1_PROTEIN	Y	0.0058801	10	0.0242052	0.0678596	0.356695	0.721326	0.871773
GO_REGULATION_OF_CELL_CYCLE_CHECKPOINT	Y	0.0134707	26	-0.0637518	0.0545471	-1.16875	0.242526	0.514034
GO_NEGATIVE_REGULATION_OF_TRANSCRIPTION_REGULATORY_REGION_DNA_BINDING	Y	0.00738837	13	0.0414838	0.0560361	0.740306	0.459127	0.706927
GO_POSITIVE_REGULATION_OF_DNA_REPLICATION	Y	0.0321081	72	0.0425676	0.0238649	1.78369	0.0744956	0.248015
GO_MYELINATION_IN_PERIPHERAL_NERVOUS_SYSTEM	Y	0.00963503	18	0.102044	0.0374277	2.72643	0.00641036	0.0463158
GO_NEGATIVE_REGULATION_OF_NEURON_APOPTOTIC_PROCESS	Y	0.0494132	121	0.0476308	0.0181657	2.62201	0.00875063	0.0582499
GO_POSITIVE_REGULATION_OF_REPRODUCTIVE_PROCESS	Y	0.0204089	42	0.0036279	0.0354145	0.102441	0.918408	0.960736
GO_POSITIVE_REGULATION_OF_METANEPHROS_DEVELOPMENT	Y	0.00787333	14	0.049583	0.0523621	0.946927	0.343693	0.60822
GO_POSITIVE_REGULATION_OF_LYMPHOCYTE_APOPTOTIC_PROCESS	Y	0.00687679	12	-0.0680674	0.0813136	-0.837098	0.402552	0.660463
GO_NUCLEOTIDE_PHOSPHORYLATION	Y	0.0223038	47	-0.0833611	0.042721	-1.95129	0.0510423	0.194195
GO_POSITIVE_REGULATION_OF_GENE_EXPRESSION_EPIGENETIC	Y	0.02527	54	0.00263792	0.0313446	0.0841589	0.932931	0.966394
GO_GLUTAMATE_SECRETION	Y	0.0143615	28	0.0492008	0.0370507	1.32793	0.184223	0.436113
GO_REGULATION_OF_MRNA_METABOLIC_PROCESS	Y	0.0428101	103	0.0804245	0.017589	4.57244	4.86204e-06	0.000161593
GO_POSITIVE_REGULATION_OF_PROTEIN_BINDING	Y	0.0302023	67	0.0465419	0.0242766	1.91715	0.0552393	0.205623
GO_REGULATION_OF_NFAT_PROTEIN_IMPORT_INTO_NUCLEUS	Y	0.0078082	14	0.0828362	0.046364	1.78665	0.0740158	0.247062
GO_REGULATION_OF_VASCULOGENESIS	Y	0.00740379	13	0.0161598	0.0610551	0.264676	0.791263	0.905427
GO_POSITIVE_REGULATION_OF_PURINE_NUCLEOTIDE_METABOLIC_PROCESS	Y	0.044094	105	0.0243125	0.0210157	1.15687	0.247345	0.518888
GO_LENS_FIBER_CELL_DIFFERENTIATION	Y	0.0111771	21	0.0607344	0.0414401	1.4656	0.142781	0.372399
GO_SENSORY_PERCEPTION	Y	0.138578	436	-0.0106848	0.0116402	-0.917925	0.358674	0.621084
GO_HEPATICOBILIARY_SYSTEM_DEVELOPMENT	Y	0.0461069	111	0.0363115	0.0196444	1.84844	0.0645592	0.227744
GO_FATTY_ACID_CATABOLIC_PROCESS	Y	0.0261905	57	-0.10096	0.0403159	-2.50421	0.0122838	0.0731837
GO_REGULATION_OF_VESICLE_FUSION	Y	0.0239068	51	0.0614512	0.02637	2.33034	0.0198023	0.101336
GO_MITOCHONDRIAL_RESPIRATORY_CHAIN_COMPLEX_I_BIOGENESIS	Y	0.013653	27	-0.183685	0.0685662	-2.67894	0.0073942	0.0515048
GO_NEGATIVE_REGULATION_OF_CELLULAR_RESPONSE_TO_TRANSFORMING_GROWTH_FACTOR_BETA_STIMULUS	Y	0.0272489	60	0.0810262	0.0226969	3.56993	0.000358278	0.00517723
GO_REGULATION_OF_LIPID_STORAGE	Y	0.017888	36	0.00960685	0.0375187	0.256055	0.797912	0.908636
GO_CARBOHYDRATE_TRANSPORT	Y	0.0351692	80	0.0180611	0.0245272	0.736371	0.461517	0.708726
GO_REGULATION_OF_CELLULAR_RESPONSE_TO_GROWTH_FACTOR_STIMULUS	Y	0.0759766	206	0.0612715	0.0133584	4.58674	4.54128e-06	0.000152018
GO_EMBRYONIC_HEMOPOIESIS	Y	0.00900778	17	0.129167	0.0351713	3.67252	0.000241063	0.00396348
GO_EMBRYO_DEVELOPMENT_ENDING_IN_BIRTH_OR_EGG_HATCHING	Y	0.152209	494	0.0316529	0.00966393	3.27536	0.00105782	0.0116913
GO_ANTIGEN_PROCESSING_AND_PRESENTATION_OF_PEPTIDE_OR_POLYSACCHARIDE_ANTIGEN_VIA_MHC_CLASS_II	Y	0.0351762	80	-0.0153147	0.0272383	-0.562247	0.573957	0.787581
GO_RESPONSE_TO_IONIZING_RADIATION	Y	0.0506297	124	0.0147402	0.0199608	0.738457	0.460249	0.707382
GO_PROTEIN_EXPORT_FROM_NUCLEUS	Y	0.0133977	26	0.0728403	0.0351331	2.07327	0.0381656	0.159986
GO_EPITHELIUM_DEVELOPMENT	Y	0.219815	808	0.0346166	0.00763627	4.53319	5.8582e-06	0.000187988
GO_POSITIVE_REGULATION_OF_SEQUESTERING_OF_CALCIUM_ION	Y	0.00585997	10	0.053776	0.0607073	0.885823	0.375728	0.639686
GO_SECONDARY_METABOLITE_BIOSYNTHETIC_PROCESS	Y	0.00874681	16	-0.144146	0.0865218	-1.666	0.0957351	0.293063
GO_CELL_MIGRATION_INVOLVED_IN_HEART_DEVELOPMENT	Y	0.00740282	13	-0.0206816	0.0684788	-0.302015	0.762645	0.891829
GO_PROTEIN_LOCALIZATION_TO_CYTOSKELETON	Y	0.0134883	26	0.0421791	0.0395781	1.06572	0.28657	0.559893
GO_NUCLEAR_ENVELOPE_REASSEMBLY	Y	0.00787016	14	0.0519735	0.051911	1.0012	0.316745	0.587177
GO_INTRINSIC_APOPTOTIC_SIGNALING_PATHWAY_IN_RESPONSE_TO_DNA_DAMAGE_BY_P53_CLASS_MEDIATOR	Y	0.0135231	26	-0.0116842	0.0471888	-0.247606	0.804443	0.910945
GO_REGULATION_OF_AUTOPHAGY	Y	0.0810977	221	-0.00256155	0.0158411	-0.161702	0.871543	0.944848
GO_PHOSPHOLIPID_METABOLIC_PROCESS	Y	0.106199	310	-0.00138908	0.0133699	-0.103896	0.917253	0.959852
GO_AMMONIUM_ION_METABOLIC_PROCESS	Y	0.0543184	135	0.00213218	0.0199153	0.107063	0.914741	0.959098
GO_REGULATION_OF_INTERLEUKIN_4_PRODUCTION	Y	0.0135181	26	0.019629	0.0426642	0.460082	0.645465	0.831954
GO_NCRNA_CATABOLIC_PROCESS	Y	0.00934417	17	0.0340731	0.0503558	0.676648	0.49864	0.733416
GO_REGULATION_OF_FAT_CELL_DIFFERENTIATION	Y	0.0404102	95	0.0512925	0.020234	2.53497	0.0112566	0.0693733
GO_GLUTAMINE_FAMILY_AMINO_ACID_BIOSYNTHETIC_PROCESS	Y	0.00835008	15	-0.07539	0.0749292	-1.00615	0.314361	0.585324
GO_REGULATION_OF_PROTEIN_ACTIVATION_CASCADE	Y	0.0138675	27	-0.0911602	0.0572807	-1.59146	0.111528	0.320499
GO_REGULATION_OF_TELOMERASE_RNA_LOCALIZATION_TO_CAJAL_BODY	Y	0.00503669	9	-0.430171	0.154764	-2.77952	0.00545117	0.0416384
GO_REGULATION_OF_RNA_STABILITY	Y	0.0458076	110	0.0286057	0.0202746	1.41091	0.158292	0.396626
GO_BUNDLE_OF_HIS_CELL_TO_PURKINJE_MYOCYTE_COMMUNICATION	Y	0.00638714	11	-0.0419702	0.0792216	-0.529783	0.596271	0.80171
GO_REGULATION_OF_CELL_MATURATION	Y	0.00932934	17	-0.0578334	0.0669509	-0.863818	0.387702	0.649774
GO_NEGATIVE_REGULATION_OF_CELL_DEVELOPMENT	Y	0.0951967	272	0.0501477	0.0121474	4.12827	3.67626e-05	0.000905059
GO_MAMMARY_GLAND_MORPHOGENESIS	Y	0.0174589	35	0.0140746	0.037491	0.375413	0.707359	0.86661
GO_CELLULAR_PROTEIN_COMPLEX_DISASSEMBLY	Y	0.0376519	88	-0.10808	0.0333236	-3.24336	0.00118406	0.0129329
GO_REGULATION_OF_CYTOKINE_PRODUCTION_INVOLVED_IN_INFLAMMATORY_RESPONSE	Y	0.00736935	13	-0.0756594	0.0798055	-0.948047	0.343122	0.607973
GO_URETER_DEVELOPMENT	Y	0.00531386	9	0.0765287	0.0582292	1.31427	0.188778	0.442286
GO_NEGATIVE_REGULATION_OF_PROTEIN_PROCESSING	Y	0.0148429	29	0.0278302	0.0393627	0.707019	0.479566	0.719349
GO_BODY_MORPHOGENESIS	Y	0.0195138	40	0.0442522	0.0316923	1.39631	0.162644	0.404048
GO_SOMATIC_STEM_CELL_POPULATION_MAINTENANCE	Y	0.0267891	58	0.0355273	0.027201	1.30611	0.191538	0.446076
GO_CYTOPLASMIC_MICROTUBULE_ORGANIZATION	Y	0.019085	39	0.047813	0.0319413	1.4969	0.134441	0.360752
GO_POSITIVE_REGULATION_OF_DNA_DAMAGE_RESPONSE_SIGNAL_TRANSDUCTION_BY_P53_CLASS_MEDIATOR	Y	0.00532651	9	0.0675884	0.0610149	1.10774	0.267995	0.540935
GO_PROTEIN_ACTIVATION_CASCADE	Y	0.0237431	51	-0.124515	0.0452842	-2.74964	0.0059738	0.044191
GO_POSITIVE_REGULATION_OF_PHOSPHOLIPASE_ACTIVITY	Y	0.0224265	47	0.0311348	0.030573	1.01838	0.308517	0.580716
GO_NEGATIVE_REGULATION_OF_PEPTIDYL_TYROSINE_PHOSPHORYLATION	Y	0.0170281	34	-0.0185133	0.0421365	-0.439366	0.660403	0.840207
GO_REGULATION_OF_COLLATERAL_SPROUTING	Y	0.00920072	17	0.0949144	0.0408965	2.32085	0.0203095	0.102606
GO_ESTABLISHMENT_OR_MAINTENANCE_OF_MONOPOLAR_CELL_POLARITY	Y	0.00740554	13	0.0086402	0.0625685	0.138092	0.89017	0.952674
GO_NEURON_RECOGNITION	Y	0.0159334	32	0.0867424	0.0298327	2.90763	0.0036475	0.0312362
GO_NUCLEOSIDE_DIPHOSPHATE_METABOLIC_PROCESS	Y	0.031811	71	-0.0240612	0.0296768	-0.810776	0.417508	0.67477
GO_MICROTUBULE_POLYMERIZATION_OR_DEPOLYMERIZATION	Y	0.0187127	38	0.0293292	0.0342318	0.856782	0.39158	0.653288
GO_RESPONSE_TO_AMMONIUM_ION	Y	0.0228121	48	0.0381196	0.0296165	1.28711	0.198079	0.455816
GO_REGULATION_OF_INTERLEUKIN_5_PRODUCTION	Y	0.00838993	15	0.0150885	0.0570322	0.264561	0.791352	0.905427
GO_REGULATION_OF_GLUCOSE_IMPORT	Y	0.0246636	53	0.0665299	0.0254992	2.6091	0.00908779	0.0601501
GO_NEGATIVE_REGULATION_OF_PROTEOLYSIS	Y	0.089216	249	-0.0112296	0.0153329	-0.732386	0.463945	0.70959
GO_PINOCYTOSIS	Y	0.00680081	12	-0.149568	0.0985867	-1.51712	0.129258	0.352956
GO_REGULATION_OF_EPITHELIAL_CELL_APOPTOTIC_PROCESS	Y	0.0235766	50	0.0485848	0.0279307	1.73948	0.0819726	0.264353
GO_PHOSPHATIDYLETHANOLAMINE_METABOLIC_PROCESS	Y	0.00838561	15	0.0246584	0.0551767	0.446898	0.654956	0.837688
GO_PHOSPHATIDYLCHOLINE_METABOLIC_PROCESS	Y	0.0240542	51	-0.0260349	0.0352022	-0.739582	0.459566	0.706927
GO_LUNG_EPITHELIUM_DEVELOPMENT	Y	0.0148171	30	0.117686	0.028303	4.15809	3.22831e-05	0.000807598
GO_METENCEPHALON_DEVELOPMENT	Y	0.0399799	95	0.0834846	0.0179569	4.64916	3.36337e-06	0.000116789
GO_G_PROTEIN_COUPLED_PURINERGIC_NUCLEOTIDE_RECEPTOR_SIGNALING_PATHWAY	Y	0.00585498	10	-0.0773136	0.0909171	-0.850375	0.395131	0.655224
GO_ACTIN_FILAMENT_BUNDLE_ORGANIZATION	Y	0.0211947	44	0.0343997	0.0312102	1.1022	0.270395	0.543242
GO_CELLULAR_RESPONSE_TO_VIRUS	Y	0.0088774	16	-0.0082408	0.0595039	-0.138492	0.889854	0.952674
GO_CYTOPLASMIC_MRNA_PROCESSING_BODY_ASSEMBLY	Y	0.00688977	12	0.0401374	0.0586315	0.68457	0.493627	0.731203
GO_RESPIRATORY_GASEOUS_EXCHANGE	Y	0.0203469	42	0.0430617	0.0310275	1.38786	0.165203	0.406929
GO_NEGATIVE_REGULATION_OF_PROTEIN_MODIFICATION_BY_SMALL_PROTEIN_CONJUGATION_OR_REMOVAL	Y	0.0437801	104	-0.0125588	0.0237087	-0.52971	0.596321	0.80171
GO_AMINO_ACID_ACTIVATION	Y	0.0176054	36	-0.140891	0.0554663	-2.54012	0.0110921	0.0688154
GO_DENDRITIC_CELL_DIFFERENTIATION	Y	0.0135247	26	0.00569745	0.0446885	0.127492	0.898552	0.955595
GO_NATURAL_KILLER_CELL_DIFFERENTIATION	Y	0.00639738	11	-0.00941239	0.0719929	-0.130741	0.895982	0.954605
GO_BONE_TRABECULA_MORPHOGENESIS	Y	0.00631023	11	-0.141568	0.101898	-1.38931	0.16476	0.406483
GO_REGULATION_OF_INFLAMMATORY_RESPONSE_TO_ANTIGENIC_STIMULUS	Y	0.00831707	15	-0.106054	0.0789918	-1.3426	0.179424	0.427914
GO_REGULATION_OF_PROTEASOMAL_UBIQUITIN_DEPENDENT_PROTEIN_CATABOLIC_PROCESS	Y	0.0535611	133	0.0309067	0.0182802	1.69072	0.0909134	0.283643
GO_NEGATIVE_REGULATION_OF_NEURON_DIFFERENTIATION	Y	0.0674509	177	0.0478279	0.0150641	3.17495	0.00150184	0.0158205
GO_REGULATION_OF_SKELETAL_MUSCLE_TISSUE_DEVELOPMENT	Y	0.0215722	45	0.0448195	0.0297961	1.50421	0.132551	0.357541
GO_MUSCLE_TISSUE_DEVELOPMENT	Y	0.0877669	246	0.0547936	0.0125404	4.36937	1.25503e-05	0.000360473
GO_NEGATIVE_REGULATION_OF_PROTEIN_AUTOPHOSPHORYLATION	Y	0.00588303	10	-0.0148925	0.0767478	-0.194044	0.846144	0.930294
GO_ACID_SECRETION	Y	0.0260547	56	0.0121479	0.0298598	0.406832	0.684137	0.853658
GO_POSITIVE_REGULATION_OF_ADAPTIVE_IMMUNE_RESPONSE	Y	0.0287295	63	-0.0404055	0.03298	-1.22515	0.220538	0.484564
GO_REGULATION_OF_OSTEOCLAST_DIFFERENTIATION	Y	0.0256128	55	0.0354112	0.0279081	1.26885	0.204515	0.464942
GO_REGULATION_OF_PROTEIN_BINDING	Y	0.0599992	153	0.0397418	0.0165718	2.39816	0.0164905	0.0899532
GO_CARDIAC_SEPTUM_DEVELOPMENT	Y	0.0364553	84	0.0532032	0.0212196	2.50727	0.012178	0.0727398
GO_REGULATION_OF_ICOSANOID_SECRETION	Y	0.00879209	16	0.075634	0.0440673	1.71633	0.0861235	0.273538
GO_L_ALPHA_AMINO_ACID_TRANSMEMBRANE_TRANSPORT	Y	0.015221	30	0.0554493	0.0349406	1.58696	0.112545	0.322062
GO_REGULATION_OF_HISTONE_METHYLATION	Y	0.0247676	53	0.049183	0.0271966	1.80843	0.0705614	0.239651
GO_POSITIVE_REGULATION_OF_MITOCHONDRIAL_FISSION	Y	0.00790131	14	-0.00763675	0.0634714	-0.120318	0.904233	0.956438
GO_POSITIVE_REGULATION_OF_NUCLEAR_TRANSCRIBED_MRNA_CATABOLIC_PROCESS_DEADENYLATION_DEPENDENT_DECAY	Y	0.00645687	12	0.159832	0.0369776	4.32241	1.55403e-05	0.000430409
GO_ANTIMICROBIAL_HUMORAL_RESPONSE	Y	0.0116283	22	-0.0866614	0.0630575	-1.37432	0.169363	0.413891
GO_EPIDERMIS_MORPHOGENESIS	Y	0.0134549	26	0.0563232	0.0373119	1.50952	0.131188	0.356135
GO_INTERMEDIATE_FILAMENT_BASED_PROCESS	Y	0.0157339	31	-0.0120771	0.0432762	-0.279069	0.780196	0.899468
GO_COGNITION	Y	0.0789046	217	0.0722331	0.0126451	5.71234	1.13701e-08	7.66738e-07
GO_RESPONSE_TO_ZINC_ION	Y	0.0187327	38	0.0132404	0.0361079	0.366689	0.713857	0.869393
GO_PURINE_DEOXYRIBONUCLEOTIDE_METABOLIC_PROCESS	Y	0.0073523	13	-0.0945476	0.0822734	-1.14919	0.250498	0.522216
GO_DISRUPTION_OF_CELLS_OF_OTHER_ORGANISM	Y	0.00481596	8	0.0531173	0.0689359	0.770531	0.440998	0.69398
GO_AXIS_SPECIFICATION	Y	0.0344411	78	0.0124565	0.0252994	0.492364	0.622469	0.820264
GO_PHOSPHATIDYLINOSITOL_METABOLIC_PROCESS	Y	0.0649546	168	-0.00735054	0.0184029	-0.399423	0.689588	0.856913
GO_CELL_PART_MORPHOGENESIS	Y	0.163521	547	0.0559455	0.00861511	6.49388	8.64751e-11	9.35741e-09
GO_PIGMENT_GRANULE_LOCALIZATION	Y	0.0126147	24	-0.0225605	0.0507213	-0.444794	0.656476	0.838152
GO_PROSTAGLANDIN_BIOSYNTHETIC_PROCESS	Y	0.00877932	16	-0.120433	0.0790721	-1.52307	0.127763	0.3499
GO_VASCULAR_ENDOTHELIAL_GROWTH_FACTOR_SIGNALING_PATHWAY	Y	0.00780473	14	0.0840908	0.0459723	1.82916	0.0673969	0.232812
GO_RESPONSE_TO_ORGANOPHOSPHORUS	Y	0.0486171	118	0.00179285	0.0213108	0.0841287	0.932955	0.966394
GO_AXO_DENDRITIC_TRANSPORT	Y	0.0140338	28	0.110613	0.0299942	3.68782	0.000227038	0.0037864
GO_SINGLE_ORGANISM_MEMBRANE_FUSION	Y	0.0444876	106	-0.00182175	0.0227291	-0.0801504	0.936119	0.967166
GO_REGULATION_OF_PROTEIN_UBIQUITINATION_INVOLVED_IN_UBIQUITIN_DEPENDENT_PROTEIN_CATABOLIC_PROCESS	Y	0.0332524	75	-0.0446249	0.030628	-1.457	0.14514	0.375791
GO_SUBSTRATE_INDEPENDENT_TELENCEPHALIC_TANGENTIAL_INTERNEURON_MIGRATION	Y	0.00688722	12	0.043056	0.0580097	0.742221	0.457966	0.706633
GO_SKELETAL_MUSCLE_TISSUE_REGENERATION	Y	0.0121384	23	0.03912	0.0426054	0.918195	0.358533	0.621084
GO_POLYSACCHARIDE_BIOSYNTHETIC_PROCESS	Y	0.0165966	33	-0.0199328	0.0429395	-0.464206	0.642507	0.83044
GO_REGULATION_OF_TYROSINE_PHOSPHORYLATION_OF_STAT_PROTEIN	Y	0.0260586	56	0.00706704	0.0303538	0.232822	0.815903	0.919224
GO_ORGAN_REGENERATION	Y	0.0322004	72	0.0151165	0.0260944	0.579301	0.562395	0.782056
GO_GLAND_MORPHOGENESIS	Y	0.037139	86	0.0575573	0.0206669	2.785	0.00535997	0.041155
GO_NEGATIVE_REGULATION_OF_ADAPTIVE_IMMUNE_RESPONSE	Y	0.0144149	28	0.0115134	0.0422595	0.272446	0.785283	0.902426
GO_REGULATION_OF_SYSTEMIC_ARTERIAL_BLOOD_PRESSURE_BY_CIRCULATORY_RENIN_ANGIOTENSIN	Y	0.00740219	13	-0.0226043	0.0688964	-0.328091	0.742848	0.882203
GO_RIBOSOME_BIOGENESIS	Y	0.071192	190	-0.0805506	0.0212834	-3.78467	0.000154556	0.00280917
GO_B_CELL_HOMEOSTASIS	Y	0.00926493	18	0.151133	0.0325426	4.64415	3.44577e-06	0.000118764
GO_IRE1_MEDIATED_UNFOLDED_PROTEIN_RESPONSE	Y	0.0228641	48	0.00888482	0.032582	0.272691	0.785095	0.902426
GO_SINGLE_ORGANISM_BEHAVIOR	Y	0.112638	340	0.0726092	0.0102241	7.1018	1.29076e-12	1.93738e-10
GO_POSITIVE_REGULATION_OF_CALCIUM_ION_DEPENDENT_EXOCYTOSIS	Y	0.011242	21	0.0134857	0.0484813	0.278162	0.780892	0.899825
GO_POSITIVE_REGULATION_OF_ENDOCYTOSIS	Y	0.0405108	95	0.037869	0.0211009	1.79466	0.0727292	0.24436
GO_MRNA_SPLICE_SITE_SELECTION	Y	0.0129533	25	0.0726143	0.0356351	2.03772	0.0415968	0.170229
GO_REGULATION_OF_TRANSLATION_IN_RESPONSE_TO_STRESS	Y	0.00934149	17	-0.0434431	0.0638027	-0.680897	0.495948	0.731694
GO_NEGATIVE_REGULATION_OF_GENE_EXPRESSION	Y	0.295487	1232	0.0503673	0.00613597	8.20853	2.43326e-16	6.65999e-14
GO_MULTI_ORGANISM_TRANSPORT	Y	0.0227769	48	0.0478221	0.0284958	1.67822	0.093327	0.288859
GO_PHENOL_CONTAINING_COMPOUND_BIOSYNTHETIC_PROCESS	Y	0.0139294	27	-0.0548155	0.0526712	-1.04071	0.298028	0.571395
GO_POSITIVE_REGULATION_OF_ERYTHROCYTE_DIFFERENTIATION	Y	0.0107651	20	0.0301803	0.0470143	0.641939	0.520923	0.748259
GO_DENDRITIC_CELL_MIGRATION	Y	0.00838436	15	-0.0301267	0.0655524	-0.459582	0.645824	0.831954
GO_SENSORY_PERCEPTION_OF_TEMPERATURE_STIMULUS	Y	0.00934764	17	-0.0345894	0.0624997	-0.553434	0.579975	0.792361
GO_LYSOSOMAL_TRANSPORT	Y	0.0279903	61	0.0231816	0.0275879	0.840282	0.400765	0.65998
GO_CELLULAR_CATABOLIC_PROCESS	Y	0.260822	1020	-0.000746795	0.00755299	-0.098874	0.92124	0.962056
GO_POSITIVE_REGULATION_OF_DNA_BIOSYNTHETIC_PROCESS	Y	0.0244382	52	0.0304605	0.0291486	1.04501	0.296037	0.57053
GO_POSITIVE_REGULATION_OF_MACROPHAGE_ACTIVATION	Y	0.00636815	11	0.0563259	0.0570419	0.987448	0.32344	0.592974
GO_EXTRACELLULAR_NEGATIVE_REGULATION_OF_SIGNAL_TRANSDUCTION	Y	0.00779572	14	-0.137004	0.0858145	-1.59651	0.110397	0.318271
GO_REGULATION_OF_CALCIUM_MEDIATED_SIGNALING	Y	0.0278498	61	0.0563196	0.0248238	2.26878	0.0232971	0.113867
GO_REGULATION_OF_ALPHA_BETA_T_CELL_ACTIVATION	Y	0.0259787	56	0.0427797	0.0268646	1.59242	0.111314	0.320112
GO_MUSCLE_ORGAN_DEVELOPMENT	Y	0.0894197	251	0.0443399	0.0128669	3.44604	0.000570531	0.00727558
GO_POSITIVE_REGULATION_OF_HEMOPOIESIS	Y	0.055467	139	0.0396185	0.0173869	2.27864	0.0227036	0.111906
GO_OUTFLOW_TRACT_SEPTUM_MORPHOGENESIS	Y	0.00789605	14	0.0237013	0.0573693	0.413135	0.679514	0.850855
GO_REGULATION_OF_MAMMARY_GLAND_EPITHELIAL_CELL_PROLIFERATION	Y	0.00738449	13	0.0453606	0.0552062	0.821657	0.411286	0.668663
GO_REGULATION_OF_PHOSPHATIDYLINOSITOL_3_KINASE_ACTIVITY	Y	0.0182491	37	0.0466904	0.0325773	1.43322	0.151817	0.385547
GO_CELLULAR_RESPONSE_TO_EPIDERMAL_GROWTH_FACTOR_STIMULUS	Y	0.0125881	24	0.0421261	0.0410716	1.02568	0.305062	0.577447
GO_LEUKOCYTE_DEGRANULATION	Y	0.0134206	26	-0.0929336	0.058257	-1.59523	0.110683	0.318692
GO_MYELOID_CELL_HOMEOSTASIS	Y	0.0320975	72	0.0444958	0.0236475	1.88163	0.0599066	0.216249
GO_CELLULAR_GLUCAN_METABOLIC_PROCESS	Y	0.0199937	41	-0.00310913	0.0366098	-0.0849261	0.932321	0.966394
GO_REGULATION_OF_BLOOD_PRESSURE	Y	0.0552638	138	-0.0232129	0.0212656	-1.09157	0.275041	0.54855
GO_REGULATION_OF_MORPHOGENESIS_OF_A_BRANCHING_STRUCTURE	Y	0.0236619	50	0.0180245	0.0309769	0.581868	0.560665	0.781538
GO_RESPONSE_TO_ELECTRICAL_STIMULUS	Y	0.0173038	35	0.0707117	0.0313305	2.25697	0.0240256	0.11657
GO_NEGATIVE_REGULATION_OF_TELOMERE_MAINTENANCE_VIA_TELOMERASE	Y	0.00588408	10	0.00700268	0.0717043	0.0976605	0.922203	0.962326
GO_REGULATION_OF_T_CELL_CHEMOTAXIS	Y	0.00530678	9	0.0808936	0.0574445	1.4082	0.159093	0.397724
GO_REGULATION_OF_ESTABLISHMENT_OF_PLANAR_POLARITY_INVOLVED_IN_NEURAL_TUBE_CLOSURE	Y	0.00789766	14	-0.0221899	0.0662651	-0.334865	0.737732	0.878542
GO_REGULATION_OF_CYTOKINE_PRODUCTION	Y	0.14274	453	-0.0075714	0.0113216	-0.668755	0.503663	0.736981
GO_REGULATION_OF_ERBB_SIGNALING_PATHWAY	Y	0.0336876	76	0.0190971	0.0250883	0.761194	0.446554	0.697956
GO_REGULATION_OF_CHOLESTEROL_HOMEOSTASIS	Y	0.00585991	10	0.0538346	0.0617121	0.87235	0.383032	0.646853
GO_VENTRICULAR_SEPTUM_MORPHOGENESIS	Y	0.0143259	28	0.0611662	0.0356529	1.7156	0.086257	0.273775
GO_POSITIVE_REGULATION_OF_ENDOTHELIAL_CELL_CHEMOTAXIS	Y	0.00586733	10	0.0458216	0.0628089	0.729541	0.465683	0.70959
GO_POSITIVE_REGULATION_OF_ENDOTHELIAL_CELL_DIFFERENTIATION	Y	0.00536341	9	0.0066046	0.0756714	0.0872799	0.93045	0.965756
GO_NEGATIVE_REGULATION_OF_SMOOTH_MUSCLE_CELL_PROLIFERATION	Y	0.017459	35	-0.014749	0.0410408	-0.359374	0.719321	0.871068
GO_TOLERANCE_INDUCTION	Y	0.00588335	10	0.0123631	0.0704732	0.17543	0.860744	0.938389
GO_CHEMICAL_HOMEOSTASIS	Y	0.203203	723	0.00264212	0.00878635	0.300707	0.763642	0.892322
GO_SYNAPSE_ORGANIZATION	Y	0.0522547	130	0.0602258	0.0167238	3.60121	0.00031783	0.00483289
GO_METANEPHROS_DEVELOPMENT	Y	0.0328325	74	0.0464202	0.0231176	2.00801	0.0446618	0.178487
GO_REGULATION_OF_MICROTUBULE_BASED_PROCESS	Y	0.0787153	213	0.00931391	0.0155505	0.598947	0.549218	0.771591
GO_NEGATIVE_REGULATION_OF_TRANSPORTER_ACTIVITY	Y	0.023198	49	0.0430994	0.0287906	1.497	0.134417	0.360752
GO_ENDOSOME_ORGANIZATION	Y	0.0252507	54	0.0222595	0.0294027	0.757055	0.44903	0.699274
GO_REGULATION_OF_WOUND_HEALING	Y	0.0454907	109	0.022019	0.0207779	1.05973	0.289286	0.562154
GO_REGULATION_OF_MAPK_CASCADE	Y	0.166672	556	0.0259077	0.00930015	2.78573	0.00534788	0.0411301
GO_DEVELOPMENTAL_PROGRAMMED_CELL_DEATH	Y	0.0115982	22	0.073054	0.038351	1.90488	0.0568167	0.209152
GO_POSITIVE_REGULATION_OF_SKELETAL_MUSCLE_TISSUE_DEVELOPMENT	Y	0.0125682	24	0.0518193	0.0399098	1.29841	0.194167	0.450829
GO_FOCAL_ADHESION_ASSEMBLY	Y	0.0111538	21	0.0689943	0.0395165	1.74596	0.0808394	0.261758
GO_MYELOID_LEUKOCYTE_MIGRATION	Y	0.0310799	69	-0.00101392	0.0280643	-0.0361285	0.97118	0.985154
GO_COLLAGEN_FIBRIL_ORGANIZATION	Y	0.018286	37	0.0319396	0.0343251	0.930502	0.352127	0.61388
GO_ICOSANOID_BIOSYNTHETIC_PROCESS	Y	0.015568	31	-0.111475	0.0557142	-2.00083	0.0454301	0.180056
GO_POSITIVE_REGULATION_OF_NEURON_DEATH	Y	0.026562	58	0.0728978	0.0238127	3.06129	0.00220802	0.0209856
GO_RESPONSE_TO_ESTRADIOL	Y	0.0526269	130	0.0185858	0.0192606	0.964965	0.334579	0.604331
GO_CORONARY_VASCULATURE_DEVELOPMENT	Y	0.0178902	36	-0.00134888	0.0388484	-0.0347216	0.972302	0.985433
GO_CARTILAGE_DEVELOPMENT	Y	0.0537221	134	0.0493294	0.0171486	2.87659	0.00402603	0.0336322
GO_REGULATION_OF_TUMOR_NECROSIS_FACTOR_SUPERFAMILY_CYTOKINE_PRODUCTION	Y	0.0347883	79	-0.0256148	0.0283046	-0.904971	0.365497	0.630387
GO_NEURON_PROJECTION_EXTENSION	Y	0.0227439	48	0.0549952	0.0279893	1.96486	0.0494498	0.190236
GO_REGULATION_OF_CARDIAC_MUSCLE_TISSUE_DEVELOPMENT	Y	0.0203844	42	0.028141	0.0326662	0.861472	0.388993	0.650839
GO_NEGATIVE_REGULATION_OF_CYCLIC_NUCLEOTIDE_METABOLIC_PROCESS	Y	0.0174289	35	0.0358665	0.0348755	1.02841	0.303772	0.57609
GO_PYRIMIDINE_NUCLEOTIDE_BIOSYNTHETIC_PROCESS	Y	0.0115665	22	-0.123036	0.0689788	-1.78367	0.0744987	0.248015
GO_RESPONSE_TO_MUSCLE_STRETCH	Y	0.0101283	19	0.0957736	0.0393024	2.43684	0.0148287	0.083331
GO_NEGATIVE_REGULATION_OF_OLIGODENDROCYTE_DIFFERENTIATION	Y	0.00639375	11	-0.0254111	0.0754956	-0.336591	0.73643	0.878431
GO_ENTRY_INTO_CELL_OF_OTHER_ORGANISM_INVOLVED_IN_SYMBIOTIC_INTERACTION	Y	0.0329264	74	0.0254108	0.0248644	1.02198	0.306809	0.577969
GO_REGULATION_OF_PHOSPHATIDYLINOSITOL_3_KINASE_SIGNALING	Y	0.0511689	126	0.0393376	0.0182543	2.15498	0.03118	0.138966
GO_RESPONSE_TO_COLD	Y	0.0203786	42	-0.0356621	0.0398483	-0.894948	0.37083	0.637706
GO_NEGATIVE_REGULATION_OF_SODIUM_ION_TRANSPORT	Y	0.00526977	9	0.0991551	0.0542018	1.82937	0.0673656	0.232812
GO_CELLULAR_RESPONSE_TO_INTERLEUKIN_1	Y	0.0303167	67	0.00855262	0.0276327	0.309511	0.756937	0.889957
GO_CIRCULATORY_SYSTEM_PROCESS	Y	0.1086	319	0.0105155	0.012716	0.826953	0.408278	0.665925
GO_REGULATION_OF_VASODILATION	Y	0.0203556	42	-0.0483576	0.041179	-1.17433	0.240284	0.511223
GO_REGULATION_OF_TRIGLYCERIDE_METABOLIC_PROCESS	Y	0.0126072	24	0.0287465	0.043082	0.66725	0.504623	0.737904
GO_NEGATIVE_REGULATION_OF_GLYCOPROTEIN_BIOSYNTHETIC_PROCESS	Y	0.00534788	9	-0.0576053	0.0912716	-0.631142	0.527958	0.753533
GO_RESPONSE_TO_COCAINE	Y	0.018168	37	0.0665547	0.0302772	2.19818	0.0279527	0.128629
GO_CELL_CHEMOTAXIS	Y	0.0492885	120	-0.0104767	0.0219464	-0.477379	0.633099	0.825157
GO_NEGATIVE_REGULATION_OF_INTRINSIC_APOPTOTIC_SIGNALING_PATHWAY_BY_P53_CLASS_MEDIATOR	Y	0.00935757	17	-0.0129834	0.0585724	-0.221665	0.824578	0.922742
GO_PROTEIN_DNA_COMPLEX_DISASSEMBLY	Y	0.00839193	15	0.00636985	0.0586796	0.108553	0.913559	0.958896
GO_RIBONUCLEOTIDE_CATABOLIC_PROCESS	Y	0.0125799	24	0.0464722	0.0404051	1.15016	0.250098	0.522216
GO_POSITIVE_REGULATION_OF_MITOTIC_SISTER_CHROMATID_SEPARATION	Y	0.00732768	13	0.0794016	0.0479479	1.656	0.0977445	0.296097
GO_DNA_TEMPLATED_TRANSCRIPTION_TERMINATION	Y	0.0347199	79	-0.0479469	0.0301498	-1.59029	0.111792	0.320499
GO_NEGATIVE_REGULATION_OF_INTERLEUKIN_1_PRODUCTION	Y	0.00788532	14	-0.0462303	0.0714333	-0.647182	0.517525	0.746267
GO_POSITIVE_REGULATION_OF_CATION_CHANNEL_ACTIVITY	Y	0.0151951	30	0.0628357	0.0344748	1.82266	0.0683767	0.234975
GO_REGULATION_OF_PROSTAGLANDIN_SECRETION	Y	0.00629266	11	0.0958427	0.0489892	1.9564	0.0504374	0.192681
GO_REGULATION_OF_PODOSOME_ASSEMBLY	Y	0.00740602	13	-0.00474788	0.0652834	-0.0727272	0.942024	0.969605
GO_REGULATION_OF_CELLULAR_SENESCENCE	Y	0.0112417	21	0.0142079	0.0483981	0.293563	0.769097	0.895999
GO_PURINE_RIBONUCLEOSIDE_CATABOLIC_PROCESS	Y	0.00690424	12	-0.010548	0.0691689	-0.152497	0.878797	0.947688
GO_CARDIAC_LEFT_VENTRICLE_MORPHOGENESIS	Y	0.00581356	10	0.0848043	0.0530025	1.6	0.10962	0.317401
GO_NEGATIVE_REGULATION_OF_STRIATED_MUSCLE_CELL_DIFFERENTIATION	Y	0.0112431	21	0.0102853	0.0489753	0.210011	0.833662	0.927003
GO_RESPONSE_TO_AMINE	Y	0.0183047	37	0.0194301	0.0358486	0.542004	0.587824	0.797651
GO_REGULATION_OF_ORGANIC_ACID_TRANSPORT	Y	0.0207216	43	0.0530053	0.0295158	1.79583	0.0725438	0.244245
GO_REGULATION_OF_DNA_DEPENDENT_DNA_REPLICATION	Y	0.0174635	35	-0.00353455	0.0396681	-0.0891031	0.929001	0.965756
GO_NEGATIVE_REGULATION_OF_POTASSIUM_ION_TRANSMEMBRANE_TRANSPORTER_ACTIVITY	Y	0.00737383	13	0.054235	0.0540087	1.00419	0.315304	0.586039
GO_PROTEIN_HOMOTETRAMERIZATION	Y	0.020404	42	-0.0141147	0.0374096	-0.3773	0.705956	0.865792
GO_IMMUNE_SYSTEM_PROCESS	Y	0.338164	1486	0.00603535	0.00626586	0.963212	0.335458	0.604331
GO_HEART_TRABECULA_MORPHOGENESIS	Y	0.012565	24	0.0532061	0.0394756	1.34782	0.177737	0.425636
GO_RESPIRATORY_CHAIN_COMPLEX_IV_ASSEMBLY	Y	0.00637415	11	-0.0649005	0.0837465	-0.774963	0.438374	0.691912
GO_VESICLE_LOCALIZATION	Y	0.0762448	205	0.0246595	0.0150919	1.63395	0.102291	0.305298
GO_NITRIC_OXIDE_METABOLIC_PROCESS	Y	0.00790124	14	0.00783573	0.0604781	0.129563	0.896914	0.954998
GO_POSITIVE_REGULATION_OF_LEUKOCYTE_APOPTOTIC_PROCESS	Y	0.0102963	19	0.0303817	0.0481548	0.630918	0.528105	0.753533
GO_POSITIVE_REGULATION_OF_CELL_FATE_COMMITMENT	Y	0.00535434	9	-0.0430871	0.0880166	-0.489534	0.624471	0.821121
GO_FOREBRAIN_MORPHOGENESIS	Y	0.00690352	12	-0.0144619	0.0700246	-0.206526	0.836383	0.928003
GO_TELOMERE_CAPPING	Y	0.009293	17	-0.0912351	0.0726768	-1.25535	0.209371	0.470629
GO_PROSTATE_GLAND_MORPHOGENESIS	Y	0.0107236	20	0.0567999	0.0425062	1.33627	0.181482	0.431494
GO_NEGATIVE_REGULATION_OF_AXON_EXTENSION	Y	0.0173527	35	0.0604126	0.0317887	1.90044	0.0573953	0.211115
GO_POSITIVE_REGULATION_OF_TYPE_I_INTERFERON_PRODUCTION	Y	0.0264212	57	-0.0312744	0.0339493	-0.921209	0.356957	0.619515
GO_REGULATION_OF_STRESS_ACTIVATED_PROTEIN_KINASE_SIGNALING_CASCADE	Y	0.0673478	177	0.0540998	0.0147237	3.67434	0.000239351	0.0039493
GO_MYELOID_CELL_DEVELOPMENT	Y	0.0194348	40	0.0634601	0.0296464	2.14057	0.032326	0.142691
GO_NEGATIVE_REGULATION_OF_KINASE_ACTIVITY	Y	0.0797841	217	0.0286957	0.0144822	1.98144	0.0475613	0.185813
GO_REGULATION_OF_MITOCHONDRIAL_MEMBRANE_PERMEABILITY_INVOLVED_IN_APOPTOTIC_PROCESS	Y	0.0107575	20	0.0370228	0.0459827	0.805147	0.420748	0.676749
GO_INTRACELLULAR_PROTEIN_TRANSPORT	Y	0.182538	626	0.00188005	0.00942792	0.199413	0.841943	0.928992
GO_REGULATION_OF_HISTONE_DEACETYLATION	Y	0.010528	20	0.106752	0.0350315	3.04733	0.00231316	0.0216562
GO_REGULATION_OF_PHOSPHATASE_ACTIVITY	Y	0.045419	109	0.0361846	0.0198003	1.82748	0.0676489	0.233336
GO_NEUROTRANSMITTER_UPTAKE	Y	0.00788449	14	0.0395889	0.0543054	0.729004	0.466011	0.70959
GO_MICROTUBULE_ANCHORING	Y	0.00914553	17	0.106836	0.0387077	2.76007	0.00578633	0.0428982
GO_CELL_DIVISION	Y	0.130538	404	0.0213514	0.0109737	1.94569	0.0517116	0.196259
GO_REGULATION_OF_MRNA_CATABOLIC_PROCESS	Y	0.0114702	22	0.100536	0.0350995	2.8643	0.00418551	0.0342873
GO_INTERMEDIATE_FILAMENT_ORGANIZATION	Y	0.00925135	17	-0.122623	0.078028	-1.57153	0.116083	0.328348
GO_REGULATION_OF_INTERLEUKIN_10_PRODUCTION	Y	0.0178884	36	-0.00905478	0.0397823	-0.227609	0.819954	0.920223
GO_SODIUM_ION_EXPORT	Y	0.00534756	9	0.0467991	0.0663372	0.705474	0.480527	0.720267
GO_NEGATIVE_REGULATION_OF_CELL_DIVISION	Y	0.0219729	46	0.0465267	0.0292905	1.58846	0.112206	0.321288
GO_CELLULAR_RESPONSE_TO_UV	Y	0.024855	53	0.0216807	0.0297477	0.728818	0.466125	0.70959
GO_REGULATION_OF_NUCLEAR_DIVISION	Y	0.0522719	129	0.0238217	0.0190144	1.25283	0.21029	0.471948
GO_RESPONSE_TO_ACID_CHEMICAL	Y	0.0933727	264	0.0256695	0.0132997	1.93009	0.0536158	0.201027
GO_RESPONSE_TO_PROSTAGLANDIN_E	Y	0.0107555	20	0.0385406	0.0454776	0.847464	0.396751	0.656502
GO_NEGATIVE_REGULATION_OF_RESPONSE_TO_REACTIVE_OXYGEN_SPECIES	Y	0.00638951	11	-0.0367244	0.078062	-0.470452	0.638039	0.828013
GO_POSITIVE_REGULATION_OF_EPITHELIAL_TO_MESENCHYMAL_TRANSITION	Y	0.0159967	32	0.0762948	0.0311947	2.44576	0.0144668	0.0818908
GO_RESPONSE_TO_STEROID_HORMONE	Y	0.135652	425	0.0283866	0.0104838	2.70767	0.00678401	0.0487666
GO_POSITIVE_REGULATION_OF_RNA_SPLICING	Y	0.0116661	22	-0.0595541	0.0585909	-1.01644	0.309438	0.581562
GO_RESPONSE_TO_IMMOBILIZATION_STRESS	Y	0.0107625	20	-0.0379483	0.0582396	-0.651589	0.514677	0.744335
GO_RESPONSE_TO_INTERLEUKIN_4	Y	0.0139461	27	-0.0419608	0.0505424	-0.83021	0.406434	0.664957
GO_POSITIVE_REGULATION_OF_KERATINOCYTE_DIFFERENTIATION	Y	0.00582528	10	0.0786827	0.0549079	1.43299	0.151882	0.385547
GO_CARDIAC_CHAMBER_MORPHOGENESIS	Y	0.0407895	96	0.0483224	0.0202358	2.38797	0.0169551	0.0916285
GO_REGULATION_OF_CARTILAGE_DEVELOPMENT	Y	0.025981	56	0.0422285	0.0269176	1.56881	0.116716	0.329538
GO_POSITIVE_REGULATION_OF_INTERLEUKIN_8_PRODUCTION	Y	0.0170044	34	-0.0400667	0.0448017	-0.894313	0.37117	0.637706
GO_SEROTONIN_METABOLIC_PROCESS	Y	0.00583593	10	0.0723782	0.0567298	1.27584	0.202033	0.461993
GO_REGULATION_OF_DEFENSE_RESPONSE_TO_VIRUS	Y	0.0588545	149	-0.0218354	0.0203864	-1.07107	0.284154	0.557407
GO_RESPONSE_TO_PEPTIDE	Y	0.116441	349	0.0230714	0.0117131	1.96972	0.0488905	0.1891
GO_REGULATION_OF_ENDOTHELIAL_CELL_APOPTOTIC_PROCESS	Y	0.0174561	35	0.0175756	0.0370751	0.474056	0.635468	0.826193
GO_DNA_DEPENDENT_DNA_REPLICATION	Y	0.0358818	82	-0.0291062	0.0280878	-1.03626	0.300099	0.57294
GO_REGULATION_OF_SKELETAL_MUSCLE_CELL_DIFFERENTIATION	Y	0.00880279	16	0.0715035	0.0448812	1.59317	0.111144	0.319823
GO_POSITIVE_REGULATION_OF_CELLULAR_PROTEIN_CATABOLIC_PROCESS	Y	0.0604946	154	0.0115934	0.0181129	0.640063	0.522142	0.748737
GO_STEROL_HOMEOSTASIS	Y	0.0212328	44	-0.00848119	0.035937	-0.236002	0.813435	0.917273
GO_POSITIVE_REGULATION_OF_MITOTIC_METAPHASE_ANAPHASE_TRANSITION	Y	0.00732768	13	0.0794016	0.0479479	1.656	0.0977445	0.296097
GO_EMBRYONIC_AXIS_SPECIFICATION	Y	0.0148296	29	0.0364937	0.0381842	0.955727	0.339227	0.606342
GO_REGULATION_OF_LEUKOCYTE_APOPTOTIC_PROCESS	Y	0.0279832	61	0.0262027	0.0273295	0.958772	0.33769	0.606201
GO_POSITIVE_REGULATION_OF_INTERLEUKIN_1_BETA_PRODUCTION	Y	0.0102813	19	-0.0525848	0.0619904	-0.848273	0.396301	0.65599
GO_CELLULAR_RESPONSE_TO_LIPID	Y	0.129616	402	0.0421916	0.0103273	4.08545	4.42363e-05	0.00105016
GO_SECRETION_BY_CELL	Y	0.131169	407	0.0291032	0.0106772	2.72573	0.00642401	0.0463425
GO_LIPOPROTEIN_METABOLIC_PROCESS	Y	0.0416788	98	-0.00603082	0.0239404	-0.251909	0.801115	0.909514
GO_DISRUPTION_OF_CELLS_OF_OTHER_ORGANISM_INVOLVED_IN_SYMBIOTIC_INTERACTION	Y	0.00369672	6	0.0925522	0.0691922	1.33761	0.181045	0.430896
GO_IRON_COORDINATION_ENTITY_TRANSPORT	Y	0.00481519	8	0.0540585	0.0681045	0.793759	0.427349	0.681678
GO_PHOSPHATIDYLCHOLINE_BIOSYNTHETIC_PROCESS	Y	0.011707	22	0.00148446	0.0492288	0.0301544	0.975944	0.987719
GO_KERATAN_SULFATE_METABOLIC_PROCESS	Y	0.0148356	29	-0.0381935	0.0482244	-0.791996	0.428377	0.683082
GO_REGULATION_OF_COAGULATION	Y	0.0340677	77	0.0144108	0.0253014	0.569567	0.56898	0.786298
GO_MEMBRANE_BIOGENESIS	Y	0.0142336	28	0.0823084	0.0329288	2.49959	0.0124451	0.073767
GO_REGULATION_OF_EPIDERMIS_DEVELOPMENT	Y	0.025269	54	0.00568637	0.0310428	0.183178	0.854661	0.935469
GO_FORMATION_OF_PRIMARY_GERM_LAYER	Y	0.0437886	104	0.0049922	0.0224615	0.222256	0.824118	0.922671
GO_NEGATIVE_REGULATION_OF_MUSCLE_CELL_DIFFERENTIATION	Y	0.0220253	46	0.0287683	0.0311502	0.923534	0.355745	0.617884
GO_ENERGY_RESERVE_METABOLIC_PROCESS	Y	0.0248642	53	0.0154002	0.0303551	0.507334	0.611929	0.813502
GO_GLYCOLIPID_BIOSYNTHETIC_PROCESS	Y	0.0260581	56	-0.00826754	0.0318464	-0.259607	0.795171	0.90698
GO_REGULATION_OF_ACTIN_NUCLEATION	Y	0.0134946	26	0.0387534	0.0400342	0.968009	0.333057	0.603366
GO_REGULATION_OF_DENDRITIC_CELL_DIFFERENTIATION	Y	0.00306594	5	-0.313715	0.187557	-1.67264	0.094421	0.290674
GO_EPITHELIAL_CELL_DEVELOPMENT	Y	0.0629841	164	0.0698552	0.0145475	4.80186	1.58822e-06	6.2627e-05
GO_HAIR_CYCLE	Y	0.0313193	70	0.0491774	0.0235206	2.09082	0.0365619	0.155252
GO_AMIDE_TRANSPORT	Y	0.0351868	80	-0.00447267	0.0263552	-0.169707	0.865243	0.941308
GO_REGULATION_OF_INTERFERON_GAMMA_PRODUCTION	Y	0.0324782	73	-0.0527678	0.0316875	-1.66525	0.0958844	0.293124
GO_NEGATIVE_REGULATION_OF_LIPID_METABOLIC_PROCESS	Y	0.0272259	59	0.0158704	0.0287367	0.552269	0.580773	0.792707
GO_PROTEIN_LOCALIZATION_TO_KINETOCHORE	Y	0.00586429	10	-0.0622053	0.0872792	-0.712716	0.476033	0.717055
GO_NEGATIVE_REGULATION_OF_FAT_CELL_DIFFERENTIATION	Y	0.0190861	39	0.0474818	0.0318659	1.49005	0.136233	0.36334
GO_PHOTOPERIODISM	Y	0.0107724	20	0.0211941	0.0484069	0.437832	0.661515	0.84072
GO_ALPHA_AMINO_ACID_BIOSYNTHETIC_PROCESS	Y	0.0261657	57	-0.106603	0.0411973	-2.58763	0.00967381	0.0633083
GO_MESENCHYMAL_TO_EPITHELIAL_TRANSITION	Y	0.00739959	13	0.0261714	0.0590008	0.443578	0.657354	0.838451
GO_ESTABLISHMENT_OF_ENDOTHELIAL_INTESTINAL_BARRIER	Y	0.00638546	11	0.0381144	0.0614367	0.620385	0.535015	0.758971
GO_SALIVARY_GLAND_DEVELOPMENT	Y	0.0147043	29	0.0756041	0.03314	2.28136	0.0225421	0.111465
GO_CELL_CYCLE_DNA_REPLICATION	Y	0.00410348	7	-0.343173	0.173526	-1.97764	0.0479884	0.186989
GO_NEGATIVE_REGULATION_OF_TRANSCRIPTION_ELONGATION_FROM_RNA_POLYMERASE_II_PROMOTER	Y	0.00624899	11	-0.201397	0.116008	-1.73606	0.0825759	0.2648
GO_CHROMOSOME_CONDENSATION	Y	0.0121603	23	0.018711	0.0456206	0.410144	0.681707	0.85221
GO_POSITIVE_REGULATION_OF_RESPONSE_TO_STIMULUS	Y	0.351238	1578	0.0268939	0.00581852	4.62212	3.83226e-06	0.000130157
GO_REGULATION_OF_MONOOXYGENASE_ACTIVITY	Y	0.0236714	50	-0.00810265	0.0336811	-0.24057	0.809892	0.914768
GO_SENSORY_PERCEPTION_OF_MECHANICAL_STIMULUS	Y	0.0525715	130	0.0299715	0.0185586	1.61497	0.106341	0.311982
GO_ESTABLISHMENT_OF_EPITHELIAL_CELL_POLARITY	Y	0.0111972	21	0.0519624	0.0424987	1.22268	0.22147	0.484813
GO_TOLL_LIKE_RECEPTOR_9_SIGNALING_PATHWAY	Y	0.00639574	11	0.0169582	0.0661594	0.256323	0.797705	0.908622
GO_EMBRYONIC_DIGIT_MORPHOGENESIS	Y	0.0248313	53	0.0321986	0.0286953	1.12209	0.261845	0.535474
GO_REGULATION_OF_CANONICAL_WNT_SIGNALING_PATHWAY	Y	0.0753481	202	0.0239872	0.0152335	1.57464	0.115363	0.32686
GO_NITROGEN_CYCLE_METABOLIC_PROCESS	Y	0.00788236	14	-0.0506304	0.0726994	-0.696435	0.486168	0.723884
GO_DETECTION_OF_TEMPERATURE_STIMULUS_INVOLVED_IN_SENSORY_PERCEPTION_OF_PAIN	Y	0.00587739	10	-0.0349265	0.0814173	-0.428981	0.667944	0.844708
GO_T_CELL_ACTIVATION_INVOLVED_IN_IMMUNE_RESPONSE	Y	0.01911	39	0.0395505	0.0327601	1.20728	0.227346	0.492935
GO_NEGATIVE_REGULATION_OF_LEUKOCYTE_PROLIFERATION	Y	0.0240744	51	-0.00342581	0.0328689	-0.104227	0.916991	0.959852
GO_NECROPTOTIC_PROCESS	Y	0.00887242	16	-0.0243138	0.0624174	-0.389536	0.696885	0.859898
GO_NEGATIVE_REGULATION_OF_GLIOGENESIS	Y	0.0164384	33	0.0736753	0.0316653	2.32669	0.0199962	0.101574
GO_DENDRITIC_CELL_CHEMOTAXIS	Y	0.00632369	11	-0.12739	0.0971448	-1.31134	0.189765	0.443485
GO_REGULATION_OF_ANTIGEN_PROCESSING_AND_PRESENTATION_OF_PEPTIDE_ANTIGEN	Y	0.00425074	7	-0.126214	0.120564	-1.04686	0.295181	0.569671
GO_REGULATION_OF_NEURONAL_SYNAPTIC_PLASTICITY	Y	0.0206139	43	0.0726199	0.0273597	2.65426	0.00795716	0.0541296
GO_REGULATION_OF_PHOSPHOLIPASE_C_ACTIVITY	Y	0.0169	34	0.0666272	0.0315434	2.11224	0.0346836	0.150263
GO_REGULATION_OF_DEVELOPMENTAL_GROWTH	Y	0.0899065	255	0.0684201	0.0118044	5.79616	6.9312e-09	4.96168e-07
GO_MEMBRANE_DISASSEMBLY	Y	0.0187175	38	0.0265182	0.0345913	0.766616	0.443323	0.695682
GO_REGULATION_OF_SYNAPTIC_TRANSMISSION_GLUTAMATERGIC	Y	0.0207311	43	0.0507107	0.0297833	1.70265	0.0886549	0.279479
GO_ACTIVATION_OF_PHOSPHOLIPASE_C_ACTIVITY	Y	0.0121625	23	0.0148733	0.0460954	0.322663	0.746956	0.883473
GO_NEGATIVE_REGULATION_OF_BIOMINERAL_TISSUE_DEVELOPMENT	Y	0.00887365	16	0.0196247	0.0544165	0.360639	0.718375	0.870843
GO_NEGATIVE_REGULATION_OF_BONE_RESORPTION	Y	0.00638995	11	-0.0357032	0.0777602	-0.459145	0.646137	0.83202
GO_CELLULAR_RESPONSE_TO_EXTERNAL_STIMULUS	Y	0.083155	228	0.0023348	0.0153678	0.151928	0.879246	0.947688
GO_NADP_METABOLIC_PROCESS	Y	0.0120234	23	-0.120854	0.0668875	-1.80682	0.0708114	0.2398
GO_POSITIVE_REGULATION_OF_MRNA_PROCESSING	Y	0.0143226	28	0.0621313	0.0358871	1.7313	0.0834206	0.266774
GO_EPITHELIAL_TUBE_BRANCHING_INVOLVED_IN_LUNG_MORPHOGENESIS	Y	0.0121647	23	0.00942653	0.0469283	0.200871	0.840802	0.928897
GO_DETECTION_OF_MECHANICAL_STIMULUS_INVOLVED_IN_SENSORY_PERCEPTION	Y	0.0107104	20	0.0623771	0.0422069	1.47789	0.13946	0.367862
GO_REGULATION_OF_CELL_CELL_ADHESION_MEDIATED_BY_CADHERIN	Y	0.00477401	8	0.0873607	0.0595186	1.46779	0.142184	0.372304
GO_METANEPHRIC_EPITHELIUM_DEVELOPMENT	Y	0.0102922	19	0.0344542	0.0474454	0.726186	0.467737	0.710306
GO_REGULATION_OF_SMOOTH_MUSCLE_CELL_DIFFERENTIATION	Y	0.00887466	16	0.0173405	0.0548028	0.316416	0.751692	0.886125
GO_FATTY_ACID_BETA_OXIDATION	Y	0.019721	41	-0.126297	0.0502302	-2.51436	0.0119359	0.0719401
GO_ACTIN_FILAMENT_BASED_PROCESS	Y	0.127164	392	0.0400569	0.0105138	3.80993	0.000139598	0.00259819
GO_RESPONSE_TO_FLUID_SHEAR_STRESS	Y	0.0164892	33	0.063004	0.0324176	1.94351	0.0519743	0.196615
GO_NEGATIVE_REGULATION_OF_MUSCLE_CONTRACTION	Y	0.0107481	20	0.0437004	0.0447434	0.976688	0.328741	0.60009
GO_TRANSITION_METAL_ION_TRANSPORT	Y	0.0380468	88	-0.034255	0.0274549	-1.24768	0.212168	0.47394
GO_POSITIVE_REGULATION_OF_MUSCLE_CELL_DIFFERENTIATION	Y	0.0322916	73	0.0673203	0.0217199	3.09948	0.00194244	0.0190679
GO_REGULATION_OF_ADAPTIVE_IMMUNE_RESPONSE	Y	0.0413096	97	-0.0171279	0.0248795	-0.688435	0.491191	0.728333
GO_PHOSPHATIDYLINOSITOL_BIOSYNTHETIC_PROCESS	Y	0.0448343	107	-0.00421909	0.0227918	-0.185115	0.853142	0.934699
GO_POSITIVE_REGULATION_OF_CELL_COMMUNICATION	Y	0.308245	1301	0.0312524	0.00624768	5.00224	5.73553e-07	2.64232e-05
GO_POSITIVE_REGULATION_OF_LIPID_KINASE_ACTIVITY	Y	0.0148545	29	0.0158131	0.0409491	0.386164	0.699381	0.861699
GO_RESPONSE_TO_CORTICOSTEROID	Y	0.058559	148	0.0118933	0.0184553	0.644438	0.519302	0.747853
GO_POSITIVE_REGULATION_OF_LEUKOCYTE_DEGRANULATION	Y	0.00885806	16	-0.0477879	0.0665548	-0.718023	0.472755	0.71443
GO_SODIUM_ION_TRANSMEMBRANE_TRANSPORT	Y	0.0350377	80	0.0479694	0.0221909	2.16167	0.0306608	0.137177
GO_PROTEIN_UBIQUITINATION_INVOLVED_IN_UBIQUITIN_DEPENDENT_PROTEIN_CATABOLIC_PROCESS	Y	0.0475633	116	0.0610018	0.0175826	3.46944	0.000523118	0.00692367
GO_NEGATIVE_REGULATION_OF_BLOOD_VESSEL_ENDOTHELIAL_CELL_MIGRATION	Y	0.00935598	17	0.0167507	0.0532563	0.314529	0.753124	0.887161
GO_CELL_PROJECTION_ASSEMBLY	Y	0.0803788	219	0.028299	0.0144491	1.95853	0.0501879	0.192201
GO_REGULATION_OF_PROTEIN_IMPORT_INTO_NUCLEUS_TRANSLOCATION	Y	0.0107295	20	0.0540714	0.0435629	1.24123	0.214543	0.47774
GO_GLUCOCORTICOID_METABOLIC_PROCESS	Y	0.00639651	11	-0.0147518	0.0733004	-0.201251	0.840506	0.928897
GO_PROTEIN_MATURATION	Y	0.0782598	212	-0.0377329	0.0179222	-2.10538	0.0352764	0.151842
GO_SKELETAL_MUSCLE_ADAPTATION	Y	0.00535452	9	-0.0426451	0.087988	-0.484669	0.627919	0.821627
GO_PROTEIN_N_LINKED_GLYCOSYLATION	Y	0.0316082	71	0.0607942	0.0224599	2.70679	0.00680197	0.0487666
GO_ANAPHASE_PROMOTING_COMPLEX_DEPENDENT_CATABOLIC_PROCESS	Y	0.0239575	51	-0.0671732	0.0395015	-1.70052	0.0890551	0.280551
GO_HINDLIMB_MORPHOGENESIS	Y	0.0168813	34	0.0704254	0.0308618	2.28196	0.0225067	0.111408
GO_ESTABLISHMENT_OR_MAINTENANCE_OF_EPITHELIAL_CELL_APICAL_BASAL_POLARITY	Y	0.0139465	27	0.035427	0.0396745	0.892941	0.371904	0.637833
GO_LOOP_OF_HENLE_DEVELOPMENT	Y	0.00530696	9	0.080786	0.0579255	1.39465	0.163143	0.404106
GO_VESICLE_ORGANIZATION	Y	0.0900483	252	0.0160308	0.0140232	1.14317	0.25299	0.525049
GO_KERATINOCYTE_PROLIFERATION	Y	0.00585818	10	-0.0723429	0.0897393	-0.806145	0.420173	0.676749
GO_MACROPHAGE_ACTIVATION_INVOLVED_IN_IMMUNE_RESPONSE	Y	0.00535252	9	-0.047516	0.0887326	-0.535497	0.592315	0.799906
GO_INDOLALKYLAMINE_METABOLIC_PROCESS	Y	0.0068559	12	-0.0938947	0.0862699	-1.08838	0.276445	0.550218
GO_POSITIVE_REGULATION_OF_BINDING	Y	0.0449528	108	0.0508293	0.0189521	2.68199	0.00732707	0.0512954
GO_SMOOTH_MUSCLE_CELL_DIFFERENTIATION	Y	0.0134573	26	0.0554658	0.0375204	1.47828	0.139354	0.367791
GO_MALE_GENITALIA_DEVELOPMENT	Y	0.00935889	17	0.00646262	0.0551059	0.117276	0.906643	0.957237
GO_REGULATION_OF_HYDROLASE_ACTIVITY	Y	0.270817	1078	0.0239691	0.00690003	3.47376	0.000514767	0.00690263
GO_ENDOCARDIAL_CUSHION_DEVELOPMENT	Y	0.0148343	29	0.0337421	0.0384978	0.876467	0.380791	0.644512
GO_NEGATIVE_REGULATION_OF_ERBB_SIGNALING_PATHWAY	Y	0.0187197	38	0.0250834	0.0347281	0.72228	0.470135	0.713032
GO_RESPONSE_TO_DIETARY_EXCESS	Y	0.00931115	17	0.0574517	0.0467157	1.22981	0.218787	0.484079
GO_REGULATION_OF_MEIOTIC_NUCLEAR_DIVISION	Y	0.0121655	23	0.00638246	0.0474094	0.134624	0.892911	0.95349
GO_BRANCH_ELONGATION_OF_AN_EPITHELIUM	Y	0.00787798	14	0.0457671	0.0527751	0.867211	0.385841	0.648337
GO_POSITIVE_REGULATION_OF_CELLULAR_AMIDE_METABOLIC_PROCESS	Y	0.0372384	86	0.045484	0.0216356	2.10227	0.0355473	0.152584
GO_POSITIVE_REGULATION_OF_VACUOLE_ORGANIZATION	Y	0.00688456	12	0.0458442	0.0571916	0.80159	0.422804	0.677214
GO_NEGATIVE_REGULATION_OF_PLATELET_ACTIVATION	Y	0.00788544	14	0.0385769	0.0544819	0.708068	0.478915	0.719019
GO_GLUTAMINE_FAMILY_AMINO_ACID_CATABOLIC_PROCESS	Y	0.0116211	22	-0.0912769	0.0652769	-1.3983	0.162044	0.402871
GO_EMBRYONIC_SKELETAL_SYSTEM_DEVELOPMENT	Y	0.0466584	113	0.0516982	0.0184324	2.80474	0.00504269	0.0393025
GO_NEURON_MATURATION	Y	0.0141675	28	0.0933265	0.0316295	2.95062	0.00317662	0.0283701
GO_POSITIVE_REGULATION_OF_PHOSPHATE_METABOLIC_PROCESS	Y	0.229019	854	0.0306442	0.0075245	4.07259	4.6748e-05	0.00107682
GO_THYMIC_T_CELL_SELECTION	Y	0.00839071	15	-0.0131781	0.0623561	-0.211336	0.832628	0.926625
GO_CELLULAR_RESPONSE_TO_BIOTIC_STIMULUS	Y	0.0562869	141	0.00813723	0.0191271	0.42543	0.67053	0.845629
GO_COENZYME_A_METABOLIC_PROCESS	Y	0.00934873	17	-0.0328336	0.0622074	-0.527808	0.597641	0.80171
GO_PROTEIN_LOCALIZATION_TO_CILIUM	Y	0.0112012	21	-0.063201	0.0608173	-1.03919	0.298732	0.572016
GO_RNA_STABILIZATION	Y	0.014329	28	0.0602583	0.0359107	1.67801	0.0933684	0.288859
GO_ACTIN_MYOSIN_FILAMENT_SLIDING	Y	0.0143759	28	-0.0525264	0.0528334	-0.994189	0.320148	0.590427
GO_REGULATION_OF_CELL_MORPHOGENESIS_INVOLVED_IN_DIFFERENTIATION	Y	0.102975	304	0.076555	0.0105807	7.23532	4.88558e-13	7.83883e-11
GO_REGULATION_OF_PROTEIN_HOMODIMERIZATION_ACTIVITY	Y	0.010279	19	0.0446048	0.0457578	0.974802	0.329675	0.600854
GO_REGULATION_OF_HETEROTYPIC_CELL_CELL_ADHESION	Y	0.00885706	16	-0.049088	0.0669253	-0.733475	0.463281	0.70959
GO_CARBOXYLIC_ACID_CATABOLIC_PROCESS	Y	0.0645835	169	-0.0941644	0.0232309	-4.05341	5.07487e-05	0.00113502
GO_POSITIVE_REGULATION_OF_REACTIVE_OXYGEN_SPECIES_BIOSYNTHETIC_PROCESS	Y	0.0199766	41	-0.0267062	0.0393116	-0.679347	0.496929	0.73264
GO_ALPHA_AMINO_ACID_METABOLIC_PROCESS	Y	0.0718995	192	-0.0723191	0.0207257	-3.48935	0.000485687	0.00662728
GO_MITOCHONDRIAL_DNA_METABOLIC_PROCESS	Y	0.00778595	14	-0.144954	0.0948833	-1.5277	0.126609	0.348787
GO_CGMP_METABOLIC_PROCESS	Y	0.0116892	22	0.0325689	0.0446146	0.730005	0.465399	0.70959
GO_ADULT_BEHAVIOR	Y	0.0488285	121	0.0834916	0.0161289	5.17651	2.29208e-07	1.14678e-05
GO_RETINAL_GANGLION_CELL_AXON_GUIDANCE	Y	0.00968542	18	0.0909302	0.0397564	2.28718	0.0222	0.110242
GO_POSITIVE_REGULATION_OF_MEMBRANE_INVAGINATION	Y	0.00536184	9	-0.0182202	0.0817375	-0.22291	0.823608	0.922323
GO_SPINDLE_LOCALIZATION	Y	0.0172708	35	0.0765534	0.0302747	2.52862	0.011462	0.0699903
GO_HYDROGEN_PEROXIDE_CATABOLIC_PROCESS	Y	0.00636094	11	-0.0836296	0.088236	-0.947794	0.34325	0.607973
GO_ICOSANOID_TRANSPORT	Y	0.00838816	15	-0.0214237	0.0639855	-0.334821	0.737765	0.878542
GO_CELLULAR_RESPONSE_TO_ORGANIC_CYCLIC_COMPOUND	Y	0.131445	409	0.0391768	0.0103377	3.78971	0.000151455	0.00278545
GO_POSITIVE_REGULATION_OF_CYTOKINE_PRODUCTION_INVOLVED_IN_IMMUNE_RESPONSE	Y	0.0135216	26	0.0141975	0.0434561	0.326708	0.743894	0.88264
GO_REGULATION_OF_PROTEIN_SUMOYLATION	Y	0.00789441	14	-0.0300392	0.0678019	-0.443044	0.657741	0.838485
GO_RESPONSE_TO_ENDOPLASMIC_RETICULUM_STRESS	Y	0.0754322	202	0.000801106	0.0163884	0.0488825	0.961014	0.979754
GO_CELLULAR_RESPONSE_TO_LIGHT_STIMULUS	Y	0.0317722	71	0.0341543	0.0246831	1.38371	0.166469	0.40918
GO_POSITIVE_REGULATION_BY_HOST_OF_VIRAL_TRANSCRIPTION	Y	0.00635244	11	0.0676844	0.0559871	1.20893	0.226711	0.491789
GO_NEGATIVE_REGULATION_OF_STEM_CELL_DIFFERENTIATION	Y	0.019925	41	0.0455638	0.0310794	1.46604	0.142659	0.372399
GO_NEGATIVE_REGULATION_OF_PRODUCTION_OF_MOLECULAR_MEDIATOR_OF_IMMUNE_RESPONSE	Y	0.0116909	22	-0.0356896	0.0550417	-0.64841	0.51673	0.745765
GO_SPHINGOLIPID_MEDIATED_SIGNALING_PATHWAY	Y	0.00533633	9	-0.0787395	0.0959265	-0.820832	0.411756	0.66896
GO_SYNAPTIC_VESICLE_CYTOSKELETAL_TRANSPORT	Y	0.00638429	11	0.0396941	0.0611955	0.648644	0.516579	0.745765
GO_LUNG_CELL_DIFFERENTIATION	Y	0.0116112	23	0.136927	0.0299735	4.56827	4.95959e-06	0.000163667
GO_PLATELET_ACTIVATION	Y	0.0523054	129	-0.0157766	0.0215118	-0.733393	0.463331	0.70959
GO_CYTOSKELETON_ORGANIZATION	Y	0.20178	718	0.0277029	0.00821165	3.37361	0.000743905	0.00899063
GO_NUCLEOTIDE_BINDING_DOMAIN_LEUCINE_RICH_REPEAT_CONTAINING_RECEPTOR_SIGNALING_PATHWAY	Y	0.0130242	25	0.0496315	0.0390712	1.27028	0.204005	0.464173
GO_TRANSCRIPTION_COUPLED_NUCLEOTIDE_EXCISION_REPAIR	Y	0.0256327	55	-0.0322792	0.0345209	-0.935061	0.349773	0.611839
GO_MEMBRANE_DEPOLARIZATION_DURING_ACTION_POTENTIAL	Y	0.0167547	34	0.0904576	0.0291373	3.10454	0.00190958	0.0189205
GO_MATURATION_OF_SSU_RRNA	Y	0.0129567	25	-0.102449	0.0612083	-1.67378	0.0941969	0.29037
GO_BETA_AMYLOID_METABOLIC_PROCESS	Y	0.00639338	11	0.0239017	0.0645716	0.370159	0.71127	0.868681
GO_REGULATION_OF_SPHINGOLIPID_BIOSYNTHETIC_PROCESS	Y	0.00639707	11	0.0110623	0.0674655	0.16397	0.869757	0.943792
GO_RESPONSE_TO_WOUNDING	Y	0.145174	463	1.41129e-05	0.0109551	0.00128825	0.998972	0.999399
GO_NON_CANONICAL_WNT_SIGNALING_PATHWAY	Y	0.0470391	114	0.0478625	0.0186504	2.5663	0.0102894	0.0655844
GO_RENAL_SYSTEM_PROCESS_INVOLVED_IN_REGULATION_OF_BLOOD_VOLUME	Y	0.00632123	11	-0.130025	0.098399	-1.3214	0.186388	0.439523
GO_NEGATIVE_REGULATION_OF_LEUKOCYTE_MEDIATED_IMMUNITY	Y	0.0152665	30	0.0374597	0.0373832	1.00205	0.316339	0.587141
GO_POSITIVE_REGULATION_OF_CREB_TRANSCRIPTION_FACTOR_ACTIVITY	Y	0.00712376	13	0.131452	0.0382527	3.43642	0.000591169	0.00749513
GO_NEGATIVE_REGULATION_OF_CELL_GROWTH	Y	0.057733	146	0.040908	0.0169051	2.41986	0.0155391	0.0862808
GO_MODIFIED_AMINO_ACID_TRANSPORT	Y	0.0121214	23	-0.0610013	0.0576063	-1.05894	0.289647	0.562257
GO_CGMP_BIOSYNTHETIC_PROCESS	Y	0.00788909	14	-0.0401403	0.0700819	-0.572763	0.566815	0.784703
GO_PROTEIN_SECRETION	Y	0.0405639	95	0.0273803	0.0218536	1.2529	0.210265	0.471948
GO_ALTERNATIVE_MRNA_SPLICING_VIA_SPLICEOSOME	Y	0.00588339	10	-0.0127683	0.0762928	-0.16736	0.867089	0.942238
GO_ASSOCIATIVE_LEARNING	Y	0.0280042	62	0.081695	0.0224846	3.63337	0.000280747	0.00444325
GO_SNORNA_METABOLIC_PROCESS	Y	0.00313519	5	-0.173497	0.154299	-1.12442	0.260855	0.535211
GO_NEGATIVE_REGULATION_OF_CELLULAR_CATABOLIC_PROCESS	Y	0.0519905	128	0.00250855	0.0204231	0.122829	0.902244	0.956438
GO_REGULATION_OF_RESPONSE_TO_EXTRACELLULAR_STIMULUS	Y	0.0607459	155	-0.0305082	0.0205204	-1.48673	0.13711	0.363724
GO_COFACTOR_TRANSPORT	Y	0.0121313	23	-0.0530883	0.0566617	-0.936936	0.348808	0.6113
GO_POSITIVE_REGULATION_OF_FAT_CELL_DIFFERENTIATION	Y	0.0209994	44	0.0756408	0.027183	2.78265	0.00539889	0.0413856
GO_NEGATIVE_REGULATION_OF_PROTEIN_POLYMERIZATION	Y	0.0207813	43	0.035345	0.0315448	1.12047	0.262534	0.535987
GO_EXOGENOUS_DRUG_CATABOLIC_PROCESS	Y	0.00371064	6	0.0816591	0.0734394	1.11192	0.26619	0.539922
GO_NEGATIVE_REGULATION_OF_REACTIVE_OXYGEN_SPECIES_METABOLIC_PROCESS	Y	0.0174618	35	0.00898122	0.038127	0.235561	0.813777	0.917273
GO_REGULATION_OF_PROTEIN_DEACETYLATION	Y	0.0146115	29	0.0917561	0.0312376	2.93736	0.00331558	0.0290095
GO_OTIC_VESICLE_DEVELOPMENT	Y	0.00838163	15	0.0306827	0.0541504	0.566619	0.570982	0.786963
GO_POSITIVE_REGULATION_OF_DNA_TEMPLATED_TRANSCRIPTION_INITIATION	Y	0.0107788	20	-0.00310855	0.0523818	-0.059344	0.952679	0.975267
GO_NEURON_PROJECTION_EXTENSION_INVOLVED_IN_NEURON_PROJECTION_GUIDANCE	Y	0.0063889	11	0.0328564	0.0627752	0.523397	0.600706	0.804068
GO_PHOSPHOLIPID_DEPHOSPHORYLATION	Y	0.0156814	31	0.0467978	0.0355684	1.31571	0.188292	0.442158
GO_NEGATIVE_REGULATION_OF_DNA_REPAIR	Y	0.00785461	14	0.0619556	0.0502938	1.23187	0.218017	0.483441
GO_METAL_ION_TRANSPORT	Y	0.152777	495	0.00922277	0.0103228	0.893433	0.37164	0.637706
GO_INSULIN_SECRETION	Y	0.016602	33	0.0105986	0.0390503	0.271409	0.78608	0.903119
GO_POSITIVE_REGULATION_OF_FIBROBLAST_PROLIFERATION	Y	0.0228176	48	0.0363088	0.029761	1.22001	0.222481	0.486011
GO_PREASSEMBLY_OF_GPI_ANCHOR_IN_ER_MEMBRANE	Y	0.00733735	13	-0.10959	0.0867626	-1.2631	0.206574	0.467278
GO_NECROTIC_CELL_DEATH	Y	0.0112402	21	-0.0186201	0.0535929	-0.347437	0.728268	0.874035
GO_REGULATION_OF_MAST_CELL_ACTIVATION_INVOLVED_IN_IMMUNE_RESPONSE	Y	0.0126197	24	0.0120614	0.0455421	0.264841	0.791136	0.905427
GO_POSITIVE_REGULATION_OF_CELLULAR_AMINE_METABOLIC_PROCESS	Y	0.00587826	10	-0.0325329	0.080788	-0.402695	0.687179	0.855618
GO_POSITIVE_REGULATION_OF_INTRACELLULAR_PROTEIN_TRANSPORT	Y	0.080173	218	0.0160096	0.0150542	1.06347	0.287589	0.560131
GO_REGULATION_BY_VIRUS_OF_VIRAL_PROTEIN_LEVELS_IN_HOST_CELL	Y	0.00427893	7	0.055541	0.0717912	0.773647	0.439153	0.692436
GO_CHROMOSOME_LOCALIZATION	Y	0.0248717	53	0.00627785	0.0312722	0.200749	0.840898	0.928897
GO_REGULATION_OF_RESPIRATORY_SYSTEM_PROCESS	Y	0.00879096	16	0.07605	0.0455087	1.67111	0.0947222	0.290921
GO_POSITIVE_REGULATION_OF_ADENYLATE_CYCLASE_ACTIVITY	Y	0.0190954	39	0.0446094	0.0320571	1.39156	0.164078	0.405878
GO_POSITIVE_REGULATION_OF_NEURON_DIFFERENTIATION	Y	0.0939003	273	0.0902869	0.0106321	8.49189	2.23571e-17	8.66897e-15
GO_EMBRYONIC_SKELETAL_SYSTEM_MORPHOGENESIS	Y	0.0372133	86	0.048921	0.0212934	2.29747	0.0216066	0.107755
GO_ATP_SYNTHESIS_COUPLED_PROTON_TRANSPORT	Y	0.00813022	15	-0.241368	0.113994	-2.11738	0.0342451	0.148918
GO_ACTIVATION_OF_GTPASE_ACTIVITY	Y	0.029036	64	0.0507171	0.0245116	2.06911	0.0385545	0.160747
GO_INOSITOL_PHOSPHATE_METABOLIC_PROCESS	Y	0.022861	48	-0.0137019	0.0349749	-0.391763	0.695239	0.859452
GO_T_CELL_HOMEOSTASIS	Y	0.0138522	27	0.0699504	0.0356031	1.96473	0.0494656	0.190236
GO_REGULATION_OF_RECEPTOR_ACTIVITY	Y	0.0421729	100	0.050957	0.0196714	2.59041	0.00959622	0.0629777
GO_HISTONE_METHYLATION	Y	0.0325238	74	0.0791005	0.0206462	3.83123	0.000128061	0.00242933
GO_CELLULAR_RESPONSE_TO_FLUID_SHEAR_STRESS	Y	0.0103077	19	0.0118211	0.0512386	0.230707	0.817546	0.919536
GO_POSITIVE_REGULATION_OF_TRANSPORTER_ACTIVITY	Y	0.0283168	62	0.0414731	0.0258028	1.60731	0.108008	0.315283
GO_POSITIVE_REGULATION_OF_TRANSCRIPTION_FACTOR_IMPORT_INTO_NUCLEUS	Y	0.019158	39	-0.00112014	0.0373017	-0.0300292	0.976044	0.987719
GO_CELLULAR_RESPONSE_TO_SUPEROXIDE	Y	0.00373753	6	-0.0618031	0.112893	-0.547449	0.584079	0.795565
GO_ALPHA_BETA_T_CELL_DIFFERENTIATION	Y	0.0192852	40	0.0860314	0.0275323	3.12474	0.00178325	0.0179988
GO_ESTABLISHMENT_OF_PROTEIN_LOCALIZATION_TO_CHROMOSOME	Y	0.00471217	8	-0.219873	0.134744	-1.63178	0.102747	0.305746
GO_PEPTIDE_CROSS_LINKING	Y	0.011625	22	-0.0887521	0.0630349	-1.40798	0.159158	0.397724
GO_PEPTIDYL_SERINE_MODIFICATION	Y	0.0538348	136	0.0798954	0.015311	5.21817	1.83283e-07	9.47571e-06
GO_CELLULAR_RESPONSE_TO_EXTRACELLULAR_STIMULUS	Y	0.0636939	164	-0.00579231	0.0185347	-0.312512	0.754656	0.888067
GO_ROUNDABOUT_SIGNALING_PATHWAY	Y	0.00588308	10	0.0137705	0.0701714	0.196241	0.844425	0.930294
GO_ESTABLISHMENT_OF_PROTEIN_LOCALIZATION	Y	0.288031	1175	0.00991739	0.00688411	1.44062	0.149714	0.382264
GO_NEGATIVE_REGULATION_OF_RESPONSE_TO_DNA_DAMAGE_STIMULUS	Y	0.0224514	47	0.016983	0.0320762	0.529458	0.596496	0.80171
GO_GLUTAMATE_METABOLIC_PROCESS	Y	0.0130173	25	-0.0673533	0.0567009	-1.18787	0.234905	0.503461
GO_SPHINGOMYELIN_METABOLIC_PROCESS	Y	0.00637518	11	0.0500003	0.0592095	0.844464	0.398424	0.657867
GO_TRNA_METABOLIC_PROCESS	Y	0.0550809	139	-0.0928622	0.0255697	-3.63173	0.00028253	0.00445632
GO_NEGATIVE_REGULATION_OF_ATPASE_ACTIVITY	Y	0.00426986	7	-0.0915055	0.111517	-0.820555	0.411914	0.668983
GO_POSITIVE_REGULATION_OF_LOCOMOTION	Y	0.120475	366	0.0428492	0.0107712	3.97811	6.98137e-05	0.00145019
GO_REGULATION_OF_DENDRITE_MORPHOGENESIS	Y	0.0301295	68	0.091397	0.0206875	4.41799	1.00371e-05	0.000297469
GO_CELLULAR_RESPONSE_TO_LITHIUM_ION	Y	0.0083597	15	-0.0650422	0.0721391	-0.901622	0.367273	0.6327
GO_MAMMARY_GLAND_EPITHELIUM_DEVELOPMENT	Y	0.021577	45	0.043445	0.0298948	1.45326	0.146174	0.376979
GO_CELLULAR_RESPONSE_TO_PROSTAGLANDIN_STIMULUS	Y	0.0116852	22	0.0357493	0.0438162	0.815893	0.414575	0.67143
GO_REGULATION_OF_MYELOID_CELL_APOPTOTIC_PROCESS	Y	0.0106149	20	0.0900998	0.0375967	2.39648	0.0165663	0.0901556
GO_NEGATIVE_REGULATION_OF_VIRAL_PROCESS	Y	0.0310599	69	-0.0218926	0.0299177	-0.731761	0.464327	0.70959
GO_ERYTHROCYTE_HOMEOSTASIS	Y	0.027531	60	0.0443611	0.0258845	1.71381	0.086586	0.274632
GO_RESPONSE_TO_HEAT	Y	0.034068	77	0.0142185	0.0253206	0.56154	0.574439	0.787581
GO_NOTCH_RECEPTOR_PROCESSING	Y	0.00728931	13	0.0934665	0.0458135	2.04015	0.0413538	0.169553
GO_CELLULAR_RESPONSE_TO_CADMIUM_ION	Y	0.00467756	8	-0.263381	0.139883	-1.88286	0.0597397	0.215898
GO_SUCKLING_BEHAVIOR	Y	0.00733572	13	0.0758952	0.0493006	1.53944	0.12372	0.343042
GO_POSITIVE_REGULATION_OF_KIDNEY_DEVELOPMENT	Y	0.0190416	39	0.0588401	0.0303777	1.93695	0.0527715	0.198794
GO_REGULATION_OF_MITOTIC_SPINDLE_CHECKPOINT	Y	0.00521043	9	-0.236826	0.129817	-1.82431	0.0681263	0.234635
GO_I_KAPPAB_KINASE_NF_KAPPAB_SIGNALING	Y	0.0244587	52	0.0205754	0.0301498	0.682437	0.494974	0.731203
GO_REGULATION_OF_NON_CANONICAL_WNT_SIGNALING_PATHWAY	Y	0.0102233	19	0.0704154	0.0416722	1.68975	0.0910989	0.283724
GO_REGULATION_OF_KINASE_ACTIVITY	Y	0.189088	660	0.0408505	0.00822188	4.96852	6.82636e-07	3.08379e-05
GO_CHROMOSOME_LOCALIZATION_TO_NUCLEAR_ENVELOPE_INVOLVED_IN_HOMOLOGOUS_CHROMOSOME_SEGREGATION	Y	0.00429716	7	0.00617338	0.0859221	0.0718486	0.942723	0.969605
GO_NEGATIVE_REGULATION_OF_DNA_RECOMBINATION	Y	0.0078965	14	0.0228072	0.0575286	0.39645	0.691779	0.858359
GO_POSITIVE_REGULATION_OF_LYMPHOCYTE_MIGRATION	Y	0.0112217	21	0.0374132	0.0447353	0.836323	0.402987	0.660627
GO_NEGATIVE_REGULATION_OF_CELLULAR_RESPONSE_TO_INSULIN_STIMULUS	Y	0.0142941	28	0.0695821	0.0342811	2.02975	0.0424006	0.172306
GO_POSITIVE_REGULATION_OF_CELLULAR_EXTRAVASATION	Y	0.00690504	12	-0.00244756	0.0674641	-0.0362795	0.97106	0.985154
GO_MYELOID_LEUKOCYTE_DIFFERENTIATION	Y	0.036649	84	0.00921182	0.0246437	0.3738	0.708558	0.86703
GO_PEROXISOME_ORGANIZATION	Y	0.0160821	32	-0.0752005	0.05068	-1.48383	0.137877	0.364926
GO_DNA_STRAND_ELONGATION_INVOLVED_IN_DNA_REPLICATION	Y	0.0100251	19	-0.216042	0.0880597	-2.45336	0.0141649	0.0808701
GO_CELLULAR_MODIFIED_AMINO_ACID_CATABOLIC_PROCESS	Y	0.00843804	16	-0.341344	0.111455	-3.06261	0.00219832	0.0209856
GO_SINGLE_ORGANISM_CELL_ADHESION	Y	0.126751	390	0.0362559	0.010658	3.40177	0.000671371	0.00828617
GO_POLYOL_METABOLIC_PROCESS	Y	0.0351862	80	-0.00557492	0.026447	-0.210796	0.833049	0.926872
GO_POSITIVE_REGULATION_OF_TRANSCRIPTION_INITIATION_FROM_RNA_POLYMERASE_II_PROMOTER	Y	0.00740555	13	0.0085766	0.0626104	0.136984	0.891046	0.952674
GO_APICAL_JUNCTION_ASSEMBLY	Y	0.0178065	36	0.0526831	0.0322142	1.6354	0.101987	0.304979
GO_PYRIMIDINE_RIBONUCLEOSIDE_TRIPHOSPHATE_METABOLIC_PROCESS	Y	0.00727346	13	-0.166266	0.104857	-1.58564	0.112843	0.322716
GO_LYMPHOCYTE_HOMEOSTASIS	Y	0.0197124	41	0.083934	0.0274524	3.05744	0.00223658	0.0211092
GO_SERTOLI_CELL_DEVELOPMENT	Y	0.00723131	13	0.109614	0.0438307	2.50084	0.0124012	0.0736004
GO_NEGATIVE_REGULATION_OF_RNA_SPLICING	Y	0.0116389	22	0.0597233	0.0402217	1.48485	0.137605	0.364415
GO_CELL_CYCLE_PHASE_TRANSITION	Y	0.0813765	222	0.0105887	0.015177	0.697684	0.485386	0.723439
GO_TISSUE_MORPHOGENESIS	Y	0.150751	489	0.0414549	0.00943317	4.39459	1.11796e-05	0.000323098
GO_ENDOSOME_TO_LYSOSOME_TRANSPORT	Y	0.0186626	38	0.0488865	0.0318737	1.53376	0.125112	0.345746
GO_MRNA_PROCESSING	Y	0.116783	350	0.0147143	0.0120017	1.22602	0.220211	0.484564
GO_RESPONSE_TO_ANGIOTENSIN	Y	0.00788628	14	0.0376586	0.0544673	0.691398	0.489327	0.726264
GO_DENDRITIC_SPINE_DEVELOPMENT	Y	0.00957118	18	0.11362	0.0361329	3.14451	0.00166713	0.0170486
GO_REGULATION_OF_PROTEIN_OLIGOMERIZATION	Y	0.0143978	28	0.0304848	0.0397139	0.767611	0.442731	0.695682
GO_ADULT_WALKING_BEHAVIOR	Y	0.0141859	28	0.0904881	0.0321197	2.81722	0.00485092	0.038063
GO_HEME_METABOLIC_PROCESS	Y	0.00972387	18	-0.121422	0.0746324	-1.62694	0.103773	0.30716
GO_SERINE_FAMILY_AMINO_ACID_BIOSYNTHETIC_PROCESS	Y	0.00587452	10	-0.0420073	0.0830997	-0.505505	0.613212	0.813664
GO_CEREBELLAR_PURKINJE_CELL_LAYER_FORMATION	Y	0.00610446	11	0.141677	0.040824	3.47044	0.000521176	0.00692367
GO_CELLULAR_RESPONSE_TO_CARBOHYDRATE_STIMULUS	Y	0.0291713	64	-0.00446414	0.02945	-0.151584	0.879517	0.947688
GO_INOSITOL_PHOSPHATE_CATABOLIC_PROCESS	Y	0.00638605	11	0.0372673	0.0617254	0.60376	0.546013	0.768249
GO_C21_STEROID_HORMONE_METABOLIC_PROCESS	Y	0.0088715	16	-0.0263072	0.0628717	-0.418427	0.675642	0.848977
GO_NEGATIVE_REGULATION_OF_GLIAL_CELL_DIFFERENTIATION	Y	0.011996	23	0.0864207	0.0361899	2.38798	0.0169545	0.0916285
GO_POSITIVE_REGULATION_OF_SYNAPSE_ASSEMBLY	Y	0.0266935	58	0.0556441	0.0253331	2.1965	0.0280727	0.128946
GO_TRANSMISSION_OF_NERVE_IMPULSE	Y	0.0224237	48	0.0947856	0.0243182	3.89772	9.7554e-05	0.00193982
GO_POSITIVE_REGULATION_OF_VASCULATURE_DEVELOPMENT	Y	0.0475327	115	0.0267673	0.0199163	1.34399	0.178973	0.427463
GO_POSITIVE_REGULATION_OF_EPIDERMAL_CELL_DIFFERENTIATION	Y	0.00788306	14	0.0410556	0.0539592	0.760863	0.446752	0.698031
GO_MEMBRANE_FUSION	Y	0.0523224	129	0.0057181	0.0201404	0.283913	0.776481	0.898078
GO_POSITIVE_REGULATION_OF_TOR_SIGNALING	Y	0.0134945	26	-0.0463781	0.0522276	-0.888001	0.374556	0.639562
GO_POSITIVE_REGULATION_OF_GLIAL_CELL_DIFFERENTIATION	Y	0.0152737	30	0.0334104	0.0379635	0.880066	0.378839	0.642865
GO_MALE_SEX_DETERMINATION	Y	0.0063921	11	-0.0302467	0.0766027	-0.394852	0.692958	0.85877
GO_TYPE_B_PANCREATIC_CELL_DEVELOPMENT	Y	0.00564817	10	0.135487	0.0438406	3.09045	0.00200244	0.0194923
GO_REGULATION_OF_SUPEROXIDE_ANION_GENERATION	Y	0.00481631	8	-0.0676674	0.0991604	-0.682404	0.494995	0.731203
GO_ANTIGEN_RECEPTOR_MEDIATED_SIGNALING_PATHWAY	Y	0.054941	137	0.0197182	0.0186967	1.05464	0.29161	0.563949
GO_POSITIVE_REGULATION_OF_MITOTIC_CELL_CYCLE	Y	0.0455978	110	0.0547941	0.0185909	2.94736	0.00321024	0.0285844
GO_LYMPHOCYTE_COSTIMULATION	Y	0.0262526	57	0.0633509	0.0247078	2.564	0.0103575	0.065726
GO_REGULATION_OF_SERINE_TYPE_PEPTIDASE_ACTIVITY	Y	0.00371009	6	-0.125071	0.130851	-0.955833	0.339173	0.606342
GO_NEGATIVE_REGULATION_OF_STEROID_METABOLIC_PROCESS	Y	0.00933578	17	0.0417092	0.048912	0.852739	0.393818	0.654447
GO_COFACTOR_METABOLIC_PROCESS	Y	0.0927839	264	-0.0741726	0.0177237	-4.18494	2.86976e-05	0.000729671
GO_BARBED_END_ACTIN_FILAMENT_CAPPING	Y	0.00483254	8	0.0205264	0.0765778	0.268046	0.788668	0.904534
GO_CELL_MIGRATION_INVOLVED_IN_SPROUTING_ANGIOGENESIS	Y	0.00785009	14	0.0644611	0.0494062	1.30472	0.192011	0.446937
GO_REGULATION_OF_TIMING_OF_CELL_DIFFERENTIATION	Y	0.00639757	11	0.00758618	0.0682434	0.111164	0.911488	0.95802
GO_NEGATIVE_REGULATION_OF_INTRACELLULAR_ESTROGEN_RECEPTOR_SIGNALING_PATHWAY	Y	0.00588392	10	0.00845821	0.071369	0.118514	0.905662	0.956609
GO_REGULATION_OF_TYPE_2_IMMUNE_RESPONSE	Y	0.0117015	22	0.0185992	0.0465503	0.399551	0.689493	0.856913
GO_3_UTR_MEDIATED_MRNA_STABILIZATION	Y	0.00639559	11	0.017491	0.0661281	0.264502	0.791397	0.905427
GO_DRUG_CATABOLIC_PROCESS	Y	0.00428092	7	0.0527999	0.0744504	0.709196	0.478215	0.718492
GO_POSITIVE_REGULATION_OF_RHO_PROTEIN_SIGNAL_TRANSDUCTION	Y	0.00740513	13	-0.0114586	0.0666433	-0.171939	0.863488	0.940107
GO_PRIMITIVE_STREAK_FORMATION	Y	0.00535896	9	-0.0298703	0.0845784	-0.353167	0.723969	0.872961
GO_RESPONSE_TO_PHENYLPROPANOID	Y	0.00428575	7	-0.0557709	0.102576	-0.543706	0.586652	0.797224
GO_REGULATION_OF_EPITHELIAL_CELL_MIGRATION	Y	0.0575693	146	0.0540842	0.0161374	3.35149	0.000805902	0.00959044
GO_POSITIVE_REGULATION_OF_NOTCH_SIGNALING_PATHWAY	Y	0.015721	31	0.026129	0.0382817	0.682545	0.494906	0.731203
GO_CELL_DEATH	Y	0.225749	836	0.0230412	0.00775572	2.97086	0.00297468	0.0268761
GO_SOMATIC_RECOMBINATION_OF_IMMUNOGLOBULIN_GENES_INVOLVED_IN_IMMUNE_RESPONSE	Y	0.00678299	12	-0.165866	0.0997966	-1.66204	0.0965271	0.29394
GO_CELLULAR_IRON_ION_HOMEOSTASIS	Y	0.0178887	36	-0.00827305	0.0396936	-0.208422	0.834902	0.927381
GO_CONTRACTILE_ACTIN_FILAMENT_BUNDLE_ASSEMBLY	Y	0.00724043	13	0.107353	0.0417687	2.57018	0.0101749	0.0653018
GO_MACROMOLECULE_DEACYLATION	Y	0.0282282	62	0.057206	0.0243467	2.34964	0.0188052	0.0989749
GO_TRANSLATIONAL_INITIATION	Y	0.0343001	78	-0.0606188	0.0315851	-1.91922	0.0549767	0.205302
GO_ACTIVATION_OF_NF_KAPPAB_INDUCING_KINASE_ACTIVITY	Y	0.00839147	15	-0.00958088	0.0617054	-0.155268	0.876612	0.947688
GO_SYNAPTIC_TRANSMISSION_CHOLINERGIC	Y	0.0135084	26	-0.0335208	0.0504573	-0.664341	0.506483	0.739479
GO_NEGATIVE_REGULATION_OF_CYTOKINE_PRODUCTION_INVOLVED_IN_IMMUNE_RESPONSE	Y	0.00887689	16	-0.0108826	0.0599771	-0.181447	0.85602	0.936375
GO_REGULATION_OF_TOLL_LIKE_RECEPTOR_4_SIGNALING_PATHWAY	Y	0.00839109	15	0.0109671	0.0578071	0.189718	0.849533	0.932722
GO_POSITIVE_REGULATION_OF_CELLULAR_PROTEIN_LOCALIZATION	Y	0.104721	305	0.0237993	0.0124711	1.90836	0.0563656	0.20815
GO_PLASMA_MEMBRANE_ORGANIZATION	Y	0.0682171	179	0.0363758	0.0155121	2.345	0.0190409	0.0989993
GO_REGULATION_OF_NEUROTRANSMITTER_SECRETION	Y	0.0228224	48	0.0346188	0.0299006	1.1578	0.246967	0.518888
GO_POSITIVE_REGULATION_OF_PROTEIN_CATABOLIC_PROCESS	Y	0.0783469	212	0.0233095	0.0149109	1.56325	0.118016	0.332603
GO_ACTIVATION_OF_ADENYLATE_CYCLASE_ACTIVITY	Y	0.0152611	30	0.0401626	0.0371177	1.08203	0.279257	0.553631
GO_WHITE_FAT_CELL_DIFFERENTIATION	Y	0.00688162	12	0.0486885	0.0570374	0.853625	0.393328	0.654447
GO_OOGENESIS	Y	0.0243548	52	-0.0672547	0.0389838	-1.7252	0.0845138	0.270084
GO_ANTERIOR_POSTERIOR_AXIS_SPECIFICATION_EMBRYO	Y	0.00689941	12	0.0252716	0.0617022	0.409574	0.682125	0.85221
GO_REGULATION_OF_SHORT_TERM_NEURONAL_SYNAPTIC_PLASTICITY	Y	0.00731179	13	0.0856915	0.0466765	1.83586	0.0663994	0.231255
GO_ALDEHYDE_CATABOLIC_PROCESS	Y	0.00520444	9	-0.243521	0.132128	-1.84307	0.0653405	0.228938
GO_RESPONSE_TO_TYPE_I_INTERFERON	Y	0.0187216	38	-0.0264067	0.0407622	-0.647824	0.517109	0.746081
GO_MITOCHONDRIAL_RESPIRATORY_CHAIN_COMPLEX_ASSEMBLY	Y	0.0195382	41	-0.176068	0.0548815	-3.20814	0.00133895	0.0143883
GO_HYALURONAN_CATABOLIC_PROCESS	Y	0.00685841	12	-0.0910152	0.0858673	-1.05995	0.289185	0.562154
GO_NEUROTRANSMITTER_BIOSYNTHETIC_PROCESS	Y	0.00738237	13	0.0473086	0.0551762	0.857408	0.391234	0.65318
GO_PENTOSE_PHOSPHATE_SHUNT	Y	0.00681631	12	-0.134906	0.0978351	-1.37891	0.167944	0.411697
GO_CYTOKINE_MEDIATED_SIGNALING_PATHWAY	Y	0.108852	320	-0.0143106	0.0136791	-1.04616	0.295505	0.57006
GO_ATP_GENERATION_FROM_ADP	Y	0.0156849	31	-0.0560884	0.0490387	-1.14376	0.252743	0.525049
GO_NEGATIVE_REGULATION_OF_LOCOMOTION	Y	0.0819844	227	0.0666908	0.0124991	5.33567	9.66768e-08	5.3552e-06
GO_IMP_METABOLIC_PROCESS	Y	0.00588012	10	-0.0268757	0.0794548	-0.338252	0.735179	0.878431
GO_NCRNA_3_END_PROCESSING	Y	0.00790183	14	0.000433797	0.0618995	0.00700809	0.994408	0.997625
GO_LYMPH_NODE_DEVELOPMENT	Y	0.00737089	13	0.0563597	0.0541526	1.04076	0.298006	0.571395
GO_REGULATION_OF_CELLULAR_COMPONENT_SIZE	Y	0.102022	298	0.0605354	0.0112255	5.39268	7.05412e-08	4.15479e-06
GO_FERRIC_IRON_TRANSPORT	Y	0.0177036	36	-0.108227	0.0521097	-2.07692	0.0378276	0.158855
GO_MITOCHONDRIAL_TRANSPORT	Y	0.0565147	142	-0.0361783	0.021779	-1.66116	0.0967047	0.294288
GO_SULFUR_COMPOUND_BIOSYNTHETIC_PROCESS	Y	0.0654255	170	-0.04158	0.0202115	-2.05724	0.0396816	0.163687
GO_T_CELL_PROLIFERATION	Y	0.0165653	33	0.038914	0.0355832	1.0936	0.274147	0.547471
GO_NEGATIVE_REGULATION_OF_GLYCOLYTIC_PROCESS	Y	0.00529084	9	0.0895309	0.0558244	1.6038	0.108781	0.31635
GO_REGULATION_OF_RESPIRATORY_GASEOUS_EXCHANGE_BY_NEUROLOGICAL_SYSTEM_PROCESS	Y	0.0071973	13	0.117368	0.0430159	2.72848	0.00637069	0.0461726
GO_PROTEIN_TARGETING	Y	0.10429	303	-0.00773745	0.0137804	-0.561481	0.574479	0.787581
GO_POSITIVE_REGULATION_OF_CHOLESTEROL_EFFLUX	Y	0.00481455	8	0.0548299	0.068273	0.803098	0.421932	0.676749
GO_SINGLE_ORGANISM_BIOSYNTHETIC_PROCESS	Y	0.2693	1073	-0.0429502	0.0082625	-5.19821	2.04051e-07	1.04335e-05
GO_POSITIVE_REGULATION_OF_VIRAL_GENOME_REPLICATION	Y	0.012605	24	0.0306835	0.0428067	0.716793	0.473514	0.71488
GO_NEGATIVE_REGULATION_OF_INNATE_IMMUNE_RESPONSE	Y	0.0121483	23	0.031853	0.0435421	0.731546	0.464458	0.70959
GO_REGULATION_OF_ALPHA_AMINO_3_HYDROXY_5_METHYL_4_ISOXAZOLE_PROPIONATE_SELECTIVE_GLUTAMATE_RECEPTOR_ACTIVITY	Y	0.00934481	17	0.0333991	0.0502942	0.664075	0.506654	0.739479
GO_REGULATION_OF_ENDOTHELIAL_CELL_DIFFERENTIATION	Y	0.0107711	20	0.0230757	0.0480948	0.479796	0.63138	0.823378
GO_REGULATION_OF_NOREPINEPHRINE_SECRETION	Y	0.00786096	14	-0.076951	0.0764308	-1.00681	0.314046	0.585324
GO_GLIAL_CELL_DEVELOPMENT	Y	0.0290853	64	0.0413847	0.0253835	1.63038	0.103044	0.305958
GO_MITOCHONDRIAL_TRANSLATION	Y	0.0315103	72	-0.161438	0.0408746	-3.94958	7.86713e-05	0.00161259
GO_REGULATION_OF_RETINOIC_ACID_RECEPTOR_SIGNALING_PATHWAY	Y	0.00677801	12	0.099774	0.0488116	2.04406	0.0409661	0.168388
GO_STRIATED_MUSCLE_CELL_DIFFERENTIATION	Y	0.0571829	146	0.0745624	0.0151156	4.9328	8.19879e-07	3.59896e-05
GO_REGULATION_OF_SYSTEMIC_ARTERIAL_BLOOD_PRESSURE	Y	0.0310791	69	-0.00420774	0.0283447	-0.148449	0.881991	0.949099
GO_REGULATION_OF_SMOOTH_MUSCLE_CONTRACTION	Y	0.0256649	55	0.00549476	0.0307789	0.178524	0.858314	0.937436
GO_POLYOL_CATABOLIC_PROCESS	Y	0.00983047	18	0.0213698	0.0510049	0.418975	0.675241	0.848783
GO_SECOND_MESSENGER_MEDIATED_SIGNALING	Y	0.0539492	135	0.056962	0.0166646	3.41815	0.000632283	0.00790864
GO_CELL_CELL_SIGNALING	Y	0.180648	618	0.0181617	0.00904899	2.00704	0.0447648	0.178497
GO_NEGATIVE_REGULATION_OF_B_CELL_ACTIVATION	Y	0.0135203	26	-0.0177203	0.0480618	-0.368698	0.712358	0.869177
GO_POSITIVE_REGULATION_OF_COAGULATION	Y	0.011238	21	0.0209188	0.0472847	0.442402	0.658205	0.838846
GO_NEGATIVE_REGULATION_OF_PROTEIN_TYROSINE_KINASE_ACTIVITY	Y	0.00983519	18	0.01005	0.052943	0.189826	0.849448	0.932722
GO_LUNG_MORPHOGENESIS	Y	0.0203218	42	0.0501534	0.0302058	1.66039	0.0968581	0.29437
GO_VENTRICULAR_CARDIAC_MUSCLE_CELL_DIFFERENTIATION	Y	0.00982357	18	0.0307149	0.0493385	0.622533	0.533601	0.75789
GO_OXIDATIVE_DEMETHYLATION	Y	0.00426032	7	0.0750721	0.0692371	1.08427	0.278262	0.553066
GO_REGULATION_OF_MACROPHAGE_ACTIVATION	Y	0.0121192	23	0.0496659	0.0409759	1.21207	0.225505	0.490085
GO_VASCULAR_ENDOTHELIAL_GROWTH_FACTOR_RECEPTOR_SIGNALING_PATHWAY	Y	0.0313453	70	0.0447891	0.023904	1.87371	0.060991	0.219313
GO_POSITIVE_REGULATION_OF_MAPK_CASCADE	Y	0.128123	395	0.0310007	0.0107717	2.87798	0.00400833	0.033605
GO_RESPONSE_TO_MORPHINE	Y	0.0130657	25	0.022682	0.0430829	0.526472	0.598569	0.80171
GO_MULTICELLULAR_ORGANISMAL_MACROMOLECULE_METABOLIC_PROCESS	Y	0.0310794	69	0.00348735	0.0276701	0.126033	0.899708	0.955731
GO_CARBOHYDRATE_DERIVATIVE_CATABOLIC_PROCESS	Y	0.0562192	141	-0.0300158	0.0214679	-1.39817	0.162084	0.402871
GO_L_AMINO_ACID_TRANSPORT	Y	0.0251787	54	0.045763	0.0270795	1.68995	0.0910602	0.283724
GO_POSITIVE_REGULATION_OF_ACTION_POTENTIAL	Y	0.00588173	10	0.0192943	0.0689051	0.280013	0.779472	0.899468
GO_REGULATION_OF_MUSCLE_CONTRACTION	Y	0.0509494	125	0.0199422	0.0195584	1.01962	0.307927	0.579839
GO_REGULATION_OF_CHOLESTEROL_EFFLUX	Y	0.00740595	13	0.00541879	0.0632259	0.0857052	0.931702	0.966386
GO_REGULATION_OF_EXOCYTOSIS	Y	0.0614657	157	0.00656768	0.0182277	0.360314	0.718618	0.870843
GO_NEGATIVE_REGULATION_OF_TOLL_LIKE_RECEPTOR_SIGNALING_PATHWAY	Y	0.0121629	23	0.014122	0.0462171	0.305559	0.759945	0.890462
GO_ANION_TRANSMEMBRANE_TRANSPORT	Y	0.076029	204	-0.00659328	0.0166812	-0.395252	0.692663	0.858769
GO_POSITIVE_REGULATION_OF_PROTEIN_LOCALIZATION_TO_CELL_SURFACE	Y	0.00639644	11	-0.01508	0.0732332	-0.205918	0.836858	0.928003
GO_PROTEIN_MODIFICATION_BY_SMALL_PROTEIN_CONJUGATION_OR_REMOVAL	Y	0.201419	720	0.0463771	0.00778196	5.95957	2.58976e-09	1.97544e-07
GO_RENAL_VESICLE_DEVELOPMENT	Y	0.00736524	13	0.0601455	0.0520807	1.15485	0.24817	0.519683
GO_REGULATION_OF_BODY_FLUID_LEVELS	Y	0.133166	414	0.00263637	0.0114743	0.229763	0.818279	0.919536
GO_REGULATION_OF_HORMONE_LEVELS	Y	0.126526	388	0.0193256	0.0112575	1.71669	0.0860576	0.273515
GO_BONE_CELL_DEVELOPMENT	Y	0.010664	20	0.0778006	0.039832	1.95322	0.0508138	0.193801
GO_REGULATION_OF_DEFENSE_RESPONSE	Y	0.171878	578	-0.00898434	0.010106	-0.889012	0.374012	0.638869
GO_NEGATIVE_REGULATION_OF_NEUROLOGICAL_SYSTEM_PROCESS	Y	0.00639188	11	0.0272922	0.0639703	0.426638	0.669649	0.845328
GO_PYRIMIDINE_NUCLEOSIDE_MONOPHOSPHATE_METABOLIC_PROCESS	Y	0.00579585	10	-0.151419	0.106229	-1.4254	0.154063	0.388824
GO_POSITIVE_REGULATION_OF_HEART_GROWTH	Y	0.0129494	25	0.0735843	0.0355973	2.06713	0.0387404	0.161233
GO_NEGATIVE_REGULATION_OF_LIPID_BIOSYNTHETIC_PROCESS	Y	0.0170297	34	0.0152367	0.0378982	0.402043	0.687658	0.855757
GO_NEGATIVE_REGULATION_OF_PEPTIDE_SECRETION	Y	0.0199538	41	0.0355657	0.0322673	1.10222	0.270384	0.543242
GO_VESICLE_TARGETING	Y	0.0325825	73	0.00976032	0.0263707	0.370119	0.711299	0.868681
GO_REGULATION_OF_PROTEIN_EXPORT_FROM_NUCLEUS	Y	0.013922	27	0.0478612	0.0380905	1.25651	0.208951	0.470366
GO_HEXOSE_TRANSMEMBRANE_TRANSPORT	Y	0.00789648	14	-0.025276	0.0668873	-0.377889	0.705519	0.865775
GO_LAYER_FORMATION_IN_CEREBRAL_CORTEX	Y	0.0076761	14	0.117535	0.0431886	2.72144	0.00650791	0.0468751
GO_POSITIVE_REGULATION_OF_ACTIN_CYTOSKELETON_REORGANIZATION	Y	0.00736389	13	-0.0819757	0.0818332	-1.00174	0.316486	0.587165
GO_SEX_DETERMINATION	Y	0.0102971	19	-0.033644	0.0588247	-0.571936	0.567374	0.785126
GO_NEGATIVE_REGULATION_OF_CHOLESTEROL_TRANSPORT	Y	0.00516082	9	-0.291893	0.145463	-2.00665	0.0448063	0.178497
GO_OLIGOSACCHARIDE_CATABOLIC_PROCESS	Y	0.0063323	11	-0.117977	0.0960917	-1.22776	0.219559	0.484564
GO_B_CELL_PROLIFERATION	Y	0.0116784	22	0.0405244	0.0430903	0.940452	0.347002	0.610414
GO_POSITIVE_REGULATION_OF_DNA_METABOLIC_PROCESS	Y	0.0588428	149	0.0224783	0.0177825	1.26407	0.206226	0.467209
GO_PROTEASOME_ASSEMBLY	Y	0.0046809	8	-0.259213	0.142382	-1.82055	0.0686971	0.235728
GO_ESTABLISHMENT_OF_PROTEIN_LOCALIZATION_TO_ENDOPLASMIC_RETICULUM	Y	0.0224747	48	-0.143802	0.0493679	-2.91286	0.00358696	0.0308843
GO_PYRIMIDINE_NUCLEOSIDE_TRIPHOSPHATE_BIOSYNTHETIC_PROCESS	Y	0.00824786	15	-0.159989	0.0939576	-1.70278	0.0886317	0.279479
GO_GLUCOSE_HOMEOSTASIS	Y	0.0588968	149	0.00216567	0.0189643	0.114197	0.909083	0.957655
GO_NEGATIVE_REGULATION_OF_ENDOCYTOSIS	Y	0.0148554	29	0.0143595	0.0411418	0.349025	0.727076	0.873802
GO_RESPONSE_TO_POTASSIUM_ION	Y	0.00639687	11	0.0121486	0.0672692	0.180596	0.856687	0.936688
GO_REGULATION_OF_LYMPHOCYTE_APOPTOTIC_PROCESS	Y	0.0199923	41	-0.00800686	0.0371717	-0.215402	0.829457	0.924201
GO_SMALL_MOLECULE_METABOLIC_PROCESS	Y	0.323125	1394	-0.033685	0.00713831	-4.7189	2.39419e-06	8.98401e-05
GO_THYMUS_DEVELOPMENT	Y	0.0195348	41	0.102346	0.0255445	4.00657	6.1924e-05	0.00132573
GO_NEGATIVE_REGULATION_OF_ADHERENS_JUNCTION_ORGANIZATION	Y	0.00877559	16	0.0813899	0.042998	1.89288	0.0583948	0.213508
GO_HOMEOSTATIC_PROCESS	Y	0.271936	1082	0.00206218	0.0072958	0.282653	0.777447	0.898524
GO_CEREBELLAR_CORTEX_MORPHOGENESIS	Y	0.0151336	30	0.0766006	0.0325235	2.35524	0.0185243	0.0983947
GO_POSITIVE_REGULATION_OF_CYTOPLASMIC_TRANSPORT	Y	0.085156	235	0.015894	0.0145143	1.09506	0.27351	0.546788
GO_MORPHOGENESIS_OF_AN_EPITHELIUM	Y	0.119937	364	0.0437396	0.0107566	4.06631	4.80253e-05	0.0011008
GO_OSTEOBLAST_DIFFERENTIATION	Y	0.0465587	112	0.00840596	0.0214187	0.392459	0.694725	0.859452
GO_REGULATION_OF_STRIATED_MUSCLE_CELL_DIFFERENTIATION	Y	0.0309421	69	0.0493012	0.0236763	2.0823	0.037333	0.157489
GO_DEFENSE_RESPONSE_TO_VIRUS	Y	0.0455178	109	-0.0127752	0.0231741	-0.551268	0.581459	0.793158
GO_SENSORY_PERCEPTION_OF_CHEMICAL_STIMULUS	Y	0.0382422	91	-0.168404	0.0394612	-4.26759	1.98899e-05	0.000531883
GO_REGULATION_OF_RUFFLE_ASSEMBLY	Y	0.0107633	20	-0.0368735	0.0578714	-0.637163	0.524029	0.74967
GO_CELLULAR_PIGMENTATION	Y	0.0203877	42	-0.0295282	0.0391669	-0.753908	0.450917	0.700968
GO_NEGATIVE_REGULATION_OF_CALCIUM_ION_DEPENDENT_EXOCYTOSIS	Y	0.00509169	9	0.148098	0.0434494	3.40851	0.000655034	0.00812766
GO_VACUOLAR_TRANSPORT	Y	0.0803972	219	0.0263207	0.0145312	1.81132	0.070113	0.239413
GO_NEGATIVE_REGULATION_OF_CELL_CELL_ADHESION	Y	0.0448327	107	0.00631187	0.0220544	0.286195	0.774733	0.89694
GO_PROTEIN_ALPHA_1_2_DEMANNOSYLATION	Y	0.00664881	12	0.13059	0.0390609	3.34325	0.000830197	0.00975481
GO_POSITIVE_REGULATION_OF_VIRAL_RELEASE_FROM_HOST_CELL	Y	0.00690435	12	-0.00978069	0.0690162	-0.141716	0.887307	0.952674
GO_LEUKOCYTE_MEDIATED_CYTOTOXICITY	Y	0.0121259	23	-0.0574837	0.0567805	-1.01239	0.311371	0.584134
GO_POSITIVE_REGULATION_OF_VACUOLAR_TRANSPORT	Y	0.0063668	11	0.0574278	0.057358	1.00122	0.316739	0.587177
GO_POSITIVE_REGULATION_OF_LYASE_ACTIVITY	Y	0.0232662	49	0.0116431	0.0319681	0.364211	0.715706	0.869499
GO_POSITIVE_REGULATION_OF_IMMUNE_RESPONSE_TO_TUMOR_CELL	Y	0.00482702	8	-0.0421345	0.0926624	-0.45471	0.649325	0.834385
GO_ENTRAINMENT_OF_CIRCADIAN_CLOCK_BY_PHOTOPERIOD	Y	0.00983534	18	0.00945837	0.0530362	0.178338	0.85846	0.937436
GO_SUPEROXIDE_METABOLIC_PROCESS	Y	0.0102962	19	0.0304343	0.0480991	0.632742	0.526913	0.75284
GO_ORGANIC_HYDROXY_COMPOUND_METABOLIC_PROCESS	Y	0.124295	379	-0.0128385	0.0125411	-1.02371	0.305989	0.577969
GO_TELOMERE_MAINTENANCE_VIA_TELOMERE_LENGTHENING	Y	0.0102409	19	-0.0871212	0.0677953	-1.28506	0.198791	0.456895
GO_PHOTOTRANSDUCTION	Y	0.0152969	30	-0.0115911	0.043924	-0.263889	0.791869	0.905744
GO_REGULATION_OF_LIGASE_ACTIVITY	Y	0.0398887	93	-0.0159688	0.0253255	-0.630543	0.52835	0.753652
GO_REGULATION_OF_OXIDOREDUCTASE_ACTIVITY	Y	0.032206	72	-0.0114791	0.0283791	-0.404491	0.685858	0.854794
GO_SULFATE_TRANSPORT	Y	0.00518322	9	-0.267109	0.136442	-1.95767	0.0502888	0.192429
GO_RESPONSE_TO_FOOD	Y	0.00887577	16	0.0143514	0.0553676	0.259201	0.795484	0.90698
GO_REGULATION_OF_PROTEIN_INSERTION_INTO_MITOCHONDRIAL_MEMBRANE_INVOLVED_IN_APOPTOTIC_SIGNALING_PATHWAY	Y	0.0134464	26	0.0592079	0.0372291	1.59037	0.111775	0.320499
GO_TELOMERE_ORGANIZATION	Y	0.0278957	61	-0.0610707	0.035552	-1.71779	0.0858579	0.27319
GO_ANTEROGRADE_SYNAPTIC_VESICLE_TRANSPORT	Y	0.00638429	11	0.0396941	0.0611955	0.648644	0.516579	0.745765
GO_IMMUNE_SYSTEM_DEVELOPMENT	Y	0.151684	492	0.0338003	0.00962193	3.51284	0.000444739	0.00619572
GO_CAMP_BIOSYNTHETIC_PROCESS	Y	0.00788483	14	0.0392341	0.054518	0.719654	0.47175	0.714071
GO_ALPHA_AMINO_ACID_CATABOLIC_PROCESS	Y	0.0354718	82	-0.1123	0.0351011	-3.19934	0.00138051	0.0147329
GO_CELLULAR_COMPONENT_MAINTENANCE	Y	0.0088672	16	-0.0343429	0.0643171	-0.533962	0.593376	0.800003
GO_REGULATION_OF_CARDIAC_MUSCLE_CELL_CONTRACTION	Y	0.0132601	26	0.0984439	0.0321732	3.05981	0.00221898	0.0209856
GO_FC_GAMMA_RECEPTOR_SIGNALING_PATHWAY	Y	0.0314355	70	0.0211874	0.0259374	0.816868	0.414018	0.670905
GO_RRNA_METABOLIC_PROCESS	Y	0.0611578	158	-0.0928786	0.0240624	-3.85991	0.000113938	0.00221821
GO_RESPIRATORY_SYSTEM_PROCESS	Y	0.00689929	12	-0.0286011	0.0729827	-0.391889	0.695146	0.859452
GO_NEUROTRANSMITTER_TRANSPORT	Y	0.0549212	137	0.0240785	0.0184279	1.30663	0.191359	0.446076
GO_REGULATION_OF_T_HELPER_CELL_DIFFERENTIATION	Y	0.0121525	23	0.0281033	0.0441098	0.637122	0.524056	0.74967
GO_REGULATION_OF_VOLTAGE_GATED_CALCIUM_CHANNEL_ACTIVITY	Y	0.0101418	19	0.0928319	0.0391529	2.37101	0.017753	0.0947302
GO_PH_REDUCTION	Y	0.0177515	36	-0.0905794	0.0494581	-1.83144	0.0670567	0.232673
GO_POSITIVE_REGULATION_OF_TRIGLYCERIDE_LIPASE_ACTIVITY	Y	0.00369004	6	-0.162911	0.140645	-1.15831	0.246758	0.518888
GO_MONOSACCHARIDE_CATABOLIC_PROCESS	Y	0.0220306	46	-0.0293453	0.0373873	-0.784902	0.432524	0.687357
GO_POSITIVE_REGULATION_OF_MRNA_METABOLIC_PROCESS	Y	0.0194944	40	0.0499254	0.0312125	1.59953	0.109725	0.317506
GO_RESPONSE_TO_FUNGICIDE	Y	0.00588179	10	0.0191075	0.0690239	0.276825	0.781919	0.900338
GO_NEGATIVE_REGULATION_BY_HOST_OF_VIRAL_TRANSCRIPTION	Y	0.00625706	11	0.107525	0.0492988	2.18108	0.0291939	0.132354
GO_REGULATION_OF_EPIDERMAL_GROWTH_FACTOR_ACTIVATED_RECEPTOR_ACTIVITY	Y	0.0112356	21	0.0241449	0.0468045	0.515867	0.605956	0.808801
GO_PROTEIN_NEDDYLATION	Y	0.00639543	11	-0.0195324	0.0743401	-0.262743	0.792752	0.906282
GO_POTASSIUM_ION_HOMEOSTASIS	Y	0.00832615	15	0.0695641	0.0474928	1.46473	0.143017	0.372806
GO_HORMONE_TRANSPORT	Y	0.0303161	67	0.00929308	0.0275605	0.337188	0.73598	0.878431
GO_PROTEIN_CATABOLIC_PROCESS	Y	0.14785	476	0.0355034	0.00971393	3.65489	0.000258231	0.00416463
GO_POSITIVE_REGULATION_OF_INTRACELLULAR_STEROID_HORMONE_RECEPTOR_SIGNALING_PATHWAY	Y	0.00681647	12	0.0862678	0.048657	1.77298	0.0762541	0.251639
GO_NEGATIVE_REGULATION_OF_MYOTUBE_DIFFERENTIATION	Y	0.00838684	15	0.0224094	0.0556031	0.403025	0.686936	0.855544
GO_INORGANIC_ANION_TRANSPORT	Y	0.0417677	99	-0.0736313	0.028767	-2.55958	0.0104904	0.0663673
GO_CARBOHYDRATE_PHOSPHORYLATION	Y	0.00983498	18	-0.011347	0.0566296	-0.200372	0.841193	0.928897
GO_PROTEIN_IMPORT	Y	0.0522902	129	-0.0212125	0.0218732	-0.969793	0.332166	0.602796
GO_NUCLEOSIDE_BISPHOSPHATE_METABOLIC_PROCESS	Y	0.0152157	30	-0.0749662	0.0526944	-1.42266	0.154857	0.389909
GO_REGULATION_OF_INTRACELLULAR_STEROID_HORMONE_RECEPTOR_SIGNALING_PATHWAY	Y	0.0243765	52	0.0480237	0.0274656	1.7485	0.0803988	0.261039
GO_MAMMARY_GLAND_EPITHELIAL_CELL_DIFFERENTIATION	Y	0.00681612	12	0.0864077	0.0490267	1.76246	0.0780135	0.256217
GO_CELLULAR_RESPONSE_TO_GAMMA_RADIATION	Y	0.00838291	15	0.0289206	0.0543747	0.531876	0.59482	0.800607
GO_REGULATION_OF_HEAT_GENERATION	Y	0.00790182	14	0.000888421	0.0618105	0.0143733	0.988532	0.993872
GO_REGULATION_OF_FIBROBLAST_MIGRATION	Y	0.0125851	24	0.0437917	0.040997	1.06817	0.285462	0.55856
GO_INDUCTION_OF_POSITIVE_CHEMOTAXIS	Y	0.00588169	10	0.0194409	0.0688685	0.282291	0.777725	0.898622
GO_REGENERATION	Y	0.0542945	135	0.016012	0.0190588	0.840135	0.400847	0.65998
GO_NEGATIVE_REGULATION_OF_CARDIAC_MUSCLE_TISSUE_GROWTH	Y	0.00637632	11	-0.0614842	0.0838689	-0.733098	0.463511	0.70959
GO_EXTRINSIC_APOPTOTIC_SIGNALING_PATHWAY	Y	0.0355015	81	0.0298457	0.0234564	1.27239	0.203256	0.46355
GO_KILLING_OF_CELLS_OF_OTHER_ORGANISM	Y	0.00481596	8	0.0531173	0.0689359	0.770531	0.440998	0.69398
GO_NUCLEOTIDE_EXCISION_REPAIR_DNA_INCISION_3_TO_LESION	Y	0.0092794	17	-0.101991	0.0746635	-1.36601	0.171959	0.417821
GO_REGULATION_OF_TRANSLATIONAL_ELONGATION	Y	0.00934298	17	0.0352827	0.0502046	0.702778	0.482206	0.720521
GO_CELL_MATRIX_ADHESION	Y	0.0447772	107	0.0271307	0.0206189	1.31581	0.188258	0.442158
GO_PITUITARY_GLAND_DEVELOPMENT	Y	0.0187286	38	-0.0194472	0.0400153	-0.485993	0.62698	0.821627
GO_MATING	Y	0.0143691	28	0.0460772	0.0375087	1.22844	0.219303	0.484564
GO_DEVELOPMENTAL_INDUCTION	Y	0.0125744	24	0.049076	0.0401094	1.22356	0.22114	0.484813
GO_RESPONSE_TO_MITOCHONDRIAL_DEPOLARISATION	Y	0.0455283	109	-0.00296489	0.022496	-0.131796	0.895148	0.954427
GO_REGULATION_OF_TRANSFERASE_ACTIVITY	Y	0.214462	781	0.033531	0.00777236	4.31413	1.6133e-05	0.00044157
GO_NEGATIVE_REGULATION_OF_ALCOHOL_BIOSYNTHETIC_PROCESS	Y	0.00790175	14	0.00291594	0.0614142	0.0474799	0.962131	0.980679
GO_CHROMOSOME_SEPARATION	Y	0.0102676	19	-0.0655853	0.0644581	-1.01749	0.308939	0.581276
GO_GANGLIOSIDE_METABOLIC_PROCESS	Y	0.0129066	25	0.0831767	0.0346507	2.40043	0.0163886	0.089819
GO_TISSUE_HOMEOSTASIS	Y	0.0546443	136	-0.00749709	0.02044	-0.366785	0.713785	0.869393
GO_ANTIGEN_PROCESSING_AND_PRESENTATION_VIA_MHC_CLASS_IB	Y	0.00316528	5	-0.104113	0.136057	-0.765212	0.444158	0.695682
GO_DNA_METHYLATION	Y	0.0195388	40	0.0351099	0.03274	1.07239	0.283565	0.557407
GO_GAMMA_AMINOBUTYRIC_ACID_SIGNALING_PATHWAY	Y	0.0112042	21	0.0483821	0.0429514	1.12644	0.259999	0.534589
GO_POSITIVE_REGULATION_OF_STEROL_TRANSPORT	Y	0.00535584	9	0.0336322	0.0692867	0.485406	0.627396	0.821627
GO_ACETYLCHOLINE_RECEPTOR_SIGNALING_PATHWAY	Y	0.00885513	16	0.0423491	0.0505286	0.83812	0.401977	0.65998
GO_ADAPTIVE_IMMUNE_RESPONSE_BASED_ON_SOMATIC_RECOMBINATION_OF_IMMUNE_RECEPTORS_BUILT_FROM_IMMUNOGLOBULIN_SUPERFAMILY_DOMAINS	Y	0.0405988	95	-0.0175012	0.0251799	-0.695047	0.487038	0.724947
GO_CELL_CYCLE_ARREST	Y	0.0540645	135	0.048199	0.017137	2.81257	0.00492159	0.0385524
GO_THYROID_HORMONE_METABOLIC_PROCESS	Y	0.0063979	11	0.00374991	0.0690914	0.0542746	0.956717	0.97773
GO_APOPTOTIC_CELL_CLEARANCE	Y	0.0117067	22	-0.00442165	0.05015	-0.0881686	0.929744	0.965756
GO_MODIFICATION_OF_MORPHOLOGY_OR_PHYSIOLOGY_OF_OTHER_ORGANISM	Y	0.032433	73	0.0505862	0.0231053	2.18938	0.0285859	0.130402
GO_RIBOSOME_ASSEMBLY	Y	0.0130576	25	-0.0348495	0.0515501	-0.676031	0.499032	0.733416
GO_NEGATIVE_REGULATION_OF_ACTIN_FILAMENT_DEPOLYMERIZATION	Y	0.0129922	25	0.0615403	0.0376388	1.63502	0.102067	0.30502
GO_DNA_LIGATION_INVOLVED_IN_DNA_REPAIR	Y	0.00481476	8	-0.0708126	0.10057	-0.704112	0.481375	0.720267
GO_REGULATION_OF_CELL_JUNCTION_ASSEMBLY	Y	0.0280082	62	0.0813472	0.0221027	3.68042	0.000233726	0.00388403
GO_HYPEROSMOTIC_RESPONSE	Y	0.00933397	17	-0.0526856	0.065521	-0.804102	0.421352	0.676749
GO_REGULATION_OF_SMAD_PROTEIN_IMPORT_INTO_NUCLEUS	Y	0.00583315	10	0.0741087	0.0575908	1.28681	0.19818	0.455824
GO_NEGATIVE_REGULATION_OF_NATURAL_KILLER_CELL_MEDIATED_IMMUNITY	Y	0.00307609	5	0.133395	0.0630573	2.11546	0.0344081	0.149348
GO_ARTERY_DEVELOPMENT	Y	0.032012	72	0.0571042	0.0225707	2.53002	0.0114164	0.0698628
GO_PROTEIN_DEALKYLATION	Y	0.014819	29	0.0419337	0.0374985	1.11827	0.263469	0.536743
GO_NEGATIVE_REGULATION_OF_DENDRITE_MORPHOGENESIS	Y	0.00838488	15	0.0258939	0.0550396	0.470459	0.638034	0.828013
GO_NEGATIVE_REGULATION_OF_TYPE_I_INTERFERON_PRODUCTION	Y	0.0161674	32	0.0139554	0.0392226	0.355801	0.721995	0.872129
GO_EXTRACELLULAR_MATRIX_ASSEMBLY	Y	0.00838825	15	0.0194679	0.0561865	0.346487	0.728982	0.874365
GO_POSTREPLICATION_REPAIR	Y	0.0191517	39	0.0152034	0.0354125	0.429324	0.667694	0.844708
GO_SKELETAL_SYSTEM_DEVELOPMENT	Y	0.130513	405	0.0365465	0.0104655	3.4921	0.000480723	0.00659825
GO_ORGANOPHOSPHATE_METABOLIC_PROCESS	Y	0.201276	715	-0.0254464	0.00956291	-2.66094	0.00780113	0.0533042
GO_CARDIAC_MYOFIBRIL_ASSEMBLY	Y	0.00729707	13	0.0909087	0.0481236	1.88907	0.0589037	0.214459
GO_REGULATION_OF_HEART_CONTRACTION	Y	0.0704019	186	0.0335993	0.015391	2.18305	0.0290486	0.131995
GO_CELLULAR_AMINO_ACID_BIOSYNTHETIC_PROCESS	Y	0.0314821	71	-0.105692	0.0368186	-2.87062	0.00410286	0.033969
GO_CRANIAL_NERVE_MORPHOGENESIS	Y	0.011695	22	0.027021	0.0452711	0.59687	0.550604	0.772838
GO_ACTIVATION_OF_JUN_KINASE_ACTIVITY	Y	0.0159418	32	0.0854679	0.029905	2.85798	0.00426975	0.0347328
GO_REGULATION_OF_BROWN_FAT_CELL_DIFFERENTIATION	Y	0.00690296	12	0.0157941	0.0636166	0.24827	0.803929	0.910585
GO_FIBRIL_ORGANIZATION	Y	0.00934793	17	0.0298556	0.0509356	0.586143	0.557789	0.778725
GO_LONG_CHAIN_FATTY_ACID_METABOLIC_PROCESS	Y	0.0286623	63	0.0491472	0.0249164	1.97248	0.0485739	0.188503
GO_MONOVALENT_INORGANIC_CATION_TRANSPORT	Y	0.120212	363	0.0045576	0.0121594	0.37482	0.7078	0.86661
GO_RELAXATION_OF_CARDIAC_MUSCLE	Y	0.00612959	11	0.137132	0.0401458	3.41585	0.000637646	0.00795433
GO_POSITIVE_REGULATION_OF_BEHAVIOR	Y	0.00927304	17	0.0738506	0.0436025	1.69372	0.09034	0.282875
GO_CALCIUM_MEDIATED_SIGNALING_USING_INTRACELLULAR_CALCIUM_SOURCE	Y	0.00839184	15	0.00706576	0.0585501	0.120679	0.903947	0.956438
GO_NEURAL_TUBE_DEVELOPMENT	Y	0.0539193	134	0.0263742	0.0184984	1.42575	0.153962	0.388824
GO_POLYSACCHARIDE_METABOLIC_PROCESS	Y	0.0280105	61	-0.00980977	0.0306596	-0.319958	0.749005	0.884998
GO_REGULATION_OF_INTRACELLULAR_SIGNAL_TRANSDUCTION	Y	0.323829	1401	0.0362503	0.00598876	6.05305	1.45757e-09	1.21108e-07
GO_CYCLIC_NUCLEOTIDE_METABOLIC_PROCESS	Y	0.0242881	52	0.063789	0.0260558	2.44816	0.0143708	0.0816176
GO_POSITIVE_REGULATION_OF_T_CELL_PROLIFERATION	Y	0.033335	75	0.000378034	0.0268071	0.014102	0.988749	0.993875
GO_MULTICELLULAR_ORGANISMAL_MOVEMENT	Y	0.0161554	32	-0.0295423	0.0449203	-0.657659	0.510768	0.741761
GO_CLATHRIN_COAT_ASSEMBLY	Y	0.00684026	12	0.0757722	0.050179	1.51004	0.131056	0.356135
GO_NEGATIVE_REGULATION_OF_MEIOTIC_NUCLEAR_DIVISION	Y	0.00585911	10	0.054607	0.0610467	0.894512	0.371063	0.637706
GO_VASCULAR_SMOOTH_MUSCLE_CELL_DIFFERENTIATION	Y	0.00683804	12	0.0768483	0.0506466	1.51734	0.129203	0.352956
GO_POSITIVE_REGULATION_OF_BIOSYNTHETIC_PROCESS	Y	0.344768	1546	0.0482183	0.00562852	8.56678	1.17416e-17	5.46338e-15
GO_NEGATIVE_REGULATION_OF_NITROGEN_COMPOUND_METABOLIC_PROCESS	Y	0.295376	1232	0.0515082	0.00612039	8.41584	4.27575e-17	1.42108e-14
GO_DNA_INTEGRATION	Y	0.00308383	5	-0.278128	0.180446	-1.54134	0.123257	0.342396
GO_CELL_ACTIVATION	Y	0.149453	481	0.0101031	0.0104386	0.967865	0.333129	0.603366
GO_REGULATION_OF_MYELINATION	Y	0.0157366	31	0.00262234	0.0413357	0.06344	0.949417	0.973063
GO_NICOTINAMIDE_NUCLEOTIDE_BIOSYNTHETIC_PROCESS	Y	0.00837814	15	-0.041022	0.0676841	-0.60608	0.544472	0.766775
GO_NEGATIVE_REGULATION_OF_JUN_KINASE_ACTIVITY	Y	0.00740048	13	-0.0272546	0.0698362	-0.390265	0.696347	0.859898
GO_REGULATION_OF_AXON_GUIDANCE	Y	0.0178955	37	0.102776	0.0260602	3.94379	8.05938e-05	0.00164475
GO_REGULATION_OF_DOPAMINE_SECRETION	Y	0.00935003	17	0.027132	0.0514262	0.527592	0.597791	0.80171
GO_RESPONSE_TO_COPPER_ION	Y	0.0114425	22	-0.1856	0.0790543	-2.34775	0.0189009	0.0989993
GO_REGULATION_OF_CIRCADIAN_SLEEP_WAKE_CYCLE	Y	0.00935754	17	-0.013123	0.0585833	-0.224006	0.822756	0.921918
GO_NEGATIVE_REGULATION_OF_CELLULAR_PROTEIN_CATABOLIC_PROCESS	Y	0.0260412	56	0.0217601	0.0289299	0.752165	0.451965	0.701699
GO_REGULATION_OF_DOUBLE_STRAND_BREAK_REPAIR_VIA_HOMOLOGOUS_RECOMBINATION	Y	0.00930394	17	0.0610655	0.0458293	1.33245	0.182732	0.434025
GO_RESPONSE_TO_AXON_INJURY	Y	0.0170242	34	0.0211326	0.0371954	0.568152	0.569941	0.786803
GO_REGULATION_OF_VACUOLE_ORGANIZATION	Y	0.0183148	37	-0.000153252	0.0381778	-0.00401417	0.996797	0.998944
GO_CIRCADIAN_REGULATION_OF_GENE_EXPRESSION	Y	0.024546	53	0.0803789	0.0242249	3.31803	0.000908846	0.0103903
GO_RETINOL_METABOLIC_PROCESS	Y	0.012142	23	-0.0433816	0.055014	-0.788555	0.430385	0.685347
GO_OXALOACETATE_METABOLIC_PROCESS	Y	0.00627761	11	-0.174126	0.109965	-1.58348	0.113335	0.323225
GO_NEGATIVE_REGULATION_OF_TUMOR_NECROSIS_FACTOR_MEDIATED_SIGNALING_PATHWAY	Y	0.0053316	9	-0.0864248	0.100127	-0.863152	0.388069	0.649774
GO_NEGATIVE_REGULATION_OF_EXOCYTOSIS	Y	0.0109158	21	0.116351	0.032065	3.6286	0.000285976	0.00449543
GO_INTRACELLULAR_STEROID_HORMONE_RECEPTOR_SIGNALING_PATHWAY	Y	0.0277514	61	0.069076	0.0234684	2.94336	0.00325199	0.0287671
GO_REGULATION_OF_WNT_SIGNALING_PATHWAY	Y	0.0944435	268	0.0302827	0.0130078	2.32805	0.0199238	0.101364
GO_NEGATIVE_REGULATION_OF_CELL_JUNCTION_ASSEMBLY	Y	0.0105937	20	0.0946376	0.0366263	2.58387	0.00978001	0.0638238
GO_ANTIGEN_PROCESSING_AND_PRESENTATION_OF_PEPTIDE_ANTIGEN	Y	0.0522637	129	-0.0285083	0.0223342	-1.27645	0.201819	0.461993
GO_HIPPO_SIGNALING	Y	0.0134674	26	0.0516491	0.0380672	1.35679	0.174871	0.421012
GO_NEGATIVE_REGULATION_OF_EPITHELIAL_TO_MESENCHYMAL_TRANSITION	Y	0.0111962	21	0.0524654	0.0422731	1.24111	0.214588	0.47774
GO_REGULATION_OF_MEMBRANE_DEPOLARIZATION	Y	0.0164906	33	0.0626812	0.0326809	1.91798	0.0551342	0.20556
GO_AMINO_SUGAR_BIOSYNTHETIC_PROCESS	Y	0.00536366	9	0.00166998	0.0768862	0.0217201	0.982672	0.990117
GO_REGULATION_OF_NERVOUS_SYSTEM_DEVELOPMENT	Y	0.192243	679	0.0567984	0.0077838	7.297	3.10064e-13	5.34343e-11
GO_REGULATION_OF_ESTABLISHMENT_OF_PROTEIN_LOCALIZATION_TO_CHROMOSOME	Y	0.00462942	8	-0.323263	0.14507	-2.22832	0.0258748	0.122353
GO_REGULATION_OF_CARDIAC_MUSCLE_CELL_DIFFERENTIATION	Y	0.00874008	16	0.0919385	0.0411393	2.23481	0.0254456	0.120681
GO_POSITIVE_REGULATION_OF_DIGESTIVE_SYSTEM_PROCESS	Y	0.00533598	9	-0.0793245	0.0956033	-0.829726	0.406708	0.665171
GO_INTRINSIC_APOPTOTIC_SIGNALING_PATHWAY_IN_RESPONSE_TO_DNA_DAMAGE	Y	0.0272114	59	0.0240378	0.0279918	0.858746	0.390495	0.652415
GO_TETRAPYRROLE_BIOSYNTHETIC_PROCESS	Y	0.010727	20	-0.0719292	0.0636332	-1.13037	0.258339	0.532116
GO_NUCLEOSIDE_PHOSPHATE_BIOSYNTHETIC_PROCESS	Y	0.0595134	152	-0.0676442	0.0230268	-2.93763	0.00331272	0.0290095
GO_PROTEIN_LIPID_COMPLEX_ASSEMBLY	Y	0.00690507	12	0.00149891	0.0666293	0.0224963	0.982052	0.989922
GO_POSITIVE_REGULATION_OF_SODIUM_ION_TRANSPORT	Y	0.015267	30	0.0372045	0.0375268	0.991411	0.321502	0.591051
GO_DETECTION_OF_OTHER_ORGANISM	Y	0.00482109	8	-0.0572698	0.096657	-0.592506	0.553521	0.775764
GO_ESTABLISHMENT_OF_LOCALIZATION_IN_CELL	Y	0.321334	1378	0.011394	0.00639079	1.78287	0.0746287	0.248034
GO_G_PROTEIN_COUPLED_GLUTAMATE_RECEPTOR_SIGNALING_PATHWAY	Y	0.0062128	11	0.119429	0.0452492	2.63937	0.00831531	0.0560741
GO_NEURAL_RETINA_DEVELOPMENT	Y	0.0217913	46	0.0777472	0.0259288	2.99849	0.00271797	0.0247975
GO_CLEAVAGE_INVOLVED_IN_RRNA_PROCESSING	Y	0.00830123	15	-0.119229	0.0861633	-1.38375	0.166457	0.40918
GO_REGULATION_OF_EXIT_FROM_MITOSIS	Y	0.00789619	14	-0.025983	0.0671825	-0.386753	0.698945	0.861699
GO_FORELIMB_MORPHOGENESIS	Y	0.0186072	38	0.0624589	0.0302253	2.06645	0.0388046	0.161351
GO_ASPARTATE_FAMILY_AMINO_ACID_BIOSYNTHETIC_PROCESS	Y	0.00920043	17	-0.156894	0.0818328	-1.91725	0.055227	0.205623
GO_MANGANESE_ION_TRANSPORT	Y	0.00585221	10	-0.0814522	0.0915622	-0.889583	0.373705	0.638845
GO_POSITIVE_REGULATION_OF_HISTONE_H3_K4_METHYLATION	Y	0.0088744	16	0.0179546	0.0547119	0.328166	0.742791	0.882203
GO_NEURON_PROJECTION_DEVELOPMENT	Y	0.148564	487	0.074745	0.00862304	8.66805	4.87275e-18	2.51921e-15
GO_MALE_GAMETE_GENERATION	Y	0.112736	335	-0.027983	0.0139352	-2.00808	0.0446541	0.178487
GO_POSITIVE_REGULATION_OF_FIBROBLAST_MIGRATION	Y	0.00466257	8	0.130928	0.0508815	2.5732	0.0100864	0.0649382
GO_NEGATIVE_REGULATION_OF_RESPONSE_TO_OXIDATIVE_STRESS	Y	0.0135102	26	-0.0315287	0.0501599	-0.628565	0.529644	0.755035
GO_CHAPERONE_MEDIATED_PROTEIN_COMPLEX_ASSEMBLY	Y	0.00559663	10	-0.354019	0.149292	-2.37132	0.0177383	0.0947302
GO_ORGANELLE_TRANSPORT_ALONG_MICROTUBULE	Y	0.0237466	51	0.0817738	0.024568	3.32847	0.000875487	0.0101334
GO_CHONDROCYTE_DEVELOPMENT	Y	0.0112147	21	0.0422639	0.0438648	0.963506	0.335311	0.604331
GO_MEMBRANE_RAFT_ORGANIZATION	Y	0.00833639	15	-0.0888053	0.0763246	-1.16352	0.244638	0.517174
GO_MITOTIC_SISTER_CHROMATID_SEGREGATION	Y	0.0359119	82	0.0136909	0.0245827	0.556934	0.577582	0.790205
GO_MICROTUBULE_NUCLEATION	Y	0.0093526	17	0.0233052	0.0521145	0.447193	0.654742	0.837688
GO_ESTABLISHMENT_OF_PROTEIN_LOCALIZATION_TO_ORGANELLE	Y	0.0907714	255	-0.0349673	0.016249	-2.15196	0.0314177	0.139758
GO_NEGATIVE_REGULATION_OF_ACUTE_INFLAMMATORY_RESPONSE	Y	0.00587013	10	-0.0513791	0.0853158	-0.602222	0.547036	0.769223
GO_REGULATION_OF_SEQUESTERING_OF_CALCIUM_ION	Y	0.0365532	84	0.0391254	0.0223406	1.75131	0.0799139	0.260027
GO_REGULATION_OF_MEMBRANE_LIPID_METABOLIC_PROCESS	Y	0.00639707	11	0.0110623	0.0674655	0.16397	0.869757	0.943792
GO_XENOPHAGY	Y	0.0336249	76	-0.0442838	0.0303688	-1.4582	0.144807	0.375579
GO_DRUG_TRANSMEMBRANE_TRANSPORT	Y	0.00790119	14	-0.00845771	0.0636382	-0.132903	0.894272	0.95415
GO_POSITIVE_REGULATION_OF_MEMBRANE_DEPOLARIZATION	Y	0.00424933	7	0.0836527	0.0651963	1.28309	0.199482	0.457914
GO_MYD88_DEPENDENT_TOLL_LIKE_RECEPTOR_SIGNALING_PATHWAY	Y	0.0107538	20	0.0398136	0.0454371	0.876235	0.380917	0.644512
GO_REGULATION_OF_PROTEIN_POLYMERIZATION	Y	0.0587323	149	0.0378393	0.0169025	2.23868	0.0251923	0.119856
GO_REGULATION_OF_PROTEIN_TARGETING_TO_MEMBRANE	Y	0.0144173	28	0.00291012	0.0434496	0.066977	0.946601	0.971446
GO_KIDNEY_EPITHELIUM_DEVELOPMENT	Y	0.0469238	114	0.0580865	0.017992	3.22846	0.00124746	0.0135618
GO_HISTONE_H2A_UBIQUITINATION	Y	0.00790114	14	0.00849769	0.0603209	0.140875	0.887971	0.952674
GO_TOOTH_MINERALIZATION	Y	0.00740512	13	-0.0115123	0.0666715	-0.172672	0.862912	0.940091
GO_REGULATION_OF_HAIR_CYCLE	Y	0.010304	19	-0.0219406	0.0569234	-0.38544	0.699917	0.862021
GO_NEGATIVE_REGULATION_OF_BONE_REMODELING	Y	0.00740046	13	-0.0272818	0.0698197	-0.390746	0.695991	0.859898
GO_POSITIVE_REGULATION_OF_RECEPTOR_MEDIATED_ENDOCYTOSIS	Y	0.0193808	40	0.0728788	0.0285861	2.54945	0.0107998	0.0678773
GO_ESTABLISHMENT_OF_MITOTIC_SPINDLE_ORIENTATION	Y	0.0106969	20	0.0674259	0.041386	1.6292	0.103294	0.305958
GO_POSITIVE_REGULATION_OF_PROTEIN_OLIGOMERIZATION	Y	0.00982605	18	0.0277842	0.050016	0.555506	0.578558	0.791075
GO_SPINDLE_CHECKPOINT	Y	0.0116272	22	0.0639888	0.0399491	1.60176	0.109232	0.316867
GO_POSITIVE_REGULATION_OF_STAT_CASCADE	Y	0.026834	58	-0.0181275	0.0322643	-0.561844	0.574232	0.787581
GO_LEUKOTRIENE_BIOSYNTHETIC_PROCESS	Y	0.00686742	12	-0.0802482	0.0834032	-0.962171	0.33598	0.604765
GO_POSITIVE_REGULATION_OF_SUBSTRATE_ADHESION_DEPENDENT_CELL_SPREADING	Y	0.0121421	23	0.0366514	0.0429103	0.854142	0.393041	0.654447
GO_POSITIVE_REGULATION_OF_THYMOCYTE_AGGREGATION	Y	0.00635625	11	-0.0897077	0.0886675	-1.01173	0.311684	0.584134
GO_CATECHOLAMINE_METABOLIC_PROCESS	Y	0.0157015	31	0.0380896	0.0367259	1.03713	0.299692	0.57294
GO_POSITIVE_REGULATION_OF_PROTEIN_COMPLEX_DISASSEMBLY	Y	0.010309	19	0.00633216	0.0521557	0.121409	0.903369	0.956438
GO_BLASTOCYST_FORMATION	Y	0.0135053	26	0.0317772	0.0409676	0.775665	0.43796	0.691717
GO_REGULATION_OF_WATER_LOSS_VIA_SKIN	Y	0.00882213	16	-0.0855032	0.0741115	-1.15371	0.248638	0.52043
GO_NEGATIVE_REGULATION_OF_REGULATED_SECRETORY_PATHWAY	Y	0.00812436	15	0.122221	0.0369839	3.30471	0.000953144	0.010817
GO_CELL_DIFFERENTIATION_INVOLVED_IN_METANEPHROS_DEVELOPMENT	Y	0.00588426	10	-0.00494925	0.074476	-0.0664543	0.947017	0.971658
GO_POSITIVE_REGULATION_OF_ALCOHOL_BIOSYNTHETIC_PROCESS	Y	0.0106844	20	-0.102249	0.0678675	-1.50659	0.131937	0.357387
GO_REGULATION_OF_EPITHELIAL_CELL_DIFFERENTIATION_INVOLVED_IN_KIDNEY_DEVELOPMENT	Y	0.00820216	15	0.107139	0.0401758	2.66676	0.00766753	0.0527766
GO_MAGNESIUM_ION_TRANSPORT	Y	0.00734191	13	0.0730085	0.0496169	1.47144	0.141193	0.370818
GO_PYRIMIDINE_RIBONUCLEOSIDE_METABOLIC_PROCESS	Y	0.0111545	21	-0.0965628	0.0662662	-1.4572	0.145084	0.375791
GO_PROTEIN_LOCALIZATION_TO_CENTROSOME	Y	0.00789916	14	0.0163716	0.0588164	0.278352	0.780747	0.899825
GO_POSITIVE_REGULATION_OF_B_CELL_PROLIFERATION	Y	0.0169932	34	0.0396085	0.0348518	1.13648	0.255774	0.52831
GO_POSITIVE_REGULATION_OF_ORGANELLE_ORGANIZATION	Y	0.150911	488	0.0261831	0.00987999	2.65011	0.00805552	0.054639
GO_MUSCLE_CELL_PROLIFERATION	Y	0.0093315	17	0.0449887	0.0481073	0.935174	0.349715	0.611839
GO_VENTRAL_SPINAL_CORD_INTERNEURON_SPECIFICATION	Y	0.00636686	11	-0.075591	0.0862287	-0.876634	0.380701	0.644512
GO_AMINO_ACID_TRANSMEMBRANE_TRANSPORT	Y	0.027978	61	0.0282062	0.027106	1.04059	0.298086	0.571395
GO_CELLULAR_RESPONSE_TO_ACID_CHEMICAL	Y	0.0615908	158	0.0401779	0.0163154	2.46258	0.0138062	0.0796039
GO_PHAGOCYTOSIS_ENGULFMENT	Y	0.0088777	16	-0.00616538	0.0591127	-0.104299	0.916934	0.959852
GO_REGULATION_OF_TOLERANCE_INDUCTION	Y	0.00687719	12	0.0525975	0.055743	0.943572	0.345405	0.60916
GO_REGULATION_OF_CORTICOSTEROID_HORMONE_SECRETION	Y	0.0068382	12	-0.113062	0.0899468	-1.25699	0.208779	0.470234
GO_CELLULAR_SENESCENCE	Y	0.0143741	28	0.043867	0.0379133	1.15703	0.247278	0.518888
GO_SULFATION	Y	0.00639784	11	0.00462076	0.0688968	0.0670679	0.946529	0.971446
GO_REGULATION_OF_MEIOTIC_CELL_CYCLE	Y	0.0166039	33	-0.00570275	0.04113	-0.138652	0.889727	0.952674
GO_DNA_DEALKYLATION	Y	0.00678483	12	0.0976059	0.0482864	2.02139	0.043258	0.174874
GO_REGULATION_OF_COENZYME_METABOLIC_PROCESS	Y	0.0210954	44	0.0603999	0.0286215	2.1103	0.0348505	0.150566
GO_ACTIN_FILAMENT_BASED_MOVEMENT	Y	0.0354141	81	0.0464582	0.0222857	2.08466	0.037118	0.156866
GO_POSITIVE_REGULATION_OF_EPITHELIAL_CELL_PROLIFERATION	Y	0.0544531	136	0.0426987	0.0174036	2.45344	0.0141617	0.0808701
GO_SARCOMERE_ORGANIZATION	Y	0.010766	20	0.0292241	0.0472589	0.618383	0.536333	0.759637
GO_POSITIVE_REGULATION_OF_B_CELL_MEDIATED_IMMUNITY	Y	0.011988	23	-0.138914	0.0688988	-2.01621	0.0437971	0.176152
GO_OVULATION_CYCLE	Y	0.0419973	99	0.0227294	0.0217356	1.04572	0.295707	0.570214
GO_NEGATIVE_REGULATION_OF_NITRIC_OXIDE_METABOLIC_PROCESS	Y	0.0053591	9	-0.0293721	0.0843641	-0.348159	0.727726	0.873802
GO_VENTRICULAR_SYSTEM_DEVELOPMENT	Y	0.0126218	24	-0.0042034	0.0479894	-0.0875901	0.930204	0.965756
GO_ADULT_LOCOMOTORY_BEHAVIOR	Y	0.0314613	72	0.0998063	0.0196257	5.0855	3.71401e-07	1.78158e-05
GO_REGULATION_OF_ACTIVATED_T_CELL_PROLIFERATION	Y	0.0148358	29	0.0327848	0.0387102	0.846929	0.397049	0.656761
GO_POSITIVE_REGULATION_OF_HOMEOSTATIC_PROCESS	Y	0.0662161	172	-0.00147687	0.0178658	-0.0826646	0.934119	0.966954
GO_RESPONSE_TO_GRAVITY	Y	0.00587181	10	-0.0479558	0.0844864	-0.567616	0.570305	0.786803
GO_REGULATION_OF_IMMUNOGLOBULIN_SECRETION	Y	0.00932966	17	-0.0574893	0.0663093	-0.866986	0.385964	0.648337
GO_ACETYL_COA_METABOLIC_PROCESS	Y	0.0120561	23	-0.103046	0.0636208	-1.61969	0.105322	0.310362
GO_CREATINE_METABOLIC_PROCESS	Y	0.00534647	9	-0.0604307	0.0918094	-0.658219	0.510408	0.741707
GO_REGULATION_OF_CELLULAR_COMPONENT_BIOGENESIS	Y	0.191412	671	0.0412565	0.0081534	5.06003	4.24493e-07	2.01548e-05
GO_POSITIVE_REGULATION_OF_MACROPHAGE_DERIVED_FOAM_CELL_DIFFERENTIATION	Y	0.00790055	14	-0.0120604	0.0643299	-0.187477	0.85129	0.93377
GO_IRON_ION_TRANSPORT	Y	0.0240115	51	-0.0475869	0.0374205	-1.27168	0.203507	0.46355
GO_TRIGLYCERIDE_HOMEOSTASIS	Y	0.00982617	18	0.0276276	0.0501372	0.55104	0.581615	0.793158
GO_REGULATION_OF_RECEPTOR_BINDING	Y	0.00836682	15	-0.0566297	0.0703097	-0.805432	0.420584	0.676749
GO_POSITIVE_REGULATION_OF_POTASSIUM_ION_TRANSPORT	Y	0.016901	34	0.0664062	0.0317714	2.09013	0.0366245	0.155252
GO_POSITIVE_REGULATION_OF_NERVOUS_SYSTEM_DEVELOPMENT	Y	0.12607	392	0.0684941	0.00964449	7.10189	1.28991e-12	1.93738e-10
GO_REGULATION_OF_CARDIAC_MUSCLE_CELL_PROLIFERATION	Y	0.0139648	27	0.0201276	0.0418283	0.481197	0.630384	0.823053
GO_CELLULAR_RESPONSE_TO_OXYGEN_CONTAINING_COMPOUND	Y	0.19701	695	0.0263527	0.00836986	3.14853	0.00164441	0.0169279
GO_REGULATION_OF_INTERLEUKIN_10_SECRETION	Y	0.0042829	7	0.0498591	0.0736986	0.676528	0.498717	0.733416
GO_REGULATION_OF_LAMELLIPODIUM_ASSEMBLY	Y	0.0117068	22	-0.00335568	0.0499845	-0.0671345	0.946476	0.971446
GO_CELLULAR_KETONE_METABOLIC_PROCESS	Y	0.0231166	49	-0.0804351	0.0416571	-1.93089	0.0535172	0.200819
GO_CRANIAL_NERVE_DEVELOPMENT	Y	0.0191363	39	0.0273183	0.0339863	0.803803	0.421524	0.676749
GO_WNT_SIGNALING_PATHWAY_CALCIUM_MODULATING_PATHWAY	Y	0.0163283	34	0.129839	0.0241885	5.3678	8.09722e-08	4.70954e-06
GO_EPIDERMAL_GROWTH_FACTOR_RECEPTOR_SIGNALING_PATHWAY	Y	0.0234966	50	0.0634047	0.0264533	2.39685	0.0165497	0.0901556
GO_CELL_PROLIFERATION_IN_FOREBRAIN	Y	0.0129907	25	0.0620441	0.0375627	1.65175	0.0986082	0.297923
GO_RESPONSE_TO_MURAMYL_DIPEPTIDE	Y	0.00736953	13	0.0573003	0.0526721	1.08787	0.276672	0.550386
GO_REGULATION_OF_POSITIVE_CHEMOTAXIS	Y	0.0107786	20	0.00482108	0.0510835	0.0943764	0.924812	0.964399
GO_REGULATION_OF_IMMUNE_RESPONSE	Y	0.182976	628	0.00126888	0.00943019	0.134555	0.892965	0.95349
GO_NEGATIVE_REGULATION_OF_NOTCH_SIGNALING_PATHWAY	Y	0.0125853	24	-0.0534356	0.0554725	-0.96328	0.335424	0.604331
GO_MEMBRANE_LIPID_CATABOLIC_PROCESS	Y	0.0106583	20	-0.118718	0.0709356	-1.6736	0.0942315	0.29037
GO_POSITIVE_REGULATION_OF_NEUROBLAST_PROLIFERATION	Y	0.0093387	17	0.0392623	0.049386	0.795009	0.426622	0.681219
GO_CARTILAGE_MORPHOGENESIS	Y	0.0061208	11	0.138756	0.0401751	3.45379	0.0005544	0.00724613
GO_PEPTIDE_SECRETION	Y	0.0232616	49	0.0162712	0.0314808	0.516861	0.605262	0.808579
GO_THIOESTER_METABOLIC_PROCESS	Y	0.0310489	69	-0.0275812	0.030405	-0.907128	0.364355	0.62907
GO_NEGATIVE_REGULATION_OF_INTRINSIC_APOPTOTIC_SIGNALING_PATHWAY_IN_RESPONSE_TO_DNA_DAMAGE	Y	0.0126155	24	-0.0213173	0.0505793	-0.421463	0.673424	0.847563
GO_REGULATION_OF_T_HELPER_2_CELL_DIFFERENTIATION	Y	0.00636502	11	0.0588476	0.056917	1.03392	0.301192	0.573535
GO_NEGATIVE_REGULATION_OF_CELLULAR_AMIDE_METABOLIC_PROCESS	Y	0.0471241	116	0.0851229	0.016407	5.1882	2.15298e-07	1.08889e-05
GO_PURINE_RIBONUCLEOSIDE_BISPHOSPHATE_METABOLIC_PROCESS	Y	0.0072941	13	-0.14884	0.0921858	-1.61456	0.106428	0.312042
GO_PEPTIDYL_CYSTEINE_MODIFICATION	Y	0.00930225	17	0.0618649	0.0457483	1.35229	0.176305	0.423515
GO_LEUKOCYTE_DIFFERENTIATION	Y	0.0881542	246	0.0345133	0.0133826	2.57898	0.0099195	0.0641461
GO_RESPONSE_TO_EXOGENOUS_DSRNA	Y	0.0142639	28	-0.112002	0.0593912	-1.88584	0.0593376	0.215365
GO_MORPHOGENESIS_OF_EMBRYONIC_EPITHELIUM	Y	0.0492219	120	0.0289308	0.0193625	1.49417	0.135154	0.361628
GO_SKELETAL_MUSCLE_CONTRACTION	Y	0.0120605	23	-0.100549	0.0658959	-1.52588	0.127062	0.349213
GO_POSITIVE_REGULATION_OF_HORMONE_METABOLIC_PROCESS	Y	0.00588361	10	-0.0112985	0.0759876	-0.148688	0.881802	0.949099
GO_TONGUE_DEVELOPMENT	Y	0.0103093	19	0.00465858	0.0524344	0.0888458	0.929206	0.965756
GO_BONE_GROWTH	Y	0.010728	20	0.0547601	0.0432638	1.26573	0.205632	0.466507
GO_ACTIN_POLYMERIZATION_OR_DEPOLYMERIZATION	Y	0.0165828	33	0.0296192	0.0366877	0.807332	0.419489	0.676749
GO_UV_PROTECTION	Y	0.00535832	9	-0.031965	0.0850965	-0.375632	0.707196	0.86661
GO_PROTEIN_MODIFICATION_BY_SMALL_PROTEIN_REMOVAL	Y	0.0415368	98	0.0430333	0.0203846	2.11107	0.0347836	0.150556
GO_REGULATION_OF_NITRIC_OXIDE_BIOSYNTHETIC_PROCESS	Y	0.0220259	46	-0.0323246	0.0377221	-0.856914	0.391507	0.653288
GO_PHOSPHATIDYLGLYCEROL_METABOLIC_PROCESS	Y	0.0134642	26	-0.0679414	0.0566654	-1.19899	0.230551	0.496875
GO_PYRIMIDINE_NUCLEOSIDE_BIOSYNTHETIC_PROCESS	Y	0.0124826	24	-0.116065	0.0658299	-1.7631	0.0779051	0.256178
GO_POSITIVE_REGULATION_OF_PROTEIN_INSERTION_INTO_MITOCHONDRIAL_MEMBRANE_INVOLVED_IN_APOPTOTIC_SIGNALING_PATHWAY	Y	0.0134464	26	0.0592079	0.0372291	1.59037	0.111775	0.320499
GO_TRANSLATIONAL_TERMINATION	Y	0.0271599	60	-0.139316	0.0431901	-3.22565	0.00125976	0.0136223
GO_CYTOKINETIC_PROCESS	Y	0.00788096	14	-0.0526044	0.072182	-0.728775	0.466152	0.70959
GO_ENDOCARDIAL_CUSHION_MORPHOGENESIS	Y	0.0112279	21	0.0323403	0.0454448	0.711639	0.4767	0.717479
GO_REGULATION_OF_INNATE_IMMUNE_RESPONSE	Y	0.0960186	273	0.00667757	0.0138817	0.481033	0.6305	0.823053
GO_VESICLE_MEDIATED_TRANSPORT	Y	0.263023	1033	0.0151197	0.00719604	2.10111	0.0356494	0.152882
GO_INTERLEUKIN_1_PRODUCTION	Y	0.00586246	10	0.0512703	0.0613162	0.836162	0.403078	0.660627
GO_MODULATION_BY_HOST_OF_VIRAL_PROCESS	Y	0.00882676	16	-0.0812902	0.0724867	-1.12145	0.262115	0.535627
GO_REGULATION_OF_DNA_REPAIR	Y	0.0298887	66	0.0315672	0.0258206	1.22256	0.221516	0.484813
GO_REGULATION_OF_MEMBRANE_LIPID_DISTRIBUTION	Y	0.0143932	28	0.0336135	0.0391934	0.857632	0.39111	0.65318
GO_REFLEX	Y	0.0102064	19	0.0759543	0.0407237	1.86511	0.0621866	0.222238
GO_LEUKOCYTE_MEDIATED_IMMUNITY	Y	0.0488406	119	-0.0419416	0.0241512	-1.73663	0.0824753	0.2648
GO_ORGANOPHOSPHATE_BIOSYNTHETIC_PROCESS	Y	0.124003	379	-0.0396556	0.0135407	-2.92862	0.00341024	0.0297708
GO_NEGATIVE_REGULATION_OF_SERINE_TYPE_PEPTIDASE_ACTIVITY	Y	0.00371009	6	-0.125071	0.130851	-0.955833	0.339173	0.606342
GO_PROTEIN_LOCALIZATION_TO_CELL_PERIPHERY	Y	0.0538986	134	0.0298661	0.018275	1.63426	0.102226	0.305298
GO_REGULATION_OF_PROTEIN_GLYCOSYLATION	Y	0.00588439	10	0.0021668	0.0728286	0.0297521	0.976265	0.987728
GO_NEGATIVE_REGULATION_OF_FIBROBLAST_PROLIFERATION	Y	0.0117027	22	-0.0178167	0.0523035	-0.340642	0.733379	0.87718
GO_REGULATION_OF_MUSCLE_TISSUE_DEVELOPMENT	Y	0.039457	92	0.0353685	0.0215956	1.63776	0.101494	0.303893
GO_ORGANIC_ACID_BIOSYNTHETIC_PROCESS	Y	0.0785039	213	-0.0436686	0.0181738	-2.40283	0.0162816	0.0894431
GO_NEGATIVE_REGULATION_OF_DNA_DEPENDENT_DNA_REPLICATION	Y	0.00834563	15	-0.0798866	0.0754273	-1.05912	0.289563	0.562257
GO_REGULATION_OF_LEUKOCYTE_MIGRATION	Y	0.0492788	120	-0.0155973	0.0222925	-0.699667	0.484147	0.7222
GO_ORGAN_MATURATION	Y	0.00879521	16	0.0744682	0.0456309	1.63197	0.102708	0.305746
GO_REGULATION_OF_CELLULAR_RESPONSE_TO_HEAT	Y	0.0287767	63	-0.0165387	0.0307979	-0.537006	0.591272	0.799531
GO_POSITIVE_REGULATION_OF_ACUTE_INFLAMMATORY_RESPONSE	Y	0.012585	24	-0.0537319	0.0552141	-0.973155	0.330493	0.601738
GO_GASTRULATION_WITH_MOUTH_FORMING_SECOND	Y	0.0130624	25	0.026227	0.0425781	0.615973	0.537922	0.760776
GO_ENDOCARDIUM_DEVELOPMENT	Y	0.00582268	10	0.0801064	0.0546479	1.46586	0.142708	0.372399
GO_ENDOTHELIAL_CELL_DIFFERENTIATION	Y	0.0294197	65	0.0503626	0.0243497	2.06831	0.0386294	0.160915
GO_NEGATIVE_REGULATION_OF_CELLULAR_PROTEIN_LOCALIZATION	Y	0.0485838	118	0.0199274	0.0201165	0.990599	0.321899	0.591312
GO_INSEMINATION	Y	0.00534628	9	0.0484348	0.0652656	0.742119	0.458028	0.706633
GO_REGULATION_OF_NUCLEOBASE_CONTAINING_COMPOUND_TRANSPORT	Y	0.0058844	10	0.00156559	0.0729678	0.0214559	0.982882	0.990117
GO_GLUTATHIONE_DERIVATIVE_BIOSYNTHETIC_PROCESS	Y	0.00676074	12	-0.185601	0.102539	-1.81005	0.0703095	0.239413
GO_PHOSPHATIDYLINOSITOL_3_PHOSPHATE_BIOSYNTHETIC_PROCESS	Y	0.0212331	44	-0.00783729	0.0358648	-0.218523	0.827025	0.923259
GO_CYCLIC_NUCLEOTIDE_CATABOLIC_PROCESS	Y	0.00881087	16	0.0681235	0.0456354	1.49278	0.135518	0.362394
GO_RESPONSE_TO_EPIDERMAL_GROWTH_FACTOR	Y	0.0148199	29	0.0414908	0.0374589	1.10764	0.268038	0.540935
GO_POSITIVE_REGULATION_OF_TRANSMEMBRANE_TRANSPORT	Y	0.0443716	106	0.0376068	0.0200466	1.87597	0.0606796	0.218531
GO_PROTEIN_METHYLATION	Y	0.0416614	99	0.0653666	0.0188145	3.47426	0.000513816	0.00690263
GO_REGULATION_OF_NUCLEOTIDE_CATABOLIC_PROCESS	Y	0.0150424	30	0.0918123	0.0309885	2.96279	0.00305382	0.0275376
GO_POSITIVE_REGULATION_OF_CARBOHYDRATE_METABOLIC_PROCESS	Y	0.027469	60	0.0555665	0.0249685	2.22547	0.0260659	0.123007
GO_WNT_SIGNALING_PATHWAY	Y	0.103672	303	0.0508333	0.0114916	4.42351	9.78407e-06	0.000293712
GO_REGULATION_OF_NEUROTRANSMITTER_LEVELS	Y	0.0648567	168	0.0288446	0.0164107	1.75767	0.0788247	0.257383
GO_POSITIVE_REGULATION_OF_STRESS_ACTIVATED_PROTEIN_KINASE_SIGNALING_CASCADE	Y	0.0493313	121	0.0548077	0.017676	3.10069	0.00193456	0.0190467
GO_PEPTIDYL_ARGININE_MODIFICATION	Y	0.00935927	17	0.0030915	0.0557077	0.055495	0.955745	0.976951
GO_SPECIFICATION_OF_ORGAN_IDENTITY	Y	0.00639799	11	0.00122304	0.0696501	0.0175598	0.98599	0.991745
GO_REGULATION_OF_CELLULAR_AMINE_METABOLIC_PROCESS	Y	0.0294901	65	-0.0425806	0.0327238	-1.30121	0.193207	0.449047
GO_RRNA_TRANSCRIPTION	Y	0.00784637	14	-0.0920214	0.0804588	-1.14371	0.252764	0.525049
GO_POSITIVE_REGULATION_OF_LIPID_TRANSPORT	Y	0.0178749	36	0.0240706	0.0357572	0.673168	0.500852	0.735021
GO_ANATOMICAL_STRUCTURE_ARRANGEMENT	Y	0.00884656	16	0.0488783	0.0492825	0.991797	0.321314	0.591051
GO_EPITHELIAL_TO_MESENCHYMAL_TRANSITION	Y	0.0234979	50	0.0631917	0.0264443	2.38961	0.0168794	0.0915385
GO_PATHWAY_RESTRICTED_SMAD_PROTEIN_PHOSPHORYLATION	Y	0.00562459	10	0.140276	0.0401613	3.49281	0.000479444	0.00659825
GO_SINGLE_ORGANISM_MEMBRANE_BUDDING	Y	0.0306975	68	0.00805659	0.0274682	0.293307	0.769292	0.895999
GO_NEGATIVE_REGULATION_OF_MAPK_CASCADE	Y	0.0515519	127	0.0329314	0.0186055	1.76998	0.0767516	0.252921
GO_SPONGIOTROPHOBLAST_LAYER_DEVELOPMENT	Y	0.0063605	11	0.0622364	0.0565403	1.10074	0.271027	0.544277
GO_NEGATIVE_REGULATION_OF_NERVOUS_SYSTEM_DEVELOPMENT	Y	0.0853052	237	0.0497307	0.0129926	3.82763	0.000129948	0.0024381
GO_HISTONE_H2A_MONOUBIQUITINATION	Y	0.00587861	10	0.0278317	0.0668524	0.416316	0.677185	0.849769
GO_REGULATION_OF_EXTRACELLULAR_MATRIX_ORGANIZATION	Y	0.0120793	23	0.0651031	0.0384788	1.69192	0.0906832	0.283568
GO_CELL_DIFFERENTIATION_IN_SPINAL_CORD	Y	0.0236685	50	0.0119284	0.0316096	0.377366	0.705907	0.865792
GO_MITOTIC_G2_M_TRANSITION_CHECKPOINT	Y	0.00931819	17	-0.0691308	0.0710865	-0.972489	0.330824	0.601738
GO_POSITIVE_REGULATION_OF_INTERLEUKIN_8_SECRETION	Y	0.00535646	9	-0.0374855	0.0863808	-0.433957	0.664327	0.843184
GO_PYRIMIDINE_NUCLEOBASE_METABOLIC_PROCESS	Y	0.00983573	18	0.0076309	0.0533608	0.143006	0.886288	0.952401
GO_RNA_METHYLATION	Y	0.0214671	45	-0.0920017	0.0446164	-2.06206	0.0392206	0.16265
GO_PURINE_CONTAINING_COMPOUND_SALVAGE	Y	0.00736815	13	-0.0770696	0.0797449	-0.966452	0.333835	0.60394
GO_INNER_EAR_RECEPTOR_STEREOCILIUM_ORGANIZATION	Y	0.00932769	17	-0.0595892	0.0675967	-0.88154	0.378041	0.641746
GO_NEGATIVE_REGULATION_OF_CATION_TRANSMEMBRANE_TRANSPORT	Y	0.0215605	45	0.0479271	0.0295692	1.62084	0.105074	0.310024
GO_REGULATION_OF_PHOSPHOLIPID_METABOLIC_PROCESS	Y	0.0248439	53	0.0272256	0.0291877	0.932775	0.350952	0.612965
GO_NEGATIVE_REGULATION_OF_CYTOPLASMIC_TRANSPORT	Y	0.0416256	98	0.027622	0.0215031	1.28456	0.198967	0.456957
GO_POSITIVE_REGULATION_OF_CELLULAR_RESPONSE_TO_TRANSFORMING_GROWTH_FACTOR_BETA_STIMULUS	Y	0.0116428	22	0.0581855	0.0403336	1.44261	0.149154	0.381745
GO_AXON_REGENERATION	Y	0.00933126	17	0.0451663	0.0484338	0.932537	0.351075	0.612965
GO_MICROTUBULE_BASED_PROCESS	Y	0.138111	434	-0.00499169	0.011472	-0.43512	0.663482	0.842572
GO_CALCIUM_MEDIATED_SIGNALING	Y	0.0319761	72	0.0614002	0.0223499	2.74723	0.00601774	0.0443749
GO_LOW_DENSITY_LIPOPROTEIN_PARTICLE_CLEARANCE	Y	0.00588275	10	0.0153247	0.0697511	0.219705	0.826104	0.923178
GO_SPERM_MOTILITY	Y	0.0133142	26	-0.143185	0.0649949	-2.20301	0.0276099	0.127782
GO_NEGATIVE_REGULATION_OF_SEQUENCE_SPECIFIC_DNA_BINDING_TRANSCRIPTION_FACTOR_ACTIVITY	Y	0.0475848	115	0.0105237	0.020998	0.501177	0.616254	0.815538
GO_NEGATIVE_REGULATION_OF_PROTEIN_CATABOLIC_PROCESS	Y	0.0416413	98	0.0235902	0.0217793	1.08315	0.278762	0.553362
GO_CELLULAR_AMINO_ACID_METABOLIC_PROCESS	Y	0.0939792	268	-0.069387	0.0173982	-3.98818	6.69216e-05	0.00140899
GO_POSITIVE_REGULATION_OF_DNA_BINDING	Y	0.0160547	32	0.0642463	0.0333038	1.92909	0.0537393	0.201328
GO_NUCLEOTIDE_TRANSPORT	Y	0.0107748	20	0.016999	0.0490767	0.346377	0.729065	0.874365
GO_REGULATION_OF_HAIR_FOLLICLE_DEVELOPMENT	Y	0.0078583	14	-0.0798105	0.077361	-1.03166	0.302248	0.574258
GO_CRISTAE_FORMATION	Y	0.00587216	10	-0.047216	0.084219	-0.560633	0.575056	0.787909
GO_SYNAPTIC_VESICLE_RECYCLING	Y	0.0121434	23	0.0356813	0.043088	0.828103	0.407626	0.665925
GO_POSITIVE_REGULATION_OF_NUCLEOSIDE_METABOLIC_PROCESS	Y	0.0105504	20	0.102914	0.0366517	2.8079	0.00499343	0.0389839
GO_DORSAL_VENTRAL_PATTERN_FORMATION	Y	0.0366117	84	-0.0292443	0.0276714	-1.05684	0.290602	0.563026
GO_REGULATION_OF_VITAMIN_METABOLIC_PROCESS	Y	0.00584396	10	-0.0931568	0.0947154	-0.983544	0.325357	0.595783
GO_AEROBIC_RESPIRATION	Y	0.0204794	43	-0.141764	0.0510861	-2.77499	0.00552765	0.0418895
GO_CELLULAR_RESPONSE_TO_INSULIN_STIMULUS	Y	0.0550997	138	0.0436384	0.0172389	2.53139	0.011372	0.0698127
GO_SEQUESTERING_OF_METAL_ION	Y	0.0041454	7	-0.283588	0.15031	-1.88669	0.0592229	0.215116
GO_COPPER_ION_TRANSPORT	Y	0.0083895	15	-0.0175391	0.0632131	-0.277459	0.781432	0.9
GO_MEMBRANE_ASSEMBLY	Y	0.0119483	23	0.0955356	0.0344096	2.77643	0.0055033	0.041773
GO_REGULATION_OF_DNA_DAMAGE_RESPONSE_SIGNAL_TRANSDUCTION_BY_P53_CLASS_MEDIATOR	Y	0.0125874	24	0.0424907	0.0410522	1.03504	0.300668	0.573535
GO_LIPID_DIGESTION	Y	0.00828838	15	-0.12947	0.084966	-1.52378	0.127586	0.349875
GO_POSITIVE_REGULATION_OF_CELLULAR_COMPONENT_ORGANIZATION	Y	0.254363	992	0.0433837	0.00681764	6.36345	2.03408e-10	2.01374e-08
GO_POSITIVE_REGULATION_OF_G1_S_TRANSITION_OF_MITOTIC_CELL_CYCLE	Y	0.0107414	20	0.0477973	0.044451	1.07528	0.282268	0.556608
GO_POSITIVE_REGULATION_OF_GENE_EXPRESSION	Y	0.338228	1503	0.0495288	0.00567895	8.72147	3.052e-18	1.77512e-15
GO_NEUROMUSCULAR_PROCESS_CONTROLLING_BALANCE	Y	0.0212828	45	0.0896416	0.0254674	3.51986	0.000433143	0.00607052
GO_AXON_EXTENSION_INVOLVED_IN_AXON_GUIDANCE	Y	0.0063889	11	0.0328564	0.0627752	0.523397	0.600706	0.804068
GO_ORGAN_OR_TISSUE_SPECIFIC_IMMUNE_RESPONSE	Y	0.00740597	13	-0.00529756	0.0653919	-0.0810126	0.935433	0.967014
GO_REGULATION_OF_CARDIAC_MUSCLE_CONTRACTION_BY_REGULATION_OF_THE_RELEASE_OF_SEQUESTERED_CALCIUM_ION	Y	0.00688527	13	0.163903	0.0362917	4.51626	6.34565e-06	0.000200969
GO_NEGATIVE_REGULATION_OF_ORGANELLE_ASSEMBLY	Y	0.010299	19	-0.0308804	0.0584758	-0.528089	0.597446	0.80171
GO_RESPONSE_TO_INTERFERON_BETA	Y	0.00886547	16	0.0321451	0.0520786	0.617242	0.537085	0.760054
GO_REGULATION_OF_ORGAN_FORMATION	Y	0.0143103	28	0.0655107	0.0348778	1.87829	0.0603619	0.217724
GO_FOREBRAIN_DEVELOPMENT	Y	0.109515	328	0.0725245	0.0103755	6.98999	2.87331e-12	4.05136e-10
GO_RHODOPSIN_MEDIATED_SIGNALING_PATHWAY	Y	0.00585906	10	0.0546556	0.0612661	0.892101	0.372354	0.637833
GO_ACTIVATION_OF_CYSTEINE_TYPE_ENDOPEPTIDASE_ACTIVITY	Y	0.0337056	76	-0.00619308	0.0271804	-0.227851	0.819765	0.920223
GO_REGULATION_OF_MESONEPHROS_DEVELOPMENT	Y	0.012592	24	0.0398557	0.0413798	0.963168	0.33548	0.604331
GO_CARBOHYDRATE_DERIVATIVE_METABOLIC_PROCESS	Y	0.227498	844	-0.0158725	0.00860254	-1.8451	0.0650441	0.228426
GO_REGULATION_OF_CHROMATIN_BINDING	Y	0.0088323	16	0.0576742	0.0475782	1.2122	0.225457	0.490085
GO_STEM_CELL_PROLIFERATION	Y	0.0252587	55	0.0867045	0.0229661	3.77533	0.000160456	0.00288263
GO_NAD_METABOLIC_PROCESS	Y	0.0224053	47	-0.0464065	0.0388045	-1.19591	0.231753	0.499003
GO_REGULATION_OF_EXTRACELLULAR_MATRIX_ASSEMBLY	Y	0.00585501	10	0.0583388	0.0597711	0.976036	0.329063	0.600436
GO_PROTEIN_LOCALIZATION_TO_LYSOSOME	Y	0.00982071	18	-0.0392936	0.0615678	-0.638216	0.523343	0.74967
GO_MRNA_MODIFICATION	Y	0.00637744	11	-0.0596811	0.0828617	-0.72025	0.471383	0.713747
GO_SOMATIC_DIVERSIFICATION_OF_IMMUNOGLOBULINS	Y	0.010571	20	-0.16828	0.0802422	-2.09715	0.0359979	0.153809
GO_ERBB2_SIGNALING_PATHWAY	Y	0.0170155	34	0.0278846	0.0363706	0.766682	0.443284	0.695682
GO_AMEBOIDAL_TYPE_CELL_MIGRATION	Y	0.0536745	134	0.0531101	0.0168883	3.14478	0.0016656	0.0170486
GO_HEMATOPOIETIC_STEM_CELL_DIFFERENTIATION	Y	0.00587411	10	-0.0429437	0.0830524	-0.517067	0.605118	0.808579
GO_SPINAL_CORD_MOTOR_NEURON_DIFFERENTIATION	Y	0.0157259	31	0.0219624	0.0388042	0.565978	0.571417	0.787095
GO_MONOCARBOXYLIC_ACID_METABOLIC_PROCESS	Y	0.12651	388	-0.0226232	0.012756	-1.77353	0.0761627	0.251519
GO_CELLULAR_RESPONSE_TO_TOPOLOGICALLY_INCORRECT_PROTEIN	Y	0.0441253	105	-0.0147222	0.0237552	-0.619748	0.535434	0.759103
GO_AMINOGLYCAN_BIOSYNTHETIC_PROCESS	Y	0.041327	97	-0.000721469	0.0236716	-0.0304783	0.975686	0.987719
GO_DICARBOXYLIC_ACID_METABOLIC_PROCESS	Y	0.0373363	88	-0.150498	0.0370661	-4.06026	4.92838e-05	0.00112411
GO_NEGATIVE_REGULATION_OF_ASTROCYTE_DIFFERENTIATION	Y	0.0066722	12	0.126018	0.0439429	2.86778	0.00413986	0.0341418
GO_POSITIVE_REGULATION_OF_PROTEASOMAL_PROTEIN_CATABOLIC_PROCESS	Y	0.0379329	88	0.049054	0.0210422	2.33122	0.0197558	0.101238
GO_REGULATION_OF_ENERGY_HOMEOSTASIS	Y	0.00838739	15	0.0213143	0.0558818	0.381417	0.7029	0.864322
GO_REGULATION_OF_MEMBRANE_POTENTIAL	Y	0.101369	293	0.0303624	0.0124596	2.43687	0.0148275	0.083331
GO_POSITIVE_REGULATION_OF_RELEASE_OF_CYTOCHROME_C_FROM_MITOCHONDRIA	Y	0.0134819	26	-0.0560384	0.054071	-1.03639	0.30004	0.57294
GO_PEPTIDYL_PROLINE_HYDROXYLATION	Y	0.00535812	9	-0.0325944	0.0852119	-0.38251	0.702089	0.863781
GO_MULTICELLULAR_ORGANISMAL_RESPONSE_TO_STRESS	Y	0.0277337	61	0.0710229	0.0233558	3.04091	0.00236303	0.0220344
GO_NEGATIVE_REGULATION_OF_SMALL_GTPASE_MEDIATED_SIGNAL_TRANSDUCTION	Y	0.0161829	33	0.107716	0.0268895	4.00586	6.21125e-05	0.00132573
GO_ESTABLISHMENT_OF_LOCALIZATION_BY_MOVEMENT_ALONG_MICROTUBULE	Y	0.0335154	76	0.0547849	0.0222883	2.45801	0.0139829	0.0802465
GO_AMINO_ACID_BETAINE_TRANSPORT	Y	0.00689602	12	-0.036297	0.0747831	-0.485364	0.627426	0.821627
GO_AMMONIUM_TRANSMEMBRANE_TRANSPORT	Y	0.0097813	18	-0.0791424	0.0687747	-1.15075	0.249855	0.522216
GO_REGULATION_OF_GROWTH	Y	0.161175	535	0.0480615	0.00887751	5.41385	6.27009e-08	3.78892e-06
GO_CATION_TRANSPORT	Y	0.189474	658	0.000361797	0.00924721	0.039125	0.968791	0.984233
GO_GABAERGIC_NEURON_DIFFERENTIATION	Y	0.00740621	13	-0.00033353	0.0643895	-0.00517988	0.995867	0.998227
GO_MACROAUTOPHAGY	Y	0.0846143	233	-0.00302373	0.015456	-0.195635	0.844899	0.930294
GO_FATTY_ACID_BETA_OXIDATION_USING_ACYL_COA_DEHYDROGENASE	Y	0.00638612	11	-0.0440668	0.0795956	-0.553633	0.579839	0.792361
GO_MEMBRANE_DOCKING	Y	0.0291632	64	-0.0150119	0.0304069	-0.4937	0.621526	0.819484
GO_EXCITATORY_POSTSYNAPTIC_POTENTIAL	Y	0.0126141	24	0.021435	0.0442176	0.484761	0.627853	0.821627
GO_GLUTAMINE_FAMILY_AMINO_ACID_METABOLIC_PROCESS	Y	0.0247933	53	-0.0529633	0.0375324	-1.41113	0.158227	0.396626
GO_SIGNAL_TRANSDUCTION_INVOLVED_IN_CELLULAR_RESPONSE_TO_AMMONIUM_ION	Y	0.00885513	16	0.0423491	0.0505286	0.83812	0.401977	0.65998
GO_REGULATION_OF_NUCLEASE_ACTIVITY	Y	0.00982724	18	0.0262387	0.0501513	0.523191	0.60085	0.804068
GO_RESPONSE_TO_INORGANIC_SUBSTANCE	Y	0.128394	395	0.00492105	0.0116585	0.422099	0.672959	0.847563
GO_NEGATIVE_REGULATION_OF_HISTONE_ACETYLATION	Y	0.00778125	14	0.0918639	0.045354	2.02548	0.0428365	0.173622
GO_PHAGOLYSOSOME_ASSEMBLY	Y	0.00583434	10	-0.105899	0.0982576	-1.07776	0.281158	0.555961
GO_MODULATION_BY_SYMBIONT_OF_HOST_CELLULAR_PROCESS	Y	0.0128882	25	0.0868151	0.0345009	2.51631	0.01187	0.0716627
GO_REGULATION_OF_VESICLE_MEDIATED_TRANSPORT	Y	0.125727	385	0.0224928	0.0111884	2.01037	0.0444113	0.178143
GO_ORGANONITROGEN_COMPOUND_CATABOLIC_PROCESS	Y	0.0959759	274	-0.0471577	0.0162207	-2.90725	0.00365195	0.0312362
GO_REGULATION_OF_ASTROCYTE_DIFFERENTIATION	Y	0.0126742	25	0.117493	0.031294	3.75448	0.000174405	0.00309735
GO_REGULATION_OF_HYDROGEN_PEROXIDE_INDUCED_CELL_DEATH	Y	0.00737565	13	-0.0679431	0.0782817	-0.867931	0.385447	0.648307
GO_ADP_METABOLIC_PROCESS	Y	0.0191158	39	-0.0441615	0.0423233	-1.04343	0.296766	0.57053
GO_POSITIVE_REGULATION_OF_CELL_PROLIFERATION	Y	0.196388	692	0.0260265	0.00839447	3.10044	0.00193619	0.0190467
GO_REGULATION_OF_SODIUM_ION_TRANSPORT	Y	0.0294982	65	0.0340333	0.0258221	1.31799	0.187528	0.440914
GO_POSITIVE_REGULATION_OF_TUMOR_NECROSIS_FACTOR_SUPERFAMILY_CYTOKINE_PRODUCTION	Y	0.0199925	41	-0.00741343	0.0371082	-0.199779	0.841657	0.928897
GO_NEGATIVE_REGULATION_OF_G_PROTEIN_COUPLED_RECEPTOR_PROTEIN_SIGNALING_PATHWAY	Y	0.0174633	35	0.00435262	0.0386948	0.112486	0.91044	0.95802
GO_HISTONE_DEUBIQUITINATION	Y	0.0102843	19	0.0408792	0.0463083	0.882762	0.37738	0.641415
GO_GLUCOSAMINE_CONTAINING_COMPOUND_METABOLIC_PROCESS	Y	0.0121519	23	0.02869	0.0439783	0.652367	0.514175	0.744154
GO_ORGANIC_ACID_TRANSPORT	Y	0.0816827	223	0.00598375	0.015362	0.389516	0.6969	0.859898
GO_FOREBRAIN_REGIONALIZATION	Y	0.0126221	24	0.00130507	0.0471632	0.0276713	0.977925	0.988547
GO_FOREBRAIN_GENERATION_OF_NEURONS	Y	0.0266503	58	0.0620946	0.0247065	2.51329	0.0119722	0.0720503
GO_CALCIUM_DEPENDENT_CELL_CELL_ADHESION_VIA_PLASMA_MEMBRANE_CELL_ADHESION_MOLECULES	Y	0.00978961	18	0.0553151	0.0449598	1.23032	0.218596	0.483886
GO_PANCREAS_DEVELOPMENT	Y	0.0276897	61	0.075562	0.0230146	3.28323	0.00102877	0.0114793
GO_LEUKOCYTE_CHEMOTAXIS	Y	0.036242	83	-0.0310637	0.0280025	-1.10932	0.267312	0.540784
GO_GLUCOSE_6_PHOSPHATE_METABOLIC_PROCESS	Y	0.0106518	20	-0.122612	0.0725292	-1.69052	0.0909511	0.283643
GO_MITOCHONDRIAL_TRANSMEMBRANE_TRANSPORT	Y	0.0208385	44	-0.153219	0.0533714	-2.8708	0.00410042	0.033969
GO_SYNAPTIC_VESICLE_TRANSPORT_ALONG_MICROTUBULE	Y	0.00638429	11	0.0396941	0.0611955	0.648644	0.516579	0.745765
GO_NUCLEAR_PORE_ORGANIZATION	Y	0.00690499	12	0.00337758	0.0662312	0.0509968	0.959329	0.979324
GO_CELLULAR_RESPONSE_TO_NITRIC_OXIDE	Y	0.00685496	12	0.0679364	0.052535	1.29316	0.195975	0.452992
GO_INTRA_S_DNA_DAMAGE_CHECKPOINT	Y	0.00690294	12	-0.0169926	0.0706001	-0.240689	0.8098	0.914768
GO_REGULATION_OF_SYNAPSE_STRUCTURE_OR_ACTIVITY	Y	0.0783325	214	0.0616275	0.0131005	4.70422	2.57273e-06	9.57674e-05
GO_HISTONE_H3_K9_MODIFICATION	Y	0.00721902	13	0.112529	0.0417943	2.69246	0.00710122	0.0501396
GO_RESPONSE_TO_INTERFERON_ALPHA	Y	0.00935865	17	-0.00815798	0.057701	-0.141384	0.887569	0.952674
GO_NEGATIVE_REGULATION_OF_TRANSLATIONAL_INITIATION	Y	0.00982901	18	-0.0263355	0.0593054	-0.444066	0.657002	0.838451
GO_REGULATION_OF_TOLL_LIKE_RECEPTOR_SIGNALING_PATHWAY	Y	0.0187366	38	-0.00563011	0.0383215	-0.146918	0.883199	0.949959
GO_CARDIAC_CONDUCTION_SYSTEM_DEVELOPMENT	Y	0.00639794	11	-0.00303365	0.0705895	-0.0429759	0.965721	0.982831
GO_REGULATION_OF_GLOMERULAR_FILTRATION	Y	0.00581192	10	-0.133182	0.104372	-1.27604	0.201963	0.461993
GO_REGULATION_OF_FATTY_ACID_METABOLIC_PROCESS	Y	0.028745	63	0.0298949	0.0265354	1.1266	0.25993	0.534589
GO_CYTOCHROME_COMPLEX_ASSEMBLY	Y	0.00883982	16	-0.0686268	0.0701206	-0.978696	0.327747	0.598981
GO_RESPONSE_TO_METAL_ION	Y	0.098252	281	0.00446657	0.0137808	0.324116	0.745855	0.883473
GO_CELL_SUBSTRATE_ADHESION	Y	0.0591473	150	0.0257961	0.0175322	1.47135	0.141218	0.370818
GO_NEGATIVE_REGULATION_OF_DEVELOPMENTAL_GROWTH	Y	0.033668	76	0.0264974	0.0244832	1.08227	0.279152	0.553631
GO_NEGATIVE_REGULATION_OF_INTRACELLULAR_SIGNAL_TRANSDUCTION	Y	0.123734	378	0.0349339	0.0108688	3.21413	0.00131137	0.0141245
GO_PEPTIDYL_GLUTAMIC_ACID_CARBOXYLATION	Y	0.00429649	7	-0.0139131	0.0914601	-0.152122	0.879093	0.947688
GO_ENDOCARDIAL_CUSHION_FORMATION	Y	0.00789947	14	0.0154432	0.0589632	0.261912	0.793393	0.906282
GO_REGULATION_OF_NUCLEAR_CELL_CYCLE_DNA_REPLICATION	Y	0.00584352	10	0.0673125	0.0580001	1.16056	0.245841	0.518505
GO_ORGANIC_HYDROXY_COMPOUND_TRANSPORT	Y	0.0496354	121	0.00174324	0.0210504	0.0828124	0.934002	0.966954
GO_MITOCHONDRIAL_CALCIUM_ION_HOMEOSTASIS	Y	0.00786019	14	-0.0777873	0.0765819	-1.01574	0.309771	0.581562
GO_REPLACEMENT_OSSIFICATION	Y	0.0117067	22	-0.00451705	0.050165	-0.0900438	0.928254	0.965608
GO_REGULATION_OF_ACTIN_FILAMENT_BASED_PROCESS	Y	0.0944783	270	0.056337	0.0119187	4.72678	2.30333e-06	8.71334e-05
GO_WOUND_HEALING	Y	0.127387	391	0.00265381	0.011796	0.224976	0.822001	0.921854
GO_MITOTIC_CELL_CYCLE_ARREST	Y	0.00740284	13	0.0189817	0.0604324	0.314098	0.753451	0.887322
GO_HEXOSE_CATABOLIC_PROCESS	Y	0.0191033	39	-0.0508861	0.0431415	-1.17952	0.238213	0.507744
GO_GLUTAMINE_METABOLIC_PROCESS	Y	0.0102526	19	0.0588818	0.0438009	1.34431	0.178871	0.427463
GO_RESPONSE_TO_NERVE_GROWTH_FACTOR	Y	0.0167564	34	0.0902222	0.0291203	3.09826	0.00195047	0.0191063
GO_NEGATIVE_REGULATION_OF_TELOMERASE_ACTIVITY	Y	0.00680699	12	-0.143789	0.0974716	-1.47519	0.140184	0.36914
GO_RNA_PROCESSING	Y	0.184916	637	-0.00738361	0.00960206	-0.768962	0.441929	0.695164
GO_REGULATION_OF_IRE1_MEDIATED_UNFOLDED_PROTEIN_RESPONSE	Y	0.00577838	10	0.0998037	0.0520889	1.91603	0.0553819	0.205824
GO_POSITIVE_REGULATION_OF_FATTY_ACID_BIOSYNTHETIC_PROCESS	Y	0.00688987	12	-0.0481029	0.0769366	-0.625228	0.531831	0.757225
GO_SYNAPTIC_VESICLE_CYCLE	Y	0.035185	80	0.00728756	0.0254003	0.286908	0.774187	0.89694
GO_NUCLEOBASE_CONTAINING_SMALL_MOLECULE_METABOLIC_PROCESS	Y	0.132669	413	-0.0326027	0.0127388	-2.55933	0.0104978	0.0663673
GO_POSITIVE_REGULATION_OF_INTERLEUKIN_1_SECRETION	Y	0.00790065	14	-0.0115486	0.0642371	-0.179781	0.857327	0.936858
GO_REGULATION_OF_CYTOKINE_PRODUCTION_INVOLVED_IN_IMMUNE_RESPONSE	Y	0.0220536	46	0.00255152	0.0339598	0.0751335	0.94011	0.969605
GO_POSITIVE_REGULATION_OF_LEUKOCYTE_PROLIFERATION	Y	0.0465435	112	0.0161646	0.0208905	0.773774	0.439077	0.692436
GO_PSEUDOURIDINE_SYNTHESIS	Y	0.00777968	14	-0.149974	0.0891855	-1.6816	0.0926694	0.287269
GO_CELLULAR_PROTEIN_COMPLEX_ASSEMBLY	Y	0.0934174	264	-0.0227626	0.0154143	-1.47672	0.139774	0.368398
GO_DEFENSE_RESPONSE	Y	0.225585	835	-0.0237423	0.00883399	-2.68761	0.00720506	0.0505658
GO_POLY_A_MRNA_EXPORT_FROM_NUCLEUS	Y	0.00526409	9	-0.175399	0.120406	-1.45673	0.145212	0.375791
GO_PHOSPHOLIPID_BIOSYNTHETIC_PROCESS	Y	0.0763019	205	-0.0163087	0.0171325	-0.951915	0.341156	0.607501
GO_NEGATIVE_REGULATION_OF_LEUKOCYTE_APOPTOTIC_PROCESS	Y	0.0174541	35	0.019635	0.036826	0.533182	0.593916	0.800084
GO_POSITIVE_REGULATION_OF_HYDROLASE_ACTIVITY	Y	0.208377	750	0.0277103	0.00804747	3.44335	0.000576225	0.00732562
GO_CELLULAR_RESPONSE_TO_INTERLEUKIN_4	Y	0.0121209	23	-0.0614009	0.057663	-1.06482	0.286974	0.559914
GO_PORPHYRIN_CONTAINING_COMPOUND_METABOLIC_PROCESS	Y	0.0124704	24	-0.122244	0.0645859	-1.89274	0.058413	0.213508
GO_SPERM_CAPACITATION	Y	0.0062853	11	-0.166629	0.111275	-1.49745	0.1343	0.360752
GO_POSITIVE_REGULATION_OF_TELOMERASE_ACTIVITY	Y	0.0130419	25	0.0409215	0.04048	1.01091	0.312079	0.584134
GO_NEGATIVE_REGULATION_OF_INTERLEUKIN_6_PRODUCTION	Y	0.0161561	32	-0.0288452	0.0448019	-0.643839	0.51969	0.748087
GO_CELLULAR_MONOVALENT_INORGANIC_CATION_HOMEOSTASIS	Y	0.0362865	83	0.00626645	0.0250219	0.250439	0.802252	0.909739
GO_RESPONSE_TO_METHYLMERCURY	Y	0.00585637	10	-0.0751816	0.0936883	-0.802466	0.422297	0.676862
GO_REGULATION_OF_CENTRIOLE_REPLICATION	Y	0.00638834	11	-0.0393763	0.078525	-0.50145	0.616062	0.815538
GO_POSITIVE_REGULATION_OF_MULTICELLULAR_ORGANISMAL_METABOLIC_PROCESS	Y	0.00935718	17	0.0135682	0.053849	0.251966	0.801071	0.909514
GO_REGULATION_OF_ACUTE_INFLAMMATORY_RESPONSE	Y	0.0271247	59	-0.060179	0.0358855	-1.67697	0.0935705	0.289291
GO_CYTOKINE_PRODUCTION	Y	0.0415689	98	0.0383416	0.0207354	1.84909	0.0644659	0.227744
GO_TOLL_LIKE_RECEPTOR_SIGNALING_PATHWAY	Y	0.0310735	69	0.0115606	0.0269631	0.428757	0.668107	0.844708
GO_POSITIVE_REGULATION_OF_INTRACELLULAR_TRANSPORT	Y	0.106413	311	0.0162099	0.0126483	1.28159	0.200009	0.458897
GO_FOREBRAIN_CELL_MIGRATION	Y	0.0261166	57	0.078986	0.0235971	3.34727	0.000818266	0.00968802
GO_DEMETHYLATION	Y	0.0210418	44	0.0695278	0.0277544	2.50511	0.0122525	0.0730907
GO_CELL_MOTILITY	Y	0.198096	702	0.0376202	0.0080703	4.66156	3.16716e-06	0.000110803
GO_POSITIVE_REGULATION_OF_ENDOTHELIAL_CELL_MIGRATION	Y	0.0279197	61	0.0439471	0.025666	1.71227	0.0868695	0.275156
GO_DECIDUALIZATION	Y	0.0107031	20	0.0651946	0.0421241	1.54768	0.121722	0.339991
GO_REGULATION_OF_MONONUCLEAR_CELL_MIGRATION	Y	0.00784756	14	-0.0908454	0.0818604	-1.10976	0.267122	0.540671
GO_CERAMIDE_BIOSYNTHETIC_PROCESS	Y	0.0190949	39	0.0447638	0.0320109	1.39839	0.162018	0.402871
GO_NEGATIVE_REGULATION_OF_ORGAN_GROWTH	Y	0.0103095	19	0.00186449	0.0529037	0.0352431	0.971886	0.985429
GO_NEGATIVE_REGULATION_OF_RESPONSE_TO_BIOTIC_STIMULUS	Y	0.0135248	26	-0.00556819	0.0463029	-0.120256	0.904282	0.956438
GO_ORGANOPHOSPHATE_ESTER_TRANSPORT	Y	0.0310737	69	0.0113767	0.0269776	0.421709	0.673244	0.847563
GO_MICROTUBULE_CYTOSKELETON_ORGANIZATION	Y	0.103478	300	0.00518757	0.0133176	0.389528	0.696892	0.859898
GO_HISTONE_MONOUBIQUITINATION	Y	0.0112303	21	0.0300412	0.0458736	0.65487	0.512562	0.743054
GO_REGULATION_OF_CELL_CYCLE_G2_M_PHASE_TRANSITION	Y	0.0236446	50	0.0278305	0.0300243	0.926934	0.353977	0.616182
GO_EMBRYONIC_VISCEROCRANIUM_MORPHOGENESIS	Y	0.00638713	11	0.0356838	0.0619947	0.575595	0.564898	0.783683
GO_SOMATIC_CELL_DNA_RECOMBINATION	Y	0.0135251	26	0.00310786	0.0450582	0.0689743	0.945011	0.970546
GO_PIGMENTATION	Y	0.0340731	77	0.010523	0.0256227	0.41069	0.681306	0.85221
GO_POSITIVE_REGULATION_OF_PROTEIN_LOCALIZATION_TO_CELL_PERIPHERY	Y	0.0156767	31	0.0485348	0.0353778	1.3719	0.170116	0.414558
GO_POSITIVE_REGULATION_OF_TRANSLATIONAL_INITIATION	Y	0.00983493	18	-0.0115653	0.0566864	-0.204023	0.838339	0.928381
GO_NEGATIVE_REGULATION_OF_CELL_AGING	Y	0.00787689	14	0.0466999	0.053276	0.876566	0.380737	0.644512
GO_B_CELL_MEDIATED_IMMUNITY	Y	0.0229455	49	-0.126123	0.0459612	-2.74412	0.00607506	0.0445856
GO_AORTA_DEVELOPMENT	Y	0.0198677	41	0.0596451	0.0295528	2.01826	0.0435836	0.176037
GO_CELL_DIFFERENTIATION_INVOLVED_IN_EMBRYONIC_PLACENTA_DEVELOPMENT	Y	0.0116075	22	0.0703474	0.0387015	1.81769	0.0691329	0.2367
GO_ASYMMETRIC_CELL_DIVISION	Y	0.00679797	12	0.093181	0.0471265	1.97725	0.0480325	0.186989
GO_SPECIFICATION_OF_SYMMETRY	Y	0.0416777	98	0.00720293	0.0229731	0.313538	0.753877	0.887374
GO_PROTEIN_LOCALIZATION_TO_ENDOPLASMIC_RETICULUM	Y	0.0284962	63	-0.101017	0.0391339	-2.58132	0.00985234	0.0640265
GO_BILE_ACID_BIOSYNTHETIC_PROCESS	Y	0.00679293	12	-0.156843	0.10196	-1.53829	0.124001	0.343437
GO_NEGATIVE_REGULATION_OF_COAGULATION	Y	0.0191528	39	-0.0145954	0.0388893	-0.375306	0.707438	0.86661
GO_HISTONE_EXCHANGE	Y	0.0191525	39	-0.0150536	0.0389401	-0.386583	0.699071	0.861699
GO_LIPID_HOMEOSTASIS	Y	0.0355389	81	-0.0183579	0.0273353	-0.671581	0.501862	0.735021
GO_CELLULAR_RESPIRATION	Y	0.0396909	94	-0.119269	0.0340852	-3.49915	0.000468202	0.00646452
GO_NUCLEOTIDE_EXCISION_REPAIR_DNA_DAMAGE_RECOGNITION	Y	0.00981334	18	-0.0484516	0.0632845	-0.765615	0.443918	0.695682
GO_REGULATION_OF_ENDOTHELIAL_CELL_DEVELOPMENT	Y	0.00583633	10	0.0721251	0.0566858	1.27236	0.203265	0.46355
GO_B_CELL_DIFFERENTIATION	Y	0.0302902	67	0.0246231	0.026213	0.939346	0.347569	0.610509
GO_NEURAL_PRECURSOR_CELL_PROLIFERATION	Y	0.0291713	65	0.0790445	0.0221001	3.57665	0.000349196	0.00510946
GO_NUCLEAR_TRANSPORT	Y	0.100734	290	0.00681168	0.0134723	0.505606	0.613141	0.813664
GO_PEPTIDE_METABOLIC_PROCESS	Y	0.124607	382	-0.0491223	0.013852	-3.54623	0.000392064	0.00556181
GO_NEGATIVE_REGULATION_OF_CELL_SUBSTRATE_ADHESION	Y	0.0225792	48	0.079337	0.0254444	3.11806	0.00182417	0.0181753
GO_REGULATION_OF_EPITHELIAL_CELL_DIFFERENTIATION	Y	0.0427944	102	0.0582999	0.0189814	3.07142	0.00213453	0.0205206
GO_ENDOTHELIAL_CELL_MIGRATION	Y	0.0223847	47	0.0448708	0.0291025	1.54182	0.12314	0.342278
GO_ORGANIC_HYDROXY_COMPOUND_CATABOLIC_PROCESS	Y	0.0263687	57	-0.0526724	0.0359089	-1.46683	0.142444	0.372355
GO_GLYCEROLIPID_METABOLIC_PROCESS	Y	0.101568	293	0.00100531	0.0136446	0.0736782	0.941268	0.969605
GO_PEPTIDYL_AMINO_ACID_MODIFICATION	Y	0.203902	731	0.0422473	0.00782678	5.39778	6.85673e-08	4.09031e-06
GO_SECRETION	Y	0.151167	489	0.0251682	0.00990216	2.54169	0.0110426	0.0686914
GO_REGULATION_OF_SEQUESTERING_OF_TRIGLYCERIDE	Y	0.00535089	9	0.0421456	0.0670918	0.628178	0.529898	0.755165
GO_NEGATIVE_REGULATION_OF_FIBROBLAST_GROWTH_FACTOR_RECEPTOR_SIGNALING_PATHWAY	Y	0.00586449	10	0.0490935	0.0618187	0.794154	0.42712	0.681678
GO_NEGATIVE_REGULATION_OF_PROTEIN_OLIGOMERIZATION	Y	0.00535339	9	0.0381487	0.0679292	0.561596	0.574401	0.787581
GO_CELL_ACTIVATION_INVOLVED_IN_IMMUNE_RESPONSE	Y	0.0444355	106	-0.0290206	0.0246916	-1.17532	0.239886	0.510609
GO_POSITIVE_REGULATION_OF_VASODILATION	Y	0.0143998	28	-0.0329768	0.0483646	-0.681837	0.495354	0.731476
GO_HOMOCYSTEINE_METABOLIC_PROCESS	Y	0.00578525	10	-0.163067	0.107768	-1.51313	0.13027	0.355096
GO_NEGATIVE_REGULATION_OF_HISTONE_MODIFICATION	Y	0.0164233	33	0.0764381	0.0312377	2.44698	0.0144179	0.0817134
GO_COFACTOR_CATABOLIC_PROCESS	Y	0.00674188	12	-0.201949	0.103558	-1.95011	0.0511829	0.19457
GO_PYRIMIDINE_CONTAINING_COMPOUND_CATABOLIC_PROCESS	Y	0.0121636	23	-0.0133424	0.0504244	-0.264602	0.79132	0.905427
GO_NEGATIVE_REGULATION_OF_DNA_BINDING	Y	0.0181008	37	0.0781191	0.0295393	2.64459	0.00818819	0.055297
GO_VENTRAL_SPINAL_CORD_DEVELOPMENT	Y	0.0207878	43	0.0326761	0.031789	1.02791	0.304012	0.57609
GO_CELLULAR_MONOVALENT_INORGANIC_ANION_HOMEOSTASIS	Y	0.00839166	15	-0.0084346	0.0614812	-0.13719	0.890883	0.952674
GO_REGULATION_OF_CIRCADIAN_RHYTHM	Y	0.0383116	90	0.0781517	0.0189068	4.13353	3.59317e-05	0.000889309
GO_ANION_TRANSPORT	Y	0.131169	406	-0.000582023	0.0116951	-0.0497664	0.960309	0.979465
GO_CELL_CELL_ADHESION	Y	0.148625	480	0.0413906	0.00950979	4.35242	1.35596e-05	0.000382382
GO_MORPHOGENESIS_OF_AN_ENDOTHELIUM	Y	0.00688028	12	0.0499153	0.0562731	0.887019	0.375084	0.639589
GO_GUANOSINE_CONTAINING_COMPOUND_METABOLIC_PROCESS	Y	0.0191553	39	0.00999535	0.03601	0.277572	0.781345	0.9
GO_INORGANIC_CATION_IMPORT_INTO_CELL	Y	0.00740455	13	0.0134607	0.0615977	0.218525	0.827023	0.923259
GO_POSITIVE_REGULATION_OF_RELEASE_OF_SEQUESTERED_CALCIUM_ION_INTO_CYTOSOL	Y	0.0157157	31	0.0299717	0.0377532	0.793884	0.427277	0.681678
GO_REGULATION_OF_CYCLIC_NUCLEOTIDE_METABOLIC_PROCESS	Y	0.0502873	123	0.0166848	0.0199132	0.837874	0.402116	0.65998
GO_CHONDROITIN_SULFATE_PROTEOGLYCAN_BIOSYNTHETIC_PROCESS	Y	0.013951	27	-0.0375826	0.0498577	-0.753797	0.450984	0.700968
GO_GLANDULAR_EPITHELIAL_CELL_DEVELOPMENT	Y	0.00819032	15	0.109689	0.0399986	2.74232	0.00610852	0.0447469
GO_RESPONSE_TO_MAGNESIUM_ION	Y	0.010766	20	0.0292605	0.0471616	0.620431	0.534984	0.758971
GO_CELLULAR_RESPONSE_TO_ATP	Y	0.00482052	8	-0.0585751	0.0968772	-0.604633	0.545433	0.767664
GO_CHOLESTEROL_EFFLUX	Y	0.0103054	19	-0.0188046	0.0563835	-0.333512	0.738753	0.878686
GO_PROTEIN_OLIGOMERIZATION	Y	0.114205	340	0.00444329	0.012557	0.35385	0.723457	0.872961
GO_BETA_CATENIN_DESTRUCTION_COMPLEX_DISASSEMBLY	Y	0.0102752	19	0.0470085	0.0451088	1.04211	0.297377	0.571303
GO_POSITIVE_REGULATION_OF_NUCLEAR_TRANSCRIBED_MRNA_POLY_A_TAIL_SHORTENING	Y	0.00493934	9	0.173189	0.0419814	4.12538	3.72255e-05	0.000906861
GO_INNER_DYNEIN_ARM_ASSEMBLY	Y	0.00407145	7	-0.389007	0.179715	-2.16458	0.0304365	0.1367
GO_REGULATION_OF_EPITHELIAL_CELL_PROLIFERATION	Y	0.088524	248	0.0464663	0.0128457	3.61726	0.000298781	0.0046034
GO_CHROMATIN_ASSEMBLY_OR_DISASSEMBLY	Y	0.0437887	104	0.0048076	0.0224746	0.213912	0.830618	0.92461
GO_REGULATION_OF_NITRIC_OXIDE_SYNTHASE_ACTIVITY	Y	0.0195758	40	0.00617753	0.0359943	0.171625	0.863735	0.940107
GO_REGULATION_OF_ANDROGEN_RECEPTOR_SIGNALING_PATHWAY	Y	0.0102594	19	0.0556431	0.0442682	1.25696	0.208791	0.470234
GO_LEFT_RIGHT_PATTERN_FORMATION	Y	0.00933413	17	-0.052501	0.0653716	-0.803117	0.421921	0.676749
GO_REGULATION_OF_LIPID_BIOSYNTHETIC_PROCESS	Y	0.0434248	103	0.0147667	0.0218761	0.675014	0.499678	0.734134
GO_RESPONSE_TO_XENOBIOTIC_STIMULUS	Y	0.0276206	60	0.0112855	0.0289401	0.389962	0.696571	0.859898
GO_REGULATION_OF_MACROPHAGE_DERIVED_FOAM_CELL_DIFFERENTIATION	Y	0.0130573	25	0.0306451	0.0419015	0.731361	0.464571	0.70959
GO_EMBRYONIC_DIGESTIVE_TRACT_MORPHOGENESIS	Y	0.00882874	16	0.0595971	0.0471652	1.26358	0.206401	0.467209
GO_PLACENTA_BLOOD_VESSEL_DEVELOPMENT	Y	0.0143874	28	0.0371235	0.0388478	0.955614	0.339284	0.606342
GO_POSITIVE_REGULATION_OF_GUANYLATE_CYCLASE_ACTIVITY	Y	0.00507774	9	-0.384004	0.176802	-2.17194	0.0298768	0.134446
GO_MELANIN_METABOLIC_PROCESS	Y	0.00639353	11	-0.0261071	0.0757992	-0.344425	0.730532	0.875171
GO_POSITIVE_REGULATION_OF_RESPONSE_TO_EXTERNAL_STIMULUS	Y	0.0854785	236	0.00765553	0.0148636	0.515053	0.606524	0.809104
GO_POSITIVE_REGULATION_OF_CELL_CYCLE_G2_M_PHASE_TRANSITION	Y	0.00779993	14	0.0857762	0.0455109	1.88474	0.0594858	0.215567
GO_REGULATION_OF_REMOVAL_OF_SUPEROXIDE_RADICALS	Y	0.00426524	7	-0.100414	0.114817	-0.874554	0.381832	0.645825
GO_NEGATIVE_REGULATION_OF_STEM_CELL_PROLIFERATION	Y	0.00777362	14	0.094168	0.0454449	2.07213	0.0382712	0.160262
GO_AGING	Y	0.0804771	219	0.0142424	0.0151052	0.942883	0.345757	0.609166
GO_REGULATION_OF_VACUOLAR_TRANSPORT	Y	0.0134552	26	0.0562046	0.0374845	1.49941	0.13379	0.359632
GO_CELLULAR_RESPONSE_TO_ELECTRICAL_STIMULUS	Y	0.00682499	12	0.0827534	0.0522246	1.58457	0.113087	0.323215
GO_REGULATION_OF_OXIDATIVE_PHOSPHORYLATION	Y	0.00629288	11	-0.159141	0.105492	-1.50856	0.131435	0.356598
GO_NEGATIVE_REGULATION_OF_CHROMOSOME_SEGREGATION	Y	0.0111624	21	0.0661225	0.0402861	1.64132	0.100753	0.302064
GO_NEGATIVE_REGULATION_OF_EXTRINSIC_APOPTOTIC_SIGNALING_PATHWAY	Y	0.0379049	88	0.0524529	0.0208135	2.52013	0.011742	0.0711401
GO_REGULATION_OF_BONE_DEVELOPMENT	Y	0.00838243	15	-0.0338004	0.0662704	-0.510037	0.610034	0.811924
GO_POSITIVE_REGULATION_OF_T_CELL_MEDIATED_CYTOTOXICITY	Y	0.0068778	12	-0.0666658	0.0805992	-0.827128	0.408179	0.665925
GO_REGULATION_OF_LEUKOCYTE_MEDIATED_CYTOTOXICITY	Y	0.0187343	38	0.0107613	0.036382	0.295787	0.767397	0.895585
GO_REGULATION_OF_CHOLESTEROL_BIOSYNTHETIC_PROCESS	Y	0.00588095	10	-0.0240111	0.0788223	-0.304624	0.760657	0.890848
GO_POLYSACCHARIDE_CATABOLIC_PROCESS	Y	0.00835293	15	-0.0724157	0.0742229	-0.975652	0.329254	0.600436
GO_NEGATIVE_REGULATION_OF_AUTOPHAGY	Y	0.0212292	44	-0.0143246	0.0365789	-0.391609	0.695353	0.859452
GO_INNER_CELL_MASS_CELL_PROLIFERATION	Y	0.00584579	10	-0.0906407	0.0940909	-0.963331	0.335398	0.604331
GO_POSITIVE_REGULATION_OF_MRNA_SPLICING_VIA_SPLICEOSOME	Y	0.00734932	13	-0.0976423	0.0833454	-1.17154	0.241403	0.51243
GO_POSTTRANSCRIPTIONAL_REGULATION_OF_GENE_EXPRESSION	Y	0.119999	364	0.0413356	0.0108675	3.80359	0.000143221	0.00265501
GO_POSITIVE_REGULATION_OF_DNA_DEPENDENT_DNA_REPLICATION	Y	0.00534218	9	0.0532215	0.0646864	0.822761	0.410658	0.668342
GO_STARTLE_RESPONSE	Y	0.0107037	20	0.0649485	0.0419767	1.54725	0.121826	0.339991
GO_MOTOR_NEURON_AXON_GUIDANCE	Y	0.0137222	27	0.0947828	0.0325432	2.91252	0.00359089	0.0308843
GO_TRANSCRIPTION_FROM_RNA_POLYMERASE_II_PROMOTER	Y	0.183293	636	0.0536458	0.0080949	6.6271	3.54852e-11	4.12781e-09
GO_PYRIMIDINE_RIBONUCLEOSIDE_CATABOLIC_PROCESS	Y	0.00318959	5	0.00362518	0.102495	0.0353693	0.971786	0.985429
GO_RESPONSE_TO_ENDOGENOUS_STIMULUS	Y	0.30089	1254	0.0244276	0.00644959	3.78747	0.000152825	0.00278861
GO_NEGATIVE_REGULATION_OF_NITRIC_OXIDE_BIOSYNTHETIC_PROCESS	Y	0.0053591	9	-0.0293721	0.0843641	-0.348159	0.727726	0.873802
GO_HYPOTHALAMUS_DEVELOPMENT	Y	0.00983287	18	0.016711	0.0517848	0.3227	0.746927	0.883473
GO_PATTERN_RECOGNITION_RECEPTOR_SIGNALING_PATHWAY	Y	0.0388242	90	0.00726628	0.0239577	0.303297	0.761668	0.891148
GO_POSITIVE_REGULATION_OF_MEIOTIC_CELL_CYCLE	Y	0.00638191	11	0.0427125	0.0609555	0.700717	0.483492	0.721747
GO_LATERAL_MESODERM_DEVELOPMENT	Y	0.00482849	8	0.0325579	0.0733735	0.443729	0.657246	0.838451
GO_POSITIVE_REGULATION_OF_CELL_MATRIX_ADHESION	Y	0.0174537	35	0.0200119	0.0368054	0.543723	0.586641	0.797224
GO_EMBRYO_DEVELOPMENT	Y	0.217671	796	0.0279998	0.0078243	3.57857	0.000346639	0.00508805
GO_REGULATION_OF_STRIATED_MUSCLE_CONTRACTION	Y	0.0298358	66	0.0440575	0.0248185	1.77519	0.075889	0.251012
GO_REGULATION_OF_LEUKOCYTE_DIFFERENTIATION	Y	0.0714075	189	0.0232575	0.0157784	1.474	0.140503	0.369565
GO_REGULATION_OF_TRANSCRIPTION_ELONGATION_FROM_RNA_POLYMERASE_II_PROMOTER	Y	0.011659	22	-0.065111	0.0609043	-1.06907	0.285057	0.558025
GO_WATER_TRANSPORT	Y	0.00935628	17	0.0160091	0.0534063	0.299761	0.764364	0.892941
GO_ESTABLISHMENT_OF_CELL_POLARITY	Y	0.0356996	82	0.0566117	0.0212659	2.66209	0.00777459	0.0532771
GO_BIOTIN_METABOLIC_PROCESS	Y	0.00617333	11	-0.270858	0.123194	-2.19862	0.0279209	0.128629
GO_STEM_CELL_DIVISION	Y	0.0135107	27	0.120468	0.0279756	4.30618	1.67228e-05	0.000455036
GO_REACTIVE_OXYGEN_SPECIES_BIOSYNTHETIC_PROCESS	Y	0.00983261	18	0.0172883	0.0517677	0.33396	0.738415	0.878542
GO_POSITIVE_REGULATION_OF_NITRIC_OXIDE_SYNTHASE_BIOSYNTHETIC_PROCESS	Y	0.00690451	12	-0.00865466	0.068776	-0.125838	0.899862	0.955731
GO_DIGESTIVE_SYSTEM_DEVELOPMENT	Y	0.0525367	130	0.0350463	0.018234	1.92203	0.0546221	0.204142
GO_POSITIVE_REGULATION_OF_STEROID_BIOSYNTHETIC_PROCESS	Y	0.0063108	11	-0.140978	0.0996937	-1.41411	0.15735	0.395101
GO_CELLULAR_RESPONSE_TO_ACETYLCHOLINE	Y	0.00885513	16	0.0423491	0.0505286	0.83812	0.401977	0.65998
GO_DNA_CONFORMATION_CHANGE	Y	0.0665037	173	-0.015517	0.0185949	-0.834473	0.404029	0.66172
GO_DETECTION_OF_MECHANICAL_STIMULUS	Y	0.0168823	34	0.0702302	0.0316502	2.21895	0.0265058	0.1245
GO_SEXUAL_REPRODUCTION	Y	0.159722	525	-0.0176912	0.0108579	-1.62934	0.103264	0.305958
GO_EPIDERMAL_CELL_DIFFERENTIATION	Y	0.0401368	94	0.0408527	0.0210183	1.94367	0.0519555	0.196615
GO_SYNAPTONEMAL_COMPLEX_ORGANIZATION	Y	0.00784895	14	-0.089453	0.0787162	-1.1364	0.255809	0.52831
GO_BASE_EXCISION_REPAIR	Y	0.0148594	29	0.00397245	0.042553	0.0933529	0.925625	0.964814
GO_CELLULAR_CARBOHYDRATE_CATABOLIC_PROCESS	Y	0.01214	23	-0.0452816	0.0554438	-0.816712	0.414107	0.670905
GO_NEGATIVE_REGULATION_OF_TYPE_2_IMMUNE_RESPONSE	Y	0.00482979	8	0.0293344	0.0744789	0.393861	0.693689	0.858957
GO_REGULATION_OF_NUCLEOSIDE_METABOLIC_PROCESS	Y	0.0189488	39	0.0757105	0.0287683	2.63174	0.00850428	0.0570179
GO_TAXIS	Y	0.124307	381	0.0428165	0.0105688	4.05122	5.12261e-05	0.00113502
GO_CELLULAR_RESPONSE_TO_NITROGEN_STARVATION	Y	0.00428797	7	-0.049565	0.101319	-0.489199	0.624709	0.821121
GO_CITRULLINE_METABOLIC_PROCESS	Y	0.00629095	11	-0.161059	0.104009	-1.54852	0.121521	0.339991
GO_NEGATIVE_REGULATION_OF_AXON_GUIDANCE	Y	0.0128511	25	0.0934537	0.0328329	2.84635	0.00442885	0.0357768
GO_ORGAN_FORMATION	Y	0.0148508	29	0.0205721	0.0403089	0.510362	0.609806	0.811853
GO_NEGATIVE_REGULATION_OF_CALCIUM_ION_TRANSPORT_INTO_CYTOSOL	Y	0.00688287	12	0.0475124	0.0568425	0.835861	0.403247	0.660672
GO_REGULATION_OF_CARDIAC_MUSCLE_CELL_MEMBRANE_REPOLARIZATION	Y	0.0107772	20	0.0109922	0.0500942	0.219431	0.826317	0.923178
GO_RESPONSE_TO_GLUCAGON	Y	0.0199726	41	0.0264886	0.0332871	0.795763	0.426184	0.680986
GO_NEGATIVE_REGULATION_OF_TISSUE_REMODELING	Y	0.00887699	16	-0.0104552	0.0598947	-0.17456	0.861428	0.938914
GO_MEMBRANE_TUBULATION	Y	0.00588279	10	0.0151698	0.0698206	0.217268	0.828003	0.923687
GO_EMBRYONIC_PLACENTA_DEVELOPMENT	Y	0.0332144	75	0.0447288	0.0231433	1.93269	0.0532945	0.200145
GO_SMALL_MOLECULE_BIOSYNTHETIC_PROCESS	Y	0.1182	357	-0.0490572	0.0142899	-3.43299	0.000598692	0.00756988
GO_ANATOMICAL_STRUCTURE_MATURATION	Y	0.0182276	37	0.0529922	0.0319943	1.6563	0.0976831	0.296097
GO_REGULATION_OF_AMYLOID_PRECURSOR_PROTEIN_CATABOLIC_PROCESS	Y	0.00534026	9	0.0552778	0.0636291	0.868751	0.384998	0.648307
GO_CELLULAR_EXTRAVASATION	Y	0.0120396	23	0.0764136	0.0369846	2.06609	0.038838	0.161351
GO_REGULATION_OF_JAK_STAT_CASCADE	Y	0.0462008	111	0.015553	0.0210304	0.739549	0.459586	0.706927
GO_REGULATION_OF_TELOMERE_MAINTENANCE	Y	0.0240451	51	-0.0315805	0.035789	-0.88241	0.37757	0.641415
GO_REGULATION_OF_EXTRINSIC_APOPTOTIC_SIGNALING_PATHWAY_VIA_DEATH_DOMAIN_RECEPTORS	Y	0.0232679	49	0.00936113	0.0321995	0.290723	0.771268	0.896798
GO_NEGATIVE_REGULATION_OF_WOUND_HEALING	Y	0.0228656	48	0.00557419	0.0329318	0.169265	0.865591	0.941467
GO_REGULATION_OF_IMMUNOGLOBULIN_PRODUCTION	Y	0.0198671	41	-0.0796389	0.0454986	-1.75036	0.0800782	0.26038
GO_FATTY_ACYL_COA_METABOLIC_PROCESS	Y	0.0208226	43	-0.0028937	0.0357271	-0.0809945	0.935447	0.967014
GO_NEGATIVE_REGULATION_OF_MUSCLE_CELL_APOPTOTIC_PROCESS	Y	0.0139525	27	0.0314036	0.0403461	0.778357	0.436372	0.69111
GO_GPI_ANCHOR_METABOLIC_PROCESS	Y	0.0141765	28	-0.148677	0.0642501	-2.31404	0.02068	0.103992
GO_POSITIVE_REGULATION_OF_HISTONE_DEACETYLATION	Y	0.00688669	12	0.0436298	0.0577922	0.754942	0.450297	0.700511
GO_BLOOD_COAGULATION_FIBRIN_CLOT_FORMATION	Y	0.0105612	20	-0.17354	0.0793435	-2.1872	0.0287444	0.130741
GO_POSITIVE_REGULATION_OF_INSULIN_SECRETION	Y	0.0248724	53	0.00452265	0.0314501	0.143804	0.885657	0.951943
GO_NEGATIVE_REGULATION_OF_NEUROTRANSMITTER_TRANSPORT	Y	0.0080614	15	0.132254	0.0350214	3.77638	0.000159779	0.0028816
GO_AMYLOID_PRECURSOR_PROTEIN_METABOLIC_PROCESS	Y	0.00535756	9	0.0299744	0.0699423	0.428559	0.668251	0.844708
GO_NUCLEIC_ACID_PHOSPHODIESTER_BOND_HYDROLYSIS	Y	0.072513	193	-0.0422045	0.019074	-2.21267	0.0269364	0.12546
GO_CHEMICAL_HOMEOSTASIS_WITHIN_A_TISSUE	Y	0.00633382	11	0.0782478	0.0535895	1.46013	0.144275	0.374617
GO_REGULATION_OF_MYELOID_CELL_DIFFERENTIATION	Y	0.0593265	151	0.0426513	0.0165395	2.57875	0.00992589	0.0641461
GO_REGULATION_OF_RESPONSE_TO_EXTERNAL_STIMULUS	Y	0.209795	755	-0.00409771	0.00877408	-0.467025	0.64049	0.829446
GO_REGULATION_OF_RNA_POLYMERASE_II_TRANSCRIPTIONAL_PREINITIATION_COMPLEX_ASSEMBLY	Y	0.00532562	9	0.0682785	0.0621112	1.09929	0.271659	0.545075
GO_RETROGRADE_PROTEIN_TRANSPORT_ER_TO_CYTOSOL	Y	0.00887646	16	0.0120942	0.0557723	0.21685	0.828328	0.923828
GO_EPITHELIAL_CELL_CELL_ADHESION	Y	0.00690334	12	0.0143481	0.0638859	0.22459	0.822302	0.921918
GO_REGULATION_OF_MITOCHONDRION_ORGANIZATION	Y	0.068398	179	-0.00187687	0.0175389	-0.107012	0.914781	0.959098
GO_POLYAMINE_METABOLIC_PROCESS	Y	0.00686461	12	-0.0836869	0.0839337	-0.99706	0.318753	0.589772
GO_POSITIVE_REGULATION_OF_MUSCLE_CONTRACTION	Y	0.0198501	41	-0.0856981	0.0457742	-1.87219	0.0612008	0.219616
GO_NEGATIVE_REGULATION_OF_T_CELL_RECEPTOR_SIGNALING_PATHWAY	Y	0.00686636	12	0.0607709	0.0544823	1.11542	0.264688	0.537791
GO_PTERIDINE_CONTAINING_COMPOUND_BIOSYNTHETIC_PROCESS	Y	0.00829497	15	-0.124267	0.0851339	-1.45967	0.144404	0.374743
GO_BLOOD_VESSEL_ENDOTHELIAL_CELL_MIGRATION	Y	0.0107465	20	0.0447494	0.0445442	1.00461	0.315103	0.586039
GO_POSITIVE_REGULATION_OF_PROTEIN_LOCALIZATION_TO_NUCLEUS	Y	0.0444342	106	0.02619	0.0207851	1.26004	0.207676	0.468859
GO_POSITIVE_REGULATION_OF_BMP_SIGNALING_PATHWAY	Y	0.0152948	30	0.0147503	0.040407	0.365043	0.715085	0.869405
GO_REGULATION_OF_INTERFERON_GAMMA_BIOSYNTHETIC_PROCESS	Y	0.00620746	11	-0.239808	0.118371	-2.02591	0.0427931	0.173597
GO_PROXIMAL_DISTAL_PATTERN_FORMATION	Y	0.0144169	28	0.00521567	0.0431318	0.120924	0.903753	0.956438
GO_STRIATED_MUSCLE_CONTRACTION	Y	0.0368756	85	0.0456256	0.0218199	2.09101	0.0365449	0.155252
GO_NEGATIVE_REGULATION_OF_ANION_TRANSPORT	Y	0.0130738	25	0.00872345	0.0451314	0.19329	0.846735	0.930528
GO_NEGATIVE_REGULATION_OF_CD4_POSITIVE_ALPHA_BETA_T_CELL_DIFFERENTIATION	Y	0.00583884	10	0.070502	0.0576287	1.22338	0.221206	0.484813
GO_ECTODERM_DEVELOPMENT	Y	0.0107475	20	0.0441313	0.0445338	0.990964	0.32172	0.591218
GO_HYALURONAN_METABOLIC_PROCESS	Y	0.0121631	23	-0.0143802	0.050559	-0.284424	0.77609	0.897848
GO_LEUKOCYTE_MIGRATION	Y	0.0754293	202	0.00470437	0.0161916	0.290543	0.771405	0.896798
GO_NEGATIVE_REGULATION_OF_INTRACELLULAR_PROTEIN_TRANSPORT	Y	0.036635	84	0.0177459	0.023972	0.740275	0.459146	0.706927
GO_MEIOSIS_I	Y	0.0300571	67	-0.0916331	0.0369413	-2.4805	0.0131314	0.0769101
GO_SENSORY_PERCEPTION_OF_PAIN	Y	0.0295291	65	0.0237433	0.0266914	0.889548	0.373724	0.638845
GO_NEGATIVE_REGULATION_OF_GENE_EXPRESSION_EPIGENETIC	Y	0.0302346	67	0.0402263	0.0248787	1.61689	0.105924	0.311742
GO_ALDITOL_METABOLIC_PROCESS	Y	0.00836806	15	-0.0550809	0.0703605	-0.782838	0.433736	0.688796
GO_MITOCHONDRIAL_ELECTRON_TRANSPORT_UBIQUINOL_TO_CYTOCHROME_C	Y	0.00587543	10	-0.0398561	0.0839393	-0.47482	0.634923	0.825942
GO_REGULATION_OF_ANATOMICAL_STRUCTURE_SIZE	Y	0.134402	421	0.0398548	0.0101659	3.92044	8.8808e-05	0.00179662
GO_REGULATION_OF_CELL_PROLIFERATION_INVOLVED_IN_KIDNEY_DEVELOPMENT	Y	0.00689358	12	0.0351828	0.059481	0.591497	0.554197	0.776477
GO_POSITIVE_REGULATION_OF_MITOCHONDRION_ORGANIZATION	Y	0.0546466	136	0.00535395	0.0196433	0.272559	0.785197	0.902426
GO_POSITIVE_REGULATION_OF_CATALYTIC_ACTIVITY	Y	0.299298	1247	0.0330726	0.00633227	5.22286	1.787e-07	9.3426e-06
GO_POSITIVE_REGULATION_OF_SIGNAL_TRANSDUCTION_BY_P53_CLASS_MEDIATOR	Y	0.00685984	12	0.0650107	0.0533712	1.21809	0.223212	0.487151
GO_PEPTIDYL_LYSINE_MODIFICATION	Y	0.0930619	264	0.0457665	0.0124664	3.67118	0.000242329	0.00397028
GO_METHYLATION_DEPENDENT_CHROMATIN_SILENCING	Y	0.0047806	8	0.0833521	0.0617101	1.3507	0.176812	0.424294
GO_REGULATION_OF_LIPOPROTEIN_LIPASE_ACTIVITY	Y	0.00477599	8	-0.134621	0.115789	-1.16264	0.244996	0.51746
GO_HORMONE_MEDIATED_SIGNALING_PATHWAY	Y	0.0544712	137	0.0650642	0.0160738	4.04784	5.19701e-05	0.00113529
GO_KIDNEY_VASCULATURE_DEVELOPMENT	Y	0.00931879	17	0.0532385	0.0468779	1.13568	0.256108	0.528458
GO_ANDROGEN_BIOSYNTHETIC_PROCESS	Y	0.00583917	10	-0.0996033	0.0964302	-1.03291	0.301666	0.573651
GO_NEGATIVE_REGULATION_OF_PROTEIN_BINDING	Y	0.0310612	69	0.0194482	0.0262842	0.739921	0.45936	0.706927
GO_POSITIVE_REGULATION_OF_OLIGODENDROCYTE_DIFFERENTIATION	Y	0.00689672	12	0.0303298	0.0604958	0.501354	0.61613	0.815538
GO_AXONEMAL_DYNEIN_COMPLEX_ASSEMBLY	Y	0.00819341	15	-0.198472	0.0931678	-2.13027	0.033167	0.145453
GO_LIPOPROTEIN_TRANSPORT	Y	0.00639746	11	-0.00875029	0.0718468	-0.121791	0.903066	0.956438
GO_REGULATION_OF_LIPID_METABOLIC_PROCESS	Y	0.08421	232	0.0260096	0.0141453	1.83874	0.0659741	0.230291
GO_HEMIDESMOSOME_ASSEMBLY	Y	0.00690504	12	0.00232536	0.0664542	0.034992	0.972087	0.985429
GO_MAST_CELL_ACTIVATION	Y	0.00982787	18	-0.0284084	0.0595617	-0.476957	0.6334	0.825318
GO_RESPONSE_TO_EXTERNAL_STIMULUS	Y	0.326626	1412	0.013599	0.00629001	2.16201	0.0306345	0.137177
GO_PROTEIN_IMPORT_INTO_NUCLEUS_TRANSLOCATION	Y	0.012158	23	-0.0242529	0.0522085	-0.464539	0.642269	0.83044
GO_REGULATION_OF_ADENYLATE_CYCLASE_ACTIVITY	Y	0.0264051	57	0.0333815	0.0275887	1.20997	0.226312	0.49138
GO_POSITIVE_REGULATION_OF_LEUKOCYTE_DIFFERENTIATION	Y	0.0461335	111	0.0320511	0.0199171	1.60923	0.10759	0.314852
GO_MITOCHONDRIAL_MEMBRANE_ORGANIZATION	Y	0.0337023	76	0.00992209	0.0258378	0.384014	0.700974	0.862637
GO_POSITIVE_REGULATION_OF_NEUTROPHIL_MIGRATION	Y	0.0116906	22	-0.0361258	0.0551142	-0.655472	0.512174	0.742984
GO_INTRA_GOLGI_VESICLE_MEDIATED_TRANSPORT	Y	0.0170256	34	0.0198599	0.0373234	0.532103	0.594663	0.800607
GO_REGULATION_OF_SPINDLE_CHECKPOINT	Y	0.00676101	12	-0.185365	0.106673	-1.73769	0.0822874	0.264593
GO_POSITIVE_REGULATION_OF_STRIATED_MUSCLE_CONTRACTION	Y	0.00732607	13	-0.120322	0.0870768	-1.38179	0.167058	0.410028
GO_ANATOMICAL_STRUCTURE_REGRESSION	Y	0.00586427	10	-0.0622464	0.0884765	-0.703535	0.481734	0.72051
GO_CEREBRAL_CORTEX_NEURON_DIFFERENTIATION	Y	0.0107065	20	0.0639157	0.041947	1.52373	0.1276	0.349875
GO_OVARIAN_FOLLICLE_DEVELOPMENT	Y	0.0240619	51	-0.0203678	0.0346024	-0.588624	0.556123	0.777741
GO_REGULATION_OF_VENTRICULAR_CARDIAC_MUSCLE_CELL_ACTION_POTENTIAL	Y	0.00639755	11	0.00776594	0.0682041	0.113863	0.909348	0.957717
GO_REGULATION_OF_MYOBLAST_DIFFERENTIATION	Y	0.0198558	41	0.0620334	0.0296322	2.09345	0.0363272	0.154932
GO_GLUCAN_METABOLIC_PROCESS	Y	0.0199937	41	-0.00310913	0.0366098	-0.0849261	0.932321	0.966394
GO_CARDIAC_ATRIUM_DEVELOPMENT	Y	0.0142545	28	0.0782708	0.0333825	2.34467	0.019058	0.0989993
GO_NEGATIVE_REGULATION_OF_CELLULAR_RESPONSE_TO_GROWTH_FACTOR_STIMULUS	Y	0.0465038	113	0.063959	0.0177239	3.60862	0.000308901	0.00471251
GO_FATTY_ACID_HOMEOSTASIS	Y	0.00482376	8	0.0418976	0.0714841	0.586111	0.55781	0.778725
GO_NUCLEOTIDE_SUGAR_METABOLIC_PROCESS	Y	0.0139693	27	-0.0142769	0.0466629	-0.305959	0.759641	0.890462
GO_ENERGY_DERIVATION_BY_OXIDATION_OF_ORGANIC_COMPOUNDS	Y	0.0582876	148	-0.061021	0.0228693	-2.66825	0.00763351	0.0526984
GO_REGULATION_OF_PLATELET_AGGREGATION	Y	0.00837356	15	0.0397914	0.0524371	0.75884	0.447961	0.698774
GO_POSITIVE_REGULATION_OF_PROTEIN_IMPORT_INTO_NUCLEUS_TRANSLOCATION	Y	0.00736093	13	0.0628212	0.0526347	1.19353	0.232682	0.500309
GO_POSITIVE_REGULATION_OF_CARDIAC_MUSCLE_CONTRACTION	Y	0.00631793	11	-0.133531	0.0974571	-1.37015	0.170662	0.415318
GO_REGULATION_OF_SUBSTRATE_ADHESION_DEPENDENT_CELL_SPREADING	Y	0.0178682	36	0.0285988	0.0352582	0.811125	0.417308	0.674681
GO_NEPHRIC_DUCT_DEVELOPMENT	Y	0.00767247	14	0.118251	0.0404971	2.91998	0.00350611	0.0304365
GO_POST_GOLGI_VESICLE_MEDIATED_TRANSPORT	Y	0.033591	76	0.0437575	0.0230571	1.89779	0.0577438	0.212061
GO_ERROR_FREE_TRANSLESION_SYNTHESIS	Y	0.00838354	15	-0.0317315	0.0657883	-0.482327	0.629581	0.822877
GO_EYE_PHOTORECEPTOR_CELL_DIFFERENTIATION	Y	0.0190615	39	0.0541582	0.0310694	1.74313	0.0813323	0.262805
GO_RESPONSE_TO_TESTOSTERONE	Y	0.0152983	30	0.00736711	0.0413824	0.178025	0.858706	0.937484
GO_CENTRIOLE_ASSEMBLY	Y	0.00971533	18	-0.127094	0.0763489	-1.66465	0.0960041	0.293124
GO_REGULATION_OF_HEMOPOIESIS	Y	0.0913726	257	0.0277397	0.013389	2.07182	0.0383004	0.160262
GO_ATRIAL_SEPTUM_DEVELOPMENT	Y	0.00978314	18	0.0585535	0.0448313	1.30608	0.191545	0.446076
GO_DETECTION_OF_TEMPERATURE_STIMULUS	Y	0.00790183	14	-0.000444939	0.0620713	-0.0071682	0.994281	0.997625
GO_ION_TRANSMEMBRANE_TRANSPORT	Y	0.189678	659	-0.0052873	0.00939087	-0.563025	0.573427	0.787581
GO_ENAMEL_MINERALIZATION	Y	0.0058734	10	0.0375025	0.0647434	0.579249	0.56243	0.782056
GO_POSITIVE_REGULATION_OF_CALCIUM_MEDIATED_SIGNALING	Y	0.0152788	30	0.0301582	0.0384496	0.784357	0.432844	0.687615
GO_NEURAL_CREST_CELL_MIGRATION	Y	0.021855	46	0.0690991	0.0269433	2.56461	0.0103394	0.065726
GO_SPINAL_CORD_MOTOR_NEURON_CELL_FATE_SPECIFICATION	Y	0.00736971	13	-0.0752311	0.0792291	-0.949539	0.342363	0.607966
GO_REGULATION_OF_GLYCOPROTEIN_METABOLIC_PROCESS	Y	0.0173846	35	0.0520421	0.0331082	1.57188	0.116001	0.328318
GO_INTRACELLULAR_SIGNAL_TRANSDUCTION	Y	0.313088	1334	0.0384142	0.00608245	6.31557	2.77294e-10	2.63316e-08
GO_REGULATION_OF_BEHAVIOR	Y	0.0244026	52	0.0417522	0.0280559	1.48818	0.136727	0.363481
GO_PYRIMIDINE_NUCLEOTIDE_METABOLIC_PROCESS	Y	0.0181138	37	-0.111337	0.0518703	-2.14646	0.0318534	0.141291
GO_GLYCOLIPID_CATABOLIC_PROCESS	Y	0.00573325	10	-0.217485	0.118526	-1.83491	0.0665399	0.231398
GO_REGULATION_OF_T_CELL_DIFFERENTIATION_IN_THYMUS	Y	0.0117057	22	-0.00957014	0.0509685	-0.187766	0.851063	0.933741
GO_SYNAPTIC_VESICLE_ENDOCYTOSIS	Y	0.00933465	17	0.0426084	0.049066	0.868391	0.385195	0.648307
GO_POSITIVE_REGULATION_OF_PROTEIN_TYROSINE_KINASE_ACTIVITY	Y	0.0174443	35	0.027345	0.0358617	0.762513	0.445767	0.697429
GO_POSITIVE_REGULATION_OF_HEART_RATE	Y	0.0107744	20	0.0177467	0.0489444	0.36259	0.716917	0.870204
GO_PALATE_DEVELOPMENT	Y	0.033476	76	0.059478	0.0217514	2.73444	0.00625645	0.0455977
GO_INNATE_IMMUNE_RESPONSE_ACTIVATING_CELL_SURFACE_RECEPTOR_SIGNALING_PATHWAY	Y	0.0359219	82	0.00369024	0.0253782	0.14541	0.884389	0.95098
GO_PATTERNING_OF_BLOOD_VESSELS	Y	0.0152631	30	0.0392018	0.0370543	1.05796	0.290093	0.562653
GO_REGULATION_OF_HOMEOSTATIC_PROCESS	Y	0.120828	366	0.0250602	0.0113767	2.20277	0.027627	0.127782
GO_FATTY_ACID_BETA_OXIDATION_USING_ACYL_COA_OXIDASE	Y	0.00637939	11	-0.0564453	0.082429	-0.684775	0.493497	0.731203
GO_POSITIVE_REGULATION_OF_VASOCONSTRICTION	Y	0.0160056	32	-0.108316	0.0545813	-1.9845	0.0472199	0.184789
GO_GOLGI_TO_PLASMA_MEMBRANE_TRANSPORT	Y	0.0178444	36	0.0401331	0.0338553	1.18543	0.235867	0.504361
GO_PROTEIN_TARGETING_TO_MEMBRANE	Y	0.0412926	97	-0.0244026	0.0254396	-0.959237	0.337456	0.606014
GO_MITOTIC_CELL_CYCLE	Y	0.187876	651	0.0144909	0.00892532	1.62358	0.104489	0.308886
GO_REGULATION_OF_FEEDING_BEHAVIOR	Y	0.0098185	18	0.0358345	0.0484385	0.739793	0.459438	0.706927
GO_REGULATION_OF_THYMOCYTE_AGGREGATION	Y	0.0117057	22	-0.00957014	0.0509685	-0.187766	0.851063	0.933741
GO_PROTEIN_COMPLEX_BIOGENESIS	Y	0.236548	890	0.00162974	0.00799336	0.203887	0.838445	0.928381
GO_REGULATION_OF_MULTICELLULAR_ORGANISM_GROWTH	Y	0.0255664	55	0.0471531	0.0268908	1.7535	0.0795372	0.258983
GO_REGULATION_OF_KIDNEY_DEVELOPMENT	Y	0.0243139	52	0.0597797	0.0262144	2.28041	0.0225982	0.111623
GO_MACROMOLECULAR_COMPLEX_DISASSEMBLY	Y	0.055645	140	-0.0671508	0.0237932	-2.82227	0.00477524	0.0377877
GO_POSITIVE_REGULATION_OF_CELLULAR_COMPONENT_BIOGENESIS	Y	0.119178	360	0.0314612	0.0112429	2.79832	0.00514399	0.0398252
GO_POSITIVE_REGULATION_OF_MITOCHONDRIAL_MEMBRANE_PERMEABILITY	Y	0.00884699	16	0.0485733	0.0495493	0.980301	0.326954	0.598003
GO_COMPLEMENT_ACTIVATION	Y	0.0164606	33	-0.0975088	0.0528639	-1.84453	0.0651276	0.228536
GO_REGULATION_OF_CATECHOLAMINE_SECRETION	Y	0.0174571	35	-0.0175866	0.0413929	-0.424869	0.670938	0.845808
GO_BONE_DEVELOPMENT	Y	0.0558092	140	0.0379673	0.0174333	2.17786	0.0294333	0.132835
GO_NEGATIVE_REGULATION_OF_INTRACELLULAR_STEROID_HORMONE_RECEPTOR_SIGNALING_PATHWAY	Y	0.0135114	26	0.0267703	0.0417213	0.641647	0.521113	0.748259
GO_DERMATAN_SULFATE_PROTEOGLYCAN_METABOLIC_PROCESS	Y	0.00739858	13	0.0279816	0.0585431	0.477965	0.632682	0.824845
GO_REGULATION_OF_BIOMINERAL_TISSUE_DEVELOPMENT	Y	0.0295173	65	0.0281882	0.0263073	1.0715	0.283964	0.557407
GO_REGULATION_OF_AMINE_TRANSPORT	Y	0.0280141	61	0.00151251	0.0296037	0.051092	0.959253	0.979324
GO_SMOOTH_MUSCLE_TISSUE_DEVELOPMENT	Y	0.00915001	17	0.105953	0.0378548	2.79894	0.00513402	0.0398252
GO_NEGATIVE_REGULATION_OF_HEMATOPOIETIC_PROGENITOR_CELL_DIFFERENTIATION	Y	0.00835548	15	-0.0697019	0.0730258	-0.954483	0.339856	0.606623
GO_NEGATIVE_REGULATION_OF_NUCLEOSIDE_METABOLIC_PROCESS	Y	0.00786807	14	0.0534685	0.0517339	1.03353	0.301374	0.573535
GO_POSITIVE_REGULATION_OF_MAST_CELL_DEGRANULATION	Y	0.0063914	11	-0.0321045	0.0769097	-0.417431	0.67637	0.849204
GO_NEGATIVE_REGULATION_OF_CATION_CHANNEL_ACTIVITY	Y	0.01216	23	0.0191615	0.0454952	0.421177	0.673632	0.847596
GO_NCRNA_PROCESSING	Y	0.0954474	273	-0.0645651	0.017066	-3.78325	0.000155435	0.00281417
GO_NEGATIVE_REGULATION_OF_TRANSPORT	Y	0.123862	378	0.0280756	0.0110983	2.52972	0.0114261	0.0698628
GO_THYMOCYTE_AGGREGATION	Y	0.018647	38	0.0531983	0.0313646	1.69612	0.0898846	0.282033
GO_LEYDIG_CELL_DIFFERENTIATION	Y	0.00588151	10	-0.0218923	0.0784132	-0.279191	0.780102	0.899468
GO_AMINE_METABOLIC_PROCESS	Y	0.0434267	103	-0.014733	0.0239892	-0.614149	0.539127	0.762247
GO_DNA_MODIFICATION	Y	0.0279917	61	0.0225053	0.0276824	0.81298	0.416243	0.673456
GO_PROTEIN_LOCALIZATION_TO_MEMBRANE	Y	0.100465	289	0.00367099	0.0136256	0.269419	0.787611	0.904431
GO_RNA_SURVEILLANCE	Y	0.00478437	8	-0.12227	0.112681	-1.0851	0.277898	0.55259
GO_MITOTIC_SPINDLE_ASSEMBLY	Y	0.0186878	38	0.0405731	0.0329095	1.23287	0.217644	0.483388
GO_GLYCOGEN_BIOSYNTHETIC_PROCESS	Y	0.00982712	18	-0.02969	0.0598457	-0.496109	0.619825	0.818169
GO_REGULATION_OF_GRANULOCYTE_DIFFERENTIATION	Y	0.00790091	14	-0.0101827	0.0639887	-0.159133	0.873567	0.946227
GO_RESPONSE_TO_ALKALOID	Y	0.0480673	117	0.0470497	0.0184836	2.54548	0.0109233	0.068223
GO_REGULATION_OF_MESENCHYMAL_CELL_PROLIFERATION	Y	0.015283	31	0.113526	0.0280184	4.05183	5.10928e-05	0.00113502
GO_MORPHOGENESIS_OF_AN_EPITHELIAL_FOLD	Y	0.00738479	13	0.0450789	0.0552726	0.815573	0.414758	0.671492
GO_AUTOPHAGY	Y	0.111015	328	-0.00828589	0.0132769	-0.624081	0.532585	0.757236
GO_REGULATION_OF_CELL_PROJECTION_ORGANIZATION	Y	0.152078	498	0.0595522	0.00887095	6.71317	1.97766e-11	2.42159e-09
GO_REGULATION_OF_ACTIN_FILAMENT_LENGTH	Y	0.0524362	130	0.0461622	0.0175633	2.62833	0.00858997	0.0575095
GO_REGULATION_OF_TRANSPORTER_ACTIVITY	Y	0.0650159	169	0.0439836	0.0155728	2.82439	0.0047437	0.0376021
GO_EATING_BEHAVIOR	Y	0.0110987	21	-0.129727	0.0722864	-1.79462	0.0727355	0.24436
GO_REGULATION_OF_PHAGOCYTOSIS_ENGULFMENT	Y	0.00587523	10	-0.0403471	0.0826759	-0.488015	0.625547	0.821295
GO_GLUTATHIONE_DERIVATIVE_METABOLIC_PROCESS	Y	0.00676074	12	-0.185601	0.102539	-1.81005	0.0703095	0.239413
GO_CELL_JUNCTION_ORGANIZATION	Y	0.0642381	167	0.0542025	0.0150773	3.59498	0.000325531	0.00491784
GO_FOLIC_ACID_CONTAINING_COMPOUND_BIOSYNTHETIC_PROCESS	Y	0.00580446	10	-0.141746	0.111825	-1.26757	0.204973	0.465466
GO_EMBRYONIC_HEART_TUBE_DEVELOPMENT	Y	0.0299287	66	0.0145794	0.0272993	0.534059	0.593309	0.800003
GO_SPHINGOID_METABOLIC_PROCESS	Y	0.00737992	13	-0.0623924	0.077578	-0.804255	0.421264	0.676749
GO_PROTEIN_DESTABILIZATION	Y	0.0156885	31	0.0439674	0.0359228	1.22394	0.220995	0.484813
GO_NEGATIVE_REGULATION_OF_RESPONSE_TO_FOOD	Y	0.00531944	9	-0.104706	0.107751	-0.971743	0.331195	0.601738
GO_L_AMINO_ACID_IMPORT	Y	0.00677609	12	0.100367	0.0461006	2.17712	0.029488	0.132953
GO_EAR_DEVELOPMENT	Y	0.0673323	176	0.0317811	0.0158972	1.99917	0.0456093	0.18059
GO_NEGATIVE_REGULATION_OF_CELL_MATRIX_ADHESION	Y	0.0139983	28	0.114473	0.0287502	3.98165	6.87831e-05	0.00143519
GO_REGULATION_OF_MACROPHAGE_CHEMOTAXIS	Y	0.00773674	14	-0.183125	0.0978191	-1.87208	0.0612169	0.219616
GO_LAGGING_STRAND_ELONGATION	Y	0.00518893	9	-0.260779	0.148131	-1.76046	0.0783509	0.256737
GO_POSITIVE_REGULATION_OF_SMOOTH_MUSCLE_CELL_PROLIFERATION	Y	0.024596	53	0.0749587	0.024648	3.04117	0.00236095	0.0220344
GO_MEMBRANE_BUDDING	Y	0.0441088	105	0.0201536	0.0212871	0.94675	0.343782	0.60822
GO_REGULATION_OF_SYNAPTIC_PLASTICITY	Y	0.0512101	127	0.0635192	0.016767	3.78834	0.00015229	0.00278861
GO_LONG_TERM_SYNAPTIC_DEPRESSION	Y	0.00776831	14	0.0957123	0.0439308	2.17871	0.0293701	0.132679
GO_GLYCOSYLCERAMIDE_METABOLIC_PROCESS	Y	0.00639795	11	0.00253885	0.0693593	0.0366043	0.970801	0.985154
GO_CELLULAR_RESPONSE_TO_RETINOIC_ACID	Y	0.0282658	62	0.051331	0.0249216	2.0597	0.0394461	0.163149
GO_NCRNA_TRANSCRIPTION	Y	0.0329612	74	-0.00288626	0.0272632	-0.105867	0.91569	0.959452
GO_REGULATION_OF_INTERLEUKIN_1_BETA_PRODUCTION	Y	0.0165608	33	-0.0493816	0.0467922	-1.05534	0.291289	0.563563
GO_NEGATIVE_REGULATION_OF_SMOOTH_MUSCLE_CELL_MIGRATION	Y	0.0083583	15	0.0520538	0.0501724	1.0375	0.299521	0.57294
GO_NEGATIVE_REGULATION_OF_INTRINSIC_APOPTOTIC_SIGNALING_PATHWAY	Y	0.0340775	77	-0.00536387	0.0269361	-0.199133	0.842162	0.929013
GO_LIPOXYGENASE_PATHWAY	Y	0.00479077	8	-0.11247	0.109339	-1.02863	0.303669	0.57609
GO_NEGATIVE_REGULATION_OF_EPITHELIAL_CELL_APOPTOTIC_PROCESS	Y	0.0160258	32	0.0706345	0.0322909	2.18744	0.028727	0.130741
GO_VESICLE_DOCKING_INVOLVED_IN_EXOCYTOSIS	Y	0.0165877	33	-0.0294946	0.044105	-0.668736	0.503675	0.736981
GO_CD4_POSITIVE_ALPHA_BETA_T_CELL_ACTIVATION	Y	0.0150801	30	0.0860524	0.0318996	2.6976	0.00699243	0.0497489
GO_ARTERY_MORPHOGENESIS	Y	0.0226582	48	0.0692519	0.0264863	2.61463	0.00894194	0.0593535
GO_NEGATIVE_REGULATION_OF_DEFENSE_RESPONSE_TO_VIRUS	Y	0.00887227	16	-0.0246305	0.0625139	-0.394	0.693587	0.858957
GO_POSITIVE_REGULATION_OF_MOLECULAR_FUNCTION	Y	0.337604	1490	0.0348489	0.0058563	5.95067	2.73418e-09	2.05196e-07
GO_POSITIVE_REGULATION_OF_REGULATED_SECRETORY_PATHWAY	Y	0.0204062	42	-0.0107431	0.0370342	-0.290086	0.771755	0.896847
GO_SPROUTING_ANGIOGENESIS	Y	0.0207928	43	0.0303959	0.0320138	0.949463	0.342402	0.607966
GO_LYMPHOCYTE_ACTIVATION	Y	0.0995755	286	0.017991	0.0131014	1.37322	0.169707	0.414078
GO_METALLO_SULFUR_CLUSTER_ASSEMBLY	Y	0.00732468	13	-0.121616	0.0877359	-1.38616	0.165721	0.407774
GO_NEGATIVE_REGULATION_OF_RETINOIC_ACID_RECEPTOR_SIGNALING_PATHWAY	Y	0.00466518	8	0.130192	0.0559271	2.32789	0.0199322	0.101364
GO_SPLICEOSOMAL_TRI_SNRNP_COMPLEX_ASSEMBLY	Y	0.0058679	10	-0.0556776	0.0861576	-0.646229	0.518142	0.746576
GO_REGULATION_OF_T_CELL_TOLERANCE_INDUCTION	Y	0.00479481	8	0.0734491	0.0626038	1.17324	0.24072	0.511448
GO_POSITIVE_REGULATION_OF_RESPONSE_TO_OXIDATIVE_STRESS	Y	0.00587603	10	0.0330583	0.0656081	0.503876	0.614356	0.814648
GO_PROTEIN_TRIMERIZATION	Y	0.017035	34	-0.00324738	0.0402094	-0.0807618	0.935633	0.967014
GO_REGULATION_OF_PEPTIDYL_SERINE_PHOSPHORYLATION	Y	0.0373955	87	0.0670897	0.0198312	3.38303	0.000718862	0.00873333
GO_PROTEOGLYCAN_METABOLIC_PROCESS	Y	0.0340606	77	0.0182745	0.024988	0.731331	0.464589	0.70959
GO_NITROGEN_COMPOUND_TRANSPORT	Y	0.135048	422	0.0191796	0.0108144	1.77352	0.0761639	0.251519
GO_DOPAMINE_METABOLIC_PROCESS	Y	0.0107764	20	0.0133037	0.0497068	0.267644	0.788978	0.904534
GO_DEFENSE_RESPONSE_TO_OTHER_ORGANISM	Y	0.105957	310	-0.0373712	0.0148286	-2.5202	0.0117397	0.0711401
GO_POSITIVE_REGULATION_OF_GLYCOGEN_METABOLIC_PROCESS	Y	0.00675872	12	0.10549	0.046804	2.25386	0.0242202	0.116932
GO_LEUKOCYTE_PROLIFERATION	Y	0.0310297	69	0.0310252	0.0252814	1.22719	0.21977	0.484564
GO_POSITIVE_REGULATION_OF_MICROTUBULE_POLYMERIZATION_OR_DEPOLYMERIZATION	Y	0.0112399	21	-0.0192987	0.0537229	-0.359226	0.719432	0.871068
GO_L_ASCORBIC_ACID_METABOLIC_PROCESS	Y	0.00588162	10	0.0196643	0.068768	0.285952	0.774919	0.89694
GO_CEREBELLAR_GRANULAR_LAYER_DEVELOPMENT	Y	0.00736575	13	0.0598156	0.0522568	1.14465	0.252375	0.525049
GO_REGULATION_OF_GENE_EXPRESSION_BY_GENETIC_IMPRINTING	Y	0.00817374	15	0.113086	0.0408796	2.76631	0.00567692	0.0427423
GO_ADHERENS_JUNCTION_ASSEMBLY	Y	0.0155783	31	0.0741206	0.0319472	2.3201	0.02035	0.102699
GO_SECRETORY_GRANULE_ORGANIZATION	Y	0.0125511	24	0.0585398	0.0393992	1.48581	0.137351	0.364156
GO_NEGATIVE_REGULATION_OF_POTASSIUM_ION_TRANSPORT	Y	0.0139725	27	0.00360828	0.0441487	0.0817301	0.934863	0.967014
GO_POSITIVE_REGULATION_OF_INTERLEUKIN_12_PRODUCTION	Y	0.0130741	25	-0.00817254	0.0476048	-0.171675	0.863696	0.940107
GO_REGULATION_OF_T_CELL_APOPTOTIC_PROCESS	Y	0.0126219	24	0.0035902	0.0468225	0.0766769	0.938882	0.969296
GO_VESICLE_FUSION_TO_PLASMA_MEMBRANE	Y	0.00687783	12	-0.066628	0.0808799	-0.82379	0.410073	0.667624
GO_VENTRICULAR_CARDIAC_MUSCLE_TISSUE_DEVELOPMENT	Y	0.0199217	41	0.0465225	0.0309843	1.50148	0.133253	0.358811
GO_CELLULAR_RESPONSE_TO_INTERFERON_GAMMA	Y	0.034427	78	-0.0218209	0.0281406	-0.775424	0.438102	0.691717
GO_NEGATIVE_REGULATION_OF_HISTONE_METHYLATION	Y	0.00832856	15	0.068473	0.0483453	1.41633	0.1567	0.39391
GO_ARACHIDONIC_ACID_SECRETION	Y	0.00513783	9	-0.317289	0.16196	-1.95905	0.0501268	0.192125
GO_REGULATION_OF_GLIAL_CELL_PROLIFERATION	Y	0.0106766	20	0.0740747	0.0406324	1.82304	0.0683179	0.234947
GO_IN_UTERO_EMBRYONIC_DEVELOPMENT	Y	0.0966416	276	0.032892	0.0127214	2.58557	0.0097317	0.0635977
GO_NEGATIVE_REGULATION_OF_BLOOD_CIRCULATION	Y	0.0165798	33	0.0314692	0.0364344	0.86372	0.387756	0.649774
GO_ER_NUCLEUS_SIGNALING_PATHWAY	Y	0.0157272	31	-0.0225762	0.0446455	-0.505678	0.613091	0.813664
GO_ETHANOL_METABOLIC_PROCESS	Y	0.00579982	10	-0.146993	0.107959	-1.36156	0.173358	0.419531
GO_DICARBOXYLIC_ACID_BIOSYNTHETIC_PROCESS	Y	0.00688525	12	-0.0557137	0.0791041	-0.704309	0.481252	0.720267
GO_PROTEIN_HETEROTRIMERIZATION	Y	0.0074013	13	-0.025104	0.0694259	-0.361594	0.717661	0.87062
GO_VESICLE_CYTOSKELETAL_TRAFFICKING	Y	0.0171843	35	0.0892633	0.0287883	3.10068	0.00193459	0.0190467
GO_REGULATION_OF_TRANSCRIPTION_FACTOR_IMPORT_INTO_NUCLEUS	Y	0.0344441	78	0.0100021	0.0254979	0.39227	0.694865	0.859452
GO_EPITHELIAL_CILIUM_MOVEMENT	Y	0.00834266	15	-0.0828122	0.0837367	-0.98896	0.3227	0.592317
GO_NEGATIVE_REGULATION_OF_MEIOTIC_CELL_CYCLE	Y	0.00935894	17	0.00615538	0.0551659	0.111579	0.911159	0.95802
GO_MESENCHYMAL_CELL_DIFFERENTIATION	Y	0.0492041	121	0.0639138	0.0170604	3.74632	0.000180169	0.00317548
GO_NEGATIVE_REGULATION_OF_DNA_BIOSYNTHETIC_PROCESS	Y	0.0139718	27	-0.00739312	0.0456933	-0.161799	0.871467	0.944848
GO_SHORT_CHAIN_FATTY_ACID_METABOLIC_PROCESS	Y	0.00729922	13	-0.144416	0.0958884	-1.50608	0.132068	0.357387
GO_ATRIAL_SEPTUM_MORPHOGENESIS	Y	0.00789111	14	0.0317008	0.0558555	0.56755	0.57035	0.786803
GO_REGULATION_OF_SMALL_GTPASE_MEDIATED_SIGNAL_TRANSDUCTION	Y	0.0869543	245	0.072151	0.0118663	6.08035	1.23035e-09	1.04088e-07
GO_CELLULAR_RESPONSE_TO_GROWTH_HORMONE_STIMULUS	Y	0.00887377	16	0.0193655	0.0544662	0.35555	0.722183	0.87213
GO_REGULATION_OF_INTERLEUKIN_2_BIOSYNTHETIC_PROCESS	Y	0.00786064	14	0.0583686	0.0501846	1.16308	0.244817	0.517319
GO_RNA_MODIFICATION	Y	0.0413305	98	-0.0868301	0.0300127	-2.89311	0.00382039	0.0324385
GO_CELLULAR_COMPONENT_ASSEMBLY_INVOLVED_IN_MORPHOGENESIS	Y	0.0729772	194	0.0151818	0.0159919	0.949343	0.342463	0.607966
GO_ORGANELLE_FISSION	Y	0.135635	424	-0.00779622	0.0116991	-0.666395	0.50517	0.73824
GO_EMBRYONIC_FORELIMB_MORPHOGENESIS	Y	0.0152851	30	0.0253884	0.0389543	0.651749	0.514574	0.744335
GO_REGULATION_OF_FIBROBLAST_APOPTOTIC_PROCESS	Y	0.00634407	11	0.0727285	0.0547739	1.32779	0.184268	0.436113
GO_NOSE_DEVELOPMENT	Y	0.00784509	14	0.0670699	0.0490234	1.36812	0.171296	0.416645
GO_CELL_DIFFERENTIATION_INVOLVED_IN_KIDNEY_DEVELOPMENT	Y	0.0161366	32	0.0375155	0.0361858	1.03675	0.299871	0.57294
GO_REGULATION_OF_TRANSCRIPTION_FROM_RNA_POLYMERASE_III_PROMOTER	Y	0.0112366	21	-0.0253415	0.0547181	-0.463127	0.64328	0.830848
GO_MUSCLE_STRUCTURE_DEVELOPMENT	Y	0.123185	379	0.0604771	0.0100711	6.00503	1.96029e-09	1.54597e-07
GO_NEGATIVE_REGULATION_OF_CELL_CYCLE_PROCESS	Y	0.06882	181	0.0377053	0.0153854	2.45073	0.014269	0.0812651
GO_RESPONSE_TO_INCREASED_OXYGEN_LEVELS	Y	0.0102965	19	-0.0344651	0.0590141	-0.584014	0.55922	0.779992
GO_REGULATION_OF_CHROMATIN_SILENCING	Y	0.00918984	17	0.0974687	0.0397592	2.45148	0.0142392	0.0811948
GO_MACROMOLECULAR_COMPLEX_REMODELING	Y	0.00787006	14	-0.066603	0.0745545	-0.893347	0.371687	0.637706
GO_RIBOSOMAL_LARGE_SUBUNIT_ASSEMBLY	Y	0.0052875	9	-0.147033	0.109979	-1.33691	0.181272	0.431216
GO_MAINTENANCE_OF_LOCATION_IN_CELL	Y	0.0351656	80	0.0196723	0.0243985	0.806289	0.42009	0.676749
GO_CEREBELLAR_CORTEX_DEVELOPMENT	Y	0.0214666	45	0.0665948	0.0274825	2.42317	0.0153982	0.0856009
GO_CENTRAL_NERVOUS_SYSTEM_MYELINATION	Y	0.00683021	12	0.0804729	0.0508337	1.58306	0.11343	0.323225
GO_REGULATION_OF_MICROTUBULE_POLYMERIZATION	Y	0.0152874	30	0.0233615	0.0392676	0.594931	0.5519	0.77419
GO_REGULATION_OF_MESODERM_DEVELOPMENT	Y	0.00690381	12	-0.0130076	0.0696798	-0.186678	0.851916	0.934016
GO_T_HELPER_1_TYPE_IMMUNE_RESPONSE	Y	0.00838152	15	-0.0354387	0.0666283	-0.531887	0.594813	0.800607
GO_POSITIVE_REGULATION_OF_TYPE_2_IMMUNE_RESPONSE	Y	0.00790041	14	0.0120755	0.0596068	0.202586	0.839461	0.928456
GO_PLASMA_LIPOPROTEIN_PARTICLE_CLEARANCE	Y	0.00790176	14	-0.00277907	0.0625271	-0.0444459	0.96455	0.982283
GO_CELLULAR_RESPONSE_TO_OXYGEN_LEVELS	Y	0.050334	124	0.0550271	0.017469	3.14999	0.0016362	0.0168808
GO_DNA_CATABOLIC_PROCESS	Y	0.0107744	20	-0.0192371	0.055039	-0.349518	0.726705	0.873802
GO_REGULATION_OF_INTRACELLULAR_ESTROGEN_RECEPTOR_SIGNALING_PATHWAY	Y	0.0125774	24	0.0476872	0.0402264	1.18547	0.235851	0.504361
GO_CELLULAR_RESPONSE_TO_HORMONE_STIMULUS	Y	0.151044	490	0.0396748	0.00947712	4.18637	2.85181e-05	0.000729093
GO_RESPONSE_TO_PROSTAGLANDIN	Y	0.0139473	27	0.0348938	0.0396916	0.879123	0.37935	0.643263
GO_CELL_FATE_COMMITMENT_INVOLVED_IN_FORMATION_OF_PRIMARY_GERM_LAYER	Y	0.0126215	24	0.00591663	0.046479	0.127297	0.898707	0.955595
GO_DNA_REPAIR	Y	0.122227	371	-0.0156095	0.0127782	-1.22157	0.22189	0.485176
GO_T_CELL_DIFFERENTIATION_INVOLVED_IN_IMMUNE_RESPONSE	Y	0.0128801	25	0.0883397	0.0346997	2.54584	0.0109123	0.068223
GO_INSULIN_LIKE_GROWTH_FACTOR_RECEPTOR_SIGNALING_PATHWAY	Y	0.00718973	14	0.178251	0.0323034	5.51802	3.4893e-08	2.19402e-06
GO_PROTEIN_HETEROTETRAMERIZATION	Y	0.00981647	18	-0.044735	0.0622708	-0.718395	0.472526	0.71443
GO_NEGATIVE_REGULATION_OF_HEART_CONTRACTION	Y	0.0103091	19	-0.00634344	0.0542808	-0.116863	0.90697	0.957237
GO_SUBSTRATE_INDEPENDENT_TELENCEPHALIC_TANGENTIAL_MIGRATION	Y	0.00688722	12	0.043056	0.0580097	0.742221	0.457966	0.706633
GO_SULFUR_COMPOUND_CATABOLIC_PROCESS	Y	0.0161439	32	-0.0392517	0.0460255	-0.852825	0.393771	0.654447
GO_CHLORIDE_TRANSPORT	Y	0.032443	73	-0.061699	0.0324976	-1.89857	0.0576409	0.211851
GO_MICROTUBULE_DEPOLYMERIZATION	Y	0.0068318	12	-0.119621	0.0911104	-1.31292	0.189231	0.442904
GO_PROTEIN_POLYMERIZATION	Y	0.0264463	57	0.013585	0.0294618	0.461106	0.64473	0.831812
GO_PURINE_NUCLEOSIDE_BISPHOSPHATE_METABOLIC_PROCESS	Y	0.0152157	30	-0.0749662	0.0526944	-1.42266	0.154857	0.389909
GO_CELLULAR_RESPONSE_TO_CORTICOSTEROID_STIMULUS	Y	0.0236558	50	0.0220331	0.0305871	0.720339	0.471328	0.713747
GO_SIGNAL_TRANSDUCTION_IN_RESPONSE_TO_DNA_DAMAGE	Y	0.0358564	82	0.0325879	0.023109	1.41018	0.158507	0.396738
GO_COBALAMIN_METABOLIC_PROCESS	Y	0.00836816	15	-0.05496	0.0708335	-0.775904	0.437819	0.691717
GO_NEGATIVE_REGULATION_OF_SYSTEMIC_ARTERIAL_BLOOD_PRESSURE	Y	0.00690459	12	-0.00798312	0.068626	-0.116328	0.907394	0.957237
GO_MUSCLE_CONTRACTION	Y	0.0717801	190	0.00761761	0.0165386	0.460595	0.645096	0.831938
GO_TELOMERE_LOCALIZATION	Y	0.00483362	8	-0.0166116	0.0862581	-0.19258	0.847291	0.930919
GO_TRANSITION_METAL_ION_HOMEOSTASIS	Y	0.0370112	85	0.0108928	0.0243647	0.447074	0.654829	0.837688
GO_REGULATION_OF_ADHERENS_JUNCTION_ORGANIZATION	Y	0.0209013	44	0.0874469	0.0256198	3.41325	0.000643753	0.00800904
GO_ENZYME_LINKED_RECEPTOR_PROTEIN_SIGNALING_PATHWAY	Y	0.178668	613	0.0467444	0.00837841	5.57915	2.46174e-08	1.5909e-06
GO_PYRIMIDINE_NUCLEOTIDE_CATABOLIC_PROCESS	Y	0.00685567	12	-0.0941601	0.0876887	-1.0738	0.282931	0.556929
GO_PROTEIN_KINASE_C_ACTIVATING_G_PROTEIN_COUPLED_RECEPTOR_SIGNALING_PATHWAY	Y	0.0157285	31	-0.0208546	0.0444222	-0.469463	0.638746	0.828571
GO_REGULATION_OF_DEFENSE_RESPONSE_TO_VIRUS_BY_VIRUS	Y	0.0139725	27	-0.00312648	0.0450946	-0.0693316	0.944727	0.970546
GO_RIBONUCLEOSIDE_BISPHOSPHATE_BIOSYNTHETIC_PROCESS	Y	0.00931345	17	-0.0735845	0.0705342	-1.04325	0.296852	0.57053
GO_REGULATION_OF_RECEPTOR_INTERNALIZATION	Y	0.0161683	32	0.0125723	0.0393998	0.319096	0.749659	0.885309
GO_REGULATION_OF_CALCIUM_ION_TRANSMEMBRANE_TRANSPORT	Y	0.0400783	94	0.0487052	0.0204466	2.38207	0.0172288	0.0926772
GO_PROTEIN_LOCALIZATION_TO_CHROMOSOME_CENTROMERIC_REGION	Y	0.00690474	12	-0.00671757	0.0683633	-0.0982629	0.921725	0.962259
GO_RESPONSE_TO_BACTERIUM	Y	0.120872	366	-0.0237371	0.013165	-1.80305	0.0714022	0.241099
GO_REGULATION_OF_ANTIGEN_PROCESSING_AND_PRESENTATION	Y	0.00830868	15	-0.113122	0.0804203	-1.40663	0.159558	0.398072
GO_VASOCONSTRICTION	Y	0.0134894	26	-0.0504635	0.0530114	-0.951935	0.341146	0.607501
GO_REGULATION_OF_MITOCHONDRIAL_TRANSLATION	Y	0.00403352	7	-0.444012	0.197351	-2.24986	0.0244733	0.117411
GO_POSITIVE_REGULATION_OF_LEUKOCYTE_MIGRATION	Y	0.0380594	88	-0.0301612	0.0271536	-1.11076	0.266691	0.540467
GO_CALCIUM_ION_IMPORT	Y	0.0256614	55	0.0109635	0.0302497	0.362432	0.717034	0.870204
GO_CELL_MATURATION	Y	0.0465153	112	0.0244161	0.0203514	1.19972	0.230268	0.496495
GO_BEHAVIORAL_RESPONSE_TO_PAIN	Y	0.00639329	11	-0.0268274	0.0757659	-0.354082	0.723283	0.872961
GO_REGULATION_OF_SECRETION	Y	0.172422	581	0.0198692	0.00927039	2.1433	0.0321063	0.142006
GO_CELLULAR_RESPONSE_TO_TOXIC_SUBSTANCE	Y	0.0106007	20	0.0931759	0.0378323	2.46287	0.013795	0.0796039
GO_MODULATION_OF_TRANSCRIPTION_IN_OTHER_ORGANISM_INVOLVED_IN_SYMBIOTIC_INTERACTION	Y	0.0105033	20	0.110742	0.0361666	3.062	0.00220282	0.0209856
GO_APOPTOTIC_SIGNALING_PATHWAY	Y	0.0854546	236	0.0142528	0.0145602	0.978891	0.327651	0.598981
GO_NEURAL_NUCLEUS_DEVELOPMENT	Y	0.0258871	56	0.0598398	0.0255208	2.34475	0.0190538	0.0989993
GO_LYMPHOCYTE_MEDIATED_IMMUNITY	Y	0.0360601	83	-0.0745335	0.0313936	-2.37416	0.0176024	0.0943593
GO_REGULATION_OF_HEART_MORPHOGENESIS	Y	0.0121275	23	0.0455072	0.0414465	1.09797	0.272235	0.545293
GO_S_ADENOSYLMETHIONINE_METABOLIC_PROCESS	Y	0.00790114	14	-0.00876813	0.0636903	-0.137668	0.890505	0.952674
GO_FC_EPSILON_RECEPTOR_SIGNALING_PATHWAY	Y	0.0434058	103	0.0216048	0.0213944	1.00984	0.312592	0.584367
GO_HIPPOCAMPUS_DEVELOPMENT	Y	0.0300128	68	0.0985519	0.0200191	4.92289	8.62451e-07	3.68164e-05
GO_REGULATION_OF_PROTEIN_LOCALIZATION_TO_CELL_SURFACE	Y	0.013514	26	-0.0270369	0.04938	-0.547527	0.584026	0.795565
GO_RIBONUCLEOSIDE_TRIPHOSPHATE_BIOSYNTHETIC_PROCESS	Y	0.0170331	35	-0.188601	0.0656859	-2.87125	0.00409459	0.033969
GO_PRIMARY_AMINO_COMPOUND_METABOLIC_PROCESS	Y	0.006822	12	0.0840134	0.0492004	1.70757	0.0877374	0.27715
GO_POSITIVE_REGULATION_OF_TELOMERE_CAPPING	Y	0.00790127	14	-0.00792076	0.0635351	-0.124668	0.900789	0.956279
GO_NEGATIVE_REGULATION_OF_AMINE_TRANSPORT	Y	0.0116869	22	-0.0402761	0.0557996	-0.721798	0.47043	0.713233
GO_REGULATION_OF_CHROMOSOME_SEGREGATION	Y	0.0321834	72	0.0233256	0.025394	0.918548	0.358348	0.621003
GO_POSITIVE_REGULATION_OF_INSULIN_RECEPTOR_SIGNALING_PATHWAY	Y	0.00627451	11	0.102093	0.0472158	2.16225	0.0306154	0.137177
GO_PONS_DEVELOPMENT	Y	0.00536056	9	-0.0239759	0.0831788	-0.288246	0.773163	0.89694
GO_PROTEIN_K11_LINKED_UBIQUITINATION	Y	0.0107164	20	0.0599545	0.0419927	1.42774	0.15339	0.388527
GO_DETECTION_OF_CHEMICAL_STIMULUS_INVOLVED_IN_SENSORY_PERCEPTION_OF_TASTE	Y	0.00964672	18	-0.169829	0.085903	-1.97698	0.0480634	0.186989
GO_REGULATION_OF_MESENCHYMAL_CELL_APOPTOTIC_PROCESS	Y	0.00588242	10	0.016711	0.0694978	0.240454	0.809982	0.914768
GO_RESPONSE_TO_INACTIVITY	Y	0.00536076	9	0.0211242	0.0721664	0.292715	0.769744	0.896301
GO_NEGATIVE_REGULATION_OF_STRESS_ACTIVATED_MAPK_CASCADE	Y	0.0182904	37	0.029589	0.034699	0.852734	0.393822	0.654447
GO_SPHINGOLIPID_METABOLIC_PROCESS	Y	0.0492666	120	0.0187813	0.0200194	0.938155	0.348181	0.611122
GO_RESPONSE_TO_PAIN	Y	0.0126168	24	-0.0189533	0.050165	-0.37782	0.70557	0.865775
GO_PROTEIN_ACETYLATION	Y	0.0453632	109	0.0436886	0.0193552	2.2572	0.0240108	0.11657
GO_POSITIVE_REGULATION_OF_TRANSCRIPTION_ELONGATION_FROM_RNA_POLYMERASE_II_PROMOTER	Y	0.00637455	11	-0.0642678	0.086403	-0.743815	0.457001	0.706219
GO_REGULATION_OF_NUCLEOCYTOPLASMIC_TRANSPORT	Y	0.0713454	189	0.0310252	0.0153847	2.01662	0.0437539	0.176152
GO_NEGATIVE_REGULATION_OF_CALCIUM_ION_IMPORT	Y	0.00886087	16	0.0371195	0.0511796	0.725279	0.468293	0.710919
GO_CELLULAR_HORMONE_METABOLIC_PROCESS	Y	0.031068	69	-0.0167553	0.0294458	-0.569021	0.569351	0.786343
GO_PTERIDINE_CONTAINING_COMPOUND_METABOLIC_PROCESS	Y	0.0154409	31	-0.159056	0.0632131	-2.51618	0.0118745	0.0716627
GO_BONE_REMODELING	Y	0.0157328	31	0.0134327	0.0399133	0.336548	0.736462	0.878431
GO_REGULATION_OF_MAST_CELL_DEGRANULATION	Y	0.0126197	24	0.0120614	0.0455421	0.264841	0.791136	0.905427
GO_EMBRYONIC_CAMERA_TYPE_EYE_MORPHOGENESIS	Y	0.0125805	24	0.0461571	0.0405887	1.13719	0.255478	0.52831
GO_REGULATION_OF_TRANSFORMING_GROWTH_FACTOR_BETA_RECEPTOR_SIGNALING_PATHWAY	Y	0.0380218	89	0.0737853	0.0191811	3.84678	0.000120213	0.00230563
GO_FORMATION_OF_TRANSLATION_PREINITIATION_COMPLEX	Y	0.00776661	14	-0.160272	0.0912984	-1.75547	0.0792002	0.258066
GO_CHEMOKINE_MEDIATED_SIGNALING_PATHWAY	Y	0.0214148	45	-0.107396	0.0463021	-2.31946	0.0203844	0.102761
GO_POSITIVE_REGULATION_OF_INTERFERON_BETA_PRODUCTION	Y	0.0125463	24	0.0602523	0.0389116	1.54844	0.121539	0.339991
GO_NEGATIVE_REGULATION_OF_LEUKOCYTE_MIGRATION	Y	0.0143659	28	0.0474188	0.0375172	1.26392	0.206279	0.467209
GO_REGULATION_OF_PROTEIN_SECRETION	Y	0.108814	320	0.0187101	0.0123806	1.51124	0.130749	0.355568
GO_REGULATION_OF_PEPTIDYL_TYROSINE_PHOSPHORYLATION	Y	0.0704852	186	0.0236588	0.0158774	1.49009	0.136222	0.36334
GO_REGULATION_OF_NATURAL_KILLER_CELL_ACTIVATION	Y	0.0121295	23	-0.0546049	0.0566661	-0.963625	0.335251	0.604331
GO_RESPONSE_TO_INSULIN	Y	0.0706298	187	0.0404361	0.015012	2.69358	0.0070773	0.0501396
GO_POSITIVE_REGULATION_OF_FILOPODIUM_ASSEMBLY	Y	0.013292	26	0.0935127	0.032863	2.84554	0.0044401	0.0358055
GO_REGULATION_OF_MUSCLE_CELL_APOPTOTIC_PROCESS	Y	0.0191195	39	0.0357139	0.0331094	1.07866	0.280757	0.555899
GO_POSITIVE_REGULATION_OF_NIK_NF_KAPPAB_SIGNALING	Y	0.0129938	25	0.0610392	0.0380694	1.60337	0.108876	0.316427
GO_REGULATION_OF_CATABOLIC_PROCESS	Y	0.17998	615	0.0187526	0.00905348	2.07132	0.0383475	0.160315
GO_REGULATION_OF_CARBOHYDRATE_METABOLIC_PROCESS	Y	0.0540217	135	0.0516907	0.0169353	3.05224	0.00227567	0.0213482
GO_NEGATIVE_REGULATION_OF_SYNAPTIC_TRANSMISSION	Y	0.0262475	57	0.0640525	0.0246616	2.59726	0.00940693	0.0620857
GO_NEGATIVE_REGULATION_OF_CYTOKINE_BIOSYNTHETIC_PROCESS	Y	0.0125952	24	-0.0450169	0.0543987	-0.827538	0.407946	0.665925
GO_ROSTROCAUDAL_NEURAL_TUBE_PATTERNING	Y	0.00634758	11	-0.100391	0.0906598	-1.10734	0.268167	0.540935
GO_B_CELL_ACTIVATION	Y	0.0434294	103	0.0124997	0.022035	0.567267	0.570542	0.786821
GO_CELL_DEATH_IN_RESPONSE_TO_OXIDATIVE_STRESS	Y	0.00886371	16	0.0341579	0.0517956	0.659474	0.509602	0.741707
GO_SEROTONIN_RECEPTOR_SIGNALING_PATHWAY	Y	0.00639781	11	-0.00512052	0.0710578	-0.0720614	0.942554	0.969605
GO_REGULATION_OF_NEURON_DIFFERENTIATION	Y	0.152495	502	0.068174	0.00863916	7.89128	3.21163e-15	7.47186e-13
GO_NEGATIVE_REGULATION_OF_INTERFERON_GAMMA_PRODUCTION	Y	0.0139565	27	-0.0321058	0.0491557	-0.653144	0.513674	0.743759
GO_REGULATION_OF_FIBRINOLYSIS	Y	0.00536087	9	0.020738	0.0723112	0.286788	0.774279	0.89694
GO_NEGATIVE_REGULATION_OF_NF_KAPPAB_TRANSCRIPTION_FACTOR_ACTIVITY	Y	0.025666	55	-3.20426e-05	0.0313217	-0.00102302	0.999184	0.999399
GO_PROTEIN_POLYUBIQUITINATION	Y	0.0753979	204	0.0606048	0.0134196	4.51614	6.34911e-06	0.000200969
GO_RIBONUCLEOPROTEIN_COMPLEX_LOCALIZATION	Y	0.0394639	92	-0.0396806	0.0272825	-1.45443	0.145849	0.376743
GO_REGULATION_OF_MRNA_3_END_PROCESSING	Y	0.0126899	25	0.115701	0.0314694	3.67661	0.000237235	0.00392831
GO_REGULATION_OF_PEPTIDE_TRANSPORT	Y	0.0802742	219	0.0373394	0.0140387	2.65975	0.00782877	0.0533342
GO_POSITIVE_REGULATION_OF_ION_TRANSPORT	Y	0.0732337	195	0.0236504	0.0155216	1.52371	0.127603	0.349875
GO_ATP_BIOSYNTHETIC_PROCESS	Y	0.0119174	23	-0.172799	0.075719	-2.28211	0.0224977	0.111408
GO_CANONICAL_WNT_SIGNALING_PATHWAY	Y	0.0374357	87	0.0636305	0.0200426	3.17476	0.00150283	0.0158205
GO_ACUTE_INFLAMMATORY_RESPONSE	Y	0.0256656	55	0.00333923	0.0309901	0.107752	0.914194	0.959098
GO_NUCLEOBASE_METABOLIC_PROCESS	Y	0.017032	34	0.0117229	0.0383489	0.30569	0.759845	0.890462
GO_HUMORAL_IMMUNE_RESPONSE	Y	0.040203	94	-0.0324754	0.0264393	-1.2283	0.219356	0.484564
GO_NEGATIVE_REGULATION_OF_INTERLEUKIN_10_PRODUCTION	Y	0.00790114	14	-0.00881312	0.0637014	-0.13835	0.889965	0.952674
GO_PHAGOSOME_MATURATION	Y	0.0176071	36	-0.140353	0.0553794	-2.53439	0.011275	0.0693951
GO_REGULATION_OF_CELLULAR_RESPONSE_TO_HYPOXIA	Y	0.00638467	11	0.0391886	0.061478	0.637441	0.523848	0.74967
GO_REGULATION_OF_FEMALE_GONAD_DEVELOPMENT	Y	0.00534999	9	0.0434679	0.0667523	0.651182	0.51494	0.744335
GO_REGULATION_OF_THYMOCYTE_APOPTOTIC_PROCESS	Y	0.00588182	10	0.0190011	0.0690059	0.275354	0.783048	0.901153
GO_CHROMATIN_MODIFICATION	Y	0.145157	468	0.0568327	0.0091993	6.17794	6.67388e-10	5.97184e-08
GO_MYELOID_LEUKOCYTE_ACTIVATION	Y	0.0351877	80	-0.00150675	0.0261139	-0.0576992	0.953989	0.975585
GO_REACTIVE_NITROGEN_SPECIES_METABOLIC_PROCESS	Y	0.00983405	18	-0.0146091	0.0572689	-0.255096	0.798653	0.908812
GO_ANTERIOR_POSTERIOR_PATTERN_SPECIFICATION	Y	0.0676193	177	0.0342671	0.0157185	2.18006	0.0292699	0.132354
GO_POSITIVE_REGULATION_OF_CELL_DIVISION	Y	0.0461395	111	0.0309985	0.0199904	1.55067	0.121003	0.338969
GO_EYELID_DEVELOPMENT_IN_CAMERA_TYPE_EYE	Y	0.00735796	13	0.0645739	0.0516757	1.2496	0.211466	0.473323
GO_PIGMENT_BIOSYNTHETIC_PROCESS	Y	0.0173483	35	-0.0826499	0.0494883	-1.67009	0.0949236	0.291345
GO_ERBB_SIGNALING_PATHWAY	Y	0.0310021	69	0.0380259	0.0246978	1.53965	0.123668	0.343042
GO_EMBRYONIC_ORGAN_MORPHOGENESIS	Y	0.0908624	255	0.0217576	0.0136907	1.58922	0.112033	0.32099
GO_REPRODUCTIVE_SYSTEM_DEVELOPMENT	Y	0.117092	352	0.0319783	0.0113462	2.8184	0.00483306	0.038063
GO_CYTOSOLIC_CALCIUM_ION_TRANSPORT	Y	0.0216406	45	0.0120074	0.0333139	0.360432	0.718529	0.870843
GO_REGULATION_OF_SPINDLE_ORGANIZATION	Y	0.00935908	17	0.00503596	0.055361	0.0909658	0.927521	0.965277
GO_POSITIVE_REGULATION_OF_CATABOLIC_PROCESS	Y	0.108743	321	0.0410733	0.0115311	3.56196	0.000369313	0.00528743
GO_PHOSPHOLIPID_SCRAMBLING	Y	0.00588161	10	0.0196942	0.0687261	0.28656	0.774453	0.89694
GO_GLIOGENESIS	Y	0.0598076	153	0.0546039	0.0158458	3.44595	0.000570726	0.00727558
GO_PEPTIDYL_THREONINE_MODIFICATION	Y	0.0211145	45	0.104508	0.0232916	4.48693	7.28315e-06	0.000225923
GO_MITOCHONDRIAL_FISSION	Y	0.00789691	14	0.0219495	0.0576318	0.380858	0.703314	0.864603
GO_MATURATION_OF_5_8S_RRNA_FROM_TRICISTRONIC_RRNA_TRANSCRIPT_SSU_RRNA_5_8S_RRNA_LSU_RRNA_	Y	0.00786639	14	-0.0708874	0.0766747	-0.924521	0.355231	0.617672
GO_NEGATIVE_REGULATION_OF_SPROUTING_ANGIOGENESIS	Y	0.00636038	11	0.0623193	0.0557438	1.11796	0.263604	0.536783
GO_PROSTAGLANDIN_METABOLIC_PROCESS	Y	0.0120743	23	-0.0924572	0.0621285	-1.48816	0.136731	0.363481
GO_POLYOL_TRANSPORT	Y	0.00836213	15	0.0493497	0.0504504	0.978183	0.328001	0.59921
GO_REGULATION_OF_CARDIAC_MUSCLE_CONTRACTION_BY_CALCIUM_ION_SIGNALING	Y	0.00892854	17	0.139236	0.0343208	4.05689	5.00007e-05	0.00113489
GO_ANTIGEN_PROCESSING_AND_PRESENTATION	Y	0.0604314	154	-0.0293473	0.0205056	-1.43118	0.1524	0.386651
GO_CELLULAR_AMINO_ACID_CATABOLIC_PROCESS	Y	0.040549	96	-0.0982846	0.0311936	-3.1508	0.00163167	0.0168715
GO_TELENCEPHALON_GLIAL_CELL_MIGRATION	Y	0.00951581	18	0.122145	0.0372261	3.28117	0.00103631	0.0114809
GO_MAINTENANCE_OF_LOCATION	Y	0.0465541	112	0.0113671	0.021217	0.535753	0.592138	0.799906
GO_NEPHRON_EPITHELIUM_DEVELOPMENT	Y	0.0368481	85	0.0493971	0.0214074	2.30748	0.0210427	0.105508
GO_NEGATIVE_REGULATION_OF_RECEPTOR_ACTIVITY	Y	0.0117026	22	-0.0181111	0.0522958	-0.34632	0.729108	0.874365
GO_KERATINOCYTE_DIFFERENTIATION	Y	0.0275379	60	0.0428656	0.0260082	1.64816	0.0993427	0.298799
GO_REGULATION_OF_NITRIC_OXIDE_SYNTHASE_BIOSYNTHETIC_PROCESS	Y	0.00935383	17	-0.0232558	0.0603788	-0.385166	0.700121	0.862043
GO_POSITIVE_REGULATION_OF_CALCIUM_ION_TRANSMEMBRANE_TRANSPORT	Y	0.0228374	48	0.0285303	0.030538	0.934256	0.350188	0.612172
GO_NEGATIVE_REGULATION_OF_EPITHELIAL_CELL_MIGRATION	Y	0.018916	39	0.0804641	0.0280729	2.86625	0.00415981	0.0341468
GO_POSITIVE_REGULATION_OF_SYNAPSE_MATURATION	Y	0.00461526	8	0.143056	0.0426804	3.35179	0.000805039	0.00959044
GO_PERIPHERAL_NERVOUS_SYSTEM_NEURON_DIFFERENTIATION	Y	0.00678466	12	0.097662	0.0489285	1.99602	0.0459516	0.181351
GO_CELL_REDOX_HOMEOSTASIS	Y	0.0243791	52	-0.059161	0.0383509	-1.54262	0.122945	0.342278
GO_POSITIVE_REGULATION_OF_SMOOTH_MUSCLE_CONTRACTION	Y	0.0147846	29	-0.0718017	0.0526615	-1.36346	0.172761	0.418684
GO_NEGATIVE_REGULATION_OF_GLIAL_CELL_PROLIFERATION	Y	0.00585806	10	0.0555998	0.0609993	0.911483	0.362057	0.625799
GO_POSITIVE_REGULATION_OF_PROTEIN_SECRETION	Y	0.0662161	172	-0.00151551	0.017868	-0.0848169	0.932408	0.966394
GO_POSITIVE_REGULATION_OF_CYTOSKELETON_ORGANIZATION	Y	0.0605064	154	0.00485655	0.0185013	0.262498	0.792941	0.906282
GO_REGULATION_OF_STEROID_HORMONE_SECRETION	Y	0.00927454	17	-0.105699	0.0742469	-1.42362	0.154578	0.389839
GO_RESPONSE_TO_KETONE	Y	0.0595325	151	0.0102238	0.0183678	0.556616	0.577798	0.790269
GO_NEGATIVE_REGULATION_OF_PROTEIN_KINASE_B_SIGNALING	Y	0.0161152	32	0.0465993	0.0351874	1.32432	0.185418	0.437951
GO_LYMPHANGIOGENESIS	Y	0.00579947	10	0.0913153	0.0517664	1.76399	0.0777559	0.255869
GO_REGULATION_OF_POSTSYNAPTIC_MEMBRANE_POTENTIAL	Y	0.0231353	49	0.0569154	0.0274247	2.07533	0.0379738	0.159326
GO_POSITIVE_REGULATION_OF_TOLL_LIKE_RECEPTOR_SIGNALING_PATHWAY	Y	0.00786629	14	-0.0710006	0.0753709	-0.942016	0.346201	0.609486
GO_SENSORY_PERCEPTION_OF_TASTE	Y	0.016877	34	-0.101368	0.0528391	-1.91843	0.0550766	0.20551
GO_FEAR_RESPONSE	Y	0.0135167	27	0.119873	0.0291852	4.10732	4.0255e-05	0.0009705
GO_REGULATION_OF_CLATHRIN_MEDIATED_ENDOCYTOSIS	Y	0.00824349	15	0.097257	0.0430655	2.25835	0.0239392	0.116471
GO_REGULATION_OF_ENDOTHELIAL_CELL_MIGRATION	Y	0.0422104	100	0.0467396	0.0199354	2.34456	0.0190636	0.0989993
GO_LABYRINTHINE_LAYER_BLOOD_VESSEL_DEVELOPMENT	Y	0.00983062	18	-0.0231628	0.0586772	-0.394751	0.693033	0.85877
GO_NEURON_NEURON_SYNAPTIC_TRANSMISSION	Y	0.0207495	43	0.0458585	0.0305091	1.50311	0.132834	0.35791
GO_INNER_MITOCHONDRIAL_MEMBRANE_ORGANIZATION	Y	0.0068829	12	-0.0593078	0.079476	-0.746236	0.455537	0.705621
GO_CILIUM_MORPHOGENESIS	Y	0.0633612	163	-0.0138595	0.0190575	-0.727245	0.467088	0.709678
GO_ENERGY_COUPLED_PROTON_TRANSPORT_DOWN_ELECTROCHEMICAL_GRADIENT	Y	0.00813022	15	-0.241368	0.113994	-2.11738	0.0342451	0.148918
GO_POSITIVE_REGULATION_OF_PHOSPHOPROTEIN_PHOSPHATASE_ACTIVITY	Y	0.00638404	11	0.0400302	0.0612323	0.653744	0.513288	0.743759
GO_CELLULAR_MODIFIED_AMINO_ACID_BIOSYNTHETIC_PROCESS	Y	0.0198424	41	-0.0883848	0.0462812	-1.90973	0.0561881	0.207659
GO_PROTEIN_LOCALIZATION_TO_VACUOLE	Y	0.0199928	41	0.00641217	0.035526	0.180492	0.856769	0.936688
GO_METANEPHRIC_RENAL_VESICLE_MORPHOGENESIS	Y	0.00580502	10	0.0888456	0.0526019	1.68902	0.0912385	0.283968
GO_NEGATIVE_REGULATION_OF_RHO_PROTEIN_SIGNAL_TRANSDUCTION	Y	0.00720488	13	0.115721	0.0412993	2.80201	0.00508554	0.0395702
GO_CELLULAR_RESPONSE_TO_HYDROGEN_PEROXIDE	Y	0.0260535	56	0.01335	0.0297406	0.448881	0.653525	0.837239
GO_REGULATION_OF_ORGAN_GROWTH	Y	0.0301596	67	0.0534683	0.0237175	2.25439	0.0241873	0.116932
GO_REGULATION_OF_SYNAPSE_ASSEMBLY	Y	0.0333025	76	0.0756985	0.0206619	3.66368	0.000249538	0.00404564
GO_NEGATIVE_REGULATION_OF_NEUROTRANSMITTER_SECRETION	Y	0.00547581	10	0.164836	0.034301	4.80558	1.55902e-06	6.20009e-05
GO_POSITIVE_REGULATION_OF_CELL_GROWTH	Y	0.049589	123	0.0791671	0.0160713	4.92599	8.48912e-07	3.68164e-05
GO_NEGATIVE_REGULATION_OF_OXIDOREDUCTASE_ACTIVITY	Y	0.0116358	22	-0.0817242	0.061915	-1.31994	0.186875	0.439824
GO_EMBRYONIC_DIGESTIVE_TRACT_DEVELOPMENT	Y	0.0148219	29	0.0405192	0.0376041	1.07752	0.281267	0.555961
GO_PROTEIN_O_LINKED_MANNOSYLATION	Y	0.00788096	14	-0.0526052	0.0720101	-0.730525	0.465082	0.70959
GO_GUANOSINE_CONTAINING_COMPOUND_BIOSYNTHETIC_PROCESS	Y	0.00629695	11	-0.155076	0.107165	-1.44708	0.147898	0.379995
GO_BONE_MINERALIZATION	Y	0.0174541	35	0.0195433	0.0368484	0.53037	0.595864	0.80171
GO_REGULATION_OF_TRANSMEMBRANE_RECEPTOR_PROTEIN_SERINE_THREONINE_KINASE_SIGNALING_PATHWAY	Y	0.0690565	182	0.0434257	0.0150395	2.88745	0.00388967	0.0329066
GO_CELLULAR_RESPONSE_TO_ORGANIC_SUBSTANCE	Y	0.346335	1543	0.0214001	0.00594528	3.59951	0.000319922	0.00484886
GO_OVULATION_CYCLE_PROCESS	Y	0.0340183	77	0.0321994	0.0238473	1.35023	0.176964	0.424326
GO_POSITIVE_REGULATION_OF_CELL_ADHESION	Y	0.107265	315	0.0346748	0.0118603	2.9236	0.00346559	0.0301409
GO_PROTEIN_LOCALIZATION_TO_CHROMATIN	Y	0.00534044	9	0.0550936	0.0636503	0.865567	0.386742	0.649076
GO_PROTEIN_O_LINKED_FUCOSYLATION	Y	0.00688436	12	-0.0570995	0.079141	-0.72149	0.47062	0.713288
GO_CEREBRAL_CORTEX_DEVELOPMENT	Y	0.0407827	97	0.077497	0.0182284	4.25144	2.13772e-05	0.000568389
GO_ENDOCRINE_PANCREAS_DEVELOPMENT	Y	0.01672	34	0.0948232	0.0288905	3.28216	0.00103268	0.0114809
GO_REGULATION_OF_INTERLEUKIN_8_PRODUCTION	Y	0.0228439	48	-0.0283204	0.0364905	-0.776104	0.437701	0.691717
GO_RNA_PHOSPHODIESTER_BOND_HYDROLYSIS	Y	0.0405578	95	-0.0327521	0.0263674	-1.24215	0.214204	0.47774
GO_ORGANIC_ACID_METABOLIC_PROCESS	Y	0.209897	758	-0.0352501	0.0095505	-3.69092	0.000224295	0.00375412
GO_REGULATION_OF_EXCRETION	Y	0.0116853	22	0.0356404	0.0440236	0.809573	0.418199	0.675653
GO_AROMATIC_AMINO_ACID_FAMILY_METABOLIC_PROCESS	Y	0.012317	24	-0.192802	0.0748664	-2.57528	0.0100261	0.0647037
GO_CYCLIC_NUCLEOTIDE_MEDIATED_SIGNALING	Y	0.0197136	41	0.0837822	0.0270983	3.09179	0.00199344	0.0194454
GO_POSITIVE_REGULATION_OF_PHOSPHOLIPID_METABOLIC_PROCESS	Y	0.0178825	36	0.0174046	0.0365788	0.475812	0.634216	0.825687
GO_REGULATION_OF_ENDOCRINE_PROCESS	Y	0.0191278	39	-0.0368654	0.0415452	-0.887356	0.374902	0.639589
GO_RESPONSE_TO_INSECTICIDE	Y	0.00688735	12	-0.0523578	0.0789433	-0.663233	0.507192	0.739801
GO_REGULATION_OF_NUCLEAR_TRANSCRIBED_MRNA_POLY_A_TAIL_SHORTENING	Y	0.00493934	9	0.173189	0.0419814	4.12538	3.72255e-05	0.000906861
GO_QUATERNARY_AMMONIUM_GROUP_TRANSPORT	Y	0.00833635	15	-0.0888358	0.0781234	-1.13712	0.255507	0.52831
GO_EXIT_FROM_MITOSIS	Y	0.00587866	10	0.0277175	0.0669486	0.414012	0.678872	0.850346
GO_REGULATION_OF_SYMBIOSIS_ENCOMPASSING_MUTUALISM_THROUGH_PARASITISM	Y	0.0617738	158	-0.0127113	0.0192839	-0.659167	0.509799	0.741707
GO_RESPONSE_TO_GROWTH_HORMONE	Y	0.013073	25	-0.011706	0.0481204	-0.243264	0.807804	0.91328
GO_PROTEIN_DEMANNOSYLATION	Y	0.00664881	12	0.13059	0.0390609	3.34325	0.000830197	0.00975481
GO_G1_DNA_DAMAGE_CHECKPOINT	Y	0.0286172	63	0.0563695	0.0242411	2.32537	0.0200666	0.10171
GO_POSITIVE_REGULATION_OF_PRI_MIRNA_TRANSCRIPTION_FROM_RNA_POLYMERASE_II_PROMOTER	Y	0.00531946	9	0.0727804	0.0599656	1.2137	0.224882	0.489418
GO_RESPONSE_TO_OXYGEN_LEVELS	Y	0.0966112	276	0.0349171	0.0126467	2.76096	0.00577066	0.0428982
GO_POSITIVE_REGULATION_OF_IMMUNE_SYSTEM_PROCESS	Y	0.194135	680	0.00929921	0.00887399	1.04792	0.294695	0.568969
GO_PHOTOTRANSDUCTION_VISIBLE_LIGHT	Y	0.00788058	14	0.0434382	0.0537696	0.807858	0.419186	0.676749
GO_CELL_COMMUNICATION_INVOLVED_IN_CARDIAC_CONDUCTION	Y	0.0169883	34	0.0416399	0.0346721	1.20096	0.229786	0.495915
GO_PROTEIN_LOCALIZATION_TO_CHROMOSOME_TELOMERIC_REGION	Y	0.00588423	10	0.00520503	0.0721278	0.072164	0.942472	0.969605
GO_POSITIVE_REGULATION_OF_CALCIUM_ION_TRANSMEMBRANE_TRANSPORTER_ACTIVITY	Y	0.0125481	24	0.0596055	0.0387688	1.53746	0.124203	0.343792
GO_REGULATION_OF_RECEPTOR_MEDIATED_ENDOCYTOSIS	Y	0.0305288	68	0.0547377	0.0234953	2.32973	0.0198347	0.101336
GO_POSITIVE_REGULATION_OF_LYMPHOCYTE_MEDIATED_IMMUNITY	Y	0.0264277	57	-0.0277832	0.03343	-0.831085	0.40594	0.664382
GO_POSITIVE_REGULATION_OF_BIOMINERAL_TISSUE_DEVELOPMENT	Y	0.0166003	33	0.0136124	0.0386787	0.351934	0.724893	0.873539
GO_VIRAL_ENTRY_INTO_HOST_CELL	Y	0.0329264	74	0.0254108	0.0248644	1.02198	0.306809	0.577969
GO_RESPONSE_TO_TRANSFORMING_GROWTH_FACTOR_BETA	Y	0.0530415	132	0.0510756	0.0171502	2.97813	0.00290507	0.0263495
GO_N_ACETYLGLUCOSAMINE_METABOLIC_PROCESS	Y	0.00790112	14	-0.00892836	0.0637214	-0.140116	0.888571	0.952674
GO_TRANSCRIPTION_ELONGATION_FROM_RNA_POLYMERASE_II_PROMOTER	Y	0.0291701	64	-0.00710341	0.0296915	-0.23924	0.810923	0.915609
GO_OXIDATIVE_PHOSPHORYLATION	Y	0.0221083	47	-0.13626	0.0534473	-2.54944	0.0108003	0.0678773
GO_APOPTOTIC_NUCLEAR_CHANGES	Y	0.0111637	21	0.0656702	0.0408242	1.60861	0.107725	0.314906
GO_REGULATION_OF_RAC_PROTEIN_SIGNAL_TRANSDUCTION	Y	0.0067339	12	0.112111	0.0436584	2.56791	0.0102417	0.0655496
GO_CELLULAR_AMIDE_METABOLIC_PROCESS	Y	0.157481	517	-0.0412423	0.011693	-3.52708	0.000421511	0.00592534
GO_NEGATIVE_REGULATION_OF_EXTRINSIC_APOPTOTIC_SIGNALING_PATHWAY_IN_ABSENCE_OF_LIGAND	Y	0.0139307	27	0.0439705	0.0384397	1.14388	0.252692	0.525049
GO_PARENTAL_BEHAVIOR	Y	0.00465954	8	0.131774	0.0493517	2.67009	0.00759176	0.052488
GO_REGULATION_OF_DNA_BINDING	Y	0.0322454	73	0.0716482	0.0215476	3.3251	0.000886122	0.0102311
GO_IMMUNOGLOBULIN_PRODUCTION	Y	0.0159585	32	-0.126379	0.0571842	-2.21004	0.0271183	0.126055
GO_REGULATION_OF_TRANSFORMING_GROWTH_FACTOR_BETA_PRODUCTION	Y	0.0123665	24	0.10014	0.033466	2.99231	0.00277359	0.0252554
GO_TISSUE_MIGRATION	Y	0.032183	72	0.0234535	0.0253917	0.92367	0.355674	0.617884
GO_ONE_CARBON_COMPOUND_TRANSPORT	Y	0.00637013	11	-0.0709206	0.084758	-0.836743	0.402752	0.660558
GO_LEFT_RIGHT_AXIS_SPECIFICATION	Y	0.00588388	10	-0.00918294	0.0754492	-0.12171	0.90313	0.956438
GO_RESPONSE_TO_ISCHEMIA	Y	0.0130409	25	0.0414531	0.0403123	1.0283	0.303826	0.57609
GO_ENSHEATHMENT_OF_NEURONS	Y	0.0352144	81	0.0685122	0.0205145	3.3397	0.000840877	0.00980602
GO_ENTRY_INTO_OTHER_ORGANISM_INVOLVED_IN_SYMBIOTIC_INTERACTION	Y	0.0329264	74	0.0254108	0.0248644	1.02198	0.306809	0.577969
GO_POSITIVE_REGULATION_OF_MAST_CELL_ACTIVATION_INVOLVED_IN_IMMUNE_RESPONSE	Y	0.0063914	11	-0.0321045	0.0769097	-0.417431	0.67637	0.849204
GO_POSITIVE_REGULATION_OF_PHOSPHORUS_METABOLIC_PROCESS	Y	0.229019	854	0.0306442	0.0075245	4.07259	4.6748e-05	0.00107682
GO_CHROMATIN_DISASSEMBLY	Y	0.00839193	15	0.00636985	0.0586796	0.108553	0.913559	0.958896
GO_PLATELET_MORPHOGENESIS	Y	0.00935711	17	0.0137637	0.0538116	0.255775	0.798129	0.90866
GO_DENDRITE_MORPHOGENESIS	Y	0.0198577	42	0.108994	0.0246525	4.4212	9.88926e-06	0.000294966
GO_RESPONSE_TO_AMPHETAMINE	Y	0.0112443	21	0.00495797	0.0498324	0.0994929	0.920748	0.962056
GO_RESPONSE_TO_CAMP	Y	0.0388269	90	0.00309635	0.0242771	0.127542	0.898513	0.955595
GO_MYOBLAST_DIFFERENTIATION	Y	0.0173093	35	0.069665	0.0311098	2.23933	0.0251502	0.119779
GO_POSITIVE_REGULATION_OF_ACTIN_NUCLEATION	Y	0.00879666	16	0.0739147	0.0448616	1.64762	0.0994538	0.298939
GO_REGULATION_OF_MEGAKARYOCYTE_DIFFERENTIATION	Y	0.00926392	17	-0.113592	0.0764776	-1.4853	0.137487	0.364308
GO_NEGATIVE_REGULATION_OF_HEMOPOIESIS	Y	0.0427202	101	-0.0173635	0.0244091	-0.711351	0.476878	0.717479
GO_REGULATION_OF_MUSCLE_CELL_DIFFERENTIATION	Y	0.0523499	130	0.0534745	0.0171252	3.12257	0.00179646	0.0180539
GO_INNATE_IMMUNE_RESPONSE_IN_MUCOSA	Y	0.00317539	5	-0.0758448	0.127672	-0.594062	0.55248	0.774771
GO_REGULATION_OF_CHEMOKINE_SECRETION	Y	0.00638701	11	-0.0422247	0.0791333	-0.53359	0.593634	0.800003
GO_RESPONSE_TO_STEROL	Y	0.0102175	19	0.0724174	0.0420237	1.72325	0.0848653	0.270835
GO_REGULATION_OF_ENDOPLASMIC_RETICULUM_STRESS_INDUCED_INTRINSIC_APOPTOTIC_SIGNALING_PATHWAY	Y	0.0130355	25	0.0443222	0.0400736	1.10602	0.268737	0.541604
GO_RIBOSOMAL_SMALL_SUBUNIT_BIOGENESIS	Y	0.0160459	32	-0.0916761	0.0527048	-1.73943	0.0819819	0.264353
GO_TRABECULA_MORPHOGENESIS	Y	0.0183033	37	0.0206574	0.0356935	0.578745	0.562771	0.782056
GO_PHOTORECEPTOR_CELL_MAINTENANCE	Y	0.013972	27	-0.00613347	0.045519	-0.134745	0.892815	0.95349
GO_REGULATION_OF_CALCIUM_ION_IMPORT	Y	0.0344217	79	0.0738946	0.020475	3.60901	0.000308442	0.00471251
GO_HEPARAN_SULFATE_PROTEOGLYCAN_METABOLIC_PROCESS	Y	0.0134717	26	0.0498944	0.0384994	1.29598	0.195005	0.451792
GO_INTESTINAL_EPITHELIAL_CELL_DEVELOPMENT	Y	0.00472761	8	0.10944	0.053882	2.03111	0.0422629	0.172047
GO_CELLULAR_RESPONSE_TO_GLUCAGON_STIMULUS	Y	0.0161686	32	-0.0125234	0.0426495	-0.293636	0.76904	0.895999
GO_REGULATION_OF_METAL_ION_TRANSPORT	Y	0.0938341	266	0.0338258	0.0129205	2.618	0.0088542	0.0588551
GO_POSITIVE_REGULATION_OF_T_HELPER_1_TYPE_IMMUNE_RESPONSE	Y	0.00781025	14	-0.124857	0.0868736	-1.43722	0.150677	0.383744
GO_MODIFICATION_BY_SYMBIONT_OF_HOST_MORPHOLOGY_OR_PHYSIOLOGY	Y	0.0190581	39	0.0550137	0.0309918	1.7751	0.0759025	0.251012
GO_SISTER_CHROMATID_SEGREGATION	Y	0.0611246	156	0.0153174	0.0177913	0.860946	0.389283	0.65109
GO_REGULATION_OF_CELL_MIGRATION_INVOLVED_IN_SPROUTING_ANGIOGENESIS	Y	0.0102928	19	0.0338364	0.0474692	0.712808	0.475977	0.717055
GO_PHASIC_SMOOTH_MUSCLE_CONTRACTION	Y	0.00784894	14	-0.0894676	0.0794833	-1.12562	0.260348	0.53507
GO_AXON_ENSHEATHMENT_IN_CENTRAL_NERVOUS_SYSTEM	Y	0.00683021	12	0.0804729	0.0508337	1.58306	0.11343	0.323225
GO_MONOSACCHARIDE_BIOSYNTHETIC_PROCESS	Y	0.0221135	47	-0.134965	0.0475686	-2.83728	0.00455652	0.0365543
GO_ORGANELLE_MEMBRANE_FUSION	Y	0.0355553	81	0.00265813	0.0256166	0.103766	0.917357	0.959852
GO_REGULATION_OF_ERK1_AND_ERK2_CASCADE	Y	0.0730029	194	0.00649942	0.0164257	0.395685	0.692343	0.858674
GO_REGULATION_OF_T_CELL_MEDIATED_CYTOTOXICITY	Y	0.00838259	15	-0.0335066	0.0660984	-0.50692	0.612219	0.813502
GO_CARBOHYDRATE_DERIVATIVE_BIOSYNTHETIC_PROCESS	Y	0.153962	500	-0.00834639	0.0108179	-0.771537	0.440402	0.6937
GO_NEGATIVE_REGULATION_OF_ACTIN_FILAMENT_BUNDLE_ASSEMBLY	Y	0.00966202	18	0.0963674	0.0373058	2.58317	0.00979963	0.0638623
GO_POSITIVE_REGULATION_OF_CELL_JUNCTION_ASSEMBLY	Y	0.0111302	21	0.0761035	0.0391439	1.9442	0.0518913	0.196615
GO_NONRIBOSOMAL_PEPTIDE_BIOSYNTHETIC_PROCESS	Y	0.00681289	12	-0.138193	0.0942667	-1.46598	0.142676	0.372399
GO_HEART_MORPHOGENESIS	Y	0.0723453	193	0.04804	0.0143989	3.33637	0.000851023	0.00989952
GO_RAS_PROTEIN_SIGNAL_TRANSDUCTION	Y	0.052139	129	0.0427071	0.0178562	2.39172	0.0167829	0.0912278
GO_NEGATIVE_REGULATION_OF_DENDRITE_DEVELOPMENT	Y	0.0138587	27	0.068327	0.0352227	1.93986	0.052417	0.197885
GO_REGULATION_OF_HORMONE_SECRETION	Y	0.0823538	226	0.0354788	0.0139132	2.55	0.0107827	0.0678773
GO_REGULATION_OF_CALCIUM_ION_TRANSPORT	Y	0.0643778	167	0.0448605	0.0156454	2.86733	0.00414573	0.0341418
GO_SENSORY_PERCEPTION_OF_LIGHT_STIMULUS	Y	0.0665278	173	-0.00369579	0.0179367	-0.206046	0.836758	0.928003
GO_TERPENOID_METABOLIC_PROCESS	Y	0.0324731	73	-0.0541116	0.0320072	-1.69061	0.0909335	0.283643
GO_LEUKOCYTE_TETHERING_OR_ROLLING	Y	0.00675232	12	0.107267	0.0456251	2.35106	0.0187339	0.0988717
GO_CELL_PROLIFERATION	Y	0.17159	578	0.0277831	0.00907976	3.0599	0.00221832	0.0209856
GO_REGULATION_OF_LIPID_KINASE_ACTIVITY	Y	0.021578	45	0.0431561	0.0299409	1.44138	0.149501	0.382213
GO_POSITIVE_REGULATION_OF_OSTEOCLAST_DIFFERENTIATION	Y	0.0121298	23	0.0442339	0.0418799	1.05621	0.290891	0.563026
GO_CEREBELLAR_PURKINJE_CELL_DIFFERENTIATION	Y	0.00610446	11	0.141677	0.040824	3.47044	0.000521176	0.00692367
GO_LYSOSOME_LOCALIZATION	Y	0.0110797	21	-0.140175	0.0723936	-1.93628	0.052853	0.198807
GO_VITAMIN_D_METABOLIC_PROCESS	Y	0.00466258	8	-0.282043	0.139891	-2.01617	0.0438015	0.176152
[truncated: 2,654 more rows]

## Sheet: mirna_mrna_gomf_iwls_GS
GS	converged	loss	gene.tested	coef	std.err	t.value	p.value	adj.p.val
GO_CYCLIC_NUCLEOTIDE_PHOSPHODIESTERASE_ACTIVITY	Y	0.0116776	22	0.041038	0.0431418	0.951236	0.341501	0.591893
GO_PROTEIN_SERINE_THREONINE_TYROSINE_KINASE_ACTIVITY	Y	0.0178046	36	0.0532202	0.0322022	1.65269	0.0984161	0.285714
GO_HYDROLASE_ACTIVITY_ACTING_ON_CARBON_NITROGEN_BUT_NOT_PEPTIDE_BONDS_IN_CYCLIC_AMIDINES	Y	0.0126219	24	-0.00405892	0.0479666	-0.0846196	0.932565	0.97343
GO_5_3_EXONUCLEASE_ACTIVITY	Y	0.00535205	9	-0.0485935	0.0895861	-0.542422	0.587536	0.787649
GO_POLYUBIQUITIN_BINDING	Y	0.0174489	35	-0.0267672	0.0425667	-0.62883	0.529471	0.743942
GO_COFACTOR_TRANSPORTER_ACTIVITY	Y	0.0107755	20	-0.0165492	0.0545851	-0.303182	0.761756	0.893524
GO_BETA_CATENIN_BINDING	Y	0.0349144	80	0.0625775	0.0210749	2.96928	0.00299	0.0315649
GO_UDP_GALACTOSYLTRANSFERASE_ACTIVITY	Y	0.0135235	26	0.00988886	0.0440863	0.224307	0.822522	0.926209
GO_MITOGEN_ACTIVATED_PROTEIN_KINASE_BINDING	Y	0.0111593	21	0.0671907	0.040241	1.6697	0.0950002	0.280513
GO_PHOSPHATE_TRANSMEMBRANE_TRANSPORTER_ACTIVITY	Y	0.0139718	27	-0.00720872	0.0456676	-0.157852	0.874576	0.942553
GO_PEPTIDASE_ACTIVITY	Y	0.147215	472	-0.0208358	0.0115308	-1.80697	0.0707877	0.242229
GO_IMMUNOGLOBULIN_BINDING	Y	0.00823876	15	-0.166575	0.0892987	-1.86537	0.0621501	0.224659
GO_PROTEIN_KINASE_A_REGULATORY_SUBUNIT_BINDING	Y	0.00874875	16	0.0895514	0.0424613	2.10901	0.0349614	0.166559
GO_SIGNAL_TRANSDUCER_ACTIVITY	Y	0.266603	1053	0.0158172	0.00712137	2.22109	0.0263609	0.141168
GO_MHC_PROTEIN_COMPLEX_BINDING	Y	0.0083554	15	-0.0697848	0.072734	-0.959451	0.337348	0.586884
GO_IONOTROPIC_GLUTAMATE_RECEPTOR_BINDING	Y	0.011582	22	0.077458	0.0372355	2.08022	0.0375234	0.176057
GO_UBIQUITIN_LIKE_PROTEIN_TRANSFERASE_ACTIVITY	Y	0.121219	373	0.0700045	0.00978653	7.15314	8.90208e-13	1.37834e-10
GO_TRANSMEMBRANE_RECEPTOR_PROTEIN_KINASE_ACTIVITY	Y	0.0329264	75	0.0764123	0.0207944	3.67466	0.000239059	0.00396581
GO_SMAD_BINDING	Y	0.0300603	68	0.0957469	0.020121	4.75855	1.96939e-06	6.09853e-05
GO_SYNTAXIN_1_BINDING	Y	0.00980907	18	0.0434892	0.0471338	0.922676	0.356192	0.602841
GO_LONG_CHAIN_FATTY_ACID_BINDING	Y	0.00483046	8	-0.0310786	0.0899011	-0.345698	0.729575	0.872395
GO_ACETYLGALACTOSAMINYLTRANSFERASE_ACTIVITY	Y	0.0144086	28	-0.022832	0.0470124	-0.485659	0.627216	0.811807
GO_OXIDOREDUCTASE_ACTIVITY_ACTING_ON_THE_ALDEHYDE_OR_OXO_GROUP_OF_DONORS_NAD_OR_NADP_AS_ACCEPTOR	Y	0.014788	29	-0.0699175	0.052658	-1.32777	0.184277	0.42541
GO_ACTIVE_ION_TRANSMEMBRANE_TRANSPORTER_ACTIVITY	Y	0.0584974	148	-0.0296795	0.0209432	-1.41715	0.156462	0.38052
GO_CYTOKINE_BINDING	Y	0.0337073	76	0.00167878	0.0265225	0.0632964	0.949531	0.980127
GO_NEUROTRANSMITTER_BINDING	Y	0.0116798	22	-0.0474753	0.0569686	-0.833359	0.404657	0.645921
GO_OLFACTORY_RECEPTOR_ACTIVITY	Y	0.01564	34	-0.478892	0.0921516	-5.19678	2.05613e-07	9.55072e-06
GO_SERINE_TYPE_EXOPEPTIDASE_ACTIVITY	Y	0.00785094	14	-0.0874575	0.0783784	-1.11584	0.264511	0.520617
GO_3_5_CYCLIC_AMP_PHOSPHODIESTERASE_ACTIVITY	Y	0.00782932	14	0.0744483	0.0476795	1.56143	0.118444	0.323632
GO_VOLTAGE_GATED_ION_CHANNEL_ACTIVITY	Y	0.0613907	157	0.0262748	0.0171101	1.53563	0.124652	0.335481
GO_PHOSPHATIDYLINOSITOL_3_5_BISPHOSPHATE_BINDING	Y	0.0102812	19	0.0431172	0.0460022	0.937287	0.348627	0.596605
GO_PROTEIN_KINASE_C_BINDING	Y	0.0203901	42	0.0248657	0.0330182	0.753091	0.451408	0.686347
GO_BETA_2_MICROGLOBULIN_BINDING	Y	0.00247409	4	-0.419935	0.235518	-1.78302	0.0746039	0.247837
GO_PROTEIN_COMPLEX_SCAFFOLD	Y	0.0284014	62	-0.000133832	0.0295174	-0.00453401	0.996382	0.998615
GO_HEAT_SHOCK_PROTEIN_BINDING	Y	0.0340788	77	0.00177998	0.0263425	0.0675706	0.946128	0.977701
GO_PHOSPHOPROTEIN_BINDING	Y	0.0258435	56	0.0659784	0.0249355	2.64596	0.008155	0.0648158
GO_OXALATE_TRANSMEMBRANE_TRANSPORTER_ACTIVITY	Y	0.00404727	7	-0.423972	0.175822	-2.41137	0.0159053	0.101904
GO_GTPASE_ACTIVITY	Y	0.0757172	203	0.0108728	0.0158433	0.686272	0.492553	0.716662
GO_AMINO_ACID_BINDING	Y	0.0387165	90	-0.047463	0.0282135	-1.68228	0.0925375	0.277259
GO_OXIDOREDUCTASE_ACTIVITY_ACTING_ON_THE_CH_CH_GROUP_OF_DONORS	Y	0.0223708	47	-0.0606263	0.0402676	-1.50559	0.132196	0.348893
GO_OXIDOREDUCTASE_ACTIVITY_ACTING_ON_A_HEME_GROUP_OF_DONORS	Y	0.00912783	17	-0.202181	0.0911287	-2.21863	0.0265281	0.141168
GO_QUINONE_BINDING	Y	0.0057872	10	-0.160942	0.108239	-1.48691	0.137061	0.35567
GO_G_PROTEIN_ALPHA_SUBUNIT_BINDING	Y	0.0111527	21	-0.0977012	0.0658652	-1.48335	0.138004	0.357118
GO_MITOGEN_ACTIVATED_PROTEIN_KINASE_KINASE_BINDING	Y	0.00880482	16	0.07068	0.0449944	1.57086	0.116237	0.319868
GO_PEPTIDASE_REGULATOR_ACTIVITY	Y	0.058815	149	-0.0308127	0.02095	-1.47077	0.141375	0.362473
GO_CYTOSKELETAL_PROTEIN_BINDING	Y	0.19816	701	0.0301013	0.00824835	3.64938	0.000263832	0.00422587
GO_VITAMIN_TRANSPORTER_ACTIVITY	Y	0.0112293	21	-0.0357265	0.0564571	-0.632807	0.52687	0.741999
GO_TRANSFERASE_ACTIVITY_TRANSFERRING_SULFUR_CONTAINING_GROUPS	Y	0.0244534	52	-0.0261807	0.0348854	-0.750477	0.45298	0.68649
GO_CYCLASE_ACTIVITY	Y	0.0107637	20	-0.0364085	0.0581046	-0.626603	0.53093	0.743942
GO_PROTEIN_SELF_ASSOCIATION	Y	0.0170309	34	0.0134991	0.038146	0.353881	0.723434	0.870412
GO_CYSTEINE_TYPE_PEPTIDASE_ACTIVITY	Y	0.0546084	136	0.0204538	0.0187148	1.09292	0.274447	0.528965
GO_LIPID_TRANSPORTER_ACTIVITY	Y	0.0351738	80	-0.0168482	0.0273638	-0.615711	0.538095	0.748339
GO_ENDODEOXYRIBONUCLEASE_ACTIVITY_PRODUCING_5_PHOSPHOMONOESTERS	Y	0.0042973	7	-0.00300168	0.0884697	-0.0339289	0.972934	0.988155
GO_SULFUR_COMPOUND_TRANSMEMBRANE_TRANSPORTER_ACTIVITY	Y	0.0102505	19	-0.0797725	0.066869	-1.19297	0.232902	0.47553
GO_DNA_POLYMERASE_ACTIVITY	Y	0.0130751	25	0.00193833	0.0461206	0.0420273	0.966478	0.986657
GO_HISTONE_BINDING	Y	0.054259	136	0.0581562	0.0164935	3.526	0.000423237	0.00644569
GO_UBIQUITIN_LIKE_PROTEIN_BINDING	Y	0.0434239	103	0.0151749	0.0218439	0.694698	0.487256	0.715382
GO_DNA_BINDING_BENDING	Y	0.0083908	15	-0.0128151	0.062349	-0.205538	0.837155	0.92725
GO_RNA_METHYLTRANSFERASE_ACTIVITY	Y	0.0185621	38	-0.100841	0.049675	-2.03001	0.0423747	0.185689
GO_CYCLIC_NUCLEOTIDE_GATED_ION_CHANNEL_ACTIVITY	Y	0.00479662	8	-0.103156	0.107092	-0.963247	0.33544	0.586862
GO_NARROW_PORE_CHANNEL_ACTIVITY	Y	0.00683639	12	-0.114928	0.0894282	-1.28514	0.198763	0.438046
GO_STEROID_DEHYDROGENASE_ACTIVITY	Y	0.00886986	16	-0.0295804	0.0633405	-0.467005	0.640503	0.819597
GO_BHLH_TRANSCRIPTION_FACTOR_BINDING	Y	0.0138052	27	0.0803789	0.0342663	2.34571	0.0190045	0.112454
GO_G_PROTEIN_COUPLED_NEUROTRANSMITTER_RECEPTOR_ACTIVITY	Y	0.00478949	8	-0.11445	0.111658	-1.025	0.30538	0.556271
GO_METHYLATED_HISTONE_BINDING	Y	0.0201108	42	0.0851444	0.0264442	3.21978	0.00128582	0.0153144
GO_ATP_DEPENDENT_DNA_HELICASE_ACTIVITY	Y	0.0121556	23	-0.0278569	0.052653	-0.529067	0.596767	0.793726
GO_PURINE_NTP_DEPENDENT_HELICASE_ACTIVITY	Y	0.0321536	72	-0.0377858	0.0306608	-1.23238	0.217826	0.455768
GO_PROTEIN_BINDING_INVOLVED_IN_CELL_ADHESION	Y	0.00838196	15	0.0302483	0.0541825	0.558267	0.576671	0.780197
GO_FIBROBLAST_GROWTH_FACTOR_RECEPTOR_BINDING	Y	0.013055	25	-0.0375654	0.0520743	-0.72138	0.470687	0.704097
GO_VOLTAGE_GATED_ANION_CHANNEL_ACTIVITY	Y	0.0078125	14	-0.122931	0.0848501	-1.4488	0.147416	0.367157
GO_RNA_POLYMERASE_II_TRANSCRIPTION_COREPRESSOR_ACTIVITY	Y	0.0129544	25	0.0723273	0.0365444	1.97916	0.0478171	0.2001
GO_HYDROGEN_ION_TRANSMEMBRANE_TRANSPORTER_ACTIVITY	Y	0.0322376	74	-0.161873	0.0411637	-3.93242	8.45005e-05	0.00170654
GO_PHOSPHATASE_INHIBITOR_ACTIVITY	Y	0.0157055	31	0.0360223	0.0370537	0.972165	0.330985	0.582358
GO_MAGNESIUM_ION_BINDING	Y	0.0636881	164	0.00910488	0.0176971	0.514483	0.606922	0.800896
GO_DNA_SECONDARY_STRUCTURE_BINDING	Y	0.00935729	17	0.0132213	0.0539444	0.245092	0.806389	0.919185
GO_SULFUR_COMPOUND_BINDING	Y	0.0747947	200	-0.0166012	0.0173615	-0.956209	0.338983	0.588627
GO_SIGNAL_SEQUENCE_BINDING	Y	0.0170191	34	0.025352	0.036673	0.691297	0.48939	0.715382
GO_OXIDOREDUCTASE_ACTIVITY_ACTING_ON_THE_CH_OH_GROUP_OF_DONORS_NAD_OR_NADP_AS_ACCEPTOR	Y	0.0368352	85	-0.0647549	0.0302557	-2.14025	0.0323514	0.158182
GO_SYNTAXIN_BINDING	Y	0.035186	80	-0.00603338	0.0264825	-0.227825	0.819785	0.925371
GO_HEPARAN_SULFATE_SULFOTRANSFERASE_ACTIVITY	Y	0.00680076	12	0.0921946	0.0484322	1.90358	0.0569852	0.218757
GO_PHOSPHATIDYLINOSITOL_PHOSPHATE_PHOSPHATASE_ACTIVITY	Y	0.0129559	25	0.0719476	0.0359556	2.00101	0.0454102	0.194048
GO_CARBOHYDRATE_BINDING	Y	0.0755445	203	-0.0408798	0.018475	-2.21271	0.0269336	0.142166
GO_TAU_PROTEIN_BINDING	Y	0.00587278	10	0.0384598	0.0643008	0.598123	0.549767	0.756592
GO_ACYLGLYCEROL_O_ACYLTRANSFERASE_ACTIVITY	Y	0.0112311	21	-0.0334322	0.0559218	-0.597838	0.549957	0.756592
GO_COMPLEMENT_BINDING	Y	0.00827352	15	-0.14093	0.0844332	-1.66913	0.0951146	0.280513
GO_HORMONE_RECEPTOR_BINDING	Y	0.0547604	137	0.0447165	0.0172098	2.59832	0.00937805	0.0714116
GO_DIVALENT_INORGANIC_CATION_TRANSMEMBRANE_TRANSPORTER_ACTIVITY	Y	0.0548884	137	0.029767	0.0180867	1.64579	0.0998286	0.288015
GO_PROTEIN_HETERODIMERIZATION_ACTIVITY	Y	0.117478	353	0.0236204	0.0116296	2.03105	0.0422683	0.185689
GO_PROTEIN_PHOSPHATASE_BINDING	Y	0.0456853	110	0.0462149	0.0190833	2.42175	0.0154587	0.100312
GO_MONOVALENT_INORGANIC_CATION_TRANSMEMBRANE_TRANSPORTER_ACTIVITY	Y	0.10321	299	0.00176803	0.0134787	0.131172	0.895641	0.951473
GO_3_5_CYCLIC_GMP_PHOSPHODIESTERASE_ACTIVITY	Y	0.00688813	12	-0.0510714	0.0780422	-0.654408	0.51286	0.732995
GO_VOLTAGE_GATED_CATION_CHANNEL_ACTIVITY	Y	0.0468305	113	0.0302195	0.0198565	1.52189	0.128059	0.341857
GO_PROTEIN_TYROSINE_KINASE_ACTIVITY	Y	0.0623251	160	0.029329	0.0168067	1.74508	0.0809933	0.257681
GO_TRANSMITTER_GATED_CHANNEL_ACTIVITY	Y	0.0107787	20	-0.00422006	0.0525636	-0.0802849	0.936012	0.974837
GO_PROTEIN_DEACETYLASE_ACTIVITY	Y	0.0198351	41	0.0659033	0.0290006	2.27248	0.0230727	0.129124
GO_ENDONUCLEASE_ACTIVITY_ACTIVE_WITH_EITHER_RIBO_OR_DEOXYRIBONUCLEIC_ACIDS_AND_PRODUCING_3_PHOSPHOMONOESTERS	Y	0.00732152	13	-0.124532	0.0895382	-1.39083	0.1643	0.395428
GO_SODIUM_AMINO_ACID_SYMPORTER_ACTIVITY	Y	0.00681659	12	0.08622	0.0479497	1.79813	0.0721772	0.242229
GO_FATTY_ACYL_COA_BINDING	Y	0.0117005	22	-0.0221435	0.0529102	-0.418511	0.67558	0.84584
GO_PHOSPHATIDYLINOSITOL_3_5_BISPHOSPHATE_3_PHOSPHATASE_ACTIVITY	Y	0.00577577	10	0.10077	0.0494262	2.03879	0.0414896	0.185378
GO_TRANSCRIPTIONAL_ACTIVATOR_ACTIVITY_RNA_POLYMERASE_II_DISTAL_ENHANCER_SEQUENCE_SPECIFIC_BINDING	Y	0.0129696	25	0.0683082	0.0365735	1.8677	0.0618252	0.224659
GO_CYCLIN_BINDING	Y	0.00935773	17	-0.012405	0.0584644	-0.212179	0.83197	0.92725
GO_G_PROTEIN_COUPLED_NUCLEOTIDE_RECEPTOR_ACTIVITY	Y	0.00585498	10	-0.0773136	0.0909171	-0.850375	0.395131	0.633755
GO_RNA_POLYMERASE_III_ACTIVITY	Y	0.00928038	17	-0.101232	0.0746564	-1.35597	0.175131	0.411603
GO_ACID_AMINO_ACID_LIGASE_ACTIVITY	Y	0.00929411	17	-0.0903295	0.0725387	-1.24526	0.213057	0.451062
GO_OXIDOREDUCTASE_ACTIVITY_ACTING_ON_NAD_P_H	Y	0.0214894	45	-0.0850388	0.0438928	-1.93742	0.0527138	0.213848
GO_CORE_PROMOTER_BINDING	Y	0.0540585	137	0.0838599	0.0150784	5.56159	2.72228e-08	1.58062e-06
GO_NEUROPEPTIDE_RECEPTOR_BINDING	Y	0.011984	23	-0.140904	0.0703672	-2.00241	0.0452599	0.194048
GO_RETINOIC_ACID_BINDING	Y	0.00584385	10	0.0670782	0.0583053	1.15047	0.249972	0.499218
GO_DIACYLGLYCEROL_KINASE_ACTIVITY	Y	0.00639007	11	0.0308154	0.0630829	0.488491	0.62521	0.811807
GO_STEROID_BINDING	Y	0.0286962	63	0.0426119	0.025469	1.67309	0.094332	0.279982
GO_LEUCINE_ZIPPER_DOMAIN_BINDING	Y	0.00536277	9	0.0119805	0.0744559	0.160907	0.872169	0.942468
GO_PHOSPHATIDYLINOSITOL_5_PHOSPHATE_BINDING	Y	0.00639481	11	-0.0218752	0.0748478	-0.292262	0.770091	0.899892
GO_I_SMAD_BINDING	Y	0.006369	11	0.0556111	0.0579365	0.959863	0.337141	0.586884
GO_ENHANCER_BINDING	Y	0.0373071	86	0.0337033	0.0224742	1.49964	0.13373	0.350766
GO_DEMETHYLASE_ACTIVITY	Y	0.0165654	33	0.0388601	0.0356194	1.09098	0.2753	0.529511
GO_RAC_GUANYL_NUCLEOTIDE_EXCHANGE_FACTOR_ACTIVITY	Y	0.0074013	13	0.0227023	0.0597506	0.379951	0.703987	0.865085
GO_PROTEIN_BINDING_INVOLVED_IN_PROTEIN_FOLDING	Y	0.00634417	11	-0.104435	0.0940595	-1.1103	0.266888	0.523077
GO_KINASE_INHIBITOR_ACTIVITY	Y	0.0355135	81	0.0265188	0.0237	1.11893	0.263187	0.51911
GO_PHOTORECEPTOR_ACTIVITY	Y	0.00587733	10	-0.035079	0.0812773	-0.431597	0.666041	0.840696
GO_CYTOSKELETAL_ADAPTOR_ACTIVITY	Y	0.00767536	14	0.117682	0.0404261	2.91105	0.00360788	0.0356566
GO_TRANSCRIPTION_FACTOR_ACTIVITY_DIRECT_LIGAND_REGULATED_SEQUENCE_SPECIFIC_DNA_BINDING	Y	0.0221693	47	0.0805284	0.0258378	3.11669	0.00183265	0.0209944
GO_RACEMASE_AND_EPIMERASE_ACTIVITY	Y	0.00639737	11	0.00911635	0.0679108	0.13424	0.893215	0.951209
GO_PROTEIN_LIPID_COMPLEX_BINDING	Y	0.00983374	18	0.0146128	0.0521524	0.280195	0.779332	0.9045
GO_CARBOXY_LYASE_ACTIVITY	Y	0.0152595	30	-0.0494124	0.0491415	-1.00551	0.314667	0.565427
GO_MIRNA_BINDING	Y	0.00806699	15	0.131424	0.037868	3.47057	0.000520928	0.00780552
GO_ESTROGEN_RECEPTOR_BINDING	Y	0.0191361	39	0.0274662	0.0339448	0.809142	0.418447	0.656633
GO_TRANSCRIPTIONAL_REPRESSOR_ACTIVITY_RNA_POLYMERASE_II_TRANSCRIPTION_REGULATORY_REGION_SEQUENCE_SPECIFIC_BINDING	Y	0.0585244	149	0.0547749	0.0160325	3.41648	0.000636154	0.0088207
GO_GUANYLATE_KINASE_ACTIVITY	Y	0.00686204	12	0.0636235	0.0542368	1.17307	0.240789	0.485233
GO_UBIQUITIN_UBIQUITIN_LIGASE_ACTIVITY	Y	0.00740244	13	0.0200205	0.0602769	0.332143	0.739786	0.878851
GO_FMN_BINDING	Y	0.00780726	14	-0.127394	0.0872429	-1.46022	0.144252	0.363924
GO_ADENYLYLTRANSFERASE_ACTIVITY	Y	0.0121615	23	0.0167818	0.0458458	0.366049	0.714334	0.867443
GO_ATPASE_ACTIVITY_COUPLED	Y	0.087988	245	-0.0263225	0.0161587	-1.629	0.103335	0.296243
GO_S_ACYLTRANSFERASE_ACTIVITY	Y	0.0121178	23	0.0503155	0.0407556	1.23456	0.217013	0.455768
GO_ANKYRIN_BINDING	Y	0.00919881	17	0.0953706	0.0393079	2.42625	0.0152684	0.0998899
GO_PROTEASOME_BINDING	Y	0.00738747	13	-0.0516399	0.0753155	-0.685648	0.492946	0.716662
GO_DNA_N_GLYCOSYLASE_ACTIVITY	Y	0.00730787	13	-0.136828	0.0950765	-1.43913	0.150136	0.370946
GO_PHOSPHATIDYLINOSITOL_MONOPHOSPHATE_PHOSPHATASE_ACTIVITY	Y	0.00722769	13	0.110487	0.0417621	2.64563	0.00816302	0.0648158
GO_PROTEIN_DIMERIZATION_ACTIVITY	Y	0.242387	921	0.0112299	0.00766302	1.46546	0.142818	0.3635
GO_TRANSFERASE_ACTIVITY_TRANSFERRING_ALKYL_OR_ARYL_OTHER_THAN_METHYL_GROUPS	Y	0.0190042	39	-0.0918487	0.048044	-1.91176	0.0559273	0.217738
GO_UNFOLDED_PROTEIN_BINDING	Y	0.0332056	75	-0.0571754	0.031725	-1.80222	0.0715328	0.242229
GO_POLY_A_BINDING	Y	0.00582759	10	0.0773824	0.0576765	1.34166	0.179728	0.419515
GO_ATPASE_ACTIVATOR_ACTIVITY	Y	0.00839166	15	0.00814231	0.0583471	0.13955	0.889018	0.948791
GO_CARBOHYDRATE_PHOSPHATASE_ACTIVITY	Y	0.00534561	9	0.0492611	0.0651489	0.756131	0.449583	0.684694
GO_VIRUS_RECEPTOR_ACTIVITY	Y	0.0268309	58	0.0188752	0.0286883	0.657939	0.510588	0.730872
GO_NUCLEOSOME_BINDING	Y	0.0191169	39	-0.0435364	0.0424352	-1.02595	0.304933	0.556271
GO_UBIQUITIN_LIKE_PROTEIN_CONJUGATING_ENZYME_ACTIVITY	Y	0.0139347	27	0.0419881	0.0387715	1.08296	0.278844	0.53396
GO_ATP_DEPENDENT_MICROTUBULE_MOTOR_ACTIVITY	Y	0.00935532	17	0.0182342	0.0530116	0.343966	0.730877	0.872395
GO_C2H2_ZINC_FINGER_DOMAIN_BINDING	Y	0.00775201	14	0.100211	0.043773	2.28932	0.0220753	0.125816
GO_CALCIUM_ACTIVATED_POTASSIUM_CHANNEL_ACTIVITY	Y	0.00786798	14	-0.069051	0.0752056	-0.918163	0.358549	0.604523
GO_ACTIN_BINDING	Y	0.111556	331	0.0331781	0.0116407	2.85019	0.0043757	0.0410609
GO_PHOSPHATIDYLINOSITOL_4_5_BISPHOSPHATE_BINDING	Y	0.0209739	44	0.0789907	0.0266486	2.96416	0.00304018	0.0317341
GO_PRENYLTRANSFERASE_ACTIVITY	Y	0.00731851	13	-0.127285	0.0880428	-1.44572	0.148278	0.368316
GO_ANION_CATION_SYMPORTER_ACTIVITY	Y	0.0236513	50	0.0245421	0.0303188	0.809471	0.418258	0.656633
GO_LYSINE_ACETYLATED_HISTONE_BINDING	Y	0.00825221	15	0.0949349	0.0433213	2.19142	0.0284381	0.148415
GO_PEPTIDE_HORMONE_RECEPTOR_BINDING	Y	0.00789796	14	-0.0213229	0.0661297	-0.322441	0.747124	0.881998
GO_INORGANIC_ANION_TRANSMEMBRANE_TRANSPORTER_ACTIVITY	Y	0.0419613	99	-0.0359723	0.0260438	-1.38123	0.167232	0.401442
GO_PROTEIN_KINASE_A_BINDING	Y	0.0190559	39	0.0555269	0.0308296	1.80109	0.0717098	0.242229
GO_MANNOSIDASE_ACTIVITY	Y	0.0077658	14	0.0964297	0.0442082	2.18126	0.0291804	0.14981
GO_RNA_POLYMERASE_I_ACTIVITY	Y	0.0053187	10	-0.643856	0.187256	-3.43837	0.000586922	0.00851954
GO_KINASE_BINDING	Y	0.159984	529	0.0435542	0.00903187	4.82228	1.43421e-06	4.7585e-05
GO_METAL_ION_TRANSMEMBRANE_TRANSPORTER_ACTIVITY	Y	0.118542	357	0.0217116	0.0116298	1.86689	0.0619374	0.224659
GO_COA_HYDROLASE_ACTIVITY	Y	0.00873097	16	-0.15519	0.0834541	-1.85959	0.0629649	0.226722
GO_ADRENERGIC_RECEPTOR_ACTIVITY	Y	0.00588305	10	-0.0147949	0.0767312	-0.192815	0.847107	0.930215
GO_GATED_CHANNEL_ACTIVITY	Y	0.094334	267	0.00744731	0.0140005	0.531932	0.594781	0.792757
GO_RNA_DNA_HYBRID_RIBONUCLEASE_ACTIVITY	Y	0.00315345	5	-0.133001	0.144165	-0.922558	0.356254	0.602841
GO_HISTONE_DEACETYLASE_BINDING	Y	0.0401159	94	0.0438644	0.0207925	2.10963	0.0349077	0.166559
GO_ACTIN_FILAMENT_BINDING	Y	0.0422968	100	0.0343508	0.0208163	1.65019	0.0989272	0.286303
GO_HYDROLASE_ACTIVITY_ACTING_ON_CARBON_NITROGEN_BUT_NOT_PEPTIDE_BONDS_IN_LINEAR_AMIDINES	Y	0.00568016	10	-0.270857	0.128219	-2.11245	0.0346652	0.166559
GO_PROTEIN_KINASE_ACTIVITY	Y	0.167599	564	0.0511836	0.00859451	5.95539	2.65666e-09	1.89849e-07
GO_HEPARIN_BINDING	Y	0.054971	137	-0.00964107	0.0205008	-0.470279	0.638163	0.818859
GO_EPIDERMAL_GROWTH_FACTOR_RECEPTOR_BINDING	Y	0.0144164	28	0.00746952	0.042822	0.174432	0.861529	0.938288
GO_LOW_DENSITY_LIPOPROTEIN_PARTICLE_BINDING	Y	0.0074045	13	-0.0145235	0.0672496	-0.215964	0.829019	0.92725
GO_SERINE_HYDROLASE_ACTIVITY	Y	0.0582882	149	-0.0940583	0.02471	-3.80649	0.000141551	0.00257845
GO_TRANSMEMBRANE_RECEPTOR_PROTEIN_TYROSINE_KINASE_ACTIVITY	Y	0.026993	59	0.0677892	0.0241385	2.80835	0.00498653	0.0449756
GO_WNT_PROTEIN_BINDING	Y	0.0143597	28	0.0499036	0.0368681	1.35357	0.175895	0.411603
GO_TRANSFERASE_ACTIVITY_TRANSFERRING_HEXOSYL_GROUPS	Y	0.0611225	156	-0.0170194	0.0196504	-0.866113	0.386443	0.627933
GO_ARYL_SULFOTRANSFERASE_ACTIVITY	Y	0.00318857	5	-0.0185349	0.109668	-0.169009	0.865792	0.939627
GO_PROTEIN_SERINE_THREONINE_PHOSPHATASE_INHIBITOR_ACTIVITY	Y	0.00576924	10	-0.180211	0.110953	-1.62421	0.104354	0.296466
GO_HYDRO_LYASE_ACTIVITY	Y	0.0202699	42	-0.0829624	0.0449775	-1.84453	0.0651267	0.230048
GO_TRANSLATION_INITIATION_FACTOR_ACTIVITY	Y	0.0195745	40	0.00932818	0.0356366	0.261758	0.793512	0.911214
GO_LIPOPROTEIN_PARTICLE_RECEPTOR_BINDING	Y	0.0098364	18	-0.00197567	0.0550135	-0.0359125	0.971353	0.988155
GO_LIGAND_GATED_CHANNEL_ACTIVITY	Y	0.0482661	117	-0.0120329	0.0223286	-0.5389	0.589965	0.789736
GO_RHO_GTPASE_BINDING	Y	0.0312517	70	0.058646	0.0228722	2.56407	0.0103556	0.0769625
GO_PROTEIN_HOMODIMERIZATION_ACTIVITY	Y	0.178098	606	0.0107107	0.0093325	1.14767	0.251123	0.499218
GO_POLY_PYRIMIDINE_TRACT_BINDING	Y	0.00827262	15	0.0890774	0.044585	1.99792	0.0457444	0.194048
GO_PROTEIN_PHOSPHORYLATED_AMINO_ACID_BINDING	Y	0.0117028	22	0.0164308	0.0468995	0.350341	0.726088	0.870412
GO_COLLAGEN_BINDING	Y	0.0279978	61	0.0193698	0.0279456	0.693127	0.488241	0.715382
GO_REGULATORY_REGION_NUCLEIC_ACID_BINDING	Y	0.190513	671	0.0574662	0.00782553	7.34342	2.19678e-13	5.10202e-11
GO_TRIGLYCERIDE_LIPASE_ACTIVITY	Y	0.00679683	12	-0.153259	0.0965292	-1.5877	0.112377	0.31351
GO_N_METHYLTRANSFERASE_ACTIVITY	Y	0.0313072	70	0.0510485	0.0234043	2.18116	0.0291879	0.14981
GO_TRANSCRIPTIONAL_ACTIVATOR_ACTIVITY_RNA_POLYMERASE_II_TRANSCRIPTION_REGULATORY_REGION_SEQUENCE_SPECIFIC_BINDING	Y	0.0997148	291	0.0713859	0.0110376	6.46754	1.02917e-10	1.19512e-08
GO_L_AMINO_ACID_TRANSMEMBRANE_TRANSPORTER_ACTIVITY	Y	0.0236135	50	0.0390974	0.0288079	1.35718	0.174747	0.411603
GO_ACETYLCHOLINE_RECEPTOR_ACTIVITY	Y	0.0116503	22	-0.0716456	0.0608441	-1.17753	0.239005	0.484111
GO_CALCIUM_ACTIVATED_CATION_CHANNEL_ACTIVITY	Y	0.0116815	22	-0.0457846	0.0566688	-0.807934	0.419142	0.656633
GO_KINASE_REGULATOR_ACTIVITY	Y	0.0633869	164	0.048384	0.0155584	3.10983	0.00187571	0.0209944
GO_ENDONUCLEASE_ACTIVITY_ACTIVE_WITH_EITHER_RIBO_OR_DEOXYRIBONUCLEIC_ACIDS_AND_PRODUCING_5_PHOSPHOMONOESTERS	Y	0.0130617	25	-0.0303318	0.0508585	-0.596395	0.550921	0.756592
GO_CARBOXYPEPTIDASE_ACTIVITY	Y	0.0165114	33	-0.075532	0.0497733	-1.51752	0.129158	0.342181
GO_ATPASE_REGULATOR_ACTIVITY	Y	0.0139726	27	0.00237603	0.04432	0.0536108	0.957246	0.984808
GO_PHOSPHATIDYLINOSITOL_PHOSPHATE_BINDING	Y	0.0438592	105	0.0562232	0.0187976	2.99098	0.00278567	0.0297458
GO_GTPASE_INHIBITOR_ACTIVITY	Y	0.00739587	13	0.0322619	0.0579609	0.556615	0.5778	0.780197
GO_PHOSPHATIDYLINOSITOL_PHOSPHATE_5_PHOSPHATASE_ACTIVITY	Y	0.00638528	11	0.0383624	0.0614716	0.624066	0.532594	0.745151
GO_ATPASE_ACTIVITY_COUPLED_TO_TRANSMEMBRANE_MOVEMENT_OF_IONS_PHOSPHORYLATIVE_MECHANISM	Y	0.0147961	29	-0.0653083	0.0520887	-1.25379	0.209939	0.450424
GO_GLUCOSIDASE_ACTIVITY	Y	0.00482901	8	-0.0360791	0.0916092	-0.393837	0.693708	0.858128
GO_ORGANIC_HYDROXY_COMPOUND_TRANSMEMBRANE_TRANSPORTER_ACTIVITY	Y	0.0232339	49	0.0315138	0.029916	1.05341	0.292172	0.548339
GO_EXTRACELLULAR_MATRIX_STRUCTURAL_CONSTITUENT	Y	0.0299114	66	-0.0263131	0.0309782	-0.849406	0.39567	0.633755
GO_SOLUTE_PROTON_ANTIPORTER_ACTIVITY	Y	0.00831182	15	-0.110503	0.0803915	-1.37456	0.169289	0.404293
GO_ACIDIC_AMINO_ACID_TRANSMEMBRANE_TRANSPORTER_ACTIVITY	Y	0.00786864	14	0.0530701	0.0515254	1.02998	0.303038	0.555469
GO_ENDORIBONUCLEASE_ACTIVITY_PRODUCING_5_PHOSPHOMONOESTERS	Y	0.0112396	21	-0.0198452	0.0537958	-0.368899	0.712209	0.867158
GO_LYSOPHOSPHOLIPASE_ACTIVITY	Y	0.00885782	16	-0.048103	0.0666833	-0.721366	0.470697	0.704097
GO_ADRENERGIC_RECEPTOR_BINDING	Y	0.00980523	18	0.0461514	0.0465561	0.991307	0.321553	0.570081
GO_NUCLEOSIDE_DIPHOSPHATASE_ACTIVITY	Y	0.00740467	13	-0.013747	0.0671105	-0.204841	0.837699	0.92725
GO_ACETYLTRANSFERASE_ACTIVITY	Y	0.0369718	85	0.0271419	0.0231013	1.1749	0.240053	0.484803
GO_PASSIVE_TRANSMEMBRANE_TRANSPORTER_ACTIVITY	Y	0.120993	366	0.00139916	0.0122268	0.114435	0.908895	0.961244
GO_RNA_POLYMERASE_II_CORE_BINDING	Y	0.0102476	19	0.0610657	0.0433409	1.40896	0.158869	0.384347
GO_MRNA_BINDING	Y	0.0542427	138	0.0888736	0.0149058	5.96233	2.54644e-09	1.89849e-07
GO_MHC_CLASS_II_RECEPTOR_ACTIVITY	Y	0.00261213	4	-0.0380007	0.129837	-0.29268	0.769771	0.899892
GO_NEUROPEPTIDE_RECEPTOR_ACTIVITY	Y	0.0157056	31	-0.042379	0.0471734	-0.898366	0.369006	0.61362
GO_EXTRACELLULAR_MATRIX_BINDING	Y	0.0216122	45	0.0310774	0.0312457	0.994612	0.319942	0.568626
GO_SEROTONIN_RECEPTOR_ACTIVITY	Y	0.00639781	11	-0.00512052	0.0710578	-0.0720614	0.942554	0.977269
GO_METALLOEXOPEPTIDASE_ACTIVITY	Y	0.0211716	44	-0.0516008	0.0406721	-1.2687	0.204567	0.44716
GO_TRNA_BINDING	Y	0.0156896	31	-0.0532357	0.0486005	-1.09537	0.273372	0.528302
GO_CALCIUM_ION_BINDING	Y	0.160974	530	-0.00324099	0.0103628	-0.312753	0.754473	0.888346
GO_NITRIC_OXIDE_SYNTHASE_BINDING	Y	0.00875574	16	0.0875445	0.0430288	2.03455	0.0419146	0.185422
GO_PROTEIN_C_TERMINUS_BINDING	Y	0.0644728	167	0.0366799	0.0160565	2.28442	0.0223616	0.126271
GO_GLYCINE_BINDING	Y	0.00525032	9	-0.191512	0.120327	-1.59159	0.111499	0.311996
GO_THIOLESTER_HYDROLASE_ACTIVITY	Y	0.0133727	26	-0.116775	0.0611045	-1.91106	0.0560167	0.217738
GO_INSULIN_RECEPTOR_BINDING	Y	0.0139683	28	0.117554	0.0298814	3.934	8.39453e-05	0.00170654
GO_R_SMAD_BINDING	Y	0.01216	23	0.0191803	0.0454681	0.421841	0.673147	0.845725
GO_CIS_TRANS_ISOMERASE_ACTIVITY	Y	0.0156687	31	-0.0653614	0.0502173	-1.30157	0.193084	0.43223
GO_METALLOCARBOXYPEPTIDASE_ACTIVITY	Y	0.011604	22	-0.101701	0.0650869	-1.56254	0.118183	0.323632
GO_ALDEHYDE_DEHYDROGENASE_NAD_ACTIVITY	Y	0.00874318	16	-0.146705	0.0840422	-1.74562	0.0808994	0.257681
GO_OXIDOREDUCTASE_ACTIVITY_ACTING_ON_PAIRED_DONORS_WITH_INCORPORATION_OR_REDUCTION_OF_MOLECULAR_OXYGEN_2_OXOGLUTARATE_AS_ONE_DONOR_AND_INCORPORATION_OF_ONE_ATOM_EACH_OF_OXYGEN_INTO_BOTH_DONORS	Y	0.0186284	38	0.0577913	0.0311813	1.8534	0.0638465	0.228128
GO_PHOSPHATE_ION_BINDING	Y	0.00536361	9	0.00332261	0.0764817	0.0434433	0.965349	0.986657
GO_NUCLEOSIDE_DIPHOSPHATE_KINASE_ACTIVITY	Y	0.00731249	13	-0.132717	0.090785	-1.46188	0.143796	0.363924
GO_FAD_BINDING	Y	0.0072682	13	-0.170621	0.0968776	-1.7612	0.0782268	0.254992
GO_CLATHRIN_BINDING	Y	0.0256636	55	0.00807152	0.0305252	0.264421	0.791459	0.909982
GO_CATION_CATION_ANTIPORTER_ACTIVITY	Y	0.0126221	24	0.00198286	0.0470627	0.0421323	0.966394	0.986657
GO_PROTEASE_BINDING	Y	0.0377171	87	0.0208532	0.0233332	0.893717	0.371489	0.61408
GO_RAN_GTPASE_BINDING	Y	0.013948	27	0.0344549	0.0398917	0.863709	0.387762	0.628676
GO_ANTIPORTER_ACTIVITY	Y	0.0280081	61	-0.0125867	0.0309296	-0.406946	0.684054	0.849581
GO_AMMONIUM_TRANSMEMBRANE_TRANSPORTER_ACTIVITY	Y	0.0107655	20	0.0297429	0.0470329	0.632384	0.527147	0.741999
GO_PHOSPHATASE_ACTIVATOR_ACTIVITY	Y	0.00373035	6	0.060399	0.0779673	0.774671	0.438547	0.676761
GO_FATTY_ACID_BINDING	Y	0.0102078	19	-0.110367	0.0718738	-1.53557	0.124667	0.335481
GO_AMINOPEPTIDASE_ACTIVITY	Y	0.0187334	38	0.0122342	0.0362077	0.33789	0.735451	0.87482
GO_NADPH_BINDING	Y	0.00533317	9	-0.0839258	0.0969371	-0.865775	0.386628	0.627933
GO_SINGLE_STRANDED_RNA_BINDING	Y	0.0260488	57	0.0852377	0.0230049	3.70519	0.000212042	0.00364028
GO_CATECHOLAMINE_BINDING	Y	0.0063866	11	-0.0430912	0.0793786	-0.542857	0.587237	0.787649
GO_CALCIUM_DEPENDENT_PROTEIN_BINDING	Y	0.022858	48	-0.0170888	0.0353157	-0.483886	0.628474	0.811807
GO_NUCLEOCYTOPLASMIC_TRANSPORTER_ACTIVITY	Y	0.0107708	20	0.0234579	0.0480606	0.48809	0.625494	0.811807
GO_GLUTATHIONE_PEROXIDASE_ACTIVITY	Y	0.00617861	11	-0.26607	0.154132	-1.72625	0.0843246	0.262824
GO_PSEUDOURIDINE_SYNTHASE_ACTIVITY	Y	0.00683617	12	-0.115157	0.0896498	-1.28452	0.198981	0.438046
GO_G_PROTEIN_COUPLED_RECEPTOR_ACTIVITY	Y	0.115714	347	-0.041902	0.0142146	-2.94781	0.0032056	0.0329199
GO_MAP_KINASE_ACTIVITY	Y	0.00786787	14	0.0536078	0.0515406	1.04011	0.298308	0.555366
GO_NEUROPEPTIDE_HORMONE_ACTIVITY	Y	0.00948734	18	-0.260623	0.0976638	-2.66857	0.00762623	0.0632569
GO_CATION_TRANSMEMBRANE_TRANSPORTER_ACTIVITY	Y	0.156563	511	0.000421977	0.0104339	0.0404427	0.967741	0.986862
GO_CHANNEL_REGULATOR_ACTIVITY	Y	0.0465339	112	0.0194364	0.0206711	0.940268	0.347096	0.596605
GO_INOSITOL_TETRAKISPHOSPHATE_PHOSPHATASE_ACTIVITY	Y	0.00584609	10	0.0654605	0.0587714	1.11382	0.265377	0.521216
GO_PHOSPHOLIPASE_BINDING	Y	0.00870893	16	0.0997533	0.0405276	2.46137	0.0138527	0.0932546
GO_STRUCTURAL_CONSTITUENT_OF_EYE_LENS	Y	0.00721841	13	-0.210648	0.111498	-1.88925	0.0588793	0.222974
GO_DISULFIDE_OXIDOREDUCTASE_ACTIVITY	Y	0.0124878	24	-0.113375	0.0637951	-1.77718	0.0755602	0.24804
GO_GDP_BINDING	Y	0.0240239	51	0.0358881	0.0288256	1.24501	0.21315	0.451062
GO_PHOSPHORIC_DIESTER_HYDROLASE_ACTIVITY	Y	0.0340151	77	-0.0382441	0.0297374	-1.28606	0.198444	0.438046
GO_S100_PROTEIN_BINDING	Y	0.00628478	11	-0.167136	0.106439	-1.57026	0.116378	0.319868
GO_KINASE_ACTIVITY	Y	0.206061	741	0.040032	0.00782751	5.11427	3.19113e-07	1.4117e-05
GO_TRANSCRIPTION_FACTOR_ACTIVITY_RNA_POLYMERASE_II_DISTAL_ENHANCER_SEQUENCE_SPECIFIC_BINDING	Y	0.0365995	85	0.073267	0.0197962	3.70107	0.000215517	0.00364028
GO_CARBOHYDRATE_DERIVATIVE_TRANSPORTER_ACTIVITY	Y	0.0157353	31	0.00828512	0.0405906	0.204114	0.838267	0.92725
GO_ANTIOXIDANT_ACTIVITY	Y	0.0209491	44	-0.124366	0.0509603	-2.44045	0.0146814	0.0974213
GO_SERINE_TYPE_CARBOXYPEPTIDASE_ACTIVITY	Y	0.00587603	10	-0.0384155	0.0820246	-0.46834	0.639548	0.819504
GO_HORMONE_ACTIVITY	Y	0.0311037	70	-0.106796	0.0401974	-2.65679	0.00789783	0.064277
GO_STEROID_HORMONE_RECEPTOR_ACTIVITY	Y	0.0256805	56	0.0836334	0.0233948	3.57487	0.000351578	0.00553586
GO_ANDROGEN_RECEPTOR_BINDING	Y	0.0177249	36	0.0708635	0.0302639	2.34152	0.0192193	0.113005
GO_AMIDE_TRANSMEMBRANE_TRANSPORTER_ACTIVITY	Y	0.00790065	14	-0.0115749	0.0642294	-0.180212	0.856989	0.935262
GO_MANGANESE_ION_BINDING	Y	0.0212284	44	-0.0153127	0.0367091	-0.417137	0.676585	0.845958
GO_RNA_CAP_BINDING	Y	0.00638241	11	0.0421029	0.0608962	0.691388	0.489333	0.715382
GO_SCAVENGER_RECEPTOR_ACTIVITY	Y	0.0165039	34	-0.222795	0.0678021	-3.28596	0.00101884	0.0131459
GO_CYCLIN_DEPENDENT_PROTEIN_SERINE_THREONINE_KINASE_INHIBITOR_ACTIVITY	Y	0.00482733	8	0.0351344	0.0730423	0.481015	0.630513	0.812409
GO_ICOSANOID_RECEPTOR_ACTIVITY	Y	0.0077451	14	-0.176806	0.0921735	-1.91818	0.0551079	0.217525
GO_METALLOENDOPEPTIDASE_ACTIVITY	Y	0.041327	97	0.00121521	0.023529	0.0516471	0.958811	0.985326
GO_PHOSPHATIDYLCHOLINE_BINDING	Y	0.00829484	15	-0.124367	0.0819811	-1.51702	0.129285	0.342181
GO_TRANSLATION_ELONGATION_FACTOR_ACTIVITY	Y	0.00789387	14	-0.0311959	0.0681566	-0.457709	0.647169	0.824685
GO_MONOSACCHARIDE_TRANSMEMBRANE_TRANSPORTER_ACTIVITY	Y	0.00934502	17	0.0331817	0.050357	0.65893	0.509952	0.730872
GO_HYDROLASE_ACTIVITY_ACTING_ON_ESTER_BONDS	Y	0.175038	592	0.000151894	0.00973086	0.0156095	0.987546	0.995246
GO_CAMP_BINDING	Y	0.0107565	20	0.0377983	0.0457016	0.827066	0.408214	0.649875
GO_GLYCOSAMINOGLYCAN_BINDING	Y	0.0668113	174	-0.016942	0.0186169	-0.910038	0.362818	0.609508
GO_VITAMIN_D_RECEPTOR_BINDING	Y	0.00787029	14	0.0518752	0.0518848	0.999816	0.317417	0.566974
GO_DAMAGED_DNA_BINDING	Y	0.020729	43	-0.0652031	0.0429231	-1.51907	0.128768	0.342181
GO_1_PHOSPHATIDYLINOSITOL_3_KINASE_ACTIVITY	Y	0.018735	38	-0.00986514	0.0388267	-0.254081	0.799436	0.915754
GO_PROTEIN_SERINE_THREONINE_KINASE_ACTIVATOR_ACTIVITY	Y	0.00831339	15	0.0749629	0.0458216	1.63597	0.101867	0.292987
GO_PHOSPHOLIPID_TRANSLOCATING_ATPASE_ACTIVITY	Y	0.00690031	12	0.0232822	0.0619811	0.375635	0.707194	0.866733
GO_ALCOHOL_BINDING	Y	0.034077	77	0.00610803	0.0259847	0.235062	0.814164	0.923514
GO_L_ASCORBIC_ACID_BINDING	Y	0.00930974	17	-0.0769573	0.0697541	-1.10327	0.269931	0.525715
GO_DIPEPTIDASE_ACTIVITY	Y	0.00635144	11	-0.0957165	0.0907098	-1.05519	0.291354	0.548339
GO_GLUTAMATE_RECEPTOR_ACTIVITY	Y	0.0116744	22	0.042972	0.0429713	1.00002	0.317319	0.566974
GO_GAMMA_TUBULIN_BINDING	Y	0.0103083	19	0.00970993	0.0515873	0.188223	0.850704	0.931963
GO_PEPTIDASE_ACTIVATOR_ACTIVITY	Y	0.0160537	32	-0.0882827	0.0527408	-1.6739	0.094173	0.279982
GO_POLY_PURINE_TRACT_BINDING	Y	0.00866461	16	0.109305	0.0411227	2.65802	0.00786902	0.064277
GO_INTRONIC_TRANSCRIPTION_REGULATORY_REGION_DNA_BINDING	Y	0.00586003	10	0.053719	0.0610533	0.87987	0.378945	0.621973
GO_HYDROLASE_ACTIVITY_ACTING_ON_ACID_ANHYDRIDES	Y	0.190417	663	-0.0182482	0.00971302	-1.87873	0.0603016	0.223977
GO_STEROL_BINDING	Y	0.0148047	29	0.0480575	0.0366913	1.30978	0.190292	0.429082
GO_RNA_POLYMERASE_II_TRANSCRIPTION_FACTOR_ACTIVITY_SEQUENCE_SPECIFIC_DNA_BINDING	Y	0.165429	557	0.0618823	0.00842487	7.34519	2.16804e-13	5.10202e-11
GO_PHOSPHATIDYLINOSITOL_BINDING	Y	0.0683973	180	0.0464762	0.0149439	3.11005	0.00187433	0.0209944
GO_TRANSFORMING_GROWTH_FACTOR_BETA_BINDING	Y	0.00837408	15	0.0392828	0.052479	0.748544	0.454145	0.687134
GO_SH3_DOMAIN_BINDING	Y	0.0421709	100	0.0511691	0.0196825	2.59973	0.00933952	0.0714116
GO_LIGASE_ACTIVITY_FORMING_CARBON_SULFUR_BONDS	Y	0.017873	36	-0.0285262	0.042203	-0.675928	0.499098	0.719972
GO_MANNOSE_BINDING	Y	0.00783717	14	0.070921	0.0481912	1.47166	0.141136	0.362473
GO_RNA_POLYMERASE_II_REPRESSING_TRANSCRIPTION_FACTOR_BINDING	Y	0.0128913	25	0.0862168	0.034258	2.51669	0.0118574	0.0847349
GO_CATION_SUGAR_SYMPORTER_ACTIVITY	Y	0.0083899	15	0.0151697	0.0570047	0.266113	0.790156	0.90961
GO_PROTEIN_SERINE_THREONINE_PHOSPHATASE_ACTIVITY	Y	0.0275947	60	0.0264679	0.0275148	0.96195	0.336091	0.586884
GO_TRANSCRIPTION_FACTOR_ACTIVITY_RNA_POLYMERASE_II_TRANSCRIPTION_FACTOR_BINDING	Y	0.0492454	122	0.0797097	0.0161926	4.92261	8.63684e-07	3.00346e-05
GO_AMINOACYL_TRNA_EDITING_ACTIVITY	Y	0.00429514	7	-0.0228115	0.0938969	-0.242942	0.808054	0.919953
GO_FOLIC_ACID_BINDING	Y	0.00523462	9	-0.209539	0.123584	-1.69551	0.09	0.272148
GO_NEUTRAL_AMINO_ACID_TRANSMEMBRANE_TRANSPORTER_ACTIVITY	Y	0.0152743	30	0.0330496	0.0379361	0.871191	0.383665	0.627241
GO_E_BOX_BINDING	Y	0.0169984	34	0.0372843	0.0352342	1.05818	0.28999	0.548339
GO_GLUCOSE_BINDING	Y	0.00584283	10	-0.0947009	0.0952489	-0.994247	0.32012	0.568626
GO_NEUROTRANSMITTER_SODIUM_SYMPORTER_ACTIVITY	Y	0.00980137	18	0.0486329	0.0461667	1.05342	0.292167	0.548339
GO_NUCLEASE_ACTIVITY	Y	0.0600423	153	-0.0412407	0.0213847	-1.92852	0.0538112	0.214552
GO_DIPEPTIDYL_PEPTIDASE_ACTIVITY	Y	0.00636132	11	0.0616364	0.0562888	1.095	0.273534	0.528302
GO_TOXIC_SUBSTANCE_BINDING	Y	0.0052111	9	-0.236079	0.127654	-1.84937	0.0644256	0.229316
GO_ESTRADIOL_17_BETA_DEHYDROGENASE_ACTIVITY	Y	0.00428745	7	-0.0510653	0.101403	-0.503589	0.614558	0.805452
GO_GDP_DISSOCIATION_INHIBITOR_ACTIVITY	Y	0.00568238	10	-0.268642	0.130718	-2.05513	0.0398849	0.180984
GO_POLYSACCHARIDE_BINDING	Y	0.00836575	15	-0.0579456	0.0716112	-0.80917	0.418431	0.656633
GO_SNAP_RECEPTOR_ACTIVITY	Y	0.0174629	35	0.00597403	0.0384955	0.155188	0.876676	0.943306
GO_MICROTUBULE_SEVERING_ATPASE_ACTIVITY	Y	0.00588249	10	0.016438	0.0696535	0.235997	0.813438	0.923514
GO_RRNA_METHYLTRANSFERASE_ACTIVITY	Y	0.00536241	9	0.0141037	0.0738539	0.190968	0.848554	0.930704
GO_NON_MEMBRANE_SPANNING_PROTEIN_TYROSINE_KINASE_ACTIVITY	Y	0.0212348	44	-0.000155155	0.0350185	-0.00443067	0.996465	0.998615
GO_H4_HISTONE_ACETYLTRANSFERASE_ACTIVITY	Y	0.00885454	16	-0.0522495	0.0678506	-0.770066	0.441273	0.679839
GO_HISTONE_DEMETHYLASE_ACTIVITY	Y	0.0134162	26	0.0681379	0.0361981	1.88236	0.0598077	0.223977
GO_EXONUCLEASE_ACTIVITY	Y	0.0283996	62	-0.00664854	0.0301267	-0.220686	0.82534	0.927136
GO_MACROLIDE_BINDING	Y	0.00838893	15	-0.0192857	0.0635197	-0.303618	0.761424	0.893524
GO_INSULIN_LIKE_GROWTH_FACTOR_BINDING	Y	0.0121454	23	0.0341935	0.0431809	0.791868	0.428451	0.667135
GO_O_METHYLTRANSFERASE_ACTIVITY	Y	0.00878405	16	-0.116835	0.0783538	-1.49112	0.135954	0.354778
GO_TROPOMYOSIN_BINDING	Y	0.00480886	8	0.0610625	0.0680023	0.897948	0.369229	0.61362
GO_AMINO_ACID_TRANSMEMBRANE_TRANSPORTER_ACTIVITY	Y	0.032135	72	0.0370956	0.024199	1.53294	0.125314	0.335494
GO_EXORIBONUCLEASE_ACTIVITY	Y	0.0152979	30	-0.00892025	0.043572	-0.204724	0.837791	0.92725
GO_LYSOZYME_ACTIVITY	Y	0.00354692	6	-0.40401	0.205361	-1.96731	0.0491666	0.204824
GO_ANION_CHANNEL_ACTIVITY	Y	0.030149	67	-0.0713357	0.0347274	-2.05416	0.0399783	0.180984
GO_STRUCTURAL_CONSTITUENT_OF_NUCLEAR_PORE	Y	0.00583156	10	-0.109445	0.0987059	-1.1088	0.267535	0.523242
GO_NUCLEOTIDASE_ACTIVITY	Y	0.00587642	10	0.0323301	0.0658333	0.491091	0.62337	0.811807
GO_ION_ANTIPORTER_ACTIVITY	Y	0.0203629	42	-0.0446166	0.0411069	-1.08538	0.277772	0.533162
GO_PHOSPHORIC_ESTER_HYDROLASE_ACTIVITY	Y	0.107745	316	0.0181992	0.0124726	1.45913	0.144551	0.363924
GO_SIGNALING_RECEPTOR_ACTIVITY	Y	0.210394	758	0.00670061	0.00849487	0.788783	0.430252	0.668402
GO_SUGAR_TRANSMEMBRANE_TRANSPORTER_ACTIVITY	Y	0.0139524	27	0.0314586	0.0402141	0.782276	0.434065	0.672078
GO_INTERLEUKIN_1_RECEPTOR_BINDING	Y	0.00639659	11	-0.0143251	0.0730843	-0.196007	0.844607	0.928933
GO_PROTEIN_TRANSPORTER_ACTIVITY	Y	0.0388247	90	0.00664278	0.0240063	0.276709	0.782007	0.905842
GO_IMMUNOGLOBULIN_RECEPTOR_BINDING	Y	0.00255356	4	-0.220996	0.181413	-1.2182	0.22317	0.461501
GO_RECEPTOR_ACTIVATOR_ACTIVITY	Y	0.0139713	27	0.0087555	0.0434221	0.201637	0.840203	0.928051
GO_PHOSPHATE_ION_TRANSMEMBRANE_TRANSPORTER_ACTIVITY	Y	0.00886013	16	-0.0450155	0.0660732	-0.681297	0.495695	0.718478
GO_ALCOHOL_DEHYDROGENASE_NADP_ACTIVITY	Y	0.00690034	12	-0.0257168	0.0723329	-0.355534	0.722195	0.870412
GO_NEUROTRANSMITTER_RECEPTOR_ACTIVITY	Y	0.0224589	47	-0.00829624	0.0347556	-0.238702	0.81134	0.922564
GO_DIACYLGLYCEROL_BINDING	Y	0.00586737	10	-0.0566674	0.0860079	-0.658864	0.509994	0.730872
GO_PHOSPHOLIPASE_INHIBITOR_ACTIVITY	Y	0.00636377	11	-0.0798459	0.0867732	-0.920168	0.357501	0.603851
GO_ACTININ_BINDING	Y	0.0139223	27	0.0477379	0.0382003	1.24967	0.211439	0.451062
GO_PROTEIN_SERINE_THREONINE_KINASE_INHIBITOR_ACTIVITY	Y	0.0134728	26	0.0494146	0.0384695	1.28451	0.198983	0.438046
GO_OXIDOREDUCTASE_ACTIVITY_ACTING_ON_A_SULFUR_GROUP_OF_DONORS_DISULFIDE_AS_ACCEPTOR	Y	0.00639774	11	-0.00605691	0.0712552	-0.0850031	0.93226	0.97343
GO_TRANSCRIPTION_COFACTOR_BINDING	Y	0.011484	22	0.0981558	0.0349335	2.80979	0.00496421	0.0449756
GO_HSP90_PROTEIN_BINDING	Y	0.0130744	25	0.00646131	0.0454617	0.142126	0.886982	0.948224
GO_AMINE_BINDING	Y	0.00536278	9	0.0119674	0.0744179	0.160813	0.872243	0.942468
GO_PEPTIDYL_PROLINE_DIOXYGENASE_ACTIVITY	Y	0.00482789	8	-0.0395691	0.0922198	-0.429073	0.667876	0.840728
GO_DIOXYGENASE_ACTIVITY	Y	0.0329532	74	0.0127963	0.0259443	0.493222	0.621863	0.811807
GO_PHOSPHOTRANSFERASE_ACTIVITY_FOR_OTHER_SUBSTITUTED_PHOSPHATE_GROUPS	Y	0.00979419	18	-0.0679032	0.0672652	-1.00948	0.31276	0.563089
GO_PALMITOYLTRANSFERASE_ACTIVITY	Y	0.0157237	31	0.0238913	0.0385824	0.619228	0.535776	0.746231
GO_NUCLEAR_LOCALIZATION_SEQUENCE_BINDING	Y	0.0102355	19	0.0659558	0.0428127	1.54057	0.123445	0.334344
GO_ZINC_ION_TRANSMEMBRANE_TRANSPORTER_ACTIVITY	Y	0.00982316	18	0.0311715	0.0492662	0.632715	0.52693	0.741999
GO_RECEPTOR_AGONIST_ACTIVITY	Y	0.0078999	14	-0.0148819	0.0648982	-0.229311	0.81863	0.925192
GO_PHOSPHATASE_BINDING	Y	0.0587988	149	0.0297615	0.0173628	1.7141	0.0865326	0.267963
GO_RNA_DIRECTED_DNA_POLYMERASE_ACTIVITY	Y	0.00374919	6	0.00812473	0.09224	0.0880825	0.929812	0.97343
GO_RAS_GUANYL_NUCLEOTIDE_EXCHANGE_FACTOR_ACTIVITY	Y	0.0735575	196	0.0205481	0.0156362	1.31414	0.188821	0.428144
GO_PROTEIN_METHYLTRANSFERASE_ACTIVITY	Y	0.0313591	70	0.0422071	0.0241707	1.74621	0.0807962	0.257681
GO_LYSOPHOSPHOLIPID_ACYLTRANSFERASE_ACTIVITY	Y	0.00935895	17	-0.0062413	0.0573623	-0.108805	0.913359	0.963122
GO_STRUCTURAL_CONSTITUENT_OF_MUSCLE	Y	0.0152914	30	0.0192723	0.0398873	0.483169	0.628983	0.811807
GO_ENZYME_ACTIVATOR_ACTIVITY	Y	0.125116	384	0.041044	0.0105796	3.87954	0.000105133	0.00199324
GO_SH2_DOMAIN_BINDING	Y	0.0126003	24	-0.0400926	0.0533646	-0.751296	0.452487	0.68649
GO_CARBON_CARBON_LYASE_ACTIVITY	Y	0.0207527	43	-0.0553567	0.0417168	-1.32696	0.184543	0.42541
GO_PROTEIN_COMPLEX_BINDING	Y	0.215765	787	0.0309926	0.00780361	3.97157	7.1757e-05	0.00155029
GO_TRANSFERASE_ACTIVITY_TRANSFERRING_ACYL_GROUPS	Y	0.0729848	194	0.0132504	0.0160798	0.824038	0.409932	0.649875
GO_FATTY_ACID_TRANSPORTER_ACTIVITY	Y	0.00637211	11	-0.0679845	0.0844209	-0.805304	0.420658	0.657898
GO_PROTEIN_TYROSINE_SERINE_THREONINE_PHOSPHATASE_ACTIVITY	Y	0.01701	34	0.0312595	0.03592	0.870254	0.384177	0.627241
GO_NUCLEOSIDE_KINASE_ACTIVITY	Y	0.0067394	12	-0.204085	0.106203	-1.92166	0.054669	0.217041
GO_NUCLEIC_ACID_BINDING_TRANSCRIPTION_FACTOR_ACTIVITY	Y	0.240366	925	0.0630741	0.00673479	9.36542	8.71181e-21	8.09327e-18
GO_FIBROBLAST_GROWTH_FACTOR_BINDING	Y	0.00983626	18	-0.00401978	0.055366	-0.0726037	0.942123	0.977269
GO_ADP_BINDING	Y	0.0147565	29	-0.0863689	0.0544544	-1.58608	0.112744	0.313591
GO_BETA_1_3_GALACTOSYLTRANSFERASE_ACTIVITY	Y	0.00789913	14	-0.0176897	0.065469	-0.270199	0.787011	0.908176
GO_CATION_TRANSPORTING_ATPASE_ACTIVITY	Y	0.0226266	48	-0.105908	0.044668	-2.37101	0.017753	0.108152
GO_ATPASE_COUPLED_ION_TRANSMEMBRANE_TRANSPORTER_ACTIVITY	Y	0.0258741	56	-0.0831453	0.0391071	-2.12609	0.0335129	0.162153
GO_STEROL_TRANSPORTER_ACTIVITY	Y	0.00688612	12	-0.0543425	0.0788153	-0.689492	0.490525	0.715382
GO_RNA_POLYMERASE_BINDING	Y	0.0178301	36	0.045421	0.0332572	1.36575	0.17204	0.407717
GO_CARBOHYDRATE_KINASE_ACTIVITY	Y	0.0088781	16	4.55492e-06	0.0579843	7.85543e-05	0.999937	0.999937
GO_BINDING_BRIDGING	Y	0.0587797	149	0.0323383	0.0172194	1.87802	0.0603996	0.223977
GO_THREONINE_TYPE_PEPTIDASE_ACTIVITY	Y	0.00630702	11	-0.144878	0.099847	-1.451	0.146802	0.366611
GO_MONOOXYGENASE_ACTIVITY	Y	0.0276241	60	-0.00681687	0.0306354	-0.222516	0.823915	0.926655
GO_ADENOSINE_DEAMINASE_ACTIVITY	Y	0.00536101	9	0.0202201	0.0723472	0.279487	0.779875	0.9045
GO_STRUCTURAL_CONSTITUENT_OF_RIBOSOME	Y	0.0471313	116	-0.129801	0.0303981	-4.27003	1.96735e-05	0.000468633
GO_14_3_3_PROTEIN_BINDING	Y	0.00885481	16	0.0426201	0.050135	0.850107	0.39528	0.633755
GO_COPPER_ION_BINDING	Y	0.0191038	39	-0.0506528	0.0430332	-1.17707	0.23919	0.484111
GO_MISMATCHED_DNA_BINDING	Y	0.00531152	9	-0.115798	0.107394	-1.07825	0.280939	0.535919
GO_HYDROLASE_ACTIVITY_ACTING_ON_GLYCOSYL_BONDS	Y	0.0412424	97	-0.0393523	0.0265868	-1.48015	0.138857	0.358328
GO_RAB_GTPASE_BINDING	Y	0.0435267	105	0.0788362	0.0173477	4.54446	5.55364e-06	0.000151967
GO_NAD_ADP_RIBOSYLTRANSFERASE_ACTIVITY	Y	0.0121421	23	-0.0432735	0.0549866	-0.786982	0.431305	0.668919
GO_OXYGEN_TRANSPORTER_ACTIVITY	Y	0.00419061	7	-0.218801	0.166058	-1.31762	0.187651	0.427275
GO_GUANYL_NUCLEOTIDE_EXCHANGE_FACTOR_ACTIVITY	Y	0.0924611	261	0.0313182	0.0131397	2.38347	0.0171633	0.1073
GO_TELOMERASE_RNA_BINDING	Y	0.00517804	9	-0.272848	0.14859	-1.83625	0.0663422	0.231699
GO_BETA_TUBULIN_BINDING	Y	0.0160358	32	-0.0959841	0.0539226	-1.78004	0.0750918	0.24804
GO_INTRAMOLECULAR_TRANSFERASE_ACTIVITY	Y	0.0121461	23	-0.0392252	0.0545582	-0.718961	0.472177	0.704097
GO_SERINE_TYPE_ENDOPEPTIDASE_INHIBITOR_ACTIVITY	Y	0.0298662	66	-0.0444624	0.0326996	-1.35972	0.17394	0.411171
GO_HELICASE_ACTIVITY	Y	0.0499571	122	-0.0148666	0.0220582	-0.67397	0.500341	0.720647
GO_RNA_POLYMERASE_CORE_ENZYME_BINDING	Y	0.0121125	23	0.052698	0.0406384	1.29675	0.194738	0.434879
GO_VOLTAGE_GATED_CHLORIDE_CHANNEL_ACTIVITY	Y	0.00584133	10	-0.0967223	0.094903	-1.01917	0.30814	0.55783
GO_PYRIDOXAL_PHOSPHATE_BINDING	Y	0.0202953	42	-0.0738001	0.0444203	-1.6614	0.0966546	0.282365
GO_LIPASE_INHIBITOR_ACTIVITY	Y	0.00784088	14	-0.0973467	0.0800615	-1.2159	0.224044	0.461501
GO_CHROMATIN_DNA_BINDING	Y	0.03175	71	0.0392081	0.0242952	1.61382	0.106589	0.300975
GO_ATPASE_BINDING	Y	0.0303181	67	-0.00671487	0.0289866	-0.231654	0.81681	0.925192
GO_LAMIN_BINDING	Y	0.00827723	15	0.0876632	0.0440474	1.9902	0.0465882	0.195839
GO_PHOSPHATIDYLINOSITOL_KINASE_ACTIVITY	Y	0.0212337	44	-0.00611766	0.0356755	-0.171481	0.863848	0.939516
GO_CYCLIC_NUCLEOTIDE_BINDING	Y	0.0157331	31	0.01289	0.0399861	0.322363	0.747183	0.881998
GO_CYSTEINE_TYPE_ENDOPEPTIDASE_ACTIVITY	Y	0.032212	72	-0.000361022	0.0274203	-0.0131662	0.989495	0.995246
GO_OLIGOPEPTIDE_BINDING	Y	0.0051568	9	-0.296333	0.167498	-1.76917	0.0768878	0.25151
GO_CO_SMAD_BINDING	Y	0.00583898	10	0.0704108	0.0572223	1.23048	0.218539	0.45623
GO_PHOSPHOPROTEIN_PHOSPHATASE_ACTIVITY	Y	0.0611514	157	0.0499135	0.0157905	3.16099	0.00157571	0.0182979
GO_GROWTH_FACTOR_ACTIVITY	Y	0.0492787	120	-0.0156357	0.022299	-0.701184	0.4832	0.713661
GO_INTRACELLULAR_CALCIUM_ACTIVATED_CHLORIDE_CHANNEL_ACTIVITY	Y	0.0073308	13	-0.115872	0.0877946	-1.31981	0.18692	0.426656
GO_G_PROTEIN_COUPLED_PHOTORECEPTOR_ACTIVITY	Y	0.00428663	7	-0.0533559	0.10197	-0.523252	0.600807	0.797357
GO_ALDO_KETO_REDUCTASE_NADP_ACTIVITY	Y	0.0102486	19	-0.0813078	0.0666475	-1.21997	0.222498	0.461385
GO_TRANSFERASE_ACTIVITY_TRANSFERRING_ACYL_GROUPS_OTHER_THAN_AMINO_ACYL_GROUPS	Y	0.0642711	166	0.0221447	0.0168738	1.31237	0.189416	0.428144
GO_MOLECULAR_FUNCTION_REGULATOR	Y	0.277685	1117	0.0234511	0.00680064	3.44837	0.000565643	0.00834099
GO_CYSTEINE_TYPE_ENDOPEPTIDASE_INHIBITOR_ACTIVITY_INVOLVED_IN_APOPTOTIC_PROCESS	Y	0.00973893	18	0.0758978	0.0420528	1.80482	0.0711242	0.242229
GO_FIBRONECTIN_BINDING	Y	0.012984	25	0.0641242	0.0369741	1.7343	0.0828869	0.261024
GO_POTASSIUM_TRANSPORTING_ATPASE_ACTIVITY	Y	0.00481844	8	-0.0631669	0.0986493	-0.640318	0.521976	0.741999
GO_MICROTUBULE_MOTOR_ACTIVITY	Y	0.0287253	63	-0.0419519	0.0331282	-1.26635	0.205408	0.447944
GO_OXIDOREDUCTASE_ACTIVITY_OXIDIZING_METAL_IONS	Y	0.00786354	14	-0.0740993	0.0766506	-0.966714	0.333704	0.584926
GO_ALPHA_TUBULIN_BINDING	Y	0.0121465	23	-0.038788	0.0542777	-0.714621	0.474855	0.706956
GO_EXCITATORY_EXTRACELLULAR_LIGAND_GATED_ION_CHANNEL_ACTIVITY	Y	0.0208165	43	-0.0153747	0.037128	-0.414099	0.678808	0.847598
GO_OXIDOREDUCTASE_ACTIVITY_OXIDIZING_METAL_IONS_NAD_OR_NADP_AS_ACCEPTOR	Y	0.00531478	9	-0.111297	0.107286	-1.03738	0.299575	0.555404
GO_ATPASE_ACTIVITY_COUPLED_TO_MOVEMENT_OF_SUBSTANCES	Y	0.0397908	93	-0.0469937	0.0276788	-1.69782	0.0895633	0.272148
GO_TRANSITION_METAL_ION_TRANSMEMBRANE_TRANSPORTER_ACTIVITY	Y	0.0161713	32	0.00474132	0.0404125	0.117323	0.906606	0.960361
GO_DOUBLE_STRANDED_DNA_BINDING	Y	0.179974	619	0.0468161	0.00834994	5.60676	2.10049e-08	1.3009e-06
GO_TRANSITION_METAL_ION_BINDING	Y	0.281063	1139	0.0330967	0.00658352	5.0272	5.03835e-07	1.95026e-05
GO_TELOMERIC_DNA_BINDING	Y	0.0116268	22	0.0641209	0.0401179	1.59831	0.109997	0.309657
GO_MODIFIED_AMINO_ACID_TRANSMEMBRANE_TRANSPORTER_ACTIVITY	Y	0.00690479	12	0.00600305	0.0656772	0.0914024	0.927174	0.972172
GO_SCAFFOLD_PROTEIN_BINDING	Y	0.019153	39	-0.014388	0.0388585	-0.370267	0.711189	0.867158
GO_TRANSCRIPTIONAL_REPRESSOR_ACTIVITY_RNA_POLYMERASE_II_ACTIVATING_TRANSCRIPTION_FACTOR_BINDING	Y	0.0223454	48	0.10118	0.0233577	4.33175	1.48961e-05	0.00036417
GO_LACTATE_TRANSMEMBRANE_TRANSPORTER_ACTIVITY	Y	0.00588429	10	-0.00433612	0.0743345	-0.0583325	0.953485	0.982755
GO_LOW_DENSITY_LIPOPROTEIN_PARTICLE_RECEPTOR_BINDING	Y	0.00839141	15	0.0095018	0.0580841	0.163587	0.870059	0.942468
GO_PHOSPHATIDYLSERINE_BINDING	Y	0.01528	30	0.0293315	0.0384616	0.762618	0.445704	0.680859
GO_GLYCOLIPID_BINDING	Y	0.00839234	15	-0.000988481	0.0600714	-0.0164551	0.986872	0.995246
GO_RECEPTOR_SIGNALING_PROTEIN_SERINE_THREONINE_KINASE_ACTIVITY	Y	0.0362346	85	0.0950945	0.0180702	5.26251	1.44201e-07	7.05068e-06
GO_CALMODULIN_BINDING	Y	0.062557	161	0.0388651	0.0162514	2.39149	0.0167932	0.106855
GO_RNA_POLYMERASE_II_CORE_PROMOTER_SEQUENCE_SPECIFIC_DNA_BINDING	Y	0.0226938	48	0.0638769	0.0269547	2.36979	0.0178119	0.108152
GO_MAP_KINASE_KINASE_KINASE_ACTIVITY	Y	0.010419	20	0.122654	0.0324566	3.77902	0.000158097	0.00277117
GO_MHC_CLASS_II_PROTEIN_COMPLEX_BINDING	Y	0.00787194	14	-0.0643368	0.0742938	-0.865979	0.386517	0.627933
GO_PHOSPHOTYROSINE_BINDING	Y	0.00740604	13	0.00437446	0.0634362	0.0689584	0.945024	0.977647
GO_NUCLEOSIDE_TRIPHOSPHATASE_REGULATOR_ACTIVITY	Y	0.0973184	280	0.0537246	0.0118058	4.5507	5.39184e-06	0.000151967
GO_LIGAND_GATED_CALCIUM_CHANNEL_ACTIVITY	Y	0.00886315	16	-0.0407245	0.0655315	-0.62145	0.534314	0.746231
GO_RIBOSOMAL_SMALL_SUBUNIT_BINDING	Y	0.00585874	10	0.0549602	0.0610535	0.900197	0.368031	0.61362
GO_OMEGA_PEPTIDASE_ACTIVITY	Y	0.00688872	12	-0.050077	0.0775511	-0.645729	0.518465	0.738734
GO_PHOSPHATIDYLCHOLINE_1_ACYLHYDROLASE_ACTIVITY	Y	0.0057999	10	-0.1469	0.10366	-1.41713	0.156468	0.38052
GO_ELECTRON_CARRIER_ACTIVITY	Y	0.0328667	75	-0.121472	0.0371153	-3.27284	0.00106732	0.0133992
GO_HMG_BOX_DOMAIN_BINDING	Y	0.00958383	18	0.111496	0.0369843	3.01469	0.00257703	0.0278379
GO_CHANNEL_INHIBITOR_ACTIVITY	Y	0.0152052	30	0.0601077	0.0344758	1.74347	0.0812727	0.257687
GO_SUMO_BINDING	Y	0.00785912	14	0.0593029	0.0503388	1.17807	0.238787	0.484111
GO_PALMITOYL_COA_HYDROLASE_ACTIVITY	Y	0.00532306	9	-0.0994556	0.0993346	-1.00122	0.316739	0.566974
GO_MANNOSYLTRANSFERASE_ACTIVITY	Y	0.0101953	19	-0.118481	0.0716404	-1.65383	0.0981841	0.285714
GO_RECEPTOR_SERINE_THREONINE_KINASE_BINDING	Y	0.00588396	10	0.00812157	0.0714543	0.113661	0.909508	0.961244
GO_RETINAL_BINDING	Y	0.00674429	12	-0.199878	0.102563	-1.94882	0.0513369	0.210097
GO_TRANSFERASE_ACTIVITY_TRANSFERRING_GLYCOSYL_GROUPS	Y	0.0822747	225	0.003087	0.0154323	0.200035	0.841456	0.928051
GO_TRANSFORMING_GROWTH_FACTOR_BETA_RECEPTOR_BINDING	Y	0.0191309	39	0.0303631	0.0336455	0.90244	0.366838	0.612937
GO_WW_DOMAIN_BINDING	Y	0.0134338	26	-0.0858446	0.057729	-1.48703	0.13703	0.35567
GO_PEPTIDE_N_ACETYLTRANSFERASE_ACTIVITY	Y	0.0259465	56	0.049703	0.0263254	1.88802	0.0590437	0.222974
GO_GLUCOCORTICOID_RECEPTOR_BINDING	Y	0.00780078	14	0.0854795	0.0457021	1.87036	0.0614541	0.224659
GO_PHOSPHATASE_ACTIVITY	Y	0.0853	236	0.0326008	0.0137228	2.37566	0.017531	0.107856
GO_LIGASE_REGULATOR_ACTIVITY	Y	0.00639492	11	-0.0214844	0.0746437	-0.287826	0.773484	0.90159
GO_ACTIVE_TRANSMEMBRANE_TRANSPORTER_ACTIVITY	Y	0.101018	291	0.0017649	0.0136588	0.129213	0.897191	0.951473
GO_CAMP_RESPONSE_ELEMENT_BINDING	Y	0.00654374	12	0.14803	0.0433199	3.41713	0.00063466	0.0088207
GO_POTASSIUM_ION_TRANSMEMBRANE_TRANSPORTER_ACTIVITY	Y	0.0502947	123	0.0139659	0.0200862	0.695298	0.48688	0.715382
GO_PROTEIN_DISULFIDE_OXIDOREDUCTASE_ACTIVITY	Y	0.00974032	18	-0.110156	0.0735135	-1.49845	0.134039	0.350766
GO_PHOSPHATIDYLINOSITOL_BISPHOSPHATE_BINDING	Y	0.0292761	65	0.0690646	0.0226933	3.04339	0.00234362	0.0256144
GO_CALCIUM_ION_TRANSMEMBRANE_TRANSPORTER_ACTIVITY	Y	0.0441248	105	0.0141222	0.021715	0.650345	0.51548	0.735608
GO_INTERMEDIATE_FILAMENT_BINDING	Y	0.00528892	9	0.0904815	0.0567349	1.59481	0.110777	0.310912
GO_AMIDE_BINDING	Y	0.0757332	203	0.00173028	0.0163019	0.10614	0.915473	0.964257
GO_LIPOPOLYSACCHARIDE_BINDING	Y	0.00886547	16	-0.0371663	0.0646488	-0.574896	0.565371	0.770132
GO_LIGAND_DEPENDENT_NUCLEAR_RECEPTOR_BINDING	Y	0.0111132	21	0.0806341	0.0375654	2.1465	0.0318503	0.156555
GO_POLYPEPTIDE_N_ACETYLGALACTOSAMINYLTRANSFERASE_ACTIVITY	Y	0.00935729	17	0.0132298	0.0539089	0.24541	0.806142	0.919185
GO_MODIFIED_AMINO_ACID_BINDING	Y	0.0256279	55	-0.0347111	0.0347571	-0.998675	0.317969	0.566974
GO_ION_CHANNEL_BINDING	Y	0.0403598	95	0.0565154	0.0198101	2.85286	0.0043391	0.0410609
GO_FILAMIN_BINDING	Y	0.00586488	10	-0.0611753	0.0870417	-0.702827	0.482175	0.713282
GO_PROTEOGLYCAN_BINDING	Y	0.0134576	26	0.0553697	0.0378424	1.46317	0.143445	0.363924
GO_SUMO_TRANSFERASE_ACTIVITY	Y	0.0063608	11	0.0620175	0.0561069	1.10535	0.269028	0.525058
GO_MYOSIN_HEAVY_CHAIN_BINDING	Y	0.0046658	8	-0.27804	0.143752	-1.93416	0.0531132	0.214116
GO_LRR_DOMAIN_BINDING	Y	0.00835854	15	0.0518862	0.050745	1.02249	0.306568	0.557341
GO_TRANSFERASE_ACTIVITY_TRANSFERRING_AMINO_ACYL_GROUPS	Y	0.00929403	17	-0.0903944	0.0717038	-1.26066	0.207451	0.44823
GO_INTEGRIN_BINDING	Y	0.0380188	88	0.0358888	0.0220566	1.62712	0.103734	0.296243
GO_ALCOHOL_TRANSMEMBRANE_TRANSPORTER_ACTIVITY	Y	0.0111221	21	0.0783052	0.0381497	2.05258	0.0401322	0.180984
GO_CALMODULIN_DEPENDENT_PROTEIN_KINASE_ACTIVITY	Y	0.0121036	23	0.0564024	0.0402193	1.40237	0.160826	0.388071
GO_MICROFILAMENT_MOTOR_ACTIVITY	Y	0.009821	18	-0.0388977	0.0614317	-0.633187	0.526622	0.741999
GO_THIOL_DEPENDENT_UBIQUITIN_SPECIFIC_PROTEASE_ACTIVITY	Y	0.027822	61	0.0603262	0.024211	2.49169	0.0127253	0.087569
GO_FERROUS_IRON_BINDING	Y	0.0102994	19	-0.0301959	0.0583529	-0.51747	0.604836	0.800896
GO_ACETYLCHOLINE_BINDING	Y	0.00933621	17	-0.0500631	0.0652971	-0.766697	0.443275	0.680859
GO_TRANSCRIPTION_FACTOR_ACTIVITY_RNA_POLYMERASE_II_CORE_PROMOTER_PROXIMAL_REGION_SEQUENCE_SPECIFIC_BINDING	Y	0.102099	300	0.0723559	0.0108808	6.64985	3.04273e-11	4.03814e-09
GO_INORGANIC_CATION_TRANSMEMBRANE_TRANSPORTER_ACTIVITY	Y	0.13737	431	0.00575443	0.0111486	0.516156	0.605754	0.800896
GO_NAD_BINDING	Y	0.020798	43	-0.0314629	0.0389017	-0.808778	0.418656	0.656633
GO_ANION_TRANSMEMBRANE_TRANSPORTER_ACTIVITY	Y	0.0854823	236	0.00591746	0.0149434	0.395992	0.692117	0.857302
GO_CHAPERONE_BINDING	Y	0.0306404	68	-0.0395804	0.0316858	-1.24915	0.211629	0.451062
GO_PROTEIN_TYROSINE_PHOSPHATASE_ACTIVITY	Y	0.0377033	88	0.0710314	0.0194215	3.65736	0.000255757	0.00416839
GO_IDENTICAL_PROTEIN_BINDING	Y	0.259843	1015	0.0103588	0.00734684	1.40996	0.158573	0.384347
GO_GALACTOSYLTRANSFERASE_ACTIVITY	Y	0.0148596	29	0.0012406	0.0429218	0.0289038	0.976942	0.988614
GO_PHOSPHOTRANSFERASE_ACTIVITY_PHOSPHATE_GROUP_AS_ACCEPTOR	Y	0.0166028	33	-0.0093672	0.0416013	-0.225166	0.821854	0.926209
GO_ALKALI_METAL_ION_BINDING	Y	0.0106352	20	0.085351	0.0380198	2.24491	0.0247897	0.13488
GO_RIBONUCLEOPROTEIN_COMPLEX_BINDING	Y	0.0354737	81	0.0361928	0.0229598	1.57635	0.114967	0.317869
GO_DNA_APURINIC_OR_APYRIMIDINIC_SITE_LYASE_ACTIVITY	Y	0.00639712	11	0.0107626	0.0675871	0.15924	0.873482	0.942468
GO_NEUROPILIN_BINDING	Y	0.00764509	14	0.123411	0.0372519	3.31287	0.00092579	0.0122865
GO_PEPTIDE_ANTIGEN_BINDING	Y	0.00790166	14	0.00430171	0.0611442	0.0703536	0.943913	0.977587
GO_DYNEIN_BINDING	Y	0.0115324	22	0.0889242	0.0373628	2.38002	0.0173251	0.1073
GO_TRANSCRIPTIONAL_REPRESSOR_ACTIVITY_RNA_POLYMERASE_II_TRANSCRIPTION_FACTOR_BINDING	Y	0.0347512	80	0.0764971	0.0201422	3.79785	0.000146571	0.00261855
GO_RAGE_RECEPTOR_BINDING	Y	0.00255995	4	-0.204675	0.178199	-1.14857	0.250752	0.499218
GO_TRANSLATION_FACTOR_ACTIVITY_RNA_BINDING	Y	0.0306423	68	0.0334612	0.0253115	1.32197	0.186199	0.426656
GO_LOW_DENSITY_LIPOPROTEIN_RECEPTOR_ACTIVITY	Y	0.00690501	12	0.00315446	0.0662776	0.0475947	0.96204	0.986463
GO_CGMP_BINDING	Y	0.00738794	13	-0.0509085	0.0748654	-0.680001	0.496515	0.718478
GO_DRUG_BINDING	Y	0.0384637	89	0.00762347	0.0240645	0.316793	0.751406	0.885858
GO_SPECTRIN_BINDING	Y	0.0121526	23	0.028052	0.0441939	0.634748	0.525603	0.741999
GO_O_ACYLTRANSFERASE_ACTIVITY	Y	0.0178763	36	-0.0254569	0.0417827	-0.609269	0.542356	0.751239
GO_TRANSFERASE_ACTIVITY_TRANSFERRING_NITROGENOUS_GROUPS	Y	0.0106497	20	-0.123871	0.0706656	-1.75291	0.0796387	0.257549
GO_TRANSLATION_INITIATION_FACTOR_BINDING	Y	0.0112131	21	0.043237	0.0439545	0.983678	0.325291	0.573425
GO_BILE_ACID_TRANSMEMBRANE_TRANSPORTER_ACTIVITY	Y	0.00639631	11	-0.0157094	0.0734572	-0.213857	0.830661	0.92725
GO_PEPTIDASE_ACTIVATOR_ACTIVITY_INVOLVED_IN_APOPTOTIC_PROCESS	Y	0.00932865	17	-0.0585709	0.0666608	-0.878641	0.379611	0.621973
GO_METAL_CLUSTER_BINDING	Y	0.0222944	47	-0.0862301	0.0454204	-1.89849	0.0576521	0.220407
GO_ENZYME_INHIBITOR_ACTIVITY	Y	0.100192	288	-0.00207762	0.0138891	-0.149586	0.881093	0.944101
GO_OXYGEN_BINDING	Y	0.0121618	23	-0.0175229	0.0511064	-0.342871	0.7317	0.872395
GO_ENDODEOXYRIBONUCLEASE_ACTIVITY	Y	0.0183139	37	-0.00600309	0.0388828	-0.154389	0.877305	0.943306
GO_CARBON_NITROGEN_LIGASE_ACTIVITY_WITH_GLUTAMINE_AS_AMIDO_N_DONOR	Y	0.00482572	8	-0.045762	0.0938157	-0.487787	0.625709	0.811807
GO_OXIDOREDUCTASE_ACTIVITY_ACTING_ON_THE_CH_NH_GROUP_OF_DONORS_NAD_OR_NADP_AS_ACCEPTOR	Y	0.0072476	13	-0.18741	0.110276	-1.69947	0.0892534	0.272148
GO_ORGANIC_ACID_TRANSMEMBRANE_TRANSPORTER_ACTIVITY	Y	0.0496277	121	0.00976109	0.0205238	0.475599	0.634367	0.815114
GO_LONG_CHAIN_FATTY_ACID_COA_LIGASE_ACTIVITY	Y	0.00689798	12	0.028093	0.0611381	0.459501	0.645882	0.824209
GO_DEATH_RECEPTOR_BINDING	Y	0.00887519	16	-0.0171281	0.0611248	-0.280215	0.779317	0.9045
GO_SUPEROXIDE_GENERATING_NADPH_OXIDASE_ACTIVITY	Y	0.00257534	4	0.0975192	0.0798687	1.22099	0.222109	0.461385
GO_INTRAMOLECULAR_OXIDOREDUCTASE_ACTIVITY_TRANSPOSING_S_S_BONDS	Y	0.0102953	19	-0.0361597	0.0593862	-0.608891	0.542607	0.751239
GO_RHO_GUANYL_NUCLEOTIDE_EXCHANGE_FACTOR_ACTIVITY	Y	0.0304639	68	0.0630164	0.0228563	2.75707	0.00583979	0.0507025
GO_BICARBONATE_TRANSMEMBRANE_TRANSPORTER_ACTIVITY	Y	0.00837676	15	-0.0431535	0.0687477	-0.627709	0.530205	0.743942
GO_HORMONE_BINDING	Y	0.0268299	58	0.0194375	0.0286524	0.678389	0.497536	0.718835
GO_INOSITOL_PHOSPHATE_PHOSPHATASE_ACTIVITY	Y	0.00981737	18	0.0368596	0.0483748	0.761958	0.446098	0.680859
GO_3_5_DNA_HELICASE_ACTIVITY	Y	0.0042378	7	-0.147495	0.12733	-1.15836	0.246736	0.495071
GO_FOUR_WAY_JUNCTION_DNA_BINDING	Y	0.00637049	11	0.0543328	0.0587001	0.925599	0.35467	0.602356
GO_ISOPRENOID_BINDING	Y	0.0121523	23	-0.0321467	0.0533514	-0.602547	0.54682	0.754823
GO_PROTEIN_KINASE_A_CATALYTIC_SUBUNIT_BINDING	Y	0.00789585	14	0.02408	0.0572934	0.420293	0.674278	0.845725
GO_INOSITOL_TRISPHOSPHATE_KINASE_ACTIVITY	Y	0.00482996	8	-0.0328627	0.0905728	-0.362832	0.716736	0.867722
GO_MHC_CLASS_I_PROTEIN_BINDING	Y	0.00740105	13	-0.0257739	0.0695461	-0.370602	0.71094	0.867158
GO_ORGANIC_ACID_BINDING	Y	0.0617339	158	-0.0243574	0.0199623	-1.22017	0.22242	0.461385
GO_GABA_RECEPTOR_BINDING	Y	0.00833079	15	0.0674369	0.0472782	1.42638	0.15378	0.377941
GO_CARBOXYLIC_ESTER_HYDROLASE_ACTIVITY	Y	0.0427374	101	-0.00479126	0.0234955	-0.203922	0.838417	0.92725
GO_CARBON_SULFUR_LYASE_ACTIVITY	Y	0.00420408	7	-0.199071	0.140402	-1.41786	0.156254	0.38052
GO_CARGO_RECEPTOR_ACTIVITY	Y	0.0253475	55	-0.115885	0.0433192	-2.67514	0.0074784	0.0627992
GO_LIPASE_ACTIVATOR_ACTIVITY	Y	0.00639267	11	-0.0286444	0.0762145	-0.375839	0.707042	0.866733
GO_SOLUTE_CATION_ANTIPORTER_ACTIVITY	Y	0.0135252	26	0.00220633	0.0451877	0.048826	0.961059	0.986463
GO_GLUCURONOSYLTRANSFERASE_ACTIVITY	Y	0.00934685	17	0.03114	0.0507452	0.613655	0.539453	0.749106
GO_ANNEALING_ACTIVITY	Y	0.00588158	10	0.0198077	0.0687556	0.288089	0.773283	0.90159
GO_ION_GATED_CHANNEL_ACTIVITY	Y	0.0169901	34	-0.0493844	0.046047	-1.07248	0.283523	0.53974
GO_NADH_DEHYDROGENASE_ACTIVITY	Y	0.00765926	14	-0.239867	0.10687	-2.24447	0.0248177	0.13488
GO_HYDROGEN_EXPORTING_ATPASE_ACTIVITY	Y	0.0109419	21	-0.210368	0.0826821	-2.54429	0.0109605	0.0801757
GO_MAP_KINASE_PHOSPHATASE_ACTIVITY	Y	0.00739428	13	-0.040323	0.0723036	-0.55769	0.577065	0.780197
GO_HEPARAN_SULFATE_PROTEOGLYCAN_BINDING	Y	0.0088559	16	0.0416995	0.0506897	0.822643	0.410725	0.650023
GO_ORGANIC_ANION_TRANSMEMBRANE_TRANSPORTER_ACTIVITY	Y	0.0578636	146	0.0239393	0.0178655	1.33997	0.180276	0.41974
GO_WIDE_PORE_CHANNEL_ACTIVITY	Y	0.00982423	18	-0.0342815	0.0605611	-0.566065	0.571359	0.774879
GO_DEOXYRIBONUCLEASE_ACTIVITY	Y	0.0232363	49	-0.034989	0.0369299	-0.947444	0.343429	0.593114
GO_RRNA_BINDING	Y	0.0168488	34	-0.112004	0.0545493	-2.05327	0.0400651	0.180984
GO_OXIDOREDUCTASE_ACTIVITY_ACTING_ON_SINGLE_DONORS_WITH_INCORPORATION_OF_MOLECULAR_OXYGEN	Y	0.01205	23	-0.106488	0.0638728	-1.66719	0.0954989	0.280755
GO_ORGANIC_ACID_SODIUM_SYMPORTER_ACTIVITY	Y	0.0148523	29	0.0188037	0.0405264	0.463986	0.642665	0.821232
GO_CARBOHYDRATE_TRANSPORTER_ACTIVITY	Y	0.0182806	37	0.0346089	0.0339909	1.01818	0.308609	0.55783
GO_VITAMIN_BINDING	Y	0.0293766	65	-0.0745747	0.0356168	-2.09381	0.0362951	0.171158
GO_RAL_GTPASE_BINDING	Y	0.00690407	12	0.0110103	0.0646053	0.170425	0.864679	0.939516
GO_CHEMOKINE_ACTIVITY	Y	0.0138739	27	-0.0878161	0.0572306	-1.53442	0.124948	0.335481
GO_UDP_GLYCOSYLTRANSFERASE_ACTIVITY	Y	0.0451753	108	0.00990759	0.0217029	0.45651	0.64803	0.824685
GO_GLUTATHIONE_TRANSFERASE_ACTIVITY	Y	0.00832194	15	-0.101845	0.0807234	-1.26165	0.207095	0.44823
GO_OXIDOREDUCTASE_ACTIVITY_ACTING_ON_NAD_P_H_OXYGEN_AS_ACCEPTOR	Y	0.00429245	7	0.0303721	0.0792004	0.383484	0.701367	0.864475
GO_SULFOTRANSFERASE_ACTIVITY	Y	0.0195769	40	-0.000465808	0.0367583	-0.0126722	0.98989	0.995246
GO_WNT_ACTIVATED_RECEPTOR_ACTIVITY	Y	0.0107452	20	0.0455351	0.0442565	1.02889	0.303549	0.555469
GO_PHOSPHATIDYLINOSITOL_3_PHOSPHATE_BINDING	Y	0.0139463	27	0.0355385	0.0397361	0.894364	0.371143	0.61408
GO_LYASE_ACTIVITY	Y	0.0573626	145	-0.0555159	0.0227975	-2.43518	0.0148968	0.0981501
GO_CHOLESTEROL_TRANSPORTER_ACTIVITY	Y	0.00535918	9	-0.0291247	0.0845783	-0.344351	0.730587	0.872395
GO_TRANSCRIPTIONAL_ACTIVATOR_ACTIVITY_RNA_POLYMERASE_II_CORE_PROMOTER_PROXIMAL_REGION_SEQUENCE_SPECIFIC_BINDING	Y	0.0763176	209	0.0794016	0.0126033	6.30005	3.0645e-10	2.84692e-08
GO_SINGLE_STRANDED_DNA_DEPENDENT_ATPASE_ACTIVITY	Y	0.00639617	11	0.0153143	0.0665455	0.230133	0.817991	0.925192
GO_N_ACYLTRANSFERASE_ACTIVITY	Y	0.0351245	80	0.0322831	0.0234019	1.3795	0.167761	0.401676
GO_PROTEIN_PHOSPHATASE_1_BINDING	Y	0.0087224	16	0.0965066	0.0410614	2.3503	0.018772	0.11179
GO_CHEMOATTRACTANT_ACTIVITY	Y	0.00983138	18	0.0197437	0.0512749	0.385056	0.700202	0.864475
GO_CORECEPTOR_ACTIVITY	Y	0.0165142	33	0.0566235	0.0333207	1.69935	0.0892757	0.272148
GO_QUATERNARY_AMMONIUM_GROUP_BINDING	Y	0.0187365	38	-0.00582182	0.0383463	-0.151822	0.879329	0.944101
GO_VOLTAGE_GATED_POTASSIUM_CHANNEL_ACTIVITY	Y	0.0343936	78	0.0308241	0.023795	1.2954	0.195204	0.434879
GO_CYCLIN_DEPENDENT_PROTEIN_KINASE_ACTIVITY	Y	0.0144172	28	-0.00377139	0.0443737	-0.0849916	0.932269	0.97343
GO_TRANSMEMBRANE_TRANSPORTER_ACTIVITY	Y	0.218506	798	-0.000946535	0.00847253	-0.111718	0.911049	0.961777
GO_CHEMOKINE_BINDING	Y	0.0079003	14	0.0124951	0.0595421	0.209852	0.833786	0.92725
GO_PEPTIDE_HORMONE_BINDING	Y	0.0165626	33	0.0401275	0.0353507	1.13512	0.256343	0.507766
GO_KINESIN_BINDING	Y	0.0134994	26	0.0358202	0.0403619	0.887477	0.374838	0.617419
GO_PHOSPHATIDYLINOSITOL_3_KINASE_ACTIVITY	Y	0.0287867	63	-0.00395355	0.0296344	-0.133411	0.89387	0.951209
GO_FK506_BINDING	Y	0.00838893	15	-0.0192857	0.0635197	-0.303618	0.761424	0.893524
GO_UBIQUITIN_LIKE_PROTEIN_CONJUGATING_ENZYME_BINDING	Y	0.0153084	31	0.11102	0.0275236	4.03361	5.52171e-05	0.00125114
GO_STEROID_HORMONE_RECEPTOR_BINDING	Y	0.0339135	77	0.0509677	0.0223218	2.28331	0.022427	0.126271
GO_BITTER_TASTE_RECEPTOR_ACTIVITY	Y	0.00188485	3	-0.531312	0.265889	-1.99825	0.0457093	0.194048
GO_PROTEIN_KINASE_C_ACTIVITY	Y	0.00835134	15	0.0565199	0.0492855	1.14679	0.25149	0.499218
GO_AU_RICH_ELEMENT_BINDING	Y	0.0115951	22	0.0739196	0.0385637	1.91682	0.0552811	0.217525
GO_UBIQUITIN_LIKE_PROTEIN_LIGASE_BINDING	Y	0.0847992	234	0.0251665	0.014119	1.78245	0.0746979	0.247837
GO_LIPOPROTEIN_PARTICLE_RECEPTOR_ACTIVITY	Y	0.00839118	15	-0.0111084	0.0619707	-0.179252	0.857743	0.935262
GO_RNA_HELICASE_ACTIVITY	Y	0.0240149	51	-0.0461658	0.0373298	-1.2367	0.216218	0.455768
GO_CYCLIN_DEPENDENT_PROTEIN_SERINE_THREONINE_KINASE_REGULATOR_ACTIVITY	Y	0.0121116	23	0.0530789	0.0404082	1.31357	0.189013	0.428144
GO_CCR_CHEMOKINE_RECEPTOR_BINDING	Y	0.0107357	20	-0.0647787	0.062515	-1.03621	0.300121	0.555404
GO_GABA_RECEPTOR_ACTIVITY	Y	0.0103092	19	0.00530293	0.0523256	0.101345	0.919278	0.966074
GO_DNA_DEPENDENT_ATPASE_ACTIVITY	Y	0.0287862	63	0.00520751	0.0287934	0.180858	0.856482	0.935262
GO_METALLOPEPTIDASE_ACTIVITY	Y	0.0627286	161	-0.0130028	0.0191174	-0.680153	0.496419	0.718478
GO_UBIQUITIN_LIKE_PROTEIN_LIGASE_ACTIVITY	Y	0.0676398	179	0.0691467	0.0138305	4.9996	5.81445e-07	2.16065e-05
GO_OXIDOREDUCTASE_ACTIVITY_ACTING_ON_THE_CH_CH_GROUP_OF_DONORS_NAD_OR_NADP_AS_ACCEPTOR	Y	0.0107696	20	-0.0280563	0.0564434	-0.497069	0.619148	0.810125
GO_GUANYL_NUCLEOTIDE_BINDING	Y	0.108327	318	0.0113807	0.0126998	0.896137	0.370195	0.61408
GO_PHOSPHATIDYLINOSITOL_3_KINASE_BINDING	Y	0.0124175	24	0.0915708	0.0342446	2.67402	0.00750346	0.0627992
GO_ENDONUCLEASE_ACTIVITY	Y	0.0383349	89	-0.0526431	0.0288589	-1.82416	0.0681496	0.235357
GO_TRANSCRIPTIONAL_REPRESSOR_ACTIVITY_RNA_POLYMERASE_II_CORE_PROMOTER_PROXIMAL_REGION_SEQUENCE_SPECIFIC_BINDING	Y	0.0407465	96	0.0531192	0.0200127	2.65428	0.00795679	0.064277
GO_ANION_ANION_ANTIPORTER_ACTIVITY	Y	0.00970438	18	-0.134219	0.0792851	-1.69286	0.0905041	0.272148
GO_TASTE_RECEPTOR_ACTIVITY	Y	0.00469677	8	-0.239331	0.136626	-1.75172	0.079843	0.257549
GO_ORGANIC_CATION_TRANSMEMBRANE_TRANSPORTER_ACTIVITY	Y	0.00668599	12	-0.249212	0.122364	-2.03664	0.041705	0.185378
GO_WATER_TRANSMEMBRANE_TRANSPORTER_ACTIVITY	Y	0.00740129	13	0.0227398	0.0596745	0.381064	0.703161	0.865085
GO_ACTIVIN_BINDING	Y	0.00681149	12	0.0882204	0.0477854	1.84618	0.0648871	0.230048
GO_OXIDOREDUCTASE_ACTIVITY_ACTING_ON_THE_CH_NH2_GROUP_OF_DONORS	Y	0.00886923	16	-0.0307629	0.0636074	-0.483637	0.628651	0.811807
GO_BETA_AMYLOID_BINDING	Y	0.0139614	27	0.0238233	0.0413226	0.57652	0.564273	0.769764
GO_HYDROLASE_ACTIVITY_HYDROLYZING_N_GLYCOSYL_COMPOUNDS	Y	0.0102402	19	-0.0876556	0.0684831	-1.27996	0.200581	0.440519
GO_PROTEIN_HORMONE_RECEPTOR_ACTIVITY	Y	0.00586454	10	-0.0617743	0.0873797	-0.706964	0.4796	0.711739
GO_CHEMOKINE_RECEPTOR_BINDING	Y	0.0178682	36	-0.0324949	0.0426687	-0.761564	0.446333	0.680859
GO_PROLINE_RICH_REGION_BINDING	Y	0.0102321	19	0.0672773	0.0426333	1.57805	0.114578	0.317739
GO_VOLTAGE_GATED_SODIUM_CHANNEL_ACTIVITY	Y	0.0096297	18	0.103103	0.0376842	2.73597	0.00622749	0.053568
GO_OXIDOREDUCTASE_ACTIVITY_ACTING_ON_PAIRED_DONORS_WITH_INCORPORATION_OR_REDUCTION_OF_MOLECULAR_OXYGEN	Y	0.0458492	110	0.0180298	0.0209624	0.860105	0.389746	0.63079
GO_TRANSCRIPTION_FACTOR_ACTIVITY_PROTEIN_BINDING	Y	0.156359	514	0.0476963	0.00905329	5.2684	1.39657e-07	7.05068e-06
GO_INTRAMOLECULAR_TRANSFERASE_ACTIVITY_PHOSPHOTRANSFERASES	Y	0.00480026	8	0.0690373	0.0653734	1.05604	0.290966	0.548339
GO_SINGLE_STRANDED_DNA_BINDING	Y	0.0307005	68	-0.000264216	0.0282027	-0.00936846	0.992525	0.996817
GO_TYPE_I_INTERFERON_RECEPTOR_BINDING	Y	0.00140663	2	-0.00536518	0.166711	-0.0321826	0.974327	0.988155
GO_RIBONUCLEOTIDE_BINDING	Y	0.347757	1551	0.0150194	0.00602003	2.4949	0.0126107	0.0874282
GO_TRANSCRIPTION_COACTIVATOR_BINDING	Y	0.00496061	9	0.170125	0.0383366	4.43765	9.1639e-06	0.000236479
GO_PROTEIN_PHOSPHATASE_TYPE_2A_REGULATOR_ACTIVITY	Y	0.0107292	20	0.0542089	0.043002	1.26061	0.207469	0.44823
GO_RETINOIC_ACID_RECEPTOR_BINDING	Y	0.013787	27	0.0838926	0.0335668	2.49927	0.0124563	0.0870065
GO_PHOSPHATIDYLINOSITOL_PHOSPHATE_KINASE_ACTIVITY	Y	0.00836443	15	0.0476295	0.0508257	0.937115	0.348715	0.596605
GO_ACTIVATING_TRANSCRIPTION_FACTOR_BINDING	Y	0.0242999	52	0.0619988	0.0260464	2.38032	0.017311	0.1073
GO_NEUREXIN_FAMILY_PROTEIN_BINDING	Y	0.00680206	12	0.0917279	0.0487734	1.8807	0.0600341	0.223977
GO_MICROTUBULE_BINDING	Y	0.0679264	178	0.0345585	0.0156856	2.2032	0.0275971	0.144846
GO_TUBULIN_BINDING	Y	0.0862344	239	0.0265449	0.0139288	1.90575	0.0567025	0.218575
GO_ORGANOPHOSPHATE_ESTER_TRANSMEMBRANE_TRANSPORTER_ACTIVITY	Y	0.010775	20	-0.0177178	0.0547601	-0.323553	0.746282	0.881998
GO_TRANSMEMBRANE_RECEPTOR_PROTEIN_PHOSPHATASE_ACTIVITY	Y	0.00870047	16	0.101701	0.0388762	2.61602	0.00890563	0.0695238
GO_NADP_BINDING	Y	0.0169936	34	-0.0472529	0.0456931	-1.03414	0.301091	0.555469
GO_S_ADENOSYLMETHIONINE_DEPENDENT_METHYLTRANSFERASE_ACTIVITY	Y	0.047224	114	0.0182687	0.020569	0.88817	0.374465	0.617419
GO_KINASE_ACTIVATOR_ACTIVITY	Y	0.0238787	51	0.0657241	0.0260093	2.52695	0.0115168	0.082939
GO_SIALYLTRANSFERASE_ACTIVITY	Y	0.0109826	21	0.106557	0.0334849	3.18225	0.00146454	0.0172223
GO_HISTONE_LYSINE_N_METHYLTRANSFERASE_ACTIVITY	Y	0.0197547	41	0.0784346	0.027451	2.85725	0.00427953	0.0410609
GO_INSULIN_LIKE_GROWTH_FACTOR_RECEPTOR_BINDING	Y	0.00775592	14	0.0991656	0.0439858	2.25449	0.0241807	0.134514
GO_MOTOR_ACTIVITY	Y	0.0447027	107	-0.0476792	0.0258806	-1.84228	0.0654557	0.230144
GO_TRANSCRIPTION_FACTOR_BINDING	Y	0.14071	448	0.0486905	0.0096278	5.05728	4.3065e-07	1.81852e-05
GO_TRNA_SPECIFIC_RIBONUCLEASE_ACTIVITY	Y	0.00626224	11	-0.188879	0.108597	-1.73927	0.0820096	0.259139
GO_SOLUTE_CATION_SYMPORTER_ACTIVITY	Y	0.0387692	90	0.029401	0.0222728	1.32004	0.186844	0.426656
GO_UBIQUITIN_SPECIFIC_PROTEASE_BINDING	Y	0.00535841	9	-0.031647	0.0851347	-0.371729	0.7101	0.867158
GO_PHOSPHOLIPID_TRANSPORTER_ACTIVITY	Y	0.0178544	36	0.035835	0.0342953	1.0449	0.296089	0.552342
GO_RETINOID_X_RECEPTOR_BINDING	Y	0.00874678	16	0.0901029	0.0415076	2.17076	0.0299661	0.152123
GO_MONOCARBOXYLIC_ACID_TRANSMEMBRANE_TRANSPORTER_ACTIVITY	Y	0.0178875	36	-0.0109838	0.0400257	-0.274419	0.783767	0.906749
GO_ANION_TRANSMEMBRANE_TRANSPORTING_ATPASE_ACTIVITY	Y	0.00428876	7	0.0393963	0.0765217	0.514837	0.606675	0.800896
GO_POTASSIUM_ION_BINDING	Y	0.00781588	14	0.0799457	0.0463308	1.72554	0.0844521	0.262824
GO_BASAL_TRANSCRIPTION_MACHINERY_BINDING	Y	0.0125634	24	0.0538594	0.0397704	1.35426	0.175676	0.411603
GO_INTRACELLULAR_LIGAND_GATED_ION_CHANNEL_ACTIVITY	Y	0.013027	25	-0.0607056	0.0553234	-1.09729	0.272536	0.528302
GO_LIGASE_ACTIVITY_FORMING_CARBON_NITROGEN_BONDS	Y	0.0214057	45	-0.109962	0.0473006	-2.32474	0.0201	0.116706
GO_1_PHOSPHATIDYLINOSITOL_BINDING	Y	0.00975861	18	0.0689793	0.0424207	1.62608	0.103956	0.296243
GO_OXIDOREDUCTASE_ACTIVITY_ACTING_ON_PEROXIDE_AS_ACCEPTOR	Y	0.0137181	27	-0.157813	0.0674866	-2.33843	0.0193788	0.113226
GO_GROWTH_FACTOR_RECEPTOR_BINDING	Y	0.0468109	113	0.0335763	0.0196487	1.70883	0.0875044	0.270072
GO_PHOSPHOLIPASE_A2_ACTIVITY	Y	0.0130749	25	0.00336665	0.0459133	0.0733264	0.941547	0.977269
GO_TITIN_BINDING	Y	0.00534872	9	-0.0558673	0.0925345	-0.603745	0.546023	0.754823
GO_NUCLEOBASE_CONTAINING_COMPOUND_TRANSMEMBRANE_TRANSPORTER_ACTIVITY	Y	0.0139618	27	0.0234294	0.0413505	0.566605	0.570992	0.774879
GO_GTPASE_ACTIVATING_PROTEIN_BINDING	Y	0.00790178	14	-0.0023184	0.0624374	-0.0371316	0.970381	0.988155
GO_OXIDOREDUCTASE_ACTIVITY_ACTING_ON_THE_CH_NH2_GROUP_OF_DONORS_OXYGEN_AS_ACCEPTOR	Y	0.00789542	14	-0.027804	0.0674175	-0.412415	0.680041	0.847998
GO_LIGAND_DEPENDENT_NUCLEAR_RECEPTOR_TRANSCRIPTION_COACTIVATOR_ACTIVITY	Y	0.0212194	44	0.0219207	0.0325901	0.672617	0.501202	0.720769
GO_HSP70_PROTEIN_BINDING	Y	0.0134788	26	-0.05821	0.0550026	-1.05831	0.289932	0.548339
GO_SNRNA_BINDING	Y	0.013525	26	-0.00439835	0.0461354	-0.0953357	0.92405	0.969991
GO_ENZYME_REGULATOR_ACTIVITY	Y	0.214166	779	0.0306902	0.00784437	3.91238	9.18209e-05	0.0018019
GO_ARF_GUANYL_NUCLEOTIDE_EXCHANGE_FACTOR_ACTIVITY	Y	0.0123825	24	0.0975864	0.0331253	2.94598	0.00322467	0.0329199
GO_CARBONATE_DEHYDRATASE_ACTIVITY	Y	0.00737914	13	-0.0634229	0.0769245	-0.824482	0.40968	0.649875
GO_RECEPTOR_SIGNALING_COMPLEX_SCAFFOLD_ACTIVITY	Y	0.0112403	21	0.016982	0.047911	0.354449	0.723007	0.870412
GO_GLYCOPROTEIN_BINDING	Y	0.0385586	90	0.0590292	0.0201969	2.92268	0.00347587	0.0347214
GO_MYOSIN_V_BINDING	Y	0.00881077	16	0.0681662	0.0454054	1.50128	0.133306	0.350766
GO_EXOPEPTIDASE_ACTIVITY	Y	0.0377077	87	-0.0266826	0.0270102	-0.987871	0.323233	0.571712
GO_NUCLEOTIDE_TRANSMEMBRANE_TRANSPORTER_ACTIVITY	Y	0.00887671	16	0.0111412	0.0559403	0.199162	0.842139	0.928051
GO_FUCOSYLTRANSFERASE_ACTIVITY	Y	0.00587962	10	-0.0284946	0.0799511	-0.356401	0.721546	0.870412
GO_SOLUTE_PROTON_SYMPORTER_ACTIVITY	Y	0.0126153	24	0.0198466	0.0443807	0.447191	0.654744	0.83209
GO_PLATELET_DERIVED_GROWTH_FACTOR_BINDING	Y	0.00638465	11	0.0392144	0.0613612	0.639075	0.522785	0.741999
GO_PHOSPHOTRANSFERASE_ACTIVITY_NITROGENOUS_GROUP_AS_ACCEPTOR	Y	0.00587694	10	-0.0361138	0.0816308	-0.442404	0.658204	0.835344
GO_SNARE_BINDING	Y	0.0465583	112	0.00873341	0.0213963	0.408174	0.683152	0.849581
GO_GTP_RHO_BINDING	Y	0.00887361	16	0.0197034	0.0544263	0.362021	0.717342	0.867722
GO_DELAYED_RECTIFIER_POTASSIUM_CHANNEL_ACTIVITY	Y	0.0160742	32	0.0593499	0.0333692	1.77858	0.0753298	0.24804
GO_NAD_DEPENDENT_PROTEIN_DEACETYLASE_ACTIVITY	Y	0.00887646	16	-0.0127629	0.0603314	-0.211546	0.832464	0.92725
GO_PHOSPHATIDIC_ACID_BINDING	Y	0.00740553	13	0.00868676	0.0625533	0.13887	0.889555	0.948791
GO_DICARBOXYLIC_ACID_TRANSMEMBRANE_TRANSPORTER_ACTIVITY	Y	0.0144049	28	-0.0275337	0.0476567	-0.57775	0.563442	0.769761
GO_TRANSLATION_REGULATOR_ACTIVITY	Y	0.0127807	25	0.104217	0.0321574	3.24083	0.0011946	0.0147971
GO_ACETYLGLUCOSAMINYLTRANSFERASE_ACTIVITY	Y	0.0208123	43	-0.02011	0.0376454	-0.534196	0.593214	0.791805
GO_INTRAMOLECULAR_OXIDOREDUCTASE_ACTIVITY_TRANSPOSING_C_C_BONDS	Y	0.00581156	10	-0.133596	0.102509	-1.30326	0.192508	0.43198
GO_NF_KAPPAB_BINDING	Y	0.0130662	25	0.0220959	0.0431878	0.511625	0.608922	0.802395
GO_SODIUM_INDEPENDENT_ORGANIC_ANION_TRANSMEMBRANE_TRANSPORTER_ACTIVITY	Y	0.00729615	13	0.0912171	0.0464235	1.96489	0.0494467	0.205072
GO_BIOACTIVE_LIPID_RECEPTOR_ACTIVITY	Y	0.00639438	11	0.0212719	0.0651777	0.326368	0.744151	0.881797
GO_STORE_OPERATED_CALCIUM_CHANNEL_ACTIVITY	Y	0.00480574	8	-0.0877293	0.103247	-0.849699	0.395507	0.633755
GO_CALCIUM_DEPENDENT_PROTEIN_KINASE_ACTIVITY	Y	0.00565452	10	0.13414	0.0475651	2.82012	0.00480724	0.0442171
GO_MACROMOLECULE_TRANSMEMBRANE_TRANSPORTER_ACTIVITY	Y	0.0102744	19	-0.0593631	0.0633432	-0.937166	0.348689	0.596605
GO_PEPTIDASE_INHIBITOR_ACTIVITY	Y	0.0486048	118	-0.0130504	0.022307	-0.585036	0.558533	0.76521
GO_RAC_GTPASE_BINDING	Y	0.0169445	34	0.0559822	0.033071	1.69279	0.0905183	0.272148
GO_SULFURIC_ESTER_HYDROLASE_ACTIVITY	Y	0.00690054	12	0.0227529	0.062107	0.366349	0.71411	0.867443
GO_SECONDARY_ACTIVE_TRANSMEMBRANE_TRANSPORTER_ACTIVITY	Y	0.0738044	197	0.0282127	0.0152113	1.85472	0.0636572	0.228128
GO_PEPTIDOGLYCAN_BINDING	Y	0.00427038	7	-0.0904731	0.111836	-0.808982	0.418539	0.656633
GO_DRUG_TRANSPORTER_ACTIVITY	Y	0.007892	14	-0.0349134	0.0687355	-0.507939	0.611504	0.804339
GO_HYALURONIC_ACID_BINDING	Y	0.00980769	18	-0.0546816	0.0640689	-0.853481	0.393407	0.633755
GO_ENZYME_BINDING	Y	0.339955	1510	0.0428365	0.00573171	7.47359	8.26518e-14	3.83918e-11
GO_TRANSLATION_REPRESSOR_ACTIVITY	Y	0.00896533	17	0.134743	0.034205	3.93929	8.21203e-05	0.00170654
GO_DNA_DIRECTED_DNA_POLYMERASE_ACTIVITY	Y	0.0103096	19	-7.0682e-05	0.0532284	-0.0013279	0.998941	0.999937
GO_COFACTOR_BINDING	Y	0.0789803	215	-0.0548674	0.0186462	-2.94256	0.00326046	0.0329235
GO_RNA_POLYMERASE_II_ACTIVATING_TRANSCRIPTION_FACTOR_BINDING	Y	0.0155671	31	0.0762971	0.0319976	2.38446	0.0171174	0.1073
GO_RNA_POLYMERASE_II_TRANSCRIPTION_COACTIVATOR_ACTIVITY	Y	0.0158809	32	0.0940543	0.0290821	3.2341	0.00122311	0.0149041
GO_PEROXISOME_PROLIFERATOR_ACTIVATED_RECEPTOR_BINDING	Y	0.00735288	13	0.0674138	0.0505801	1.33281	0.182615	0.424122
GO_K63_LINKED_POLYUBIQUITIN_BINDING	Y	0.00838601	15	-0.0266533	0.0648702	-0.41087	0.681174	0.848271
GO_OXIDOREDUCTASE_ACTIVITY_ACTING_ON_CH_OH_GROUP_OF_DONORS	Y	0.0424581	101	-0.0749806	0.0284852	-2.63227	0.00849106	0.0668491
GO_CULLIN_FAMILY_PROTEIN_BINDING	Y	0.00586121	10	0.0525478	0.0614059	0.855745	0.392154	0.633584
GO_PROTEIN_TYROSINE_KINASE_BINDING	Y	0.0210309	44	0.0711762	0.0273881	2.5988	0.00936475	0.0714116
GO_INSULIN_RECEPTOR_SUBSTRATE_BINDING	Y	0.00634681	11	0.0711378	0.0550556	1.29211	0.196341	0.436365
GO_MONOVALENT_CATION_PROTON_ANTIPORTER_ACTIVITY	Y	0.00684539	12	-0.105479	0.0888931	-1.18659	0.235411	0.479598
GO_ZINC_ION_BINDING	Y	0.248012	957	0.0420309	0.00694547	6.05155	1.47115e-09	1.24245e-07
GO_TETRAPYRROLE_BINDING	Y	0.037375	86	-0.0111461	0.0259531	-0.429469	0.667588	0.840728
GO_3_5_EXONUCLEASE_ACTIVITY	Y	0.0199878	41	0.0145445	0.0346395	0.419883	0.674578	0.845725
GO_MITOGEN_ACTIVATED_PROTEIN_KINASE_KINASE_KINASE_BINDING	Y	0.009621	18	0.104789	0.0369711	2.83435	0.00459849	0.0427199
GO_PDZ_DOMAIN_BINDING	Y	0.0337512	77	0.068793	0.0209928	3.27698	0.00105177	0.0133849
GO_POLY_A_RNA_BINDING	Y	0.243009	925	0.0184862	0.00749975	2.46492	0.0137165	0.0930116
GO_POTASSIUM_CHANNEL_REGULATOR_ACTIVITY	Y	0.0195582	40	0.0251342	0.0337993	0.743631	0.457112	0.690499
GO_EXTRACELLULAR_LIGAND_GATED_ION_CHANNEL_ACTIVITY	Y	0.0276243	60	-0.00642554	0.0305964	-0.21001	0.833663	0.92725
GO_G_PROTEIN_COUPLED_AMINE_RECEPTOR_ACTIVITY	Y	0.0152461	30	-0.0580034	0.0503047	-1.15304	0.248914	0.498364
GO_CXCR_CHEMOKINE_RECEPTOR_BINDING	Y	0.00637023	11	0.0545539	0.0579359	0.941625	0.346401	0.596605
GO_IRON_ION_BINDING	Y	0.0469035	113	-0.00785863	0.0224344	-0.350293	0.726124	0.870412
GO_STEROID_HYDROXYLASE_ACTIVITY	Y	0.00877835	16	0.0804717	0.0447183	1.79953	0.0719572	0.242229
GO_SIGNALING_ADAPTOR_ACTIVITY	Y	0.0290047	64	0.0556019	0.0240663	2.31037	0.0208823	0.120495
GO_G_PROTEIN_BETA_GAMMA_SUBUNIT_COMPLEX_BINDING	Y	0.00887798	16	-0.00336631	0.0586016	-0.057444	0.954192	0.982755
GO_DOPAMINE_BINDING	Y	0.00371549	6	-0.114149	0.129643	-0.880489	0.37861	0.621973
GO_SH3_SH2_ADAPTOR_ACTIVITY	Y	0.0216054	45	0.0338998	0.0309334	1.0959	0.273142	0.528302
GO_RETINOL_BINDING	Y	0.00584958	10	-0.0852878	0.0944357	-0.903131	0.366472	0.612937
GO_INORGANIC_ANION_EXCHANGER_ACTIVITY	Y	0.00730265	13	0.0889911	0.0476927	1.86593	0.0620725	0.224659
GO_RETINOL_DEHYDROGENASE_ACTIVITY	Y	0.00836437	15	-0.0596151	0.0711852	-0.837465	0.402346	0.643338
GO_PHOSPHOLIPASE_C_ACTIVITY	Y	0.0143304	28	-0.0798594	0.0561106	-1.42325	0.154686	0.379164
GO_NUCLEOSOMAL_DNA_BINDING	Y	0.013925	27	-0.057849	0.0534722	-1.08185	0.279338	0.53396
GO_LIPASE_ACTIVITY	Y	0.0409114	96	-0.0331361	0.0262809	-1.26085	0.207385	0.44823
GO_PROTEIN_BINDING_INVOLVED_IN_CELL_CELL_ADHESION	Y	0.00588423	10	0.00521125	0.0721212	0.0722569	0.942399	0.977269
GO_PHOSPHATIDYLINOSITOL_3_4_BISPHOSPHATE_BINDING	Y	0.00924536	17	0.0829535	0.0414613	2.00074	0.0454392	0.194048
GO_ACTIN_DEPENDENT_ATPASE_ACTIVITY	Y	0.00587319	10	-0.0449938	0.0839109	-0.536209	0.591823	0.791084
GO_PROTEIN_SERINE_THREONINE_KINASE_ACTIVITY	Y	0.125834	390	0.0631354	0.00982774	6.42421	1.36839e-10	1.41248e-08
GO_NUCLEOTIDE_RECEPTOR_ACTIVITY	Y	0.00932604	17	-0.0613183	0.0670672	-0.914281	0.360585	0.606854
GO_METHYL_CPG_BINDING	Y	0.00834413	15	0.0606757	0.0492213	1.23271	0.217704	0.455768
GO_TRANSLATION_REGULATOR_ACTIVITY_NUCLEIC_ACID_BINDING	Y	0.00665126	12	0.130127	0.0420542	3.09426	0.00197692	0.0218638
GO_RECEPTOR_ACTIVITY	Y	0.251257	968	0.00548568	0.00760759	0.72108	0.470872	0.704097
GO_ACTIN_MONOMER_BINDING	Y	0.0093593	17	0.0025225	0.0558082	0.0451994	0.963949	0.986657
GO_REPRESSING_TRANSCRIPTION_FACTOR_BINDING	Y	0.0222776	47	0.0661312	0.0270415	2.44555	0.0144756	0.0967467
GO_POLYOL_TRANSMEMBRANE_TRANSPORTER_ACTIVITY	Y	0.00737394	13	0.054153	0.0531892	1.01812	0.308638	0.55783
GO_CHROMATIN_BINDING	Y	0.127366	393	0.0418955	0.0104339	4.01532	5.96753e-05	0.00131996
GO_MYOSIN_BINDING	Y	0.0248614	53	0.017603	0.0301464	0.583915	0.559287	0.76521
GO_HYDROLASE_ACTIVITY_ACTING_ON_CARBON_NITROGEN_BUT_NOT_PEPTIDE_BONDS_IN_LINEAR_AMIDES	Y	0.0322106	72	0.00526886	0.0269391	0.195584	0.844939	0.928933
GO_CHEMOREPELLENT_ACTIVITY	Y	0.0123267	24	0.106027	0.032068	3.30631	0.000947705	0.0124003
GO_MAP_KINASE_KINASE_ACTIVITY	Y	0.00631807	11	0.0856959	0.050572	1.69453	0.0901867	0.272148
GO_ANTIGEN_BINDING	Y	0.0208008	43	-0.0295396	0.0387151	-0.762999	0.445477	0.680859
GO_PROTEIN_DOMAIN_SPECIFIC_BINDING	Y	0.16101	533	0.0405902	0.00908686	4.46691	7.99805e-06	0.000212291
GO_SODIUM_CHANNEL_REGULATOR_ACTIVITY	Y	0.0148158	29	0.043408	0.0373747	1.16143	0.245488	0.493632
GO_POLY_A_SPECIFIC_RIBONUCLEASE_ACTIVITY	Y	0.00680073	12	0.0922036	0.0491183	1.87718	0.0605148	0.223977
GO_OXIDOREDUCTASE_ACTIVITY_ACTING_ON_THE_ALDEHYDE_OR_OXO_GROUP_OF_DONORS	Y	0.0177397	36	-0.095098	0.050362	-1.88829	0.0590076	0.222974
GO_DOUBLE_STRANDED_RNA_BINDING	Y	0.0271515	59	0.0424799	0.0263117	1.61449	0.106444	0.300975
GO_MHC_PROTEIN_BINDING	Y	0.0103071	19	-0.0144147	0.0556312	-0.259112	0.795553	0.912431
GO_POTASSIUM_CHANNEL_ACTIVITY	Y	0.0434303	103	0.0119941	0.0220705	0.543445	0.586832	0.787649
GO_FATTY_ACID_LIGASE_ACTIVITY	Y	0.00839142	15	-0.00986722	0.0617677	-0.159747	0.873083	0.942468
GO_APOLIPOPROTEIN_BINDING	Y	0.00680972	12	0.0888951	0.047607	1.86727	0.0618847	0.224659
GO_LIPID_BINDING	Y	0.158363	519	0.0136192	0.00996001	1.36739	0.171524	0.407534
GO_HISTONE_ACETYLTRANSFERASE_BINDING	Y	0.0140514	28	0.108607	0.0305946	3.54986	0.000386703	0.00598745
GO_STRUCTURAL_CONSTITUENT_OF_CYTOSKELETON	Y	0.034808	79	0.0141622	0.0250107	0.566245	0.571236	0.774879
GO_NUCLEOSIDE_TRANSMEMBRANE_TRANSPORTER_ACTIVITY	Y	0.00689787	12	-0.0321309	0.0738124	-0.435305	0.663348	0.839648
GO_IGG_BINDING	Y	0.00425176	7	-0.124485	0.121038	-1.02847	0.303744	0.555469
GO_2_IRON_2_SULFUR_CLUSTER_BINDING	Y	0.00991222	19	-0.275766	0.0985467	-2.79832	0.00514387	0.045511
GO_ALPHA_ACTININ_BINDING	Y	0.0107293	20	0.0541654	0.0434625	1.24626	0.212691	0.451062
GO_OXIDOREDUCTASE_ACTIVITY_ACTING_ON_A_SULFUR_GROUP_OF_DONORS	Y	0.0198158	41	-0.0972728	0.0473247	-2.05544	0.0398555	0.180984
GO_DEACETYLASE_ACTIVITY	Y	0.0235281	50	0.0582041	0.0269982	2.15585	0.0311127	0.155396
GO_TUMOR_NECROSIS_FACTOR_RECEPTOR_BINDING	Y	0.0144159	28	0.00892919	0.0426166	0.209524	0.834043	0.92725
GO_FLAVIN_ADENINE_DINUCLEOTIDE_BINDING	Y	0.0297092	66	-0.0852702	0.0362756	-2.35062	0.0187559	0.11179
GO_TRANSFERASE_ACTIVITY_TRANSFERRING_ONE_CARBON_GROUPS	Y	0.0668369	174	-0.00667469	0.0180485	-0.36982	0.711522	0.867158
GO_PROTEIN_N_TERMINUS_BINDING	Y	0.0376956	87	0.0274832	0.0228116	1.20479	0.228304	0.468959
GO_ANGIOTENSIN_RECEPTOR_BINDING	Y	0.00690506	12	0.00185956	0.0665523	0.0279413	0.977709	0.988614
GO_INWARD_RECTIFIER_POTASSIUM_CHANNEL_ACTIVITY	Y	0.0107782	20	0.00729615	0.0506783	0.14397	0.885526	0.947758
GO_GLUCOSYLTRANSFERASE_ACTIVITY	Y	0.00788337	14	-0.0491604	0.0712974	-0.689512	0.490513	0.715382
GO_RIBONUCLEASE_P_ACTIVITY	Y	0.0042416	7	-0.141368	0.124739	-1.13331	0.257103	0.50819
GO_P53_BINDING	Y	0.0256127	55	0.0354374	0.0278648	1.27176	0.20348	0.445832
GO_PROTON_TRANSPORTING_ATP_SYNTHASE_ACTIVITY_ROTATIONAL_MECHANISM	Y	0.00303621	5	-0.373055	0.191959	-1.94341	0.051987	0.211824
GO_PEPTIDE_RECEPTOR_ACTIVITY	Y	0.0422363	100	-0.0530582	0.0270643	-1.96045	0.0499632	0.206292
GO_SYMPORTER_ACTIVITY	Y	0.0518699	128	0.0351548	0.0183562	1.91515	0.0554935	0.217525
GO_FRIZZLED_BINDING	Y	0.0170274	34	0.0179036	0.0375615	0.476647	0.633621	0.815114
GO_RNA_POLYMERASE_II_TRANSCRIPTION_COFACTOR_ACTIVITY	Y	0.0359449	83	0.0680135	0.0202731	3.35486	0.000796161	0.010877
GO_RNA_POLYMERASE_II_CARBOXY_TERMINAL_DOMAIN_KINASE_ACTIVITY	Y	0.00829705	15	0.0810998	0.0443292	1.82949	0.0673478	0.234223
GO_ENDORIBONUCLEASE_ACTIVITY	Y	0.0190324	39	-0.0815056	0.0471666	-1.72804	0.0840039	0.262824
GO_SULFATE_TRANSMEMBRANE_TRANSPORTER_ACTIVITY	Y	0.00467189	8	-0.270457	0.146911	-1.84095	0.0656494	0.230144
GO_NEUROTROPHIN_RECEPTOR_BINDING	Y	0.00737824	13	0.0508198	0.0547746	0.927799	0.353528	0.602356
GO_UBIQUITIN_LIKE_PROTEIN_SPECIFIC_PROTEASE_ACTIVITY	Y	0.0353706	81	0.0523993	0.0216559	2.41963	0.0155489	0.100312
GO_PHOSPHOLIPID_BINDING	Y	0.105274	307	0.0227864	0.0124651	1.82801	0.0675691	0.234223
GO_C_ACYLTRANSFERASE_ACTIVITY	Y	0.00737178	13	-0.0727397	0.0784874	-0.926769	0.354063	0.602356
GO_INTRAMOLECULAR_OXIDOREDUCTASE_ACTIVITY	Y	0.021023	44	-0.103488	0.0466648	-2.21768	0.0265924	0.141168
GO_G_PROTEIN_COUPLED_CHEMOATTRACTANT_RECEPTOR_ACTIVITY	Y	0.0101451	19	-0.149204	0.076496	-1.95048	0.0511387	0.210097
GO_SEQUENCE_SPECIFIC_DNA_BINDING	Y	0.22218	825	0.0521709	0.00724407	7.20187	6.24199e-13	1.15976e-10
GO_GTP_DEPENDENT_PROTEIN_BINDING	Y	0.00789334	14	0.028418	0.0564552	0.503373	0.61471	0.805452
GO_TRANSCRIPTION_COREPRESSOR_ACTIVITY	Y	0.0703921	188	0.0686579	0.0136304	5.03712	4.78459e-07	1.93256e-05
GO_DEATH_RECEPTOR_ACTIVITY	Y	0.00838929	15	0.0168991	0.0567155	0.297962	0.765736	0.897061
GO_RIBONUCLEASE_ACTIVITY	Y	0.0328419	74	-0.0551411	0.03197	-1.72477	0.0845904	0.262824
GO_MISFOLDED_PROTEIN_BINDING	Y	0.00639076	11	-0.0337285	0.0777183	-0.433984	0.664307	0.839648
GO_LAMININ_BINDING	Y	0.0130481	25	0.0371956	0.0410257	0.906641	0.364612	0.611417
GO_GLUTAMATE_RECEPTOR_BINDING	Y	0.0164653	33	0.0683358	0.0317395	2.15302	0.0313344	0.155667
GO_CYTOKINE_RECEPTOR_ACTIVITY	Y	0.0314214	70	-0.0299859	0.0303836	-0.98691	0.323704	0.571712
GO_ACID_PHOSPHATASE_ACTIVITY	Y	0.00588001	10	-0.0272496	0.0797138	-0.341844	0.732474	0.872395
GO_ENDOPEPTIDASE_ACTIVITY	Y	0.106229	311	-0.037102	0.0148084	-2.50547	0.0122402	0.0861453
GO_OXIDOREDUCTASE_ACTIVITY_ACTING_ON_PAIRED_DONORS_WITH_INCORPORATION_OR_REDUCTION_OF_MOLECULAR_OXYGEN_REDUCED_FLAVIN_OR_FLAVOPROTEIN_AS_ONE_DONOR_AND_INCORPORATION_OF_ONE_ATOM_OF_OXYGEN	Y	0.00630015	11	0.0930442	0.0511009	1.82079	0.0686596	0.23624
GO_ARYLSULFATASE_ACTIVITY	Y	0.00483498	8	0.00123951	0.0816587	0.0151791	0.98789	0.995246
GO_NOTCH_BINDING	Y	0.00832831	15	0.0685847	0.0475388	1.44271	0.149124	0.36943
GO_CATION_AMINO_ACID_SYMPORTER_ACTIVITY	Y	0.00827997	15	0.0868032	0.0429366	2.02166	0.0432304	0.188549
GO_DEAMINASE_ACTIVITY	Y	0.0126101	24	0.0259293	0.0435245	0.595739	0.551359	0.756592
GO_THYROID_HORMONE_RECEPTOR_BINDING	Y	0.0130748	25	0.00473476	0.0457117	0.103579	0.917505	0.965303
GO_RECEPTOR_SIGNALING_PROTEIN_ACTIVITY	Y	0.0622664	161	0.0591905	0.015142	3.90904	9.31016e-05	0.0018019
GO_METALLOAMINOPEPTIDASE_ACTIVITY	Y	0.00688641	12	0.0439225	0.0575531	0.763165	0.445378	0.680859
GO_GAP_JUNCTION_CHANNEL_ACTIVITY	Y	0.00639796	11	-0.00229066	0.0704263	-0.0325256	0.974053	0.988155
GO_DOPAMINE_RECEPTOR_BINDING	Y	0.00887543	16	-0.0163978	0.060958	-0.269001	0.787933	0.908176
GO_SIGNALING_PATTERN_RECOGNITION_RECEPTOR_ACTIVITY	Y	0.00636179	11	-0.0825079	0.0885018	-0.932274	0.351211	0.59977
GO_NEUROPEPTIDE_BINDING	Y	0.00736361	13	-0.0822911	0.0799141	-1.02974	0.303148	0.555469
GO_HIGH_VOLTAGE_GATED_CALCIUM_CHANNEL_ACTIVITY	Y	0.00531729	9	0.0742706	0.0594722	1.24883	0.211748	0.451062
GO_GAMMA_CATENIN_BINDING	Y	0.00673343	12	0.112228	0.043353	2.58871	0.00964345	0.0728355
GO_CALCIUM_DEPENDENT_CYSTEINE_TYPE_ENDOPEPTIDASE_ACTIVITY	Y	0.00979198	18	-0.0699094	0.0665481	-1.05051	0.293503	0.549306
GO_TBP_CLASS_PROTEIN_BINDING	Y	0.00838738	15	-0.0234509	0.0642791	-0.36483	0.715244	0.867443
GO_OXIDOREDUCTASE_ACTIVITY_ACTING_ON_NAD_P_H_QUINONE_OR_SIMILAR_COMPOUND_AS_ACCEPTOR	Y	0.0101654	19	-0.137087	0.0762512	-1.79783	0.0722255	0.242229
GO_TAU_PROTEIN_KINASE_ACTIVITY	Y	0.00424934	7	0.0836461	0.0639876	1.30722	0.191158	0.429991
GO_TRANSCRIPTION_FACTOR_ACTIVITY_RNA_POLYMERASE_II_CORE_PROMOTER_SEQUENCE_SPECIFIC	Y	0.0078414	14	0.0689062	0.0482655	1.42765	0.153415	0.377941
GO_RIBOSOME_BINDING	Y	0.0181207	37	0.0749691	0.0294364	2.54681	0.0108817	0.0801757
GO_TRANSCRIPTION_COACTIVATOR_ACTIVITY	Y	0.0930074	263	0.0326393	0.0130229	2.5063	0.0122115	0.0861453
GO_RECEPTOR_REGULATOR_ACTIVITY	Y	0.0191389	39	-0.0288512	0.0405359	-0.711744	0.476635	0.70847
GO_LYSINE_N_METHYLTRANSFERASE_ACTIVITY	Y	0.0235172	50	0.060068	0.0267512	2.24543	0.0247558	0.13488
GO_SODIUM_ION_BINDING	Y	0.0071966	13	0.117517	0.0411758	2.85402	0.00432335	0.0410609
GO_C_C_CHEMOKINE_RECEPTOR_ACTIVITY	Y	0.00531616	9	-0.109368	0.102715	-1.06477	0.286997	0.545235
GO_OXIDOREDUCTASE_ACTIVITY	Y	0.15688	516	-0.0564025	0.0121831	-4.62957	3.69721e-06	0.000110797
GO_MONOSACCHARIDE_BINDING	Y	0.0260411	56	-0.0240663	0.0333933	-0.720692	0.471111	0.704097
GO_CORE_PROMOTER_PROXIMAL_REGION_DNA_BINDING	Y	0.102303	298	0.0513791	0.0116054	4.42717	9.61981e-06	0.000241535
GO_EPHRIN_RECEPTOR_ACTIVITY	Y	0.00873262	16	0.093914	0.0434273	2.16256	0.0305922	0.154458
GO_ATPASE_ACTIVITY	Y	0.112738	335	-0.0277565	0.0139096	-1.99549	0.046009	0.194284
GO_GTPASE_BINDING	Y	0.0930164	265	0.0587477	0.0119393	4.92053	8.7291e-07	3.00346e-05
GO_PRE_MRNA_BINDING	Y	0.012004	23	0.0847157	0.0358963	2.36001	0.018288	0.110322
GO_TRANSMEMBRANE_RECEPTOR_PROTEIN_SERINE_THREONINE_KINASE_ACTIVITY	Y	0.00869459	16	0.103018	0.0400777	2.57044	0.010167	0.0761708
GO_G_PROTEIN_COUPLED_RECEPTOR_BINDING	Y	0.0754265	202	-0.00669949	0.0167679	-0.399543	0.689499	0.8552
GO_LIGASE_ACTIVITY_FORMING_CARBON_OXYGEN_BONDS	Y	0.0159875	32	-0.115419	0.0555589	-2.07742	0.0377812	0.176269
GO_PURINERGIC_RECEPTOR_ACTIVITY	Y	0.011142	21	-0.104413	0.0673449	-1.55042	0.121063	0.328853
GO_CARBON_OXYGEN_LYASE_ACTIVITY	Y	0.0267622	58	-0.0516534	0.035577	-1.45188	0.146559	0.366611
GO_ADENYL_NUCLEOTIDE_BINDING	Y	0.304194	1272	0.0140073	0.00657685	2.12979	0.033206	0.16151
GO_EXTRACELLULAR_GLUTAMATE_GATED_ION_CHANNEL_ACTIVITY	Y	0.00935514	17	0.0186133	0.0529954	0.351224	0.725425	0.870412
GO_SOLUTE_SODIUM_SYMPORTER_ACTIVITY	Y	0.0220173	46	0.0322902	0.0307611	1.04971	0.29387	0.549306
GO_PHOSPHATIDATE_PHOSPHATASE_ACTIVITY	Y	0.00639798	11	-0.00194244	0.0703493	-0.0276113	0.977973	0.988614
GO_TRANSFERASE_ACTIVITY_TRANSFERRING_PENTOSYL_GROUPS	Y	0.0224604	47	-0.00447	0.0343459	-0.130147	0.896452	0.951473
GO_NUCLEOTIDE_KINASE_ACTIVITY	Y	0.011691	22	0.0309475	0.0447046	0.692267	0.488781	0.715382
GO_NEUROTRANSMITTER_TRANSPORTER_ACTIVITY	Y	0.0117006	22	0.0201359	0.0463094	0.434813	0.663705	0.839648
GO_TRNA_METHYLTRANSFERASE_ACTIVITY	Y	0.00971647	18	-0.126342	0.0759969	-1.66246	0.0964432	0.282365
GO_HISTONE_METHYLTRANSFERASE_ACTIVITY_H3_K4_SPECIFIC_	Y	0.00825511	15	0.0941387	0.0430008	2.18923	0.0285966	0.148415
GO_CELL_ADHESION_MOLECULE_BINDING	Y	0.0617587	159	0.0517656	0.0156119	3.31578	0.000916201	0.0122865
GO_RECEPTOR_BINDING	Y	0.284516	1155	0.0147353	0.00685189	2.15054	0.0315293	0.155802
GO_RECEPTOR_INHIBITOR_ACTIVITY	Y	0.00630865	11	-0.143194	0.0974227	-1.46982	0.141634	0.362473
GO_CADHERIN_BINDING	Y	0.0128465	25	0.0942165	0.0328393	2.86901	0.00412368	0.0403252
GO_SEMAPHORIN_RECEPTOR_BINDING	Y	0.0106562	20	0.0799712	0.0389565	2.05283	0.0401073	0.180984
GO_METALLOENDOPEPTIDASE_INHIBITOR_ACTIVITY	Y	0.00690485	12	0.00534318	0.0658176	0.0811815	0.935299	0.974837
GO_MAGNESIUM_ION_TRANSMEMBRANE_TRANSPORTER_ACTIVITY	Y	0.0077663	14	0.0962869	0.04304	2.23715	0.025292	0.136606
GO_EPHRIN_RECEPTOR_BINDING	Y	0.0124964	24	0.0748524	0.036739	2.03741	0.041628	0.185378
GO_CHLORIDE_CHANNEL_REGULATOR_ACTIVITY	Y	0.00732571	13	-0.120656	0.0879154	-1.37241	0.169959	0.40485
GO_OPSONIN_BINDING	Y	0.00529584	9	-0.1365	0.108668	-1.25611	0.209096	0.449654
GO_DNA_HELICASE_ACTIVITY	Y	0.0187143	38	-0.0322637	0.0415516	-0.776473	0.437483	0.676242
GO_AMMONIUM_ION_BINDING	Y	0.0244723	52	-0.00832557	0.0330523	-0.251891	0.801129	0.916563
GO_RNA_POLYMERASE_II_TRANSCRIPTION_FACTOR_BINDING	Y	0.0392213	92	0.0634555	0.019638	3.23126	0.00123532	0.0149041
GO_EXONUCLEASE_ACTIVITY_ACTIVE_WITH_EITHER_RIBO_OR_DEOXYRIBONUCLEIC_ACIDS_AND_PRODUCING_5_PHOSPHOMONOESTERS	Y	0.0199931	41	-0.00555315	0.0368918	-0.150525	0.880352	0.944101
GO_ASPARTIC_TYPE_PEPTIDASE_ACTIVITY	Y	0.010234	19	-0.0922637	0.0695091	-1.32736	0.184411	0.42541
GO_RNA_POLYMERASE_ACTIVITY	Y	0.0162148	33	-0.183403	0.0655335	-2.79862	0.00513921	0.045511
GO_PROTEIN_PHOSPHATASE_2A_BINDING	Y	0.0142676	28	0.0755581	0.0336663	2.24432	0.0248272	0.13488
GO_MONOCARBOXYLIC_ACID_BINDING	Y	0.0187287	38	-0.0192984	0.0399633	-0.482903	0.629172	0.811807
GO_ISOMERASE_ACTIVITY	Y	0.0489802	120	-0.072781	0.0261975	-2.77817	0.00547388	0.0479739
GO_HYDROLASE_ACTIVITY_ACTING_ON_CARBON_NITROGEN_BUT_NOT_PEPTIDE_BONDS	Y	0.0482583	117	-0.015943	0.022602	-0.70538	0.480586	0.712064
GO_PLATELET_DERIVED_GROWTH_FACTOR_RECEPTOR_BINDING	Y	0.0079994	15	0.140863	0.0341269	4.12763	3.68642e-05	0.000856171
GO_DNA_POLYMERASE_BINDING	Y	0.00575837	10	-0.191616	0.113197	-1.69277	0.0905208	0.272148
GO_NUCLEOBASE_CONTAINING_COMPOUND_KINASE_ACTIVITY	Y	0.0195191	40	-0.0517255	0.0429673	-1.20383	0.228674	0.468959
GO_TRANSPORTER_ACTIVITY	Y	0.260627	1019	-0.00473544	0.00763841	-0.619951	0.5353	0.746231
GO_VOLTAGE_GATED_CALCIUM_CHANNEL_ACTIVITY	Y	0.0165736	33	0.0348746	0.0360279	0.96799	0.333066	0.584912
GO_CYTOKINE_ACTIVITY	Y	0.0548341	137	-0.0437312	0.0226439	-1.93126	0.0534715	0.214116
GO_EXODEOXYRIBONUCLEASE_ACTIVITY	Y	0.00789051	14	-0.0376682	0.0694485	-0.542391	0.587558	0.787649
GO_4_IRON_4_SULFUR_CLUSTER_BINDING	Y	0.0139672	27	-0.0181233	0.0473034	-0.383129	0.70163	0.864475
GO_OXIDOREDUCTASE_ACTIVITY_ACTING_ON_PAIRED_DONORS_WITH_INCORPORATION_OR_REDUCTION_OF_MOLECULAR_OXYGEN_NAD_P_H_AS_ONE_DONOR_AND_INCORPORATION_OF_ONE_ATOM_OF_OXYGEN	Y	0.013523	26	-0.0117554	0.0471993	-0.249059	0.803319	0.917938
GO_PHOSPHOLIPASE_ACTIVITY	Y	0.0350916	80	-0.0468197	0.0300602	-1.55753	0.119368	0.325198
GO_ARACHIDONIC_ACID_MONOOXYGENASE_ACTIVITY	Y	0.00333052	6	0.197813	0.0435314	4.54415	5.56178e-06	0.000151967
GO_N_ACETYLTRANSFERASE_ACTIVITY	Y	0.0321536	72	0.0326236	0.0246274	1.32469	0.185296	0.42609
GO_HYDROLASE_ACTIVITY_HYDROLYZING_O_GLYCOSYL_COMPOUNDS	Y	0.0336686	76	-0.0295284	0.029172	-1.01222	0.311452	0.561822
GO_MACROMOLECULAR_COMPLEX_BINDING	Y	0.290857	1198	0.0373609	0.00637895	5.8569	4.82147e-09	3.19939e-07
GO_INTRAMOLECULAR_OXIDOREDUCTASE_ACTIVITY_INTERCONVERTING_ALDOSES_AND_KETOSES	Y	0.00521004	9	-0.237266	0.132475	-1.79103	0.0733106	0.244984
GO_ACID_THIOL_LIGASE_ACTIVITY	Y	0.00983347	18	-0.0163532	0.057521	-0.2843	0.776185	0.903604
GO_STRUCTURAL_MOLECULE_ACTIVITY	Y	0.152116	494	-0.0409256	0.0119564	-3.4229	0.000621346	0.0088207
GO_HISTONE_DEACETYLASE_ACTIVITY_H3_K14_SPECIFIC_	Y	0.00633554	11	-0.114361	0.0940271	-1.21625	0.223908	0.461501
GO_RNA_BINDING	Y	0.298431	1237	0.0127515	0.00667983	1.90896	0.0562881	0.217882
GO_ODORANT_BINDING	Y	0.00504965	9	-0.415529	0.155109	-2.67895	0.00739399	0.0627992
GO_CYSTEINE_TYPE_ENDOPEPTIDASE_INHIBITOR_ACTIVITY	Y	0.0173948	35	0.0489075	0.033311	1.46821	0.14207	0.362591
GO_PHOSPHATIDYLINOSITOL_3_4_5_TRISPHOSPHATE_BINDING	Y	0.0152893	30	0.0214723	0.0395023	0.543571	0.586745	0.787649
GO_RNA_POLYMERASE_II_DISTAL_ENHANCER_SEQUENCE_SPECIFIC_DNA_BINDING	Y	0.0276082	60	0.020247	0.0281071	0.720353	0.47132	0.704097
GO_CYTOKINE_RECEPTOR_BINDING	Y	0.0736025	196	0.0102552	0.0161516	0.634935	0.525481	0.741999
GO_PHOSPHATASE_REGULATOR_ACTIVITY	Y	0.0327591	74	0.0567534	0.0223972	2.53396	0.0112891	0.0819339
GO_OXIDOREDUCTASE_ACTIVITY_ACTING_ON_THE_CH_NH_GROUP_OF_DONORS	Y	0.0105613	20	-0.173447	0.0823447	-2.10635	0.0351919	0.166803
GO_TUMOR_NECROSIS_FACTOR_RECEPTOR_SUPERFAMILY_BINDING	Y	0.020408	42	-0.00675063	0.0365833	-0.184527	0.853602	0.934036
GO_PROTEIN_CHANNEL_ACTIVITY	Y	0.00533528	9	-0.0804811	0.0975754	-0.824809	0.409494	0.649875
GO_CORE_PROMOTER_SEQUENCE_SPECIFIC_DNA_BINDING	Y	0.0385136	91	0.0869429	0.0182541	4.76292	1.92722e-06	6.09853e-05
GO_HISTONE_KINASE_ACTIVITY	Y	0.0102889	19	0.0372648	0.0470867	0.791409	0.428719	0.667135
GO_ARMADILLO_REPEAT_DOMAIN_BINDING	Y	0.00690145	12	0.0204343	0.0626148	0.32635	0.744165	0.881797
GO_CATION_CHANNEL_ACTIVITY	Y	0.0874753	243	0.0147924	0.0143285	1.03237	0.301916	0.555469
GO_RAB_GUANYL_NUCLEOTIDE_EXCHANGE_FACTOR_ACTIVITY	Y	0.014408	28	0.0215915	0.0408606	0.528419	0.597217	0.793726
GO_OXIDIZED_NAD_BINDING	Y	0.00684301	12	0.0743986	0.0512414	1.45192	0.146545	0.366611
GO_GROWTH_FACTOR_BINDING	Y	0.0458259	110	0.024606	0.0205079	1.19983	0.230225	0.471099
GO_CALCIUM_CHANNEL_REGULATOR_ACTIVITY	Y	0.016583	33	0.0294676	0.0366614	0.803777	0.421539	0.658168
GO_THIOESTERASE_BINDING	Y	0.0052788	9	0.0952339	0.054247	1.75556	0.079185	0.257213
GO_INOSITOL_TRISPHOSPHATE_PHOSPHATASE_ACTIVITY	Y	0.00639546	11	0.0179488	0.0659701	0.272075	0.785569	0.907703
GO_TRANSFERASE_ACTIVITY_TRANSFERRING_PHOSPHORUS_CONTAINING_GROUPS	Y	0.229669	857	0.0288777	0.00755229	3.8237	0.000132032	0.00245315
GO_HYDROLASE_ACTIVITY_ACTING_ON_ETHER_BONDS	Y	0.00534289	9	-0.0672524	0.093485	-0.719392	0.471911	0.704097
GO_ACYL_COA_DEHYDROGENASE_ACTIVITY	Y	0.00689523	12	-0.037981	0.0749061	-0.507049	0.612129	0.804339
GO_LIGASE_ACTIVITY	Y	0.115116	344	0.0243753	0.0117437	2.07561	0.0379481	0.176269
GO_HEXOSAMINIDASE_ACTIVITY	Y	0.0078655	14	-0.0719015	0.0758984	-0.947339	0.343483	0.593114
GO_MRNA_3_UTR_BINDING	Y	0.0208561	45	0.121946	0.0227595	5.35803	8.54646e-08	4.67039e-06
GO_SEMAPHORIN_RECEPTOR_ACTIVITY	Y	0.00583759	10	0.0713167	0.0576842	1.23633	0.216356	0.455768
GO_PHOSPHATIDYLINOSITOL_4_PHOSPHATE_BINDING	Y	0.0101922	19	0.0801744	0.0398359	2.01262	0.0441742	0.191766
GO_CYSTEINE_TYPE_ENDOPEPTIDASE_ACTIVITY_INVOLVED_IN_APOPTOTIC_PROCESS	Y	0.00688762	12	0.0426068	0.0579682	0.735003	0.46235	0.697278
GO_SODIUM_CHANNEL_ACTIVITY	Y	0.016029	32	0.069985	0.0321718	2.17535	0.0296204	0.151194
GO_STRUCTURE_SPECIFIC_DNA_BINDING	Y	0.0412738	97	0.0272302	0.0216543	1.2575	0.208595	0.449616
GO_COENZYME_BINDING	Y	0.0583917	148	-0.0474533	0.0219804	-2.15889	0.0308759	0.155047
GO_SNORNA_BINDING	Y	0.0106212	20	-0.140538	0.0727089	-1.93288	0.0532711	0.214116
GO_SODIUM_ION_TRANSMEMBRANE_TRANSPORTER_ACTIVITY	Y	0.0494625	121	0.042511	0.0184236	2.30742	0.0210457	0.120688
GO_NUCLEOTIDYLTRANSFERASE_ACTIVITY	Y	0.0419137	99	-0.0472203	0.0270343	-1.74668	0.080715	0.257681
GO_CALCIUM_DEPENDENT_PHOSPHOLIPID_BINDING	Y	0.0211198	44	-0.0722549	0.0429876	-1.68083	0.0928177	0.277259
GO_CYSTEINE_TYPE_ENDOPEPTIDASE_REGULATOR_ACTIVITY_INVOLVED_IN_APOPTOTIC_PROCESS	Y	0.0165693	33	0.0370551	0.0357596	1.03623	0.300114	0.555404
GO_HISTONE_METHYLTRANSFERASE_ACTIVITY	Y	0.023486	50	0.0650221	0.0262793	2.47427	0.0133625	0.0912775
GO_PROTEIN_TYROSINE_KINASE_ACTIVATOR_ACTIVITY	Y	0.0079002	14	0.0129058	0.0594671	0.217024	0.828193	0.92725

## Sheet: mirna_mrna_kegg_bfgs
GS	gene.tested	coef	std.err	loss	z.score	p.value	adj.p.val
KEGG_GLYCOLYSIS_GLUCONEOGENESIS	51	-0.132197	0.0464742	0.0237099	-2.84452	0.00444779	0.0282539
KEGG_CITRATE_CYCLE_TCA_CYCLE	27	-0.131164	0.0636969	0.0137817	-2.0592	0.0394755	0.124448
KEGG_PENTOSE_PHOSPHATE_PATHWAY	23	-0.0981331	0.0637265	0.0120647	-1.53991	0.123582	0.273646
KEGG_PENTOSE_AND_GLUCURONATE_INTERCONVERSIONS	9	0.0765499	0.0593106	0.00531363	1.29066	0.196821	0.385355
KEGG_FRUCTOSE_AND_MANNOSE_METABOLISM	26	-0.0400732	0.051321	0.0135017	-0.780835	0.4349	0.65131
KEGG_GALACTOSE_METABOLISM	16	-0.0451419	0.0663564	0.00886004	-0.680294	0.496318	0.703252
KEGG_ASCORBATE_AND_ALDARATE_METABOLISM	9	0.00787781	0.0753678	0.00536329	0.104525	0.916753	0.947311
KEGG_FATTY_ACID_METABOLISM	36	-0.0528698	0.0452253	0.0178362	-1.16903	0.24239	0.442006
KEGG_STEROID_BIOSYNTHESIS	17	-0.0291671	0.0614788	0.00935086	-0.474425	0.635197	0.763218
KEGG_PRIMARY_BILE_ACID_BIOSYNTHESIS	8	-0.108422	0.110819	0.0047933	-0.97837	0.327891	0.539715
KEGG_STEROID_HORMONE_BIOSYNTHESIS	22	0.0166551	0.0468431	0.0117024	0.355551	0.722177	0.821935
KEGG_OXIDATIVE_PHOSPHORYLATION	80	-0.242571	0.0466823	0.0337832	-5.19621	2.03397e-07	1.89159e-05
KEGG_PURINE_METABOLISM	131	-0.0463671	0.0233311	0.0528376	-1.98735	0.0468835	0.14065
KEGG_PYRIMIDINE_METABOLISM	75	-0.101641	0.0356301	0.032985	-2.85267	0.00433534	0.0282539
KEGG_ALANINE_ASPARTATE_AND_GLUTAMATE_METABOLISM	25	-0.0747241	0.0575613	0.0130058	-1.29817	0.19423	0.384327
KEGG_GLYCINE_SERINE_AND_THREONINE_METABOLISM	23	-0.0913034	0.0626394	0.0120762	-1.4576	0.14495	0.309894
KEGG_CYSTEINE_AND_METHIONINE_METABOLISM	26	-0.0499165	0.0527693	0.0134901	-0.945937	0.344181	0.556675
KEGG_VALINE_LEUCINE_AND_ISOLEUCINE_DEGRADATION	39	-0.122141	0.0518973	0.018912	-2.35352	0.0185967	0.0757038
KEGG_VALINE_LEUCINE_AND_ISOLEUCINE_BIOSYNTHESIS	9	-0.171367	0.120643	0.00526749	-1.42045	0.155477	0.321318
KEGG_LYSINE_DEGRADATION	39	0.0152138	0.0353996	0.0191516	0.429774	0.66736	0.775806
KEGG_ARGININE_AND_PROLINE_METABOLISM	46	-0.111097	0.0465412	0.021805	-2.38707	0.0169834	0.073463
KEGG_HISTIDINE_METABOLISM	23	-0.108627	0.0654007	0.0120461	-1.66095	0.0967227	0.237225
KEGG_TYROSINE_METABOLISM	33	-0.211185	0.0683989	0.0161263	-3.08755	0.00201814	0.0163206
KEGG_PHENYLALANINE_METABOLISM	15	-0.0755672	0.0744628	0.00834991	-1.01483	0.310186	0.519771
KEGG_TRYPTOPHAN_METABOLISM	34	-0.124964	0.0559502	0.0168127	-2.23348	0.0255173	0.0988794
KEGG_BETA_ALANINE_METABOLISM	20	-0.0926161	0.0673937	0.0106988	-1.37425	0.169363	0.338726
KEGG_TAURINE_AND_HYPOTAURINE_METABOLISM	8	0.0403795	0.0716837	0.00482463	0.563301	0.57323	0.760303
KEGG_SELENOAMINO_ACID_METABOLISM	20	0.0015123	0.0516182	0.0107789	0.0292979	0.976627	0.986857
KEGG_GLUTATHIONE_METABOLISM	34	-0.176945	0.062833	0.0166544	-2.81611	0.00486089	0.0282539
KEGG_STARCH_AND_SUCROSE_METABOLISM	26	0.0134073	0.0435856	0.013522	0.307608	0.758381	0.849752
KEGG_N_GLYCAN_BIOSYNTHESIS	40	-0.00595079	0.0373898	0.019576	-0.159155	0.873547	0.917964
KEGG_OTHER_GLYCAN_DEGRADATION	14	-0.194135	0.101449	0.00772201	-1.91361	0.0556695	0.153124
KEGG_O_GLYCAN_BIOSYNTHESIS	27	0.0279794	0.040758	0.0139569	0.686477	0.492412	0.703252
KEGG_AMINO_SUGAR_AND_NUCLEOTIDE_SUGAR_METABOLISM	34	-0.0783847	0.0498433	0.0169329	-1.57262	0.115806	0.259517
KEGG_GLYCOSAMINOGLYCAN_DEGRADATION	18	-0.00706537	0.0558901	0.00983587	-0.126415	0.899403	0.937856
KEGG_GLYCOSAMINOGLYCAN_BIOSYNTHESIS_CHONDROITIN_SULFATE	20	-0.0521487	0.0605339	0.0107496	-0.861479	0.388974	0.607976
KEGG_GLYCOSAMINOGLYCAN_BIOSYNTHESIS_KERATAN_SULFATE	14	-0.0807239	0.0781218	0.00785744	-1.03331	0.30146	0.514418
KEGG_GLYCOSAMINOGLYCAN_BIOSYNTHESIS_HEPARAN_SULFATE	22	0.0569703	0.0408117	0.0116458	1.39593	0.162736	0.332624
KEGG_GLYCEROLIPID_METABOLISM	40	-0.0146566	0.0384028	0.0195715	-0.381654	0.702718	0.806825
KEGG_INOSITOL_PHOSPHATE_METABOLISM	52	0.0203858	0.0301594	0.024459	0.675935	0.499082	0.703252
KEGG_GLYCOSYLPHOSPHATIDYLINOSITOL_GPI_ANCHOR_BIOSYNTHESIS	21	-0.154579	0.0761596	0.0110528	-2.02967	0.04239	0.131409
KEGG_GLYCEROPHOSPHOLIPID_METABOLISM	68	-0.0841632	0.0357987	0.0304695	-2.35101	0.0187225	0.0757038
KEGG_ETHER_LIPID_METABOLISM	29	-0.0295195	0.0471328	0.0148448	-0.626306	0.531114	0.726377
KEGG_ARACHIDONIC_ACID_METABOLISM	41	-0.0503142	0.042083	0.0199376	-1.19559	0.231855	0.42698
KEGG_LINOLEIC_ACID_METABOLISM	21	-0.00996099	0.0522145	0.0112433	-0.190771	0.848705	0.911775
KEGG_ALPHA_LINOLENIC_ACID_METABOLISM	16	-0.180249	0.0922102	0.00869379	-1.95476	0.0506116	0.144827
KEGG_SPHINGOLIPID_METABOLISM	36	-0.0221443	0.0413944	0.0178796	-0.53496	0.592677	0.760303
KEGG_GLYCOSPHINGOLIPID_BIOSYNTHESIS_LACTO_AND_NEOLACTO_SERIES	22	0.00807156	0.0481933	0.011706	0.167483	0.86699	0.917964
KEGG_GLYCOSPHINGOLIPID_BIOSYNTHESIS_GLOBO_SERIES	12	0.0325671	0.0601428	0.00689534	0.541496	0.588166	0.760303
KEGG_GLYCOSPHINGOLIPID_BIOSYNTHESIS_GANGLIO_SERIES	13	0.0540236	0.0536113	0.00737411	1.00769	0.313603	0.520804
KEGG_PYRUVATE_METABOLISM	34	-0.186276	0.064075	0.0166243	-2.90716	0.00364726	0.026092
KEGG_GLYOXYLATE_AND_DICARBOXYLATE_METABOLISM	13	-0.424252	0.153932	0.00694147	-2.7561	0.00584956	0.0310862
KEGG_PROPANOATE_METABOLISM	28	-0.128711	0.0621932	0.0142253	-2.06953	0.0384962	0.123896
KEGG_BUTANOATE_METABOLISM	32	-0.0872595	0.0525686	0.016056	-1.65992	0.0969308	0.237225
KEGG_ONE_CARBON_POOL_BY_FOLATE	13	-0.215258	0.109818	0.00721255	-1.96013	0.0499804	0.144827
KEGG_RIBOFLAVIN_METABOLISM	13	-0.0278722	0.0700295	0.00740023	-0.398007	0.690625	0.797865
KEGG_NICOTINATE_AND_NICOTINAMIDE_METABOLISM	18	-0.0421861	0.0620417	0.00981851	-0.679964	0.496527	0.703252
KEGG_PANTOTHENATE_AND_COA_BIOSYNTHESIS	13	0.0279712	0.0586971	0.00739858	0.476535	0.633693	0.763218
KEGG_FOLATE_BIOSYNTHESIS	8	-0.104315	0.109698	0.0047959	-0.950928	0.341641	0.556675
KEGG_RETINOL_METABOLISM	30	0.0446528	0.0365262	0.0152511	1.22249	0.221523	0.416195
KEGG_PORPHYRIN_AND_CHLOROPHYLL_METABOLISM	19	-0.0421959	0.06039	0.0102906	-0.698724	0.484725	0.703252
KEGG_TERPENOID_BACKBONE_BIOSYNTHESIS	13	-0.0718508	0.0792008	0.00737251	-0.907199	0.364302	0.579146
KEGG_LIMONENE_AND_PINENE_DEGRADATION	10	-0.101123	0.0973481	0.00583802	-1.03878	0.298906	0.514418
KEGG_NITROGEN_METABOLISM	19	-0.0503115	0.0617813	0.0102835	-0.814348	0.415446	0.638619
KEGG_SULFUR_METABOLISM	7	-0.0149777	0.0918006	0.00429636	-0.163155	0.870397	0.917964
KEGG_AMINOACYL_TRNA_BIOSYNTHESIS	32	-0.109803	0.0556135	0.0160019	-1.97439	0.0483371	0.14271
KEGG_METABOLISM_OF_XENOBIOTICS_BY_CYTOCHROME_P450	30	0.00766756	0.0413446	0.0152982	0.185455	0.852872	0.911775
KEGG_DRUG_METABOLISM_CYTOCHROME_P450	32	-0.0013774	0.0411994	0.0161718	-0.0334325	0.97333	0.986857
KEGG_DRUG_METABOLISM_OTHER_ENZYMES	26	-0.0266172	0.0493517	0.0135143	-0.539337	0.589655	0.760303
KEGG_BIOSYNTHESIS_OF_UNSATURATED_FATTY_ACIDS	18	0.0556154	0.0453223	0.00978903	1.22711	0.219782	0.416195
KEGG_ABC_TRANSPORTERS	30	-0.000293792	0.0424029	0.0152994	-0.0069286	0.994472	0.994472
KEGG_RIBOSOME	30	-0.292788	0.0832517	0.014621	-3.5169	0.000436612	0.00507562
KEGG_RNA_DEGRADATION	48	0.0238922	0.0310227	0.0228466	0.770152	0.44121	0.65131
KEGG_RNA_POLYMERASE	21	-0.170335	0.0788185	0.0110223	-2.16111	0.0306868	0.107693
KEGG_BASAL_TRANSCRIPTION_FACTORS	30	-0.0216017	0.0452681	0.0152909	-0.477196	0.633223	0.763218
KEGG_DNA_REPLICATION	26	-0.124397	0.0638884	0.0133563	-1.9471	0.0515224	0.1452
KEGG_SPLICEOSOME	97	-0.0693472	0.0288484	0.0410917	-2.40385	0.0162234	0.0718464
KEGG_PROTEASOME	27	-0.141882	0.0652894	0.0137565	-2.17312	0.0297709	0.107693
KEGG_PROTEIN_EXPORT	23	-0.0425733	0.0549544	0.0121428	-0.774703	0.438515	0.65131
KEGG_PPAR_SIGNALING_PATHWAY	53	0.00614567	0.0312845	0.0248717	0.196445	0.844262	0.911775
KEGG_BASE_EXCISION_REPAIR	22	-0.135586	0.0712856	0.011543	-1.90201	0.0571701	0.154111
KEGG_NUCLEOTIDE_EXCISION_REPAIR	33	-0.035924	0.0450204	0.0165802	-0.79795	0.424899	0.647797
KEGG_MISMATCH_REPAIR	15	-0.0758494	0.074518	0.00834963	-1.01787	0.308741	0.519771
KEGG_HOMOLOGOUS_RECOMBINATION	17	-0.103794	0.0751676	0.00927697	-1.38084	0.167329	0.338296
KEGG_NON_HOMOLOGOUS_END_JOINING	9	-0.0600787	0.0921989	0.00534662	-0.65162	0.514646	0.71862
KEGG_MAPK_SIGNALING_PATHWAY	238	0.047278	0.0130523	0.0856434	3.6222	0.000292113	0.00417946
KEGG_ERBB_SIGNALING_PATHWAY	82	0.0837152	0.0193629	0.0353678	4.32348	1.53588e-05	0.000367811
KEGG_CALCIUM_SIGNALING_PATHWAY	153	0.00844994	0.018352	0.0601802	0.460436	0.645203	0.763218
KEGG_CYTOKINE_CYTOKINE_RECEPTOR_INTERACTION	184	0.000397235	0.0171781	0.0699448	0.0231244	0.981551	0.986857
KEGG_CHEMOKINE_SIGNALING_PATHWAY	151	0.0323609	0.0171034	0.059424	1.89207	0.0584814	0.155394
KEGG_PHOSPHATIDYLINOSITOL_SIGNALING_SYSTEM	70	0.0318362	0.0250467	0.0314045	1.27107	0.203703	0.394674
KEGG_NEUROACTIVE_LIGAND_RECEPTOR_INTERACTION	203	-0.013427	0.0170686	0.0757109	-0.786652	0.431485	0.65131
KEGG_CELL_CYCLE	100	0.03055	0.0210815	0.0423169	1.44914	0.147299	0.311336
KEGG_OOCYTE_MEIOSIS	92	0.0385872	0.0213858	0.0394386	1.80434	0.0711783	0.181358
KEGG_P53_SIGNALING_PATHWAY	56	0.0502134	0.0262734	0.0259438	1.91118	0.0559809	0.153124
KEGG_UBIQUITIN_MEDIATED_PROTEOLYSIS	119	0.0439286	0.0185025	0.0487744	2.37419	0.0175874	0.0743467
KEGG_SNARE_INTERACTIONS_IN_VESICULAR_TRANSPORT	34	-0.0196069	0.042274	0.0170273	-0.463806	0.642787	0.763218
KEGG_REGULATION_OF_AUTOPHAGY	22	0.0149341	0.047139	0.0117035	0.316809	0.751388	0.84702
KEGG_LYSOSOME	110	-0.0393106	0.0249462	0.0457789	-1.57582	0.115068	0.259517
KEGG_ENDOCYTOSIS	159	0.0527314	0.0155974	0.0617481	3.38079	0.000722788	0.00665217
KEGG_PEROXISOME	66	-0.0729845	0.0352913	0.0297631	-2.06806	0.0386344	0.123896
KEGG_MTOR_SIGNALING_PATHWAY	51	0.105349	0.0226143	0.0234622	4.65849	3.18536e-06	0.000118495
KEGG_APOPTOSIS	71	0.0195546	0.0259036	0.0318161	0.754898	0.45031	0.659509
KEGG_CARDIAC_MUSCLE_CONTRACTION	53	-0.0383834	0.0357951	0.0248288	-1.07231	0.283582	0.497606
KEGG_VASCULAR_SMOOTH_MUSCLE_CONTRACTION	97	0.0081071	0.023021	0.0413227	0.352162	0.724717	0.821935
KEGG_WNT_SIGNALING_PATHWAY	136	0.0575217	0.016555	0.0542685	3.47458	0.00051165	0.00559805
KEGG_DORSO_VENTRAL_AXIS_FORMATION	22	0.0524623	0.0414725	0.0116562	1.26499	0.205875	0.39477
KEGG_NOTCH_SIGNALING_PATHWAY	40	0.0176373	0.034679	0.019568	0.508587	0.611042	0.763218
KEGG_HEDGEHOG_SIGNALING_PATHWAY	49	0.0185442	0.031253	0.0232587	0.593359	0.552941	0.742491
KEGG_TGF_BETA_SIGNALING_PATHWAY	74	0.0647366	0.0217602	0.0326879	2.975	0.00292993	0.0217987
KEGG_AXON_GUIDANCE	119	0.101872	0.0152361	0.0476686	6.68623	2.28995e-11	4.2593e-09
KEGG_VEGF_SIGNALING_PATHWAY	71	0.0230301	0.0256099	0.0318082	0.899263	0.368513	0.580876
KEGG_FOCAL_ADHESION	181	0.0584546	0.0143651	0.0684959	4.06921	4.71732e-05	0.000974913
KEGG_ECM_RECEPTOR_INTERACTION	78	-0.00139299	0.0264328	0.0344494	-0.0526991	0.957972	0.979026
KEGG_CELL_ADHESION_MOLECULES_CAMS	106	0.0365368	0.0200778	0.0443787	1.81976	0.068795	0.177721
KEGG_ADHERENS_JUNCTION	67	0.0935697	0.0206405	0.0297239	4.53329	5.80708e-06	0.000180019
KEGG_TIGHT_JUNCTION	112	0.0418308	0.0191974	0.0464093	2.17898	0.029333	0.107693
KEGG_GAP_JUNCTION	76	0.0510515	0.022521	0.0335435	2.26684	0.0234	0.0926043
KEGG_COMPLEMENT_AND_COAGULATION_CASCADES	55	-0.086903	0.040077	0.0254686	-2.1684	0.0301283	0.107693
KEGG_ANTIGEN_PROCESSING_AND_PRESENTATION	40	-0.00999063	0.0378601	0.0195743	-0.263883	0.79187	0.876713
KEGG_RENIN_ANGIOTENSIN_SYSTEM	16	0.0266784	0.0531534	0.00886965	0.501914	0.615728	0.763218
KEGG_TOLL_LIKE_RECEPTOR_SIGNALING_PATHWAY	74	0.0257713	0.0248632	0.0329254	1.03653	0.299956	0.514418
KEGG_NOD_LIKE_RECEPTOR_SIGNALING_PATHWAY	52	-0.0177597	0.0340113	0.0244645	-0.522172	0.601551	0.763218
KEGG_RIG_I_LIKE_RECEPTOR_SIGNALING_PATHWAY	51	0.041606	0.0283528	0.0240046	1.46744	0.142257	0.307672
KEGG_CYTOSOLIC_DNA_SENSING_PATHWAY	36	-0.0192261	0.0410383	0.0178821	-0.468493	0.639432	0.763218
KEGG_JAK_STAT_SIGNALING_PATHWAY	114	0.0190821	0.0205156	0.0472214	0.930126	0.352306	0.564904
KEGG_HEMATOPOIETIC_CELL_LINEAGE	63	-0.00584014	0.0298056	0.0287859	-0.195941	0.844657	0.911775
KEGG_NATURAL_KILLER_CELL_MEDIATED_CYTOTOXICITY	87	0.0333441	0.0223756	0.0376706	1.4902	0.136171	0.297974
KEGG_T_CELL_RECEPTOR_SIGNALING_PATHWAY	99	0.0554567	0.0194755	0.0417781	2.84751	0.00440627	0.0282539
KEGG_B_CELL_RECEPTOR_SIGNALING_PATHWAY	67	0.040138	0.0248881	0.030235	1.61274	0.106801	0.254679
KEGG_FC_EPSILON_RI_SIGNALING_PATHWAY	73	0.0127276	0.0261215	0.0325791	0.487248	0.626083	0.763218
KEGG_FC_GAMMA_R_MEDIATED_PHAGOCYTOSIS	90	0.0395597	0.0215495	0.038717	1.83576	0.0663934	0.173932
KEGG_LEUKOCYTE_TRANSENDOTHELIAL_MIGRATION	99	0.0257464	0.0215255	0.0419861	1.19609	0.231662	0.42698
KEGG_INTESTINAL_IMMUNE_NETWORK_FOR_IGA_PRODUCTION	31	-0.00232533	0.0419819	0.0157366	-0.0553889	0.955829	0.979026
KEGG_CIRCADIAN_RHYTHM_MAMMAL	13	0.0597948	0.0525105	0.00736579	1.13872	0.254819	0.454719
KEGG_LONG_TERM_POTENTIATION	60	0.0870096	0.0222929	0.0271782	3.90302	9.49992e-05	0.00176698
KEGG_NEUROTROPHIN_SIGNALING_PATHWAY	115	0.0600304	0.017812	0.0472371	3.37023	0.000751052	0.00665217
KEGG_LONG_TERM_DEPRESSION	65	0.0494849	0.0244659	0.029425	2.0226	0.0431139	0.131462
KEGG_OLFACTORY_TRANSDUCTION	56	-0.170237	0.0482803	0.0254689	-3.52602	0.000421855	0.00507562
KEGG_TASTE_TRANSDUCTION	27	-0.107038	0.0601316	0.0138352	-1.78006	0.0750664	0.18868
KEGG_REGULATION_OF_ACTIN_CYTOSKELETON	188	0.0406694	0.0149509	0.0709325	2.7202	0.00652428	0.0337088
KEGG_INSULIN_SIGNALING_PATHWAY	122	0.0481442	0.0180197	0.0497443	2.67175	0.00754577	0.0359875
KEGG_GNRH_SIGNALING_PATHWAY	86	0.0322164	0.0225899	0.037314	1.42614	0.153828	0.321318
KEGG_PROGESTERONE_MEDIATED_OOCYTE_MATURATION	71	0.0490921	0.023451	0.0316952	2.09339	0.036314	0.122808
KEGG_MELANOGENESIS	90	0.0569395	0.0203055	0.0385796	2.80414	0.00504504	0.0284357
KEGG_ADIPOCYTOKINE_SIGNALING_PATHWAY	63	0.0408371	0.025598	0.0287043	1.59532	0.11064	0.259517
KEGG_TYPE_II_DIABETES_MELLITUS	44	0.0210598	0.032701	0.0212207	0.644011	0.519568	0.71862
KEGG_TYPE_I_DIABETES_MELLITUS	28	-0.0260516	0.0474796	0.0144061	-0.54869	0.583218	0.760303
KEGG_MATURITY_ONSET_DIABETES_OF_THE_YOUNG	23	-0.0255464	0.0523014	0.0121572	-0.488446	0.625234	0.763218
KEGG_ALDOSTERONE_REGULATED_SODIUM_REABSORPTION	38	0.0798273	0.0286434	0.0185059	2.78693	0.00532099	0.0291089
KEGG_VASOPRESSIN_REGULATED_WATER_REABSORPTION	37	0.00863016	0.0371227	0.0183129	0.232477	0.816168	0.898268
KEGG_PROXIMAL_TUBULE_BICARBONATE_RECLAMATION	19	0.0308278	0.0480998	0.0102958	0.640913	0.521579	0.71862
KEGG_ALZHEIMERS_DISEASE	108	-0.0554121	0.0263348	0.0450066	-2.10414	0.0353665	0.121818
KEGG_PARKINSONS_DISEASE	74	-0.157638	0.0408773	0.0322662	-3.85637	0.000115085	0.00194599
KEGG_AMYOTROPHIC_LATERAL_SCLEROSIS_ALS	45	0.00628827	0.0339257	0.0216439	0.185354	0.852951	0.911775
KEGG_HUNTINGTONS_DISEASE	119	-0.054352	0.0250211	0.0487702	-2.17225	0.0298371	0.107693
KEGG_PRION_DISEASES	26	0.0200934	0.0426398	0.0135177	0.471236	0.637472	0.763218
KEGG_VIBRIO_CHOLERAE_INFECTION	49	-0.088645	0.0426413	0.0230889	-2.07885	0.0376308	0.123896
KEGG_EPITHELIAL_CELL_SIGNALING_IN_HELICOBACTER_PYLORI_INFECTION	63	-0.0266707	0.0317406	0.0287607	-0.84027	0.400757	0.621174
KEGG_PATHOGENIC_ESCHERICHIA_COLI_INFECTION	44	0.0356647	0.0311378	0.0211915	1.14538	0.25205	0.454719
KEGG_LEISHMANIA_INFECTION	50	0.00397063	0.0324326	0.023673	0.122427	0.902561	0.937856
KEGG_PATHWAYS_IN_CANCER	295	0.044466	0.011878	0.10166	3.74355	0.000181437	0.00281227
KEGG_COLORECTAL_CANCER	57	0.0690114	0.024376	0.0262085	2.83112	0.00463848	0.0282539
KEGG_RENAL_CELL_CARCINOMA	64	0.0917035	0.0212426	0.0286299	4.31695	1.58198e-05	0.000367811
KEGG_PANCREATIC_CANCER	65	0.0757486	0.0223095	0.0292083	3.39534	0.000685422	0.00665217
KEGG_ENDOMETRIAL_CANCER	51	0.0444851	0.0280729	0.0239935	1.58463	0.113051	0.259517
KEGG_GLIOMA	57	0.106648	0.0213299	0.0257483	4.99991	5.73571e-07	3.55614e-05
KEGG_PROSTATE_CANCER	84	0.0887811	0.0188038	0.035999	4.72145	2.34174e-06	0.000108891
KEGG_THYROID_CANCER	28	0.0185977	0.0412957	0.0144105	0.450355	0.652455	0.763249
KEGG_BASAL_CELL_CARCINOMA	52	0.0140433	0.0307906	0.0244674	0.456091	0.648325	0.763218
KEGG_MELANOMA	65	0.0788292	0.0220672	0.0291738	3.57223	0.000353951	0.00470249
KEGG_BLADDER_CANCER	39	0.0499468	0.0314698	0.0190776	1.58713	0.112483	0.259517
KEGG_CHRONIC_MYELOID_LEUKEMIA	67	0.0618544	0.0230843	0.0300966	2.6795	0.00737326	0.0359875
KEGG_ACUTE_MYELOID_LEUKEMIA	55	0.0675586	0.024938	0.0254408	2.70907	0.00674726	0.0339187
KEGG_SMALL_CELL_LUNG_CANCER	75	0.0552791	0.0223421	0.0331416	2.47422	0.0133528	0.0620906
KEGG_NON_SMALL_CELL_LUNG_CANCER	51	0.0767493	0.0250481	0.0237927	3.06408	0.00218344	0.0169216
KEGG_ASTHMA	17	-0.129051	0.0798678	0.00924217	-1.61581	0.106136	0.254679
KEGG_AUTOIMMUNE_THYROID_DISEASE	25	-0.0269559	0.050393	0.0130642	-0.534914	0.592709	0.760303
KEGG_SYSTEMIC_LUPUS_ERYTHEMATOSUS	53	-0.103162	0.0425293	0.0246194	-2.42567	0.0152801	0.0693193
KEGG_ALLOGRAFT_REJECTION	22	-0.0684364	0.0603371	0.0116547	-1.13423	0.256696	0.454719
KEGG_GRAFT_VERSUS_HOST_DISEASE	20	-0.0339412	0.0574813	0.0107656	-0.590474	0.554873	0.742491
KEGG_PRIMARY_IMMUNODEFICIENCY	28	0.0119843	0.0421986	0.0144147	0.283998	0.776412	0.864746
KEGG_HYPERTROPHIC_CARDIOMYOPATHY_HCM	72	0.0691658	0.0217126	0.0319016	3.18551	0.00144499	0.0122167
KEGG_ARRHYTHMOGENIC_RIGHT_VENTRICULAR_CARDIOMYOPATHY_ARVC	65	0.0652371	0.0231546	0.0293108	2.81746	0.00484053	0.0282539
KEGG_DILATED_CARDIOMYOPATHY	76	0.0712133	0.0209944	0.0333567	3.39201	0.000693826	0.00665217
KEGG_VIRAL_MYOCARDITIS	51	0.0183679	0.0306543	0.0240624	0.599195	0.549043	0.742491

## Sheet: mirna_mrna_kegg_iwls_GS
GS	converged	loss	gene.tested	coef	std.err	t.value	p.value	adj.p.val
KEGG_GLYCOLYSIS_GLUCONEOGENESIS	Y	0.0237099	51	-0.132197	0.0457086	-2.89217	0.00383184	0.0263971
KEGG_CITRATE_CYCLE_TCA_CYCLE	Y	0.0137817	27	-0.131165	0.0625506	-2.09694	0.036017	0.119018
KEGG_PENTOSE_PHOSPHATE_PATHWAY	Y	0.0120647	23	-0.0981331	0.0636244	-1.54238	0.123003	0.272364
KEGG_PENTOSE_AND_GLUCURONATE_INTERCONVERSIONS	Y	0.00531363	9	0.0766782	0.0588729	1.30244	0.192789	0.381475
KEGG_FRUCTOSE_AND_MANNOSE_METABOLISM	Y	0.0135017	26	-0.0400732	0.0512184	-0.782399	0.433993	0.650907
KEGG_GALACTOSE_METABOLISM	Y	0.00886004	16	-0.0451418	0.0660327	-0.683629	0.494221	0.703625
KEGG_ASCORBATE_AND_ALDARATE_METABOLISM	Y	0.00536329	9	0.0078778	0.0753849	0.104501	0.916773	0.947332
KEGG_FATTY_ACID_METABOLISM	Y	0.0178362	36	-0.0528696	0.0453253	-1.16645	0.243453	0.443943
KEGG_STEROID_BIOSYNTHESIS	Y	0.00935086	17	-0.0291672	0.061345	-0.475462	0.634465	0.762993
KEGG_PRIMARY_BILE_ACID_BIOSYNTHESIS	Y	0.0047933	8	-0.108479	0.111411	-0.97368	0.330232	0.541908
KEGG_STEROID_HORMONE_BIOSYNTHESIS	Y	0.0117024	22	0.0170756	0.0468102	0.364784	0.715278	0.816207
KEGG_OXIDATIVE_PHOSPHORYLATION	Y	0.0337832	80	-0.242571	0.04616	-5.255	1.5e-07	1.4e-05
KEGG_PURINE_METABOLISM	Y	0.0528376	131	-0.0463671	0.0233769	-1.98346	0.047336	0.13757
KEGG_PYRIMIDINE_METABOLISM	Y	0.0329851	75	-0.101639	0.0357169	-2.84567	0.0044382	0.0266292
KEGG_ALANINE_ASPARTATE_AND_GLUTAMATE_METABOLISM	Y	0.0130058	25	-0.0747241	0.0579668	-1.28909	0.19739	0.386468
KEGG_GLYCINE_SERINE_AND_THREONINE_METABOLISM	Y	0.0120762	23	-0.0913033	0.0620063	-1.47249	0.140912	0.299615
KEGG_CYSTEINE_AND_METHIONINE_METABOLISM	Y	0.0134901	26	-0.0499165	0.0527238	-0.946754	0.34378	0.556027
KEGG_VALINE_LEUCINE_AND_ISOLEUCINE_DEGRADATION	Y	0.018912	39	-0.122141	0.0507235	-2.40799	0.0160536	0.0697182
KEGG_VALINE_LEUCINE_AND_ISOLEUCINE_BIOSYNTHESIS	Y	0.00526749	9	-0.171368	0.113388	-1.51134	0.130726	0.286058
KEGG_LYSINE_DEGRADATION	Y	0.0191516	39	0.0152173	0.0353956	0.429919	0.667261	0.775691
KEGG_ARGININE_AND_PROLINE_METABOLISM	Y	0.021805	46	-0.111097	0.0465379	-2.38724	0.0169885	0.0718152
KEGG_HISTIDINE_METABOLISM	Y	0.0120461	23	-0.108627	0.0650535	-1.66982	0.0949777	0.231224
KEGG_TYROSINE_METABOLISM	Y	0.0161263	33	-0.211245	0.0673309	-3.13741	0.001708	0.0138125
KEGG_PHENYLALANINE_METABOLISM	Y	0.00834991	15	-0.0755638	0.0744642	-1.01477	0.310235	0.519853
KEGG_TRYPTOPHAN_METABOLISM	Y	0.0168127	34	-0.124964	0.0552973	-2.25985	0.0238456	0.0924015
KEGG_BETA_ALANINE_METABOLISM	Y	0.0106988	20	-0.092616	0.0681885	-1.35823	0.174411	0.348823
KEGG_TAURINE_AND_HYPOTAURINE_METABOLISM	Y	0.00482463	8	0.0403885	0.0715526	0.564458	0.572452	0.759953
KEGG_SELENOAMINO_ACID_METABOLISM	Y	0.0107789	20	0.00151148	0.0516233	0.0292789	0.976643	0.986834
KEGG_GLUTATHIONE_METABOLISM	Y	0.0166544	34	-0.176945	0.0616237	-2.87138	0.00409302	0.0266292
KEGG_STARCH_AND_SUCROSE_METABOLISM	Y	0.013522	26	0.013409	0.0436053	0.307509	0.758461	0.849842
KEGG_N_GLYCAN_BIOSYNTHESIS	Y	0.019576	40	-0.00595186	0.037393	-0.159171	0.873537	0.917954
KEGG_OTHER_GLYCAN_DEGRADATION	Y	0.00772201	14	-0.194135	0.104595	-1.85606	0.0634656	0.168637
KEGG_O_GLYCAN_BIOSYNTHESIS	Y	0.0139569	27	0.0279802	0.0406954	0.687551	0.491747	0.703625
KEGG_AMINO_SUGAR_AND_NUCLEOTIDE_SUGAR_METABOLISM	Y	0.0169329	34	-0.078384	0.0496081	-1.58006	0.114115	0.256389
KEGG_GLYCOSAMINOGLYCAN_DEGRADATION	Y	0.00983587	18	-0.00706536	0.055905	-0.126382	0.899432	0.939163
KEGG_GLYCOSAMINOGLYCAN_BIOSYNTHESIS_CHONDROITIN_SULFATE	Y	0.0107496	20	-0.0521486	0.0601723	-0.866655	0.386146	0.603556
KEGG_GLYCOSAMINOGLYCAN_BIOSYNTHESIS_KERATAN_SULFATE	Y	0.00785744	14	-0.0807239	0.077493	-1.04169	0.297572	0.515863
KEGG_GLYCOSAMINOGLYCAN_BIOSYNTHESIS_HEPARAN_SULFATE	Y	0.0116458	22	0.0569701	0.0407697	1.39736	0.162327	0.331788
KEGG_GLYCEROLIPID_METABOLISM	Y	0.0195715	40	-0.0146565	0.038397	-0.38171	0.702682	0.806783
KEGG_INOSITOL_PHOSPHATE_METABOLISM	Y	0.024459	52	0.0203744	0.0301604	0.675535	0.499347	0.703625
KEGG_GLYCOSYLPHOSPHATIDYLINOSITOL_GPI_ANCHOR_BIOSYNTHESIS	Y	0.0110528	21	-0.154579	0.0758985	-2.03665	0.0417035	0.127162
KEGG_GLYCEROPHOSPHOLIPID_METABOLISM	Y	0.0304695	68	-0.0841632	0.0355821	-2.36532	0.018028	0.0728956
KEGG_ETHER_LIPID_METABOLISM	Y	0.0148448	29	-0.0295398	0.0473782	-0.623488	0.532974	0.72892
KEGG_ARACHIDONIC_ACID_METABOLISM	Y	0.0199376	41	-0.0503109	0.042514	-1.1834	0.236672	0.435851
KEGG_LINOLEIC_ACID_METABOLISM	Y	0.0112433	21	-0.00996229	0.0522515	-0.190661	0.848794	0.911973
KEGG_ALPHA_LINOLENIC_ACID_METABOLISM	Y	0.00869379	16	-0.180249	0.0938636	-1.92033	0.0548369	0.15454
KEGG_SPHINGOLIPID_METABOLISM	Y	0.0178796	36	-0.0221589	0.0413936	-0.535321	0.592436	0.759953
KEGG_GLYCOSPHINGOLIPID_BIOSYNTHESIS_LACTO_AND_NEOLACTO_SERIES	Y	0.011706	22	0.00823693	0.0481796	0.170963	0.864255	0.917954
KEGG_GLYCOSPHINGOLIPID_BIOSYNTHESIS_GLOBO_SERIES	Y	0.00689534	12	0.0325678	0.0600889	0.541993	0.587832	0.759953
KEGG_GLYCOSPHINGOLIPID_BIOSYNTHESIS_GANGLIO_SERIES	Y	0.00737411	13	0.0540259	0.053204	1.01545	0.30991	0.519853
KEGG_PYRUVATE_METABOLISM	Y	0.0166243	34	-0.186317	0.0625382	-2.97926	0.00289444	0.0211851
KEGG_GLYOXYLATE_AND_DICARBOXYLATE_METABOLISM	Y	0.00694146	13	-0.4243	0.163489	-2.59528	0.00946137	0.0451235
KEGG_PROPANOATE_METABOLISM	Y	0.0142253	28	-0.128711	0.0611856	-2.10362	0.0354293	0.119018
KEGG_BUTANOATE_METABOLISM	Y	0.016056	32	-0.0872596	0.0523576	-1.66661	0.0956147	0.231224
KEGG_ONE_CARBON_POOL_BY_FOLATE	Y	0.00721255	13	-0.215258	0.104783	-2.05432	0.0399633	0.123886
KEGG_RIBOFLAVIN_METABOLISM	Y	0.00740023	13	-0.0278732	0.0699496	-0.398476	0.690286	0.797473
KEGG_NICOTINATE_AND_NICOTINAMIDE_METABOLISM	Y	0.00981851	18	-0.0421871	0.0619049	-0.681482	0.495578	0.703625
KEGG_PANTOTHENATE_AND_COA_BIOSYNTHESIS	Y	0.00739858	13	0.0279855	0.0587399	0.476431	0.633775	0.762993
KEGG_FOLATE_BIOSYNTHESIS	Y	0.0047959	8	-0.104315	0.107558	-0.969852	0.332137	0.541908
KEGG_RETINOL_METABOLISM	Y	0.0152511	30	0.0446529	0.0366219	1.21929	0.222753	0.418506
KEGG_PORPHYRIN_AND_CHLOROPHYLL_METABOLISM	Y	0.0102906	19	-0.042196	0.0605887	-0.696433	0.486169	0.703625
KEGG_TERPENOID_BACKBONE_BIOSYNTHESIS	Y	0.00737251	13	-0.0718508	0.0782813	-0.917854	0.358711	0.570259
KEGG_LIMONENE_AND_PINENE_DEGRADATION	Y	0.00583802	10	-0.101123	0.100684	-1.00436	0.31522	0.523491
KEGG_NITROGEN_METABOLISM	Y	0.0102835	19	-0.0502352	0.0618284	-0.812494	0.416522	0.640274
KEGG_SULFUR_METABOLISM	Y	0.00429636	7	-0.0149782	0.0917307	-0.163285	0.870297	0.917954
KEGG_AMINOACYL_TRNA_BIOSYNTHESIS	Y	0.0160019	32	-0.109806	0.0547962	-2.00389	0.045101	0.133155
KEGG_METABOLISM_OF_XENOBIOTICS_BY_CYTOCHROME_P450	Y	0.0152982	30	0.00765535	0.0413531	0.185122	0.853136	0.911973
KEGG_DRUG_METABOLISM_CYTOCHROME_P450	Y	0.0161718	32	-0.0013774	0.0412034	-0.0334293	0.973333	0.986834
KEGG_DRUG_METABOLISM_OTHER_ENZYMES	Y	0.0135143	26	-0.0266172	0.0493869	-0.538952	0.589929	0.759953
KEGG_BIOSYNTHESIS_OF_UNSATURATED_FATTY_ACIDS	Y	0.00978903	18	0.0556151	0.0451452	1.23192	0.218001	0.413757
KEGG_ABC_TRANSPORTERS	Y	0.0152994	30	-0.000294073	0.0424068	-0.00693456	0.994467	0.994467
KEGG_RIBOSOME	Y	0.014621	30	-0.292787	0.0811839	-3.60647	0.000311467	0.00413806
KEGG_RNA_DEGRADATION	Y	0.0228466	48	0.0238922	0.0310504	0.769466	0.44163	0.651929
KEGG_RNA_POLYMERASE	Y	0.0110223	21	-0.170336	0.0807402	-2.10968	0.0349034	0.119018
KEGG_BASAL_TRANSCRIPTION_FACTORS	Y	0.0152909	30	-0.0215948	0.0452224	-0.477526	0.632995	0.762993
KEGG_DNA_REPLICATION	Y	0.0133563	26	-0.124397	0.0629611	-1.97577	0.0482005	0.137928
KEGG_SPLICEOSOME	Y	0.0410917	97	-0.0693458	0.0288157	-2.40653	0.0161177	0.0697182
KEGG_PROTEASOME	Y	0.0137565	27	-0.141947	0.0667671	-2.12601	0.0335199	0.119018
KEGG_PROTEIN_EXPORT	Y	0.0121428	23	-0.0425836	0.0548369	-0.77655	0.437438	0.650907
KEGG_PPAR_SIGNALING_PATHWAY	Y	0.0248717	53	0.00614567	0.0312878	0.196424	0.844281	0.911973
KEGG_BASE_EXCISION_REPAIR	Y	0.011543	22	-0.135588	0.0717021	-1.89099	0.0586459	0.158089
KEGG_NUCLEOTIDE_EXCISION_REPAIR	Y	0.0165802	33	-0.0359141	0.0450229	-0.797685	0.425067	0.648053
KEGG_MISMATCH_REPAIR	Y	0.00834963	15	-0.0758496	0.0737327	-1.02871	0.303634	0.518128
KEGG_HOMOLOGOUS_RECOMBINATION	Y	0.00927697	17	-0.103854	0.075318	-1.37887	0.167957	0.339565
KEGG_NON_HOMOLOGOUS_END_JOINING	Y	0.00534662	9	-0.0601383	0.0930485	-0.646311	0.518089	0.71893
KEGG_MAPK_SIGNALING_PATHWAY	Y	0.0856434	238	0.0472772	0.0130459	3.6239	0.000291219	0.00413806
KEGG_ERBB_SIGNALING_PATHWAY	Y	0.0353678	82	0.0837152	0.0193019	4.33716	1.45e-05	0.000337932
KEGG_CALCIUM_SIGNALING_PATHWAY	Y	0.0601802	153	0.00837067	0.0183584	0.455958	0.648427	0.762993
KEGG_CYTOKINE_CYTOKINE_RECEPTOR_INTERACTION	Y	0.0699448	184	0.000397795	0.0171814	0.0231527	0.981529	0.986834
KEGG_CHEMOKINE_SIGNALING_PATHWAY	Y	0.059424	151	0.0323665	0.0171063	1.89208	0.0585007	0.158089
KEGG_PHOSPHATIDYLINOSITOL_SIGNALING_SYSTEM	Y	0.0314045	70	0.0318362	0.0250454	1.27114	0.2037	0.390678
KEGG_NEUROACTIVE_LIGAND_RECEPTOR_INTERACTION	Y	0.0757109	203	-0.013427	0.0170681	-0.786669	0.431489	0.650907
KEGG_CELL_CYCLE	Y	0.0423169	100	0.03055	0.0210763	1.44949	0.147223	0.307679
KEGG_OOCYTE_MEIOSIS	Y	0.0394386	92	0.0385872	0.0213965	1.80343	0.0713422	0.17932
KEGG_P53_SIGNALING_PATHWAY	Y	0.0259438	56	0.0502116	0.0262857	1.91022	0.0561249	0.15581
KEGG_UBIQUITIN_MEDIATED_PROTEOLYSIS	Y	0.0487744	119	0.0439255	0.0184698	2.37823	0.0174091	0.0719576
KEGG_SNARE_INTERACTIONS_IN_VESICULAR_TRANSPORT	Y	0.0170273	34	-0.0196069	0.0422624	-0.463933	0.642703	0.762993
KEGG_REGULATION_OF_AUTOPHAGY	Y	0.0117035	22	0.0149341	0.0471244	0.316908	0.751318	0.84694
KEGG_LYSOSOME	Y	0.0457789	110	-0.0393093	0.0248986	-1.57878	0.11441	0.256389
KEGG_ENDOCYTOSIS	Y	0.0617481	159	0.0524641	0.0155419	3.37564	0.000738434	0.00709284
KEGG_PEROXISOME	Y	0.0297631	66	-0.0729845	0.0353272	-2.06596	0.0388508	0.122479
KEGG_MTOR_SIGNALING_PATHWAY	Y	0.0234622	51	0.105349	0.0222808	4.72823	2.29e-06	0.000100047
KEGG_APOPTOSIS	Y	0.0318161	71	0.0195581	0.0258926	0.755357	0.450048	0.659125
KEGG_CARDIAC_MUSCLE_CONTRACTION	Y	0.0248288	53	-0.0383892	0.0358815	-1.06989	0.284687	0.499546
KEGG_VASCULAR_SMOOTH_MUSCLE_CONTRACTION	Y	0.0413227	97	0.008107	0.0230251	0.352095	0.724773	0.821998
KEGG_WNT_SIGNALING_PATHWAY	Y	0.0542685	136	0.0575216	0.0165482	3.476	0.000510494	0.00593449
KEGG_DORSO_VENTRAL_AXIS_FORMATION	Y	0.0116562	22	0.0524623	0.0412755	1.27103	0.203741	0.390678
KEGG_NOTCH_SIGNALING_PATHWAY	Y	0.019568	40	0.0176373	0.0346722	0.508687	0.61098	0.762993
KEGG_HEDGEHOG_SIGNALING_PATHWAY	Y	0.0232587	49	0.0185436	0.0312605	0.593195	0.55306	0.741275
KEGG_TGF_BETA_SIGNALING_PATHWAY	Y	0.0326879	74	0.0647366	0.0217804	2.97224	0.00296136	0.0211851
KEGG_AXON_GUIDANCE	Y	0.0476686	119	0.101872	0.0151628	6.71854	1.91e-11	3.55e-09
KEGG_VEGF_SIGNALING_PATHWAY	Y	0.0318082	71	0.0230301	0.0256367	0.898322	0.369029	0.58169
KEGG_FOCAL_ADHESION	Y	0.0684959	181	0.0584546	0.0143663	4.06888	4.75e-05	0.000981658
KEGG_ECM_RECEPTOR_INTERACTION	Y	0.0344494	78	-0.00139308	0.0264353	-0.0526978	0.957973	0.979028
KEGG_CELL_ADHESION_MOLECULES_CAMS	Y	0.0443787	106	0.0365253	0.0200334	1.82322	0.0682911	0.176419
KEGG_ADHERENS_JUNCTION	Y	0.0297239	67	0.0935697	0.020341	4.60006	4.26e-06	0.000132084
KEGG_TIGHT_JUNCTION	Y	0.0464093	112	0.0418308	0.0191813	2.18081	0.0292142	0.109677
KEGG_GAP_JUNCTION	Y	0.0335435	76	0.0510578	0.0225899	2.26021	0.0238237	0.0924015
KEGG_COMPLEMENT_AND_COAGULATION_CASCADES	Y	0.0254686	55	-0.0869004	0.039914	-2.17719	0.029483	0.109677
KEGG_ANTIGEN_PROCESSING_AND_PRESENTATION	Y	0.0195743	40	-0.00999646	0.037869	-0.263975	0.791803	0.876639
KEGG_RENIN_ANGIOTENSIN_SYSTEM	Y	0.00886965	16	0.0266215	0.0530917	0.501425	0.61608	0.762993
KEGG_TOLL_LIKE_RECEPTOR_SIGNALING_PATHWAY	Y	0.0329254	74	0.0257719	0.024841	1.03747	0.299534	0.515863
KEGG_NOD_LIKE_RECEPTOR_SIGNALING_PATHWAY	Y	0.0244645	52	-0.0177597	0.034016	-0.522099	0.601609	0.762993
KEGG_RIG_I_LIKE_RECEPTOR_SIGNALING_PATHWAY	Y	0.0240046	51	0.041606	0.0283154	1.46938	0.141753	0.299615
KEGG_CYTOSOLIC_DNA_SENSING_PATHWAY	Y	0.0178821	36	-0.019226	0.0410138	-0.46877	0.639241	0.762993
KEGG_JAK_STAT_SIGNALING_PATHWAY	Y	0.0472214	114	0.0190818	0.0205163	0.930081	0.352345	0.564967
KEGG_HEMATOPOIETIC_CELL_LINEAGE	Y	0.0287859	63	-0.00584027	0.0298071	-0.195935	0.844664	0.911973
KEGG_NATURAL_KILLER_CELL_MEDIATED_CYTOTOXICITY	Y	0.0376706	87	0.0333441	0.022389	1.4893	0.13643	0.295069
KEGG_T_CELL_RECEPTOR_SIGNALING_PATHWAY	Y	0.0417781	99	0.0554567	0.0194515	2.85102	0.00436425	0.0266292
KEGG_B_CELL_RECEPTOR_SIGNALING_PATHWAY	Y	0.030235	67	0.040138	0.0249211	1.6106	0.107289	0.255843
KEGG_FC_EPSILON_RI_SIGNALING_PATHWAY	Y	0.032579	73	0.0127276	0.026125	0.487182	0.626137	0.762993
KEGG_FC_GAMMA_R_MEDIATED_PHAGOCYTOSIS	Y	0.038717	90	0.039575	0.0215119	1.83968	0.0658369	0.172474
KEGG_LEUKOCYTE_TRANSENDOTHELIAL_MIGRATION	Y	0.0419861	99	0.0257465	0.0215155	1.19665	0.231465	0.430524
KEGG_INTESTINAL_IMMUNE_NETWORK_FOR_IGA_PRODUCTION	Y	0.0157366	31	-0.00232461	0.0419855	-0.0553671	0.955847	0.979028
KEGG_CIRCADIAN_RHYTHM_MAMMAL	Y	0.00736579	13	0.0597948	0.0520816	1.1481	0.250948	0.447471
KEGG_LONG_TERM_POTENTIATION	Y	0.0271782	60	0.0870096	0.022358	3.89166	0.000100022	0.00186042
KEGG_NEUROTROPHIN_SIGNALING_PATHWAY	Y	0.0472371	115	0.0600913	0.0178232	3.37152	0.000749579	0.00709284
KEGG_LONG_TERM_DEPRESSION	Y	0.029425	65	0.0494849	0.0246149	2.01036	0.0444118	0.133155
KEGG_OLFACTORY_TRANSDUCTION	Y	0.0254689	56	-0.170237	0.0515725	-3.30093	0.000966056	0.00855649
KEGG_TASTE_TRANSDUCTION	Y	0.0138352	27	-0.107038	0.0593047	-1.80488	0.071115	0.17932
KEGG_REGULATION_OF_ACTIN_CYTOSKELETON	Y	0.0709325	188	0.0406694	0.0149402	2.72215	0.0064938	0.0339545
KEGG_INSULIN_SIGNALING_PATHWAY	Y	0.0497443	122	0.0481442	0.0179857	2.6768	0.00744163	0.0364248
KEGG_GNRH_SIGNALING_PATHWAY	Y	0.037314	86	0.0322078	0.0226295	1.42327	0.154681	0.319673
KEGG_PROGESTERONE_MEDIATED_OOCYTE_MATURATION	Y	0.0316952	71	0.0491032	0.023474	2.09181	0.0364732	0.119018
KEGG_MELANOGENESIS	Y	0.0385796	90	0.0569519	0.0203106	2.80405	0.00505338	0.0284085
KEGG_ADIPOCYTOKINE_SIGNALING_PATHWAY	Y	0.0287043	63	0.040837	0.0255778	1.59658	0.110382	0.256389
KEGG_TYPE_II_DIABETES_MELLITUS	Y	0.0212207	44	0.0210601	0.032675	0.644532	0.519241	0.71893
KEGG_TYPE_I_DIABETES_MELLITUS	Y	0.0144061	28	-0.0260703	0.0474493	-0.549436	0.582715	0.759953
KEGG_MATURITY_ONSET_DIABETES_OF_THE_YOUNG	Y	0.0121572	23	-0.0255467	0.0522386	-0.489039	0.624822	0.762993
KEGG_ALDOSTERONE_REGULATED_SODIUM_REABSORPTION	Y	0.0185059	38	0.0798287	0.0285586	2.79525	0.00519296	0.0284085
KEGG_VASOPRESSIN_REGULATED_WATER_REABSORPTION	Y	0.0183129	37	0.00863017	0.0371301	0.23243	0.816207	0.898311
KEGG_PROXIMAL_TUBULE_BICARBONATE_RECLAMATION	Y	0.0102959	19	0.0308278	0.0481247	0.640583	0.521804	0.71893
KEGG_ALZHEIMERS_DISEASE	Y	0.0450066	108	-0.0554105	0.0264123	-2.09791	0.0359313	0.119018
KEGG_PARKINSONS_DISEASE	Y	0.0322662	74	-0.157638	0.0418471	-3.76699	0.000165903	0.00279662
KEGG_AMYOTROPHIC_LATERAL_SCLEROSIS_ALS	Y	0.0216439	45	0.00628807	0.0339282	0.185335	0.852969	0.911973
KEGG_HUNTINGTONS_DISEASE	Y	0.0487702	119	-0.0543508	0.0252615	-2.15153	0.0314514	0.114705
KEGG_PRION_DISEASES	Y	0.0135177	26	0.0200934	0.0426071	0.471598	0.637221	0.762993
KEGG_VIBRIO_CHOLERAE_INFECTION	Y	0.0230889	49	-0.0886231	0.0427759	-2.0718	0.0383025	0.122479
KEGG_EPITHELIAL_CELL_SIGNALING_IN_HELICOBACTER_PYLORI_INFECTION	Y	0.0287607	63	-0.0266707	0.0317178	-0.840877	0.400431	0.620669
KEGG_PATHOGENIC_ESCHERICHIA_COLI_INFECTION	Y	0.0211915	44	0.0356646	0.0311229	1.14593	0.251845	0.447471
KEGG_LEISHMANIA_INFECTION	Y	0.023673	50	0.00391972	0.0324368	0.120842	0.903818	0.939163
KEGG_PATHWAYS_IN_CANCER	Y	0.10166	295	0.0444662	0.0118704	3.74596	0.000180427	0.00279662
KEGG_COLORECTAL_CANCER	Y	0.0262085	57	0.0690114	0.0242071	2.85088	0.00436627	0.0266292
KEGG_RENAL_CELL_CARCINOMA	Y	0.0286299	64	0.0916976	0.0211186	4.34202	1.42e-05	0.000337932
KEGG_PANCREATIC_CANCER	Y	0.0292083	65	0.0757486	0.0221525	3.41941	0.000629353	0.00688586
KEGG_ENDOMETRIAL_CANCER	Y	0.0239935	51	0.044485	0.0280821	1.58411	0.113192	0.256389
KEGG_GLIOMA	Y	0.0257483	57	0.10668	0.0215946	4.94012	7.9e-07	4.9e-05
KEGG_PROSTATE_CANCER	Y	0.035999	84	0.0887835	0.0189096	4.69514	2.69e-06	0.000100047
KEGG_THYROID_CANCER	Y	0.0144105	28	0.018603	0.0412788	0.450668	0.652236	0.762993
KEGG_BASAL_CELL_CARCINOMA	Y	0.0244674	52	0.0140429	0.0307847	0.456165	0.648279	0.762993
KEGG_MELANOMA	Y	0.0291738	65	0.0788293	0.0221438	3.55988	0.000372255	0.00461597
KEGG_BLADDER_CANCER	Y	0.0190776	39	0.0499479	0.0314199	1.58969	0.111928	0.256389
KEGG_CHRONIC_MYELOID_LEUKEMIA	Y	0.0300966	67	0.0618541	0.0230705	2.68109	0.00734679	0.0364248
KEGG_ACUTE_MYELOID_LEUKEMIA	Y	0.0254408	55	0.0675587	0.0248542	2.7182	0.00657184	0.0339545
KEGG_SMALL_CELL_LUNG_CANCER	Y	0.0331416	75	0.0552791	0.0222899	2.48001	0.0131495	0.0611451
KEGG_NON_SMALL_CELL_LUNG_CANCER	Y	0.0237927	51	0.0767493	0.0251075	3.05683	0.00224115	0.017369
KEGG_ASTHMA	Y	0.00924217	17	-0.129049	0.0774569	-1.66607	0.0957216	0.231224
KEGG_AUTOIMMUNE_THYROID_DISEASE	Y	0.0130642	25	-0.0270899	0.0503271	-0.538277	0.590394	0.759953
KEGG_SYSTEMIC_LUPUS_ERYTHEMATOSUS	Y	0.0246194	53	-0.103162	0.0420088	-2.45573	0.014072	0.0638388
KEGG_ALLOGRAFT_REJECTION	Y	0.0116547	22	-0.0683901	0.0597768	-1.14409	0.252605	0.447471
KEGG_GRAFT_VERSUS_HOST_DISEASE	Y	0.0107656	20	-0.0339412	0.0573481	-0.591846	0.553964	0.741275
KEGG_PRIMARY_IMMUNODEFICIENCY	Y	0.0144147	28	0.0119843	0.0421965	0.284012	0.776405	0.864739
KEGG_HYPERTROPHIC_CARDIOMYOPATHY_HCM	Y	0.0319016	72	0.0691445	0.0218817	3.15993	0.00158144	0.0133703
KEGG_ARRHYTHMOGENIC_RIGHT_VENTRICULAR_CARDIOMYOPATHY_ARVC	Y	0.0293108	65	0.0652377	0.0231514	2.81787	0.00484116	0.0281393
KEGG_DILATED_CARDIOMYOPATHY	Y	0.0333567	76	0.0712133	0.021152	3.36674	0.000762671	0.00709284
KEGG_VIRAL_MYOCARDITIS	Y	0.0240624	51	0.0183675	0.030655	0.599166	0.549072	0.741275

## Sheet: mirnascore
miRNA	S_mirna
mmu-miR-let-7f-5p	-1.46852
mmu-miR-1a-5p	-1.4318
mmu-miR-1b-5p	-3
mmu-miR-7a-5p	-0.847712
mmu-miR-9-3-5p	-1.1549
mmu-miR-10b-5p	-2.22185
mmu-miR-15a-5p	-0.0644927
mmu-miR-15b-5p	-0.240332
mmu-miR-16-3p	-1.31876
mmu-miR-17-5p	-0.4698
mmu-miR-18a-3p	-1.92082
mmu-miR-20a-5p	-2.04576
mmu-miR-21a-3p	-1.55284
mmu-miR-22-5p	-1.49485
mmu-miR-23a-5p	-1.5376
mmu-miR-26a-5p	-0.958607
mmu-miR-27a-5p	-2.30103
mmu-miR-28-5p	-0.0315171
mmu-miR-29a-5p	-2.30103
mmu-miR-30a-5p	-0.363512
mmu-miR-30c-5p	-0.37366
mmu-miR-30d-5p	1.03152
mmu-miR-30e-5p	-1.09151
mmu-miR-32-5p	-1.14874
mmu-miR-33a-5p	-0.707744
mmu-miR-34a-5p	-1.85387
mmu-miR-34c-5p	-1.65758
mmu-miR-96-5p	-0.195861
mmu-miR-99b-5p	-2.22185
mmu-miR-106b-5p	-2.69897
mmu-miR-124-3-5p	-0.528708
mmu-miR-125a-5p	-3
mmu-miR-127-5p	-0.501689
mmu-miR-129-1-5p	0.521434
mmu-miR-130b-5p	-0.782516
mmu-miR-132-5p	-0.474955
mmu-miR-133a-5p	-0.504456
mmu-miR-133b-5p	-0.896196
mmu-miR-134-5p	-1.42022
mmu-miR-137-5p	-3.39794
mmu-miR-139-5p	-1.39794
mmu-miR-142b-5p	-1.67778
mmu-miR-144-5p	0.0177288
mmu-miR-145a-5p	-1.3279
mmu-miR-147-5p	-0.16813
mmu-miR-152-5p	-1.67778
mmu-miR-181a-5p	-1.88606
mmu-miR-181a-3p	0.21254
mmu-miR-185-5p	-1.58503
mmu-miR-186-5p	-1.02687
mmu-miR-190a-5p	-0.876148
mmu-miR-191-5p	-1.85387
mmu-miR-193a-5p	-1.07058
mmu-miR-193b-5p	-1.82391
mmu-miR-195-5p	-0.347754
mmu-miR-196a-5p	-1.58503
mmu-miR-199a-5p	-1.0655
mmu-miR-210-5p	0.38934
mmu-miR-214-5p	-2.22185
mmu-miR-216a-5p	0.987163
mmu-miR-218-5p	-0.350665
mmu-miR-219a-5p	-1.55284
mmu-miR-222-5p	-0.501689
mmu-miR-299-5p	-0.838632
mmu-miR-335-5p	-1.72125
mmu-miR-361-5p	-0.0472076
mmu-miR-362-5p	0.152427
mmu-miR-365b-5p	-0.761954
mmu-miR-375-5p	1
mmu-miR-377-5p	-1.07572
mmu-miR-379-5p	-0.987163
mmu-miR-381-5p	-1.39794
mmu-miR-409-5p	-0.091515
mmu-miR-411-5p	-0.318759
mmu-miR-425-5p	-3
mmu-miR-429-5p	-0.966576
mmu-miR-452-5p	-0.488117
mmu-miR-483-5p	0.267606
mmu-miR-485-5p	0.172631
mmu-miR-491-5p	0.0520764
mmu-miR-500a-5p	-0.305395
mmu-miR-590-5p	-0.333482
mmu-miR-615-5p	0.590067
mmu-miR-874-5p	-0.251812
mmu-miR-876-5p	-1.67778

## Sheet: mrnascore
EntrezID	S_mrna
10	3.01233
100	3
1000	8.87481
10000	22.0186
10001	1.72125
10002	6.07263
10003	1.28421
100037417	0.609885
10005	3.58979
10006	8.16339
10007	1.94196
10008	1.67857
10009	2.08672
1001	3.45937
10010	7.84272
100113407	12.1783
100125288	-0.0520764
100127206	4.03848
100128071	0.350665
100128327	3
100128731	3.45961
100128927	1.0655
100129361	4.49861
100129480	0.675277
100129518	6.28489
100129583	3.4389
100129669	1.3279
100129924	5.74556
100129969	1.87111
10013	1.50515
100130519	2.30103
100130613	0.782516
100130742	1.42022
100130827	3.46183
100130958	1.49485
100130988	1.49485
100131017	0.26341
100131137	1.02687
100131211	3.01902
100131244	2.60727
100131390	14.7019
100131439	13.4699
100131801	1.7487
100131897	9.9214
100132463	5.21453
100132916	1.58503
100132994	1.55284
100133941	3.18177
10014	5.26381
100141515	1.02687
10015	4.88606
10016	2.76861
10017	1.3279
100170765	-0.10522
100170841	3.12336
10018	21.0497
100188893	7.4593
10019	4.30163
100190949	4.03542
1002	8.26689
10020	1.83778
10023	4.85939
10026	0.587081
100271715	2.68782
100272147	6.22936
100287171	2.31101
100287284	0.782516
100287362	1.72125
100287898	0.675277
100288637	3.31338
100288687	0.16813
100288797	7.96824
100288801	1.89443
100288814	1.51499
1003	6.43942
100316904	2.30103
10036	0.240332
100379661	6.14284
10038	0.0472076
100381270	8.77123
10039	4.61982
10042	6.97722
10043	2.92138
10044	-0.0520764
10046	4.22193
10048	4.5823
1005	1.52376
100505478	-0.967024
100505585	-0.319683
100505724	1.3494
100505741	3.84771
100505753	1.14874
100505876	-0.108138
100505984	7.91817
100506144	1.42022
100506403	22.5615
100506658	6.92666
100506742	10.3283
100507050	1.49941
100507290	2.07488
100507341	-0.172631
100507424	6.6815
10051	5.11205
10052	5.34256
100526760	3.35902
100526771	1.49485
100527943	1.21625
100527978	4.22316
100528062	0.195861
100529144	6.10326
10053	3
100533183	2.781
10054	5.42438
10055	-0.590067
10056	1.74819
10057	7.45433
10059	4.84372
1006	9.1825
10060	2.78589
10061	9.24522
10063	0.0472076
100652748	3.94409
100652824	5.7333
10066	7.9911
10067	4.88278
10068	3.51145
10069	2.03364
1007	6.27409
10072	8.72598
10073	1.90302
10075	10.6149
10076	6.93324
10077	0.285282
10078	0.807873
1008	5.63499
10081	2.97306
10082	21.3212
10083	1.50077
10084	2.04096
10085	13.7344
10086	3.84771
10087	7.90415
100885850	0.782516
1009	5.48717
10090	6.54074
10092	5.47259
10093	3.79029
10094	-0.152427
10095	2.88851
10096	5.5025
10097	8.38172
10098	5.63197
10099	7.04964
100996939	9.65429
101	1.58503
1010	2.11298
10100	9.11838
10103	3
10105	-0.0272741
10106	7.19523
101060399	2.51556
10107	2.59632
10109	3.20327
10110	2.65053
10112	0.501689
10113	2.87509
10114	13.4162
10116	5.7473
10117	3.17005
1012	1.88606
10120	0.99496
10121	14.9731
10123	7.52722
10124	9.97182
10125	1.95145
10126	2.82737
10127	8.1442
10128	0.958607
10129	1.95526
1013	1.67778
10130	10.8059
10131	1.0655
10133	2.81816
10134	3.54216
10135	12.6292
10136	-0.590067
10137	5.95337
10138	3.4477
10139	3.93087
10140	2.49772
10142	3.62813
10143	0.0472076
10144	8.6532
10146	1.44515
10148	1.27737
10149	8.29591
1015	5.56038
10150	6.65062
10152	10.445
10153	7.68575
10154	9.29529
10158	3.22201
10159	4.10791
10160	2.78798
10161	3.00524
10162	1.78089
10163	6.48348
10164	3.81978
10165	1.88595
10166	4.31344
10169	5.22457
1017	1.4124
10170	11.3291
10171	1.51328
10174	1.92286
10175	6.01804
10178	15.651
10179	11.3994
10180	3.21775
10181	1.89443
10184	14.0255
10186	1.13981
10188	0.823174
10189	1.58503
1019	2.59845
10190	1.3548
101927446	2.08836
101928143	0.500685
101928147	4.18425
101928168	1.88606
101928583	5.73377
101928601	6.3279
101928882	3.45354
101929469	-0.172631
101929726	3.02059
10193	4.94582
101930123	10.5872
10194	5.88183
10195	3.9844
10196	2.89459
10197	4.24192
10198	9.3654
10199	2.89744
102	11.9059
1020	0.737835
10200	8.45999
10201	2.07364
10203	9.09997
10204	1.18818
10205	6.53281
10206	-0.987163
10207	9.4314
10208	5.12475
10209	3.06725
10210	5.78405
10211	0.195861
10213	2.36552
10215	3.53251
10217	9.85131
10218	4.96592
10219	3.00524
1022	17.9262
10220	4.14874
10221	8.18742
10223	3.43681
10225	4.79899
10228	6.49035
10231	2.36102
10233	0.0783388
10234	0.79717
10236	7.41217
10238	6.93915
10239	11.9232
1024	9.7803
10241	1.3279
10242	5.39581
10243	1.40383
10244	5.34381
10245	2.22185
10246	4.93649
10247	1.02687
10248	1.72125
1025	7.80624
10250	2.17561
10251	2.04973
10252	5.89431
10253	2.65848
10254	6.62176
10256	-0.172631
10257	10.4162
1026	11.0891
10260	10.4331
10261	0.814532
10262	0.664262
10265	4.92082
10266	0.466719
10267	0.470229
10268	-0.590067
10269	5.23848
1027	6.02115
10270	4.02364
10272	2.27723
102723475	4.52394
102724159	-0.590067
102724197	1.99654
102724229	1.96901
10273	0.240332
10274	17.8463
10276	4.13974
10277	9.21766
10278	1.8018
10279	2.98297
1028	4.60811
10280	1.58503
10282	3
10283	2.30103
10284	8.98253
10285	2.54363
10286	1.88632
10287	2.82737
10289	1.195
10290	7.55411
10291	8.09945
10293	-0.590067
10294	9.71849
10295	7.31532
10296	1.78089
10297	0.770253
10298	0.501689
10299	13.1978
103	4.56039
10300	2.04922
10302	1.92082
10308	3.96658
10309	0.091515
10311	0.795635
10312	1.91321
10313	7.76606
10314	8.83008
10317	12.9175
10318	1.08771
10319	-0.590067
10320	9.15167
10322	2.68549
10324	2.43985
10325	3.48611
10327	5.5938
10328	0.635242
10331	4.34586
10335	2.02409
10336	5.53815
10342	7.2541
10343	-1.15979
10345	1.23469
10350	5.63095
10351	3.13787
10352	2.27045
1036	4.62176
10362	-0.642143
10363	17.084
10365	1.93545
10367	8.51052
10368	3.19723
10369	7.92455
10370	6.53926
10371	7.70262
10379	4.57238
10381	3.45937
10382	4.2817
10383	-0.267606
10388	4.87002
10389	10.4867
10390	3.9748
10391	9.45393
103910	1.15261
10392	3.5097
10393	5.42996
10395	9.55613
10396	4.17641
10397	9.17184
10398	-0.0520764
104	12.4559
1040	3.07572
10400	2.88074
10401	1.88606
10402	3.48812
10403	2.30103
10404	3.80582
10406	1.58503
10407	3.16663
10409	2.44151
1041	5.84801
10410	7.48158
10411	1.58503
10412	2.33279
10413	4.35941
10417	4.80744
10418	3.39109
10420	4.22141
10421	9.25643
10422	1.92082
10423	2.40402
10424	1.4603
10425	7.72037
10426	8.70688
10427	3.6993
10428	0.16813
10430	3.13787
10432	2.70341
10434	0.304825
10435	3.81627
10437	-0.172631
10438	6.12487
10439	10.4736
1044	3.40249
10440	1.39794
10443	12.8749
10444	3.96735
10445	-0.172631
10446	2.31211
10447	8.00845
10449	3.51145
1045	-0.492313
10450	0.304825
10451	8.39768
10452	0.488117
10454	3.11724
10455	1.42022
10456	3.84493
10457	0.737835
10458	7.81493
1046	1.72125
10460	0.987163
10461	3.04721
10463	2.55269
10464	2.35655
10466	3.99174
10468	7.95414
10469	2.30103
1047	1.98548
10472	19.6387
10473	0.99496
10474	4.8712
10476	1.58503
10477	12.1661
10478	2.83261
10479	3.77591
10480	0.876148
10481	0.513128
10483	3.0982
10484	2.57806
10486	3.17815
10487	2.56411
10488	0.847712
10489	2.70997
10490	0.0644927
104909134	4.93167
10491	5.03867
10492	22.8682
10493	6.3332
10494	2.20405
10495	9.77333
10497	3.59775
10498	13.5067
10499	5.56961
105	6.69217
1050	2.06832
10501	0.505692
10505	10.0752
10507	9.92907
10509	15.0092
1051	1.85387
10512	11.1294
10513	7.35848
10516	7.01806
10517	2.57398
10519	1.55284
10521	7.60998
10525	4.94757
10526	5.39171
10527	4.08796
10528	0.304825
10531	0.876148
10533	9.98685
10535	4.58503
10536	2.1359
105369239	0.83015
105369240	0.318759
105369247	6.35742
10537	1.3279
105375355	4.36032
105376430	0.79717
10538	1.39794
10539	1.88606
1054	3.18046
10540	2.08714
10541	2.88074
10542	1.42022
10544	1.15702
10548	1.90379
10549	3
10550	5.13684
10551	1.39794
10552	3
10553	2.07314
10554	5.09439
10555	0.782516
10556	4.93167
10558	1.36512
10559	7.50815
1056	1.91851
10560	6.14778
10561	7.98241
10563	4.02237
10564	8.59025
10565	3.62221
10566	-0.0520764
10567	1.58503
10568	5.04071
10569	0.597864
10570	4.93167
10574	0.333482
10575	2.56896
10577	8.89775
10579	1.14874
1058	6.76737
10580	9.64584
10584	13.4707
10585	2.51656
10586	1.71085
10587	-0.172631
10588	1.72499
1059	0.196639
10590	2.70841
10591	4.26381
10592	7.91918
10598	-0.0520764
10600	4.47803
10602	3.5641
10605	5.51774
10606	1.7418
10608	4.15812
10609	1.49485
10610	5.21453
10611	10.3602
10612	7.75203
10613	7.9037
10614	8.86918
10616	3.33882
10617	1.39794
10618	14.4146
1062	1.88606
10620	9.89319
10621	11.2717
10622	10.6534
10623	5.04206
10625	10.5573
10627	1.63223
10628	9.94942
10629	2.30103
1063	11.1013
10630	4.93262
10631	0.488117
10632	1.61845
10633	1.93569
10634	2.09025
10635	2.3822
10636	-0.172631
10640	9.92973
10641	3
10642	15.5744
10643	5.80316
10644	4.27058
10645	7.73428
10650	5.45693
10651	4.52498
10652	5.92776
10653	3.45364
10654	0.958607
10655	4.83122
10656	3.71056
10657	4.79779
10658	9.93807
10659	25.525
1066	5.94564
10660	0.881135
10661	2.35786
10663	4.54163
10664	2.23532
10665	1.09136
10666	0.958607
10667	1.3279
10668	3.35067
10669	3
10670	2.12053
10671	0.894919
10672	5.17938
10677	1.18302
10678	3.17883
10681	8.44645
10682	4.80156
106821730	2.33085
10687	9.18354
1069	1.51499
10690	14.5695
10691	3.00983
10692	2.84757
10693	3
10694	1.92082
10695	3.66221
10699	13.4511
107	21.503
1070	5.34824
107080638	3
10712	5.02344
10713	-0.267606
10714	2.50872
10716	0.966113
10717	0.37366
10718	1.67332
1072	0.195861
10721	11.0569
10723	8.22653
10724	10.1631
10725	29.9895
10726	2.1486
10728	2.91293
1073	10.3261
10730	3.88845
10732	0.207103
10733	1.93326
10734	3.51145
10735	10.9554
10736	4.26672
10741	3.16648
10742	3.95861
10743	1.31742
10745	3.31001
10746	22.0367
10747	3
10749	10.2557
1075	3.58999
10750	2.98845
10752	21.9767
10753	3.09018
10755	2.47221
10758	3.44938
10762	8.64255
10763	-0.0520764
10765	2.27479
10766	14.8947
10767	2.72666
10768	6.38973
10769	0.962775
10771	15.7133
10772	8.97535
10773	10.79
10776	16.7225
10777	6.6716
10782	7.17058
10783	3.24254
10785	1.88985
10786	4.23311
10787	3.14664
10788	7.76064
10791	2.46824
10797	-0.0520764
107984640	-0.590067
107984923	3.02848
107987479	8.11532
107987560	0.847712
107987561	1.111
10799	4.0002
108	5.54801
1080	3.38362
10800	3.49598
10801	6.80978
10802	9.4142
10803	7.05403
10804	-0.590067
10806	0.37366
10807	2.15076
10808	9.97857
10809	-0.590067
1081	4.92385
10810	3.63686
10811	0.488117
10813	-0.642143
10814	5.24813
10815	2.56266
10816	-0.590067
10817	-0.271308
10818	18.6145
10825	3.14146
10827	4.58503
10838	6.00809
10840	2.40993
10841	2.65053
10842	1.60083
10844	-0.987163
10845	1.54584
10846	13.1813
10847	5.29942
10848	0.942883
10849	5.41981
10855	5.42424
10857	8.1491
10858	1.58503
10861	-0.0811157
10863	1.26337
10864	1.3279
10865	6.81075
10867	15.4513
10868	2.64767
10869	3.21802
1087	6.46978
10871	6.66873
10873	3.55366
10874	-0.499046
10875	2.85223
10882	-0.590067
10884	1.53295
10885	4.44262
10886	-0.285242
10887	7.84754
10888	7.44611
1089	3.00524
10890	12.61
10891	6.43119
10892	3.99419
10893	11.6493
10894	2.22241
10898	2.98297
10899	2.51556
109	1.14874
10900	1.24759
10901	2.30103
10902	4.74734
10903	0.930771
10904	4.00144
10905	10.4967
10907	4.19523
10908	1.37033
10910	1.24981
10912	1.06751
10913	6.33065
10914	20.6391
10915	4.93557
10919	5.52491
10920	0.942883
10921	2.16977
10922	7.0684
10923	9.25277
10924	0.847712
10926	6.61608
10927	8.6245
10928	5.82925
10933	9.84728
10936	0.091515
10938	3.45006
10939	9.71893
10943	1.0655
10944	2.55063
10945	1.91711
10946	1.88606
10947	3.56254
10949	1.14874
10950	6.61247
10951	-0.172631
10952	3.17718
10953	0.910699
10955	7.73418
10956	2.42062
10957	5.11122
10959	2.78265
10960	6.29199
10961	-0.421937
10962	8.60537
10964	2.0438
10965	4.51097
10969	7.82887
10970	1.84267
10971	9.92224
10972	4.51404
10973	2.11781
10975	5.3934
10978	3.45961
10979	0.809281
10981	1.23397
10982	9.57927
10983	4.82814
10987	1.72125
10988	5.02473
10989	6.12293
10990	2.12354
10991	0.727354
10992	3.21782
10993	5.22694
10994	1.42022
10998	3.21396
10999	8.58459
11001	0.488117
11004	3
11005	7.38546
11007	10.2705
11009	0.99496
1101	1.68124
11010	0.350665
11011	10.7804
11013	0.16813
11014	4.22273
11016	6.15398
11017	0.847712
11018	1.58503
1102	6.92607
11021	3.58268
11022	6.07988
1103	3.76064
11030	2.24175
11031	4.51883
11033	0.99496
11034	2.76221
1104	-0.306281
11040	8.51949
11041	1.0655
11043	10.476
11044	7.09451
11045	0.845874
11046	6.08774
1105	4.66871
11051	1.39794
11052	11.0857
11054	5.92138
11055	3.11724
11056	3.0202
11057	12.0804
11059	6.30872
1106	9.1451
11060	5.60307
11061	2.51556
11062	-0.172631
11063	2.40993
11064	4.73363
11065	0.896196
11066	0.847712
11068	2.40993
11069	11.3121
1107	1.7906
11070	0.195861
11072	1.67778
11073	5.82275
11074	0.912204
11075	9.44
11076	17.5397
11078	2.50669
1108	1.48553
11080	11.9572
11081	0.876148
11082	6.31129
11083	10.4107
11086	1.85387
11091	1.0655
11093	1.58503
11094	5.57944
11095	7.29116
11096	11.4892
11097	4.69121
11098	4.82598
11099	9.00738
111	1.40156
11100	5.21715
11101	9.34977
11102	7.29185
11103	5.30432
11104	1.07408
11108	3.21775
1111	7.04975
11112	0.0472076
11113	2.34256
11116	2.87647
11117	-0.0520764
11119	4.39794
1112	-0.602434
11120	5.65793
11122	4.45329
11123	14.7429
11124	15.3693
11126	2.74328
11127	3.49875
11128	2.25839
11129	0.304825
1113	3.0348
11130	2.04734
11131	1.53295
11132	2.28651
11135	-0.642143
11136	1.14874
11137	2.22185
11138	2.48572
1114	1.49485
11140	8.22552
11141	8.42039
11142	1.90217
11143	10.3507
11144	3.20756
11145	3.89106
11146	4.14655
11149	1.67778
11151	-0.0520764
11153	6.4208
11155	9.7206
11156	4.98804
11157	11.933
11158	6.99009
1116	-0.0520764
11160	2.79638
11161	4.35916
11163	5.05419
11164	6.10791
11165	-0.762698
11166	3.8962
11167	2.0356
11168	4.35636
11169	-1.11259
11170	7.55045
11171	3.34824
11173	2.86931
11174	2.65104
11176	11.5796
11177	2.68323
11179	1.3279
1118	0.876148
11180	1.08771
11181	4.77555
11182	5.61787
11183	6.41597
11185	1.42022
11186	8.96614
11187	3.00524
11188	6.54069
11189	7.26179
1119	10.7475
11190	0.143784
11193	1.39794
11196	7.51556
11197	8.26849
11198	7.37559
11199	3
112	7.34074
11200	5.21453
11201	1.67778
1121	6.91407
11211	5.47586
11212	13.7977
11213	3.69893
11214	10.5893
11215	3.10015
11216	7.55849
11217	8.4601
11218	1.07058
11219	0.504456
1122	5.5208
11221	5.98249
11222	6.96823
11226	6.76909
11227	4.7879
11228	10.6485
1123	10.5008
11230	2.78106
11231	6.55527
11232	-0.38934
11234	14.777
11235	7.20311
11236	2.15526
11237	13.9049
11238	3.56748
112399	8.37819
11240	3.29725
112401	19.5631
11243	1.53295
11244	9.82489
11245	7.85912
112464	1.85387
11247	1.21173
112479	6.82057
11248	2.06046
112483	2.36754
112487	9.04453
11249	8.00988
112495	1.58503
11250	6.84576
11251	3.57512
11252	4.9135
11253	7.63885
11254	0.4698
11255	2.269
112574	6.8816
11258	2.22185
11259	0.79717
11260	2.84043
11261	8.01474
112611	0.240332
112616	-0.172631
11262	3.33814
11264	1.47649
11269	9.06365
11270	6.83398
112724	7.09568
11273	4.58503
11275	12.4081
112755	0.916554
11276	7.81123
112770	-0.172631
11278	16.8744
11279	11.9009
1128	1.51274
11280	-0.172631
112802	1.86201
11281	11.843
112812	-0.152427
112817	0.987163
11282	1.0655
11284	1.9617
112840	2.22185
112849	5.45486
11285	2.02607
112858	6.15303
112869	3.51145
112885	5.99923
1129	6.36327
112936	8.09158
112937	0.876148
112939	2.45493
112942	1.67778
112950	2.19088
112970	3.38603
113	7.92298
1130	2.95156
113000	1.62916
113026	8.81248
11309	6.10146
1131	0.0677014
113115	0.449613
11313	3.99496
113130	1.82536
11316	-0.498552
11317	2.84757
113174	1.58503
11319	0.626408
1132	-0.0520764
11320	20.9625
113201	10.2001
11321	1.73742
11322	1.27868
113220	1.71096
113230	0.847712
113235	4.49301
113246	0.304825
11325	2.40993
113251	4.87039
11326	4.10075
113263	6.17948
113277	-1.48571
113278	1.8413
11328	3.92702
11329	10.1353
11331	1.52019
11332	1.42022
11333	3.45469
11334	5.0419
11335	2.6548
11336	2.13977
11337	1.53295
11338	0.770253
11339	1.72499
1134	10.8859
113402	1.71343
11341	0.116054
113419	2.17585
11342	10.1151
11343	10.4609
113444	3.84771
11345	1.75141
113451	6.68022
113457	0.745093
11346	9.17808
1135	2.72584
113510	3.84309
1136	5.26641
113655	1.93569
1137	7.31001
113791	4.75499
1138	-0.000923858
113802	1.42022
113828	3.78014
113829	3.99496
113878	2.56114
114	1.92082
1140	0.501689
114034	0.488117
114088	15.0305
1141	11.8329
114112	-1.44504
114131	-0.590067
114134	7.23991
1142	9.28919
114294	7.17599
114299	10.9709
1143	4.58539
1144	-0.642143
114548	5.44096
114569	7.14745
114571	5.74178
114609	1.94784
114625	3.12688
1147	5.77613
114757	1.55618
114770	0.488117
114781	1.42022
114783	1.69251
114784	2.30103
114785	3.89747
114786	9.53277
114787	2.95317
114788	11.5803
114789	8.19076
114790	2.96033
114791	7.4259
114792	2.6119
114793	6.64995
114794	4.3534
114795	2.57251
114798	3.7445
114799	5.06205
114800	4.53832
114801	8.29005
114803	6.94812
114804	0.79717
114805	14.258
114815	9.93127
114818	9.53553
114823	5.88655
114825	6.86859
114826	2.60585
114836	10.0645
114876	4.97475
114879	7.68642
114880	3.62085
114881	3.72735
114882	10.9626
114883	8.59693
114885	4.44271
114897	6.30805
114898	1.98261
114899	1.58503
1149	1.42022
114900	1.58503
114904	2.82774
114905	8.85401
114907	11.4409
114908	10.6021
114926	5.27902
114932	0.795635
114984	1.83425
114990	1.41942
114991	1.42022
115004	10.1557
115019	3.88153
115024	3.26627
115106	2.22185
115111	1.67778
115123	1.26381
1152	2.30103
115201	3.22654
115207	-0.590067
115209	1.85387
115265	3.62825
115286	1.58503
115290	1.8018
115294	3.48643
115330	6.6729
115350	-0.191527
115353	3
115361	8.41146
115399	3.99957
1154	3.052
115416	0.350665
115426	8.53537
1155	-0.987163
115509	5.86391
115548	12.696
115557	1.92082
115560	10.0299
115584	2.19511
115650	1.81276
115704	6.07041
115708	-0.204504
115727	3.47582
115749	5.7403
115752	4.02687
115761	1.06751
115795	0.782516
115817	0.686132
115827	11.8446
115861	6.26212
115908	0.79717
115948	2.22185
115950	1.76159
115992	1.88606
116	6.60553
1160	1.58503
116028	1.58503
116039	2.49573
116064	9.59245
116068	12.3958
116071	3.18177
116092	1.07058
1161	4.52288
116113	5.66566
116115	2.50669
116138	0.942883
116143	1.92157
116150	5.55894
116151	9.89038
116154	12.8115
116159	14.514
116224	2.19088
116225	3.63808
116236	-0.616536
116238	1.85387
116254	5.91484
116255	1.58503
116285	-0.590067
1163	0.4698
116328	5.79727
116337	0.996314
116372	7.53316
116379	4.76948
1164	0.958607
116442	2.17561
116443	3.24872
116448	1.53295
116449	-0.0520764
116496	9.23334
116512	2.86931
116519	4.31045
116534	6.92007
116535	0.205568
116540	-0.590067
116541	2.08672
116832	-0.590067
116835	6.51669
116840	7.87403
116841	-0.590067
116842	0.782516
116843	4.85972
116844	-0.204504
116931	15.1766
116966	3
116969	3.9748
116983	4.36811
116984	6.2414
116985	6.93879
116986	3.94288
116987	12.4756
116988	2.40993
117	3.59857
117143	0.0394386
117145	4.04823
117154	7.5138
117155	3.87795
117156	2.22185
117178	14.3636
117247	6.44668
117248	0.488117
117283	2.33477
117286	1.85387
117289	5.02925
1173	1.26534
1174	1.53295
1175	1.07058
117531	3.15326
117532	3.33818
117581	4.75374
117583	11.9338
117584	7.38274
1176	10.1742
117608	9.44894
117854	7.11137
1179	0.847712
118	7.38954
1180	2.70597
1181	3.73684
1182	6.98908
1183	3.24112
1184	2.85822
118424	2.3623
118427	17.7478
118429	10.4846
118442	-0.285242
118461	1.46742
118472	3.3279
118487	-0.0520764
1185	2.40055
118611	1.58503
118663	7.34149
118670	1.55284
118672	2.30938
118738	13.3621
118788	2.51556
1188	0.304825
118812	5.90435
118813	11.9971
118856	0.488117
118881	4.50523
118924	3
118932	4.39051
118980	4.14625
118987	5.7193
119	5.02318
119032	1.53295
1191	-0.642143
119391	1.90108
119392	7.34723
119467	2.98297
1195	5.92709
119504	8.96702
119559	6.52424
119587	4.45606
1196	10.3054
119679	-0.668005
119695	0.195861
119710	1.64952
1198	1.49941
12	4.28854
120	5.27934
1200	6.45181
120071	3.17263
1201	4.18709
120103	3.01994
120114	16.8188
120224	1.39898
120237	3.11724
1203	6.69406
120406	2.72028
120425	4.85724
120526	6.2414
120534	2.91439
1207	3.77046
120892	2.17471
1209	3.56839
120935	4.01911
120939	1.94426
121006	0.79717
121053	11.5753
1211	1.72097
1212	0.795635
121214	2.36047
121227	-0.440237
121260	6.7292
121268	3.79717
121274	8.09648
121275	3.51145
1213	9.86212
121340	5.55896
121355	-0.152427
121441	2.53194
121457	4.03856
1215	3.8187
121512	16.7123
121536	7.82268
121549	-0.267606
121551	6.5639
121599	0.488117
121601	1.14783
121643	7.63726
121665	1.31045
122011	16.1815
122042	5.0444
122046	0.0472076
122060	2.79219
122402	2.30103
122416	4.98982
122481	3.00524
122525	0.80618
122553	4.29209
122616	-0.590067
122618	0.397096
122664	2.30103
122706	8.89477
122748	2.04576
122769	2.7849
122773	2.14303
122786	9.47842
122809	1.98548
122830	14.3136
122876	4.50299
122953	1.95571
122961	1.4603
122970	1.13118
123	-0.590067
1230	1.3279
123016	11.6308
123036	1.22273
123041	4.16474
123096	-0.762698
123099	0.304825
123169	-0.987163
1232	5.08392
123207	2.4299
123228	-0.502749
123263	0.958607
1233	3.17005
123355	15.9491
1235	1.65758
123591	0.822329
1236	2.57999
123606	0.595971
123624	1.3279
123688	14.0187
123720	3.14986
123745	3.16984
123775	3.61939
1238	1.35036
123803	1.22724
123811	0.350665
123872	2.71621
123879	14.0516
123920	1.67786
124	1.80557
1240	-0.0520764
124044	4.40501
124045	-0.172631
124056	1.3279
1241	1.92082
124152	-0.176091
124220	1.58503
124222	2.64615
124245	1.02687
124359	7.46023
1244	6.04938
124401	1.6257
124404	-0.152427
124446	1.49485
124454	0.99496
124512	7.43828
124535	7.87886
124540	14.2047
124565	5.31851
124583	3.33882
124590	4.71378
124599	2.19047
124602	2.43316
124641	1.15261
124739	3.27193
124790	-0.590067
124801	3.76186
124808	3.4477
124817	6.59393
124842	2.94792
124872	3.33629
124923	-0.152427
124925	7.53539
124930	6.50432
124935	4.13067
124936	4.9017
124975	3.42366
124995	1.6257
124997	1.02687
125058	3
125061	-0.224707
125113	8.55268
125150	2.1284
125170	0.143784
125206	7.43638
125228	11.0162
125336	2.76853
125704	-0.525574
125931	12.373
125950	5.12877
125958	1.90379
125965	0.304825
125972	-0.590067
125981	9.86718
125988	-0.590067
1260	-0.590067
126003	0.504456
126014	5.98323
126074	-0.172631
1261	4.41808
126119	-0.0520764
126129	-0.590067
1262	1.94539
126208	-0.0520764
126272	-0.590067
126282	5.70968
126298	11.1533
126299	1.3279
1263	6.88606
126353	0.195861
126374	1.78373
126382	1.58503
126393	3.24711
1264	5.08935
126410	1.27583
126432	4.93167
126433	8.57743
1265	2.86931
126526	3.08579
126567	2.66413
1266	3.75893
126626	9.48737
126638	1.46742
126669	3.8255
126695	1.77088
1267	2.92138
126767	1.14479
126789	1.82391
126792	3.91559
1268	4.46411
126820	-0.590067
126823	1.58503
126868	7.10546
1269	4.75821
126917	14.0004
126961	-0.0520764
126969	6.42438
127	3.84346
127002	-0.590067
127018	4.77281
1271	1.95879
127124	-0.172631
1272	6.49597
127253	5.68819
127254	8.03728
127255	8.45656
127262	-0.590067
127281	1.88606
127294	1.3279
127343	7.87957
127385	0.318759
127391	1.85387
127428	11.3795
127435	3.26627
127495	9.93519
127534	-0.590067
127544	5.89608
127550	3.34368
127670	1.93569
1277	0.350665
127700	2.82737
127703	6.99455
127707	12.913
127731	1.65758
127733	2.8572
1278	7.31675
127829	6.3723
127833	2.74812
127933	11.7283
128	0.74163
1280	1.87372
128025	3.0982
128061	-0.590067
128077	0.42351
1281	5.00705
128153	1.39794
128178	3.50565
1282	3.44866
128209	3.12675
128218	-0.224707
128239	3.28674
128272	-0.642143
128308	1.04357
128338	13.3728
128367	2.91507
128387	1.42022
1284	4.30478
128408	4.41808
128414	-0.172631
128434	-0.137688
128486	1.53295
128488	-0.590067
1285	11.512
128506	3.68346
128553	7.72862
1286	9.58725
128602	5.0063
128611	10.031
128637	9.81652
128674	6.84692
1287	4.63505
128710	6.01357
1288	13.6503
128822	3.51145
128853	5.57219
128859	1.85387
128861	-0.590067
128864	1.42022
128866	2.54
128869	0.99496
1289	7.81056
128989	5.20772
1290	10.9426
129049	8.41426
129080	2.40993
1291	3.71702
129138	0.987163
1292	-0.326657
129285	9.79955
1293	3.37675
1294	1.55284
129401	10.531
129446	5.4112
129450	2.09237
1295	0.514619
129521	3
129531	1.77474
129563	14.4711
1296	1.04428
129607	3.06153
129642	6.24037
129684	4.66421
129685	0.861768
1297	1.19082
129787	5.89616
1298	-0.172631
129804	0.847712
129807	4.07275
129831	4.57822
129880	2.82275
129881	0.0472076
1299	7.30862
130	0.847712
1300	7.28187
130013	2.4603
130026	4.20118
130074	14.2755
1301	11.0511
130106	1.39794
130120	3.45146
130132	3.21419
1302	3.7167
130271	11.6028
1303	7.05423
130340	7.83974
130367	2.60664
130399	22.2372
130497	5.21453
1305	0.79717
130507	6.526
130535	5.48826
130540	1.56882
130557	1.58503
130560	4.10053
130574	8.29406
130589	1.5782
1306	1.31654
130612	3.19586
130617	0.240332
1307	5.14986
130733	2.18302
130752	1.29599
1308	8.11969
130813	-0.0520764
130814	1.36409
130827	-0.267606
130872	11.3619
130888	-0.0520764
130916	10.238
130940	3.76133
130951	4.30862
131	3.18046
1310	18.817
131034	8.55325
131096	6.12458
1311	5.22185
131118	1.36233
131149	2.01284
131177	1.58627
1312	4.83935
131368	3.24872
131375	-0.172631
131377	2.40993
1314	2.52011
131405	7.48769
131408	3.10879
131450	13.5119
131540	0.0472076
131544	6.10095
131566	13.8092
131578	10.7725
131583	2.41325
1316	7.25798
131601	0.675081
131616	-0.0520764
131669	3.38682
1317	5.75029
1318	9.58296
131870	4.48538
131873	3.45937
131920	2.07302
131965	1.39794
132	1.14874
132014	0.966576
132112	3.59285
132158	2.46238
132160	2.82737
132203	2.3822
132204	13.2955
132243	2.37277
132320	14.1258
132321	4.81034
132430	7.43209
1326	9.79955
132660	12.8179
132671	2.30103
132720	0.0434332
132724	6.89079
132789	5.85069
132851	2.87322
132864	15.3356
132884	1.36032
132949	3
132954	1.72125
133	9.47806
133015	1.53295
133022	3.4677
133060	1.65758
133121	8.55217
133308	0.37366
133396	5.50224
133482	12.567
133491	6.83398
133522	5.26723
133584	2.22529
133619	13.6641
133686	6.72136
133688	4.98548
1337	0.257645
133746	6.32911
1339	2.73002
133923	2.65053
133957	8.8661
134	2.01562
1340	0.737835
134083	0.719557
134111	1.89956
134121	1.73363
134145	1.85387
134147	1.67857
134187	0.350665
134218	0.958607
134265	4.65852
134266	8.10804
134285	0.350665
134288	2.20543
134353	6.95616
134359	3.87615
134429	9.03693
134430	4.26914
134492	1.3279
1345	1.02687
134510	0.257645
134526	-0.172631
134548	7.8913
134549	3.23386
134553	4.42484
134637	-0.224707
1347	2.1486
134728	1.34586
134829	9.99592
134957	18.5337
135	3.00524
1351	1.42022
135112	9.02644
135114	1.49485
135138	0.43604
135152	5.30232
135154	0.304825
1352	3.40628
135228	1.14479
135295	7.02713
1353	6.04774
135398	3.07988
135458	7.12286
1355	9.2289
1356	3.31003
135644	-0.0520764
135656	1.53295
1358	0.350665
135886	-0.590067
1359	3.14242
135927	2.19357
135932	0.782516
135941	0.091515
135946	-0.267606
136	-0.267606
1360	-0.590067
136051	1.85387
1361	0.350665
1362	5.19162
136227	0.942883
136259	1.10199
136263	1.5376
136288	7.72125
1363	7.57108
136306	3.21073
136319	10.7275
136371	1.53295
1364	1.30784
1365	2.22185
136647	1.33583
1368	0.16813
136853	0.195861
136895	3.73993
136991	1.87458
1370	1.86114
137075	2.43274
1371	3.04141
1373	1.42022
137362	1.85387
137392	0.4698
1374	1.83537
137492	11.7434
1375	1.72125
1376	0.0644927
137695	6.8181
137735	-0.0520764
137814	2.6119
137835	3.4335
137868	0.669424
137872	6.19065
137886	14.4243
1379	3.95129
137964	1.70951
137970	4.2103
137994	1.72504
1380	6.12708
138046	8.68606
138050	1.58503
138065	0.195861
1381	4.93167
138151	13.7454
138162	3.33882
138199	6.59071
1382	1.58503
138307	1.78089
138311	-0.590067
1384	4.92385
138429	-0.590067
138474	1.72125
1385	26.6706
1386	18.7306
138639	3.13364
138715	3.68875
1388	1.58503
1389	4.5297
1390	14.8643
139065	14.8201
139189	6.06406
139212	3.90653
139221	5.67822
139231	8.31397
139285	9.83166
1393	2.40055
139322	7.29633
139324	10.6508
139341	5.50467
139411	14.2237
1395	3.67368
139599	0.0658758
139604	-1.03152
139628	10.7914
1397	2.62204
139716	1.58503
139728	1.58503
139735	0.188344
139741	0.333482
139760	1.31742
1398	7.7621
139818	6.05628
139886	7.01567
1399	5.10216
14	-0.590067
140	-0.0520764
1400	-0.590067
1401	6.64293
1404	12.2273
140456	4.61156
140459	1.99766
140460	6.69327
140461	9.29035
140465	-0.0520764
140467	3
140469	3.99241
140545	0.350665
140576	1.55775
140578	3.81355
1406	2.46721
140606	-0.590067
140609	8.62532
140612	6.74242
140628	4.61646
140679	3.72198
140680	1.55284
140683	1.93005
140685	1.3279
140686	1.84267
140687	1.58503
140688	19.3165
140689	14.9012
140690	0.845103
1407	3.85177
140700	10.8707
140701	4.95389
140706	1.59744
140707	3.14465
140710	8.04985
140730	2.42527
140733	12.5023
140735	9.98253
140738	4.95702
140739	8.06808
140766	5.59569
140767	4.62498
140775	6.84879
1408	7.47525
140801	1.85387
140803	1.88606
140809	4.85707
140823	0.488117
140825	1.88606
140831	1.15254
140836	1.58503
140838	4.3012
140862	5.99704
140870	-0.762698
140873	4.65758
140876	0.79717
140883	16.3187
140886	5.71152
140890	8.83304
140893	0.195861
1409	-0.590067
140901	11.2126
1410	0.195861
1411	1.85387
1412	1.07058
1413	1.72125
1417	0.782516
1419	3
142	-0.183805
1420	1.67778
142679	0.504456
142680	0.501689
142686	6.76737
142689	1.05012
1428	1.18303
142891	13.765
142910	6.45347
142940	3.69238
143	4.52288
143098	3.49086
1431	3.125
143187	13.6058
1432	8.37641
143241	0.350665
143244	2.91293
143279	10.4584
143282	5.89889
143384	11.1645
1434	6.71179
143425	5.16702
143458	11.9732
143471	1.39794
1435	7.55562
143503	6.31876
1436	3.14534
143630	1.23363
143662	2.1587
143684	10.1538
143686	9.38051
143689	6.30627
1437	2.32591
1438	1.03564
143872	6.32214
143884	5.68953
143888	2.31638
1439	2.63292
143941	-0.590067
1440	1.58503
144097	1.53295
144100	5.21453
144108	13.5652
144110	1.01819
144132	1.02687
144165	3.32146
144193	1.55284
144233	-0.762698
[truncated: 12,012 more rows]
