# Supplementary material for: RBiomirGS: an all-in-one miRNA gene set analysis solution featuring target mRNA mapping and expression profile integration
Source: PeerJ journal article supplement (doi:10.7717/peerj.4262), 2018-01-12
Supplement: suppl.zip [file liver_predicted.xlsx]

## Sheet: mmu-miR-1b-5p
database	mature_mirna_acc	mature_mirna_id	target_symbol	target_entrez	target_ensembl	score
diana_microt	MIMAT0005835	mmu-miR-1b-5p	Neurog2	11924	ENSMUSG00000027967	1
diana_microt	MIMAT0005835	mmu-miR-1b-5p	Ttc39a	230603	ENSMUSG00000028555	1
diana_microt	MIMAT0005835	mmu-miR-1b-5p	Btnl10	192194	ENSMUSG00000020490	1
diana_microt	MIMAT0005835	mmu-miR-1b-5p	Pfkfb2	18640	ENSMUSG00000026409	1
diana_microt	MIMAT0005835	mmu-miR-1b-5p	Pes1	64934	ENSMUSG00000020430	1
diana_microt	MIMAT0005835	mmu-miR-1b-5p	Olfr658	259051	ENSMUSG00000070421	1
diana_microt	MIMAT0005835	mmu-miR-1b-5p	Unk	217331	ENSMUSG00000020770	0.999
diana_microt	MIMAT0005835	mmu-miR-1b-5p	Chd2	244059	ENSMUSG00000078671	0.999
diana_microt	MIMAT0005835	mmu-miR-1b-5p	Npm1	18148	ENSMUSG00000057113	0.998
diana_microt	MIMAT0005835	mmu-miR-1b-5p	Npm1	100046628	ENSMUSG00000057113	0.998
diana_microt	MIMAT0005835	mmu-miR-1b-5p	Mei4	75033	ENSMUSG00000043289	0.998
diana_microt	MIMAT0005835	mmu-miR-1b-5p	Riok3	66878	ENSMUSG00000024404	0.997
diana_microt	MIMAT0005835	mmu-miR-1b-5p	Hivep1	110521	ENSMUSG00000021366	0.996
diana_microt	MIMAT0005835	mmu-miR-1b-5p	Rsbn1	229675	ENSMUSG00000044098	0.996
diana_microt	MIMAT0005835	mmu-miR-1b-5p	Zfhx4	80892	ENSMUSG00000025255	0.996
diana_microt	MIMAT0005835	mmu-miR-1b-5p	Hipk1	15257	ENSMUSG00000008730	0.996
diana_microt	MIMAT0005835	mmu-miR-1b-5p	Atxn2l	233871	ENSMUSG00000032637	0.996
diana_microt	MIMAT0005835	mmu-miR-1b-5p	Zfp462	242466	ENSMUSG00000060206	0.996
diana_microt	MIMAT0005835	mmu-miR-1b-5p	Tet3	194388	ENSMUSG00000034832	0.995
diana_microt	MIMAT0005835	mmu-miR-1b-5p	Tspan3	56434	ENSMUSG00000032324	0.995
diana_microt	MIMAT0005835	mmu-miR-1b-5p	Cask	12361	ENSMUSG00000031012	0.995
diana_microt	MIMAT0005835	mmu-miR-1b-5p	Birc6	12211	ENSMUSG00000024073	0.995
diana_microt	MIMAT0005835	mmu-miR-1b-5p	Pnrc1	108767	ENSMUSG00000040128	0.995
diana_microt	MIMAT0005835	mmu-miR-1b-5p	Sntg1	71096	ENSMUSG00000025909	0.995
diana_microt	MIMAT0005835	mmu-miR-1b-5p	Ctdspl2	329506	ENSMUSG00000033411	0.995
diana_microt	MIMAT0005835	mmu-miR-1b-5p	Asxl2	75302	ENSMUSG00000037486	0.993
diana_microt	MIMAT0005835	mmu-miR-1b-5p	Rorb	225998	ENSMUSG00000036192	0.993
diana_microt	MIMAT0005835	mmu-miR-1b-5p	Ino80d	227195	ENSMUSG00000040865	0.992
diana_microt	MIMAT0005835	mmu-miR-1b-5p	Ube3a	22215	ENSMUSG00000025326	0.991
diana_microt	MIMAT0005835	mmu-miR-1b-5p	Gm13280	230398	ENSMUSG00000078355	0.99
diana_microt	MIMAT0005835	mmu-miR-1b-5p	Ccdc169	320604	ENSMUSG00000048655	0.99
diana_microt	MIMAT0005835	mmu-miR-1b-5p	Emx2	13797	ENSMUSG00000043969	0.99
diana_microt	MIMAT0005835	mmu-miR-1b-5p	Hoxd1	15429	ENSMUSG00000042448	0.99
diana_microt	MIMAT0005835	mmu-miR-1b-5p	P2rx6	18440	ENSMUSG00000022758	0.99
diana_microt	MIMAT0005835	mmu-miR-1b-5p	Lin9	72568	ENSMUSG00000058729	0.989
diana_microt	MIMAT0005835	mmu-miR-1b-5p	Smarca5	93762	ENSMUSG00000031715	0.989
diana_microt	MIMAT0005835	mmu-miR-1b-5p	Csnk1g3	70425	ENSMUSG00000073563	0.989
diana_microt	MIMAT0005835	mmu-miR-1b-5p	Cnot6l	231464	ENSMUSG00000034724	0.988
diana_microt	MIMAT0005835	mmu-miR-1b-5p	Apol7d		ENSMUSG00000073652	0.988
diana_microt	MIMAT0005835	mmu-miR-1b-5p	Tns3	319939	ENSMUSG00000020422	0.988
diana_microt	MIMAT0005835	mmu-miR-1b-5p	Kdm2b	30841	ENSMUSG00000029475	0.987
diana_microt	MIMAT0005835	mmu-miR-1b-5p	Cab39	12283	ENSMUSG00000036707	0.987
diana_microt	MIMAT0005835	mmu-miR-1b-5p	Papolg	216578	ENSMUSG00000020273	0.987
diana_microt	MIMAT0005835	mmu-miR-1b-5p	Lrrc8c	100604	ENSMUSG00000054720	0.986
diana_microt	MIMAT0005835	mmu-miR-1b-5p	Fzd7	14369	ENSMUSG00000041075	0.986
diana_microt	MIMAT0005835	mmu-miR-1b-5p	Zfand5	22682	ENSMUSG00000024750	0.986
diana_microt	MIMAT0005835	mmu-miR-1b-5p	Smim20	66278	ENSMUSG00000061461	0.985
diana_microt	MIMAT0005835	mmu-miR-1b-5p	Rybp	56353	ENSMUSG00000072872	0.984
diana_microt	MIMAT0005835	mmu-miR-1b-5p	Kat6a	244349	ENSMUSG00000031540	0.984
diana_microt	MIMAT0005835	mmu-miR-1b-5p	Rnf214	235315	ENSMUSG00000042790	0.984
diana_microt	MIMAT0005835	mmu-miR-1b-5p	Rybp	628746	ENSMUSG00000072872	0.984
diana_microt	MIMAT0005835	mmu-miR-1b-5p	Sox9	20682	ENSMUSG00000000567	0.983
diana_microt	MIMAT0005835	mmu-miR-1b-5p	Cdc73	214498	ENSMUSG00000026361	0.982
diana_microt	MIMAT0005835	mmu-miR-1b-5p	Cyld	74256	ENSMUSG00000036712	0.981
diana_microt	MIMAT0005835	mmu-miR-1b-5p	Pcdh19	279653	ENSMUSG00000051323	0.981
diana_microt	MIMAT0005835	mmu-miR-1b-5p	Cnot2	72068	ENSMUSG00000020166	0.979
diana_microt	MIMAT0005835	mmu-miR-1b-5p	Ms4a4b	60361	ENSMUSG00000056290	0.979
diana_microt	MIMAT0005835	mmu-miR-1b-5p	Eps15	13858	ENSMUSG00000028552	0.979
diana_microt	MIMAT0005835	mmu-miR-1b-5p	Cul3	26554	ENSMUSG00000004364	0.978
diana_microt	MIMAT0005835	mmu-miR-1b-5p	Rnf19b	75234	ENSMUSG00000028793	0.977
diana_microt	MIMAT0005835	mmu-miR-1b-5p	Tcf7l2	21416	ENSMUSG00000024985	0.977
diana_microt	MIMAT0005835	mmu-miR-1b-5p	Mkln1	27418	ENSMUSG00000025609	0.976
diana_microt	MIMAT0005835	mmu-miR-1b-5p	Apool	68117	ENSMUSG00000025525	0.976
diana_microt	MIMAT0005835	mmu-miR-1b-5p	Zfp804a	241514	ENSMUSG00000070866	0.976
diana_microt	MIMAT0005835	mmu-miR-1b-5p	Cxcl10	15945	ENSMUSG00000034855	0.976
diana_microt	MIMAT0005835	mmu-miR-1b-5p	Foxr2	436240	ENSMUSG00000071665	0.976
diana_microt	MIMAT0005835	mmu-miR-1b-5p	Ppp1r21	73825	ENSMUSG00000034709	0.975
diana_microt	MIMAT0005835	mmu-miR-1b-5p	Dclk1	13175	ENSMUSG00000027797	0.973
diana_microt	MIMAT0005835	mmu-miR-1b-5p	Max	17187	ENSMUSG00000059436	0.973
diana_microt	MIMAT0005835	mmu-miR-1b-5p	Oas3	246727	ENSMUSG00000032661	0.973
diana_microt	MIMAT0005835	mmu-miR-1b-5p	Atxn1l	52335	ENSMUSG00000069895	0.972
diana_microt	MIMAT0005835	mmu-miR-1b-5p	Wapal	218914	ENSMUSG00000041408	0.972
diana_microt	MIMAT0005835	mmu-miR-1b-5p	Golim4	73124	ENSMUSG00000034109	0.97
diana_microt	MIMAT0005835	mmu-miR-1b-5p	Lin54	231506	ENSMUSG00000035310	0.969
diana_microt	MIMAT0005835	mmu-miR-1b-5p	Srgap1	117600	ENSMUSG00000020121	0.969
diana_microt	MIMAT0005835	mmu-miR-1b-5p	Msl2	77853	ENSMUSG00000066415	0.969
diana_microt	MIMAT0005835	mmu-miR-1b-5p	Phip	83946	ENSMUSG00000032253	0.969
diana_microt	MIMAT0005835	mmu-miR-1b-5p	Igf1	16000	ENSMUSG00000020053	0.968
diana_microt	MIMAT0005835	mmu-miR-1b-5p	Frmd5	228564	ENSMUSG00000027238	0.967
diana_microt	MIMAT0005835	mmu-miR-1b-5p	Rims1		ENSMUSG00000041670	0.967
diana_microt	MIMAT0005835	mmu-miR-1b-5p	Eri1	67276	ENSMUSG00000031527	0.967
diana_microt	MIMAT0005835	mmu-miR-1b-5p	Ap3s1	11777	ENSMUSG00000024480	0.967
diana_microt	MIMAT0005835	mmu-miR-1b-5p	Lonrf1	244421	ENSMUSG00000039633	0.967
diana_microt	MIMAT0005835	mmu-miR-1b-5p	Frmd6	319710	ENSMUSG00000048285	0.966
diana_microt	MIMAT0005835	mmu-miR-1b-5p	Cdk5r1	12569	ENSMUSG00000048895	0.964
diana_microt	MIMAT0005835	mmu-miR-1b-5p	Cxxc4	319478	ENSMUSG00000044365	0.964
diana_microt	MIMAT0005835	mmu-miR-1b-5p	Znrf3	407821	ENSMUSG00000041961	0.964
diana_microt	MIMAT0005835	mmu-miR-1b-5p	Ubap2	68926	ENSMUSG00000028433	0.964
diana_microt	MIMAT0005835	mmu-miR-1b-5p	Slc16a9	66859	ENSMUSG00000037762	0.963
diana_microt	MIMAT0005835	mmu-miR-1b-5p	Zfp715	69930	ENSMUSG00000012640	0.963
diana_microt	MIMAT0005835	mmu-miR-1b-5p	Ehf	13661	ENSMUSG00000012350	0.963
diana_microt	MIMAT0005835	mmu-miR-1b-5p	Hs3st3b1	54710	ENSMUSG00000070407	0.962
diana_microt	MIMAT0005835	mmu-miR-1b-5p	Ccnt1	12455	ENSMUSG00000011960	0.962
diana_microt	MIMAT0005835	mmu-miR-1b-5p	Acap2	78618	ENSMUSG00000049076	0.961
diana_microt	MIMAT0005835	mmu-miR-1b-5p	Psmc6	67089	ENSMUSG00000021832	0.959
diana_microt	MIMAT0005835	mmu-miR-1b-5p	Rgs9	19739	ENSMUSG00000020599	0.958
diana_microt	MIMAT0005835	mmu-miR-1b-5p	Srsf5	20384	ENSMUSG00000021134	0.957
diana_microt	MIMAT0005835	mmu-miR-1b-5p	Trhde	237553	ENSMUSG00000050663	0.957
diana_microt	MIMAT0005835	mmu-miR-1b-5p	Gm14443		ENSMUSG00000078902	0.957
diana_microt	MIMAT0005835	mmu-miR-1b-5p	Rbbp6	19647	ENSMUSG00000030779	0.956
diana_microt	MIMAT0005835	mmu-miR-1b-5p	Emc7	73024	ENSMUSG00000055943	0.955
diana_microt	MIMAT0005835	mmu-miR-1b-5p	Synpr	72003	ENSMUSG00000056296	0.954
diana_microt	MIMAT0005835	mmu-miR-1b-5p	BC034902		ENSMUSG00000017914	0.954
diana_microt	MIMAT0005835	mmu-miR-1b-5p	Mib1	225164	ENSMUSG00000024294	0.952
diana_microt	MIMAT0005835	mmu-miR-1b-5p	Rab11a	53869	ENSMUSG00000004771	0.95
diana_microt	MIMAT0005835	mmu-miR-1b-5p	Rab1	19324	ENSMUSG00000020149	0.949
diana_microt	MIMAT0005835	mmu-miR-1b-5p	Zfhx3	11906	ENSMUSG00000038872	0.949
diana_microt	MIMAT0005835	mmu-miR-1b-5p	Acvr1c	269275	ENSMUSG00000026834	0.949
diana_microt	MIMAT0005835	mmu-miR-1b-5p	Pcf11	74737	ENSMUSG00000041328	0.948
diana_microt	MIMAT0005835	mmu-miR-1b-5p	Gabra2	14395	ENSMUSG00000000560	0.945
diana_microt	MIMAT0005835	mmu-miR-1b-5p	Ccdc68	381175	ENSMUSG00000038903	0.944
diana_microt	MIMAT0005835	mmu-miR-1b-5p	Socs6	54607	ENSMUSG00000056153	0.944
diana_microt	MIMAT0005835	mmu-miR-1b-5p	Gnpda2	67980	ENSMUSG00000029209	0.944
diana_microt	MIMAT0005835	mmu-miR-1b-5p	Tubgcp5	233276	ENSMUSG00000033790	0.943
diana_microt	MIMAT0005835	mmu-miR-1b-5p	Itsn1	16443	ENSMUSG00000022957	0.943
diana_microt	MIMAT0005835	mmu-miR-1b-5p	Pcdh11x	245578	ENSMUSG00000034755	0.942
diana_microt	MIMAT0005835	mmu-miR-1b-5p	Vwa5a	67776	ENSMUSG00000023186	0.941
diana_microt	MIMAT0005835	mmu-miR-1b-5p	Irf2bpl	238330	ENSMUSG00000034168	0.941
diana_microt	MIMAT0005835	mmu-miR-1b-5p	Appbp2	66884	ENSMUSG00000018481	0.94
diana_microt	MIMAT0005835	mmu-miR-1b-5p	Nxph2	18232	ENSMUSG00000069132	0.94
diana_microt	MIMAT0005835	mmu-miR-1b-5p	Kbtbd7	211255	ENSMUSG00000043881	0.94
diana_microt	MIMAT0005835	mmu-miR-1b-5p	Asap1	13196	ENSMUSG00000022377	0.939
diana_microt	MIMAT0005835	mmu-miR-1b-5p	Kctd4	67516	ENSMUSG00000046523	0.939
diana_microt	MIMAT0005835	mmu-miR-1b-5p	Sostdc1	66042	ENSMUSG00000036169	0.937
diana_microt	MIMAT0005835	mmu-miR-1b-5p	Ccnt2	72949	ENSMUSG00000026349	0.936
diana_microt	MIMAT0005835	mmu-miR-1b-5p	Zfpm2	22762	ENSMUSG00000022306	0.936
diana_microt	MIMAT0005835	mmu-miR-1b-5p	Lin52	629959	ENSMUSG00000085793	0.935
diana_microt	MIMAT0005835	mmu-miR-1b-5p	Ociad1	68095	ENSMUSG00000029152	0.935
diana_microt	MIMAT0005835	mmu-miR-1b-5p	Lin52	217708	ENSMUSG00000085793	0.935
diana_microt	MIMAT0005835	mmu-miR-1b-5p	Ier3	15937	ENSMUSG00000003541	0.935
diana_microt	MIMAT0005835	mmu-miR-1b-5p	Tnrc6c	217351	ENSMUSG00000025571	0.934
diana_microt	MIMAT0005835	mmu-miR-1b-5p	Zbtb44	235132	ENSMUSG00000047412	0.934
diana_microt	MIMAT0005835	mmu-miR-1b-5p	Xiap	11798	ENSMUSG00000025860	0.933
diana_microt	MIMAT0005835	mmu-miR-1b-5p	Pgam5	72542	ENSMUSG00000029500	0.933
diana_microt	MIMAT0005835	mmu-miR-1b-5p	Zfp738	408068	ENSMUSG00000048280	0.932
diana_microt	MIMAT0005835	mmu-miR-1b-5p	Impad1	242291	ENSMUSG00000066324	0.931
diana_microt	MIMAT0005835	mmu-miR-1b-5p	Rnf11	29864	ENSMUSG00000028557	0.931
diana_microt	MIMAT0005835	mmu-miR-1b-5p	Brms1l	52592	ENSMUSG00000012076	0.931
diana_microt	MIMAT0005835	mmu-miR-1b-5p	Rerg	232441	ENSMUSG00000030222	0.93
diana_microt	MIMAT0005835	mmu-miR-1b-5p	Lilrb3	18733	ENSMUSG00000058818	0.93
diana_microt	MIMAT0005835	mmu-miR-1b-5p	Lrrtm2	107065	ENSMUSG00000071862	0.929
diana_microt	MIMAT0005835	mmu-miR-1b-5p	Fbxo11	225055	ENSMUSG00000005371	0.929
diana_microt	MIMAT0005835	mmu-miR-1b-5p	AA987161	100416706	ENSMUSG00000058093	0.928
diana_microt	MIMAT0005835	mmu-miR-1b-5p	Stxbp5	78808	ENSMUSG00000019790	0.928
diana_microt	MIMAT0005835	mmu-miR-1b-5p	Chek1	12649	ENSMUSG00000032113	0.928
diana_microt	MIMAT0005835	mmu-miR-1b-5p	Fam60a	56306	ENSMUSG00000039985	0.928
diana_microt	MIMAT0005835	mmu-miR-1b-5p	Fsd1l	319636	ENSMUSG00000054752	0.928
diana_microt	MIMAT0005835	mmu-miR-1b-5p	Fzd5	14367	ENSMUSG00000045005	0.927
diana_microt	MIMAT0005835	mmu-miR-1b-5p	Taok1	216965	ENSMUSG00000017291	0.925
diana_microt	MIMAT0005835	mmu-miR-1b-5p	Gfod1	328232	ENSMUSG00000051335	0.925
diana_microt	MIMAT0005835	mmu-miR-1b-5p	A630001G21Rik	319997	ENSMUSG00000052760	0.924
diana_microt	MIMAT0005835	mmu-miR-1b-5p	Nrbf2	641340	ENSMUSG00000075000	0.923
diana_microt	MIMAT0005835	mmu-miR-1b-5p	Dennd4a	102442	ENSMUSG00000053641	0.922
diana_microt	MIMAT0005835	mmu-miR-1b-5p	Pds5b	100710	ENSMUSG00000034021	0.922
diana_microt	MIMAT0005835	mmu-miR-1b-5p	Cd300a	217303	ENSMUSG00000034652	0.922
diana_microt	MIMAT0005835	mmu-miR-1b-5p	Tcf12	21406	ENSMUSG00000032228	0.921
diana_microt	MIMAT0005835	mmu-miR-1b-5p	Ncoa1	17977	ENSMUSG00000020647	0.921
diana_microt	MIMAT0005835	mmu-miR-1b-5p	Zfp759	268670	ENSMUSG00000057396	0.921
diana_microt	MIMAT0005835	mmu-miR-1b-5p	Zfp354a	21408	ENSMUSG00000020364	0.92
diana_microt	MIMAT0005835	mmu-miR-1b-5p	Fam196b	574403	ENSMUSG00000069911	0.92
diana_microt	MIMAT0005835	mmu-miR-1b-5p	Krit1	79264	ENSMUSG00000000600	0.92
diana_microt	MIMAT0005835	mmu-miR-1b-5p	Pdpk1	18607	ENSMUSG00000024122	0.919
diana_microt	MIMAT0005835	mmu-miR-1b-5p	Csrnp3	77771	ENSMUSG00000044647	0.919
diana_microt	MIMAT0005835	mmu-miR-1b-5p	Ptma	100504173	ENSMUSG00000026238	0.918
diana_microt	MIMAT0005835	mmu-miR-1b-5p	Ptma	19231	ENSMUSG00000026238	0.918
diana_microt	MIMAT0005835	mmu-miR-1b-5p	Srsf3	20383	ENSMUSG00000071172	0.918
diana_microt	MIMAT0005835	mmu-miR-1b-5p	Eif5	217869	ENSMUSG00000021282	0.917
diana_microt	MIMAT0005835	mmu-miR-1b-5p	Gm16493		ENSMUSG00000078306	0.917
diana_microt	MIMAT0005835	mmu-miR-1b-5p	Eif5	100047658	ENSMUSG00000021282	0.917
diana_microt	MIMAT0005835	mmu-miR-1b-5p	Zfp148	22661	ENSMUSG00000022811	0.917
diana_microt	MIMAT0005835	mmu-miR-1b-5p	Peg3	18616	ENSMUSG00000002265	0.916
diana_microt	MIMAT0005835	mmu-miR-1b-5p	Nova1	664883	ENSMUSG00000021047	0.916
diana_microt	MIMAT0005835	mmu-miR-1b-5p	Wdr44	72404	ENSMUSG00000036769	0.916
diana_microt	MIMAT0005835	mmu-miR-1b-5p	Khdrbs1	20218	ENSMUSG00000028790	0.915
diana_microt	MIMAT0005835	mmu-miR-1b-5p	Eme1	268465	ENSMUSG00000039055	0.913
diana_microt	MIMAT0005835	mmu-miR-1b-5p	Ikzf5	67143	ENSMUSG00000040167	0.912
diana_microt	MIMAT0005835	mmu-miR-1b-5p	Dusp16	70686	ENSMUSG00000030203	0.91
diana_microt	MIMAT0005835	mmu-miR-1b-5p	Rab12	19328	ENSMUSG00000023460	0.909
diana_microt	MIMAT0005835	mmu-miR-1b-5p	Mef2a	17258	ENSMUSG00000030557	0.908
diana_microt	MIMAT0005835	mmu-miR-1b-5p	Ccdc47	67163	ENSMUSG00000078622	0.906
diana_microt	MIMAT0005835	mmu-miR-1b-5p	Fam160a2	74349	ENSMUSG00000044465	0.906
diana_microt	MIMAT0005835	mmu-miR-1b-5p	Sval3	387564	ENSMUSG00000062833	0.906
diana_microt	MIMAT0005835	mmu-miR-1b-5p	Ptprs	19280	ENSMUSG00000013236	0.906
diana_microt	MIMAT0005835	mmu-miR-1b-5p	Mis18a	66578	ENSMUSG00000022978	0.905
diana_microt	MIMAT0005835	mmu-miR-1b-5p	Lemd3	380664	ENSMUSG00000048661	0.904
diana_microt	MIMAT0005835	mmu-miR-1b-5p	Nampt	59027	ENSMUSG00000020572	0.904
diana_microt	MIMAT0005835	mmu-miR-1b-5p	Dhrs9	241452	ENSMUSG00000027068	0.903
diana_microt	MIMAT0005835	mmu-miR-1b-5p	Ints2	70422	ENSMUSG00000018068	0.903
diana_microt	MIMAT0005835	mmu-miR-1b-5p	Nudt10	102954	ENSMUSG00000073293	0.902
diana_microt	MIMAT0005835	mmu-miR-1b-5p	Pdcd6ip	18571	ENSMUSG00000032504	0.902
diana_microt	MIMAT0005835	mmu-miR-1b-5p	Nudt10	58242	ENSMUSG00000073293	0.902
diana_microt	MIMAT0005835	mmu-miR-1b-5p	Tfap2b	21419	ENSMUSG00000025927	0.901
diana_microt	MIMAT0005835	mmu-miR-1b-5p	Haus2	66296	ENSMUSG00000027285	0.9
diana_microt	MIMAT0005835	mmu-miR-1b-5p	Psd3	234353	ENSMUSG00000030465	0.898
diana_microt	MIMAT0005835	mmu-miR-1b-5p	Ssh2	237860	ENSMUSG00000037926	0.898
diana_microt	MIMAT0005835	mmu-miR-1b-5p	Enpp4	224794	ENSMUSG00000023961	0.898
diana_microt	MIMAT0005835	mmu-miR-1b-5p	Api5	11800	ENSMUSG00000027193	0.897
diana_microt	MIMAT0005835	mmu-miR-1b-5p	Slc7a2	11988	ENSMUSG00000031596	0.897
diana_microt	MIMAT0005835	mmu-miR-1b-5p	Gucy1b3	54195	ENSMUSG00000028005	0.897
diana_microt	MIMAT0005835	mmu-miR-1b-5p	Dab2ip	69601	ENSMUSG00000026883	0.896
diana_microt	MIMAT0005835	mmu-miR-1b-5p	Nrip1	268903	ENSMUSG00000048490	0.895
diana_microt	MIMAT0005835	mmu-miR-1b-5p	AW551984	244810	ENSMUSG00000038112	0.895
diana_microt	MIMAT0005835	mmu-miR-1b-5p	Trim9	94090	ENSMUSG00000021071	0.895
diana_microt	MIMAT0005835	mmu-miR-1b-5p	Cmtm4	97487	ENSMUSG00000096188	0.894
diana_microt	MIMAT0005835	mmu-miR-1b-5p	Zfp595	218314	ENSMUSG00000057842	0.892
diana_microt	MIMAT0005835	mmu-miR-1b-5p	Wdr35	74682	ENSMUSG00000066643	0.892
diana_microt	MIMAT0005835	mmu-miR-1b-5p	Psma2	19166	ENSMUSG00000015671	0.892
diana_microt	MIMAT0005835	mmu-miR-1b-5p	Tlr4	21898	ENSMUSG00000039005	0.892
diana_microt	MIMAT0005835	mmu-miR-1b-5p	Olfr742	258422	ENSMUSG00000068431	0.89
diana_microt	MIMAT0005835	mmu-miR-1b-5p	C530008M17Rik	320827	ENSMUSG00000036377	0.89
diana_microt	MIMAT0005835	mmu-miR-1b-5p	Rc3h2	319817	ENSMUSG00000075376	0.89
diana_microt	MIMAT0005835	mmu-miR-1b-5p	Chd9	109151	ENSMUSG00000056608	0.888
diana_microt	MIMAT0005835	mmu-miR-1b-5p	Rbm12	75710	ENSMUSG00000089824	0.887
diana_microt	MIMAT0005835	mmu-miR-1b-5p	Tra2b	20462	ENSMUSG00000022858	0.886
diana_microt	MIMAT0005835	mmu-miR-1b-5p	Senp6	215351	ENSMUSG00000034252	0.885
diana_microt	MIMAT0005835	mmu-miR-1b-5p	Tmem30a	69981	ENSMUSG00000032328	0.885
diana_microt	MIMAT0005835	mmu-miR-1b-5p	Cltc	67300	ENSMUSG00000047126	0.885
diana_microt	MIMAT0005835	mmu-miR-1b-5p	Fbxo33	70611	ENSMUSG00000035329	0.885
diana_microt	MIMAT0005835	mmu-miR-1b-5p	Nsun6	74455	ENSMUSG00000026707	0.884
diana_microt	MIMAT0005835	mmu-miR-1b-5p	Ptgdr	19214	ENSMUSG00000071489	0.883
diana_microt	MIMAT0005835	mmu-miR-1b-5p	Cacna1b	12287	ENSMUSG00000004113	0.883
diana_microt	MIMAT0005835	mmu-miR-1b-5p	Brca1	12189	ENSMUSG00000017146	0.883
diana_microt	MIMAT0005835	mmu-miR-1b-5p	Ankdd1b	271144	ENSMUSG00000047117	0.882
diana_microt	MIMAT0005835	mmu-miR-1b-5p	Zmym2	76007	ENSMUSG00000021945	0.882
diana_microt	MIMAT0005835	mmu-miR-1b-5p	Tnik	665113	ENSMUSG00000027692	0.882
diana_microt	MIMAT0005835	mmu-miR-1b-5p	Lin28b	380669	ENSMUSG00000063804	0.882
diana_microt	MIMAT0005835	mmu-miR-1b-5p	Zfp141		ENSMUSG00000092416	0.882
diana_microt	MIMAT0005835	mmu-miR-1b-5p	Gm17334		ENSMUSG00000091191	0.882
diana_microt	MIMAT0005835	mmu-miR-1b-5p	Ect2	13605	ENSMUSG00000027699	0.881
diana_microt	MIMAT0005835	mmu-miR-1b-5p	Cdc73		ENSMUSG00000078284	0.881
diana_microt	MIMAT0005835	mmu-miR-1b-5p	Stam	20844	ENSMUSG00000026718	0.88
diana_microt	MIMAT0005835	mmu-miR-1b-5p	Setd5	72895	ENSMUSG00000034269	0.879
diana_microt	MIMAT0005835	mmu-miR-1b-5p	Trmt2a	15547	ENSMUSG00000022721	0.879
diana_microt	MIMAT0005835	mmu-miR-1b-5p	Azi2	27215	ENSMUSG00000039285	0.877
diana_microt	MIMAT0005835	mmu-miR-1b-5p	Zmynd8	228880	ENSMUSG00000039671	0.877
diana_microt	MIMAT0005835	mmu-miR-1b-5p	Ccdc127	67433	ENSMUSG00000021578	0.877
diana_microt	MIMAT0005835	mmu-miR-1b-5p	Kitl	17311	ENSMUSG00000019966	0.876
diana_microt	MIMAT0005835	mmu-miR-1b-5p	Klhl11	217194	ENSMUSG00000048732	0.876
diana_microt	MIMAT0005835	mmu-miR-1b-5p	Cr2	12902	ENSMUSG00000026616	0.876
diana_microt	MIMAT0005835	mmu-miR-1b-5p	Rnf44	105239	ENSMUSG00000034928	0.875
diana_microt	MIMAT0005835	mmu-miR-1b-5p	Trim44	80985	ENSMUSG00000027189	0.875
diana_microt	MIMAT0005835	mmu-miR-1b-5p	Fam78b	226610	ENSMUSG00000060568	0.874
diana_microt	MIMAT0005835	mmu-miR-1b-5p	A530054K11Rik	212281	ENSMUSG00000021510	0.873
diana_microt	MIMAT0005835	mmu-miR-1b-5p	Ago3	214150	ENSMUSG00000028842	0.873
diana_microt	MIMAT0005835	mmu-miR-1b-5p	Pou2f1	18986	ENSMUSG00000026565	0.872
diana_microt	MIMAT0005835	mmu-miR-1b-5p	Gltscr1l	210982	ENSMUSG00000036568	0.87
diana_microt	MIMAT0005835	mmu-miR-1b-5p	Lhx5	16873	ENSMUSG00000029595	0.869
diana_microt	MIMAT0005835	mmu-miR-1b-5p	Armc4	74934	ENSMUSG00000061802	0.869
diana_microt	MIMAT0005835	mmu-miR-1b-5p	Rabgap1	227800	ENSMUSG00000035437	0.867
diana_microt	MIMAT0005835	mmu-miR-1b-5p	Yes1	22612	ENSMUSG00000014932	0.866
diana_microt	MIMAT0005835	mmu-miR-1b-5p	Cramp1l	57354	ENSMUSG00000038002	0.866
diana_microt	MIMAT0005835	mmu-miR-1b-5p	Serbp1	66870	ENSMUSG00000036371	0.866
diana_microt	MIMAT0005835	mmu-miR-1b-5p	Gnl3l	237107	ENSMUSG00000025266	0.865
diana_microt	MIMAT0005835	mmu-miR-1b-5p	Prkar2b	19088	ENSMUSG00000002997	0.865
diana_microt	MIMAT0005835	mmu-miR-1b-5p	Tmem65	74868	ENSMUSG00000062373	0.863
diana_microt	MIMAT0005835	mmu-miR-1b-5p	8430427H17Rik	329540	ENSMUSG00000061411	0.863
diana_microt	MIMAT0005835	mmu-miR-1b-5p	Nr4a2	18227	ENSMUSG00000026826	0.862
diana_microt	MIMAT0005835	mmu-miR-1b-5p	Tbx15	21384	ENSMUSG00000027868	0.862
diana_microt	MIMAT0005835	mmu-miR-1b-5p	Nr1h5	381463	ENSMUSG00000048938	0.862
diana_microt	MIMAT0005835	mmu-miR-1b-5p	Zfp664	269704	ENSMUSG00000079215	0.862
diana_microt	MIMAT0005835	mmu-miR-1b-5p	Robo2	268902	ENSMUSG00000052516	0.861
diana_microt	MIMAT0005835	mmu-miR-1b-5p	Cntrob	216846	ENSMUSG00000032782	0.86
diana_microt	MIMAT0005835	mmu-miR-1b-5p	Arl14ep	212772	ENSMUSG00000027122	0.86
diana_microt	MIMAT0005835	mmu-miR-1b-5p	Sept11	52398	ENSMUSG00000058013	0.859
diana_microt	MIMAT0005835	mmu-miR-1b-5p	Fbxo41	330369	ENSMUSG00000047013	0.859
diana_microt	MIMAT0005835	mmu-miR-1b-5p	Prkcd	18753	ENSMUSG00000021948	0.859
diana_microt	MIMAT0005835	mmu-miR-1b-5p	Crem	12916	ENSMUSG00000063889	0.858
diana_microt	MIMAT0005835	mmu-miR-1b-5p	Kif23	71819	ENSMUSG00000032254	0.858
diana_microt	MIMAT0005835	mmu-miR-1b-5p	Zfp26	22688	ENSMUSG00000063108	0.858
diana_microt	MIMAT0005835	mmu-miR-1b-5p	5830415F09Rik	74753	ENSMUSG00000028331	0.857
diana_microt	MIMAT0005835	mmu-miR-1b-5p	Rassf1	56289	ENSMUSG00000010067	0.856
diana_microt	MIMAT0005835	mmu-miR-1b-5p	D1Ertd622e	52392	ENSMUSG00000044768	0.856
diana_microt	MIMAT0005835	mmu-miR-1b-5p	Sox4	20677	ENSMUSG00000076431	0.856
diana_microt	MIMAT0005835	mmu-miR-1b-5p	Lhx1	16869	ENSMUSG00000018698	0.856
diana_microt	MIMAT0005835	mmu-miR-1b-5p	Gyk	14933	ENSMUSG00000025059	0.856
diana_microt	MIMAT0005835	mmu-miR-1b-5p	Lmo4	16911	ENSMUSG00000028266	0.856
diana_microt	MIMAT0005835	mmu-miR-1b-5p	Cenpi	102920	ENSMUSG00000031262	0.855
diana_microt	MIMAT0005835	mmu-miR-1b-5p	Xpo4	57258	ENSMUSG00000021952	0.855
diana_microt	MIMAT0005835	mmu-miR-1b-5p	Dlk1	13386	ENSMUSG00000040856	0.854
diana_microt	MIMAT0005835	mmu-miR-1b-5p	Cxcl5	20311	ENSMUSG00000029371	0.854
diana_microt	MIMAT0005835	mmu-miR-1b-5p	Kdm6a	22289	ENSMUSG00000037369	0.854
diana_microt	MIMAT0005835	mmu-miR-1b-5p	Phactr2	215789	ENSMUSG00000062866	0.854
diana_microt	MIMAT0005835	mmu-miR-1b-5p	Svil	225115	ENSMUSG00000024236	0.853
diana_microt	MIMAT0005835	mmu-miR-1b-5p	Dhrs7	66375	ENSMUSG00000021094	0.853
diana_microt	MIMAT0005835	mmu-miR-1b-5p	Hecw2	329152	ENSMUSG00000042807	0.853
diana_microt	MIMAT0005835	mmu-miR-1b-5p	Map3k2	26405	ENSMUSG00000024383	0.853
diana_microt	MIMAT0005835	mmu-miR-1b-5p	Plag1	56711	ENSMUSG00000003282	0.852
diana_microt	MIMAT0005835	mmu-miR-1b-5p	March7	57438	ENSMUSG00000026977	0.852
diana_microt	MIMAT0005835	mmu-miR-1b-5p	Enox1	239188	ENSMUSG00000022012	0.851
diana_microt	MIMAT0005835	mmu-miR-1b-5p	3110047P20Rik	319807	ENSMUSG00000090061	0.851
diana_microt	MIMAT0005835	mmu-miR-1b-5p	Arsj	271970	ENSMUSG00000046561	0.851
diana_microt	MIMAT0005835	mmu-miR-1b-5p	Mycbp	56309	ENSMUSG00000028647	0.85
diana_microt	MIMAT0005835	mmu-miR-1b-5p	Pbrm1	66923	ENSMUSG00000042323	0.85
diana_microt	MIMAT0005835	mmu-miR-1b-5p	Atf1	11908	ENSMUSG00000023027	0.849
diana_microt	MIMAT0005835	mmu-miR-1b-5p	Cdc14a	229776	ENSMUSG00000033502	0.849
diana_microt	MIMAT0005835	mmu-miR-1b-5p	Atf1	100040260	ENSMUSG00000023027	0.849
diana_microt	MIMAT0005835	mmu-miR-1b-5p	Bcas3	192197	ENSMUSG00000059439	0.849
diana_microt	MIMAT0005835	mmu-miR-1b-5p	Etv3	27049	ENSMUSG00000003382	0.848
diana_microt	MIMAT0005835	mmu-miR-1b-5p	Pura	19290	ENSMUSG00000043991	0.848
diana_microt	MIMAT0005835	mmu-miR-1b-5p	Cdh11	12552	ENSMUSG00000031673	0.847
diana_microt	MIMAT0005835	mmu-miR-1b-5p	Iws1	73473	ENSMUSG00000024384	0.846
diana_microt	MIMAT0005835	mmu-miR-1b-5p	Trove2	20822	ENSMUSG00000018199	0.846
diana_microt	MIMAT0005835	mmu-miR-1b-5p	Arpp19	59046	ENSMUSG00000007656	0.844
diana_microt	MIMAT0005835	mmu-miR-1b-5p	Fat3	270120	ENSMUSG00000074505	0.843
diana_microt	MIMAT0005835	mmu-miR-1b-5p	Slc44a1	100434	ENSMUSG00000028412	0.843
diana_microt	MIMAT0005835	mmu-miR-1b-5p	Zfp560	434377	ENSMUSG00000045519	0.842
diana_microt	MIMAT0005835	mmu-miR-1b-5p	Trim23	81003	ENSMUSG00000021712	0.842
diana_microt	MIMAT0005835	mmu-miR-1b-5p	Rfx3	19726	ENSMUSG00000040929	0.842
diana_microt	MIMAT0005835	mmu-miR-1b-5p	Grhl1	195733	ENSMUSG00000020656	0.842
diana_microt	MIMAT0005835	mmu-miR-1b-5p	C86695	97476	ENSMUSG00000079112	0.841
diana_microt	MIMAT0005835	mmu-miR-1b-5p	Cops2	12848	ENSMUSG00000027206	0.841
diana_microt	MIMAT0005835	mmu-miR-1b-5p	Smurf2	66313	ENSMUSG00000018363	0.84
diana_microt	MIMAT0005835	mmu-miR-1b-5p	C030046E11Rik	226089	ENSMUSG00000038658	0.839
diana_microt	MIMAT0005835	mmu-miR-1b-5p	Arhgap32	330914	ENSMUSG00000041444	0.838
diana_microt	MIMAT0005835	mmu-miR-1b-5p	Kpna1	16646	ENSMUSG00000022905	0.837
diana_microt	MIMAT0005835	mmu-miR-1b-5p	Pcdh17	219228	ENSMUSG00000035566	0.837
diana_microt	MIMAT0005835	mmu-miR-1b-5p	Akap7	432442	ENSMUSG00000039166	0.837
diana_microt	MIMAT0005835	mmu-miR-1b-5p	Suco	226551	ENSMUSG00000040297	0.837
diana_microt	MIMAT0005835	mmu-miR-1b-5p	Gria3	53623	ENSMUSG00000001986	0.836
diana_microt	MIMAT0005835	mmu-miR-1b-5p	Spn	20737	ENSMUSG00000051457	0.836
diana_microt	MIMAT0005835	mmu-miR-1b-5p	Ikzf2	22779	ENSMUSG00000025997	0.835
diana_microt	MIMAT0005835	mmu-miR-1b-5p	Pax9	18511	ENSMUSG00000001497	0.835
diana_microt	MIMAT0005835	mmu-miR-1b-5p	Lrrfip1	16978	ENSMUSG00000026305	0.835
diana_microt	MIMAT0005835	mmu-miR-1b-5p	Ppp1r9b	217124	ENSMUSG00000038976	0.835
diana_microt	MIMAT0005835	mmu-miR-1b-5p	Ankrd1	107765	ENSMUSG00000024803	0.834
diana_microt	MIMAT0005835	mmu-miR-1b-5p	Dimt1	66254	ENSMUSG00000021692	0.833
diana_microt	MIMAT0005835	mmu-miR-1b-5p	C77370	245555	ENSMUSG00000046449	0.833
diana_microt	MIMAT0005835	mmu-miR-1b-5p	Satb2	212712	ENSMUSG00000038331	0.832
diana_microt	MIMAT0005835	mmu-miR-1b-5p	Gm14418		ENSMUSG00000078867	0.831
diana_microt	MIMAT0005835	mmu-miR-1b-5p	Tbl1xr1	81004	ENSMUSG00000027630	0.83
diana_microt	MIMAT0005835	mmu-miR-1b-5p	Sox21	223227	ENSMUSG00000061517	0.83
diana_microt	MIMAT0005835	mmu-miR-1b-5p	Rhoq	104215	ENSMUSG00000024143	0.83
diana_microt	MIMAT0005835	mmu-miR-1b-5p	Plekha2	83436	ENSMUSG00000031557	0.83
diana_microt	MIMAT0005835	mmu-miR-1b-5p	Ppil4	67418	ENSMUSG00000015757	0.829
diana_microt	MIMAT0005835	mmu-miR-1b-5p	Csn1s2b	12992	ENSMUSG00000061388	0.829
diana_microt	MIMAT0005835	mmu-miR-1b-5p	Dock4	238130	ENSMUSG00000035954	0.829
diana_microt	MIMAT0005835	mmu-miR-1b-5p	Pkd2	18764	ENSMUSG00000034462	0.828
diana_microt	MIMAT0005835	mmu-miR-1b-5p	Cntn5	244682	ENSMUSG00000039488	0.828
diana_microt	MIMAT0005835	mmu-miR-1b-5p	Aspm	12316	ENSMUSG00000033952	0.828
diana_microt	MIMAT0005835	mmu-miR-1b-5p	Fndc3b	72007	ENSMUSG00000039286	0.828
diana_microt	MIMAT0005835	mmu-miR-1b-5p	Tshz2	228911	ENSMUSG00000047907	0.827
diana_microt	MIMAT0005835	mmu-miR-1b-5p	Sdpr	20324	ENSMUSG00000045954	0.827
diana_microt	MIMAT0005835	mmu-miR-1b-5p	AI182371	98870	ENSMUSG00000035875	0.826
diana_microt	MIMAT0005835	mmu-miR-1b-5p	Pitpnb	56305	ENSMUSG00000050017	0.825
diana_microt	MIMAT0005835	mmu-miR-1b-5p	Alg5	66248	ENSMUSG00000036632	0.825
diana_microt	MIMAT0005835	mmu-miR-1b-5p	Cntn3	18488	ENSMUSG00000030075	0.823
diana_microt	MIMAT0005835	mmu-miR-1b-5p	Vmn2r82	624845	ENSMUSG00000091468	0.823
diana_microt	MIMAT0005835	mmu-miR-1b-5p	Irgm2	54396	ENSMUSG00000069874	0.822
diana_microt	MIMAT0005835	mmu-miR-1b-5p	Daam1	208846	ENSMUSG00000034574	0.822
diana_microt	MIMAT0005835	mmu-miR-1b-5p	Piwil4	330890	ENSMUSG00000036912	0.822
diana_microt	MIMAT0005835	mmu-miR-1b-5p	Sbno1	243272	ENSMUSG00000038095	0.821
diana_microt	MIMAT0005835	mmu-miR-1b-5p	Vash2	226841	ENSMUSG00000037568	0.82
diana_microt	MIMAT0005835	mmu-miR-1b-5p	Tbp	21374	ENSMUSG00000014767	0.82
diana_microt	MIMAT0005835	mmu-miR-1b-5p	Atp2b4	381290	ENSMUSG00000026463	0.818
diana_microt	MIMAT0005835	mmu-miR-1b-5p	Dcn	13179	ENSMUSG00000019929	0.818
diana_microt	MIMAT0005835	mmu-miR-1b-5p	Phf17	269424	ENSMUSG00000025764	0.818
diana_microt	MIMAT0005835	mmu-miR-1b-5p	Zfp449	78619	ENSMUSG00000073176	0.817
diana_microt	MIMAT0005835	mmu-miR-1b-5p	Ttc8	76260	ENSMUSG00000021013	0.817
diana_microt	MIMAT0005835	mmu-miR-1b-5p	G2e3	217558	ENSMUSG00000035293	0.817
diana_microt	MIMAT0005835	mmu-miR-1b-5p	Hsdl2	72479	ENSMUSG00000028383	0.817
diana_microt	MIMAT0005835	mmu-miR-1b-5p	Zfp503	218820	ENSMUSG00000039081	0.815
diana_microt	MIMAT0005835	mmu-miR-1b-5p	Gls	14660	ENSMUSG00000026103	0.814
diana_microt	MIMAT0005835	mmu-miR-1b-5p	Tns1	21961	ENSMUSG00000055322	0.814
diana_microt	MIMAT0005835	mmu-miR-1b-5p	Fam104a	28081	ENSMUSG00000041629	0.813
diana_microt	MIMAT0005835	mmu-miR-1b-5p	Ubr5	70790	ENSMUSG00000037487	0.813
diana_microt	MIMAT0005835	mmu-miR-1b-5p	Hlf	217082	ENSMUSG00000003949	0.812
diana_microt	MIMAT0005835	mmu-miR-1b-5p	AI606181		ENSMUSG00000074873	0.811
diana_microt	MIMAT0005835	mmu-miR-1b-5p	Setbp1	240427	ENSMUSG00000024548	0.811
diana_microt	MIMAT0005835	mmu-miR-1b-5p	Nfat5	54446	ENSMUSG00000003847	0.811
diana_microt	MIMAT0005835	mmu-miR-1b-5p	Spred1	114715	ENSMUSG00000027351	0.811
diana_microt	MIMAT0005835	mmu-miR-1b-5p	Klf15	66277	ENSMUSG00000030087	0.811
diana_microt	MIMAT0005835	mmu-miR-1b-5p	Clasp2	76499	ENSMUSG00000033392	0.811
diana_microt	MIMAT0005835	mmu-miR-1b-5p	Csnk1g1	214897	ENSMUSG00000032384	0.81
diana_microt	MIMAT0005835	mmu-miR-1b-5p	Zfp36l2	12193	ENSMUSG00000045817	0.81
diana_microt	MIMAT0005835	mmu-miR-1b-5p	Zbtb10	229055	ENSMUSG00000069114	0.81
diana_microt	MIMAT0005835	mmu-miR-1b-5p	Klhl14	225266	ENSMUSG00000042514	0.81
diana_microt	MIMAT0005835	mmu-miR-1b-5p	Mcm3	17215	ENSMUSG00000041859	0.81
diana_microt	MIMAT0005835	mmu-miR-1b-5p	Vav2	22325	ENSMUSG00000009621	0.809
diana_microt	MIMAT0005835	mmu-miR-1b-5p	Kbtbd2	210973	ENSMUSG00000059486	0.809
diana_microt	MIMAT0005835	mmu-miR-1b-5p	Gtf2b	229906	ENSMUSG00000028271	0.809
diana_microt	MIMAT0005835	mmu-miR-1b-5p	Rgmb	68799	ENSMUSG00000048027	0.809
diana_microt	MIMAT0005835	mmu-miR-1b-5p	Mfsd2a	76574	ENSMUSG00000028655	0.809
diana_microt	MIMAT0005835	mmu-miR-1b-5p	Tub	22141	ENSMUSG00000031028	0.809
diana_microt	MIMAT0005835	mmu-miR-1b-5p	Bcl2l11	12125	ENSMUSG00000027381	0.808
diana_microt	MIMAT0005835	mmu-miR-1b-5p	Rasa2	114713	ENSMUSG00000032413	0.807
diana_microt	MIMAT0005835	mmu-miR-1b-5p	Zic1	22771	ENSMUSG00000032368	0.806
diana_microt	MIMAT0005835	mmu-miR-1b-5p	Bcl11b	58208	ENSMUSG00000048251	0.806
diana_microt	MIMAT0005835	mmu-miR-1b-5p	Cpeb4	67579	ENSMUSG00000020300	0.806
diana_microt	MIMAT0005835	mmu-miR-1b-5p	Zmynd11	66505	ENSMUSG00000021156	0.806
diana_microt	MIMAT0005835	mmu-miR-1b-5p	Tpbpa	21984	ENSMUSG00000033834	0.806
diana_microt	MIMAT0005835	mmu-miR-1b-5p	Nr1d2	353187	ENSMUSG00000021775	0.805
diana_microt	MIMAT0005835	mmu-miR-1b-5p	Insm2	56856	ENSMUSG00000045440	0.805
diana_microt	MIMAT0005835	mmu-miR-1b-5p	Iltifb	116849	ENSMUSG00000090461	0.805
diana_microt	MIMAT0005835	mmu-miR-1b-5p	Rgs5	19737	ENSMUSG00000026678	0.805
diana_microt	MIMAT0005835	mmu-miR-1b-5p	Rnaseh2a	69724	ENSMUSG00000052926	0.804
diana_microt	MIMAT0005835	mmu-miR-1b-5p	Slc35e2	320541	ENSMUSG00000042202	0.804
diana_microt	MIMAT0005835	mmu-miR-1b-5p	Snx6	72183	ENSMUSG00000005656	0.804
diana_microt	MIMAT0005835	mmu-miR-1b-5p	Ylpm1	56531	ENSMUSG00000021244	0.804
diana_microt	MIMAT0005835	mmu-miR-1b-5p	Apbb2	11787	ENSMUSG00000029207	0.803
diana_microt	MIMAT0005835	mmu-miR-1b-5p	Cd40	21939	ENSMUSG00000017652	0.803
diana_microt	MIMAT0005835	mmu-miR-1b-5p	Med12l	329650	ENSMUSG00000056476	0.803
diana_microt	MIMAT0005835	mmu-miR-1b-5p	Eya1	14048	ENSMUSG00000025932	0.803
diana_microt	MIMAT0005835	mmu-miR-1b-5p	Stag2	20843	ENSMUSG00000025862	0.803
diana_microt	MIMAT0005835	mmu-miR-1b-5p	Zcchc2	227449	ENSMUSG00000038866	0.803
diana_microt	MIMAT0005835	mmu-miR-1b-5p	Ccdc64	75665	ENSMUSG00000041609	0.803
diana_microt	MIMAT0005835	mmu-miR-1b-5p	Plxnc1	54712	ENSMUSG00000074785	0.802
diana_microt	MIMAT0005835	mmu-miR-1b-5p	Cbll1	104836	ENSMUSG00000020659	0.802
diana_microt	MIMAT0005835	mmu-miR-1b-5p	B3galt2	26878	ENSMUSG00000033849	0.802
diana_microt	MIMAT0005835	mmu-miR-1b-5p	Arhgap15	76117	ENSMUSG00000049744	0.802
diana_microt	MIMAT0005835	mmu-miR-1b-5p	Ttll7	70892	ENSMUSG00000036745	0.801
diana_microt	MIMAT0005835	mmu-miR-1b-5p	St18	240690	ENSMUSG00000033740	0.8
diana_microt	MIMAT0005835	mmu-miR-1b-5p	Med13l	76199	ENSMUSG00000018076	0.799
diana_microt	MIMAT0005835	mmu-miR-1b-5p	Snai2	20583	ENSMUSG00000022676	0.799
diana_microt	MIMAT0005835	mmu-miR-1b-5p	Pitx2	18741	ENSMUSG00000028023	0.799
diana_microt	MIMAT0005835	mmu-miR-1b-5p	Slc11a2	18174	ENSMUSG00000023030	0.799
diana_microt	MIMAT0005835	mmu-miR-1b-5p	Dach2	93837	ENSMUSG00000025592	0.799
diana_microt	MIMAT0005835	mmu-miR-1b-5p	Herc6	67138	ENSMUSG00000029798	0.798
diana_microt	MIMAT0005835	mmu-miR-1b-5p	Pdgfrl	68797	ENSMUSG00000031595	0.798
diana_microt	MIMAT0005835	mmu-miR-1b-5p	Arpc5l	74192	ENSMUSG00000026755	0.797
diana_microt	MIMAT0005835	mmu-miR-1b-5p	Crebzf	233490	ENSMUSG00000051451	0.796
diana_microt	MIMAT0005835	mmu-miR-1b-5p	Sh2b3	16923	ENSMUSG00000042594	0.796
diana_microt	MIMAT0005835	mmu-miR-1b-5p	Stxbp6	217517	ENSMUSG00000046314	0.796
diana_microt	MIMAT0005835	mmu-miR-1b-5p	Comtd1	69156	ENSMUSG00000021773	0.794
diana_microt	MIMAT0005835	mmu-miR-1b-5p	Gria2	14800	ENSMUSG00000033981	0.794
diana_microt	MIMAT0005835	mmu-miR-1b-5p	Grm1	14816	ENSMUSG00000019828	0.793
diana_microt	MIMAT0005835	mmu-miR-1b-5p	Rsbn1l	242860	ENSMUSG00000039968	0.793
diana_microt	MIMAT0005835	mmu-miR-1b-5p	Rnf31	268749	ENSMUSG00000047098	0.793
diana_microt	MIMAT0005835	mmu-miR-1b-5p	Emr4	52614	ENSMUSG00000032915	0.793
diana_microt	MIMAT0005835	mmu-miR-1b-5p	Sp1	20683	ENSMUSG00000001280	0.793
diana_microt	MIMAT0005835	mmu-miR-1b-5p	B3galt1	26877	ENSMUSG00000034780	0.792
diana_microt	MIMAT0005835	mmu-miR-1b-5p	Pak2	224105	ENSMUSG00000022781	0.791
diana_microt	MIMAT0005835	mmu-miR-1b-5p	Cep110	26920	ENSMUSG00000057110	0.791
diana_microt	MIMAT0005835	mmu-miR-1b-5p	Irf2bp2	270110	ENSMUSG00000051495	0.791
diana_microt	MIMAT0005835	mmu-miR-1b-5p	Dip2c	208440	ENSMUSG00000048264	0.79
diana_microt	MIMAT0005835	mmu-miR-1b-5p	Dleu7	239133	ENSMUSG00000048281	0.79
diana_microt	MIMAT0005835	mmu-miR-1b-5p	Tmem131	56030	ENSMUSG00000026116	0.79
diana_microt	MIMAT0005835	mmu-miR-1b-5p	Kif16b	16558	ENSMUSG00000038844	0.789
diana_microt	MIMAT0005835	mmu-miR-1b-5p	Cdk13	69562	ENSMUSG00000041297	0.789
diana_microt	MIMAT0005835	mmu-miR-1b-5p	Hsd17b12	56348	ENSMUSG00000027195	0.789
diana_microt	MIMAT0005835	mmu-miR-1b-5p	Slitrk2	245450	ENSMUSG00000036790	0.789
diana_microt	MIMAT0005835	mmu-miR-1b-5p	Gm13089		ENSMUSG00000070617	0.789
diana_microt	MIMAT0005835	mmu-miR-1b-5p	Topbp1	235559	ENSMUSG00000032555	0.788
diana_microt	MIMAT0005835	mmu-miR-1b-5p	Nom1	433864	ENSMUSG00000001569	0.788
diana_microt	MIMAT0005835	mmu-miR-1b-5p	AI597479	98404	ENSMUSG00000010290	0.788
diana_microt	MIMAT0005835	mmu-miR-1b-5p	Slc5a7	63993	ENSMUSG00000023945	0.787
diana_microt	MIMAT0005835	mmu-miR-1b-5p	Clspn	269582	ENSMUSG00000042489	0.787
diana_microt	MIMAT0005835	mmu-miR-1b-5p	Wif1	24117	ENSMUSG00000020218	0.787
diana_microt	MIMAT0005835	mmu-miR-1b-5p	Arhgap12	75415	ENSMUSG00000041225	0.786
diana_microt	MIMAT0005835	mmu-miR-1b-5p	Homer2	26557	ENSMUSG00000025813	0.786
diana_microt	MIMAT0005835	mmu-miR-1b-5p	Wasl	73178	ENSMUSG00000029684	0.786
diana_microt	MIMAT0005835	mmu-miR-1b-5p	Hspa13	110920	ENSMUSG00000032932	0.785
diana_microt	MIMAT0005835	mmu-miR-1b-5p	Col11a1	12814	ENSMUSG00000027966	0.785
diana_microt	MIMAT0005835	mmu-miR-1b-5p	Ccpg1	72278	ENSMUSG00000034563	0.785
diana_microt	MIMAT0005835	mmu-miR-1b-5p	Atoh1	11921	ENSMUSG00000073043	0.785
diana_microt	MIMAT0005835	mmu-miR-1b-5p	Hook3	320191	ENSMUSG00000037234	0.785
diana_microt	MIMAT0005835	mmu-miR-1b-5p	Acss2	60525	ENSMUSG00000027605	0.784
diana_microt	MIMAT0005835	mmu-miR-1b-5p	Pou4f1	18996	ENSMUSG00000048349	0.784
diana_microt	MIMAT0005835	mmu-miR-1b-5p	Zfp458	238690	ENSMUSG00000055480	0.783
diana_microt	MIMAT0005835	mmu-miR-1b-5p	Tmem108	81907	ENSMUSG00000042757	0.783
diana_microt	MIMAT0005835	mmu-miR-1b-5p	Six4	20474	ENSMUSG00000034460	0.782
diana_microt	MIMAT0005835	mmu-miR-1b-5p	Eef2k	13631	ENSMUSG00000035064	0.781
diana_microt	MIMAT0005835	mmu-miR-1b-5p	Mblac2	72852	ENSMUSG00000051098	0.781
diana_microt	MIMAT0005835	mmu-miR-1b-5p	Fam26e	103511	ENSMUSG00000049872	0.781
diana_microt	MIMAT0005835	mmu-miR-1b-5p	Gmfb	63985	ENSMUSG00000062014	0.781
diana_microt	MIMAT0005835	mmu-miR-1b-5p	Apaf1	11783	ENSMUSG00000019979	0.781
diana_microt	MIMAT0005835	mmu-miR-1b-5p	Adam17	11491	ENSMUSG00000052593	0.78
diana_microt	MIMAT0005835	mmu-miR-1b-5p	Hspa4l	18415	ENSMUSG00000025757	0.779
diana_microt	MIMAT0005835	mmu-miR-1b-5p	1190002N15Rik	68861	ENSMUSG00000045414	0.779
diana_microt	MIMAT0005835	mmu-miR-1b-5p	Zbtb18	30928	ENSMUSG00000063659	0.779
diana_microt	MIMAT0005835	mmu-miR-1b-5p	Picalm	233489	ENSMUSG00000039361	0.779
diana_microt	MIMAT0005835	mmu-miR-1b-5p	Edil3	13612	ENSMUSG00000034488	0.779
diana_microt	MIMAT0005835	mmu-miR-1b-5p	Smim13	108934	ENSMUSG00000091264	0.778
diana_microt	MIMAT0005835	mmu-miR-1b-5p	Socs5	56468	ENSMUSG00000037104	0.776
diana_microt	MIMAT0005835	mmu-miR-1b-5p	Ccni	12453	ENSMUSG00000063015	0.776
diana_microt	MIMAT0005835	mmu-miR-1b-5p	Zfp874b	408067	ENSMUSG00000059839	0.776
diana_microt	MIMAT0005835	mmu-miR-1b-5p	Ndnl2	66647	ENSMUSG00000070520	0.776
diana_microt	MIMAT0005835	mmu-miR-1b-5p	Trp53inp2	68728	ENSMUSG00000038375	0.776
diana_microt	MIMAT0005835	mmu-miR-1b-5p	Zrsr2	22184	ENSMUSG00000031370	0.776
diana_microt	MIMAT0005835	mmu-miR-1b-5p	Aff4	93736	ENSMUSG00000049470	0.775
diana_microt	MIMAT0005835	mmu-miR-1b-5p	Zfp953	629016	ENSMUSG00000056552	0.775
diana_microt	MIMAT0005835	mmu-miR-1b-5p	Pde10a	23984	ENSMUSG00000023868	0.775
diana_microt	MIMAT0005835	mmu-miR-1b-5p	Fam35a	75698	ENSMUSG00000041471	0.774
diana_microt	MIMAT0005835	mmu-miR-1b-5p	Pck1	18534	ENSMUSG00000027513	0.774
diana_microt	MIMAT0005835	mmu-miR-1b-5p	Sirt1	93759	ENSMUSG00000020063	0.773
diana_microt	MIMAT0005835	mmu-miR-1b-5p	Loxl3	16950	ENSMUSG00000000693	0.773
diana_microt	MIMAT0005835	mmu-miR-1b-5p	Gad1	14415	ENSMUSG00000070880	0.773
diana_microt	MIMAT0005835	mmu-miR-1b-5p	Phf20	228829	ENSMUSG00000038116	0.773
diana_microt	MIMAT0005835	mmu-miR-1b-5p	Cbfb	12400	ENSMUSG00000031885	0.773
diana_microt	MIMAT0005835	mmu-miR-1b-5p	Tmigd1	66601	ENSMUSG00000020839	0.773
diana_microt	MIMAT0005835	mmu-miR-1b-5p	Clptm1l	218335	ENSMUSG00000021610	0.772
diana_microt	MIMAT0005835	mmu-miR-1b-5p	Brip1	237911	ENSMUSG00000034329	0.772
diana_microt	MIMAT0005835	mmu-miR-1b-5p	Dnph1	381101	ENSMUSG00000040658	0.771
diana_microt	MIMAT0005835	mmu-miR-1b-5p	Akr1c14	105387	ENSMUSG00000033715	0.771
diana_microt	MIMAT0005835	mmu-miR-1b-5p	Arfgef2	99371	ENSMUSG00000074582	0.77
diana_microt	MIMAT0005835	mmu-miR-1b-5p	Hsph1	15505	ENSMUSG00000029657	0.769
diana_microt	MIMAT0005835	mmu-miR-1b-5p	Otud6b	72201	ENSMUSG00000040550	0.769
diana_microt	MIMAT0005835	mmu-miR-1b-5p	Herpud1	64209	ENSMUSG00000031770	0.768
diana_microt	MIMAT0005835	mmu-miR-1b-5p	Tmem215	320500	ENSMUSG00000046593	0.768
diana_microt	MIMAT0005835	mmu-miR-1b-5p	Adam22	11496	ENSMUSG00000040537	0.768
diana_microt	MIMAT0005835	mmu-miR-1b-5p	Arl6ip6	65103	ENSMUSG00000026960	0.767
diana_microt	MIMAT0005835	mmu-miR-1b-5p	Zfp71-rs1	235907	ENSMUSG00000071281	0.767
diana_microt	MIMAT0005835	mmu-miR-1b-5p	4930524B15Rik	67592	ENSMUSG00000020299	0.767
diana_microt	MIMAT0005835	mmu-miR-1b-5p	Cenpf	108000	ENSMUSG00000026605	0.766
diana_microt	MIMAT0005835	mmu-miR-1b-5p	Mllt11	56772	ENSMUSG00000053192	0.766
diana_microt	MIMAT0005835	mmu-miR-1b-5p	Lrrtm3	216028	ENSMUSG00000042846	0.765
diana_microt	MIMAT0005835	mmu-miR-1b-5p	Slc22a23	73102	ENSMUSG00000038267	0.764
diana_microt	MIMAT0005835	mmu-miR-1b-5p	Ubxn4	67812	ENSMUSG00000026353	0.764
diana_microt	MIMAT0005835	mmu-miR-1b-5p	Slc22a8	19879	ENSMUSG00000063796	0.764
diana_microt	MIMAT0005835	mmu-miR-1b-5p	Rmnd5a	68477	ENSMUSG00000002222	0.764
diana_microt	MIMAT0005835	mmu-miR-1b-5p	Dnaja1	15502	ENSMUSG00000028410	0.764
diana_microt	MIMAT0005835	mmu-miR-1b-5p	Rpgr	19893	ENSMUSG00000031174	0.764
diana_microt	MIMAT0005835	mmu-miR-1b-5p	Nr2f2	11819	ENSMUSG00000030551	0.763
diana_microt	MIMAT0005835	mmu-miR-1b-5p	Cers6	241447	ENSMUSG00000027035	0.763
diana_microt	MIMAT0005835	mmu-miR-1b-5p	Lrrc42	77809	ENSMUSG00000028617	0.763
diana_microt	MIMAT0005835	mmu-miR-1b-5p	Gabpb2	213054	ENSMUSG00000038766	0.763
diana_microt	MIMAT0005835	mmu-miR-1b-5p	Rev3l	19714	ENSMUSG00000019841	0.763
diana_microt	MIMAT0005835	mmu-miR-1b-5p	Gm10483		ENSMUSG00000073231	0.763
diana_microt	MIMAT0005835	mmu-miR-1b-5p	Gata3	14462	ENSMUSG00000015619	0.763
elmmo	MIMAT0005835	mmu-miR-1b-5p	Sox9	20682	ENSMUSG00000000567	0.611
elmmo	MIMAT0005835	mmu-miR-1b-5p	Tfap2b	21419	ENSMUSG00000025927	0.611
elmmo	MIMAT0005835	mmu-miR-1b-5p	Npm1	18148	ENSMUSG00000057113	0.611
elmmo	MIMAT0005835	mmu-miR-1b-5p	Fzd7	14369	ENSMUSG00000041075	0.611
elmmo	MIMAT0005835	mmu-miR-1b-5p	Zfp148	22661	ENSMUSG00000022811	0.611
elmmo	MIMAT0005835	mmu-miR-1b-5p	Neurog2	11924	ENSMUSG00000027967	0.611
elmmo	MIMAT0005835	mmu-miR-1b-5p	Tns3	319939	ENSMUSG00000020422	0.611
elmmo	MIMAT0005835	mmu-miR-1b-5p	Chd2	244059	ENSMUSG00000078671	0.611
elmmo	MIMAT0005835	mmu-miR-1b-5p	Bcl11b	58208	ENSMUSG00000048251	0.611
elmmo	MIMAT0005835	mmu-miR-1b-5p	Npm1	100046628	ENSMUSG00000057113	0.611
elmmo	MIMAT0005835	mmu-miR-1b-5p	Fbxo11	225055	ENSMUSG00000005371	0.601
elmmo	MIMAT0005835	mmu-miR-1b-5p	Nr4a2	18227	ENSMUSG00000026826	0.569
elmmo	MIMAT0005835	mmu-miR-1b-5p	Gsk3b	56637	ENSMUSG00000022812	0.569
elmmo	MIMAT0005835	mmu-miR-1b-5p	Arid1b	239985	ENSMUSG00000069729	0.569
elmmo	MIMAT0005835	mmu-miR-1b-5p	Rybp	56353	ENSMUSG00000072872	0.569
elmmo	MIMAT0005835	mmu-miR-1b-5p	Phf20l1	239510	ENSMUSG00000072501	0.569
elmmo	MIMAT0005835	mmu-miR-1b-5p	Zfpm2	22762	ENSMUSG00000022306	0.569
elmmo	MIMAT0005835	mmu-miR-1b-5p	Pbrm1	66923	ENSMUSG00000042323	0.569
elmmo	MIMAT0005835	mmu-miR-1b-5p	Kat6a	244349	ENSMUSG00000031540	0.569
elmmo	MIMAT0005835	mmu-miR-1b-5p	Itpr1	16438	ENSMUSG00000030102	0.569
elmmo	MIMAT0005835	mmu-miR-1b-5p	Lmo3	109593	ENSMUSG00000030226	0.569
elmmo	MIMAT0005835	mmu-miR-1b-5p	Srsf5	20384	ENSMUSG00000021134	0.569
elmmo	MIMAT0005835	mmu-miR-1b-5p	Cask	12361	ENSMUSG00000031012	0.569
elmmo	MIMAT0005835	mmu-miR-1b-5p	Ylpm1	56531	ENSMUSG00000021244	0.569
elmmo	MIMAT0005835	mmu-miR-1b-5p	Ube3a	22215	ENSMUSG00000025326	0.569
elmmo	MIMAT0005835	mmu-miR-1b-5p	Tra2b	20462	ENSMUSG00000022858	0.569
elmmo	MIMAT0005835	mmu-miR-1b-5p	Med13l	76199	ENSMUSG00000018076	0.569
elmmo	MIMAT0005835	mmu-miR-1b-5p	Gtf2b	229906	ENSMUSG00000028271	0.569
elmmo	MIMAT0005835	mmu-miR-1b-5p	Dab2ip	69601	ENSMUSG00000026883	0.569
elmmo	MIMAT0005835	mmu-miR-1b-5p	Setbp1	240427	ENSMUSG00000024548	0.569
elmmo	MIMAT0005835	mmu-miR-1b-5p	Birc6	12211	ENSMUSG00000024073	0.569
elmmo	MIMAT0005835	mmu-miR-1b-5p	Ccnt2	72949	ENSMUSG00000026349	0.569
elmmo	MIMAT0005835	mmu-miR-1b-5p	Qk	19317	ENSMUSG00000062078	0.569
elmmo	MIMAT0005835	mmu-miR-1b-5p	Klf15	66277	ENSMUSG00000030087	0.569
elmmo	MIMAT0005835	mmu-miR-1b-5p	Runx1t1	12395	ENSMUSG00000006586	0.569
elmmo	MIMAT0005835	mmu-miR-1b-5p	Syncrip	56403	ENSMUSG00000032423	0.569
elmmo	MIMAT0005835	mmu-miR-1b-5p	Nr3c2	110784	ENSMUSG00000031618	0.569
elmmo	MIMAT0005835	mmu-miR-1b-5p	Rev1	56210	ENSMUSG00000026082	0.569
elmmo	MIMAT0005835	mmu-miR-1b-5p	Ubr5	70790	ENSMUSG00000037487	0.569
elmmo	MIMAT0005835	mmu-miR-1b-5p	Phip	83946	ENSMUSG00000032253	0.569
elmmo	MIMAT0005835	mmu-miR-1b-5p	Ptprs	19280	ENSMUSG00000013236	0.569
elmmo	MIMAT0005835	mmu-miR-1b-5p	Emx2	13797	ENSMUSG00000043969	0.569
elmmo	MIMAT0005835	mmu-miR-1b-5p	Onecut2	225631	ENSMUSG00000045991	0.569
elmmo	MIMAT0005835	mmu-miR-1b-5p	Stag2	20843	ENSMUSG00000025862	0.569
elmmo	MIMAT0005835	mmu-miR-1b-5p	Epc2	227867	ENSMUSG00000069495	0.569
elmmo	MIMAT0005835	mmu-miR-1b-5p	Fbxo33	70611	ENSMUSG00000035329	0.569
elmmo	MIMAT0005835	mmu-miR-1b-5p	Rab1	19324	ENSMUSG00000020149	0.569
elmmo	MIMAT0005835	mmu-miR-1b-5p	Asxl2	75302	ENSMUSG00000037486	0.569
elmmo	MIMAT0005835	mmu-miR-1b-5p	Cxxc4	319478	ENSMUSG00000044365	0.569
elmmo	MIMAT0005835	mmu-miR-1b-5p	Lhx5	16873	ENSMUSG00000029595	0.569
elmmo	MIMAT0005835	mmu-miR-1b-5p	Zfp503	218820	ENSMUSG00000039081	0.569
elmmo	MIMAT0005835	mmu-miR-1b-5p	Ehf	13661	ENSMUSG00000012350	0.569
elmmo	MIMAT0005835	mmu-miR-1b-5p	Zfhx4	80892	ENSMUSG00000025255	0.569
elmmo	MIMAT0005835	mmu-miR-1b-5p	Mapk8ip3	30957	ENSMUSG00000024163	0.569
elmmo	MIMAT0005835	mmu-miR-1b-5p	Snx6	72183	ENSMUSG00000005656	0.569
elmmo	MIMAT0005835	mmu-miR-1b-5p	Rnf44	105239	ENSMUSG00000034928	0.569
elmmo	MIMAT0005835	mmu-miR-1b-5p	Cramp1l	57354	ENSMUSG00000038002	0.569
elmmo	MIMAT0005835	mmu-miR-1b-5p	Runx1	12394	ENSMUSG00000022952	0.569
elmmo	MIMAT0005835	mmu-miR-1b-5p	Rybp	628746	ENSMUSG00000072872	0.569
elmmo	MIMAT0005835	mmu-miR-1b-5p	Hnrnpu	51810	ENSMUSG00000039630	0.569
elmmo	MIMAT0005835	mmu-miR-1b-5p	Zeb1	21417	ENSMUSG00000024238	0.569
elmmo	MIMAT0005835	mmu-miR-1b-5p	Lemd3	380664	ENSMUSG00000048661	0.569
elmmo	MIMAT0005835	mmu-miR-1b-5p	Jun	16476	ENSMUSG00000052684	0.569
elmmo	MIMAT0005835	mmu-miR-1b-5p	Ctdspl2	329506	ENSMUSG00000033411	0.569
elmmo	MIMAT0005835	mmu-miR-1b-5p	Cdh11	12552	ENSMUSG00000031673	0.569
elmmo	MIMAT0005835	mmu-miR-1b-5p	Lrrtm3	216028	ENSMUSG00000042846	0.569
elmmo	MIMAT0005835	mmu-miR-1b-5p	Cnot2	72068	ENSMUSG00000020166	0.569
elmmo	MIMAT0005835	mmu-miR-1b-5p	Tbx15	21384	ENSMUSG00000027868	0.569
elmmo	MIMAT0005835	mmu-miR-1b-5p	Papolg	216578	ENSMUSG00000020273	0.569
elmmo	MIMAT0005835	mmu-miR-1b-5p	Magi1	14924	ENSMUSG00000045095	0.569
elmmo	MIMAT0005835	mmu-miR-1b-5p	Picalm	233489	ENSMUSG00000039361	0.569
elmmo	MIMAT0005835	mmu-miR-1b-5p	Zfp36l2	12193	ENSMUSG00000045817	0.569
elmmo	MIMAT0005835	mmu-miR-1b-5p	Gata3	14462	ENSMUSG00000015619	0.569
elmmo	MIMAT0005835	mmu-miR-1b-5p	Foxp2	114142	ENSMUSG00000029563	0.569
elmmo	MIMAT0005835	mmu-miR-1b-5p	Cdh2	12558	ENSMUSG00000024304	0.569
elmmo	MIMAT0005835	mmu-miR-1b-5p	Crebrf	77128	ENSMUSG00000048249	0.569
elmmo	MIMAT0005835	mmu-miR-1b-5p	Lmo4	16911	ENSMUSG00000028266	0.569
elmmo	MIMAT0005835	mmu-miR-1b-5p	Kctd4	67516	ENSMUSG00000046523	0.569
miranda	MIMAT0005835	mmu-miR-1b-5p	Rabggtb	19352	ENSMUSG00000038975	-1.3379
miranda	MIMAT0005835	mmu-miR-1b-5p	Brms1l	52592	ENSMUSG00000012076	-1.3376
miranda	MIMAT0005835	mmu-miR-1b-5p	Psmc6	67089	ENSMUSG00000021832	-1.3333
miranda	MIMAT0005835	mmu-miR-1b-5p	Ube2e3	22193	ENSMUSG00000027011	-1.333
miranda	MIMAT0005835	mmu-miR-1b-5p	Nampt	59027	ENSMUSG00000020572	-1.333
miranda	MIMAT0005835	mmu-miR-1b-5p	Figla	26910	ENSMUSG00000030001	-1.3302
miranda	MIMAT0005835	mmu-miR-1b-5p	Gabra2	14395	ENSMUSG00000000560	-1.3295
miranda	MIMAT0005835	mmu-miR-1b-5p	Tubgcp5	233276	ENSMUSG00000033790	-1.3258
miranda	MIMAT0005835	mmu-miR-1b-5p	Scg5	20394	ENSMUSG00000023236	-1.3253
miranda	MIMAT0005835	mmu-miR-1b-5p	Brms1l	52592	ENSMUSG00000012076	-1.3241
miranda	MIMAT0005835	mmu-miR-1b-5p	Npm1	18148	ENSMUSG00000057113	-1.3194
miranda	MIMAT0005835	mmu-miR-1b-5p	Hiat1	15247	ENSMUSG00000089911	-1.3161
miranda	MIMAT0005835	mmu-miR-1b-5p	Csnk1g3	70425	ENSMUSG00000073563	-1.3138
miranda	MIMAT0005835	mmu-miR-1b-5p	Psmc6	67089	ENSMUSG00000021832	-1.3133
miranda	MIMAT0005835	mmu-miR-1b-5p	Krit1	79264	ENSMUSG00000000600	-1.3089
miranda	MIMAT0005835	mmu-miR-1b-5p	Lin9	72568	ENSMUSG00000058729	-1.3086
miranda	MIMAT0005835	mmu-miR-1b-5p	Cntrob	216846	ENSMUSG00000032782	-1.3085
miranda	MIMAT0005835	mmu-miR-1b-5p	Iltifb	116849	ENSMUSG00000090461	-1.3068
miranda	MIMAT0005835	mmu-miR-1b-5p	Svil	225115	ENSMUSG00000024236	-1.3067
miranda	MIMAT0005835	mmu-miR-1b-5p	Crem	12916	ENSMUSG00000063889	-1.3064
miranda	MIMAT0005835	mmu-miR-1b-5p	Agbl3	76223	ENSMUSG00000038836	-1.3054
miranda	MIMAT0005835	mmu-miR-1b-5p	Hivep1	110521	ENSMUSG00000021366	-1.3054
miranda	MIMAT0005835	mmu-miR-1b-5p	Zfp804a	241514	ENSMUSG00000070866	-1.3028
miranda	MIMAT0005835	mmu-miR-1b-5p	Neurog2	11924	ENSMUSG00000027967	-1.2998
miranda	MIMAT0005835	mmu-miR-1b-5p	Lhx5	16873	ENSMUSG00000029595	-1.2975
miranda	MIMAT0005835	mmu-miR-1b-5p	Rab5a	271457	ENSMUSG00000017831	-1.2957
miranda	MIMAT0005835	mmu-miR-1b-5p	Armc4	74934	ENSMUSG00000061802	-1.2934
miranda	MIMAT0005835	mmu-miR-1b-5p	Wrnip1	78903	ENSMUSG00000021400	-1.2934
miranda	MIMAT0005835	mmu-miR-1b-5p	Atp6v1a	11964	ENSMUSG00000052459	-1.2918
miranda	MIMAT0005835	mmu-miR-1b-5p	Sntg1	71096	ENSMUSG00000025909	-1.2917
miranda	MIMAT0005835	mmu-miR-1b-5p	Arsj	271970	ENSMUSG00000046561	-1.2914
miranda	MIMAT0005835	mmu-miR-1b-5p	Nap1l1	53605	ENSMUSG00000058799	-1.29
miranda	MIMAT0005835	mmu-miR-1b-5p	Igf1	16000	ENSMUSG00000020053	-1.2892
miranda	MIMAT0005835	mmu-miR-1b-5p	Cog7	233824	ENSMUSG00000034951	-1.2878
miranda	MIMAT0005835	mmu-miR-1b-5p	Igf1	16000	ENSMUSG00000020053	-1.2875
miranda	MIMAT0005835	mmu-miR-1b-5p	Crem	12916	ENSMUSG00000063889	-1.2868
miranda	MIMAT0005835	mmu-miR-1b-5p	Neurog2	11924	ENSMUSG00000027967	-1.286
miranda	MIMAT0005835	mmu-miR-1b-5p	Lcor	212391	ENSMUSG00000025019	-1.2854
miranda	MIMAT0005835	mmu-miR-1b-5p	Rerg	232441	ENSMUSG00000030222	-1.2848
miranda	MIMAT0005835	mmu-miR-1b-5p	Slc25a30	67554	ENSMUSG00000022003	-1.2845
miranda	MIMAT0005835	mmu-miR-1b-5p	2310030G06Rik	66952	ENSMUSG00000032062	-1.2829
miranda	MIMAT0005835	mmu-miR-1b-5p		13386	ENSMUSG00000098411	-1.2829
miranda	MIMAT0005835	mmu-miR-1b-5p	Dlk1	13386	ENSMUSG00000040856	-1.2829
miranda	MIMAT0005835	mmu-miR-1b-5p		13386	ENSMUSG00000099116	-1.2829
miranda	MIMAT0005835	mmu-miR-1b-5p	Tspan3	56434	ENSMUSG00000032324	-1.2825
miranda	MIMAT0005835	mmu-miR-1b-5p	Zcchc18	66995	ENSMUSG00000031428	-1.2822
miranda	MIMAT0005835	mmu-miR-1b-5p	Wrap73	59002	ENSMUSG00000029029	-1.2816
miranda	MIMAT0005835	mmu-miR-1b-5p	Rab12	19328	ENSMUSG00000023460	-1.2816
miranda	MIMAT0005835	mmu-miR-1b-5p	Kmt2e	69188	ENSMUSG00000029004	-1.2813
miranda	MIMAT0005835	mmu-miR-1b-5p	Ppp1r21	73825	ENSMUSG00000034709	-1.2811
miranda	MIMAT0005835	mmu-miR-1b-5p	Pdgfrl	68797	ENSMUSG00000031595	-1.2805
miranda	MIMAT0005835	mmu-miR-1b-5p	Tlr4	21898	ENSMUSG00000039005	-1.2788
miranda	MIMAT0005835	mmu-miR-1b-5p	Rnf214	235315	ENSMUSG00000042790	-1.2774
miranda	MIMAT0005835	mmu-miR-1b-5p	Kif18a	228421	ENSMUSG00000027115	-1.277
miranda	MIMAT0005835	mmu-miR-1b-5p	Ptpn2	19255	ENSMUSG00000024539	-1.2769
miranda	MIMAT0005835	mmu-miR-1b-5p	E230019M04Rik	331537	ENSMUSG00000042433	-1.2762
miranda	MIMAT0005835	mmu-miR-1b-5p	Pdlim2	213019	ENSMUSG00000022090	-1.2756
miranda	MIMAT0005835	mmu-miR-1b-5p	Zfhx4	80892	ENSMUSG00000025255	-1.2753
miranda	MIMAT0005835	mmu-miR-1b-5p	Zic3	22773	ENSMUSG00000067860	-1.2752
miranda	MIMAT0005835	mmu-miR-1b-5p	Cab39	12283	ENSMUSG00000036707	-1.2747
miranda	MIMAT0005835	mmu-miR-1b-5p	D3Bwg0562e	229791	ENSMUSG00000044667	-1.2721
miranda	MIMAT0005835	mmu-miR-1b-5p	Pls3	102866	ENSMUSG00000016382	-1.2704
miranda	MIMAT0005835	mmu-miR-1b-5p	Arsj	271970	ENSMUSG00000046561	-1.2698
miranda	MIMAT0005835	mmu-miR-1b-5p	Dtna	13527	ENSMUSG00000024302	-1.2667
miranda	MIMAT0005835	mmu-miR-1b-5p	Ubr5	70790	ENSMUSG00000037487	-1.2653
miranda	MIMAT0005835	mmu-miR-1b-5p	Aftph	216549	ENSMUSG00000049659	-1.2649
miranda	MIMAT0005835	mmu-miR-1b-5p	Gm13089	277667		-1.2644
miranda	MIMAT0005835	mmu-miR-1b-5p	Ect2	13605	ENSMUSG00000027699	-1.2642
miranda	MIMAT0005835	mmu-miR-1b-5p	Grxcr1	433899	ENSMUSG00000068082	-1.2637
miranda	MIMAT0005835	mmu-miR-1b-5p	Cdc27	217232	ENSMUSG00000020687	-1.2626
miranda	MIMAT0005835	mmu-miR-1b-5p	Rbm33	381626	ENSMUSG00000048271	-1.2609
miranda	MIMAT0005835	mmu-miR-1b-5p	Vstm2b	58188	ENSMUSG00000039257	-1.2607
miranda	MIMAT0005835	mmu-miR-1b-5p	Mycbp	56309	ENSMUSG00000028647	-1.2607
miranda	MIMAT0005835	mmu-miR-1b-5p	Cab39	12283	ENSMUSG00000036707	-1.2605
miranda	MIMAT0005835	mmu-miR-1b-5p	Lin52	217708	ENSMUSG00000085793	-1.2598
miranda	MIMAT0005835	mmu-miR-1b-5p	Ap3s1	11777	ENSMUSG00000024480	-1.259
miranda	MIMAT0005835	mmu-miR-1b-5p	Eda	13607	ENSMUSG00000059327	-1.2557
miranda	MIMAT0005835	mmu-miR-1b-5p	Sostdc1	66042	ENSMUSG00000036169	-1.2557
miranda	MIMAT0005835	mmu-miR-1b-5p	Arhgap15	76117	ENSMUSG00000049744	-1.2534
miranda	MIMAT0005835	mmu-miR-1b-5p	Nipbl	71175	ENSMUSG00000022141	-1.2518
miranda	MIMAT0005835	mmu-miR-1b-5p	Hspa13	110920	ENSMUSG00000032932	-1.2516
miranda	MIMAT0005835	mmu-miR-1b-5p	Pnrc1	108767	ENSMUSG00000040128	-1.2508
miranda	MIMAT0005835	mmu-miR-1b-5p	Kdm2b	30841	ENSMUSG00000029475	-1.2507
miranda	MIMAT0005835	mmu-miR-1b-5p	Cetn3	12626	ENSMUSG00000021537	-1.2477
miranda	MIMAT0005835	mmu-miR-1b-5p	Hspa14	50497	ENSMUSG00000051396	-1.2466
miranda	MIMAT0005835	mmu-miR-1b-5p	Scn3a	20269	ENSMUSG00000057182	-1.2455
miranda	MIMAT0005835	mmu-miR-1b-5p	Klhl11	217194	ENSMUSG00000048732	-1.2453
miranda	MIMAT0005835	mmu-miR-1b-5p	Pxt1	69307	ENSMUSG00000045378	-1.2452
miranda	MIMAT0005835	mmu-miR-1b-5p	Sfpq	71514	ENSMUSG00000028820	-1.2442
miranda	MIMAT0005835	mmu-miR-1b-5p	Fbxl14	101358	ENSMUSG00000030019	-1.2437
miranda	MIMAT0005835	mmu-miR-1b-5p	Gnpda2	67980	ENSMUSG00000029209	-1.2434
miranda	MIMAT0005835	mmu-miR-1b-5p	Lrrc8c	100604	ENSMUSG00000054720	-1.2428
miranda	MIMAT0005835	mmu-miR-1b-5p	Atp11c	320940	ENSMUSG00000062949	-1.2424
miranda	MIMAT0005835	mmu-miR-1b-5p	Ttc8	76260	ENSMUSG00000021013	-1.2413
miranda	MIMAT0005835	mmu-miR-1b-5p	5430427O19Rik	71398	ENSMUSG00000025058	-1.2399
miranda	MIMAT0005835	mmu-miR-1b-5p	Eed	13626	ENSMUSG00000030619	-1.2392
miranda	MIMAT0005835	mmu-miR-1b-5p	Nrbf2	641340	ENSMUSG00000075000	-1.239
miranda	MIMAT0005835	mmu-miR-1b-5p	Ezh2	14056	ENSMUSG00000029687	-1.2378
miranda	MIMAT0005835	mmu-miR-1b-5p	Atf1	11908	ENSMUSG00000023027	-1.2375
miranda	MIMAT0005835	mmu-miR-1b-5p	Orc1	18392	ENSMUSG00000028587	-1.2373
miranda	MIMAT0005835	mmu-miR-1b-5p	Cwc22	80744	ENSMUSG00000027014	-1.237
miranda	MIMAT0005835	mmu-miR-1b-5p	Brca1	12189	ENSMUSG00000017146	-1.2359
miranda	MIMAT0005835	mmu-miR-1b-5p	Cdt1	67177	ENSMUSG00000006585	-1.2355
miranda	MIMAT0005835	mmu-miR-1b-5p	Epc2	227867	ENSMUSG00000069495	-1.2341
miranda	MIMAT0005835	mmu-miR-1b-5p	Slmap	83997	ENSMUSG00000021870	-1.2337
miranda	MIMAT0005835	mmu-miR-1b-5p	Hs3st5	319415	ENSMUSG00000044499	-1.2331
miranda	MIMAT0005835	mmu-miR-1b-5p	Pdgfd	71785	ENSMUSG00000032006	-1.2329
miranda	MIMAT0005835	mmu-miR-1b-5p	Abhd17b	226016	ENSMUSG00000047368	-1.2304
miranda	MIMAT0005835	mmu-miR-1b-5p	Pgam1	18648	ENSMUSG00000011752	-1.2299
miranda	MIMAT0005835	mmu-miR-1b-5p	Dmd	13405	ENSMUSG00000045103	-1.2294
miranda	MIMAT0005835	mmu-miR-1b-5p	Kcne4	57814	ENSMUSG00000047330	-1.229
miranda	MIMAT0005835	mmu-miR-1b-5p	Tra2b	20462	ENSMUSG00000022858	-1.228
miranda	MIMAT0005835	mmu-miR-1b-5p	Igf1	16000	ENSMUSG00000020053	-1.2275
miranda	MIMAT0005835	mmu-miR-1b-5p	Slmap	83997	ENSMUSG00000021870	-1.2247
miranda	MIMAT0005835	mmu-miR-1b-5p	Igf1	16000	ENSMUSG00000020053	-1.2247
miranda	MIMAT0005835	mmu-miR-1b-5p	Ccdc68	381175	ENSMUSG00000038903	-1.2246
miranda	MIMAT0005835	mmu-miR-1b-5p	Smarca5	93762	ENSMUSG00000031715	-1.2241
miranda	MIMAT0005835	mmu-miR-1b-5p	Mcm3	17215	ENSMUSG00000041859	-1.224
miranda	MIMAT0005835	mmu-miR-1b-5p	Hsd17b4	15488	ENSMUSG00000024507	-1.2229
miranda	MIMAT0005835	mmu-miR-1b-5p	Pgam5	72542	ENSMUSG00000029500	-1.2222
miranda	MIMAT0005835	mmu-miR-1b-5p	Hoxd1	15429	ENSMUSG00000042448	-1.2222
miranda	MIMAT0005835	mmu-miR-1b-5p	Cebpz	12607	ENSMUSG00000024081	-1.2209
miranda	MIMAT0005835	mmu-miR-1b-5p	Sox9	20682	ENSMUSG00000000567	-1.2199
miranda	MIMAT0005835	mmu-miR-1b-5p	Tdrkh	72634	ENSMUSG00000041912	-1.219
miranda	MIMAT0005835	mmu-miR-1b-5p	Gm13051	626316	ENSMUSG00000066009	-1.2179
miranda	MIMAT0005835	mmu-miR-1b-5p	Sult1d1	53315	ENSMUSG00000029273	-1.2176
miranda	MIMAT0005835	mmu-miR-1b-5p	Klhl13	67455	ENSMUSG00000036782	-1.2157
miranda	MIMAT0005835	mmu-miR-1b-5p	Arhgap44	216831	ENSMUSG00000033389	-1.2135
miranda	MIMAT0005835	mmu-miR-1b-5p	Trappc3l	692132	ENSMUSG00000071340	-1.2131
miranda	MIMAT0005835	mmu-miR-1b-5p	1700039M10Rik	67518		-1.2124
miranda	MIMAT0005835	mmu-miR-1b-5p	Kdelr2	66913	ENSMUSG00000079111	-1.2115
miranda	MIMAT0005835	mmu-miR-1b-5p	Itgax	16411	ENSMUSG00000030789	-1.2096
miranda	MIMAT0005835	mmu-miR-1b-5p	Nrxn1	18189	ENSMUSG00000024109	-1.2093
miranda	MIMAT0005835	mmu-miR-1b-5p	Sc5d	235293	ENSMUSG00000032018	-1.2082
miranda	MIMAT0005835	mmu-miR-1b-5p	Hmgcs1	208715	ENSMUSG00000093930	-1.2064
miranda	MIMAT0005835	mmu-miR-1b-5p	Pabpn1l	382035	ENSMUSG00000069867	-1.2063
miranda	MIMAT0005835	mmu-miR-1b-5p	Mib1	225164	ENSMUSG00000024294	-1.2061
miranda	MIMAT0005835	mmu-miR-1b-5p	Rab11a	53869	ENSMUSG00000004771	-1.2061
miranda	MIMAT0005835	mmu-miR-1b-5p	Synpr	72003	ENSMUSG00000056296	-1.2055
miranda	MIMAT0005835	mmu-miR-1b-5p	Sema3d	108151	ENSMUSG00000040254	-1.2042
miranda	MIMAT0005835	mmu-miR-1b-5p	Agtr1b	11608	ENSMUSG00000054988	-1.2039
miranda	MIMAT0005835	mmu-miR-1b-5p	Lin54	231506	ENSMUSG00000035310	-1.2032
miranda	MIMAT0005835	mmu-miR-1b-5p	Serpina7	331535	ENSMUSG00000031271	-1.2024
miranda	MIMAT0005835	mmu-miR-1b-5p	Foxd1	15229	ENSMUSG00000078302	-1.2023
miranda	MIMAT0005835	mmu-miR-1b-5p	Asap1	13196	ENSMUSG00000022377	-1.2018
miranda	MIMAT0005835	mmu-miR-1b-5p	Tnfrsf21	94185	ENSMUSG00000023915	-1.2011
miranda	MIMAT0005835	mmu-miR-1b-5p	Yipf4	67864	ENSMUSG00000024072	-1.2005
miranda	MIMAT0005835	mmu-miR-1b-5p	Gltscr1l	210982	ENSMUSG00000036568	-1.2001
miranda	MIMAT0005835	mmu-miR-1b-5p	A630023A22Rik	105518	ENSMUSG00000095493	-1.1996
miranda	MIMAT0005835	mmu-miR-1b-5p	Zhx1	22770	ENSMUSG00000022361	-1.1988
miranda	MIMAT0005835	mmu-miR-1b-5p	Dhrs7	66375	ENSMUSG00000021094	-1.1976
miranda	MIMAT0005835	mmu-miR-1b-5p	Psma2	19166	ENSMUSG00000015671	-1.197
miranda	MIMAT0005835	mmu-miR-1b-5p	Zfp91	109910	ENSMUSG00000024695	-1.1968
miranda	MIMAT0005835	mmu-miR-1b-5p	Hspa14	50497	ENSMUSG00000051396	-1.1967
miranda	MIMAT0005835	mmu-miR-1b-5p	Arhgap44	216831	ENSMUSG00000033389	-1.1962
miranda	MIMAT0005835	mmu-miR-1b-5p	Dennd4a	102442	ENSMUSG00000053641	-1.1954
miranda	MIMAT0005835	mmu-miR-1b-5p	Slc20a1	20515	ENSMUSG00000027397	-1.1951
miranda	MIMAT0005835	mmu-miR-1b-5p	Pck1	18534	ENSMUSG00000027513	-1.195
miranda	MIMAT0005835	mmu-miR-1b-5p	C2cd3	277939	ENSMUSG00000047248	-1.1939
miranda	MIMAT0005835	mmu-miR-1b-5p	Fnd3c2	331491	ENSMUSG00000073012	-1.1935
miranda	MIMAT0005835	mmu-miR-1b-5p	Tmem243	652925	ENSMUSG00000079659	-1.1923
miranda	MIMAT0005835	mmu-miR-1b-5p	Nprl2	56032	ENSMUSG00000010057	-1.1922
miranda	MIMAT0005835	mmu-miR-1b-5p	Ncor1	20185	ENSMUSG00000018501	-1.1915
miranda	MIMAT0005835	mmu-miR-1b-5p	Myef2	17876	ENSMUSG00000027201	-1.1915
miranda	MIMAT0005835	mmu-miR-1b-5p	Ispd	75847	ENSMUSG00000043153	-1.1909
miranda	MIMAT0005835	mmu-miR-1b-5p	Trpc6	22068	ENSMUSG00000031997	-1.1905
miranda	MIMAT0005835	mmu-miR-1b-5p	Cdc14a	229776	ENSMUSG00000033502	-1.1896
miranda	MIMAT0005835	mmu-miR-1b-5p	Ms4a4b	60361	ENSMUSG00000056290	-1.1868
miranda	MIMAT0005835	mmu-miR-1b-5p	Wdr35	74682	ENSMUSG00000066643	-1.1867
miranda	MIMAT0005835	mmu-miR-1b-5p	Cfh	12628	ENSMUSG00000026365	-1.1864
miranda	MIMAT0005835	mmu-miR-1b-5p	Tmem175	72392	ENSMUSG00000013495	-1.1853
miranda	MIMAT0005835	mmu-miR-1b-5p	Cxcl10	15945	ENSMUSG00000034855	-1.1843
miranda	MIMAT0005835	mmu-miR-1b-5p	Gyk	14933	ENSMUSG00000025059	-1.1812
miranda	MIMAT0005835	mmu-miR-1b-5p	Hsf2	15500	ENSMUSG00000019878	-1.1807
miranda	MIMAT0005835	mmu-miR-1b-5p	Nfx1	74164	ENSMUSG00000028423	-1.1803
miranda	MIMAT0005835	mmu-miR-1b-5p	Dleu7	239133	ENSMUSG00000048281	-1.1787
miranda	MIMAT0005835	mmu-miR-1b-5p	Lmo3	109593	ENSMUSG00000030226	-1.177
miranda	MIMAT0005835	mmu-miR-1b-5p	4921513D11Rik	70923		-1.177
miranda	MIMAT0005835	mmu-miR-1b-5p	Tle1	21885	ENSMUSG00000008305	-1.1758
miranda	MIMAT0005835	mmu-miR-1b-5p	Tle1	21885	ENSMUSG00000008305	-1.1757
miranda	MIMAT0005835	mmu-miR-1b-5p	Sclt1	67161	ENSMUSG00000059834	-1.1752
miranda	MIMAT0005835	mmu-miR-1b-5p	Zfand5	22682	ENSMUSG00000024750	-1.1752
miranda	MIMAT0005835	mmu-miR-1b-5p	Aurkc	20871	ENSMUSG00000070837	-1.1742
miranda	MIMAT0005835	mmu-miR-1b-5p	Zfp72	238722	ENSMUSG00000069184	-1.1741
miranda	MIMAT0005835	mmu-miR-1b-5p	Zfp410	52708	ENSMUSG00000042472	-1.1734
miranda	MIMAT0005835	mmu-miR-1b-5p	Wdr44	72404	ENSMUSG00000036769	-1.1734
miranda	MIMAT0005835	mmu-miR-1b-5p	Fem1c	240263	ENSMUSG00000033319	-1.1733
miranda	MIMAT0005835	mmu-miR-1b-5p	Nek10	238944		-1.173
miranda	MIMAT0005835	mmu-miR-1b-5p	Ddx6	13209	ENSMUSG00000032097	-1.1727
miranda	MIMAT0005835	mmu-miR-1b-5p	Cops2	12848	ENSMUSG00000027206	-1.1722
miranda	MIMAT0005835	mmu-miR-1b-5p	Ewsr1	14030	ENSMUSG00000009079	-1.1712
miranda	MIMAT0005835	mmu-miR-1b-5p	Rab1	19324	ENSMUSG00000020149	-1.171
miranda	MIMAT0005835	mmu-miR-1b-5p	Kdelc1	72050	ENSMUSG00000026047	-1.1707
miranda	MIMAT0005835	mmu-miR-1b-5p	Sncaip	67847	ENSMUSG00000024534	-1.1705
miranda	MIMAT0005835	mmu-miR-1b-5p	Skint10	230613	ENSMUSG00000048766	-1.169
miranda	MIMAT0005835	mmu-miR-1b-5p	Tfb2m	15278	ENSMUSG00000026492	-1.1689
miranda	MIMAT0005835	mmu-miR-1b-5p	Kat6b	54169	ENSMUSG00000021767	-1.1688
miranda	MIMAT0005835	mmu-miR-1b-5p	Mipol1	73490	ENSMUSG00000047022	-1.1684
miranda	MIMAT0005835	mmu-miR-1b-5p	Ikzf2	22779	ENSMUSG00000025997	-1.1669
miranda	MIMAT0005835	mmu-miR-1b-5p	Nfatc1	18018	ENSMUSG00000033016	-1.1668
miranda	MIMAT0005835	mmu-miR-1b-5p	L3hypdh	67217	ENSMUSG00000019718	-1.1666
miranda	MIMAT0005835	mmu-miR-1b-5p	Hmgcs1	208715	ENSMUSG00000093930	-1.1661
miranda	MIMAT0005835	mmu-miR-1b-5p	Casp6	12368	ENSMUSG00000027997	-1.1661
miranda	MIMAT0005835	mmu-miR-1b-5p	Pid1	98496	ENSMUSG00000045658	-1.1657
miranda	MIMAT0005835	mmu-miR-1b-5p	Mff	75734	ENSMUSG00000026150	-1.1651
miranda	MIMAT0005835	mmu-miR-1b-5p	Pard3b	72823	ENSMUSG00000052062	-1.1651
miranda	MIMAT0005835	mmu-miR-1b-5p	Eme1	268465	ENSMUSG00000039055	-1.1644
miranda	MIMAT0005835	mmu-miR-1b-5p	Eid2	386655	ENSMUSG00000046058	-1.164
miranda	MIMAT0005835	mmu-miR-1b-5p	Wrnip1	78903	ENSMUSG00000021400	-1.1631
miranda	MIMAT0005835	mmu-miR-1b-5p	Cyp2j9	74519	ENSMUSG00000015224	-1.1626
miranda	MIMAT0005835	mmu-miR-1b-5p	Odf2l	52184	ENSMUSG00000028256	-1.1612
miranda	MIMAT0005835	mmu-miR-1b-5p	Vmn1r4	171194	ENSMUSG00000071893	-1.16
miranda	MIMAT0005835	mmu-miR-1b-5p	2010106E10Rik	67715	ENSMUSG00000025528	-1.1595
miranda	MIMAT0005835	mmu-miR-1b-5p	Fbxo33	70611	ENSMUSG00000035329	-1.1594
miranda	MIMAT0005835	mmu-miR-1b-5p	Stag2	20843	ENSMUSG00000025862	-1.159
miranda	MIMAT0005835	mmu-miR-1b-5p	Rpgr	19893	ENSMUSG00000031174	-1.1576
miranda	MIMAT0005835	mmu-miR-1b-5p	Trim23	81003	ENSMUSG00000021712	-1.1538
miranda	MIMAT0005835	mmu-miR-1b-5p	Cnot6l	231464	ENSMUSG00000034724	-1.1535
miranda	MIMAT0005835	mmu-miR-1b-5p	Bmp2k	140780	ENSMUSG00000034663	-1.1526
miranda	MIMAT0005835	mmu-miR-1b-5p	Homer1	26556	ENSMUSG00000007617	-1.1524
miranda	MIMAT0005835	mmu-miR-1b-5p	LOC628147	628147		-1.152
miranda	MIMAT0005835	mmu-miR-1b-5p	LOC628147	628147		-1.1518
miranda	MIMAT0005835	mmu-miR-1b-5p	Rmdn2	381110	ENSMUSG00000036368	-1.1516
miranda	MIMAT0005835	mmu-miR-1b-5p	Kat6b	54169	ENSMUSG00000021767	-1.1504
miranda	MIMAT0005835	mmu-miR-1b-5p	Snai2	20583	ENSMUSG00000022676	-1.1493
miranda	MIMAT0005835	mmu-miR-1b-5p	Sh2d1a	20400	ENSMUSG00000005696	-1.1491
miranda	MIMAT0005835	mmu-miR-1b-5p	Stat5b	20851	ENSMUSG00000020919	-1.1489
miranda	MIMAT0005835	mmu-miR-1b-5p	Camk2d	108058	ENSMUSG00000053819	-1.1469
miranda	MIMAT0005835	mmu-miR-1b-5p	Sh2d1a	20400	ENSMUSG00000005696	-1.1465
miranda	MIMAT0005835	mmu-miR-1b-5p	Igf1	16000	ENSMUSG00000020053	-1.1465
miranda	MIMAT0005835	mmu-miR-1b-5p	Impg2	224224	ENSMUSG00000035270	-1.1464
miranda	MIMAT0005835	mmu-miR-1b-5p	Etl4	208618	ENSMUSG00000036617	-1.1464
miranda	MIMAT0005835	mmu-miR-1b-5p	Barx2	12023	ENSMUSG00000032033	-1.1449
miranda	MIMAT0005835	mmu-miR-1b-5p	Gm9	194854	ENSMUSG00000073243	-1.1446
miranda	MIMAT0005835	mmu-miR-1b-5p	F13a1	74145	ENSMUSG00000039109	-1.1442
miranda	MIMAT0005835	mmu-miR-1b-5p	Kdm5d	20592	ENSMUSG00000056673	-1.1429
miranda	MIMAT0005835	mmu-miR-1b-5p	Hnrnpf	98758	ENSMUSG00000042079	-1.1417
miranda	MIMAT0005835	mmu-miR-1b-5p	Plcd3	72469	ENSMUSG00000020937	-1.1413
miranda	MIMAT0005835	mmu-miR-1b-5p	Igf1	16000	ENSMUSG00000020053	-1.1401
miranda	MIMAT0005835	mmu-miR-1b-5p	Eya1	14048	ENSMUSG00000025932	-1.1393
miranda	MIMAT0005835	mmu-miR-1b-5p	Trmt10c	52575	ENSMUSG00000044763	-1.1393
miranda	MIMAT0005835	mmu-miR-1b-5p	Phf20l1	239510	ENSMUSG00000072501	-1.1392
miranda	MIMAT0005835	mmu-miR-1b-5p	Hipk1	15257	ENSMUSG00000008730	-1.1392
miranda	MIMAT0005835	mmu-miR-1b-5p	Birc6	12211	ENSMUSG00000024073	-1.1388
miranda	MIMAT0005835	mmu-miR-1b-5p	Rbm43	71684	ENSMUSG00000036249	-1.1386
miranda	MIMAT0005835	mmu-miR-1b-5p	A330050B17Rik	654424		-1.1381
miranda	MIMAT0005835	mmu-miR-1b-5p	Fam196b	574403	ENSMUSG00000069911	-1.138
miranda	MIMAT0005835	mmu-miR-1b-5p	2500002B13Rik	78353		-1.138
miranda	MIMAT0005835	mmu-miR-1b-5p	Reln	19699	ENSMUSG00000042453	-1.1376
miranda	MIMAT0005835	mmu-miR-1b-5p	D10Wsu102e	28109	ENSMUSG00000020255	-1.1363
miranda	MIMAT0005835	mmu-miR-1b-5p	Shprh	268281	ENSMUSG00000090112	-1.1362
miranda	MIMAT0005835	mmu-miR-1b-5p	Wasl	73178	ENSMUSG00000029684	-1.1356
miranda	MIMAT0005835	mmu-miR-1b-5p	LOC331528	331528		-1.1352
miranda	MIMAT0005835	mmu-miR-1b-5p	Wdr78	242584	ENSMUSG00000035126	-1.1344
miranda	MIMAT0005835	mmu-miR-1b-5p	Ptgs2	19225	ENSMUSG00000032487	-1.1341
miranda	MIMAT0005835	mmu-miR-1b-5p	2610100L16Rik	70441		-1.1329
miranda	MIMAT0005835	mmu-miR-1b-5p	Ubtd2	327900	ENSMUSG00000044949	-1.1312
miranda	MIMAT0005835	mmu-miR-1b-5p	Lrrc40	67144	ENSMUSG00000063052	-1.1308
miranda	MIMAT0005835	mmu-miR-1b-5p	Zbtb18	30928	ENSMUSG00000063659	-1.1306
miranda	MIMAT0005835	mmu-miR-1b-5p	Wt1	22431	ENSMUSG00000016458	-1.1301
miranda	MIMAT0005835	mmu-miR-1b-5p	Reln	19699	ENSMUSG00000042453	-1.13
miranda	MIMAT0005835	mmu-miR-1b-5p	Lrba	80877	ENSMUSG00000028080	-1.1296
miranda	MIMAT0005835	mmu-miR-1b-5p	Cnot6l	231464	ENSMUSG00000034724	-1.1293
miranda	MIMAT0005835	mmu-miR-1b-5p	Ror2	26564	ENSMUSG00000021464	-1.1292
miranda	MIMAT0005835	mmu-miR-1b-5p	A330050B17Rik	654424		-1.1284
miranda	MIMAT0005835	mmu-miR-1b-5p	Serbp1	66870	ENSMUSG00000036371	-1.1282
miranda	MIMAT0005835	mmu-miR-1b-5p	Zfp952	240067	ENSMUSG00000053390	-1.1258
miranda	MIMAT0005835	mmu-miR-1b-5p	Plscr2	18828	ENSMUSG00000032372	-1.1256
miranda	MIMAT0005835	mmu-miR-1b-5p	9430038I01Rik	77252	ENSMUSG00000040139	-1.1255
miranda	MIMAT0005835	mmu-miR-1b-5p	Crem	12916	ENSMUSG00000063889	-1.1255
miranda	MIMAT0005835	mmu-miR-1b-5p	Ms4a4b	60361	ENSMUSG00000056290	-1.125
miranda	MIMAT0005835	mmu-miR-1b-5p	Lrch2	210297	ENSMUSG00000031290	-1.1234
miranda	MIMAT0005835	mmu-miR-1b-5p	Zfp664	269704	ENSMUSG00000079215	-1.1225
miranda	MIMAT0005835	mmu-miR-1b-5p	LOC627891	627891		-1.1218
miranda	MIMAT0005835	mmu-miR-1b-5p	Traf5	22033		-1.1203
miranda	MIMAT0005835	mmu-miR-1b-5p	Pfdn1	67199	ENSMUSG00000024346	-1.1197
miranda	MIMAT0005835	mmu-miR-1b-5p	Ccl1	20290	ENSMUSG00000020702	-1.1197
miranda	MIMAT0005835	mmu-miR-1b-5p	Rnf44	105239	ENSMUSG00000034928	-1.1196
miranda	MIMAT0005835	mmu-miR-1b-5p	Abca16	233810	ENSMUSG00000051900	-1.1194
miranda	MIMAT0005835	mmu-miR-1b-5p	Krit1	79264	ENSMUSG00000000600	-1.119
miranda	MIMAT0005835	mmu-miR-1b-5p	Bcas3	192197	ENSMUSG00000059439	-1.1188
miranda	MIMAT0005835	mmu-miR-1b-5p	Fam78b	226610	ENSMUSG00000060568	-1.1182
miranda	MIMAT0005835	mmu-miR-1b-5p	Cerkl	228094	ENSMUSG00000075256	-1.1178
miranda	MIMAT0005835	mmu-miR-1b-5p	Wnt3a	22416	ENSMUSG00000009900	-1.1161
miranda	MIMAT0005835	mmu-miR-1b-5p	2500002B13Rik	78353		-1.1154
miranda	MIMAT0005835	mmu-miR-1b-5p	Ptbp2	56195	ENSMUSG00000028134	-1.115
miranda	MIMAT0005835	mmu-miR-1b-5p	Utp6	216987	ENSMUSG00000035575	-1.1147
miranda	MIMAT0005835	mmu-miR-1b-5p	Nek10	238944		-1.1146
miranda	MIMAT0005835	mmu-miR-1b-5p	Adal	75894	ENSMUSG00000027259	-1.1142
miranda	MIMAT0005835	mmu-miR-1b-5p	Ints2	70422	ENSMUSG00000018068	-1.1119
miranda	MIMAT0005835	mmu-miR-1b-5p	4933425L06Rik	66763	ENSMUSG00000021718	-1.1119
miranda	MIMAT0005835	mmu-miR-1b-5p	4921513I03Rik	70874		-1.1117
miranda	MIMAT0005835	mmu-miR-1b-5p	Rgmb	68799	ENSMUSG00000048027	-1.1102
miranda	MIMAT0005835	mmu-miR-1b-5p	Fam26e	103511	ENSMUSG00000049872	-1.1091
miranda	MIMAT0005835	mmu-miR-1b-5p	Slc25a25	227731	ENSMUSG00000026819	-1.109
miranda	MIMAT0005835	mmu-miR-1b-5p	Mbnl1	56758	ENSMUSG00000027763	-1.1087
miranda	MIMAT0005835	mmu-miR-1b-5p	Hif1a	15251	ENSMUSG00000021109	-1.1085
miranda	MIMAT0005835	mmu-miR-1b-5p	Piwil2	57746	ENSMUSG00000033644	-1.1083
miranda	MIMAT0005835	mmu-miR-1b-5p	Zranb2	53861	ENSMUSG00000028180	-1.108
miranda	MIMAT0005835	mmu-miR-1b-5p	Tnpo1	238799	ENSMUSG00000009470	-1.1073
miranda	MIMAT0005835	mmu-miR-1b-5p	Slitrk6	239250	ENSMUSG00000045871	-1.1066
miranda	MIMAT0005835	mmu-miR-1b-5p	Fpgt	75540	ENSMUSG00000053870	-1.1064
miranda	MIMAT0005835	mmu-miR-1b-5p	Mbnl1	56758	ENSMUSG00000027763	-1.1053
miranda	MIMAT0005835	mmu-miR-1b-5p	Uhmk1	16589	ENSMUSG00000026667	-1.1052
miranda	MIMAT0005835	mmu-miR-1b-5p	Spice1	212514	ENSMUSG00000043065	-1.1043
miranda	MIMAT0005835	mmu-miR-1b-5p	Sphkap	77629	ENSMUSG00000026163	-1.1043
miranda	MIMAT0005835	mmu-miR-1b-5p	Rhd	19746	ENSMUSG00000028825	-1.104
miranda	MIMAT0005835	mmu-miR-1b-5p	Rpgr	19893	ENSMUSG00000031174	-1.1036
miranda	MIMAT0005835	mmu-miR-1b-5p	Ppp1cb	19046	ENSMUSG00000014956	-1.1031
miranda	MIMAT0005835	mmu-miR-1b-5p	Pdgfa	18590	ENSMUSG00000025856	-1.1023
miranda	MIMAT0005835	mmu-miR-1b-5p	Ddx26b	236790	ENSMUSG00000035967	-1.1018
miranda	MIMAT0005835	mmu-miR-1b-5p	Chrdl1	83453	ENSMUSG00000031283	-1.1017
miranda	MIMAT0005835	mmu-miR-1b-5p	Gtf2a1l	71828	ENSMUSG00000024154	-1.0993
miranda	MIMAT0005835	mmu-miR-1b-5p	L3hypdh	67217	ENSMUSG00000019718	-1.0992
miranda	MIMAT0005835	mmu-miR-1b-5p	Pdgfa	18590	ENSMUSG00000025856	-1.099
miranda	MIMAT0005835	mmu-miR-1b-5p	Hepacam2	101202	ENSMUSG00000044156	-1.0987
miranda	MIMAT0005835	mmu-miR-1b-5p	Fer	14158	ENSMUSG00000000127	-1.0986
miranda	MIMAT0005835	mmu-miR-1b-5p	Arg1	11846	ENSMUSG00000019987	-1.0985
miranda	MIMAT0005835	mmu-miR-1b-5p	Prrc2c	226562	ENSMUSG00000040225	-1.0984
miranda	MIMAT0005835	mmu-miR-1b-5p	Zfp28	22690	ENSMUSG00000062861	-1.0958
miranda	MIMAT0005835	mmu-miR-1b-5p	Emc7	73024	ENSMUSG00000055943	-1.0952
miranda	MIMAT0005835	mmu-miR-1b-5p	3110001I22Rik	66598	ENSMUSG00000079737	-1.0947
miranda	MIMAT0005835	mmu-miR-1b-5p	Themis	210757	ENSMUSG00000049109	-1.094
miranda	MIMAT0005835	mmu-miR-1b-5p	Slc25a21	217593	ENSMUSG00000035472	-1.0932
miranda	MIMAT0005835	mmu-miR-1b-5p	Tmigd1	66601	ENSMUSG00000020839	-1.0926
miranda	MIMAT0005835	mmu-miR-1b-5p	Mafg	17134	ENSMUSG00000051510	-1.0923
miranda	MIMAT0005835	mmu-miR-1b-5p	Nr1h4	20186	ENSMUSG00000047638	-1.0922
miranda	MIMAT0005835	mmu-miR-1b-5p	Ctdspl2	329506	ENSMUSG00000033411	-1.0918
miranda	MIMAT0005835	mmu-miR-1b-5p	Syncrip	56403	ENSMUSG00000032423	-1.0911
miranda	MIMAT0005835	mmu-miR-1b-5p	Vgll3	73569	ENSMUSG00000091243	-1.09
miranda	MIMAT0005835	mmu-miR-1b-5p	Col11a1	12814	ENSMUSG00000027966	-1.0884
miranda	MIMAT0005835	mmu-miR-1b-5p	Phf20	228829	ENSMUSG00000038116	-1.0883
miranda	MIMAT0005835	mmu-miR-1b-5p	Kif16b	16558	ENSMUSG00000038844	-1.088
miranda	MIMAT0005835	mmu-miR-1b-5p	Riok3	66878	ENSMUSG00000024404	-1.0875
miranda	MIMAT0005835	mmu-miR-1b-5p	Eif4e	13684	ENSMUSG00000028156	-1.0875
miranda	MIMAT0005835	mmu-miR-1b-5p	Gosr1	53334	ENSMUSG00000010392	-1.087
miranda	MIMAT0005835	mmu-miR-1b-5p	Soat1	20652	ENSMUSG00000026600	-1.0866
miranda	MIMAT0005835	mmu-miR-1b-5p	4930422G04Rik	71643	ENSMUSG00000051278	-1.086
miranda	MIMAT0005835	mmu-miR-1b-5p	Capza2	12343	ENSMUSG00000015733	-1.0849
miranda	MIMAT0005835	mmu-miR-1b-5p	Epha5	13839	ENSMUSG00000029245	-1.0827
miranda	MIMAT0005835	mmu-miR-1b-5p	Smdt1	69029	ENSMUSG00000022452	-1.0813
miranda	MIMAT0005835	mmu-miR-1b-5p	Gnai1	14677	ENSMUSG00000057614	-1.0805
miranda	MIMAT0005835	mmu-miR-1b-5p	Pinlyp	641361	ENSMUSG00000011632	-1.0802
miranda	MIMAT0005835	mmu-miR-1b-5p	Serpine3	319433	ENSMUSG00000091155	-1.0787
miranda	MIMAT0005835	mmu-miR-1b-5p	Dhx40	67487	ENSMUSG00000018425	-1.0787
miranda	MIMAT0005835	mmu-miR-1b-5p	Pkp4	227937	ENSMUSG00000026991	-1.0786
miranda	MIMAT0005835	mmu-miR-1b-5p	Ctgf	14219	ENSMUSG00000019997	-1.0783
miranda	MIMAT0005835	mmu-miR-1b-5p	Pdlim1	54132	ENSMUSG00000055044	-1.0783
miranda	MIMAT0005835	mmu-miR-1b-5p	Zfand5	22682	ENSMUSG00000024750	-1.078
miranda	MIMAT0005835	mmu-miR-1b-5p	Hsdl2	72479	ENSMUSG00000028383	-1.0774
miranda	MIMAT0005835	mmu-miR-1b-5p	Arhgap6	11856	ENSMUSG00000031355	-1.0759
miranda	MIMAT0005835	mmu-miR-1b-5p	Fbxo33	70611	ENSMUSG00000035329	-1.0759
miranda	MIMAT0005835	mmu-miR-1b-5p	Olfr1426	258805	ENSMUSG00000044994	-1.0747
miranda	MIMAT0005835	mmu-miR-1b-5p	Ocln	18260	ENSMUSG00000021638	-1.074
miranda	MIMAT0005835	mmu-miR-1b-5p	Ptbp2	56195	ENSMUSG00000028134	-1.0739
miranda	MIMAT0005835	mmu-miR-1b-5p	Slco1a4	28250	ENSMUSG00000030237	-1.0738
miranda	MIMAT0005835	mmu-miR-1b-5p	Comtd1	69156	ENSMUSG00000021773	-1.0736
miranda	MIMAT0005835	mmu-miR-1b-5p	Synj2bp	24071	ENSMUSG00000090935	-1.0736
miranda	MIMAT0005835	mmu-miR-1b-5p	Nsg1	18196	ENSMUSG00000029126	-1.0733
miranda	MIMAT0005835	mmu-miR-1b-5p	Rnpc3	67225	ENSMUSG00000027981	-1.0731
miranda	MIMAT0005835	mmu-miR-1b-5p	Ctnnd2	18163	ENSMUSG00000022240	-1.073
miranda	MIMAT0005835	mmu-miR-1b-5p	Fcgr2b	14130	ENSMUSG00000026656	-1.0723
miranda	MIMAT0005835	mmu-miR-1b-5p	Prrc2c	226562	ENSMUSG00000040225	-1.0716
miranda	MIMAT0005835	mmu-miR-1b-5p	Kbtbd7	211255	ENSMUSG00000043881	-1.0713
miranda	MIMAT0005835	mmu-miR-1b-5p	Dhx15	13204	ENSMUSG00000029169	-1.071
miranda	MIMAT0005835	mmu-miR-1b-5p	Pls3	102866	ENSMUSG00000016382	-1.0693
miranda	MIMAT0005835	mmu-miR-1b-5p	Arhgap15	76117	ENSMUSG00000049744	-1.0693
miranda	MIMAT0005835	mmu-miR-1b-5p	LOC545086	545086		-1.0687
miranda	MIMAT0005835	mmu-miR-1b-5p	Mib1	225164	ENSMUSG00000024294	-1.0686
miranda	MIMAT0005835	mmu-miR-1b-5p	Nr1h5	381463	ENSMUSG00000048938	-1.0681
miranda	MIMAT0005835	mmu-miR-1b-5p	Prrc2c	226562	ENSMUSG00000040225	-1.0681
miranda	MIMAT0005835	mmu-miR-1b-5p	Ccdc47	67163	ENSMUSG00000078622	-1.0678
miranda	MIMAT0005835	mmu-miR-1b-5p	Dcp1b	319618	ENSMUSG00000041477	-1.0676
miranda	MIMAT0005835	mmu-miR-1b-5p	Ptprz1	19283	ENSMUSG00000068748	-1.0671
miranda	MIMAT0005835	mmu-miR-1b-5p	Zfp459	328274	ENSMUSG00000055560	-1.0668
miranda	MIMAT0005835	mmu-miR-1b-5p	Krit1	79264	ENSMUSG00000000600	-1.0667
miranda	MIMAT0005835	mmu-miR-1b-5p	4930583K01Rik	67745		-1.0664
miranda	MIMAT0005835	mmu-miR-1b-5p	Nr2c2	22026	ENSMUSG00000005893	-1.0662
miranda	MIMAT0005835	mmu-miR-1b-5p	Crem	12916	ENSMUSG00000063889	-1.0654
miranda	MIMAT0005835	mmu-miR-1b-5p	Wdr35	74682	ENSMUSG00000066643	-1.0616
miranda	MIMAT0005835	mmu-miR-1b-5p	5830403M04Rik	76003		-1.0614
miranda	MIMAT0005835	mmu-miR-1b-5p	Gabrg2	14406	ENSMUSG00000020436	-1.0612
miranda	MIMAT0005835	mmu-miR-1b-5p	Gm14419	627901	ENSMUSG00000078875	-1.0595
miranda	MIMAT0005835	mmu-miR-1b-5p	Gm2004	627901	ENSMUSG00000095648	-1.0595
miranda	MIMAT0005835	mmu-miR-1b-5p	Gm2004	627901	ENSMUSG00000095648	-1.0591
miranda	MIMAT0005835	mmu-miR-1b-5p	Gm14419	627901	ENSMUSG00000078875	-1.0591
miranda	MIMAT0005835	mmu-miR-1b-5p	Rab11a	53869	ENSMUSG00000004771	-1.0577
miranda	MIMAT0005835	mmu-miR-1b-5p	Polr2m	28015	ENSMUSG00000032199	-1.0572
miranda	MIMAT0005835	mmu-miR-1b-5p	Scaf11	72193	ENSMUSG00000033228	-1.0571
miranda	MIMAT0005835	mmu-miR-1b-5p	C330027C09Rik	224171	ENSMUSG00000033031	-1.0566
miranda	MIMAT0005835	mmu-miR-1b-5p	Gm5627	434510		-1.0532
miranda	MIMAT0005835	mmu-miR-1b-5p	Serpinb9d	20726	ENSMUSG00000054266	-1.0521
miranda	MIMAT0005835	mmu-miR-1b-5p	Gas2	14453	ENSMUSG00000030498	-1.0506
miranda	MIMAT0005835	mmu-miR-1b-5p	Fuca2	66848	ENSMUSG00000019810	-1.0492
miranda	MIMAT0005835	mmu-miR-1b-5p	Lage3	66192	ENSMUSG00000015289	-1.0489
miranda	MIMAT0005835	mmu-miR-1b-5p	Zmym6	100177	ENSMUSG00000042408	-1.0476
miranda	MIMAT0005835	mmu-miR-1b-5p	Mettl5	75422	ENSMUSG00000051730	-1.044
miranda	MIMAT0005835	mmu-miR-1b-5p	Plekha4	69217	ENSMUSG00000040428	-1.044
miranda	MIMAT0005835	mmu-miR-1b-5p	Dnajb9	27362	ENSMUSG00000014905	-1.0435
miranda	MIMAT0005835	mmu-miR-1b-5p	Dars2	226539	ENSMUSG00000026709	-1.0434
miranda	MIMAT0005835	mmu-miR-1b-5p	A230004M16Rik	320922		-1.0428
miranda	MIMAT0005835	mmu-miR-1b-5p	C86695	97476	ENSMUSG00000079112	-1.0414
miranda	MIMAT0005835	mmu-miR-1b-5p	Dcaf12l2	245403	ENSMUSG00000050926	-1.0412
miranda	MIMAT0005835	mmu-miR-1b-5p	Hcfc1	15161	ENSMUSG00000031386	-1.0397
miranda	MIMAT0005835	mmu-miR-1b-5p	Far1	67420	ENSMUSG00000030759	-1.0395
miranda	MIMAT0005835	mmu-miR-1b-5p	Nova1	664883	ENSMUSG00000021047	-1.0393
miranda	MIMAT0005835	mmu-miR-1b-5p	Kcnj1	56379	ENSMUSG00000041248	-1.0373
miranda	MIMAT0005835	mmu-miR-1b-5p	Ankrd46	68839	ENSMUSG00000048307	-1.0369
miranda	MIMAT0005835	mmu-miR-1b-5p	Kat2b	18519	ENSMUSG00000000708	-1.0356
miranda	MIMAT0005835	mmu-miR-1b-5p	Gnl3l	237107	ENSMUSG00000025266	-1.0348
miranda	MIMAT0005835	mmu-miR-1b-5p	Arl6ip6	65103	ENSMUSG00000026960	-1.0343
miranda	MIMAT0005835	mmu-miR-1b-5p	Slc25a32	69906	ENSMUSG00000022299	-1.0325
miranda	MIMAT0005835	mmu-miR-1b-5p	Lonrf1	244421	ENSMUSG00000039633	-1.0325
miranda	MIMAT0005835	mmu-miR-1b-5p	Samd7	75953	ENSMUSG00000051860	-1.0324
miranda	MIMAT0005835	mmu-miR-1b-5p	Acap2	78618	ENSMUSG00000049076	-1.0323
miranda	MIMAT0005835	mmu-miR-1b-5p	Lysmd3	80289	ENSMUSG00000035840	-1.0305
miranda	MIMAT0005835	mmu-miR-1b-5p	Trpm3	226025	ENSMUSG00000052387	-1.0303
miranda	MIMAT0005835	mmu-miR-1b-5p	Btbd10	68815	ENSMUSG00000038187	-1.03
miranda	MIMAT0005835	mmu-miR-1b-5p	Usp25	30940	ENSMUSG00000022867	-1.0293
miranda	MIMAT0005835	mmu-miR-1b-5p	Ift80	68259	ENSMUSG00000027778	-1.0291
miranda	MIMAT0005835	mmu-miR-1b-5p	Btnl9	237754	ENSMUSG00000040283	-1.0288
miranda	MIMAT0005835	mmu-miR-1b-5p	Sowaha	237761	ENSMUSG00000044352	-1.028
miranda	MIMAT0005835	mmu-miR-1b-5p	Tbc1d7	67046	ENSMUSG00000021368	-1.0274
miranda	MIMAT0005835	mmu-miR-1b-5p	Brd2	14312	ENSMUSG00000024335	-1.0262
miranda	MIMAT0005835	mmu-miR-1b-5p	Hnrnph3	432467	ENSMUSG00000020069	-1.0239
miranda	MIMAT0005835	mmu-miR-1b-5p	Ikzf2	22779	ENSMUSG00000025997	-1.0228
miranda	MIMAT0005835	mmu-miR-1b-5p	Dcn	13179	ENSMUSG00000019929	-1.0221
miranda	MIMAT0005835	mmu-miR-1b-5p	Prkca	18750	ENSMUSG00000050965	-1.022
miranda	MIMAT0005835	mmu-miR-1b-5p	Dazl	13164	ENSMUSG00000010592	-1.0216
miranda	MIMAT0005835	mmu-miR-1b-5p	Ddx60	234311	ENSMUSG00000037921	-1.0204
miranda	MIMAT0005835	mmu-miR-1b-5p	Kdm2a	225876	ENSMUSG00000054611	-1.0198
miranda	MIMAT0005835	mmu-miR-1b-5p	Hlf	217082	ENSMUSG00000003949	-1.0189
miranda	MIMAT0005835	mmu-miR-1b-5p	Fgf7	14178	ENSMUSG00000027208	-1.0184
miranda	MIMAT0005835	mmu-miR-1b-5p	Zfpm2	22762	ENSMUSG00000022306	-1.0177
miranda	MIMAT0005835	mmu-miR-1b-5p	Gpr87	84111	ENSMUSG00000051431	-1.0176
miranda	MIMAT0005835	mmu-miR-1b-5p	Rufy3	52822	ENSMUSG00000029291	-1.0172
miranda	MIMAT0005835	mmu-miR-1b-5p	Kansl1	76719	ENSMUSG00000018412	-1.0167
miranda	MIMAT0005835	mmu-miR-1b-5p	Nkap	67050	ENSMUSG00000016409	-1.0159
miranda	MIMAT0005835	mmu-miR-1b-5p	Zbtb18	30928	ENSMUSG00000063659	-1.0155
miranda	MIMAT0005835	mmu-miR-1b-5p	Pah	18478	ENSMUSG00000020051	-1.015
miranda	MIMAT0005835	mmu-miR-1b-5p	Rassf8	71323	ENSMUSG00000030259	-1.0142
miranda	MIMAT0005835	mmu-miR-1b-5p	Ran	19384	ENSMUSG00000029430	-1.0133
miranda	MIMAT0005835	mmu-miR-1b-5p	Cldn11	18417	ENSMUSG00000037625	-1.013
miranda	MIMAT0005835	mmu-miR-1b-5p	Eif2a	229317	ENSMUSG00000027810	-1.0127
miranda	MIMAT0005835	mmu-miR-1b-5p	Fip1l1	66899	ENSMUSG00000029227	-1.0126
miranda	MIMAT0005835	mmu-miR-1b-5p	Mctp1	78771	ENSMUSG00000021596	-1.0123
miranda	MIMAT0005835	mmu-miR-1b-5p	Kctd21	622320	ENSMUSG00000044952	-1.0115
miranda	MIMAT0005835	mmu-miR-1b-5p	Tpbpa	21984	ENSMUSG00000033834	-1.0115
miranda	MIMAT0005835	mmu-miR-1b-5p	Slc41a2	338365	ENSMUSG00000034591	-1.0109
miranda	MIMAT0005835	mmu-miR-1b-5p	Sfpq	71514	ENSMUSG00000028820	-1.0097
miranda	MIMAT0005835	mmu-miR-1b-5p	Zfpm2	22762	ENSMUSG00000022306	-1.0097
miranda	MIMAT0005835	mmu-miR-1b-5p	Stxbp5l	207227	ENSMUSG00000022829	-1.0084
miranda	MIMAT0005835	mmu-miR-1b-5p	Ctso	229445	ENSMUSG00000028015	-1.0073
miranda	MIMAT0005835	mmu-miR-1b-5p	Fam13b	225358	ENSMUSG00000036501	-1.007
miranda	MIMAT0005835	mmu-miR-1b-5p	Tmem116	77462	ENSMUSG00000029452	-1.0068
miranda	MIMAT0005835	mmu-miR-1b-5p	Picalm	233489	ENSMUSG00000039361	-1.006
miranda	MIMAT0005835	mmu-miR-1b-5p	Pds5b	100710	ENSMUSG00000034021	-1.0057
miranda	MIMAT0005835	mmu-miR-1b-5p	AI593442	330941	ENSMUSG00000078307	-1.0056
miranda	MIMAT0005835	mmu-miR-1b-5p	Prpf39	328110	ENSMUSG00000035597	-1.0054
miranda	MIMAT0005835	mmu-miR-1b-5p	Igf1	16000	ENSMUSG00000020053	-1.0047
miranda	MIMAT0005835	mmu-miR-1b-5p	Ltf	17002	ENSMUSG00000032496	-1.0045
miranda	MIMAT0005835	mmu-miR-1b-5p	Kcns2	16539	ENSMUSG00000050963	-1.0041
miranda	MIMAT0005835	mmu-miR-1b-5p	Ndufs5	595136	ENSMUSG00000028648	-1.004
miranda	MIMAT0005835	mmu-miR-1b-5p	Dmd	13405	ENSMUSG00000045103	-1.0032
miranda	MIMAT0005835	mmu-miR-1b-5p	Mmrn1	70945	ENSMUSG00000054641	-1.001
miranda	MIMAT0005835	mmu-miR-1b-5p	Znrf3	407821	ENSMUSG00000041961	-1.001
miranda	MIMAT0005835	mmu-miR-1b-5p	Sh3bp5l	79566	ENSMUSG00000013646	-0.9994
miranda	MIMAT0005835	mmu-miR-1b-5p	Atp11b	76295	ENSMUSG00000037400	-0.9994
miranda	MIMAT0005835	mmu-miR-1b-5p	Fgd4	224014	ENSMUSG00000022788	-0.9993
miranda	MIMAT0005835	mmu-miR-1b-5p	Slc22a8	19879	ENSMUSG00000063796	-0.9981
miranda	MIMAT0005835	mmu-miR-1b-5p	Map10	74393	ENSMUSG00000050930	-0.998
miranda	MIMAT0005835	mmu-miR-1b-5p	Kctd9	105440	ENSMUSG00000034327	-0.9974
miranda	MIMAT0005835	mmu-miR-1b-5p	Naaladl2	635702		-0.9965
miranda	MIMAT0005835	mmu-miR-1b-5p	Apbb1ip	54519	ENSMUSG00000026786	-0.9956
miranda	MIMAT0005835	mmu-miR-1b-5p	Igf1	16000	ENSMUSG00000020053	-0.9955
miranda	MIMAT0005835	mmu-miR-1b-5p	Ddx58	230073	ENSMUSG00000040296	-0.9951
miranda	MIMAT0005835	mmu-miR-1b-5p	Rtdr1	71236	ENSMUSG00000009070	-0.9947
miranda	MIMAT0005835	mmu-miR-1b-5p	Stam	20844	ENSMUSG00000026718	-0.9932
miranda	MIMAT0005835	mmu-miR-1b-5p	Lysmd3	80289	ENSMUSG00000035840	-0.9932
miranda	MIMAT0005835	mmu-miR-1b-5p	Gm14327	665205		-0.9925
miranda	MIMAT0005835	mmu-miR-1b-5p	Ska2	66140	ENSMUSG00000020492	-0.9925
miranda	MIMAT0005835	mmu-miR-1b-5p	Prpf18	67229	ENSMUSG00000039449	-0.9923
miranda	MIMAT0005835	mmu-miR-1b-5p	Zfp735	76390	ENSMUSG00000060630	-0.992
miranda	MIMAT0005835	mmu-miR-1b-5p	LOC432488	432488		-0.9912
miranda	MIMAT0005835	mmu-miR-1b-5p	Pds5b	100710	ENSMUSG00000034021	-0.9908
miranda	MIMAT0005835	mmu-miR-1b-5p	Mmp1b	83996	ENSMUSG00000041620	-0.9904
miranda	MIMAT0005835	mmu-miR-1b-5p	Arl14ep	212772	ENSMUSG00000027122	-0.99
miranda	MIMAT0005835	mmu-miR-1b-5p	Nek7	59125	ENSMUSG00000026393	-0.99
miranda	MIMAT0005835	mmu-miR-1b-5p	Spink2	69982	ENSMUSG00000053030	-0.9896
miranda	MIMAT0005835	mmu-miR-1b-5p	Hbb-bh1	15132	ENSMUSG00000052217	-0.9894
miranda	MIMAT0005835	mmu-miR-1b-5p	Arpc1a	56443	ENSMUSG00000029621	-0.9894
miranda	MIMAT0005835	mmu-miR-1b-5p	Lrrc9	78257	ENSMUSG00000021090	-0.9888
miranda	MIMAT0005835	mmu-miR-1b-5p	Cblb	208650	ENSMUSG00000022637	-0.9887
miranda	MIMAT0005835	mmu-miR-1b-5p	Akr1c14	105387	ENSMUSG00000033715	-0.9883
miranda	MIMAT0005835	mmu-miR-1b-5p	Rmdn1	66302	ENSMUSG00000028229	-0.9877
miranda	MIMAT0005835	mmu-miR-1b-5p	A030009H04Rik	80515		-0.9872
miranda	MIMAT0005835	mmu-miR-1b-5p	Orc4	26428	ENSMUSG00000026761	-0.9827
miranda	MIMAT0005835	mmu-miR-1b-5p	Il1rap	16180	ENSMUSG00000022514	-0.982
miranda	MIMAT0005835	mmu-miR-1b-5p	Olfr629	258818	ENSMUSG00000047545	-0.9819
miranda	MIMAT0005835	mmu-miR-1b-5p	Abcd2	26874	ENSMUSG00000055782	-0.9804
miranda	MIMAT0005835	mmu-miR-1b-5p	Nhsl2	100042480	ENSMUSG00000079481	-0.9803
miranda	MIMAT0005835	mmu-miR-1b-5p	Cwc22	80744	ENSMUSG00000027014	-0.9802
miranda	MIMAT0005835	mmu-miR-1b-5p	Lrriq3	74435	ENSMUSG00000028182	-0.9801
miranda	MIMAT0005835	mmu-miR-1b-5p	Usp42	76800	ENSMUSG00000051306	-0.9797
miranda	MIMAT0005835	mmu-miR-1b-5p	Fam78b	226610	ENSMUSG00000060568	-0.9796
miranda	MIMAT0005835	mmu-miR-1b-5p	A330069E16Rik	606735		-0.979
miranda	MIMAT0005835	mmu-miR-1b-5p	Ints6	18130	ENSMUSG00000035161	-0.9789
miranda	MIMAT0005835	mmu-miR-1b-5p	Amigo2	105827	ENSMUSG00000048218	-0.9787
miranda	MIMAT0005835	mmu-miR-1b-5p	Syt1	20979	ENSMUSG00000035864	-0.9779
miranda	MIMAT0005835	mmu-miR-1b-5p	Sfr1	67788	ENSMUSG00000025066	-0.9774
miranda	MIMAT0005835	mmu-miR-1b-5p	Trim6	94088	ENSMUSG00000072244	-0.9764
miranda	MIMAT0005835	mmu-miR-1b-5p	D6Wsu163e	28040	ENSMUSG00000030347	-0.9761
miranda	MIMAT0005835	mmu-miR-1b-5p	Tmem161b	72745	ENSMUSG00000035762	-0.9759
miranda	MIMAT0005835	mmu-miR-1b-5p	Dmrtc1c1	71083	ENSMUSG00000067562	-0.9754
miranda	MIMAT0005835	mmu-miR-1b-5p	Dmrtc1c2	71083	ENSMUSG00000067561	-0.9754
miranda	MIMAT0005835	mmu-miR-1b-5p	Pdcl	67466	ENSMUSG00000009030	-0.9749
miranda	MIMAT0005835	mmu-miR-1b-5p	Mef2c	17260	ENSMUSG00000005583	-0.9747
miranda	MIMAT0005835	mmu-miR-1b-5p	Gria2	14800	ENSMUSG00000033981	-0.9743
miranda	MIMAT0005835	mmu-miR-1b-5p	Zfp354b	27274	ENSMUSG00000020335	-0.9734
miranda	MIMAT0005835	mmu-miR-1b-5p	Cyld	74256	ENSMUSG00000036712	-0.9733
miranda	MIMAT0005835	mmu-miR-1b-5p	Rp2h	19889	ENSMUSG00000060090	-0.9724
miranda	MIMAT0005835	mmu-miR-1b-5p	Vmn2r-ps14	545700		-0.9724
miranda	MIMAT0005835	mmu-miR-1b-5p	Slc23a2	54338	ENSMUSG00000027340	-0.97
miranda	MIMAT0005835	mmu-miR-1b-5p	Omd	27047	ENSMUSG00000048368	-0.9696
miranda	MIMAT0005835	mmu-miR-1b-5p	Cyp2b23	243881	ENSMUSG00000040650	-0.9689
miranda	MIMAT0005835	mmu-miR-1b-5p	Fam65b	193385	ENSMUSG00000036006	-0.9683
miranda	MIMAT0005835	mmu-miR-1b-5p	Tomm70a	28185	ENSMUSG00000022752	-0.9682
miranda	MIMAT0005835	mmu-miR-1b-5p	Emx2	13797	ENSMUSG00000043969	-0.9678
miranda	MIMAT0005835	mmu-miR-1b-5p	Sdpr	20324	ENSMUSG00000045954	-0.9675
miranda	MIMAT0005835	mmu-miR-1b-5p	Anxa10	26359	ENSMUSG00000031635	-0.9674
miranda	MIMAT0005835	mmu-miR-1b-5p	Gm4956	241041		-0.967
miranda	MIMAT0005835	mmu-miR-1b-5p	Dmrtc1c2	71083	ENSMUSG00000067561	-0.9669
miranda	MIMAT0005835	mmu-miR-1b-5p	Dmrtc1c1	71083	ENSMUSG00000067562	-0.9669
miranda	MIMAT0005835	mmu-miR-1b-5p	Nrxn1	18189	ENSMUSG00000024109	-0.9666
miranda	MIMAT0005835	mmu-miR-1b-5p	Pear1	73182	ENSMUSG00000028073	-0.9666
miranda	MIMAT0005835	mmu-miR-1b-5p	Trim34a	94094	ENSMUSG00000056144	-0.9633
miranda	MIMAT0005835	mmu-miR-1b-5p	Pnn	18949	ENSMUSG00000020994	-0.9629
miranda	MIMAT0005835	mmu-miR-1b-5p	Msn	17698	ENSMUSG00000031207	-0.9628
miranda	MIMAT0005835	mmu-miR-1b-5p	Wdr35	74682	ENSMUSG00000066643	-0.9623
miranda	MIMAT0005835	mmu-miR-1b-5p	Hnmt	140483	ENSMUSG00000026986	-0.9615
miranda	MIMAT0005835	mmu-miR-1b-5p	Hmg20a	66867	ENSMUSG00000032329	-0.9611
miranda	MIMAT0005835	mmu-miR-1b-5p	Cpz	242939	ENSMUSG00000036596	-0.9605
miranda	MIMAT0005835	mmu-miR-1b-5p	Nxph2	18232	ENSMUSG00000069132	-0.9596
miranda	MIMAT0005835	mmu-miR-1b-5p	Ifi44	99899	ENSMUSG00000028037	-0.9588
miranda	MIMAT0005835	mmu-miR-1b-5p	Adam3	11497	ENSMUSG00000031553	-0.9584
miranda	MIMAT0005835	mmu-miR-1b-5p	Kcnh5	238271	ENSMUSG00000034402	-0.9582
miranda	MIMAT0005835	mmu-miR-1b-5p	Ythdf3	229096	ENSMUSG00000047213	-0.9576
miranda	MIMAT0005835	mmu-miR-1b-5p	Igf2bp1	140486	ENSMUSG00000013415	-0.9574
miranda	MIMAT0005835	mmu-miR-1b-5p	F13b	14060	ENSMUSG00000026368	-0.9573
miranda	MIMAT0005835	mmu-miR-1b-5p	Gpr165	76206	ENSMUSG00000031210	-0.9571
miranda	MIMAT0005835	mmu-miR-1b-5p	Fbxl5	242960	ENSMUSG00000039753	-0.957
miranda	MIMAT0005835	mmu-miR-1b-5p	Atrn	11990	ENSMUSG00000027312	-0.9565
miranda	MIMAT0005835	mmu-miR-1b-5p	Dnajb11	67838	ENSMUSG00000004460	-0.9563
miranda	MIMAT0005835	mmu-miR-1b-5p	Nlrc4	268973	ENSMUSG00000039193	-0.956
miranda	MIMAT0005835	mmu-miR-1b-5p	Snx6	72183	ENSMUSG00000005656	-0.9557
miranda	MIMAT0005835	mmu-miR-1b-5p	Ttc23	67009	ENSMUSG00000030555	-0.9554
miranda	MIMAT0005835	mmu-miR-1b-5p	1700095A21Rik	67524		-0.9545
miranda	MIMAT0005835	mmu-miR-1b-5p	Rora	19883	ENSMUSG00000032238	-0.9545
miranda	MIMAT0005835	mmu-miR-1b-5p	Mtm1	17772	ENSMUSG00000031337	-0.954
miranda	MIMAT0005835	mmu-miR-1b-5p	Glipr1l2	67537	ENSMUSG00000020214	-0.9539
miranda	MIMAT0005835	mmu-miR-1b-5p	1810014B01Rik	66263		-0.9537
miranda	MIMAT0005835	mmu-miR-1b-5p	Tpp2	22019	ENSMUSG00000041763	-0.9536
miranda	MIMAT0005835	mmu-miR-1b-5p	Zcchc2	227449	ENSMUSG00000038866	-0.952
mirdb	MIMAT0005835	mmu-miR-1b-5p	Pes1	64934	ENSMUSG00000020430	99.8905
mirdb	MIMAT0005835	mmu-miR-1b-5p	Kat7	217127	ENSMUSG00000038909	99.8254
mirdb	MIMAT0005835	mmu-miR-1b-5p	Tspan3	56434	ENSMUSG00000032324	98.6165
mirdb	MIMAT0005835	mmu-miR-1b-5p	Pfkfb2	18640	ENSMUSG00000026409	94.4927
mirdb	MIMAT0005835	mmu-miR-1b-5p	Neurog2	11924	ENSMUSG00000027967	93.9599
mirdb	MIMAT0005835	mmu-miR-1b-5p	Zbtb44	235132	ENSMUSG00000047412	93.0757
mirdb	MIMAT0005835	mmu-miR-1b-5p	Impad1	242291	ENSMUSG00000066324	92.1688
mirdb	MIMAT0005835	mmu-miR-1b-5p	Rab11a	53869	ENSMUSG00000004771	91.0415
mirdb	MIMAT0005835	mmu-miR-1b-5p	Ms4a4b	60361	ENSMUSG00000056290	90.6196
mirdb	MIMAT0005835	mmu-miR-1b-5p	Ctdspl2	329506	ENSMUSG00000033411	88.8147
mirdb	MIMAT0005835	mmu-miR-1b-5p	Hsdl2	72479	ENSMUSG00000028383	88.7801
mirdb	MIMAT0005835	mmu-miR-1b-5p	Armc4	74934	ENSMUSG00000061802	88.6376
mirdb	MIMAT0005835	mmu-miR-1b-5p	A630001G21Rik	319997	ENSMUSG00000052760	88.3352
mirdb	MIMAT0005835	mmu-miR-1b-5p	Riok3	66878	ENSMUSG00000024404	88.2442
mirdb	MIMAT0005835	mmu-miR-1b-5p	B3galt2	26878	ENSMUSG00000033849	88.1143
mirdb	MIMAT0005835	mmu-miR-1b-5p	Map3k2	26405	ENSMUSG00000024383	87.5936
mirdb	MIMAT0005835	mmu-miR-1b-5p	Tbl1xr1	81004	ENSMUSG00000027630	87.4784
mirdb	MIMAT0005835	mmu-miR-1b-5p	Cnot6l	231464	ENSMUSG00000034724	87.3508
mirdb	MIMAT0005835	mmu-miR-1b-5p	Tra2b	20462	ENSMUSG00000022858	87.1353
mirdb	MIMAT0005835	mmu-miR-1b-5p	Rorb	225998	ENSMUSG00000036192	86.5663
mirdb	MIMAT0005835	mmu-miR-1b-5p	Iws1	73473	ENSMUSG00000024384	85.7412
mirdb	MIMAT0005835	mmu-miR-1b-5p	Fam196b	574403	ENSMUSG00000069911	85.6691
mirdb	MIMAT0005835	mmu-miR-1b-5p	Ehf	13661	ENSMUSG00000012350	85.514
mirdb	MIMAT0005835	mmu-miR-1b-5p	Gnpda2	67980	ENSMUSG00000029209	85.291
mirdb	MIMAT0005835	mmu-miR-1b-5p	AA987161	100416706	ENSMUSG00000058093	84.9812
mirdb	MIMAT0005835	mmu-miR-1b-5p	Phip	83946	ENSMUSG00000032253	84.4088
mirdb	MIMAT0005835	mmu-miR-1b-5p	Trmt2a	15547	ENSMUSG00000022721	84.3208
mirdb	MIMAT0005835	mmu-miR-1b-5p	Foxr2	436240	ENSMUSG00000071665	84.1673
mirdb	MIMAT0005835	mmu-miR-1b-5p	Gabra2	14395	ENSMUSG00000000560	83.9849
mirdb	MIMAT0005835	mmu-miR-1b-5p	Gpkow	209416	ENSMUSG00000031148	83.7213
mirdb	MIMAT0005835	mmu-miR-1b-5p	Cyld	74256	ENSMUSG00000036712	83.6911
pita	MIMAT0005835	mmu-miR-1b-5p	Ccr2	12772	ENSMUSG00000049103	-17.51
pita	MIMAT0005835	mmu-miR-1b-5p	Diras1	208666	ENSMUSG00000043670	-15.66
pita	MIMAT0005835	mmu-miR-1b-5p	Diras1	208666	ENSMUSG00000043670	-14.98
pita	MIMAT0005835	mmu-miR-1b-5p	Gpr146	80290	ENSMUSG00000044197	-14.81
pita	MIMAT0005835	mmu-miR-1b-5p	Diras1	208666	ENSMUSG00000043670	-14.41
pita	MIMAT0005835	mmu-miR-1b-5p	Dzank1	241688	ENSMUSG00000037259	-14.34
pita	MIMAT0005835	mmu-miR-1b-5p	Tnfaip1	21927	ENSMUSG00000017615	-13.95
pita	MIMAT0005835	mmu-miR-1b-5p	Kcnj11	16514	ENSMUSG00000096146	-13.94
pita	MIMAT0005835	mmu-miR-1b-5p	Slc4a8	59033	ENSMUSG00000023032	-13.87
pita	MIMAT0005835	mmu-miR-1b-5p	Tspan33	232670	ENSMUSG00000001763	-13.66
pita	MIMAT0005835	mmu-miR-1b-5p	Micu2	68514	ENSMUSG00000021973	-13.39
pita	MIMAT0005835	mmu-miR-1b-5p	Arf3	11842	ENSMUSG00000051853	-13.31
pita	MIMAT0005835	mmu-miR-1b-5p	Gja1	14609	ENSMUSG00000050953	-13.1
pita	MIMAT0005835	mmu-miR-1b-5p	Alkbh1	211064	ENSMUSG00000079036	-13.03
pita	MIMAT0005835	mmu-miR-1b-5p	Sf3a1	67465	ENSMUSG00000002129	-12.99
pita	MIMAT0005835	mmu-miR-1b-5p	March11	211147	ENSMUSG00000022269	-12.98
pita	MIMAT0005835	mmu-miR-1b-5p	Lonrf1	244421	ENSMUSG00000039633	-12.83
pita	MIMAT0005835	mmu-miR-1b-5p	Ugt2b35	243085	ENSMUSG00000035811	-12.79
pita	MIMAT0005835	mmu-miR-1b-5p	Ermp1	226090	ENSMUSG00000046324	-12.71
pita	MIMAT0005835	mmu-miR-1b-5p	Lhfpl4	269788	ENSMUSG00000042873	-12.67
pita	MIMAT0005835	mmu-miR-1b-5p	Apoa5	66113	ENSMUSG00000032079	-12.62
pita	MIMAT0005835	mmu-miR-1b-5p	Ccdc68	381175	ENSMUSG00000038903	-12.55
pita	MIMAT0005835	mmu-miR-1b-5p	Otol1	229389	ENSMUSG00000027788	-12.48
pita	MIMAT0005835	mmu-miR-1b-5p	Diras1	208666	ENSMUSG00000043670	-12.47
pita	MIMAT0005835	mmu-miR-1b-5p	Dzank1	241688	ENSMUSG00000037259	-12.41
pita	MIMAT0005835	mmu-miR-1b-5p	Zfp358	140482	ENSMUSG00000047264	-12.37
pita	MIMAT0005835	mmu-miR-1b-5p	Sh3d19	27059	ENSMUSG00000028082	-12.33
pita	MIMAT0005835	mmu-miR-1b-5p	Sorbs1	20411	ENSMUSG00000025006	-12.28
pita	MIMAT0005835	mmu-miR-1b-5p	Zfp827	622675	ENSMUSG00000071064	-12.24
pita	MIMAT0005835	mmu-miR-1b-5p	B230206H07Rik			-12.24
pita	MIMAT0005835	mmu-miR-1b-5p	Rab5c	19345	ENSMUSG00000019173	-12.06
pita	MIMAT0005835	mmu-miR-1b-5p	Actr1a	54130	ENSMUSG00000025228	-12.04
pita	MIMAT0005835	mmu-miR-1b-5p	Arf3	11842	ENSMUSG00000051853	-11.91
pita	MIMAT0005835	mmu-miR-1b-5p	Acbd4			-11.81
pita	MIMAT0005835	mmu-miR-1b-5p	Rapgef1	107746	ENSMUSG00000039844	-11.77
pita	MIMAT0005835	mmu-miR-1b-5p	Syngr1	20972	ENSMUSG00000022415	-11.63
pita	MIMAT0005835	mmu-miR-1b-5p	Upf3b	68134	ENSMUSG00000036572	-11.61
pita	MIMAT0005835	mmu-miR-1b-5p	Zfp871	208292	ENSMUSG00000024298	-11.53
pita	MIMAT0005835	mmu-miR-1b-5p	Nxnl1	100047468	ENSMUSG00000034829	-11.52
pita	MIMAT0005835	mmu-miR-1b-5p	Nxnl1	234404	ENSMUSG00000034829	-11.52
pita	MIMAT0005835	mmu-miR-1b-5p	Lrch1	380916	ENSMUSG00000068015	-11.5
pita	MIMAT0005835	mmu-miR-1b-5p	Tspyl5	239364	ENSMUSG00000038984	-11.49
pita	MIMAT0005835	mmu-miR-1b-5p	Aim2	383619	ENSMUSG00000037860	-11.41
pita	MIMAT0005835	mmu-miR-1b-5p	Gys1	14936	ENSMUSG00000003865	-11.4
pita	MIMAT0005835	mmu-miR-1b-5p	Prkar2b	19088	ENSMUSG00000002997	-11.36
pita	MIMAT0005835	mmu-miR-1b-5p	St6galnac1	20445	ENSMUSG00000009588	-11.3
pita	MIMAT0005835	mmu-miR-1b-5p	Rhot1	59040	ENSMUSG00000017686	-11.27
pita	MIMAT0005835	mmu-miR-1b-5p	Zfp827	622675	ENSMUSG00000071064	-11.17
pita	MIMAT0005835	mmu-miR-1b-5p	Ebna1bp2	69072	ENSMUSG00000028729	-11.12
pita	MIMAT0005835	mmu-miR-1b-5p	Mmab	77697	ENSMUSG00000029575	-11.06
pita	MIMAT0005835	mmu-miR-1b-5p	Uba1	22201	ENSMUSG00000001924	-11.04
pita	MIMAT0005835	mmu-miR-1b-5p	Csde1	229663	ENSMUSG00000068823	-11.03
pita	MIMAT0005835	mmu-miR-1b-5p	Tob2	57259	ENSMUSG00000048546	-11.01
pita	MIMAT0005835	mmu-miR-1b-5p	Jhdm1d	338523	ENSMUSG00000042599	-10.93
pita	MIMAT0005835	mmu-miR-1b-5p	Fryl	72313	ENSMUSG00000070733	-10.93
pita	MIMAT0005835	mmu-miR-1b-5p	Ssr1	107513	ENSMUSG00000021427	-10.88
pita	MIMAT0005835	mmu-miR-1b-5p	Lrrfip1	16978	ENSMUSG00000026305	-10.88
pita	MIMAT0005835	mmu-miR-1b-5p	Pde7a	18583	ENSMUSG00000069094	-10.87
pita	MIMAT0005835	mmu-miR-1b-5p	Rap2a	76108	ENSMUSG00000051615	-10.85
pita	MIMAT0005835	mmu-miR-1b-5p	Slc13a1	55961	ENSMUSG00000029700	-10.82
pita	MIMAT0005835	mmu-miR-1b-5p	Comp	12845	ENSMUSG00000031849	-10.81
pita	MIMAT0005835	mmu-miR-1b-5p	Asxl2	75302	ENSMUSG00000037486	-10.79
pita	MIMAT0005835	mmu-miR-1b-5p	Rwdd4a	192174	ENSMUSG00000031568	-10.75
pita	MIMAT0005835	mmu-miR-1b-5p	Osbpl7	71240	ENSMUSG00000038534	-10.72
pita	MIMAT0005835	mmu-miR-1b-5p	Tubgcp5	233276	ENSMUSG00000033790	-10.72
targetscan	MIMAT0005835	mmu-miR-1b-5p	Lin52	217708	ENSMUSG00000085793	-0.454
targetscan	MIMAT0005835	mmu-miR-1b-5p	Brms1l	52592	ENSMUSG00000012076	-0.429
targetscan	MIMAT0005835	mmu-miR-1b-5p	Olfr742	258422	ENSMUSG00000068431	-0.42
targetscan	MIMAT0005835	mmu-miR-1b-5p	Rerg	232441	ENSMUSG00000030222	-0.413
targetscan	MIMAT0005835	mmu-miR-1b-5p	Chd2	244059	ENSMUSG00000078671	-0.412
targetscan	MIMAT0005835	mmu-miR-1b-5p	Tubgcp5	233276	ENSMUSG00000033790	-0.405
targetscan	MIMAT0005835	mmu-miR-1b-5p	Armc4	74934	ENSMUSG00000061802	-0.401
targetscan	MIMAT0005835	mmu-miR-1b-5p	Tpbpa	21984	ENSMUSG00000033834	-0.4
targetscan	MIMAT0005835	mmu-miR-1b-5p	Gabra2	14395	ENSMUSG00000000560	-0.396
targetscan	MIMAT0005835	mmu-miR-1b-5p	Lin9	72568	ENSMUSG00000058729	-0.394
targetscan	MIMAT0005835	mmu-miR-1b-5p	Cntrob	216846	ENSMUSG00000032782	-0.392
targetscan	MIMAT0005835	mmu-miR-1b-5p	Eme1	268465	ENSMUSG00000039055	-0.39
targetscan	MIMAT0005835	mmu-miR-1b-5p	Rab12	19328	ENSMUSG00000023460	-0.383
targetscan	MIMAT0005835	mmu-miR-1b-5p	Zfp91	109910	ENSMUSG00000024695	-0.38
targetscan	MIMAT0005835	mmu-miR-1b-5p	Pes1	64934	ENSMUSG00000020430	-0.379
targetscan	MIMAT0005835	mmu-miR-1b-5p	Hivep1	110521	ENSMUSG00000021366	-0.376
targetscan	MIMAT0005835	mmu-miR-1b-5p	2310030G06Rik	66952	ENSMUSG00000032062	-0.375
targetscan	MIMAT0005835	mmu-miR-1b-5p	Gnl3l	237107	ENSMUSG00000025266	-0.372
targetscan	MIMAT0005835	mmu-miR-1b-5p	Ttc8	76260	ENSMUSG00000021013	-0.372
targetscan	MIMAT0005835	mmu-miR-1b-5p	Fam196b	574403	ENSMUSG00000069911	-0.372
targetscan	MIMAT0005835	mmu-miR-1b-5p	Psmc6	67089	ENSMUSG00000021832	-0.372
targetscan	MIMAT0005835	mmu-miR-1b-5p	Comtd1	69156	ENSMUSG00000021773	-0.371
targetscan	MIMAT0005835	mmu-miR-1b-5p	Ints8	72656	ENSMUSG00000040738	-0.37
targetscan	MIMAT0005835	mmu-miR-1b-5p	Pgam5	72542	ENSMUSG00000029500	-0.368
targetscan	MIMAT0005835	mmu-miR-1b-5p	Sntg1	71096	ENSMUSG00000025909	-0.366
targetscan	MIMAT0005835	mmu-miR-1b-5p	Krit1	79264	ENSMUSG00000000600	-0.366
targetscan	MIMAT0005835	mmu-miR-1b-5p	Ccdc68	381175	ENSMUSG00000038903	-0.364
targetscan	MIMAT0005835	mmu-miR-1b-5p	Sostdc1	66042	ENSMUSG00000036169	-0.362
targetscan	MIMAT0005835	mmu-miR-1b-5p	Neurog2	11924	ENSMUSG00000027967	-0.359
targetscan	MIMAT0005835	mmu-miR-1b-5p	Pdgfrl	68797	ENSMUSG00000031595	-0.359
targetscan	MIMAT0005835	mmu-miR-1b-5p	Csnk1g3	70425	ENSMUSG00000073563	-0.354
targetscan	MIMAT0005835	mmu-miR-1b-5p	Gnpda2	67980	ENSMUSG00000029209	-0.353
targetscan	MIMAT0005835	mmu-miR-1b-5p	Hoxd1	15429	ENSMUSG00000042448	-0.353
targetscan	MIMAT0005835	mmu-miR-1b-5p	Ubtd2	327900	ENSMUSG00000044949	-0.352
targetscan	MIMAT0005835	mmu-miR-1b-5p	Slc41a2	338365	ENSMUSG00000034591	-0.35
targetscan	MIMAT0005835	mmu-miR-1b-5p	Lrrc8c	100604	ENSMUSG00000054720	-0.349
targetscan	MIMAT0005835	mmu-miR-1b-5p	Ikzf5	67143	ENSMUSG00000040167	-0.349
targetscan	MIMAT0005835	mmu-miR-1b-5p	Ms4a4b	60361	ENSMUSG00000056290	-0.347
targetscan	MIMAT0005835	mmu-miR-1b-5p	Sphkap	77629	ENSMUSG00000026163	-0.346
targetscan	MIMAT0005835	mmu-miR-1b-5p	Rnf214	235315	ENSMUSG00000042790	-0.346
targetscan	MIMAT0005835	mmu-miR-1b-5p	Riok3	66878	ENSMUSG00000024404	-0.345
targetscan	MIMAT0005835	mmu-miR-1b-5p	Neurog2	11924	ENSMUSG00000027967	-0.345
targetscan	MIMAT0005835	mmu-miR-1b-5p	Ctdspl2	329506	ENSMUSG00000033411	-0.344
targetscan	MIMAT0005835	mmu-miR-1b-5p	Cnot6l	231464	ENSMUSG00000034724	-0.343
targetscan	MIMAT0005835	mmu-miR-1b-5p	Arl14ep	212772	ENSMUSG00000027122	-0.343
targetscan	MIMAT0005835	mmu-miR-1b-5p	Sco1	52892	ENSMUSG00000069844	-0.34
targetscan	MIMAT0005835	mmu-miR-1b-5p	Ms4a4b	60361	ENSMUSG00000056290	-0.337
targetscan	MIMAT0005835	mmu-miR-1b-5p	Pxt1	69307	ENSMUSG00000045378	-0.332
targetscan	MIMAT0005835	mmu-miR-1b-5p	Shprh	268281	ENSMUSG00000090112	-0.331
targetscan	MIMAT0005835	mmu-miR-1b-5p	Hepacam2	101202	ENSMUSG00000044156	-0.33
targetscan	MIMAT0005835	mmu-miR-1b-5p	Snai2	20583	ENSMUSG00000022676	-0.328
targetscan	MIMAT0005835	mmu-miR-1b-5p	Lmln	239833	ENSMUSG00000022802	-0.327
targetscan	MIMAT0005835	mmu-miR-1b-5p	Rasa2	114713	ENSMUSG00000032413	-0.325
targetscan	MIMAT0005835	mmu-miR-1b-5p	Zfp804a	241514	ENSMUSG00000070866	-0.324
targetscan	MIMAT0005835	mmu-miR-1b-5p	Pck1	18534	ENSMUSG00000027513	-0.324
targetscan	MIMAT0005835	mmu-miR-1b-5p	Pes1	64934	ENSMUSG00000020430	-0.324
targetscan	MIMAT0005835	mmu-miR-1b-5p	Tspan3	56434	ENSMUSG00000032324	-0.323
targetscan	MIMAT0005835	mmu-miR-1b-5p	Pvrl4	71740	ENSMUSG00000006411	-0.322
targetscan	MIMAT0005835	mmu-miR-1b-5p	Fam65b	193385	ENSMUSG00000036006	-0.32
targetscan	MIMAT0005835	mmu-miR-1b-5p	Mcm3	17215	ENSMUSG00000041859	-0.32
targetscan	MIMAT0005835	mmu-miR-1b-5p	Map10	74393	ENSMUSG00000050930	-0.319
targetscan	MIMAT0005835	mmu-miR-1b-5p	Ccnh	66671	ENSMUSG00000021548	-0.319
targetscan	MIMAT0005835	mmu-miR-1b-5p	Mars2	212679	ENSMUSG00000046994	-0.319
targetscan	MIMAT0005835	mmu-miR-1b-5p	Npm1	18148	ENSMUSG00000057113	-0.318
targetscan	MIMAT0005835	mmu-miR-1b-5p	Cxcl10	15945	ENSMUSG00000034855	-0.315
targetscan	MIMAT0005835	mmu-miR-1b-5p	Crygb	12965	ENSMUSG00000073658	-0.315
targetscan	MIMAT0005835	mmu-miR-1b-5p	Plscr2	18828	ENSMUSG00000032372	-0.315
targetscan	MIMAT0005835	mmu-miR-1b-5p	Acap2	78618	ENSMUSG00000049076	-0.314
targetscan	MIMAT0005835	mmu-miR-1b-5p	Dhrs7	66375	ENSMUSG00000021094	-0.313
targetscan	MIMAT0005835	mmu-miR-1b-5p	Zbtb44	235132	ENSMUSG00000047412	-0.312
targetscan	MIMAT0005835	mmu-miR-1b-5p	Wdr44	72404	ENSMUSG00000036769	-0.311
targetscan	MIMAT0005835	mmu-miR-1b-5p	Dleu7	239133	ENSMUSG00000048281	-0.311
targetscan	MIMAT0005835	mmu-miR-1b-5p	Ptchd4	627626	ENSMUSG00000042256	-0.309
targetscan	MIMAT0005835	mmu-miR-1b-5p	Olfr1426	258805	ENSMUSG00000044994	-0.309
targetscan	MIMAT0005835	mmu-miR-1b-5p	Mecom	14013	ENSMUSG00000027684	-0.309
targetscan	MIMAT0005835	mmu-miR-1b-5p	Svil	225115	ENSMUSG00000024236	-0.308
targetscan	MIMAT0005835	mmu-miR-1b-5p	Frmd5	228564	ENSMUSG00000027238	-0.308
targetscan	MIMAT0005835	mmu-miR-1b-5p	Abi2	329165	ENSMUSG00000026782	-0.307
targetscan	MIMAT0005835	mmu-miR-1b-5p	Zfp612	234725	ENSMUSG00000044676	-0.307
targetscan	MIMAT0005835	mmu-miR-1b-5p	Eif2a	229317	ENSMUSG00000027810	-0.306
targetscan	MIMAT0005835	mmu-miR-1b-5p	Slc22a8	19879	ENSMUSG00000063796	-0.306
targetscan	MIMAT0005835	mmu-miR-1b-5p	Arhgap15	76117	ENSMUSG00000049744	-0.305
targetscan	MIMAT0005835	mmu-miR-1b-5p	Pnrc1	108767	ENSMUSG00000040128	-0.304
targetscan	MIMAT0005835	mmu-miR-1b-5p	Nrk	27206	ENSMUSG00000052854	-0.303
targetscan	MIMAT0005835	mmu-miR-1b-5p	Tgoln1	22135	ENSMUSG00000056429	-0.301
targetscan	MIMAT0005835	mmu-miR-1b-5p	Enpp4	224794	ENSMUSG00000023961	-0.301
targetscan	MIMAT0005835	mmu-miR-1b-5p	Abcf3	27406	ENSMUSG00000003234	-0.301
targetscan	MIMAT0005835	mmu-miR-1b-5p	Rabgap1	227800	ENSMUSG00000035437	-0.299
targetscan	MIMAT0005835	mmu-miR-1b-5p	Trpm3	226025	ENSMUSG00000052387	-0.298
targetscan	MIMAT0005835	mmu-miR-1b-5p	Iltifb	116849	ENSMUSG00000090461	-0.298
targetscan	MIMAT0005835	mmu-miR-1b-5p	Gpr87	84111	ENSMUSG00000051431	-0.298
targetscan	MIMAT0005835	mmu-miR-1b-5p	Trpm3	226025	ENSMUSG00000052387	-0.297
targetscan	MIMAT0005835	mmu-miR-1b-5p	Tcf12	21406	ENSMUSG00000032228	-0.296
targetscan	MIMAT0005835	mmu-miR-1b-5p	Tns3	319939	ENSMUSG00000020422	-0.296
targetscan	MIMAT0005835	mmu-miR-1b-5p	Zfp459	328274	ENSMUSG00000055560	-0.295
targetscan	MIMAT0005835	mmu-miR-1b-5p	Mycbp	56309	ENSMUSG00000028647	-0.294
targetscan	MIMAT0005835	mmu-miR-1b-5p	Smarca5	93762	ENSMUSG00000031715	-0.294
targetscan	MIMAT0005835	mmu-miR-1b-5p	Dnajb11	67838	ENSMUSG00000004460	-0.294
targetscan	MIMAT0005835	mmu-miR-1b-5p	F13b	14060	ENSMUSG00000026368	-0.291
targetscan	MIMAT0005835	mmu-miR-1b-5p	Arg1	11846	ENSMUSG00000019987	-0.291
targetscan	MIMAT0005835	mmu-miR-1b-5p	Chrdl1	83453	ENSMUSG00000031283	-0.29
targetscan	MIMAT0005835	mmu-miR-1b-5p	Tmem108	81907	ENSMUSG00000042757	-0.29
targetscan	MIMAT0005835	mmu-miR-1b-5p	Tet3	194388	ENSMUSG00000034832	-0.29
targetscan	MIMAT0005835	mmu-miR-1b-5p	Tnrc6c	217351	ENSMUSG00000025571	-0.29
targetscan	MIMAT0005835	mmu-miR-1b-5p	Asap1	13196	ENSMUSG00000022377	-0.29
targetscan	MIMAT0005835	mmu-miR-1b-5p	C530008M17Rik	320827	ENSMUSG00000036377	-0.288
targetscan	MIMAT0005835	mmu-miR-1b-5p	Cenpj	219103	ENSMUSG00000064128	-0.287
targetscan	MIMAT0005835	mmu-miR-1b-5p	Serpina7	331535	ENSMUSG00000031271	-0.286
targetscan	MIMAT0005835	mmu-miR-1b-5p	Dcn	13179	ENSMUSG00000019929	-0.285
targetscan	MIMAT0005835	mmu-miR-1b-5p	Fam78b	226610	ENSMUSG00000060568	-0.283
targetscan	MIMAT0005835	mmu-miR-1b-5p	Wdr78	242584	ENSMUSG00000035126	-0.283
targetscan	MIMAT0005835	mmu-miR-1b-5p	Serpinb9d	20726	ENSMUSG00000054266	-0.283
targetscan	MIMAT0005835	mmu-miR-1b-5p	Serbp1	66870	ENSMUSG00000036371	-0.283
targetscan	MIMAT0005835	mmu-miR-1b-5p	Ccdc127	67433	ENSMUSG00000021578	-0.281
targetscan	MIMAT0005835	mmu-miR-1b-5p	Zfp462	242466	ENSMUSG00000060206	-0.281
targetscan	MIMAT0005835	mmu-miR-1b-5p	Tnik	665113	ENSMUSG00000027692	-0.281
targetscan	MIMAT0005835	mmu-miR-1b-5p	Zcchc18	66995	ENSMUSG00000031428	-0.279
targetscan	MIMAT0005835	mmu-miR-1b-5p	Hsdl2	72479	ENSMUSG00000028383	-0.278
targetscan	MIMAT0005835	mmu-miR-1b-5p	Rmdn2	381110	ENSMUSG00000036368	-0.278
targetscan	MIMAT0005835	mmu-miR-1b-5p	Mier3	218613	ENSMUSG00000032727	-0.277
targetscan	MIMAT0005835	mmu-miR-1b-5p	Pls3	102866	ENSMUSG00000016382	-0.277
targetscan	MIMAT0005835	mmu-miR-1b-5p	Ppp1r21	73825	ENSMUSG00000034709	-0.276
targetscan	MIMAT0005835	mmu-miR-1b-5p	Lrrfip1	16978	ENSMUSG00000026305	-0.276
targetscan	MIMAT0005835	mmu-miR-1b-5p	C2cd3	277939	ENSMUSG00000047248	-0.275
targetscan	MIMAT0005835	mmu-miR-1b-5p	Tfb2m	15278	ENSMUSG00000026492	-0.273
targetscan	MIMAT0005835	mmu-miR-1b-5p	Vstm2b	58188	ENSMUSG00000039257	-0.273
targetscan	MIMAT0005835	mmu-miR-1b-5p	Zfp641	239652	ENSMUSG00000022987	-0.271
targetscan	MIMAT0005835	mmu-miR-1b-5p	Arsj	271970	ENSMUSG00000046561	-0.27
targetscan	MIMAT0005835	mmu-miR-1b-5p	Ift80	68259	ENSMUSG00000027778	-0.27
targetscan	MIMAT0005835	mmu-miR-1b-5p	Cyp2b10	13088	ENSMUSG00000030483	-0.268
targetscan	MIMAT0005835	mmu-miR-1b-5p	Hipk1	15257	ENSMUSG00000008730	-0.268
targetscan	MIMAT0005835	mmu-miR-1b-5p	Slitrk6	239250	ENSMUSG00000045871	-0.268
targetscan	MIMAT0005835	mmu-miR-1b-5p	Arpc1a	56443	ENSMUSG00000029621	-0.267
targetscan	MIMAT0005835	mmu-miR-1b-5p	Cdk5r1	12569	ENSMUSG00000048895	-0.267
targetscan	MIMAT0005835	mmu-miR-1b-5p	Itsn1	16443	ENSMUSG00000022957	-0.267
targetscan	MIMAT0005835	mmu-miR-1b-5p	Eif5	217869	ENSMUSG00000021282	-0.266
targetscan	MIMAT0005835	mmu-miR-1b-5p	Eid2	386655	ENSMUSG00000046058	-0.266
targetscan	MIMAT0005835	mmu-miR-1b-5p	Fam26e	103511	ENSMUSG00000049872	-0.265
targetscan	MIMAT0005835	mmu-miR-1b-5p	Slc16a1	20501	ENSMUSG00000032902	-0.264
targetscan	MIMAT0005835	mmu-miR-1b-5p	Eps15	13858	ENSMUSG00000028552	-0.263
targetscan	MIMAT0005835	mmu-miR-1b-5p	Zbtb6	241322	ENSMUSG00000066798	-0.263
targetscan	MIMAT0005835	mmu-miR-1b-5p	AA987161	100416706	ENSMUSG00000058093	-0.263
targetscan	MIMAT0005835	mmu-miR-1b-5p	Cetn3	12626	ENSMUSG00000021537	-0.262
targetscan	MIMAT0005835	mmu-miR-1b-5p	Pcf11	74737	ENSMUSG00000041328	-0.262
targetscan	MIMAT0005835	mmu-miR-1b-5p	3110001I22Rik	66598	ENSMUSG00000079737	-0.262
targetscan	MIMAT0005835	mmu-miR-1b-5p	9030612E09Rik	74530		-0.262
targetscan	MIMAT0005835	mmu-miR-1b-5p	Suco	226551	ENSMUSG00000040297	-0.261
targetscan	MIMAT0005835	mmu-miR-1b-5p	Synpr	72003	ENSMUSG00000056296	-0.261
targetscan	MIMAT0005835	mmu-miR-1b-5p	Phf20	228829	ENSMUSG00000038116	-0.261
targetscan	MIMAT0005835	mmu-miR-1b-5p	Pds5b	100710	ENSMUSG00000034021	-0.26
targetscan	MIMAT0005835	mmu-miR-1b-5p	Mtm1	17772	ENSMUSG00000031337	-0.259
targetscan	MIMAT0005835	mmu-miR-1b-5p	Ugt2b35	243085	ENSMUSG00000035811	-0.258
targetscan	MIMAT0005835	mmu-miR-1b-5p	Vax2	24113	ENSMUSG00000034777	-0.258
targetscan	MIMAT0005835	mmu-miR-1b-5p	Ap3s1	11777	ENSMUSG00000024480	-0.258
targetscan	MIMAT0005835	mmu-miR-1b-5p	Slc7a6os	66432	ENSMUSG00000033106	-0.257
targetscan	MIMAT0005835	mmu-miR-1b-5p	Hspa13	110920	ENSMUSG00000032932	-0.257
targetscan	MIMAT0005835	mmu-miR-1b-5p	Pdcd6ip	18571	ENSMUSG00000032504	-0.256
targetscan	MIMAT0005835	mmu-miR-1b-5p	Dppa3	73708	ENSMUSG00000046323	-0.256
targetscan	MIMAT0005835	mmu-miR-1b-5p	Nrbf2	641340	ENSMUSG00000075000	-0.255
targetscan	MIMAT0005835	mmu-miR-1b-5p	Tubgcp5	233276	ENSMUSG00000033790	-0.253
targetscan	MIMAT0005835	mmu-miR-1b-5p	L3hypdh	67217	ENSMUSG00000019718	-0.253
targetscan	MIMAT0005835	mmu-miR-1b-5p	Psma2	19166	ENSMUSG00000015671	-0.253
targetscan	MIMAT0005835	mmu-miR-1b-5p	Cops2	12848	ENSMUSG00000027206	-0.253
targetscan	MIMAT0005835	mmu-miR-1b-5p	Trpc6	22068	ENSMUSG00000031997	-0.253
targetscan	MIMAT0005835	mmu-miR-1b-5p	Kdelr2	66913	ENSMUSG00000079111	-0.252
targetscan	MIMAT0005835	mmu-miR-1b-5p	Rab11a	53869	ENSMUSG00000004771	-0.252
targetscan	MIMAT0005835	mmu-miR-1b-5p	Dcx	13193	ENSMUSG00000031285	-0.25
targetscan	MIMAT0005835	mmu-miR-1b-5p	Wnt3a	22416	ENSMUSG00000009900	-0.25
targetscan	MIMAT0005835	mmu-miR-1b-5p	Glipr1l2	67537	ENSMUSG00000020214	-0.249
targetscan	MIMAT0005835	mmu-miR-1b-5p	2610002M06Rik	67064	ENSMUSG00000031242	-0.248
targetscan	MIMAT0005835	mmu-miR-1b-5p	Gpkow	209416	ENSMUSG00000031148	-0.248
targetscan	MIMAT0005835	mmu-miR-1b-5p	Wasl	73178	ENSMUSG00000029684	-0.248
targetscan	MIMAT0005835	mmu-miR-1b-5p	Cyp2b9	13094	ENSMUSG00000040660	-0.248
targetscan	MIMAT0005835	mmu-miR-1b-5p	Tmem164	209497	ENSMUSG00000047045	-0.247
targetscan	MIMAT0005835	mmu-miR-1b-5p	Tlr4	21898	ENSMUSG00000039005	-0.246
targetscan	MIMAT0005835	mmu-miR-1b-5p	Tnfrsf19	29820	ENSMUSG00000060548	-0.246
targetscan	MIMAT0005835	mmu-miR-1b-5p	Rsbn1	229675	ENSMUSG00000044098	-0.246
targetscan	MIMAT0005835	mmu-miR-1b-5p	Zrsr2	22184	ENSMUSG00000031370	-0.245
targetscan	MIMAT0005835	mmu-miR-1b-5p	Fnd3c2	331491	ENSMUSG00000073012	-0.245
targetscan	MIMAT0005835	mmu-miR-1b-5p	Fzd7	14369	ENSMUSG00000041075	-0.245
targetscan	MIMAT0005835	mmu-miR-1b-5p	Atf1	11908	ENSMUSG00000023027	-0.244
targetscan	MIMAT0005835	mmu-miR-1b-5p	Edil3	13612	ENSMUSG00000034488	-0.244
targetscan	MIMAT0005835	mmu-miR-1b-5p	Kcnj1	56379	ENSMUSG00000041248	-0.244
targetscan	MIMAT0005835	mmu-miR-1b-5p	Olfr536	258513	ENSMUSG00000052508	-0.244
targetscan	MIMAT0005835	mmu-miR-1b-5p	Skint10	230613	ENSMUSG00000048766	-0.244
targetscan	MIMAT0005835	mmu-miR-1b-5p	Ska2	66140	ENSMUSG00000020492	-0.244
targetscan	MIMAT0005835	mmu-miR-1b-5p	Fzd5	14367	ENSMUSG00000045005	-0.243
targetscan	MIMAT0005835	mmu-miR-1b-5p	Ier3	15937	ENSMUSG00000003541	-0.243
targetscan	MIMAT0005835	mmu-miR-1b-5p	Rrp1b	72462	ENSMUSG00000058392	-0.243
targetscan	MIMAT0005835	mmu-miR-1b-5p	Rgmb	68799	ENSMUSG00000048027	-0.242
targetscan	MIMAT0005835	mmu-miR-1b-5p	Dlk1	13386	ENSMUSG00000040856	-0.242
targetscan	MIMAT0005835	mmu-miR-1b-5p	Kidins220	77480	ENSMUSG00000036333	-0.242
targetscan	MIMAT0005835	mmu-miR-1b-5p	Rasa1	218397	ENSMUSG00000021549	-0.242
targetscan	MIMAT0005835	mmu-miR-1b-5p	Exoc2	66482	ENSMUSG00000021357	-0.241
targetscan	MIMAT0005835	mmu-miR-1b-5p	Agtr1b	11608	ENSMUSG00000054988	-0.24
targetscan	MIMAT0005835	mmu-miR-1b-5p	Pid1	98496	ENSMUSG00000045658	-0.24
targetscan	MIMAT0005835	mmu-miR-1b-5p	Brca1	12189	ENSMUSG00000017146	-0.24
targetscan	MIMAT0005835	mmu-miR-1b-5p	Atp11b	76295	ENSMUSG00000037400	-0.24

## Sheet: mmu-miR-7a-5p
database	mature_mirna_acc	mature_mirna_id	target_symbol	target_entrez	target_ensembl	score
diana_microt	MIMAT0000677	mmu-miR-7a-5p	Ksr1	16706	ENSMUSG00000018334	1
diana_microt	MIMAT0000677	mmu-miR-7a-5p	Pole4	66979	ENSMUSG00000030042	1
diana_microt	MIMAT0000677	mmu-miR-7a-5p	Arid4a	238247	ENSMUSG00000048118	1
diana_microt	MIMAT0000677	mmu-miR-7a-5p	Spata2	263876	ENSMUSG00000047030	1
diana_microt	MIMAT0000677	mmu-miR-7a-5p	Pan2	103135	ENSMUSG00000005682	1
diana_microt	MIMAT0000677	mmu-miR-7a-5p	Mapkap1	227743	ENSMUSG00000038696	1
diana_microt	MIMAT0000677	mmu-miR-7a-5p	Snca	20617	ENSMUSG00000025889	1
diana_microt	MIMAT0000677	mmu-miR-7a-5p	Nrep	27528	ENSMUSG00000042834	0.999
diana_microt	MIMAT0000677	mmu-miR-7a-5p	Rgs7bp	52882	ENSMUSG00000021719	0.999
diana_microt	MIMAT0000677	mmu-miR-7a-5p	Gli3	14634	ENSMUSG00000021318	0.999
diana_microt	MIMAT0000677	mmu-miR-7a-5p	Zfp395	380912	ENSMUSG00000034522	0.999
diana_microt	MIMAT0000677	mmu-miR-7a-5p	Iglon5	210094	ENSMUSG00000013367	0.999
diana_microt	MIMAT0000677	mmu-miR-7a-5p	Esrrg	26381	ENSMUSG00000026610	0.998
diana_microt	MIMAT0000677	mmu-miR-7a-5p	Vdac1	22333	ENSMUSG00000020402	0.998
diana_microt	MIMAT0000677	mmu-miR-7a-5p	Fndc4	64339	ENSMUSG00000038552	0.998
diana_microt	MIMAT0000677	mmu-miR-7a-5p	Parp1	11545	ENSMUSG00000026496	0.997
diana_microt	MIMAT0000677	mmu-miR-7a-5p	Mroh1	223658	ENSMUSG00000022558	0.996
diana_microt	MIMAT0000677	mmu-miR-7a-5p	Rbms1	56878	ENSMUSG00000026970	0.996
diana_microt	MIMAT0000677	mmu-miR-7a-5p	Ckap4	216197	ENSMUSG00000046841	0.995
diana_microt	MIMAT0000677	mmu-miR-7a-5p	Sept8	20362	ENSMUSG00000018398	0.994
diana_microt	MIMAT0000677	mmu-miR-7a-5p	Bloc1s4	117197	ENSMUSG00000060708	0.994
diana_microt	MIMAT0000677	mmu-miR-7a-5p	Fam168a	319604	ENSMUSG00000029461	0.992
diana_microt	MIMAT0000677	mmu-miR-7a-5p	Nr4a3	18124	ENSMUSG00000028341	0.992
diana_microt	MIMAT0000677	mmu-miR-7a-5p	Ublcp1	79560	ENSMUSG00000041231	0.991
diana_microt	MIMAT0000677	mmu-miR-7a-5p	9930111J21Rik2	245240	ENSMUSG00000069892	0.991
diana_microt	MIMAT0000677	mmu-miR-7a-5p	Rnf141	67150	ENSMUSG00000030788	0.991
diana_microt	MIMAT0000677	mmu-miR-7a-5p	Ambra1	228361	ENSMUSG00000040506	0.991
diana_microt	MIMAT0000677	mmu-miR-7a-5p	Ifitm10	320802	ENSMUSG00000045777	0.99
diana_microt	MIMAT0000677	mmu-miR-7a-5p	Pom121l2	195236	ENSMUSG00000016982	0.99
diana_microt	MIMAT0000677	mmu-miR-7a-5p	Slc6a8	102857	ENSMUSG00000019558	0.989
diana_microt	MIMAT0000677	mmu-miR-7a-5p	9930111J21Rik1	245240	ENSMUSG00000069893	0.989
diana_microt	MIMAT0000677	mmu-miR-7a-5p	9930111J21Rik1	667214	ENSMUSG00000069893	0.989
diana_microt	MIMAT0000677	mmu-miR-7a-5p	Champ1	101994	ENSMUSG00000047710	0.988
diana_microt	MIMAT0000677	mmu-miR-7a-5p	Boc	117606	ENSMUSG00000022687	0.988
diana_microt	MIMAT0000677	mmu-miR-7a-5p	Trmt13	229780	ENSMUSG00000033439	0.988
diana_microt	MIMAT0000677	mmu-miR-7a-5p	Megf9	230316	ENSMUSG00000039270	0.988
diana_microt	MIMAT0000677	mmu-miR-7a-5p	Rsbn1	229675	ENSMUSG00000044098	0.988
diana_microt	MIMAT0000677	mmu-miR-7a-5p	Pbx3	18516	ENSMUSG00000038718	0.987
diana_microt	MIMAT0000677	mmu-miR-7a-5p	Rest	19712	ENSMUSG00000029249	0.987
diana_microt	MIMAT0000677	mmu-miR-7a-5p	Hhip	15245	ENSMUSG00000064325	0.986
diana_microt	MIMAT0000677	mmu-miR-7a-5p	Pik3cd	18707	ENSMUSG00000039936	0.986
diana_microt	MIMAT0000677	mmu-miR-7a-5p	Emr4	52614	ENSMUSG00000032915	0.985
diana_microt	MIMAT0000677	mmu-miR-7a-5p	Zc3h4	330474	ENSMUSG00000059273	0.985
diana_microt	MIMAT0000677	mmu-miR-7a-5p	P4ha2	18452	ENSMUSG00000018906	0.985
diana_microt	MIMAT0000677	mmu-miR-7a-5p	Asxl1	228790	ENSMUSG00000042548	0.985
diana_microt	MIMAT0000677	mmu-miR-7a-5p	Smyd5	232187	ENSMUSG00000033706	0.985
diana_microt	MIMAT0000677	mmu-miR-7a-5p	Atxn1	20238	ENSMUSG00000046876	0.984
diana_microt	MIMAT0000677	mmu-miR-7a-5p	Kcnj2	16518	ENSMUSG00000041695	0.984
diana_microt	MIMAT0000677	mmu-miR-7a-5p	Trove2	20822	ENSMUSG00000018199	0.984
diana_microt	MIMAT0000677	mmu-miR-7a-5p	Rsbn1l	242860	ENSMUSG00000039968	0.983
diana_microt	MIMAT0000677	mmu-miR-7a-5p	Ide	15925	ENSMUSG00000056999	0.983
diana_microt	MIMAT0000677	mmu-miR-7a-5p	Mrps25	64658	ENSMUSG00000014551	0.981
diana_microt	MIMAT0000677	mmu-miR-7a-5p	C4bp	12269	ENSMUSG00000026405	0.981
diana_microt	MIMAT0000677	mmu-miR-7a-5p	Cnppd1	69171	ENSMUSG00000033159	0.98
diana_microt	MIMAT0000677	mmu-miR-7a-5p	Sp1	20683	ENSMUSG00000001280	0.98
diana_microt	MIMAT0000677	mmu-miR-7a-5p	Tmem173	72512	ENSMUSG00000024349	0.979
diana_microt	MIMAT0000677	mmu-miR-7a-5p	Tfrc	22042	ENSMUSG00000022797	0.978
diana_microt	MIMAT0000677	mmu-miR-7a-5p	Tox2	269389	ENSMUSG00000074607	0.978
diana_microt	MIMAT0000677	mmu-miR-7a-5p	Wdr47	99512	ENSMUSG00000040389	0.978
diana_microt	MIMAT0000677	mmu-miR-7a-5p	Gm16314		ENSMUSG00000086965	0.978
diana_microt	MIMAT0000677	mmu-miR-7a-5p	9430020K01Rik	240185	ENSMUSG00000033960	0.977
diana_microt	MIMAT0000677	mmu-miR-7a-5p	Fam131b	76156	ENSMUSG00000029861	0.976
diana_microt	MIMAT0000677	mmu-miR-7a-5p	Tmem110	69179	ENSMUSG00000006526	0.974
diana_microt	MIMAT0000677	mmu-miR-7a-5p	Vps26a	30930	ENSMUSG00000020078	0.973
diana_microt	MIMAT0000677	mmu-miR-7a-5p	H2-Ob	15002	ENSMUSG00000041538	0.973
diana_microt	MIMAT0000677	mmu-miR-7a-5p	Hells	15201	ENSMUSG00000025001	0.973
diana_microt	MIMAT0000677	mmu-miR-7a-5p	Ttll11	74410	ENSMUSG00000026885	0.972
diana_microt	MIMAT0000677	mmu-miR-7a-5p	Cct4	12464	ENSMUSG00000007739	0.97
diana_microt	MIMAT0000677	mmu-miR-7a-5p	Zfp609	214812	ENSMUSG00000040524	0.97
diana_microt	MIMAT0000677	mmu-miR-7a-5p	Spty2d1	101685	ENSMUSG00000049516	0.969
diana_microt	MIMAT0000677	mmu-miR-7a-5p	Rreb1	68750	ENSMUSG00000039087	0.969
diana_microt	MIMAT0000677	mmu-miR-7a-5p	Gm12185	620913	ENSMUSG00000048852	0.968
diana_microt	MIMAT0000677	mmu-miR-7a-5p	Snhg11	319317	ENSMUSG00000044349	0.966
diana_microt	MIMAT0000677	mmu-miR-7a-5p	March11	211147	ENSMUSG00000022269	0.966
diana_microt	MIMAT0000677	mmu-miR-7a-5p	Med17	234959	ENSMUSG00000031935	0.964
diana_microt	MIMAT0000677	mmu-miR-7a-5p	Gjc1	14615	ENSMUSG00000034520	0.962
diana_microt	MIMAT0000677	mmu-miR-7a-5p	Ube2d3	66105	ENSMUSG00000078578	0.961
diana_microt	MIMAT0000677	mmu-miR-7a-5p	4933440M02Rik		ENSMUSG00000045928	0.961
diana_microt	MIMAT0000677	mmu-miR-7a-5p	Dcstamp	75766	ENSMUSG00000022303	0.961
diana_microt	MIMAT0000677	mmu-miR-7a-5p	Cggbp1	106143	ENSMUSG00000054604	0.96
diana_microt	MIMAT0000677	mmu-miR-7a-5p	Kif16b	16558	ENSMUSG00000038844	0.959
diana_microt	MIMAT0000677	mmu-miR-7a-5p	Plcb1	18795	ENSMUSG00000051177	0.958
diana_microt	MIMAT0000677	mmu-miR-7a-5p	Arrb1	109689	ENSMUSG00000018909	0.957
diana_microt	MIMAT0000677	mmu-miR-7a-5p	Six4	20474	ENSMUSG00000034460	0.956
diana_microt	MIMAT0000677	mmu-miR-7a-5p	Rb1	19645	ENSMUSG00000022105	0.956
diana_microt	MIMAT0000677	mmu-miR-7a-5p	Gabra1	14394	ENSMUSG00000010803	0.956
diana_microt	MIMAT0000677	mmu-miR-7a-5p	Ube2d2a	56550	ENSMUSG00000091896	0.955
diana_microt	MIMAT0000677	mmu-miR-7a-5p	Aamdc	66273	ENSMUSG00000035642	0.955
diana_microt	MIMAT0000677	mmu-miR-7a-5p	Gm7120	101055764	ENSMUSG00000074634	0.954
diana_microt	MIMAT0000677	mmu-miR-7a-5p	Gm7120	633640	ENSMUSG00000074634	0.954
diana_microt	MIMAT0000677	mmu-miR-7a-5p	Stox2	71069	ENSMUSG00000038143	0.952
diana_microt	MIMAT0000677	mmu-miR-7a-5p	Ghitm	66092	ENSMUSG00000041028	0.952
diana_microt	MIMAT0000677	mmu-miR-7a-5p	Rhod	11854	ENSMUSG00000041845	0.952
diana_microt	MIMAT0000677	mmu-miR-7a-5p	Sufu	24069	ENSMUSG00000025231	0.951
diana_microt	MIMAT0000677	mmu-miR-7a-5p	Pitpna	18738	ENSMUSG00000017781	0.951
diana_microt	MIMAT0000677	mmu-miR-7a-5p	Rbfox3	52897	ENSMUSG00000025576	0.951
diana_microt	MIMAT0000677	mmu-miR-7a-5p	Kdm3b	277250	ENSMUSG00000038773	0.95
diana_microt	MIMAT0000677	mmu-miR-7a-5p	Hdlbp	110611	ENSMUSG00000034088	0.95
diana_microt	MIMAT0000677	mmu-miR-7a-5p	Notch3	18131	ENSMUSG00000038146	0.949
diana_microt	MIMAT0000677	mmu-miR-7a-5p	Adamts8	30806	ENSMUSG00000031994	0.949
diana_microt	MIMAT0000677	mmu-miR-7a-5p	Gm10417		ENSMUSG00000094646	0.947
diana_microt	MIMAT0000677	mmu-miR-7a-5p	Mrgprf	211577	ENSMUSG00000031070	0.947
diana_microt	MIMAT0000677	mmu-miR-7a-5p	Slc26a2	13521	ENSMUSG00000034320	0.947
diana_microt	MIMAT0000677	mmu-miR-7a-5p	3110001I22Rik	66598	ENSMUSG00000079737	0.946
diana_microt	MIMAT0000677	mmu-miR-7a-5p	Serpina12	68054	ENSMUSG00000041567	0.945
diana_microt	MIMAT0000677	mmu-miR-7a-5p	Gm9990		ENSMUSG00000056106	0.945
diana_microt	MIMAT0000677	mmu-miR-7a-5p	Abcg4	192663	ENSMUSG00000032131	0.945
diana_microt	MIMAT0000677	mmu-miR-7a-5p	Uggt1	100044322	ENSMUSG00000037470	0.945
diana_microt	MIMAT0000677	mmu-miR-7a-5p	Uggt1	320011	ENSMUSG00000037470	0.945
diana_microt	MIMAT0000677	mmu-miR-7a-5p	Capn5	12337	ENSMUSG00000035547	0.945
diana_microt	MIMAT0000677	mmu-miR-7a-5p	Nfat5	54446	ENSMUSG00000003847	0.944
diana_microt	MIMAT0000677	mmu-miR-7a-5p	Phf17	269424	ENSMUSG00000025764	0.942
diana_microt	MIMAT0000677	mmu-miR-7a-5p	Fam83a	239463	ENSMUSG00000051225	0.94
diana_microt	MIMAT0000677	mmu-miR-7a-5p	Osbpl9	100273	ENSMUSG00000028559	0.94
diana_microt	MIMAT0000677	mmu-miR-7a-5p	Lrrc59	98238	ENSMUSG00000020869	0.94
diana_microt	MIMAT0000677	mmu-miR-7a-5p	Ipo11	76582	ENSMUSG00000042590	0.94
diana_microt	MIMAT0000677	mmu-miR-7a-5p	Stxbp6	217517	ENSMUSG00000046314	0.939
diana_microt	MIMAT0000677	mmu-miR-7a-5p	Mlph	171531	ENSMUSG00000026303	0.938
diana_microt	MIMAT0000677	mmu-miR-7a-5p	Zbtb4	75580	ENSMUSG00000018750	0.937
diana_microt	MIMAT0000677	mmu-miR-7a-5p	Wipf2	68524	ENSMUSG00000038013	0.936
diana_microt	MIMAT0000677	mmu-miR-7a-5p	Bcorl1	320376	ENSMUSG00000036959	0.935
diana_microt	MIMAT0000677	mmu-miR-7a-5p	Cacng7	81904	ENSMUSG00000069806	0.935
diana_microt	MIMAT0000677	mmu-miR-7a-5p	Fam71f1	330277	ENSMUSG00000039742	0.935
diana_microt	MIMAT0000677	mmu-miR-7a-5p	Vdac3	22335	ENSMUSG00000008892	0.934
diana_microt	MIMAT0000677	mmu-miR-7a-5p	Pappa	18491	ENSMUSG00000028370	0.933
diana_microt	MIMAT0000677	mmu-miR-7a-5p	Gal3st3	545276	ENSMUSG00000047658	0.933
diana_microt	MIMAT0000677	mmu-miR-7a-5p	Mecp2	17257	ENSMUSG00000031393	0.933
diana_microt	MIMAT0000677	mmu-miR-7a-5p	Ddit4	74747	ENSMUSG00000020108	0.932
diana_microt	MIMAT0000677	mmu-miR-7a-5p	1700029H14Rik	66501	ENSMUSG00000031452	0.932
diana_microt	MIMAT0000677	mmu-miR-7a-5p	Chd3	216848	ENSMUSG00000018474	0.932
diana_microt	MIMAT0000677	mmu-miR-7a-5p	Ggt7	207182	ENSMUSG00000027603	0.931
diana_microt	MIMAT0000677	mmu-miR-7a-5p	Gtf2a1	83602	ENSMUSG00000020962	0.931
diana_microt	MIMAT0000677	mmu-miR-7a-5p	Lphn2	99633	ENSMUSG00000028184	0.929
diana_microt	MIMAT0000677	mmu-miR-7a-5p	Rimkla	194237	ENSMUSG00000048899	0.929
diana_microt	MIMAT0000677	mmu-miR-7a-5p	Rps6kb1	72508	ENSMUSG00000020516	0.929
diana_microt	MIMAT0000677	mmu-miR-7a-5p	Herpud2	80517	ENSMUSG00000008429	0.928
diana_microt	MIMAT0000677	mmu-miR-7a-5p	Slc4a7	218756	ENSMUSG00000021733	0.928
diana_microt	MIMAT0000677	mmu-miR-7a-5p	Dlgap1	224997	ENSMUSG00000003279	0.926
diana_microt	MIMAT0000677	mmu-miR-7a-5p	Rpgrip1	77945	ENSMUSG00000057132	0.925
diana_microt	MIMAT0000677	mmu-miR-7a-5p	Klf4	16600	ENSMUSG00000003032	0.923
diana_microt	MIMAT0000677	mmu-miR-7a-5p	Ogt	108155	ENSMUSG00000034160	0.922
diana_microt	MIMAT0000677	mmu-miR-7a-5p	Ctdspl	69274	ENSMUSG00000047409	0.921
diana_microt	MIMAT0000677	mmu-miR-7a-5p	Atxn7l1	380753	ENSMUSG00000020564	0.919
diana_microt	MIMAT0000677	mmu-miR-7a-5p	Il2ra	16184	ENSMUSG00000026770	0.917
diana_microt	MIMAT0000677	mmu-miR-7a-5p	Naip6	53880	ENSMUSG00000078942	0.917
diana_microt	MIMAT0000677	mmu-miR-7a-5p	Naip6	17952	ENSMUSG00000078942	0.917
diana_microt	MIMAT0000677	mmu-miR-7a-5p	Naip6	101056649	ENSMUSG00000078942	0.917
diana_microt	MIMAT0000677	mmu-miR-7a-5p	Gm10768		ENSMUSG00000074828	0.916
diana_microt	MIMAT0000677	mmu-miR-7a-5p	Otog	18419	ENSMUSG00000009487	0.916
diana_microt	MIMAT0000677	mmu-miR-7a-5p	Tpp1	12751	ENSMUSG00000030894	0.915
diana_microt	MIMAT0000677	mmu-miR-7a-5p	Pde1c	18575	ENSMUSG00000004347	0.915
diana_microt	MIMAT0000677	mmu-miR-7a-5p	Tirap	117149	ENSMUSG00000032041	0.915
diana_microt	MIMAT0000677	mmu-miR-7a-5p	Pde4d	238871	ENSMUSG00000021699	0.913
diana_microt	MIMAT0000677	mmu-miR-7a-5p	Hrnr	68723	ENSMUSG00000041991	0.913
diana_microt	MIMAT0000677	mmu-miR-7a-5p	Pde4d	100862401	ENSMUSG00000021699	0.913
diana_microt	MIMAT0000677	mmu-miR-7a-5p	Pphln1	223828	ENSMUSG00000036167	0.912
diana_microt	MIMAT0000677	mmu-miR-7a-5p	Tmem194	210035	ENSMUSG00000040195	0.911
diana_microt	MIMAT0000677	mmu-miR-7a-5p	Ptgfrn	19221	ENSMUSG00000027864	0.909
diana_microt	MIMAT0000677	mmu-miR-7a-5p	Naa60	74763	ENSMUSG00000005982	0.908
diana_microt	MIMAT0000677	mmu-miR-7a-5p	Zbtb20	56490	ENSMUSG00000022708	0.908
diana_microt	MIMAT0000677	mmu-miR-7a-5p	Gm1078	381835	ENSMUSG00000085272	0.906
diana_microt	MIMAT0000677	mmu-miR-7a-5p	Wnt16	93735	ENSMUSG00000029671	0.905
diana_microt	MIMAT0000677	mmu-miR-7a-5p	Fbxl5	242960	ENSMUSG00000039753	0.904
diana_microt	MIMAT0000677	mmu-miR-7a-5p	Crhbp	12919	ENSMUSG00000021680	0.904
diana_microt	MIMAT0000677	mmu-miR-7a-5p	Atp10a	11982	ENSMUSG00000025324	0.902
diana_microt	MIMAT0000677	mmu-miR-7a-5p	Vma21	67048	ENSMUSG00000073131	0.901
diana_microt	MIMAT0000677	mmu-miR-7a-5p	Nfrkb	235134	ENSMUSG00000042185	0.9
diana_microt	MIMAT0000677	mmu-miR-7a-5p	Dcx	13193	ENSMUSG00000031285	0.9
diana_microt	MIMAT0000677	mmu-miR-7a-5p	5730522E02Rik		ENSMUSG00000032985	0.899
diana_microt	MIMAT0000677	mmu-miR-7a-5p	Esr2	13983	ENSMUSG00000021055	0.898
diana_microt	MIMAT0000677	mmu-miR-7a-5p	Mfap1b	67532	ENSMUSG00000048222	0.898
diana_microt	MIMAT0000677	mmu-miR-7a-5p	Mfap1b	100048499	ENSMUSG00000048222	0.898
diana_microt	MIMAT0000677	mmu-miR-7a-5p	Mfap1b	100034361	ENSMUSG00000048222	0.898
diana_microt	MIMAT0000677	mmu-miR-7a-5p	Trim16	94092	ENSMUSG00000047821	0.897
diana_microt	MIMAT0000677	mmu-miR-7a-5p	Pacsin1	23969	ENSMUSG00000040276	0.896
diana_microt	MIMAT0000677	mmu-miR-7a-5p	Col1a2	12843	ENSMUSG00000029661	0.895
diana_microt	MIMAT0000677	mmu-miR-7a-5p	Uhmk1	16589	ENSMUSG00000026667	0.895
diana_microt	MIMAT0000677	mmu-miR-7a-5p	Ube2f	67921	ENSMUSG00000034343	0.895
diana_microt	MIMAT0000677	mmu-miR-7a-5p	Gm5494		ENSMUSG00000090897	0.893
diana_microt	MIMAT0000677	mmu-miR-7a-5p	Tmem167	66074	ENSMUSG00000012422	0.892
diana_microt	MIMAT0000677	mmu-miR-7a-5p	Cat	12359	ENSMUSG00000027187	0.892
diana_microt	MIMAT0000677	mmu-miR-7a-5p	Gata6	14465	ENSMUSG00000005836	0.891
diana_microt	MIMAT0000677	mmu-miR-7a-5p	Cdk7	12572	ENSMUSG00000069089	0.891
diana_microt	MIMAT0000677	mmu-miR-7a-5p	Trpm2	28240	ENSMUSG00000009292	0.891
diana_microt	MIMAT0000677	mmu-miR-7a-5p	Wwp1	107568	ENSMUSG00000041058	0.891
diana_microt	MIMAT0000677	mmu-miR-7a-5p	Serf2	378702	ENSMUSG00000074884	0.891
diana_microt	MIMAT0000677	mmu-miR-7a-5p	Ccser2	72972	ENSMUSG00000058690	0.89
diana_microt	MIMAT0000677	mmu-miR-7a-5p	Fbln5	23876	ENSMUSG00000021186	0.889
diana_microt	MIMAT0000677	mmu-miR-7a-5p	Pbx1	18514	ENSMUSG00000052534	0.888
diana_microt	MIMAT0000677	mmu-miR-7a-5p	Lrtm2	211187	ENSMUSG00000055003	0.887
diana_microt	MIMAT0000677	mmu-miR-7a-5p	Gm608	207806	ENSMUSG00000068284	0.886
diana_microt	MIMAT0000677	mmu-miR-7a-5p	Tssk2	22115	ENSMUSG00000045521	0.885
diana_microt	MIMAT0000677	mmu-miR-7a-5p	Commd1	17846	ENSMUSG00000051355	0.885
diana_microt	MIMAT0000677	mmu-miR-7a-5p	Gm839		ENSMUSG00000060416	0.885
diana_microt	MIMAT0000677	mmu-miR-7a-5p	Pfn2	18645	ENSMUSG00000027805	0.885
diana_microt	MIMAT0000677	mmu-miR-7a-5p	Elfn2	207393	ENSMUSG00000043460	0.884
diana_microt	MIMAT0000677	mmu-miR-7a-5p	Agps	228061	ENSMUSG00000042410	0.883
diana_microt	MIMAT0000677	mmu-miR-7a-5p	Nck1	17973	ENSMUSG00000032475	0.882
diana_microt	MIMAT0000677	mmu-miR-7a-5p	Rnf144a	108089	ENSMUSG00000020642	0.881
diana_microt	MIMAT0000677	mmu-miR-7a-5p	Slc4a4	54403	ENSMUSG00000060961	0.881
diana_microt	MIMAT0000677	mmu-miR-7a-5p	Cep350	74081	ENSMUSG00000033671	0.881
diana_microt	MIMAT0000677	mmu-miR-7a-5p	Klhl14	225266	ENSMUSG00000042514	0.881
diana_microt	MIMAT0000677	mmu-miR-7a-5p	Galnt3	14425	ENSMUSG00000026994	0.88
diana_microt	MIMAT0000677	mmu-miR-7a-5p	Shank2	210274	ENSMUSG00000037541	0.88
diana_microt	MIMAT0000677	mmu-miR-7a-5p	Setd8	67956	ENSMUSG00000049327	0.879
diana_microt	MIMAT0000677	mmu-miR-7a-5p	Lcp1	18826	ENSMUSG00000021998	0.876
diana_microt	MIMAT0000677	mmu-miR-7a-5p	Osbpl5	79196	ENSMUSG00000037606	0.874
diana_microt	MIMAT0000677	mmu-miR-7a-5p	Ints10	70885	ENSMUSG00000031864	0.873
diana_microt	MIMAT0000677	mmu-miR-7a-5p	Atrx	22589	ENSMUSG00000031229	0.872
diana_microt	MIMAT0000677	mmu-miR-7a-5p	Frrs1l	230235	ENSMUSG00000045589	0.871
diana_microt	MIMAT0000677	mmu-miR-7a-5p	Skp2	27401	ENSMUSG00000054115	0.87
diana_microt	MIMAT0000677	mmu-miR-7a-5p	4933426M11Rik	217684	ENSMUSG00000021133	0.87
diana_microt	MIMAT0000677	mmu-miR-7a-5p	Nlrp9b	243874	ENSMUSG00000060508	0.869
diana_microt	MIMAT0000677	mmu-miR-7a-5p	Pgm5	226041	ENSMUSG00000041731	0.868
diana_microt	MIMAT0000677	mmu-miR-7a-5p	Pax6	18508	ENSMUSG00000027168	0.868
diana_microt	MIMAT0000677	mmu-miR-7a-5p	Slc22a23	73102	ENSMUSG00000038267	0.868
diana_microt	MIMAT0000677	mmu-miR-7a-5p	2210011C24Rik	70134	ENSMUSG00000074217	0.867
diana_microt	MIMAT0000677	mmu-miR-7a-5p	Mll1	214162	ENSMUSG00000002028	0.867
diana_microt	MIMAT0000677	mmu-miR-7a-5p	Atp1b2	11932	ENSMUSG00000041329	0.867
diana_microt	MIMAT0000677	mmu-miR-7a-5p	Dhx33	216877	ENSMUSG00000040620	0.866
diana_microt	MIMAT0000677	mmu-miR-7a-5p	Crls1	66586	ENSMUSG00000027357	0.866
diana_microt	MIMAT0000677	mmu-miR-7a-5p	Tnk2	51789	ENSMUSG00000022791	0.865
diana_microt	MIMAT0000677	mmu-miR-7a-5p	G3bp2	23881	ENSMUSG00000029405	0.865
diana_microt	MIMAT0000677	mmu-miR-7a-5p	Pdk3	236900	ENSMUSG00000035232	0.863
diana_microt	MIMAT0000677	mmu-miR-7a-5p	Serp1	28146	ENSMUSG00000027808	0.863
diana_microt	MIMAT0000677	mmu-miR-7a-5p	Mkln1	27418	ENSMUSG00000025609	0.862
diana_microt	MIMAT0000677	mmu-miR-7a-5p	Faim2	72393	ENSMUSG00000023011	0.862
diana_microt	MIMAT0000677	mmu-miR-7a-5p	Zcchc7	319885	ENSMUSG00000035649	0.861
diana_microt	MIMAT0000677	mmu-miR-7a-5p	Tnfaip3	21929	ENSMUSG00000019850	0.861
diana_microt	MIMAT0000677	mmu-miR-7a-5p	Rhbdf1	13650	ENSMUSG00000020282	0.861
diana_microt	MIMAT0000677	mmu-miR-7a-5p	Sgk1	20393	ENSMUSG00000019970	0.86
diana_microt	MIMAT0000677	mmu-miR-7a-5p	Acsl4	50790	ENSMUSG00000031278	0.859
diana_microt	MIMAT0000677	mmu-miR-7a-5p	Yes1	22612	ENSMUSG00000014932	0.859
diana_microt	MIMAT0000677	mmu-miR-7a-5p	Ctnnd1	12388	ENSMUSG00000034101	0.858
diana_microt	MIMAT0000677	mmu-miR-7a-5p	4930429B21Rik		ENSMUSG00000049507	0.858
diana_microt	MIMAT0000677	mmu-miR-7a-5p	7420426K07Rik	546157	ENSMUSG00000074123	0.858
diana_microt	MIMAT0000677	mmu-miR-7a-5p	Epha3	13837	ENSMUSG00000052504	0.858
diana_microt	MIMAT0000677	mmu-miR-7a-5p	Fam53c	66306	ENSMUSG00000034300	0.857
diana_microt	MIMAT0000677	mmu-miR-7a-5p	Zkscan8	93681	ENSMUSG00000063894	0.857
diana_microt	MIMAT0000677	mmu-miR-7a-5p	Fez1	235180	ENSMUSG00000032118	0.857
diana_microt	MIMAT0000677	mmu-miR-7a-5p	Zfp704	170753	ENSMUSG00000040209	0.857
diana_microt	MIMAT0000677	mmu-miR-7a-5p	Ston2	108800	ENSMUSG00000020961	0.856
diana_microt	MIMAT0000677	mmu-miR-7a-5p	Pde4a	18577	ENSMUSG00000032177	0.856
diana_microt	MIMAT0000677	mmu-miR-7a-5p	Mrfap1	67568	ENSMUSG00000055302	0.855
diana_microt	MIMAT0000677	mmu-miR-7a-5p	Samd10	229011	ENSMUSG00000038605	0.855
diana_microt	MIMAT0000677	mmu-miR-7a-5p	Glg1	20340	ENSMUSG00000003316	0.855
diana_microt	MIMAT0000677	mmu-miR-7a-5p	Hs3st5	319415	ENSMUSG00000044499	0.854
diana_microt	MIMAT0000677	mmu-miR-7a-5p	Angptl2	26360	ENSMUSG00000004105	0.854
diana_microt	MIMAT0000677	mmu-miR-7a-5p	Ids	15931	ENSMUSG00000035847	0.853
diana_microt	MIMAT0000677	mmu-miR-7a-5p	Atg3	67841	ENSMUSG00000022663	0.853
diana_microt	MIMAT0000677	mmu-miR-7a-5p	Xcr1	23832	ENSMUSG00000060509	0.852
diana_microt	MIMAT0000677	mmu-miR-7a-5p	BC035044	232406	ENSMUSG00000090164	0.852
diana_microt	MIMAT0000677	mmu-miR-7a-5p	Snap91	20616	ENSMUSG00000033419	0.852
diana_microt	MIMAT0000677	mmu-miR-7a-5p	Phxr4		ENSMUSG00000031802	0.852
diana_microt	MIMAT0000677	mmu-miR-7a-5p	Piezo1	234839	ENSMUSG00000014444	0.852
diana_microt	MIMAT0000677	mmu-miR-7a-5p	Usp36	72344	ENSMUSG00000033909	0.851
diana_microt	MIMAT0000677	mmu-miR-7a-5p	Grm5	108071	ENSMUSG00000049583	0.851
diana_microt	MIMAT0000677	mmu-miR-7a-5p	Pes1	64934	ENSMUSG00000020430	0.851
diana_microt	MIMAT0000677	mmu-miR-7a-5p	Hecw1	94253	ENSMUSG00000021301	0.85
diana_microt	MIMAT0000677	mmu-miR-7a-5p	Pias1	56469	ENSMUSG00000032405	0.85
diana_microt	MIMAT0000677	mmu-miR-7a-5p	Mecom	14013	ENSMUSG00000027684	0.85
diana_microt	MIMAT0000677	mmu-miR-7a-5p	Tm9sf3	107358	ENSMUSG00000025016	0.85
diana_microt	MIMAT0000677	mmu-miR-7a-5p	Csnk1g1	214897	ENSMUSG00000032384	0.85
diana_microt	MIMAT0000677	mmu-miR-7a-5p	Serpinb2	18788	ENSMUSG00000062345	0.85
diana_microt	MIMAT0000677	mmu-miR-7a-5p	Atat1	73242	ENSMUSG00000024426	0.849
diana_microt	MIMAT0000677	mmu-miR-7a-5p	Myadm	50918	ENSMUSG00000068566	0.849
diana_microt	MIMAT0000677	mmu-miR-7a-5p	Tnrc6a	233833	ENSMUSG00000052707	0.849
diana_microt	MIMAT0000677	mmu-miR-7a-5p	Gak	231580	ENSMUSG00000062234	0.849
diana_microt	MIMAT0000677	mmu-miR-7a-5p	Braf	109880	ENSMUSG00000002413	0.848
diana_microt	MIMAT0000677	mmu-miR-7a-5p	Pcnxl2	270109	ENSMUSG00000060212	0.847
diana_microt	MIMAT0000677	mmu-miR-7a-5p	Dhrs9	241452	ENSMUSG00000027068	0.847
diana_microt	MIMAT0000677	mmu-miR-7a-5p	Atp6v1a	11964	ENSMUSG00000052459	0.845
diana_microt	MIMAT0000677	mmu-miR-7a-5p	Cntnap1	53321	ENSMUSG00000017167	0.845
diana_microt	MIMAT0000677	mmu-miR-7a-5p	Zfp248	72720	ENSMUSG00000030145	0.845
diana_microt	MIMAT0000677	mmu-miR-7a-5p	Ppfia3	76787	ENSMUSG00000003863	0.844
diana_microt	MIMAT0000677	mmu-miR-7a-5p	Zbtb2	381990	ENSMUSG00000075327	0.844
diana_microt	MIMAT0000677	mmu-miR-7a-5p	Shprh	268281	ENSMUSG00000090112	0.844
diana_microt	MIMAT0000677	mmu-miR-7a-5p	Slc6a11	243616	ENSMUSG00000030307	0.844
diana_microt	MIMAT0000677	mmu-miR-7a-5p	Ltn1	78913	ENSMUSG00000052299	0.844
diana_microt	MIMAT0000677	mmu-miR-7a-5p	Tcirg1	27060	ENSMUSG00000001750	0.844
diana_microt	MIMAT0000677	mmu-miR-7a-5p	Wasf3	245880	ENSMUSG00000029636	0.843
diana_microt	MIMAT0000677	mmu-miR-7a-5p	Nwd1	319555	ENSMUSG00000048148	0.843
diana_microt	MIMAT0000677	mmu-miR-7a-5p	Dkk3	50781	ENSMUSG00000030772	0.842
diana_microt	MIMAT0000677	mmu-miR-7a-5p	Nova2	384569	ENSMUSG00000030411	0.842
diana_microt	MIMAT0000677	mmu-miR-7a-5p	Spata6	67946	ENSMUSG00000034401	0.842
diana_microt	MIMAT0000677	mmu-miR-7a-5p	Ahsa2	268390	ENSMUSG00000020288	0.842
diana_microt	MIMAT0000677	mmu-miR-7a-5p	Tcf12	21406	ENSMUSG00000032228	0.842
diana_microt	MIMAT0000677	mmu-miR-7a-5p	Numa1	101706	ENSMUSG00000066306	0.841
diana_microt	MIMAT0000677	mmu-miR-7a-5p	Tmem245	242474	ENSMUSG00000055296	0.841
diana_microt	MIMAT0000677	mmu-miR-7a-5p	Nr1h2	22260	ENSMUSG00000060601	0.841
diana_microt	MIMAT0000677	mmu-miR-7a-5p	Xpo7	65246	ENSMUSG00000022100	0.84
diana_microt	MIMAT0000677	mmu-miR-7a-5p	Traf3ip1	74019	ENSMUSG00000034292	0.84
diana_microt	MIMAT0000677	mmu-miR-7a-5p	Eif3j1	78655	ENSMUSG00000027236	0.84
diana_microt	MIMAT0000677	mmu-miR-7a-5p	9930021J03Rik	240613	ENSMUSG00000046138	0.839
diana_microt	MIMAT0000677	mmu-miR-7a-5p	Taf2	319944	ENSMUSG00000037343	0.838
diana_microt	MIMAT0000677	mmu-miR-7a-5p	Ezh1	14055	ENSMUSG00000006920	0.838
diana_microt	MIMAT0000677	mmu-miR-7a-5p	Zfand4	67492	ENSMUSG00000042213	0.838
diana_microt	MIMAT0000677	mmu-miR-7a-5p	Rs1	20147	ENSMUSG00000031293	0.836
diana_microt	MIMAT0000677	mmu-miR-7a-5p	Mettl21b	100504608	ENSMUSG00000080115	0.836
diana_microt	MIMAT0000677	mmu-miR-7a-5p	C330007P06Rik	77644	ENSMUSG00000006423	0.836
diana_microt	MIMAT0000677	mmu-miR-7a-5p	Hmgcs2	15360	ENSMUSG00000027875	0.836
diana_microt	MIMAT0000677	mmu-miR-7a-5p	Sephs1	109079	ENSMUSG00000026662	0.836
diana_microt	MIMAT0000677	mmu-miR-7a-5p	Ubqln4	94232	ENSMUSG00000008604	0.835
diana_microt	MIMAT0000677	mmu-miR-7a-5p	Ctsb	13030	ENSMUSG00000021939	0.834
diana_microt	MIMAT0000677	mmu-miR-7a-5p	Sec24c	218811	ENSMUSG00000039367	0.834
diana_microt	MIMAT0000677	mmu-miR-7a-5p	Eif5b	226982	ENSMUSG00000026083	0.833
diana_microt	MIMAT0000677	mmu-miR-7a-5p	Rgs8	67792	ENSMUSG00000042671	0.832
diana_microt	MIMAT0000677	mmu-miR-7a-5p	Nrip1	268903	ENSMUSG00000048490	0.832
diana_microt	MIMAT0000677	mmu-miR-7a-5p	Gm10696	100043188	ENSMUSG00000074424	0.832
diana_microt	MIMAT0000677	mmu-miR-7a-5p	Slc5a3	53881	ENSMUSG00000089774	0.832
diana_microt	MIMAT0000677	mmu-miR-7a-5p	Eogt	101351	ENSMUSG00000035245	0.831
diana_microt	MIMAT0000677	mmu-miR-7a-5p	Elovl4	83603	ENSMUSG00000032262	0.83
diana_microt	MIMAT0000677	mmu-miR-7a-5p	Nucks1	98415	ENSMUSG00000026434	0.83
diana_microt	MIMAT0000677	mmu-miR-7a-5p	Cand1	71902	ENSMUSG00000020114	0.83
diana_microt	MIMAT0000677	mmu-miR-7a-5p	Cit	12704	ENSMUSG00000029516	0.83
diana_microt	MIMAT0000677	mmu-miR-7a-5p	Arcn1	213827	ENSMUSG00000032096	0.829
diana_microt	MIMAT0000677	mmu-miR-7a-5p	Smarcd1	83797	ENSMUSG00000023018	0.829
diana_microt	MIMAT0000677	mmu-miR-7a-5p	Cyyr1	224405	ENSMUSG00000041134	0.829
diana_microt	MIMAT0000677	mmu-miR-7a-5p	Aff1	17355	ENSMUSG00000029313	0.829
diana_microt	MIMAT0000677	mmu-miR-7a-5p	Patl1	225929	ENSMUSG00000046139	0.828
diana_microt	MIMAT0000677	mmu-miR-7a-5p	Pcbp3	59093	ENSMUSG00000001120	0.828
diana_microt	MIMAT0000677	mmu-miR-7a-5p	Mst1	15235	ENSMUSG00000032591	0.827
diana_microt	MIMAT0000677	mmu-miR-7a-5p	Zfp697	242109	ENSMUSG00000050064	0.827
diana_microt	MIMAT0000677	mmu-miR-7a-5p	Spopl	76857	ENSMUSG00000026771	0.827
diana_microt	MIMAT0000677	mmu-miR-7a-5p	Rd3	74023	ENSMUSG00000049353	0.827
diana_microt	MIMAT0000677	mmu-miR-7a-5p	Cadm3	94332	ENSMUSG00000005338	0.825
diana_microt	MIMAT0000677	mmu-miR-7a-5p	Crebrf	77128	ENSMUSG00000048249	0.825
diana_microt	MIMAT0000677	mmu-miR-7a-5p	Lyrm9	66274	ENSMUSG00000072640	0.825
diana_microt	MIMAT0000677	mmu-miR-7a-5p	Acot6	217700	ENSMUSG00000043487	0.824
diana_microt	MIMAT0000677	mmu-miR-7a-5p	Smg7	226517	ENSMUSG00000042772	0.824
diana_microt	MIMAT0000677	mmu-miR-7a-5p	Tmem230	70612	ENSMUSG00000027341	0.823
diana_microt	MIMAT0000677	mmu-miR-7a-5p	H2-Eb2	381091	ENSMUSG00000067341	0.823
diana_microt	MIMAT0000677	mmu-miR-7a-5p	Smpdl3a	57319	ENSMUSG00000019872	0.822
diana_microt	MIMAT0000677	mmu-miR-7a-5p	Col25a1	77018	ENSMUSG00000058897	0.822
diana_microt	MIMAT0000677	mmu-miR-7a-5p	Fnta	14272	ENSMUSG00000015994	0.82
diana_microt	MIMAT0000677	mmu-miR-7a-5p	Strn	268980	ENSMUSG00000024077	0.82
diana_microt	MIMAT0000677	mmu-miR-7a-5p	Cmtm3	68119	ENSMUSG00000031875	0.819
diana_microt	MIMAT0000677	mmu-miR-7a-5p	Vrtn	432677	ENSMUSG00000071235	0.818
diana_microt	MIMAT0000677	mmu-miR-7a-5p	Rhbdd1	76867	ENSMUSG00000026142	0.818
diana_microt	MIMAT0000677	mmu-miR-7a-5p	Sec22a	317717	ENSMUSG00000034473	0.818
diana_microt	MIMAT0000677	mmu-miR-7a-5p	Ipmk	69718	ENSMUSG00000060733	0.818
diana_microt	MIMAT0000677	mmu-miR-7a-5p	Ptprd	19266	ENSMUSG00000028399	0.818
diana_microt	MIMAT0000677	mmu-miR-7a-5p	B3gnt6	272411	ENSMUSG00000074004	0.817
diana_microt	MIMAT0000677	mmu-miR-7a-5p	Srgap2	14270	ENSMUSG00000026425	0.816
diana_microt	MIMAT0000677	mmu-miR-7a-5p	Fzd6	14368	ENSMUSG00000022297	0.816
diana_microt	MIMAT0000677	mmu-miR-7a-5p	4931406B18Rik	74054	ENSMUSG00000013353	0.816
diana_microt	MIMAT0000677	mmu-miR-7a-5p	Ttc14	67120	ENSMUSG00000027677	0.815
diana_microt	MIMAT0000677	mmu-miR-7a-5p	Ints7	77065	ENSMUSG00000037461	0.815
diana_microt	MIMAT0000677	mmu-miR-7a-5p	Slc16a5	217316	ENSMUSG00000045775	0.814
diana_microt	MIMAT0000677	mmu-miR-7a-5p	Cbfa2t2	12396	ENSMUSG00000038533	0.813
diana_microt	MIMAT0000677	mmu-miR-7a-5p	Chrm1	12669	ENSMUSG00000032773	0.813
diana_microt	MIMAT0000677	mmu-miR-7a-5p	Slc46a2	30936	ENSMUSG00000028386	0.812
diana_microt	MIMAT0000677	mmu-miR-7a-5p	Chat	12647	ENSMUSG00000021919	0.812
diana_microt	MIMAT0000677	mmu-miR-7a-5p	Rev3l	19714	ENSMUSG00000019841	0.812
diana_microt	MIMAT0000677	mmu-miR-7a-5p	H1f0	14958	ENSMUSG00000096210	0.811
diana_microt	MIMAT0000677	mmu-miR-7a-5p	Gmeb1	56809	ENSMUSG00000028901	0.811
diana_microt	MIMAT0000677	mmu-miR-7a-5p	Gga2	74105	ENSMUSG00000030872	0.811
diana_microt	MIMAT0000677	mmu-miR-7a-5p	Vimp		ENSMUSG00000075701	0.811
diana_microt	MIMAT0000677	mmu-miR-7a-5p	Naif1	71254	ENSMUSG00000039164	0.81
diana_microt	MIMAT0000677	mmu-miR-7a-5p	Mrps7	50529	ENSMUSG00000046756	0.81
diana_microt	MIMAT0000677	mmu-miR-7a-5p	Becn1	56208	ENSMUSG00000035086	0.809
diana_microt	MIMAT0000677	mmu-miR-7a-5p	Agpat5	52123	ENSMUSG00000031467	0.808
diana_microt	MIMAT0000677	mmu-miR-7a-5p	Rnf41	67588	ENSMUSG00000025373	0.808
diana_microt	MIMAT0000677	mmu-miR-7a-5p	Zfp473	243963	ENSMUSG00000048012	0.808
diana_microt	MIMAT0000677	mmu-miR-7a-5p	Clasp2	76499	ENSMUSG00000033392	0.807
diana_microt	MIMAT0000677	mmu-miR-7a-5p	Basp1	70350	ENSMUSG00000045763	0.807
diana_microt	MIMAT0000677	mmu-miR-7a-5p	Cldn23	71908	ENSMUSG00000055976	0.807
diana_microt	MIMAT0000677	mmu-miR-7a-5p	C230081A13Rik	244895	ENSMUSG00000074305	0.807
diana_microt	MIMAT0000677	mmu-miR-7a-5p	Gm21945	100126766	ENSMUSG00000093957	0.807
diana_microt	MIMAT0000677	mmu-miR-7a-5p	Draxin	70433	ENSMUSG00000029005	0.806
diana_microt	MIMAT0000677	mmu-miR-7a-5p	Top3b	21976	ENSMUSG00000022779	0.806
diana_microt	MIMAT0000677	mmu-miR-7a-5p	Cse1l	110750	ENSMUSG00000002718	0.806
diana_microt	MIMAT0000677	mmu-miR-7a-5p	Kpna1	16646	ENSMUSG00000022905	0.805
diana_microt	MIMAT0000677	mmu-miR-7a-5p	Cnot8	69125	ENSMUSG00000020515	0.805
diana_microt	MIMAT0000677	mmu-miR-7a-5p	Zfp148	22661	ENSMUSG00000022811	0.805
diana_microt	MIMAT0000677	mmu-miR-7a-5p	Haus6	230376	ENSMUSG00000038047	0.805
diana_microt	MIMAT0000677	mmu-miR-7a-5p	Pou4f1	18996	ENSMUSG00000048349	0.805
diana_microt	MIMAT0000677	mmu-miR-7a-5p	Fam150b	100294583	ENSMUSG00000054204	0.805
diana_microt	MIMAT0000677	mmu-miR-7a-5p	Lsamp	268890	ENSMUSG00000061080	0.805
diana_microt	MIMAT0000677	mmu-miR-7a-5p	Adcy1	432530	ENSMUSG00000020431	0.804
diana_microt	MIMAT0000677	mmu-miR-7a-5p	D230025D16Rik	234678	ENSMUSG00000031889	0.803
diana_microt	MIMAT0000677	mmu-miR-7a-5p	Nlgn2	216856	ENSMUSG00000051790	0.803
diana_microt	MIMAT0000677	mmu-miR-7a-5p	Dgki	320127	ENSMUSG00000038665	0.802
diana_microt	MIMAT0000677	mmu-miR-7a-5p	Efcab4a	213573	ENSMUSG00000048200	0.802
diana_microt	MIMAT0000677	mmu-miR-7a-5p	Eif4ebp2	13688	ENSMUSG00000020091	0.802
diana_microt	MIMAT0000677	mmu-miR-7a-5p	Slc16a9	66859	ENSMUSG00000037762	0.801
diana_microt	MIMAT0000677	mmu-miR-7a-5p	Anapc15	75430	ENSMUSG00000030649	0.801
diana_microt	MIMAT0000677	mmu-miR-7a-5p	Mrpl48	52443	ENSMUSG00000030706	0.801
diana_microt	MIMAT0000677	mmu-miR-7a-5p	Nprl3	17168	ENSMUSG00000020289	0.801
diana_microt	MIMAT0000677	mmu-miR-7a-5p	Rab5c	19345	ENSMUSG00000019173	0.8
diana_microt	MIMAT0000677	mmu-miR-7a-5p	Brd3	67382	ENSMUSG00000026918	0.799
diana_microt	MIMAT0000677	mmu-miR-7a-5p	Sec22c	215474	ENSMUSG00000061536	0.799
diana_microt	MIMAT0000677	mmu-miR-7a-5p	Tmem123	71929	ENSMUSG00000050912	0.799
diana_microt	MIMAT0000677	mmu-miR-7a-5p	Chek1	12649	ENSMUSG00000032113	0.799
diana_microt	MIMAT0000677	mmu-miR-7a-5p	2010002M12Rik	112419	ENSMUSG00000067297	0.798
diana_microt	MIMAT0000677	mmu-miR-7a-5p	Ephx3	71932	ENSMUSG00000037577	0.798
diana_microt	MIMAT0000677	mmu-miR-7a-5p	Igsf3	78908	ENSMUSG00000042035	0.798
diana_microt	MIMAT0000677	mmu-miR-7a-5p	Lsm12	268490	ENSMUSG00000020922	0.798
diana_microt	MIMAT0000677	mmu-miR-7a-5p	Slc38a2	67760	ENSMUSG00000022462	0.798
diana_microt	MIMAT0000677	mmu-miR-7a-5p	Mcc	328949	ENSMUSG00000071856	0.798
diana_microt	MIMAT0000677	mmu-miR-7a-5p	Gm16223	433882	ENSMUSG00000067285	0.796
diana_microt	MIMAT0000677	mmu-miR-7a-5p	Itch	16396	ENSMUSG00000027598	0.796
diana_microt	MIMAT0000677	mmu-miR-7a-5p	Tmem229b	268567	ENSMUSG00000046157	0.796
diana_microt	MIMAT0000677	mmu-miR-7a-5p	Ttll6	237930	ENSMUSG00000038756	0.796
diana_microt	MIMAT0000677	mmu-miR-7a-5p	Trip12	14897	ENSMUSG00000026219	0.795
diana_microt	MIMAT0000677	mmu-miR-7a-5p	Irs4	16370	ENSMUSG00000054667	0.795
diana_microt	MIMAT0000677	mmu-miR-7a-5p	Ankfy1	11736	ENSMUSG00000020790	0.794
diana_microt	MIMAT0000677	mmu-miR-7a-5p	Ost4	67695	ENSMUSG00000038803	0.793
diana_microt	MIMAT0000677	mmu-miR-7a-5p	Jhdm1d	338523	ENSMUSG00000042599	0.793
diana_microt	MIMAT0000677	mmu-miR-7a-5p	Ggta1	14594	ENSMUSG00000035778	0.793
diana_microt	MIMAT0000677	mmu-miR-7a-5p	Psme3	19192	ENSMUSG00000078652	0.792
diana_microt	MIMAT0000677	mmu-miR-7a-5p	Pebp4	73523	ENSMUSG00000022085	0.792
diana_microt	MIMAT0000677	mmu-miR-7a-5p	Trub1	72133	ENSMUSG00000025086	0.792
diana_microt	MIMAT0000677	mmu-miR-7a-5p	Mettl8	228019	ENSMUSG00000041975	0.791
diana_microt	MIMAT0000677	mmu-miR-7a-5p	Necab1	69352	ENSMUSG00000040536	0.791
diana_microt	MIMAT0000677	mmu-miR-7a-5p	Slc36a4	234967	ENSMUSG00000043885	0.791
diana_microt	MIMAT0000677	mmu-miR-7a-5p	Cdh5	12562	ENSMUSG00000031871	0.791
diana_microt	MIMAT0000677	mmu-miR-7a-5p	Ado	211488	ENSMUSG00000057134	0.79
diana_microt	MIMAT0000677	mmu-miR-7a-5p	Lzts3	241638	ENSMUSG00000037703	0.79
diana_microt	MIMAT0000677	mmu-miR-7a-5p	Chrna6	11440	ENSMUSG00000031491	0.79
diana_microt	MIMAT0000677	mmu-miR-7a-5p	Arid2	77044	ENSMUSG00000033237	0.79
diana_microt	MIMAT0000677	mmu-miR-7a-5p	Ucp3	22229	ENSMUSG00000032942	0.79
diana_microt	MIMAT0000677	mmu-miR-7a-5p	Luc7l3	67684	ENSMUSG00000020863	0.789
diana_microt	MIMAT0000677	mmu-miR-7a-5p	Cpeb2	231207	ENSMUSG00000039782	0.789
diana_microt	MIMAT0000677	mmu-miR-7a-5p	Slc16a7	20503	ENSMUSG00000020102	0.789
diana_microt	MIMAT0000677	mmu-miR-7a-5p	Smg1	233789	ENSMUSG00000030655	0.788
diana_microt	MIMAT0000677	mmu-miR-7a-5p	Ccdc64b	212733	ENSMUSG00000043782	0.788
diana_microt	MIMAT0000677	mmu-miR-7a-5p	Appbp2	66884	ENSMUSG00000018481	0.787
diana_microt	MIMAT0000677	mmu-miR-7a-5p	Mn1	433938	ENSMUSG00000070576	0.787
diana_microt	MIMAT0000677	mmu-miR-7a-5p	Nrsn1	22360	ENSMUSG00000048978	0.787
diana_microt	MIMAT0000677	mmu-miR-7a-5p	Smim20	66278	ENSMUSG00000061461	0.787
diana_microt	MIMAT0000677	mmu-miR-7a-5p	Crx	12951	ENSMUSG00000041578	0.787
diana_microt	MIMAT0000677	mmu-miR-7a-5p	Lrrc51	69358	ENSMUSG00000064307	0.786
diana_microt	MIMAT0000677	mmu-miR-7a-5p	Stau2	29819	ENSMUSG00000025920	0.786
diana_microt	MIMAT0000677	mmu-miR-7a-5p	Osbpl11	106326	ENSMUSG00000022807	0.786
diana_microt	MIMAT0000677	mmu-miR-7a-5p	Marf1	223989	ENSMUSG00000060657	0.785
diana_microt	MIMAT0000677	mmu-miR-7a-5p	Phc3	241915	ENSMUSG00000037652	0.785
diana_microt	MIMAT0000677	mmu-miR-7a-5p	Trim10	19824	ENSMUSG00000073400	0.785
diana_microt	MIMAT0000677	mmu-miR-7a-5p	Tmeff2	56363	ENSMUSG00000026109	0.785
diana_microt	MIMAT0000677	mmu-miR-7a-5p	Ralgapb	228850	ENSMUSG00000027652	0.785
diana_microt	MIMAT0000677	mmu-miR-7a-5p	Cyb5r4	266690	ENSMUSG00000032872	0.784
diana_microt	MIMAT0000677	mmu-miR-7a-5p	Efcc1	58229	ENSMUSG00000068263	0.784
diana_microt	MIMAT0000677	mmu-miR-7a-5p	Kcnj10	16513	ENSMUSG00000044708	0.784
diana_microt	MIMAT0000677	mmu-miR-7a-5p	Lrtm1	319476	ENSMUSG00000045776	0.784
diana_microt	MIMAT0000677	mmu-miR-7a-5p	Fam168b	214469	ENSMUSG00000037503	0.784
diana_microt	MIMAT0000677	mmu-miR-7a-5p	Mier2	70427	ENSMUSG00000042570	0.783
diana_microt	MIMAT0000677	mmu-miR-7a-5p	Sec24a	77371	ENSMUSG00000036391	0.783
diana_microt	MIMAT0000677	mmu-miR-7a-5p	Car12	76459	ENSMUSG00000032373	0.783
diana_microt	MIMAT0000677	mmu-miR-7a-5p	Tmem33	67878	ENSMUSG00000037720	0.783
diana_microt	MIMAT0000677	mmu-miR-7a-5p	Tnfrsf22		ENSMUSG00000090852	0.783
diana_microt	MIMAT0000677	mmu-miR-7a-5p	Pmel	20431	ENSMUSG00000025359	0.782
diana_microt	MIMAT0000677	mmu-miR-7a-5p	Eps8l1	67425	ENSMUSG00000006154	0.782
diana_microt	MIMAT0000677	mmu-miR-7a-5p	Aak1	269774	ENSMUSG00000057230	0.782
diana_microt	MIMAT0000677	mmu-miR-7a-5p	Casp9	12371	ENSMUSG00000028914	0.781
diana_microt	MIMAT0000677	mmu-miR-7a-5p	Crk	12928	ENSMUSG00000017776	0.781
diana_microt	MIMAT0000677	mmu-miR-7a-5p	Cnr2	12802	ENSMUSG00000062585	0.781
diana_microt	MIMAT0000677	mmu-miR-7a-5p	Gm12888	545677	ENSMUSG00000073764	0.781
diana_microt	MIMAT0000677	mmu-miR-7a-5p	Hoxb5	15413	ENSMUSG00000038700	0.78
diana_microt	MIMAT0000677	mmu-miR-7a-5p	Abhd17b	226016	ENSMUSG00000047368	0.779
diana_microt	MIMAT0000677	mmu-miR-7a-5p	Clcn6	26372	ENSMUSG00000029016	0.779
diana_microt	MIMAT0000677	mmu-miR-7a-5p	Mboat2	67216	ENSMUSG00000020646	0.779
diana_microt	MIMAT0000677	mmu-miR-7a-5p	Mbd2	17191	ENSMUSG00000024513	0.779
diana_microt	MIMAT0000677	mmu-miR-7a-5p	Rttn	246102	ENSMUSG00000023066	0.778
diana_microt	MIMAT0000677	mmu-miR-7a-5p	Ablim2	231148	ENSMUSG00000029095	0.777
diana_microt	MIMAT0000677	mmu-miR-7a-5p	Magi3	99470	ENSMUSG00000052539	0.777
diana_microt	MIMAT0000677	mmu-miR-7a-5p	Fam19a1	320265	ENSMUSG00000059187	0.777
diana_microt	MIMAT0000677	mmu-miR-7a-5p	Csrnp3	77771	ENSMUSG00000044647	0.777
diana_microt	MIMAT0000677	mmu-miR-7a-5p	Car7	12354	ENSMUSG00000031883	0.777
diana_microt	MIMAT0000677	mmu-miR-7a-5p	Mknk1	17346	ENSMUSG00000028708	0.776
diana_microt	MIMAT0000677	mmu-miR-7a-5p	Gm17727	100312986	ENSMUSG00000090738	0.776
diana_microt	MIMAT0000677	mmu-miR-7a-5p	Ammecr1l	225339	ENSMUSG00000041915	0.776
diana_microt	MIMAT0000677	mmu-miR-7a-5p	Lman2l	214895	ENSMUSG00000001143	0.776
diana_microt	MIMAT0000677	mmu-miR-7a-5p	Zfp593	68040	ENSMUSG00000028840	0.776
diana_microt	MIMAT0000677	mmu-miR-7a-5p	Itga4	16401	ENSMUSG00000027009	0.776
diana_microt	MIMAT0000677	mmu-miR-7a-5p	Tapt1	231225	ENSMUSG00000046985	0.775
diana_microt	MIMAT0000677	mmu-miR-7a-5p	Ttn	22138	ENSMUSG00000051747	0.774
diana_microt	MIMAT0000677	mmu-miR-7a-5p	Mynn	80732	ENSMUSG00000037730	0.774
diana_microt	MIMAT0000677	mmu-miR-7a-5p	Eif1ax	66235	ENSMUSG00000067194	0.774
diana_microt	MIMAT0000677	mmu-miR-7a-5p	A430105I19Rik	214239	ENSMUSG00000045838	0.773
diana_microt	MIMAT0000677	mmu-miR-7a-5p	Tom1l2	216810	ENSMUSG00000000538	0.773
diana_microt	MIMAT0000677	mmu-miR-7a-5p	Vdac3-ps1		ENSMUSG00000075053	0.773
diana_microt	MIMAT0000677	mmu-miR-7a-5p	Skint6	230622	ENSMUSG00000087194	0.772
diana_microt	MIMAT0000677	mmu-miR-7a-5p	Atp6v1e1	11973	ENSMUSG00000019210	0.772
diana_microt	MIMAT0000677	mmu-miR-7a-5p	Steap2	74051	ENSMUSG00000015653	0.772
diana_microt	MIMAT0000677	mmu-miR-7a-5p	Me3	109264	ENSMUSG00000030621	0.772
diana_microt	MIMAT0000677	mmu-miR-7a-5p	Ahrr	11624	ENSMUSG00000021575	0.771
diana_microt	MIMAT0000677	mmu-miR-7a-5p	Spns1	73658	ENSMUSG00000030741	0.771
diana_microt	MIMAT0000677	mmu-miR-7a-5p	Dennd4a	102442	ENSMUSG00000053641	0.771
diana_microt	MIMAT0000677	mmu-miR-7a-5p	Prrc2a	53761	ENSMUSG00000024393	0.771
diana_microt	MIMAT0000677	mmu-miR-7a-5p	Zdhhc5	228136	ENSMUSG00000034075	0.771
diana_microt	MIMAT0000677	mmu-miR-7a-5p	Zdhhc24	70605	ENSMUSG00000006463	0.77
diana_microt	MIMAT0000677	mmu-miR-7a-5p	Gpr98	110789	ENSMUSG00000069170	0.77
diana_microt	MIMAT0000677	mmu-miR-7a-5p	Syt6	54524	ENSMUSG00000027849	0.77
diana_microt	MIMAT0000677	mmu-miR-7a-5p	Scamp5	56807	ENSMUSG00000040722	0.77
diana_microt	MIMAT0000677	mmu-miR-7a-5p	Atp1b3	11933	ENSMUSG00000032412	0.77
diana_microt	MIMAT0000677	mmu-miR-7a-5p	Klhl26	234378	ENSMUSG00000055707	0.77
diana_microt	MIMAT0000677	mmu-miR-7a-5p	Zfp661	72180	ENSMUSG00000034800	0.769
diana_microt	MIMAT0000677	mmu-miR-7a-5p	Hcn1	15165	ENSMUSG00000021730	0.769
diana_microt	MIMAT0000677	mmu-miR-7a-5p	Pdgfra	18595	ENSMUSG00000029231	0.769
diana_microt	MIMAT0000677	mmu-miR-7a-5p	Sp4	20688	ENSMUSG00000025323	0.768
diana_microt	MIMAT0000677	mmu-miR-7a-5p	Gm5286		ENSMUSG00000090268	0.768
diana_microt	MIMAT0000677	mmu-miR-7a-5p	Zdhhc9	208884	ENSMUSG00000036985	0.768
diana_microt	MIMAT0000677	mmu-miR-7a-5p	Anks6	75691	ENSMUSG00000066191	0.767
diana_microt	MIMAT0000677	mmu-miR-7a-5p	Actg1	11465	ENSMUSG00000062825	0.767
diana_microt	MIMAT0000677	mmu-miR-7a-5p	Ankrd12	106585	ENSMUSG00000034647	0.766
diana_microt	MIMAT0000677	mmu-miR-7a-5p	Leng1	69757	ENSMUSG00000078813	0.766
diana_microt	MIMAT0000677	mmu-miR-7a-5p	Ccdc120	54648	ENSMUSG00000031150	0.765
diana_microt	MIMAT0000677	mmu-miR-7a-5p	Enpp5	83965	ENSMUSG00000023960	0.765
diana_microt	MIMAT0000677	mmu-miR-7a-5p	Slirp	380773	ENSMUSG00000021040	0.764
diana_microt	MIMAT0000677	mmu-miR-7a-5p	Polk	27015	ENSMUSG00000021668	0.763
diana_microt	MIMAT0000677	mmu-miR-7a-5p	2310061N02Rik	69661	ENSMUSG00000050704	0.763
diana_microt	MIMAT0000677	mmu-miR-7a-5p	Nipal4	214112	ENSMUSG00000020411	0.763
diana_microt	MIMAT0000677	mmu-miR-7a-5p	Trim67	330863	ENSMUSG00000036913	0.763
microcosm	MIMAT0000677	mmu-miR-7a-5p	Eppin	75526	ENSMUSG00000017733	19.6849
microcosm	MIMAT0000677	mmu-miR-7a-5p	Smpdl3a	57319	ENSMUSG00000019872	19.3455
microcosm	MIMAT0000677	mmu-miR-7a-5p	NP_001079000.1			19.2323
microcosm	MIMAT0000677	mmu-miR-7a-5p	Praf2	54637	ENSMUSG00000031149	19.1205
microcosm	MIMAT0000677	mmu-miR-7a-5p	Akap7	432442	ENSMUSG00000039166	19.1192
microcosm	MIMAT0000677	mmu-miR-7a-5p	Meiob	75178	ENSMUSG00000024155	19.0061
microcosm	MIMAT0000677	mmu-miR-7a-5p	Krt33a	71888	ENSMUSG00000035592	18.96
microcosm	MIMAT0000677	mmu-miR-7a-5p	Mgat2	217664	ENSMUSG00000043998	18.8929
microcosm	MIMAT0000677	mmu-miR-7a-5p	Clp1	98985	ENSMUSG00000027079	18.7257
microcosm	MIMAT0000677	mmu-miR-7a-5p	Tbx4	21387	ENSMUSG00000000094	18.6896
microcosm	MIMAT0000677	mmu-miR-7a-5p	Pdcd6	18570	ENSMUSG00000021576	18.6785
microcosm	MIMAT0000677	mmu-miR-7a-5p	Slc12a8	171286	ENSMUSG00000035506	18.6701
microcosm	MIMAT0000677	mmu-miR-7a-5p	Kcnip4	80334	ENSMUSG00000029088	18.6667
microcosm	MIMAT0000677	mmu-miR-7a-5p	Trmt13	229780	ENSMUSG00000033439	18.6667
microcosm	MIMAT0000677	mmu-miR-7a-5p	Gm11437	628813	ENSMUSG00000051452	18.6667
microcosm	MIMAT0000677	mmu-miR-7a-5p	Rps9	76846	ENSMUSG00000006333	18.6667
microcosm	MIMAT0000677	mmu-miR-7a-5p	Snrnp35	76167	ENSMUSG00000029402	18.6667
microcosm	MIMAT0000677	mmu-miR-7a-5p	Slc12a8	171286	ENSMUSG00000035506	18.6437
microcosm	MIMAT0000677	mmu-miR-7a-5p	Mrgprb4	233230	ENSMUSG00000070550	18.6195
microcosm	MIMAT0000677	mmu-miR-7a-5p	Smpdl3a	57319	ENSMUSG00000019872	18.5536
microcosm	MIMAT0000677	mmu-miR-7a-5p	Ggnbp2	217039	ENSMUSG00000020530	18.5536
microcosm	MIMAT0000677	mmu-miR-7a-5p	4930479M11Rik		ENSMUSG00000049761	18.551
microcosm	MIMAT0000677	mmu-miR-7a-5p	Hells	15201	ENSMUSG00000025001	18.5149
microcosm	MIMAT0000677	mmu-miR-7a-5p	Kctd13	233877	ENSMUSG00000030685	18.4634
microcosm	MIMAT0000677	mmu-miR-7a-5p	Slc12a9	83704	ENSMUSG00000037344	18.4427
microcosm	MIMAT0000677	mmu-miR-7a-5p	Plod3	26433	ENSMUSG00000004846	18.4404
microcosm	MIMAT0000677	mmu-miR-7a-5p	Serpinb2	18788	ENSMUSG00000062345	18.4106
microcosm	MIMAT0000677	mmu-miR-7a-5p	Tmem239	66766	ENSMUSG00000049692	18.4077
microcosm	MIMAT0000677	mmu-miR-7a-5p	4930480E11Rik	74910	ENSMUSG00000035651	18.4063
microcosm	MIMAT0000677	mmu-miR-7a-5p	Macrod2	72899	ENSMUSG00000068205	18.4061
microcosm	MIMAT0000677	mmu-miR-7a-5p	Macrod2	101056500	ENSMUSG00000068205	18.4061
microcosm	MIMAT0000677	mmu-miR-7a-5p	Dnlz	52838	ENSMUSG00000075467	18.3273
microcosm	MIMAT0000677	mmu-miR-7a-5p	Wfdc3	71856	ENSMUSG00000076434	18.3273
microcosm	MIMAT0000677	mmu-miR-7a-5p	Morn3	74890	ENSMUSG00000029477	18.3273
microcosm	MIMAT0000677	mmu-miR-7a-5p	Lrp6	16974	ENSMUSG00000030201	18.3208
microcosm	MIMAT0000677	mmu-miR-7a-5p	Spr	20751	ENSMUSG00000033735	18.2924
microcosm	MIMAT0000677	mmu-miR-7a-5p	Emcn	59308	ENSMUSG00000054690	18.2653
microcosm	MIMAT0000677	mmu-miR-7a-5p	Iqcf4	67320	ENSMUSG00000041009	18.2476
microcosm	MIMAT0000677	mmu-miR-7a-5p	Glis1	230587	ENSMUSG00000034762	18.2398
microcosm	MIMAT0000677	mmu-miR-7a-5p	Zfp768	233890	ENSMUSG00000047371	18.2373
microcosm	MIMAT0000677	mmu-miR-7a-5p	Ctsk	13038	ENSMUSG00000028111	18.2168
microcosm	MIMAT0000677	mmu-miR-7a-5p	Ide	15925	ENSMUSG00000056999	18.2142
microcosm	MIMAT0000677	mmu-miR-7a-5p	Mdk	17242	ENSMUSG00000027239	18.2142
microcosm	MIMAT0000677	mmu-miR-7a-5p	Acot5	217698	ENSMUSG00000042540	18.2142
microcosm	MIMAT0000677	mmu-miR-7a-5p	Creb3	12913	ENSMUSG00000028466	18.2142
microcosm	MIMAT0000677	mmu-miR-7a-5p	Ski	20481	ENSMUSG00000029050	18.2089
microcosm	MIMAT0000677	mmu-miR-7a-5p	BC003266			18.1848
microcosm	MIMAT0000677	mmu-miR-7a-5p	Herpud2	80517	ENSMUSG00000008429	18.1802
microcosm	MIMAT0000677	mmu-miR-7a-5p	Boc	117606	ENSMUSG00000022687	18.1514
microcosm	MIMAT0000677	mmu-miR-7a-5p	Cep152	99100	ENSMUSG00000068394	18.1468
microcosm	MIMAT0000677	mmu-miR-7a-5p	Zscan5b	170734	ENSMUSG00000058028	18.1216
microcosm	MIMAT0000677	mmu-miR-7a-5p	Ccdc23	69216	ENSMUSG00000028643	18.1142
microcosm	MIMAT0000677	mmu-miR-7a-5p	Emr4	52614	ENSMUSG00000032915	18.1037
microcosm	MIMAT0000677	mmu-miR-7a-5p	Utp11l	67205	ENSMUSG00000028907	18.101
microcosm	MIMAT0000677	mmu-miR-7a-5p	Ly6g6d	114654	ENSMUSG00000073413	18.101
microcosm	MIMAT0000677	mmu-miR-7a-5p	Asic5	58170	ENSMUSG00000028008	18.101
microcosm	MIMAT0000677	mmu-miR-7a-5p	Tbc1d19	67249	ENSMUSG00000039178	18.0885
microcosm	MIMAT0000677	mmu-miR-7a-5p	Bbs2	67378	ENSMUSG00000031755	18.0695
microcosm	MIMAT0000677	mmu-miR-7a-5p	3110001I22Rik	66598	ENSMUSG00000079737	18.0537
microcosm	MIMAT0000677	mmu-miR-7a-5p	Phyhd1	227696	ENSMUSG00000079484	18.0507
microcosm	MIMAT0000677	mmu-miR-7a-5p	Sprr2i	20763	ENSMUSG00000042157	18.0507
microcosm	MIMAT0000677	mmu-miR-7a-5p	Crhbp	12919	ENSMUSG00000021680	18.0439
microcosm	MIMAT0000677	mmu-miR-7a-5p	Ube2cbp	70348	ENSMUSG00000032415	18.0221
microcosm	MIMAT0000677	mmu-miR-7a-5p	Phyhd1	227696	ENSMUSG00000079484	18.0016
microcosm	MIMAT0000677	mmu-miR-7a-5p	Fryl		ENSMUSG00000090491	17.9879
microcosm	MIMAT0000677	mmu-miR-7a-5p	XR_033455.1			17.9879
microcosm	MIMAT0000677	mmu-miR-7a-5p	Gli3	14634	ENSMUSG00000021318	17.9879
microcosm	MIMAT0000677	mmu-miR-7a-5p	Fryl	72313	ENSMUSG00000070733	17.9879
microcosm	MIMAT0000677	mmu-miR-7a-5p	Pih1d1	68845	ENSMUSG00000003423	17.9879
microcosm	MIMAT0000677	mmu-miR-7a-5p	Nme3	79059	ENSMUSG00000073435	17.9879
microcosm	MIMAT0000677	mmu-miR-7a-5p	Zyg11a	230590	ENSMUSG00000034645	17.9879
microcosm	MIMAT0000677	mmu-miR-7a-5p	1700037C18Rik	73261	ENSMUSG00000005983	17.9761
microcosm	MIMAT0000677	mmu-miR-7a-5p	Nlrx1	270151	ENSMUSG00000032109	17.9639
microcosm	MIMAT0000677	mmu-miR-7a-5p	Ccdc74a	72315	ENSMUSG00000041617	17.9518
microcosm	MIMAT0000677	mmu-miR-7a-5p	Azgp1	12007	ENSMUSG00000037053	17.9077
microcosm	MIMAT0000677	mmu-miR-7a-5p	Bdkrb2	12062	ENSMUSG00000021070	17.9038
microcosm	MIMAT0000677	mmu-miR-7a-5p	Dhx37	208144	ENSMUSG00000029480	17.8792
microcosm	MIMAT0000677	mmu-miR-7a-5p	Dmrt2	226049	ENSMUSG00000048138	17.8748
microcosm	MIMAT0000677	mmu-miR-7a-5p	2900055J20Rik		ENSMUSG00000071860	17.8748
microcosm	MIMAT0000677	mmu-miR-7a-5p	Loxhd1	240411	ENSMUSG00000032818	17.8748
microcosm	MIMAT0000677	mmu-miR-7a-5p	Brca1	12189	ENSMUSG00000017146	17.8748
microcosm	MIMAT0000677	mmu-miR-7a-5p	Carkd	69225	ENSMUSG00000031505	17.8748
microcosm	MIMAT0000677	mmu-miR-7a-5p	Myo15b		ENSMUSG00000034427	17.8748
microcosm	MIMAT0000677	mmu-miR-7a-5p	Dmrt2	226049	ENSMUSG00000048138	17.8748
microcosm	MIMAT0000677	mmu-miR-7a-5p	Gtf2b	229906	ENSMUSG00000028271	17.8748
microcosm	MIMAT0000677	mmu-miR-7a-5p	Bpifa1	18843	ENSMUSG00000027483	17.8748
microcosm	MIMAT0000677	mmu-miR-7a-5p	Eapp	66266	ENSMUSG00000054302	17.8748
microcosm	MIMAT0000677	mmu-miR-7a-5p	Ipo11	76582	ENSMUSG00000042590	17.8338
microcosm	MIMAT0000677	mmu-miR-7a-5p	2210011C24Rik	70134	ENSMUSG00000074217	17.8229
microcosm	MIMAT0000677	mmu-miR-7a-5p	Gm12222		ENSMUSG00000060068	17.8229
microcosm	MIMAT0000677	mmu-miR-7a-5p	TRAV7D-6			17.8229
microcosm	MIMAT0000677	mmu-miR-7a-5p	TRAV7-6			17.8229
microcosm	MIMAT0000677	mmu-miR-7a-5p	Ipo11	76582	ENSMUSG00000042590	17.8219
microcosm	MIMAT0000677	mmu-miR-7a-5p	Samd10	229011	ENSMUSG00000038605	17.8106
microcosm	MIMAT0000677	mmu-miR-7a-5p	Gfral	404194	ENSMUSG00000059383	17.7963
microcosm	MIMAT0000677	mmu-miR-7a-5p	Relb	19698	ENSMUSG00000002983	17.79
microcosm	MIMAT0000677	mmu-miR-7a-5p	Ovgp1	12659	ENSMUSG00000074340	17.79
microcosm	MIMAT0000677	mmu-miR-7a-5p	Pan2	103135	ENSMUSG00000005682	17.7862
microcosm	MIMAT0000677	mmu-miR-7a-5p	Nr2c1	22025	ENSMUSG00000005897	17.778
microcosm	MIMAT0000677	mmu-miR-7a-5p	Nr1h2	22260	ENSMUSG00000060601	17.7628
microcosm	MIMAT0000677	mmu-miR-7a-5p	Tet3	194388	ENSMUSG00000034832	17.7616
microcosm	MIMAT0000677	mmu-miR-7a-5p	Defb42	619548	ENSMUSG00000054763	17.7616
microcosm	MIMAT0000677	mmu-miR-7a-5p	Gkap1	56278	ENSMUSG00000021552	17.7616
microcosm	MIMAT0000677	mmu-miR-7a-5p	Reg1	19692	ENSMUSG00000059654	17.7616
microcosm	MIMAT0000677	mmu-miR-7a-5p	Wdr20b	70948	ENSMUSG00000035560	17.7616
microcosm	MIMAT0000677	mmu-miR-7a-5p	Mki67ip	67949	ENSMUSG00000026377	17.744
microcosm	MIMAT0000677	mmu-miR-7a-5p	Fig4	103199	ENSMUSG00000038417	17.7351
microcosm	MIMAT0000677	mmu-miR-7a-5p	Cacna1a	12286	ENSMUSG00000034656	17.7303
microcosm	MIMAT0000677	mmu-miR-7a-5p	Shpk	74637	ENSMUSG00000005951	17.7167
microcosm	MIMAT0000677	mmu-miR-7a-5p	Aldh1a7	26358	ENSMUSG00000024747	17.7163
microcosm	MIMAT0000677	mmu-miR-7a-5p	Snca	20617	ENSMUSG00000025889	17.7124
microcosm	MIMAT0000677	mmu-miR-7a-5p	Ccdc80	67896	ENSMUSG00000022665	17.6762
microcosm	MIMAT0000677	mmu-miR-7a-5p	Cav3	12391	ENSMUSG00000062694	17.6693
microcosm	MIMAT0000677	mmu-miR-7a-5p	Pde9a	18585	ENSMUSG00000041119	17.6546
microcosm	MIMAT0000677	mmu-miR-7a-5p	Fhl5	57756	ENSMUSG00000028259	17.6485
microcosm	MIMAT0000677	mmu-miR-7a-5p	Apoc2	11813	ENSMUSG00000002992	17.6485
microcosm	MIMAT0000677	mmu-miR-7a-5p	Dnmt3l	54427	ENSMUSG00000000730	17.6485
microcosm	MIMAT0000677	mmu-miR-7a-5p	1700057G04Rik	78459	ENSMUSG00000074139	17.6485
microcosm	MIMAT0000677	mmu-miR-7a-5p	Gcnt1	14537	ENSMUSG00000038843	17.6485
microcosm	MIMAT0000677	mmu-miR-7a-5p	Nmi	64685	ENSMUSG00000026946	17.6485
microcosm	MIMAT0000677	mmu-miR-7a-5p	Gm10161		ENSMUSG00000069196	17.6414
microcosm	MIMAT0000677	mmu-miR-7a-5p	Rassf7	66985	ENSMUSG00000038618	17.6407
microcosm	MIMAT0000677	mmu-miR-7a-5p	Cideb	12684	ENSMUSG00000022219	17.6353
microcosm	MIMAT0000677	mmu-miR-7a-5p	Chst1	76969	ENSMUSG00000027221	17.6238
microcosm	MIMAT0000677	mmu-miR-7a-5p	Myo18a	360013	ENSMUSG00000000631	17.6238
microcosm	MIMAT0000677	mmu-miR-7a-5p	Olfr161	258859	ENSMUSG00000051003	17.6235
microcosm	MIMAT0000677	mmu-miR-7a-5p	5730507A09Rik			17.619
microcosm	MIMAT0000677	mmu-miR-7a-5p	BC056474	100040052	ENSMUSG00000059355	17.6156
microcosm	MIMAT0000677	mmu-miR-7a-5p	BC056474	619941	ENSMUSG00000059355	17.6156
microcosm	MIMAT0000677	mmu-miR-7a-5p	BC056474	414077	ENSMUSG00000059355	17.6156
microcosm	MIMAT0000677	mmu-miR-7a-5p	Map7d1	245877	ENSMUSG00000028849	17.6139
microcosm	MIMAT0000677	mmu-miR-7a-5p	C87436	232196	ENSMUSG00000046679	17.6056
microcosm	MIMAT0000677	mmu-miR-7a-5p	Pax6	18508	ENSMUSG00000027168	17.5971
microcosm	MIMAT0000677	mmu-miR-7a-5p	Cflar	12633	ENSMUSG00000026031	17.5921
microcosm	MIMAT0000677	mmu-miR-7a-5p	Pias1	56469	ENSMUSG00000032405	17.5801
microcosm	MIMAT0000677	mmu-miR-7a-5p	1700003H04Rik		ENSMUSG00000039174	17.5769
microcosm	MIMAT0000677	mmu-miR-7a-5p	Lrrc16a	68732	ENSMUSG00000021338	17.5755
microcosm	MIMAT0000677	mmu-miR-7a-5p	Hjurp	381280	ENSMUSG00000044783	17.574
microcosm	MIMAT0000677	mmu-miR-7a-5p	Hjurp	212427	ENSMUSG00000044783	17.574
microcosm	MIMAT0000677	mmu-miR-7a-5p	Adh6a	69117	ENSMUSG00000053054	17.5739
microcosm	MIMAT0000677	mmu-miR-7a-5p	Tas2r118	387347	ENSMUSG00000043865	17.5721
microcosm	MIMAT0000677	mmu-miR-7a-5p	Sepp1		ENSMUSG00000064373	17.5667
microcosm	MIMAT0000677	mmu-miR-7a-5p	Aars2	224805	ENSMUSG00000023938	17.5645
microcosm	MIMAT0000677	mmu-miR-7a-5p	Msh3	17686	ENSMUSG00000014850	17.5612
microcosm	MIMAT0000677	mmu-miR-7a-5p	1810073N04Rik			17.5471
microcosm	MIMAT0000677	mmu-miR-7a-5p	Pias1	56469	ENSMUSG00000032405	17.5383
microcosm	MIMAT0000677	mmu-miR-7a-5p	Fam170a	225497	ENSMUSG00000035420	17.5354
microcosm	MIMAT0000677	mmu-miR-7a-5p	Asz1	74068	ENSMUSG00000010796	17.5354
microcosm	MIMAT0000677	mmu-miR-7a-5p	Rbmxl1	19656	ENSMUSG00000037070	17.5354
microcosm	MIMAT0000677	mmu-miR-7a-5p	Zdhhc12	66220	ENSMUSG00000015335	17.5288
microcosm	MIMAT0000677	mmu-miR-7a-5p	Asxl1	228790	ENSMUSG00000042548	17.5242
microcosm	MIMAT0000677	mmu-miR-7a-5p	Rpsa-ps10		ENSMUSG00000047676	17.5193
microcosm	MIMAT0000677	mmu-miR-7a-5p	Olfr1504	258627	ENSMUSG00000059105	17.5104
microcosm	MIMAT0000677	mmu-miR-7a-5p	Rfx3	19726	ENSMUSG00000040929	17.5026
microcosm	MIMAT0000677	mmu-miR-7a-5p	Slc38a10	72055	ENSMUSG00000061306	17.5017
microcosm	MIMAT0000677	mmu-miR-7a-5p	Slc38a10	72055	ENSMUSG00000061306	17.4829
microcosm	MIMAT0000677	mmu-miR-7a-5p	Ptpre	19267	ENSMUSG00000041836	17.482
microcosm	MIMAT0000677	mmu-miR-7a-5p	Zdhhc6	66980	ENSMUSG00000024982	17.4745
miranda	MIMAT0000677	mmu-miR-7a-5p	Emr4	52614	ENSMUSG00000032915	-1.3264
miranda	MIMAT0000677	mmu-miR-7a-5p	Pax6	18508	ENSMUSG00000027168	-1.3243
miranda	MIMAT0000677	mmu-miR-7a-5p	Pax6	18508	ENSMUSG00000027168	-1.3196
miranda	MIMAT0000677	mmu-miR-7a-5p	4930432K09Rik	73779	ENSMUSG00000002240	-1.3116
miranda	MIMAT0000677	mmu-miR-7a-5p	Arid4a	238247	ENSMUSG00000048118	-1.3078
miranda	MIMAT0000677	mmu-miR-7a-5p	Boc	117606	ENSMUSG00000022687	-1.3065
miranda	MIMAT0000677	mmu-miR-7a-5p	Taf2	319944	ENSMUSG00000037343	-1.303
miranda	MIMAT0000677	mmu-miR-7a-5p	Arf4	11843	ENSMUSG00000021877	-1.3022
miranda	MIMAT0000677	mmu-miR-7a-5p	Ktn1	16709	ENSMUSG00000021843	-1.296
miranda	MIMAT0000677	mmu-miR-7a-5p	Ubtfl1	546118	ENSMUSG00000074502	-1.2895
miranda	MIMAT0000677	mmu-miR-7a-5p	Tiam2	24001	ENSMUSG00000023800	-1.2886
miranda	MIMAT0000677	mmu-miR-7a-5p	Pus7l	78895	ENSMUSG00000033356	-1.2834
miranda	MIMAT0000677	mmu-miR-7a-5p	Ost4	67695	ENSMUSG00000038803	-1.2829
miranda	MIMAT0000677	mmu-miR-7a-5p	Bcorl1	320376	ENSMUSG00000036959	-1.2794
miranda	MIMAT0000677	mmu-miR-7a-5p	Tmem230	70612	ENSMUSG00000027341	-1.2751
miranda	MIMAT0000677	mmu-miR-7a-5p	Fbxw2	30050	ENSMUSG00000035949	-1.2744
miranda	MIMAT0000677	mmu-miR-7a-5p	Zfp248	72720	ENSMUSG00000030145	-1.2726
miranda	MIMAT0000677	mmu-miR-7a-5p	Ghitm	66092	ENSMUSG00000041028	-1.2721
miranda	MIMAT0000677	mmu-miR-7a-5p	Zic3	22773	ENSMUSG00000067860	-1.2707
miranda	MIMAT0000677	mmu-miR-7a-5p	Snca	20617	ENSMUSG00000025889	-1.2653
miranda	MIMAT0000677	mmu-miR-7a-5p	Bre	107976	ENSMUSG00000052139	-1.2541
miranda	MIMAT0000677	mmu-miR-7a-5p	Vdac1	22333	ENSMUSG00000020402	-1.2521
miranda	MIMAT0000677	mmu-miR-7a-5p	Enah	13800	ENSMUSG00000022995	-1.2519
miranda	MIMAT0000677	mmu-miR-7a-5p	Ankrd12	106585	ENSMUSG00000034647	-1.2457
miranda	MIMAT0000677	mmu-miR-7a-5p	Gm4858	229571	ENSMUSG00000096879	-1.2393
miranda	MIMAT0000677	mmu-miR-7a-5p	U2surp	67958	ENSMUSG00000032407	-1.2352
miranda	MIMAT0000677	mmu-miR-7a-5p	Megf9	230316	ENSMUSG00000039270	-1.2348
miranda	MIMAT0000677	mmu-miR-7a-5p	Klf4	16600	ENSMUSG00000003032	-1.2339
miranda	MIMAT0000677	mmu-miR-7a-5p	Chsy3	78923	ENSMUSG00000058152	-1.2333
miranda	MIMAT0000677	mmu-miR-7a-5p	Snora15	100113364		-1.2297
miranda	MIMAT0000677	mmu-miR-7a-5p	Trmt13	229780	ENSMUSG00000033439	-1.2228
miranda	MIMAT0000677	mmu-miR-7a-5p	Ckap4	216197	ENSMUSG00000046841	-1.2204
miranda	MIMAT0000677	mmu-miR-7a-5p	Fbln7	70370	ENSMUSG00000027386	-1.2195
miranda	MIMAT0000677	mmu-miR-7a-5p	Cat	12359	ENSMUSG00000027187	-1.219
miranda	MIMAT0000677	mmu-miR-7a-5p	Ceacam20	71601	ENSMUSG00000070777	-1.2159
miranda	MIMAT0000677	mmu-miR-7a-5p	Aldh8a1	237320	ENSMUSG00000037542	-1.2155
miranda	MIMAT0000677	mmu-miR-7a-5p	Dlg2	23859	ENSMUSG00000052572	-1.2142
miranda	MIMAT0000677	mmu-miR-7a-5p	D830026I12Rik	319682		-1.2109
miranda	MIMAT0000677	mmu-miR-7a-5p	Gjc1	14615	ENSMUSG00000034520	-1.2095
miranda	MIMAT0000677	mmu-miR-7a-5p	Ccdc144b	241943	ENSMUSG00000047696	-1.209
miranda	MIMAT0000677	mmu-miR-7a-5p	9230112D13Rik	78243	ENSMUSG00000021797	-1.2047
miranda	MIMAT0000677	mmu-miR-7a-5p	Pdcd6	18570	ENSMUSG00000021576	-1.2035
miranda	MIMAT0000677	mmu-miR-7a-5p	4930479M11Rik	74927		-1.2029
miranda	MIMAT0000677	mmu-miR-7a-5p	9030624G23Rik	66808	ENSMUSG00000073158	-1.2023
miranda	MIMAT0000677	mmu-miR-7a-5p	Serpinb2	18788	ENSMUSG00000062345	-1.2022
miranda	MIMAT0000677	mmu-miR-7a-5p	Eed	13626	ENSMUSG00000030619	-1.2021
miranda	MIMAT0000677	mmu-miR-7a-5p	E330021D16Rik	243676		-1.201
miranda	MIMAT0000677	mmu-miR-7a-5p	Smpdl3a	57319	ENSMUSG00000019872	-1.2009
miranda	MIMAT0000677	mmu-miR-7a-5p	Grik1	14805	ENSMUSG00000022935	-1.1995
miranda	MIMAT0000677	mmu-miR-7a-5p	Mapkap1	227743	ENSMUSG00000038696	-1.1979
miranda	MIMAT0000677	mmu-miR-7a-5p	Calr	12317	ENSMUSG00000003814	-1.1979
miranda	MIMAT0000677	mmu-miR-7a-5p	Cnot2	72068	ENSMUSG00000020166	-1.1954
miranda	MIMAT0000677	mmu-miR-7a-5p	Mks1	380718	ENSMUSG00000034121	-1.1931
miranda	MIMAT0000677	mmu-miR-7a-5p	Krt33a	71888	ENSMUSG00000035592	-1.193
miranda	MIMAT0000677	mmu-miR-7a-5p	Spata2	263876	ENSMUSG00000047030	-1.1918
miranda	MIMAT0000677	mmu-miR-7a-5p	Pan2	103135	ENSMUSG00000005682	-1.1912
miranda	MIMAT0000677	mmu-miR-7a-5p	Vcan	13003	ENSMUSG00000021614	-1.191
miranda	MIMAT0000677	mmu-miR-7a-5p	Sec31a	69162	ENSMUSG00000035325	-1.1906
miranda	MIMAT0000677	mmu-miR-7a-5p	Dhx37	208144	ENSMUSG00000029480	-1.1883
miranda	MIMAT0000677	mmu-miR-7a-5p	2810408M09Rik	381406	ENSMUSG00000039725	-1.1879
miranda	MIMAT0000677	mmu-miR-7a-5p	Atg3	67841	ENSMUSG00000022663	-1.1841
miranda	MIMAT0000677	mmu-miR-7a-5p	Hdac8	70315	ENSMUSG00000067567	-1.1694
miranda	MIMAT0000677	mmu-miR-7a-5p	Col2a1	12824	ENSMUSG00000022483	-1.1691
miranda	MIMAT0000677	mmu-miR-7a-5p	2410018L13Rik	69732		-1.169
miranda	MIMAT0000677	mmu-miR-7a-5p	Pak1	18479	ENSMUSG00000030774	-1.1685
miranda	MIMAT0000677	mmu-miR-7a-5p	Hcn1	15165	ENSMUSG00000021730	-1.1673
miranda	MIMAT0000677	mmu-miR-7a-5p	Actb	11461	ENSMUSG00000029580	-1.1661
miranda	MIMAT0000677	mmu-miR-7a-5p	9430020K01Rik	240185	ENSMUSG00000033960	-1.1647
miranda	MIMAT0000677	mmu-miR-7a-5p	Parp1	11545	ENSMUSG00000026496	-1.1604
miranda	MIMAT0000677	mmu-miR-7a-5p	Ggta1	14594	ENSMUSG00000035778	-1.1602
miranda	MIMAT0000677	mmu-miR-7a-5p	Atg4a	666468	ENSMUSG00000079418	-1.1602
miranda	MIMAT0000677	mmu-miR-7a-5p	Fam184a	75906	ENSMUSG00000019856	-1.1591
miranda	MIMAT0000677	mmu-miR-7a-5p	Zc4h2	245522	ENSMUSG00000035062	-1.1587
miranda	MIMAT0000677	mmu-miR-7a-5p	Kdm3b	277250	ENSMUSG00000038773	-1.1585
miranda	MIMAT0000677	mmu-miR-7a-5p	Tmcc1	330401	ENSMUSG00000030126	-1.1575
miranda	MIMAT0000677	mmu-miR-7a-5p	Rnf141	67150	ENSMUSG00000030788	-1.1572
miranda	MIMAT0000677	mmu-miR-7a-5p	Zbtb49	75079	ENSMUSG00000029127	-1.1572
miranda	MIMAT0000677	mmu-miR-7a-5p	Rfx6	320995	ENSMUSG00000019900	-1.1555
miranda	MIMAT0000677	mmu-miR-7a-5p	1700020I14Rik	66602		-1.1541
miranda	MIMAT0000677	mmu-miR-7a-5p	Ccdc23	69216	ENSMUSG00000028643	-1.1532
miranda	MIMAT0000677	mmu-miR-7a-5p	Hnrnpa1	15382	ENSMUSG00000046434	-1.152
miranda	MIMAT0000677	mmu-miR-7a-5p	Dcstamp	75766	ENSMUSG00000022303	-1.1516
miranda	MIMAT0000677	mmu-miR-7a-5p	Zfp53	24132	ENSMUSG00000057409	-1.1503
miranda	MIMAT0000677	mmu-miR-7a-5p	Abhd17b	226016	ENSMUSG00000047368	-1.1502
miranda	MIMAT0000677	mmu-miR-7a-5p	Crhbp	12919	ENSMUSG00000021680	-1.1484
miranda	MIMAT0000677	mmu-miR-7a-5p	Itsn2	20403	ENSMUSG00000020640	-1.1482
miranda	MIMAT0000677	mmu-miR-7a-5p	Nrep	27528	ENSMUSG00000042834	-1.1478
miranda	MIMAT0000677	mmu-miR-7a-5p	Rbm26	74213	ENSMUSG00000022119	-1.1473
miranda	MIMAT0000677	mmu-miR-7a-5p	Hsph1	15505	ENSMUSG00000029657	-1.1468
miranda	MIMAT0000677	mmu-miR-7a-5p	Gm16039	100036521		-1.1456
miranda	MIMAT0000677	mmu-miR-7a-5p	Ccnt2	72949	ENSMUSG00000026349	-1.1453
miranda	MIMAT0000677	mmu-miR-7a-5p	2410018L13Rik	69732		-1.14
miranda	MIMAT0000677	mmu-miR-7a-5p	Gabpb1	14391	ENSMUSG00000027361	-1.1389
miranda	MIMAT0000677	mmu-miR-7a-5p	C030013G03Rik	77414		-1.1387
miranda	MIMAT0000677	mmu-miR-7a-5p	Sprr2f	20760	ENSMUSG00000050635	-1.1376
miranda	MIMAT0000677	mmu-miR-7a-5p	1700025F22Rik	69416	ENSMUSG00000024728	-1.1366
miranda	MIMAT0000677	mmu-miR-7a-5p	1700020I14Rik	66602		-1.1333
miranda	MIMAT0000677	mmu-miR-7a-5p	Eif4g3	230861	ENSMUSG00000028760	-1.1324
miranda	MIMAT0000677	mmu-miR-7a-5p	Dgki	320127	ENSMUSG00000038665	-1.1309
miranda	MIMAT0000677	mmu-miR-7a-5p	4833417C18Rik	73906		-1.1298
miranda	MIMAT0000677	mmu-miR-7a-5p	Zbtb1	268564	ENSMUSG00000033454	-1.1286
miranda	MIMAT0000677	mmu-miR-7a-5p	Rb1	19645	ENSMUSG00000022105	-1.1279
miranda	MIMAT0000677	mmu-miR-7a-5p	Slc12a1	20495	ENSMUSG00000027202	-1.1255
miranda	MIMAT0000677	mmu-miR-7a-5p	Ambra1	228361	ENSMUSG00000040506	-1.1229
miranda	MIMAT0000677	mmu-miR-7a-5p	Mplkip	66308	ENSMUSG00000012429	-1.1229
miranda	MIMAT0000677	mmu-miR-7a-5p	Fbxo10	269529	ENSMUSG00000048232	-1.1226
miranda	MIMAT0000677	mmu-miR-7a-5p	Arid3c	550619	ENSMUSG00000066224	-1.1223
miranda	MIMAT0000677	mmu-miR-7a-5p	Hs3st5	319415	ENSMUSG00000044499	-1.1219
miranda	MIMAT0000677	mmu-miR-7a-5p	Slc39a1	30791	ENSMUSG00000052310	-1.1183
miranda	MIMAT0000677	mmu-miR-7a-5p	Gm9222	668525		-1.118
miranda	MIMAT0000677	mmu-miR-7a-5p	Dnmt3a	13435	ENSMUSG00000020661	-1.1129
miranda	MIMAT0000677	mmu-miR-7a-5p	1700020I14Rik	66602		-1.1123
miranda	MIMAT0000677	mmu-miR-7a-5p	Stau2	29819	ENSMUSG00000025920	-1.1095
miranda	MIMAT0000677	mmu-miR-7a-5p	Cnppd1	69171	ENSMUSG00000033159	-1.1059
miranda	MIMAT0000677	mmu-miR-7a-5p	Clca3	23844	ENSMUSG00000028255	-1.1051
miranda	MIMAT0000677	mmu-miR-7a-5p	Hbp1	73389	ENSMUSG00000002996	-1.0996
miranda	MIMAT0000677	mmu-miR-7a-5p	D230004N17Rik	320833		-1.0995
miranda	MIMAT0000677	mmu-miR-7a-5p	Cnn3	71994	ENSMUSG00000053931	-1.0991
miranda	MIMAT0000677	mmu-miR-7a-5p	Med20	56771	ENSMUSG00000092558	-1.0984
miranda	MIMAT0000677	mmu-miR-7a-5p	Sprr2k	20765	ENSMUSG00000054215	-1.0961
miranda	MIMAT0000677	mmu-miR-7a-5p	Lcp1	18826	ENSMUSG00000021998	-1.0961
miranda	MIMAT0000677	mmu-miR-7a-5p	Zdhhc16	74168	ENSMUSG00000025157	-1.0953
miranda	MIMAT0000677	mmu-miR-7a-5p	Gkn1	66283	ENSMUSG00000030050	-1.094
miranda	MIMAT0000677	mmu-miR-7a-5p	Pdc	20028	ENSMUSG00000006007	-1.0935
miranda	MIMAT0000677	mmu-miR-7a-5p	Zfp85-rs1	22746	ENSMUSG00000058331	-1.0913
miranda	MIMAT0000677	mmu-miR-7a-5p	Syt1	20979	ENSMUSG00000035864	-1.0911
miranda	MIMAT0000677	mmu-miR-7a-5p	Ccdc50	67501	ENSMUSG00000038127	-1.0907
miranda	MIMAT0000677	mmu-miR-7a-5p	Slc26a2	13521	ENSMUSG00000034320	-1.0901
miranda	MIMAT0000677	mmu-miR-7a-5p	Rab7l1	226422	ENSMUSG00000026433	-1.0887
miranda	MIMAT0000677	mmu-miR-7a-5p	1700020I14Rik	66602		-1.0855
miranda	MIMAT0000677	mmu-miR-7a-5p	2310047D07Rik	69657		-1.0839
miranda	MIMAT0000677	mmu-miR-7a-5p	Gja1	14609	ENSMUSG00000050953	-1.0833
miranda	MIMAT0000677	mmu-miR-7a-5p	Ccbl2	229905	ENSMUSG00000040213	-1.0831
miranda	MIMAT0000677	mmu-miR-7a-5p	Spop	20747	ENSMUSG00000057522	-1.083
miranda	MIMAT0000677	mmu-miR-7a-5p	Chchd7	66433	ENSMUSG00000042198	-1.0816
miranda	MIMAT0000677	mmu-miR-7a-5p	Tex261	21766	ENSMUSG00000014748	-1.08
miranda	MIMAT0000677	mmu-miR-7a-5p	Clasp2	76499	ENSMUSG00000033392	-1.0797
miranda	MIMAT0000677	mmu-miR-7a-5p	Pole4	66979	ENSMUSG00000030042	-1.0794
miranda	MIMAT0000677	mmu-miR-7a-5p	Mks1	380718	ENSMUSG00000034121	-1.0793
miranda	MIMAT0000677	mmu-miR-7a-5p	Oxr1	170719	ENSMUSG00000022307	-1.0789
miranda	MIMAT0000677	mmu-miR-7a-5p	Ugp2	216558	ENSMUSG00000001891	-1.0768
miranda	MIMAT0000677	mmu-miR-7a-5p	Cct4	12464	ENSMUSG00000007739	-1.0758
miranda	MIMAT0000677	mmu-miR-7a-5p	Cox15	226139	ENSMUSG00000040018	-1.0756
miranda	MIMAT0000677	mmu-miR-7a-5p	Spink10	328971	ENSMUSG00000044176	-1.0745
miranda	MIMAT0000677	mmu-miR-7a-5p	1810055G02Rik	72056	ENSMUSG00000035372	-1.0734
miranda	MIMAT0000677	mmu-miR-7a-5p	Gm12888	545677	ENSMUSG00000073764	-1.0721
miranda	MIMAT0000677	mmu-miR-7a-5p	Dnajc19	67713	ENSMUSG00000027679	-1.0709
miranda	MIMAT0000677	mmu-miR-7a-5p	Mitf	17342	ENSMUSG00000035158	-1.0706
miranda	MIMAT0000677	mmu-miR-7a-5p	Usp48	170707	ENSMUSG00000043411	-1.0692
miranda	MIMAT0000677	mmu-miR-7a-5p	Mn1	433938	ENSMUSG00000070576	-1.0684
miranda	MIMAT0000677	mmu-miR-7a-5p	Slc4a4	54403	ENSMUSG00000060961	-1.0638
miranda	MIMAT0000677	mmu-miR-7a-5p	Ggnbp2	217039	ENSMUSG00000020530	-1.0613
miranda	MIMAT0000677	mmu-miR-7a-5p	Ndufb5	66046	ENSMUSG00000027673	-1.0608
miranda	MIMAT0000677	mmu-miR-7a-5p	Zfand1	66361	ENSMUSG00000039795	-1.0603
miranda	MIMAT0000677	mmu-miR-7a-5p	Slc17a1	20504	ENSMUSG00000021335	-1.0574
miranda	MIMAT0000677	mmu-miR-7a-5p	Gpr12	14738	ENSMUSG00000041468	-1.0573
miranda	MIMAT0000677	mmu-miR-7a-5p	Gli3	14634	ENSMUSG00000021318	-1.0562
miranda	MIMAT0000677	mmu-miR-7a-5p	Ctsk	13038	ENSMUSG00000028111	-1.0545
miranda	MIMAT0000677	mmu-miR-7a-5p	Wasf3	245880	ENSMUSG00000029636	-1.0541
miranda	MIMAT0000677	mmu-miR-7a-5p	Cp	12870	ENSMUSG00000003617	-1.0538
miranda	MIMAT0000677	mmu-miR-7a-5p	Zfp93	22755	ENSMUSG00000055305	-1.0495
miranda	MIMAT0000677	mmu-miR-7a-5p	A330032B11Rik	319931		-1.0494
miranda	MIMAT0000677	mmu-miR-7a-5p	Zfp287	170740	ENSMUSG00000005267	-1.0488
miranda	MIMAT0000677	mmu-miR-7a-5p	Atp6v1e1	11973	ENSMUSG00000019210	-1.0488
miranda	MIMAT0000677	mmu-miR-7a-5p	Arcn1	213827	ENSMUSG00000032096	-1.0487
miranda	MIMAT0000677	mmu-miR-7a-5p	Mtm1	17772	ENSMUSG00000031337	-1.0474
miranda	MIMAT0000677	mmu-miR-7a-5p	Rspry1	67610	ENSMUSG00000050079	-1.0461
miranda	MIMAT0000677	mmu-miR-7a-5p	Zfp697	242109	ENSMUSG00000050064	-1.046
miranda	MIMAT0000677	mmu-miR-7a-5p	4430402I18Rik	381218	ENSMUSG00000064202	-1.041
miranda	MIMAT0000677	mmu-miR-7a-5p	Ptpre	19267	ENSMUSG00000041836	-1.0406
miranda	MIMAT0000677	mmu-miR-7a-5p	Dazl	13164	ENSMUSG00000010592	-1.0396
miranda	MIMAT0000677	mmu-miR-7a-5p	Zc3h4	330474	ENSMUSG00000059273	-1.0396
miranda	MIMAT0000677	mmu-miR-7a-5p	Zfp446	269870	ENSMUSG00000033961	-1.039
miranda	MIMAT0000677	mmu-miR-7a-5p	4921529L05Rik	320178		-1.0388
miranda	MIMAT0000677	mmu-miR-7a-5p	Gnb1l	13972	ENSMUSG00000000884	-1.0381
miranda	MIMAT0000677	mmu-miR-7a-5p	5330439B14Rik	321015		-1.037
miranda	MIMAT0000677	mmu-miR-7a-5p	St8sia4	20452	ENSMUSG00000040710	-1.0363
miranda	MIMAT0000677	mmu-miR-7a-5p	Nlrx1	270151	ENSMUSG00000032109	-1.0358
miranda	MIMAT0000677	mmu-miR-7a-5p	Vmn1r71	252910	ENSMUSG00000059206	-1.0351
miranda	MIMAT0000677	mmu-miR-7a-5p	Zc3hav1	78781	ENSMUSG00000029826	-1.0347
miranda	MIMAT0000677	mmu-miR-7a-5p	Hdlbp	110611	ENSMUSG00000034088	-1.0316
miranda	MIMAT0000677	mmu-miR-7a-5p	Zfand1	66361	ENSMUSG00000039795	-1.0314
miranda	MIMAT0000677	mmu-miR-7a-5p	Casp14	12365	ENSMUSG00000005355	-1.0312
miranda	MIMAT0000677	mmu-miR-7a-5p	Bloc1s4	117197	ENSMUSG00000060708	-1.0294
miranda	MIMAT0000677	mmu-miR-7a-5p	Cldn23	71908	ENSMUSG00000055976	-1.0292
miranda	MIMAT0000677	mmu-miR-7a-5p	H2-Ob	15002	ENSMUSG00000041538	-1.0284
miranda	MIMAT0000677	mmu-miR-7a-5p	Cxcl2	20310	ENSMUSG00000058427	-1.0283
miranda	MIMAT0000677	mmu-miR-7a-5p	Arhgap21	71435	ENSMUSG00000036591	-1.0268
miranda	MIMAT0000677	mmu-miR-7a-5p	Tcp10c	100041352	ENSMUSG00000052469	-1.0257
miranda	MIMAT0000677	mmu-miR-7a-5p	A530064D06Rik	328830	ENSMUSG00000043939	-1.0253
miranda	MIMAT0000677	mmu-miR-7a-5p	1110008F13Rik	67388	ENSMUSG00000027637	-1.0238
miranda	MIMAT0000677	mmu-miR-7a-5p	Neb	17996	ENSMUSG00000026950	-1.0228
miranda	MIMAT0000677	mmu-miR-7a-5p	Acat1	110446	ENSMUSG00000032047	-1.0225
miranda	MIMAT0000677	mmu-miR-7a-5p	2900053O20Rik	72971		-1.0214
miranda	MIMAT0000677	mmu-miR-7a-5p	Lamc2	16782	ENSMUSG00000026479	-1.0206
miranda	MIMAT0000677	mmu-miR-7a-5p	Nxpe2	78252	ENSMUSG00000032028	-1.0202
miranda	MIMAT0000677	mmu-miR-7a-5p	Vrtn	432677	ENSMUSG00000071235	-1.0193
miranda	MIMAT0000677	mmu-miR-7a-5p	Mad2l1	56150	ENSMUSG00000029910	-1.0171
miranda	MIMAT0000677	mmu-miR-7a-5p	Dcaf8	98193	ENSMUSG00000026554	-1.0169
miranda	MIMAT0000677	mmu-miR-7a-5p	Ctnnd2	18163	ENSMUSG00000022240	-1.0151
miranda	MIMAT0000677	mmu-miR-7a-5p	Gm6084	619517	ENSMUSG00000073396	-1.0146
miranda	MIMAT0000677	mmu-miR-7a-5p	A530001N23Rik	328265		-1.0121
miranda	MIMAT0000677	mmu-miR-7a-5p	Mlh3	217716	ENSMUSG00000021245	-1.0118
miranda	MIMAT0000677	mmu-miR-7a-5p	Zdhhc5	228136	ENSMUSG00000034075	-1.0114
miranda	MIMAT0000677	mmu-miR-7a-5p	Ubr3	68795	ENSMUSG00000044308	-1.0111
miranda	MIMAT0000677	mmu-miR-7a-5p	Matr3	17184	ENSMUSG00000037236	-1.0101
miranda	MIMAT0000677	mmu-miR-7a-5p	Tmem88b	320587	ENSMUSG00000073680	-1.01
miranda	MIMAT0000677	mmu-miR-7a-5p	Relb	19698	ENSMUSG00000002983	-1.0072
miranda	MIMAT0000677	mmu-miR-7a-5p	Ganab	14376	ENSMUSG00000071650	-1.0066
miranda	MIMAT0000677	mmu-miR-7a-5p	Sepp1	20363		-1.0056
miranda	MIMAT0000677	mmu-miR-7a-5p	Tusc1	69136	ENSMUSG00000054000	-1.0045
miranda	MIMAT0000677	mmu-miR-7a-5p	Tmeff2	56363	ENSMUSG00000026109	-1.0024
miranda	MIMAT0000677	mmu-miR-7a-5p	Tmem37	170706	ENSMUSG00000050777	-1.002
miranda	MIMAT0000677	mmu-miR-7a-5p	Lphn3	319387	ENSMUSG00000037605	-1.002
miranda	MIMAT0000677	mmu-miR-7a-5p	Otog	18419	ENSMUSG00000009487	-1.001
miranda	MIMAT0000677	mmu-miR-7a-5p	Hells	15201	ENSMUSG00000025001	-0.9979
miranda	MIMAT0000677	mmu-miR-7a-5p	Sprr2d	20758	ENSMUSG00000042212	-0.9976
miranda	MIMAT0000677	mmu-miR-7a-5p	Wdr47	99512	ENSMUSG00000040389	-0.9968
miranda	MIMAT0000677	mmu-miR-7a-5p	Atp10d	231287		-0.9947
miranda	MIMAT0000677	mmu-miR-7a-5p	Epdr1	105298	ENSMUSG00000002808	-0.9936
miranda	MIMAT0000677	mmu-miR-7a-5p	Ube2d2a	56550	ENSMUSG00000091896	-0.9923
miranda	MIMAT0000677	mmu-miR-7a-5p	Foxj2	60611	ENSMUSG00000003154	-0.9921
miranda	MIMAT0000677	mmu-miR-7a-5p	Rd3	74023	ENSMUSG00000049353	-0.9917
miranda	MIMAT0000677	mmu-miR-7a-5p	Gm10319	381806		-0.9915
miranda	MIMAT0000677	mmu-miR-7a-5p	8030451A03Rik	68103		-0.9913
miranda	MIMAT0000677	mmu-miR-7a-5p	Gm5784	544848		-0.9899
miranda	MIMAT0000677	mmu-miR-7a-5p	Prkcb	18751	ENSMUSG00000052889	-0.988
miranda	MIMAT0000677	mmu-miR-7a-5p	A830058I18Rik	319788		-0.9879
miranda	MIMAT0000677	mmu-miR-7a-5p	Pole4	66979	ENSMUSG00000030042	-0.9877
miranda	MIMAT0000677	mmu-miR-7a-5p	Krt27	16675	ENSMUSG00000017588	-0.9875
miranda	MIMAT0000677	mmu-miR-7a-5p	Trpc5	22067	ENSMUSG00000041710	-0.9862
miranda	MIMAT0000677	mmu-miR-7a-5p	Praf2	54637	ENSMUSG00000031149	-0.9858
miranda	MIMAT0000677	mmu-miR-7a-5p	Gm904	380845	ENSMUSG00000096641	-0.9857
miranda	MIMAT0000677	mmu-miR-7a-5p	Lama4	16775	ENSMUSG00000019846	-0.9839
miranda	MIMAT0000677	mmu-miR-7a-5p	Fig4	103199	ENSMUSG00000038417	-0.9826
miranda	MIMAT0000677	mmu-miR-7a-5p	Bpifa1	18843	ENSMUSG00000027483	-0.9808
miranda	MIMAT0000677	mmu-miR-7a-5p	Spef2	320277	ENSMUSG00000072663	-0.9798
miranda	MIMAT0000677	mmu-miR-7a-5p	Dtna	13527	ENSMUSG00000024302	-0.9788
miranda	MIMAT0000677	mmu-miR-7a-5p	Rpgr	19893	ENSMUSG00000031174	-0.9787
miranda	MIMAT0000677	mmu-miR-7a-5p	Kif16b	16558	ENSMUSG00000038844	-0.9779
miranda	MIMAT0000677	mmu-miR-7a-5p	Kif13a	16553	ENSMUSG00000021375	-0.9778
miranda	MIMAT0000677	mmu-miR-7a-5p	Lmna	16905	ENSMUSG00000028063	-0.977
miranda	MIMAT0000677	mmu-miR-7a-5p	Phf17	269424	ENSMUSG00000025764	-0.9759
miranda	MIMAT0000677	mmu-miR-7a-5p	Tnfaip3	21929	ENSMUSG00000019850	-0.9759
miranda	MIMAT0000677	mmu-miR-7a-5p	Itgav	16410	ENSMUSG00000027087	-0.9752
miranda	MIMAT0000677	mmu-miR-7a-5p	Slc46a3	71706	ENSMUSG00000029650	-0.9751
miranda	MIMAT0000677	mmu-miR-7a-5p	Gimap4	107526	ENSMUSG00000054435	-0.9747
miranda	MIMAT0000677	mmu-miR-7a-5p	Mios	252875	ENSMUSG00000042447	-0.9729
miranda	MIMAT0000677	mmu-miR-7a-5p	Slc39a2	214922	ENSMUSG00000072572	-0.9727
miranda	MIMAT0000677	mmu-miR-7a-5p	Shprh	268281	ENSMUSG00000090112	-0.9726
miranda	MIMAT0000677	mmu-miR-7a-5p	Mecom	14013	ENSMUSG00000027684	-0.9717
miranda	MIMAT0000677	mmu-miR-7a-5p	Rbmx	19655	ENSMUSG00000031134	-0.9705
miranda	MIMAT0000677	mmu-miR-7a-5p	Canx	12330	ENSMUSG00000020368	-0.9696
miranda	MIMAT0000677	mmu-miR-7a-5p	Hnrnph2	56258	ENSMUSG00000045427	-0.9689
miranda	MIMAT0000677	mmu-miR-7a-5p	Eogt	101351	ENSMUSG00000035245	-0.9688
miranda	MIMAT0000677	mmu-miR-7a-5p	Kif13a	16553	ENSMUSG00000021375	-0.9661
miranda	MIMAT0000677	mmu-miR-7a-5p	Gm608	207806	ENSMUSG00000068284	-0.965
miranda	MIMAT0000677	mmu-miR-7a-5p	Pdk3	236900	ENSMUSG00000035232	-0.9634
miranda	MIMAT0000677	mmu-miR-7a-5p	Gimap4	107526	ENSMUSG00000054435	-0.9627
miranda	MIMAT0000677	mmu-miR-7a-5p	Nono	53610	ENSMUSG00000031311	-0.9613
miranda	MIMAT0000677	mmu-miR-7a-5p	Dcun1d1	114893	ENSMUSG00000027708	-0.9612
miranda	MIMAT0000677	mmu-miR-7a-5p	Fgf11	14166	ENSMUSG00000042826	-0.9606
miranda	MIMAT0000677	mmu-miR-7a-5p	Serf2	378702	ENSMUSG00000074884	-0.9598
miranda	MIMAT0000677	mmu-miR-7a-5p	Phrf1	101471	ENSMUSG00000038611	-0.9593
miranda	MIMAT0000677	mmu-miR-7a-5p	Atp2b2	11941	ENSMUSG00000030302	-0.9592
miranda	MIMAT0000677	mmu-miR-7a-5p	Epdr1	105298	ENSMUSG00000002808	-0.9583
miranda	MIMAT0000677	mmu-miR-7a-5p	Gm4983	245297		-0.9569
miranda	MIMAT0000677	mmu-miR-7a-5p	Mrfap1	67568	ENSMUSG00000055302	-0.9568
miranda	MIMAT0000677	mmu-miR-7a-5p	Smim12	80284	ENSMUSG00000042380	-0.9557
miranda	MIMAT0000677	mmu-miR-7a-5p	Apon	28194	ENSMUSG00000051716	-0.9557
miranda	MIMAT0000677	mmu-miR-7a-5p	Rd3	74023	ENSMUSG00000049353	-0.9549
miranda	MIMAT0000677	mmu-miR-7a-5p	Atg4c	242557	ENSMUSG00000028550	-0.9542
miranda	MIMAT0000677	mmu-miR-7a-5p	9330188P03Rik	380930		-0.9533
miranda	MIMAT0000677	mmu-miR-7a-5p	Mtdh	67154	ENSMUSG00000022255	-0.9531
miranda	MIMAT0000677	mmu-miR-7a-5p	Ephx3	71932	ENSMUSG00000037577	-0.9526
miranda	MIMAT0000677	mmu-miR-7a-5p	Ilf2	67781	ENSMUSG00000001016	-0.9526
miranda	MIMAT0000677	mmu-miR-7a-5p	8030463A06Rik	414083		-0.9526
mirdb	MIMAT0000677	mmu-miR-7a-5p	Spata2	263876	ENSMUSG00000047030	96.0346
mirdb	MIMAT0000677	mmu-miR-7a-5p	Pole4	66979	ENSMUSG00000030042	94.8682
mirdb	MIMAT0000677	mmu-miR-7a-5p	Prkcb	18751	ENSMUSG00000052889	92.1109
mirdb	MIMAT0000677	mmu-miR-7a-5p	Tmem194	210035	ENSMUSG00000040195	89.4254
mirdb	MIMAT0000677	mmu-miR-7a-5p	9430020K01Rik	240185	ENSMUSG00000033960	87.9972
mirdb	MIMAT0000677	mmu-miR-7a-5p	Arid4a	238247	ENSMUSG00000048118	87.8936
mirdb	MIMAT0000677	mmu-miR-7a-5p	Kif16b	16558	ENSMUSG00000038844	86.9157
mirdb	MIMAT0000677	mmu-miR-7a-5p	Gtf2a1	83602	ENSMUSG00000020962	84.9644
mirdb	MIMAT0000677	mmu-miR-7a-5p	Pom121l2	195236	ENSMUSG00000016982	83.6734
mirdb	MIMAT0000677	mmu-miR-7a-5p	Serpina12	68054	ENSMUSG00000041567	83.655
pictar	MIMAT0000677	mmu-miR-7a-5p	Rgs8	67792	ENSMUSG00000042671	28.8539
pictar	MIMAT0000677	mmu-miR-7a-5p	Plxna4	243743	ENSMUSG00000029765	24.5901
pictar	MIMAT0000677	mmu-miR-7a-5p	Pappa	18491	ENSMUSG00000028370	22.489
pictar	MIMAT0000677	mmu-miR-7a-5p	Spata2	263876	ENSMUSG00000047030	21.3564
pictar	MIMAT0000677	mmu-miR-7a-5p	Slc22a23	73102	ENSMUSG00000038267	21.05
pita	MIMAT0000677	mmu-miR-7a-5p	Scai	320271	ENSMUSG00000035236	-20.06
pita	MIMAT0000677	mmu-miR-7a-5p	Snhg11	319317	ENSMUSG00000044349	-18.86
pita	MIMAT0000677	mmu-miR-7a-5p	Steap2	74051	ENSMUSG00000015653	-18.52
pita	MIMAT0000677	mmu-miR-7a-5p	Klhl15	236904	ENSMUSG00000043929	-18.5
pita	MIMAT0000677	mmu-miR-7a-5p	Tmem194	210035	ENSMUSG00000040195	-18.46
pita	MIMAT0000677	mmu-miR-7a-5p	Ubtfl1	546118	ENSMUSG00000074502	-18.33
pita	MIMAT0000677	mmu-miR-7a-5p	Stox2	71069	ENSMUSG00000038143	-18.07
pita	MIMAT0000677	mmu-miR-7a-5p	Hpcal4	170638	ENSMUSG00000046093	-18.07
pita	MIMAT0000677	mmu-miR-7a-5p	Prc1	233406	ENSMUSG00000038943	-18.02
pita	MIMAT0000677	mmu-miR-7a-5p	Mpv17l	93734	ENSMUSG00000022679	-17.96
pita	MIMAT0000677	mmu-miR-7a-5p	Bach2	12014	ENSMUSG00000040270	-17.56
pita	MIMAT0000677	mmu-miR-7a-5p	Spred3	101809	ENSMUSG00000037239	-17.56
pita	MIMAT0000677	mmu-miR-7a-5p	Kcna2	16490	ENSMUSG00000040724	-17.42
pita	MIMAT0000677	mmu-miR-7a-5p	Ipo11	76582	ENSMUSG00000042590	-17.34
pita	MIMAT0000677	mmu-miR-7a-5p	Styx	56291	ENSMUSG00000053205	-17.05
pita	MIMAT0000677	mmu-miR-7a-5p	Faxc	76132	ENSMUSG00000028246	-17.05
pita	MIMAT0000677	mmu-miR-7a-5p	Nek6	59126	ENSMUSG00000026749	-16.94
pita	MIMAT0000677	mmu-miR-7a-5p	D16Ertd472e	67102	ENSMUSG00000022864	-16.84
pita	MIMAT0000677	mmu-miR-7a-5p	Mob1b	68473	ENSMUSG00000006262	-16.81
pita	MIMAT0000677	mmu-miR-7a-5p	Vma21	67048	ENSMUSG00000073131	-16.62
pita	MIMAT0000677	mmu-miR-7a-5p	Prkacb	18749	ENSMUSG00000005034	-16.6
pita	MIMAT0000677	mmu-miR-7a-5p	H2-Ob	15002	ENSMUSG00000041538	-16.49
pita	MIMAT0000677	mmu-miR-7a-5p	Caprin1	53872	ENSMUSG00000027184	-16.4
pita	MIMAT0000677	mmu-miR-7a-5p	Gabrb2	14401	ENSMUSG00000007653	-16.29
pita	MIMAT0000677	mmu-miR-7a-5p	Atg10	66795	ENSMUSG00000021619	-16.24
pita	MIMAT0000677	mmu-miR-7a-5p	Trim60	234329	ENSMUSG00000053490	-16.24
pita	MIMAT0000677	mmu-miR-7a-5p	1110059G10Rik	66202	ENSMUSG00000032551	-16.22
pita	MIMAT0000677	mmu-miR-7a-5p	Mapkap1	227743	ENSMUSG00000038696	-15.98
pita	MIMAT0000677	mmu-miR-7a-5p	B230219D22Rik	78521	ENSMUSG00000045767	-15.97
pita	MIMAT0000677	mmu-miR-7a-5p	Map3k2	26405	ENSMUSG00000024383	-15.95
pita	MIMAT0000677	mmu-miR-7a-5p	Med17	234959	ENSMUSG00000031935	-15.86
pita	MIMAT0000677	mmu-miR-7a-5p	Naip6	17952	ENSMUSG00000078942	-15.82
pita	MIMAT0000677	mmu-miR-7a-5p	Naip6	101056649	ENSMUSG00000078942	-15.82
pita	MIMAT0000677	mmu-miR-7a-5p	Naip6	53880	ENSMUSG00000078942	-15.82
pita	MIMAT0000677	mmu-miR-7a-5p	Orc3	50793	ENSMUSG00000040044	-15.8
pita	MIMAT0000677	mmu-miR-7a-5p	Tbx20	57246	ENSMUSG00000031965	-15.78
pita	MIMAT0000677	mmu-miR-7a-5p	Kcnip4	80334	ENSMUSG00000029088	-15.71
pita	MIMAT0000677	mmu-miR-7a-5p	Pla2g2f	26971	ENSMUSG00000028749	-15.69
pita	MIMAT0000677	mmu-miR-7a-5p	Fam49b	223601	ENSMUSG00000022378	-15.68
pita	MIMAT0000677	mmu-miR-7a-5p	Steap2	74051	ENSMUSG00000015653	-15.66
pita	MIMAT0000677	mmu-miR-7a-5p	Tiprl	226591	ENSMUSG00000040843	-15.65
pita	MIMAT0000677	mmu-miR-7a-5p	Foxb1	64290	ENSMUSG00000059246	-15.62
pita	MIMAT0000677	mmu-miR-7a-5p	Acot5	217698	ENSMUSG00000042540	-15.61
pita	MIMAT0000677	mmu-miR-7a-5p	Trp53rk	76367	ENSMUSG00000042854	-15.58
pita	MIMAT0000677	mmu-miR-7a-5p	Nbeal1	269198	ENSMUSG00000073664	-15.57
pita	MIMAT0000677	mmu-miR-7a-5p	Rassf7	66985	ENSMUSG00000038618	-15.56
pita	MIMAT0000677	mmu-miR-7a-5p	Ywhah	22629	ENSMUSG00000018965	-15.53
pita	MIMAT0000677	mmu-miR-7a-5p	Ost4	67695	ENSMUSG00000038803	-15.52
pita	MIMAT0000677	mmu-miR-7a-5p	Gnal	14680	ENSMUSG00000024524	-15.49
pita	MIMAT0000677	mmu-miR-7a-5p	Adam19	11492	ENSMUSG00000011256	-15.47
pita	MIMAT0000677	mmu-miR-7a-5p	Ap1s2	108012	ENSMUSG00000031367	-15.46
pita	MIMAT0000677	mmu-miR-7a-5p	Tcp11l1	320554	ENSMUSG00000027175	-15.38
pita	MIMAT0000677	mmu-miR-7a-5p	Frmd8	67457	ENSMUSG00000024816	-15.36
pita	MIMAT0000677	mmu-miR-7a-5p	Gsk3a	606496	ENSMUSG00000057177	-15.33
pita	MIMAT0000677	mmu-miR-7a-5p	5330439B14Rik			-15.3
pita	MIMAT0000677	mmu-miR-7a-5p	Zfp85-rs1	22746	ENSMUSG00000058331	-15.3
pita	MIMAT0000677	mmu-miR-7a-5p	Tbc1d5	72238	ENSMUSG00000023923	-15.25
pita	MIMAT0000677	mmu-miR-7a-5p	Ufd1l	22230	ENSMUSG00000005262	-15.25
pita	MIMAT0000677	mmu-miR-7a-5p	Onecut2	225631	ENSMUSG00000045991	-15.21
pita	MIMAT0000677	mmu-miR-7a-5p	Homez	239099	ENSMUSG00000057156	-15.21
pita	MIMAT0000677	mmu-miR-7a-5p	Pde4a	18577	ENSMUSG00000032177	-15.19
pita	MIMAT0000677	mmu-miR-7a-5p	Glp2r	93896	ENSMUSG00000049928	-15.16
pita	MIMAT0000677	mmu-miR-7a-5p	Fam189a1	70638	ENSMUSG00000030518	-15.11
pita	MIMAT0000677	mmu-miR-7a-5p	Hmg20a	66867	ENSMUSG00000032329	-15.09
pita	MIMAT0000677	mmu-miR-7a-5p	Slc38a2	67760	ENSMUSG00000022462	-15.09
pita	MIMAT0000677	mmu-miR-7a-5p	Smco3	654818	ENSMUSG00000043298	-15.04
pita	MIMAT0000677	mmu-miR-7a-5p	E2f1	13555	ENSMUSG00000027490	-15.04
pita	MIMAT0000677	mmu-miR-7a-5p	Sepp1		ENSMUSG00000064373	-15.03
pita	MIMAT0000677	mmu-miR-7a-5p	Faxc	76132	ENSMUSG00000028246	-14.99
pita	MIMAT0000677	mmu-miR-7a-5p	Ybey	216119	ENSMUSG00000033126	-14.93
pita	MIMAT0000677	mmu-miR-7a-5p	Atp10b	319767	ENSMUSG00000055415	-14.88
pita	MIMAT0000677	mmu-miR-7a-5p	Atrx	22589	ENSMUSG00000031229	-14.79
pita	MIMAT0000677	mmu-miR-7a-5p	Myocd	214384	ENSMUSG00000020542	-14.77
pita	MIMAT0000677	mmu-miR-7a-5p	Clic5	224796	ENSMUSG00000023959	-14.75
pita	MIMAT0000677	mmu-miR-7a-5p	Diap2			-14.75
pita	MIMAT0000677	mmu-miR-7a-5p	Tmem86b	68255	ENSMUSG00000045282	-14.71
pita	MIMAT0000677	mmu-miR-7a-5p	D10Wsu102e	28109	ENSMUSG00000020255	-14.68
pita	MIMAT0000677	mmu-miR-7a-5p	Cnppd1	69171	ENSMUSG00000033159	-14.64
pita	MIMAT0000677	mmu-miR-7a-5p	4632428N05Rik	74048	ENSMUSG00000020101	-14.64
pita	MIMAT0000677	mmu-miR-7a-5p	Cbfa2t3	12398	ENSMUSG00000006362	-14.62
pita	MIMAT0000677	mmu-miR-7a-5p	Npas2	18143	ENSMUSG00000026077	-14.61
pita	MIMAT0000677	mmu-miR-7a-5p	Bop1	12181	ENSMUSG00000022557	-14.6
pita	MIMAT0000677	mmu-miR-7a-5p	Ddx17	67040	ENSMUSG00000055065	-14.6
pita	MIMAT0000677	mmu-miR-7a-5p	Trove2	20822	ENSMUSG00000018199	-14.59
pita	MIMAT0000677	mmu-miR-7a-5p	Slc8a1	20541	ENSMUSG00000054640	-14.57
pita	MIMAT0000677	mmu-miR-7a-5p	Secisbp2l	70354	ENSMUSG00000035093	-14.57
pita	MIMAT0000677	mmu-miR-7a-5p	Mlh3	217716	ENSMUSG00000021245	-14.57
pita	MIMAT0000677	mmu-miR-7a-5p	Golga1	76899	ENSMUSG00000026754	-14.57
pita	MIMAT0000677	mmu-miR-7a-5p	Stxbp5l	207227	ENSMUSG00000022829	-14.55
pita	MIMAT0000677	mmu-miR-7a-5p	Coro1c	23790	ENSMUSG00000004530	-14.55
pita	MIMAT0000677	mmu-miR-7a-5p	Far2	330450	ENSMUSG00000030303	-14.54
pita	MIMAT0000677	mmu-miR-7a-5p	Zdhhc20	75965	ENSMUSG00000021969	-14.54
pita	MIMAT0000677	mmu-miR-7a-5p	Pim1	18712	ENSMUSG00000024014	-14.53
pita	MIMAT0000677	mmu-miR-7a-5p	Mga	29808	ENSMUSG00000033943	-14.49
pita	MIMAT0000677	mmu-miR-7a-5p	Sh3rf1	59009	ENSMUSG00000031642	-14.46
pita	MIMAT0000677	mmu-miR-7a-5p	Tceanc	245695	ENSMUSG00000051224	-14.45
pita	MIMAT0000677	mmu-miR-7a-5p	Tram2	170829	ENSMUSG00000041779	-14.45
pita	MIMAT0000677	mmu-miR-7a-5p	Pygm	19309	ENSMUSG00000032648	-14.44
pita	MIMAT0000677	mmu-miR-7a-5p	Il2ra	16184	ENSMUSG00000026770	-14.44
pita	MIMAT0000677	mmu-miR-7a-5p	Zfyve27	319740	ENSMUSG00000018820	-14.42
pita	MIMAT0000677	mmu-miR-7a-5p	Wasf3	245880	ENSMUSG00000029636	-14.41
pita	MIMAT0000677	mmu-miR-7a-5p	Mapk10	26414	ENSMUSG00000046709	-14.39
pita	MIMAT0000677	mmu-miR-7a-5p	Vps26a	30930	ENSMUSG00000020078	-14.39
pita	MIMAT0000677	mmu-miR-7a-5p	Setd8	67956	ENSMUSG00000049327	-14.35
pita	MIMAT0000677	mmu-miR-7a-5p	Rasef	242505	ENSMUSG00000043003	-14.35
pita	MIMAT0000677	mmu-miR-7a-5p	Hspa4	15525	ENSMUSG00000020361	-14.34
pita	MIMAT0000677	mmu-miR-7a-5p	Mgme1	74528	ENSMUSG00000027424	-14.34
pita	MIMAT0000677	mmu-miR-7a-5p	1200011I18Rik	67467	ENSMUSG00000022008	-14.33
pita	MIMAT0000677	mmu-miR-7a-5p	Oas2	246728	ENSMUSG00000032690	-14.33
pita	MIMAT0000677	mmu-miR-7a-5p	Stk35	67333	ENSMUSG00000037885	-14.31
pita	MIMAT0000677	mmu-miR-7a-5p	Mecp2	17257	ENSMUSG00000031393	-14.3
pita	MIMAT0000677	mmu-miR-7a-5p	Fnd3c2	331491	ENSMUSG00000073012	-14.28
pita	MIMAT0000677	mmu-miR-7a-5p	Inpp5a	212111	ENSMUSG00000025477	-14.24
pita	MIMAT0000677	mmu-miR-7a-5p	Nmi	64685	ENSMUSG00000026946	-14.23
pita	MIMAT0000677	mmu-miR-7a-5p	Epsti1	108670	ENSMUSG00000022014	-14.22
pita	MIMAT0000677	mmu-miR-7a-5p	Trp63	22061	ENSMUSG00000022510	-14.22
pita	MIMAT0000677	mmu-miR-7a-5p	Cplx3	235415	ENSMUSG00000039714	-14.22
pita	MIMAT0000677	mmu-miR-7a-5p	Tcf7l2	21416	ENSMUSG00000024985	-14.21
pita	MIMAT0000677	mmu-miR-7a-5p	Ccdc120	54648	ENSMUSG00000031150	-14.2
pita	MIMAT0000677	mmu-miR-7a-5p	Zfp93	22755	ENSMUSG00000055305	-14.19
pita	MIMAT0000677	mmu-miR-7a-5p	Zfp212	232784	ENSMUSG00000052763	-14.19
pita	MIMAT0000677	mmu-miR-7a-5p	Ccdc28a	215814	ENSMUSG00000059554	-14.18
pita	MIMAT0000677	mmu-miR-7a-5p	Cbfa2t2	12396	ENSMUSG00000038533	-14.18
pita	MIMAT0000677	mmu-miR-7a-5p	Hs3st3b1	54710	ENSMUSG00000070407	-14.17
pita	MIMAT0000677	mmu-miR-7a-5p	Evc	59056	ENSMUSG00000029122	-14.17
pita	MIMAT0000677	mmu-miR-7a-5p	Herpud2	80517	ENSMUSG00000008429	-14.17
pita	MIMAT0000677	mmu-miR-7a-5p	Dsc3	13507	ENSMUSG00000059898	-14.14
pita	MIMAT0000677	mmu-miR-7a-5p	Praf2	54637	ENSMUSG00000031149	-14.14
pita	MIMAT0000677	mmu-miR-7a-5p	Zfp26	22688	ENSMUSG00000063108	-14.13
pita	MIMAT0000677	mmu-miR-7a-5p	Samd10	229011	ENSMUSG00000038605	-14.12
pita	MIMAT0000677	mmu-miR-7a-5p	Atp8b4	241633	ENSMUSG00000060131	-14.1
pita	MIMAT0000677	mmu-miR-7a-5p	Nkiras1	69721	ENSMUSG00000021772	-14.08
pita	MIMAT0000677	mmu-miR-7a-5p	Hus1	15574	ENSMUSG00000020413	-14.08
pita	MIMAT0000677	mmu-miR-7a-5p	Ahnak2			-14.06
pita	MIMAT0000677	mmu-miR-7a-5p	Tmem194	210035	ENSMUSG00000040195	-14.06
pita	MIMAT0000677	mmu-miR-7a-5p	Slc35e3	215436	ENSMUSG00000060181	-14.06
pita	MIMAT0000677	mmu-miR-7a-5p	Nrarp	67122	ENSMUSG00000078202	-14.05
pita	MIMAT0000677	mmu-miR-7a-5p	Frmpd3	245643	ENSMUSG00000042425	-14.04
pita	MIMAT0000677	mmu-miR-7a-5p	Ccbp2	59289	ENSMUSG00000044534	-14.03
pita	MIMAT0000677	mmu-miR-7a-5p	Fam131b	76156	ENSMUSG00000029861	-14.02
pita	MIMAT0000677	mmu-miR-7a-5p	Ttc7	225049	ENSMUSG00000036918	-14.02
pita	MIMAT0000677	mmu-miR-7a-5p	Atp8a1	11980	ENSMUSG00000037685	-14.01
pita	MIMAT0000677	mmu-miR-7a-5p	Sult3a1	57430	ENSMUSG00000069668	-14.01
pita	MIMAT0000677	mmu-miR-7a-5p	Atf7	223922	ENSMUSG00000052414	-14.01
pita	MIMAT0000677	mmu-miR-7a-5p	Raly	19383	ENSMUSG00000027593	-14
pita	MIMAT0000677	mmu-miR-7a-5p	Chia	81600	ENSMUSG00000062778	-14
pita	MIMAT0000677	mmu-miR-7a-5p	C130057N11Rik	19383	ENSMUSG00000027593	-14
pita	MIMAT0000677	mmu-miR-7a-5p	Kcnma1	16531	ENSMUSG00000063142	-13.99
pita	MIMAT0000677	mmu-miR-7a-5p	Lrp4	228357	ENSMUSG00000027253	-13.99
pita	MIMAT0000677	mmu-miR-7a-5p	Dtx3l	209200	ENSMUSG00000049502	-13.97
pita	MIMAT0000677	mmu-miR-7a-5p	Leng8	232798	ENSMUSG00000035545	-13.97
pita	MIMAT0000677	mmu-miR-7a-5p	Galnt13	271786	ENSMUSG00000060988	-13.96
pita	MIMAT0000677	mmu-miR-7a-5p	Cbx4	12418	ENSMUSG00000039989	-13.95
pita	MIMAT0000677	mmu-miR-7a-5p	Cep76	225659	ENSMUSG00000073542	-13.94
pita	MIMAT0000677	mmu-miR-7a-5p	Kif3a	16568	ENSMUSG00000018395	-13.92
pita	MIMAT0000677	mmu-miR-7a-5p	Acvr1c	269275	ENSMUSG00000026834	-13.89
pita	MIMAT0000677	mmu-miR-7a-5p	Psmf1	228769	ENSMUSG00000032869	-13.86
pita	MIMAT0000677	mmu-miR-7a-5p	Irs1	16367	ENSMUSG00000055980	-13.83
pita	MIMAT0000677	mmu-miR-7a-5p	Sub1	20024	ENSMUSG00000022205	-13.83
pita	MIMAT0000677	mmu-miR-7a-5p	Bard1	12021	ENSMUSG00000026196	-13.82
pita	MIMAT0000677	mmu-miR-7a-5p	Lmo3	109593	ENSMUSG00000030226	-13.8
pita	MIMAT0000677	mmu-miR-7a-5p	Dcstamp	75766	ENSMUSG00000022303	-13.8
pita	MIMAT0000677	mmu-miR-7a-5p	Arfgap2	77038	ENSMUSG00000027255	-13.78
pita	MIMAT0000677	mmu-miR-7a-5p	Lmnb1	16906	ENSMUSG00000024590	-13.77
pita	MIMAT0000677	mmu-miR-7a-5p	Wdr12	57750	ENSMUSG00000026019	-13.77
pita	MIMAT0000677	mmu-miR-7a-5p	Slc39a1	30791	ENSMUSG00000052310	-13.77
pita	MIMAT0000677	mmu-miR-7a-5p	Taf11	68776	ENSMUSG00000024218	-13.76
pita	MIMAT0000677	mmu-miR-7a-5p	Zfhx3	11906	ENSMUSG00000038872	-13.72
pita	MIMAT0000677	mmu-miR-7a-5p	Mc3r	17201	ENSMUSG00000038537	-13.72
pita	MIMAT0000677	mmu-miR-7a-5p	Zfp936	668620	ENSMUSG00000064194	-13.71
pita	MIMAT0000677	mmu-miR-7a-5p	Polr3d	67065	ENSMUSG00000000776	-13.7
pita	MIMAT0000677	mmu-miR-7a-5p	Thap2	66816	ENSMUSG00000020137	-13.7
pita	MIMAT0000677	mmu-miR-7a-5p	2510003E04Rik	72320	ENSMUSG00000036955	-13.69
pita	MIMAT0000677	mmu-miR-7a-5p	Pcdhb10	93881	ENSMUSG00000045657	-13.67
pita	MIMAT0000677	mmu-miR-7a-5p	Pdcd6	18570	ENSMUSG00000021576	-13.65
pita	MIMAT0000677	mmu-miR-7a-5p	Comtd1	69156	ENSMUSG00000021773	-13.65
pita	MIMAT0000677	mmu-miR-7a-5p	Med17	234959	ENSMUSG00000031935	-13.64
pita	MIMAT0000677	mmu-miR-7a-5p	A1cf	69865	ENSMUSG00000052595	-13.64
pita	MIMAT0000677	mmu-miR-7a-5p	Cltb	74325	ENSMUSG00000047547	-13.64
pita	MIMAT0000677	mmu-miR-7a-5p	Cpn2	71756	ENSMUSG00000023176	-13.64
pita	MIMAT0000677	mmu-miR-7a-5p	D2Wsu81e	227695	ENSMUSG00000039660	-13.63
pita	MIMAT0000677	mmu-miR-7a-5p	Faf1	14084	ENSMUSG00000010517	-13.61
pita	MIMAT0000677	mmu-miR-7a-5p	Stmn2	20257	ENSMUSG00000027500	-13.6
pita	MIMAT0000677	mmu-miR-7a-5p	Rag1	19373	ENSMUSG00000061311	-13.6
pita	MIMAT0000677	mmu-miR-7a-5p	Phf12	268448	ENSMUSG00000037791	-13.6
pita	MIMAT0000677	mmu-miR-7a-5p	Terf2ip	57321	ENSMUSG00000033430	-13.58
pita	MIMAT0000677	mmu-miR-7a-5p	Pcyt1a	13026	ENSMUSG00000005615	-13.57
pita	MIMAT0000677	mmu-miR-7a-5p	Arf4	11843	ENSMUSG00000021877	-13.56
pita	MIMAT0000677	mmu-miR-7a-5p	Nfia	18027	ENSMUSG00000028565	-13.56
pita	MIMAT0000677	mmu-miR-7a-5p	Kdm5c	20591	ENSMUSG00000025332	-13.55
pita	MIMAT0000677	mmu-miR-7a-5p	Ctnnbip1	67087	ENSMUSG00000028988	-13.54
pita	MIMAT0000677	mmu-miR-7a-5p	Pip4k2a	18718	ENSMUSG00000026737	-13.54
pita	MIMAT0000677	mmu-miR-7a-5p	Zfp78	330463	ENSMUSG00000055150	-13.53
pita	MIMAT0000677	mmu-miR-7a-5p	Pphln1	223828	ENSMUSG00000036167	-13.53
pita	MIMAT0000677	mmu-miR-7a-5p	Cdc23	52563	ENSMUSG00000024370	-13.51
pita	MIMAT0000677	mmu-miR-7a-5p	Crtc1	382056	ENSMUSG00000003575	-13.49
pita	MIMAT0000677	mmu-miR-7a-5p	D3Ertd254e	241944	ENSMUSG00000033883	-13.49
pita	MIMAT0000677	mmu-miR-7a-5p	Mfap3	216760	ENSMUSG00000020522	-13.45
pita	MIMAT0000677	mmu-miR-7a-5p	Ahrr	11624	ENSMUSG00000021575	-13.43
pita	MIMAT0000677	mmu-miR-7a-5p	Agphd1	235386	ENSMUSG00000035878	-13.43
pita	MIMAT0000677	mmu-miR-7a-5p	F9	14071	ENSMUSG00000031138	-13.42
pita	MIMAT0000677	mmu-miR-7a-5p	Krt75	109052	ENSMUSG00000022986	-13.41
pita	MIMAT0000677	mmu-miR-7a-5p	Lrrc59	98238	ENSMUSG00000020869	-13.41
pita	MIMAT0000677	mmu-miR-7a-5p	Zfyve27	319740	ENSMUSG00000018820	-13.38
pita	MIMAT0000677	mmu-miR-7a-5p	Rasgrp3	240168	ENSMUSG00000071042	-13.37
pita	MIMAT0000677	mmu-miR-7a-5p	Prrg3	208748	ENSMUSG00000033361	-13.36
pita	MIMAT0000677	mmu-miR-7a-5p	Snx8	231834	ENSMUSG00000029560	-13.34
pita	MIMAT0000677	mmu-miR-7a-5p	St8sia2	20450	ENSMUSG00000025789	-13.34
pita	MIMAT0000677	mmu-miR-7a-5p	Hoxc6	15425	ENSMUSG00000001661	-13.34
pita	MIMAT0000677	mmu-miR-7a-5p	Zfp597	71063	ENSMUSG00000039789	-13.34
pita	MIMAT0000677	mmu-miR-7a-5p	Perp	64058	ENSMUSG00000019851	-13.31
pita	MIMAT0000677	mmu-miR-7a-5p	Ntrk2	18212	ENSMUSG00000055254	-13.31
pita	MIMAT0000677	mmu-miR-7a-5p	Vmn2r89	22301	ENSMUSG00000070448	-13.28
pita	MIMAT0000677	mmu-miR-7a-5p	Lbh	77889	ENSMUSG00000024063	-13.28
pita	MIMAT0000677	mmu-miR-7a-5p	3110035E14Rik	76982	ENSMUSG00000067879	-13.27
pita	MIMAT0000677	mmu-miR-7a-5p	Tcea1	21399	ENSMUSG00000033813	-13.27
pita	MIMAT0000677	mmu-miR-7a-5p	Pik3cd	18707	ENSMUSG00000039936	-13.26
pita	MIMAT0000677	mmu-miR-7a-5p	Syt1	20979	ENSMUSG00000035864	-13.26
pita	MIMAT0000677	mmu-miR-7a-5p	Fnbp1l	214459	ENSMUSG00000039735	-13.26
pita	MIMAT0000677	mmu-miR-7a-5p	Utp11l	67205	ENSMUSG00000028907	-13.26
pita	MIMAT0000677	mmu-miR-7a-5p	Gm13242	100041379	ENSMUSG00000058186	-13.25
pita	MIMAT0000677	mmu-miR-7a-5p	Tmem245	242474	ENSMUSG00000055296	-13.25
pita	MIMAT0000677	mmu-miR-7a-5p	Rybp	56353	ENSMUSG00000072872	-13.24
pita	MIMAT0000677	mmu-miR-7a-5p	Rybp	628746	ENSMUSG00000072872	-13.24
pita	MIMAT0000677	mmu-miR-7a-5p	Cdh1	12550	ENSMUSG00000000303	-13.22
pita	MIMAT0000677	mmu-miR-7a-5p	Arhgef38	77669	ENSMUSG00000040969	-13.2
pita	MIMAT0000677	mmu-miR-7a-5p	Emcn	59308	ENSMUSG00000054690	-13.19
pita	MIMAT0000677	mmu-miR-7a-5p	Agl	77559	ENSMUSG00000033400	-13.19
pita	MIMAT0000677	mmu-miR-7a-5p	Chchd5	66170	ENSMUSG00000037938	-13.18
pita	MIMAT0000677	mmu-miR-7a-5p	Rexo2	104444	ENSMUSG00000032026	-13.16
pita	MIMAT0000677	mmu-miR-7a-5p	Orai2	269717	ENSMUSG00000039747	-13.15
pita	MIMAT0000677	mmu-miR-7a-5p	C130050O18Rik	319772	ENSMUSG00000044092	-13.15
pita	MIMAT0000677	mmu-miR-7a-5p	Cfi	12630	ENSMUSG00000058952	-13.15
pita	MIMAT0000677	mmu-miR-7a-5p	5830411N06Rik	244234	ENSMUSG00000054672	-13.14
pita	MIMAT0000677	mmu-miR-7a-5p	Zfp707	69020	ENSMUSG00000034429	-13.14
pita	MIMAT0000677	mmu-miR-7a-5p	Smg8	74133	ENSMUSG00000020495	-13.14
pita	MIMAT0000677	mmu-miR-7a-5p	E2f7	52679	ENSMUSG00000020185	-13.13
pita	MIMAT0000677	mmu-miR-7a-5p	Ube4a	140630	ENSMUSG00000059890	-13.11
pita	MIMAT0000677	mmu-miR-7a-5p	Pbx1	18514	ENSMUSG00000052534	-13.09
pita	MIMAT0000677	mmu-miR-7a-5p	Il1r1	16177	ENSMUSG00000026072	-13.09
pita	MIMAT0000677	mmu-miR-7a-5p	Cdk12	69131	ENSMUSG00000003119	-13.08
pita	MIMAT0000677	mmu-miR-7a-5p	Nadkd1	68646	ENSMUSG00000022253	-13.08
pita	MIMAT0000677	mmu-miR-7a-5p	Tcf12	21406	ENSMUSG00000032228	-13.07
pita	MIMAT0000677	mmu-miR-7a-5p	Flt4	14257	ENSMUSG00000020357	-13.05
pita	MIMAT0000677	mmu-miR-7a-5p	Dmrt2	226049	ENSMUSG00000048138	-13.05
pita	MIMAT0000677	mmu-miR-7a-5p	Prr14l	215476	ENSMUSG00000054280	-13.04
pita	MIMAT0000677	mmu-miR-7a-5p	Zbtb8b	215627	ENSMUSG00000048485	-13.04
pita	MIMAT0000677	mmu-miR-7a-5p	Dlx2	13392	ENSMUSG00000023391	-13.02
pita	MIMAT0000677	mmu-miR-7a-5p	Ptpn1	19246	ENSMUSG00000027540	-13
pita	MIMAT0000677	mmu-miR-7a-5p	Nipal4	214112	ENSMUSG00000020411	-13
pita	MIMAT0000677	mmu-miR-7a-5p	Pfpl	56093	ENSMUSG00000040065	-12.99
pita	MIMAT0000677	mmu-miR-7a-5p	Rundc1	217201	ENSMUSG00000035007	-12.97
pita	MIMAT0000677	mmu-miR-7a-5p	Uggt1	100044322	ENSMUSG00000037470	-12.96
pita	MIMAT0000677	mmu-miR-7a-5p	Ddit4l	73284	ENSMUSG00000046818	-12.96
pita	MIMAT0000677	mmu-miR-7a-5p	Sp1	20683	ENSMUSG00000001280	-12.96
pita	MIMAT0000677	mmu-miR-7a-5p	Uggt1	320011	ENSMUSG00000037470	-12.96
pita	MIMAT0000677	mmu-miR-7a-5p	Tmem127	69470	ENSMUSG00000034850	-12.95
pita	MIMAT0000677	mmu-miR-7a-5p	Mrpl1	94061	ENSMUSG00000029486	-12.94
pita	MIMAT0000677	mmu-miR-7a-5p	Camk1	52163	ENSMUSG00000030272	-12.94
pita	MIMAT0000677	mmu-miR-7a-5p	Osmr	18414	ENSMUSG00000022146	-12.93
pita	MIMAT0000677	mmu-miR-7a-5p	Lphn2	99633	ENSMUSG00000028184	-12.93
pita	MIMAT0000677	mmu-miR-7a-5p	C1qb	12260	ENSMUSG00000036905	-12.92
pita	MIMAT0000677	mmu-miR-7a-5p	Ptpmt1			-12.91
pita	MIMAT0000677	mmu-miR-7a-5p	Galnt6	207839	ENSMUSG00000037280	-12.91
pita	MIMAT0000677	mmu-miR-7a-5p	Sdad1	231452	ENSMUSG00000029415	-12.9
pita	MIMAT0000677	mmu-miR-7a-5p	Epha5	13839	ENSMUSG00000029245	-12.89
pita	MIMAT0000677	mmu-miR-7a-5p	Ptprd	19266	ENSMUSG00000028399	-12.89
pita	MIMAT0000677	mmu-miR-7a-5p	Amer2	72125	ENSMUSG00000021986	-12.88
pita	MIMAT0000677	mmu-miR-7a-5p	Skp2	27401	ENSMUSG00000054115	-12.88
pita	MIMAT0000677	mmu-miR-7a-5p	Mme	17380	ENSMUSG00000027820	-12.87
pita	MIMAT0000677	mmu-miR-7a-5p	0610007P14Rik	58520	ENSMUSG00000021252	-12.86
pita	MIMAT0000677	mmu-miR-7a-5p	Trim16	94092	ENSMUSG00000047821	-12.86
pita	MIMAT0000677	mmu-miR-7a-5p	Aak1	269774	ENSMUSG00000057230	-12.85
pita	MIMAT0000677	mmu-miR-7a-5p	Elf1	13709	ENSMUSG00000036461	-12.85
pita	MIMAT0000677	mmu-miR-7a-5p	Cnnm4	94220	ENSMUSG00000037408	-12.85
pita	MIMAT0000677	mmu-miR-7a-5p	Scel	64929	ENSMUSG00000022123	-12.85
pita	MIMAT0000677	mmu-miR-7a-5p	Slc25a23	66972	ENSMUSG00000046329	-12.85
pita	MIMAT0000677	mmu-miR-7a-5p	Cyb5b	66427	ENSMUSG00000031924	-12.83
pita	MIMAT0000677	mmu-miR-7a-5p	Snd1	56463	ENSMUSG00000001424	-12.83
pita	MIMAT0000677	mmu-miR-7a-5p	Ctsb	13030	ENSMUSG00000021939	-12.83
pita	MIMAT0000677	mmu-miR-7a-5p	Kcnmb1	16533	ENSMUSG00000020155	-12.83
pita	MIMAT0000677	mmu-miR-7a-5p	Cyb5b	100047577	ENSMUSG00000031924	-12.83
pita	MIMAT0000677	mmu-miR-7a-5p	Ptk2b	19229	ENSMUSG00000059456	-12.82
pita	MIMAT0000677	mmu-miR-7a-5p	Tmod2	50876	ENSMUSG00000032186	-12.82
pita	MIMAT0000677	mmu-miR-7a-5p	Jak2	16452	ENSMUSG00000024789	-12.8
pita	MIMAT0000677	mmu-miR-7a-5p	Sema5a	20356	ENSMUSG00000022231	-12.79
pita	MIMAT0000677	mmu-miR-7a-5p	Chrna4	11438	ENSMUSG00000027577	-12.79
pita	MIMAT0000677	mmu-miR-7a-5p	Kctd7	212919	ENSMUSG00000034110	-12.78
pita	MIMAT0000677	mmu-miR-7a-5p	Mdga1	74762	ENSMUSG00000043557	-12.78
pita	MIMAT0000677	mmu-miR-7a-5p	Sptlc2	20773	ENSMUSG00000021036	-12.78
pita	MIMAT0000677	mmu-miR-7a-5p	Adrbk2	320129	ENSMUSG00000042249	-12.78
pita	MIMAT0000677	mmu-miR-7a-5p	Tmem223	66836	ENSMUSG00000075043	-12.77
pita	MIMAT0000677	mmu-miR-7a-5p	Slc6a8	102857	ENSMUSG00000019558	-12.77
pita	MIMAT0000677	mmu-miR-7a-5p	Sh3rf3	237353	ENSMUSG00000037990	-12.76
pita	MIMAT0000677	mmu-miR-7a-5p	Hsd17b12	56348	ENSMUSG00000027195	-12.76
pita	MIMAT0000677	mmu-miR-7a-5p	Ubn2	320538	ENSMUSG00000038538	-12.76
pita	MIMAT0000677	mmu-miR-7a-5p	Csta	209294	ENSMUSG00000034362	-12.75
pita	MIMAT0000677	mmu-miR-7a-5p	Prkch	18755	ENSMUSG00000021108	-12.74
pita	MIMAT0000677	mmu-miR-7a-5p	Rasgrp4	233046	ENSMUSG00000030589	-12.74
pita	MIMAT0000677	mmu-miR-7a-5p	Chrna6	11440	ENSMUSG00000031491	-12.74
pita	MIMAT0000677	mmu-miR-7a-5p	Rab27b	80718	ENSMUSG00000024511	-12.73
pita	MIMAT0000677	mmu-miR-7a-5p	Slc16a5	217316	ENSMUSG00000045775	-12.73
pita	MIMAT0000677	mmu-miR-7a-5p	Mll1	214162	ENSMUSG00000002028	-12.72
pita	MIMAT0000677	mmu-miR-7a-5p	Mecp2	17257	ENSMUSG00000031393	-12.72
pita	MIMAT0000677	mmu-miR-7a-5p	Hdac1	433759	ENSMUSG00000028800	-12.71
pita	MIMAT0000677	mmu-miR-7a-5p	Mios	252875	ENSMUSG00000042447	-12.7
pita	MIMAT0000677	mmu-miR-7a-5p	Serpina12	68054	ENSMUSG00000041567	-12.68
pita	MIMAT0000677	mmu-miR-7a-5p	Gm12888	545677	ENSMUSG00000073764	-12.67
pita	MIMAT0000677	mmu-miR-7a-5p	Fam210b	67017	ENSMUSG00000027495	-12.67
pita	MIMAT0000677	mmu-miR-7a-5p	Pes1	64934	ENSMUSG00000020430	-12.66
pita	MIMAT0000677	mmu-miR-7a-5p	Trim31	224762	ENSMUSG00000058063	-12.66
pita	MIMAT0000677	mmu-miR-7a-5p	Btf3l4	70533	ENSMUSG00000028568	-12.66
pita	MIMAT0000677	mmu-miR-7a-5p	Rnf38	73469	ENSMUSG00000035696	-12.66
pita	MIMAT0000677	mmu-miR-7a-5p	Pygm	19309	ENSMUSG00000032648	-12.66
pita	MIMAT0000677	mmu-miR-7a-5p	Aak1	269774	ENSMUSG00000057230	-12.65
pita	MIMAT0000677	mmu-miR-7a-5p	Nlrp3	216799	ENSMUSG00000032691	-12.63
pita	MIMAT0000677	mmu-miR-7a-5p	Krt4	16682	ENSMUSG00000059668	-12.62
pita	MIMAT0000677	mmu-miR-7a-5p	Slc38a10	72055	ENSMUSG00000061306	-12.61
pita	MIMAT0000677	mmu-miR-7a-5p	Rsad2	58185	ENSMUSG00000020641	-12.61
pita	MIMAT0000677	mmu-miR-7a-5p	Sgpp2	433323	ENSMUSG00000032908	-12.61
pita	MIMAT0000677	mmu-miR-7a-5p	Hoxc6	15425	ENSMUSG00000001661	-12.6
pita	MIMAT0000677	mmu-miR-7a-5p	AA388235			-12.58
pita	MIMAT0000677	mmu-miR-7a-5p	Morc3	338467	ENSMUSG00000039456	-12.57
pita	MIMAT0000677	mmu-miR-7a-5p	Enpp4	224794	ENSMUSG00000023961	-12.55
pita	MIMAT0000677	mmu-miR-7a-5p	Nr1h2	22260	ENSMUSG00000060601	-12.55
pita	MIMAT0000677	mmu-miR-7a-5p	Zfp503	218820	ENSMUSG00000039081	-12.54
pita	MIMAT0000677	mmu-miR-7a-5p	Lrp2bp	67620	ENSMUSG00000031637	-12.54
pita	MIMAT0000677	mmu-miR-7a-5p	Doc2b	13447	ENSMUSG00000020848	-12.54
pita	MIMAT0000677	mmu-miR-7a-5p	Cyp2b9	13094	ENSMUSG00000040660	-12.53
pita	MIMAT0000677	mmu-miR-7a-5p	Zfp395	380912	ENSMUSG00000034522	-12.51
pita	MIMAT0000677	mmu-miR-7a-5p	Gabarapl1	57436	ENSMUSG00000030161	-12.51
pita	MIMAT0000677	mmu-miR-7a-5p	Zbtb8b	215627	ENSMUSG00000048485	-12.5
pita	MIMAT0000677	mmu-miR-7a-5p	Cdc73	214498	ENSMUSG00000026361	-12.49
pita	MIMAT0000677	mmu-miR-7a-5p	Rsbn1	229675	ENSMUSG00000044098	-12.48
pita	MIMAT0000677	mmu-miR-7a-5p	Lrrc16a	68732	ENSMUSG00000021338	-12.47
pita	MIMAT0000677	mmu-miR-7a-5p	4933426M11Rik	217684	ENSMUSG00000021133	-12.46
pita	MIMAT0000677	mmu-miR-7a-5p	Dclk1	13175	ENSMUSG00000027797	-12.45
pita	MIMAT0000677	mmu-miR-7a-5p	Sprr2f	20760	ENSMUSG00000050635	-12.45
pita	MIMAT0000677	mmu-miR-7a-5p	Prr11	270906	ENSMUSG00000020493	-12.44
pita	MIMAT0000677	mmu-miR-7a-5p	Csta	209294	ENSMUSG00000034362	-12.44
pita	MIMAT0000677	mmu-miR-7a-5p	Zfp655	72611	ENSMUSG00000007812	-12.44
pita	MIMAT0000677	mmu-miR-7a-5p	Fbxw11	103583	ENSMUSG00000020271	-12.44
pita	MIMAT0000677	mmu-miR-7a-5p	Rfc5	72151	ENSMUSG00000029363	-12.44
pita	MIMAT0000677	mmu-miR-7a-5p	Ppara	19013	ENSMUSG00000022383	-12.43
pita	MIMAT0000677	mmu-miR-7a-5p	Tspyl5	239364	ENSMUSG00000038984	-12.43
pita	MIMAT0000677	mmu-miR-7a-5p	Slc12a8	171286	ENSMUSG00000035506	-12.43
pita	MIMAT0000677	mmu-miR-7a-5p	Itga4	16401	ENSMUSG00000027009	-12.43
pita	MIMAT0000677	mmu-miR-7a-5p	Slc6a11	243616	ENSMUSG00000030307	-12.43
pita	MIMAT0000677	mmu-miR-7a-5p	Zfp606			-12.42
pita	MIMAT0000677	mmu-miR-7a-5p	Rmdn2	381110	ENSMUSG00000036368	-12.42
pita	MIMAT0000677	mmu-miR-7a-5p	Cul4b	72584	ENSMUSG00000031095	-12.41
pita	MIMAT0000677	mmu-miR-7a-5p	Mta2	23942	ENSMUSG00000071646	-12.41
pita	MIMAT0000677	mmu-miR-7a-5p	Cacnb4	12298	ENSMUSG00000017412	-12.4
pita	MIMAT0000677	mmu-miR-7a-5p	Vezf1	22344	ENSMUSG00000018377	-12.39
pita	MIMAT0000677	mmu-miR-7a-5p	Neurog1	18014	ENSMUSG00000048904	-12.39
pita	MIMAT0000677	mmu-miR-7a-5p	Ggnbp2	217039	ENSMUSG00000020530	-12.39
pita	MIMAT0000677	mmu-miR-7a-5p	Sec63	140740	ENSMUSG00000019802	-12.39
pita	MIMAT0000677	mmu-miR-7a-5p	Tacr3	21338	ENSMUSG00000028172	-12.38
pita	MIMAT0000677	mmu-miR-7a-5p	Plcl1	227120	ENSMUSG00000038349	-12.38
pita	MIMAT0000677	mmu-miR-7a-5p	Macrod2	101056500	ENSMUSG00000068205	-12.38
pita	MIMAT0000677	mmu-miR-7a-5p	Macrod2	72899	ENSMUSG00000068205	-12.38
pita	MIMAT0000677	mmu-miR-7a-5p	Csmd3	239420	ENSMUSG00000022311	-12.38
pita	MIMAT0000677	mmu-miR-7a-5p	Gm216	241112	ENSMUSG00000073650	-12.37
pita	MIMAT0000677	mmu-miR-7a-5p	Pias1	56469	ENSMUSG00000032405	-12.37
pita	MIMAT0000677	mmu-miR-7a-5p	F9	14071	ENSMUSG00000031138	-12.36
pita	MIMAT0000677	mmu-miR-7a-5p	Mapk10	26414	ENSMUSG00000046709	-12.36
pita	MIMAT0000677	mmu-miR-7a-5p	Psg29	114872	ENSMUSG00000023159	-12.36
pita	MIMAT0000677	mmu-miR-7a-5p	Cpxm2	55987	ENSMUSG00000030862	-12.35
pita	MIMAT0000677	mmu-miR-7a-5p	Scn3a	20269	ENSMUSG00000057182	-12.35
pita	MIMAT0000677	mmu-miR-7a-5p	Trim52	212085	ENSMUSG00000022113	-12.35
pita	MIMAT0000677	mmu-miR-7a-5p	Atxn1l	52335	ENSMUSG00000069895	-12.35
pita	MIMAT0000677	mmu-miR-7a-5p	Itga4	16401	ENSMUSG00000027009	-12.34
pita	MIMAT0000677	mmu-miR-7a-5p	Akap5	238276	ENSMUSG00000021057	-12.34
pita	MIMAT0000677	mmu-miR-7a-5p	Atp1b2	11932	ENSMUSG00000041329	-12.32
pita	MIMAT0000677	mmu-miR-7a-5p	Tmem30a	69981	ENSMUSG00000032328	-12.31
pita	MIMAT0000677	mmu-miR-7a-5p	Col4a1	12826	ENSMUSG00000031502	-12.3
pita	MIMAT0000677	mmu-miR-7a-5p	Slc16a9	66859	ENSMUSG00000037762	-12.3
pita	MIMAT0000677	mmu-miR-7a-5p	Mapk8ip2	60597	ENSMUSG00000022619	-12.29
pita	MIMAT0000677	mmu-miR-7a-5p	Htr2c	15560	ENSMUSG00000041380	-12.28
pita	MIMAT0000677	mmu-miR-7a-5p	Plin4	57435	ENSMUSG00000002831	-12.27
pita	MIMAT0000677	mmu-miR-7a-5p	St8sia3	20451	ENSMUSG00000056812	-12.26
pita	MIMAT0000677	mmu-miR-7a-5p	Slc7a14	241919	ENSMUSG00000069072	-12.26
pita	MIMAT0000677	mmu-miR-7a-5p	Rasgrp1	19419	ENSMUSG00000027347	-12.25
pita	MIMAT0000677	mmu-miR-7a-5p	Sp1	20683	ENSMUSG00000001280	-12.25
pita	MIMAT0000677	mmu-miR-7a-5p	Mrpl17	27397	ENSMUSG00000030879	-12.25
pita	MIMAT0000677	mmu-miR-7a-5p	9430020K01Rik	240185	ENSMUSG00000033960	-12.23
pita	MIMAT0000677	mmu-miR-7a-5p	Mfn2	170731	ENSMUSG00000029020	-12.23
pita	MIMAT0000677	mmu-miR-7a-5p	Mbnl1	56758	ENSMUSG00000027763	-12.22
pita	MIMAT0000677	mmu-miR-7a-5p	Ncam2	17968	ENSMUSG00000022762	-12.22
pita	MIMAT0000677	mmu-miR-7a-5p	Mrpl55	67212	ENSMUSG00000036860	-12.21
pita	MIMAT0000677	mmu-miR-7a-5p	Tmub2	72053	ENSMUSG00000034757	-12.2
pita	MIMAT0000677	mmu-miR-7a-5p	Krt33a	71888	ENSMUSG00000035592	-12.2
pita	MIMAT0000677	mmu-miR-7a-5p	Nr2c1	22025	ENSMUSG00000005897	-12.2
pita	MIMAT0000677	mmu-miR-7a-5p	Dclk1	13175	ENSMUSG00000027797	-12.2
pita	MIMAT0000677	mmu-miR-7a-5p	Thoc2	331401	ENSMUSG00000037475	-12.19
pita	MIMAT0000677	mmu-miR-7a-5p	Yod1	226418	ENSMUSG00000046404	-12.19
pita	MIMAT0000677	mmu-miR-7a-5p	Pkia	18767	ENSMUSG00000027499	-12.18
pita	MIMAT0000677	mmu-miR-7a-5p	Atp1a3	232975	ENSMUSG00000040907	-12.18
pita	MIMAT0000677	mmu-miR-7a-5p	Commd8	27784	ENSMUSG00000029213	-12.18
pita	MIMAT0000677	mmu-miR-7a-5p	Mfn2	170731	ENSMUSG00000029020	-12.17
pita	MIMAT0000677	mmu-miR-7a-5p	Gca	227960	ENSMUSG00000026893	-12.17
pita	MIMAT0000677	mmu-miR-7a-5p	Slc4a8	59033	ENSMUSG00000023032	-12.16
pita	MIMAT0000677	mmu-miR-7a-5p	Dsg1a	13510	ENSMUSG00000069441	-12.16
pita	MIMAT0000677	mmu-miR-7a-5p	Mrps25	64658	ENSMUSG00000014551	-12.15
pita	MIMAT0000677	mmu-miR-7a-5p	Dnase1l3	13421	ENSMUSG00000025279	-12.15
pita	MIMAT0000677	mmu-miR-7a-5p	Zfp831	100043757	ENSMUSG00000050600	-12.15
pita	MIMAT0000677	mmu-miR-7a-5p	Cep164	214552	ENSMUSG00000043987	-12.14
pita	MIMAT0000677	mmu-miR-7a-5p	Cldn25	224250	ENSMUSG00000022744	-12.13
pita	MIMAT0000677	mmu-miR-7a-5p	Nek6	59126	ENSMUSG00000026749	-12.13
pita	MIMAT0000677	mmu-miR-7a-5p	Ccdc14	239839	ENSMUSG00000022833	-12.13
pita	MIMAT0000677	mmu-miR-7a-5p	Slc5a1	20537	ENSMUSG00000011034	-12.12
pita	MIMAT0000677	mmu-miR-7a-5p	Rspry1	67610	ENSMUSG00000050079	-12.12
pita	MIMAT0000677	mmu-miR-7a-5p	Tsc1	64930	ENSMUSG00000026812	-12.12
pita	MIMAT0000677	mmu-miR-7a-5p	Tmem88b	320587	ENSMUSG00000073680	-12.12
pita	MIMAT0000677	mmu-miR-7a-5p	Lbr	98386	ENSMUSG00000004880	-12.11
pita	MIMAT0000677	mmu-miR-7a-5p	Frem2	242022	ENSMUSG00000037016	-12.11
pita	MIMAT0000677	mmu-miR-7a-5p	Vti1a	53611	ENSMUSG00000024983	-12.11
pita	MIMAT0000677	mmu-miR-7a-5p	Lrrc1	214345	ENSMUSG00000032352	-12.1
pita	MIMAT0000677	mmu-miR-7a-5p	Fam53c	66306	ENSMUSG00000034300	-12.1
pita	MIMAT0000677	mmu-miR-7a-5p	BC030500	234290	ENSMUSG00000049946	-12.1
pita	MIMAT0000677	mmu-miR-7a-5p	Atp6ap1	54411	ENSMUSG00000019087	-12.1
pita	MIMAT0000677	mmu-miR-7a-5p	Fbxo28	67948	ENSMUSG00000047539	-12.1
pita	MIMAT0000677	mmu-miR-7a-5p	Acat1	110446	ENSMUSG00000032047	-12.09
pita	MIMAT0000677	mmu-miR-7a-5p	Map3k1	26401	ENSMUSG00000021754	-12.08
pita	MIMAT0000677	mmu-miR-7a-5p	Tdrd1	83561	ENSMUSG00000025081	-12.08
pita	MIMAT0000677	mmu-miR-7a-5p	Aplp2	11804	ENSMUSG00000031996	-12.07
pita	MIMAT0000677	mmu-miR-7a-5p	Cenpf	108000	ENSMUSG00000026605	-12.07
pita	MIMAT0000677	mmu-miR-7a-5p	Sh3pxd2b	268396	ENSMUSG00000040711	-12.06
pita	MIMAT0000677	mmu-miR-7a-5p	Fam63b	235461	ENSMUSG00000042444	-12.06
pita	MIMAT0000677	mmu-miR-7a-5p	Letmd1	68614	ENSMUSG00000037353	-12.05
pita	MIMAT0000677	mmu-miR-7a-5p	Wipf2	68524	ENSMUSG00000038013	-12.04
pita	MIMAT0000677	mmu-miR-7a-5p	Tfap2c	21420	ENSMUSG00000028640	-12.04
pita	MIMAT0000677	mmu-miR-7a-5p	Pgm5	226041	ENSMUSG00000041731	-12.04
pita	MIMAT0000677	mmu-miR-7a-5p	Snrnp27	66618	ENSMUSG00000001158	-12.04
pita	MIMAT0000677	mmu-miR-7a-5p	Rffl	67338	ENSMUSG00000020696	-12.03
pita	MIMAT0000677	mmu-miR-7a-5p	Cox11	69802	ENSMUSG00000020544	-12.02
pita	MIMAT0000677	mmu-miR-7a-5p	Mtpap	67440	ENSMUSG00000024234	-12.02
pita	MIMAT0000677	mmu-miR-7a-5p	Azgp1	12007	ENSMUSG00000037053	-12.01
pita	MIMAT0000677	mmu-miR-7a-5p	Rif1	51869	ENSMUSG00000036202	-12.01
pita	MIMAT0000677	mmu-miR-7a-5p	L3mbtl4	320858	ENSMUSG00000041565	-12.01
pita	MIMAT0000677	mmu-miR-7a-5p	Crbn	58799	ENSMUSG00000005362	-12.01
pita	MIMAT0000677	mmu-miR-7a-5p	Psd3	234353	ENSMUSG00000030465	-12.01
pita	MIMAT0000677	mmu-miR-7a-5p	Rgs13	246709	ENSMUSG00000051079	-12.01
pita	MIMAT0000677	mmu-miR-7a-5p	Rps6kc1	320119	ENSMUSG00000089872	-12
pita	MIMAT0000677	mmu-miR-7a-5p	1600014C10Rik	72244	ENSMUSG00000054676	-11.99
pita	MIMAT0000677	mmu-miR-7a-5p	Aldh6a1	104776	ENSMUSG00000021238	-11.99
pita	MIMAT0000677	mmu-miR-7a-5p	Cul2	71745	ENSMUSG00000024231	-11.99
pita	MIMAT0000677	mmu-miR-7a-5p	Ptgdr	19214	ENSMUSG00000071489	-11.99
pita	MIMAT0000677	mmu-miR-7a-5p	Il2ra	16184	ENSMUSG00000026770	-11.99
pita	MIMAT0000677	mmu-miR-7a-5p	Snap29	67474	ENSMUSG00000022765	-11.99
pita	MIMAT0000677	mmu-miR-7a-5p	Fam168a	319604	ENSMUSG00000029461	-11.99
pita	MIMAT0000677	mmu-miR-7a-5p	C77370	245555	ENSMUSG00000046449	-11.99
pita	MIMAT0000677	mmu-miR-7a-5p	Dsg1a	13510	ENSMUSG00000069441	-11.99
pita	MIMAT0000677	mmu-miR-7a-5p	Gtf2b	229906	ENSMUSG00000028271	-11.99
pita	MIMAT0000677	mmu-miR-7a-5p	Sdha	66945	ENSMUSG00000021577	-11.99
pita	MIMAT0000677	mmu-miR-7a-5p	Cd38	12494	ENSMUSG00000029084	-11.99
pita	MIMAT0000677	mmu-miR-7a-5p	Hnrnpa2b1	100045191	ENSMUSG00000004980	-11.97
pita	MIMAT0000677	mmu-miR-7a-5p	Arcn1	213827	ENSMUSG00000032096	-11.97
pita	MIMAT0000677	mmu-miR-7a-5p	Tpra1	24100	ENSMUSG00000002871	-11.97
pita	MIMAT0000677	mmu-miR-7a-5p	Tmem255a	245386	ENSMUSG00000036502	-11.97
pita	MIMAT0000677	mmu-miR-7a-5p	Hnrnpa2b1	53379	ENSMUSG00000004980	-11.97
pita	MIMAT0000677	mmu-miR-7a-5p	Ucp3	22229	ENSMUSG00000032942	-11.97
pita	MIMAT0000677	mmu-miR-7a-5p	Palm2	242481	ENSMUSG00000090053	-11.96
pita	MIMAT0000677	mmu-miR-7a-5p	Nkap	67050	ENSMUSG00000016409	-11.96
pita	MIMAT0000677	mmu-miR-7a-5p	Chrm1	12669	ENSMUSG00000032773	-11.96
pita	MIMAT0000677	mmu-miR-7a-5p	Adam7	11500	ENSMUSG00000022056	-11.95
pita	MIMAT0000677	mmu-miR-7a-5p	Pgr	18667	ENSMUSG00000031870	-11.95
pita	MIMAT0000677	mmu-miR-7a-5p	Cyp4a32	100040843	ENSMUSG00000063929	-11.95
pita	MIMAT0000677	mmu-miR-7a-5p	Mrpl1	94061	ENSMUSG00000029486	-11.95
pita	MIMAT0000677	mmu-miR-7a-5p	Ildr1	106347	ENSMUSG00000022900	-11.94
pita	MIMAT0000677	mmu-miR-7a-5p	Lin7a	108030	ENSMUSG00000019906	-11.93
pita	MIMAT0000677	mmu-miR-7a-5p	Trim33	94093	ENSMUSG00000033014	-11.93
pita	MIMAT0000677	mmu-miR-7a-5p	Tmem117	320709	ENSMUSG00000063296	-11.92
pita	MIMAT0000677	mmu-miR-7a-5p	Zfand3	21769	ENSMUSG00000044477	-11.92
pita	MIMAT0000677	mmu-miR-7a-5p	Serp1	28146	ENSMUSG00000027808	-11.92
pita	MIMAT0000677	mmu-miR-7a-5p	Mul1	68350	ENSMUSG00000041241	-11.92
pita	MIMAT0000677	mmu-miR-7a-5p	Spr	20751	ENSMUSG00000033735	-11.91
pita	MIMAT0000677	mmu-miR-7a-5p	Ssr1	107513	ENSMUSG00000021427	-11.91
pita	MIMAT0000677	mmu-miR-7a-5p	Syne1	64009	ENSMUSG00000096054	-11.91
pita	MIMAT0000677	mmu-miR-7a-5p	Phf20l1	239510	ENSMUSG00000072501	-11.91
pita	MIMAT0000677	mmu-miR-7a-5p	Ss18l1	269397	ENSMUSG00000039086	-11.9
pita	MIMAT0000677	mmu-miR-7a-5p	Reps2	194590	ENSMUSG00000040855	-11.9
pita	MIMAT0000677	mmu-miR-7a-5p	Prelp	116847	ENSMUSG00000041577	-11.89
pita	MIMAT0000677	mmu-miR-7a-5p	Slc23a2	54338	ENSMUSG00000027340	-11.89
pita	MIMAT0000677	mmu-miR-7a-5p	Ldlrad3	241576	ENSMUSG00000048058	-11.89
pita	MIMAT0000677	mmu-miR-7a-5p	Ccdc120	54648	ENSMUSG00000031150	-11.89
pita	MIMAT0000677	mmu-miR-7a-5p	1200014J11Rik	66874	ENSMUSG00000020783	-11.88
pita	MIMAT0000677	mmu-miR-7a-5p	Fam212b	109050	ENSMUSG00000048458	-11.88
pita	MIMAT0000677	mmu-miR-7a-5p	Ap5m1	74385	ENSMUSG00000036291	-11.88
pita	MIMAT0000677	mmu-miR-7a-5p	Rgs18	64214	ENSMUSG00000026357	-11.87
pita	MIMAT0000677	mmu-miR-7a-5p	Gxylt1	223827	ENSMUSG00000036197	-11.87
pita	MIMAT0000677	mmu-miR-7a-5p	Ccser2	72972	ENSMUSG00000058690	-11.87
pita	MIMAT0000677	mmu-miR-7a-5p	Bop1	12181	ENSMUSG00000022557	-11.86
pita	MIMAT0000677	mmu-miR-7a-5p	Wnt2b	22414	ENSMUSG00000027840	-11.86
pita	MIMAT0000677	mmu-miR-7a-5p	Aldh1a7	26358	ENSMUSG00000024747	-11.86
pita	MIMAT0000677	mmu-miR-7a-5p	Cdkl3	213084	ENSMUSG00000020389	-11.85
pita	MIMAT0000677	mmu-miR-7a-5p	Tmem68	72098	ENSMUSG00000028232	-11.85
pita	MIMAT0000677	mmu-miR-7a-5p	Zfp788	67607	ENSMUSG00000074165	-11.84
pita	MIMAT0000677	mmu-miR-7a-5p	Slc22a13	102570	ENSMUSG00000074028	-11.84
pita	MIMAT0000677	mmu-miR-7a-5p	Cxxc4	319478	ENSMUSG00000044365	-11.84
pita	MIMAT0000677	mmu-miR-7a-5p	Scn2a1	110876	ENSMUSG00000075318	-11.84
pita	MIMAT0000677	mmu-miR-7a-5p	Pcbp2	18521	ENSMUSG00000056851	-11.84
pita	MIMAT0000677	mmu-miR-7a-5p	Cyp2b13	13089	ENSMUSG00000040583	-11.84
pita	MIMAT0000677	mmu-miR-7a-5p	Sel1l	20338	ENSMUSG00000020964	-11.83
pita	MIMAT0000677	mmu-miR-7a-5p	Rnf141	67150	ENSMUSG00000030788	-11.83
pita	MIMAT0000677	mmu-miR-7a-5p	Tmem33	67878	ENSMUSG00000037720	-11.82
pita	MIMAT0000677	mmu-miR-7a-5p	Scai	320271	ENSMUSG00000035236	-11.82
pita	MIMAT0000677	mmu-miR-7a-5p	Ccng1	12450	ENSMUSG00000020326	-11.81
pita	MIMAT0000677	mmu-miR-7a-5p	Tnfaip3	21929	ENSMUSG00000019850	-11.81
pita	MIMAT0000677	mmu-miR-7a-5p	Lef1	16842	ENSMUSG00000027985	-11.8
pita	MIMAT0000677	mmu-miR-7a-5p	Lipk	240633	ENSMUSG00000024771	-11.8
pita	MIMAT0000677	mmu-miR-7a-5p	Lingo4	320747	ENSMUSG00000044505	-11.8
pita	MIMAT0000677	mmu-miR-7a-5p	Phyhipl	70911	ENSMUSG00000037747	-11.8
pita	MIMAT0000677	mmu-miR-7a-5p	Ino80d	227195	ENSMUSG00000040865	-11.8
pita	MIMAT0000677	mmu-miR-7a-5p	Dach1	13134	ENSMUSG00000055639	-11.79
pita	MIMAT0000677	mmu-miR-7a-5p	Anxa7	11750	ENSMUSG00000021814	-11.79
pita	MIMAT0000677	mmu-miR-7a-5p	Pira2	18725	ENSMUSG00000089942	-11.79
pita	MIMAT0000677	mmu-miR-7a-5p	Psg29	114872	ENSMUSG00000023159	-11.79
pita	MIMAT0000677	mmu-miR-7a-5p	Pira2	18722	ENSMUSG00000089942	-11.79
pita	MIMAT0000677	mmu-miR-7a-5p	Derl1	67819	ENSMUSG00000022365	-11.79
pita	MIMAT0000677	mmu-miR-7a-5p	Ammecr1	56068	ENSMUSG00000042225	-11.78
pita	MIMAT0000677	mmu-miR-7a-5p	Rag2	19374	ENSMUSG00000032864	-11.76
pita	MIMAT0000677	mmu-miR-7a-5p	Osbpl11	106326	ENSMUSG00000022807	-11.76
pita	MIMAT0000677	mmu-miR-7a-5p	Trim12c	319236	ENSMUSG00000057143	-11.76
pita	MIMAT0000677	mmu-miR-7a-5p	Reg1	19692	ENSMUSG00000059654	-11.76
pita	MIMAT0000677	mmu-miR-7a-5p	Rab38	72433	ENSMUSG00000030559	-11.76
pita	MIMAT0000677	mmu-miR-7a-5p	Znhit3	448850	ENSMUSG00000020526	-11.75
pita	MIMAT0000677	mmu-miR-7a-5p	Slamf6	30925	ENSMUSG00000015314	-11.75
pita	MIMAT0000677	mmu-miR-7a-5p	Srp54b	665155	ENSMUSG00000079108	-11.74
pita	MIMAT0000677	mmu-miR-7a-5p	Srp54b	24067	ENSMUSG00000079108	-11.74
pita	MIMAT0000677	mmu-miR-7a-5p	1110057K04Rik	68832	ENSMUSG00000037669	-11.74
pita	MIMAT0000677	mmu-miR-7a-5p	Gpcpd1	74182	ENSMUSG00000027346	-11.74
pita	MIMAT0000677	mmu-miR-7a-5p	Srp54c	100101806	ENSMUSG00000021020	-11.74
pita	MIMAT0000677	mmu-miR-7a-5p	Tmem45a	56277	ENSMUSG00000022754	-11.74
pita	MIMAT0000677	mmu-miR-7a-5p	Traf4	22032	ENSMUSG00000017386	-11.73
pita	MIMAT0000677	mmu-miR-7a-5p	Irak3	73914	ENSMUSG00000020227	-11.73
pita	MIMAT0000677	mmu-miR-7a-5p	Tomm22	223696	ENSMUSG00000022427	-11.73
pita	MIMAT0000677	mmu-miR-7a-5p	Cnn3	71994	ENSMUSG00000053931	-11.73
pita	MIMAT0000677	mmu-miR-7a-5p	Ube2k	53323	ENSMUSG00000029203	-11.73
pita	MIMAT0000677	mmu-miR-7a-5p	Mrfap1	67568	ENSMUSG00000055302	-11.72
pita	MIMAT0000677	mmu-miR-7a-5p	Sppl2b	73218	ENSMUSG00000035206	-11.72
pita	MIMAT0000677	mmu-miR-7a-5p	Map2	17756	ENSMUSG00000015222	-11.72
pita	MIMAT0000677	mmu-miR-7a-5p	Sec63	140740	ENSMUSG00000019802	-11.71
pita	MIMAT0000677	mmu-miR-7a-5p	Pla2g2f	26971	ENSMUSG00000028749	-11.71
pita	MIMAT0000677	mmu-miR-7a-5p	Wdr37	207615	ENSMUSG00000021147	-11.7
pita	MIMAT0000677	mmu-miR-7a-5p	Atf6	226641	ENSMUSG00000026663	-11.7
pita	MIMAT0000677	mmu-miR-7a-5p	Gpr37l1	171469	ENSMUSG00000026424	-11.7
pita	MIMAT0000677	mmu-miR-7a-5p	Ermap	27028	ENSMUSG00000028644	-11.7
pita	MIMAT0000677	mmu-miR-7a-5p	Tmem167b	67495	ENSMUSG00000068732	-11.69
pita	MIMAT0000677	mmu-miR-7a-5p	Chrm1	12669	ENSMUSG00000032773	-11.69
pita	MIMAT0000677	mmu-miR-7a-5p	Ceacam20	71601	ENSMUSG00000070777	-11.68
pita	MIMAT0000677	mmu-miR-7a-5p	Bysl	53414	ENSMUSG00000023988	-11.68
pita	MIMAT0000677	mmu-miR-7a-5p	Cenpf	108000	ENSMUSG00000026605	-11.68
pita	MIMAT0000677	mmu-miR-7a-5p	Nrep	27528	ENSMUSG00000042834	-11.68
pita	MIMAT0000677	mmu-miR-7a-5p	Atp1b2	11932	ENSMUSG00000041329	-11.68
pita	MIMAT0000677	mmu-miR-7a-5p	Dusp11	72102	ENSMUSG00000030002	-11.67
pita	MIMAT0000677	mmu-miR-7a-5p	Nras	18176	ENSMUSG00000027852	-11.67
pita	MIMAT0000677	mmu-miR-7a-5p	Entpd5	12499	ENSMUSG00000021236	-11.67
pita	MIMAT0000677	mmu-miR-7a-5p	Lrtm2	211187	ENSMUSG00000055003	-11.66
pita	MIMAT0000677	mmu-miR-7a-5p	Reps2	194590	ENSMUSG00000040855	-11.66
pita	MIMAT0000677	mmu-miR-7a-5p	Rnf185	193670	ENSMUSG00000020448	-11.66
pita	MIMAT0000677	mmu-miR-7a-5p	Zfp512	269639	ENSMUSG00000062761	-11.65
pita	MIMAT0000677	mmu-miR-7a-5p	Gbp7	229900	ENSMUSG00000040253	-11.65
pita	MIMAT0000677	mmu-miR-7a-5p	Kif13a	16553	ENSMUSG00000021375	-11.65
pita	MIMAT0000677	mmu-miR-7a-5p	Naa11	97243	ENSMUSG00000046000	-11.65
pita	MIMAT0000677	mmu-miR-7a-5p	Amd2	100041585	ENSMUSG00000063953	-11.65
pita	MIMAT0000677	mmu-miR-7a-5p	Tmem164	209497	ENSMUSG00000047045	-11.65
pita	MIMAT0000677	mmu-miR-7a-5p	Cyp2s1	74134	ENSMUSG00000040703	-11.65
pita	MIMAT0000677	mmu-miR-7a-5p	Prrc2c	226562	ENSMUSG00000040225	-11.64
pita	MIMAT0000677	mmu-miR-7a-5p	Slc4a8	59033	ENSMUSG00000023032	-11.64
pita	MIMAT0000677	mmu-miR-7a-5p	Grb10	14783	ENSMUSG00000020176	-11.63
pita	MIMAT0000677	mmu-miR-7a-5p	Dnajb4	67035	ENSMUSG00000028035	-11.63
pita	MIMAT0000677	mmu-miR-7a-5p	Dcp1a	75901	ENSMUSG00000021962	-11.63
pita	MIMAT0000677	mmu-miR-7a-5p	Sptbn2	20743	ENSMUSG00000067889	-11.62
pita	MIMAT0000677	mmu-miR-7a-5p	2610034B18Rik	70420	ENSMUSG00000039043	-11.62
pita	MIMAT0000677	mmu-miR-7a-5p	Dnajc19	100503724	ENSMUSG00000027679	-11.62
pita	MIMAT0000677	mmu-miR-7a-5p	Mobp	17433	ENSMUSG00000032517	-11.62
pita	MIMAT0000677	mmu-miR-7a-5p	Dnajc19	67713	ENSMUSG00000027679	-11.62
pita	MIMAT0000677	mmu-miR-7a-5p	9530091C08Rik			-11.62
pita	MIMAT0000677	mmu-miR-7a-5p	Ctns	83429	ENSMUSG00000005949	-11.61
pita	MIMAT0000677	mmu-miR-7a-5p	Wdr47	99512	ENSMUSG00000040389	-11.61
pita	MIMAT0000677	mmu-miR-7a-5p	Npnt	114249	ENSMUSG00000040998	-11.61
pita	MIMAT0000677	mmu-miR-7a-5p	Cdk7	12572	ENSMUSG00000069089	-11.6
pita	MIMAT0000677	mmu-miR-7a-5p	Relb	19698	ENSMUSG00000002983	-11.6
pita	MIMAT0000677	mmu-miR-7a-5p	Prrt2	69017	ENSMUSG00000045114	-11.6
pita	MIMAT0000677	mmu-miR-7a-5p	Bche	12038	ENSMUSG00000027792	-11.59
pita	MIMAT0000677	mmu-miR-7a-5p	Fmr1	14265	ENSMUSG00000000838	-11.59
pita	MIMAT0000677	mmu-miR-7a-5p	Dclre1b	140917	ENSMUSG00000027845	-11.59
pita	MIMAT0000677	mmu-miR-7a-5p	Kcnv1	67498	ENSMUSG00000022342	-11.58
pita	MIMAT0000677	mmu-miR-7a-5p	Nipal2	223473	ENSMUSG00000038879	-11.57
pita	MIMAT0000677	mmu-miR-7a-5p	Lrrc15	74488	ENSMUSG00000052316	-11.57
pita	MIMAT0000677	mmu-miR-7a-5p	Ido2	209176	ENSMUSG00000031549	-11.56
pita	MIMAT0000677	mmu-miR-7a-5p	Boc	117606	ENSMUSG00000022687	-11.56
pita	MIMAT0000677	mmu-miR-7a-5p	Fuca2	66848	ENSMUSG00000019810	-11.56
pita	MIMAT0000677	mmu-miR-7a-5p	Pla2g16	225845	ENSMUSG00000060675	-11.56
pita	MIMAT0000677	mmu-miR-7a-5p	Smg6	103677	ENSMUSG00000038290	-11.55
pita	MIMAT0000677	mmu-miR-7a-5p	Ugt2b1	71773	ENSMUSG00000035836	-11.55
pita	MIMAT0000677	mmu-miR-7a-5p	Mapre1	13589	ENSMUSG00000027479	-11.54
pita	MIMAT0000677	mmu-miR-7a-5p	Ccdc122	108811	ENSMUSG00000034795	-11.54
pita	MIMAT0000677	mmu-miR-7a-5p	Suz12	52615	ENSMUSG00000017548	-11.54
pita	MIMAT0000677	mmu-miR-7a-5p	Cmas	12764	ENSMUSG00000030282	-11.54
pita	MIMAT0000677	mmu-miR-7a-5p	Enpp4	224794	ENSMUSG00000023961	-11.54
pita	MIMAT0000677	mmu-miR-7a-5p	Tmem245	242474	ENSMUSG00000055296	-11.53
pita	MIMAT0000677	mmu-miR-7a-5p	Rcsd1	226594	ENSMUSG00000040723	-11.53
pita	MIMAT0000677	mmu-miR-7a-5p	Rexo1	66932	ENSMUSG00000047417	-11.53
pita	MIMAT0000677	mmu-miR-7a-5p	Aoah	27052	ENSMUSG00000021322	-11.52
pita	MIMAT0000677	mmu-miR-7a-5p	Ing5	66262	ENSMUSG00000026283	-11.52
pita	MIMAT0000677	mmu-miR-7a-5p	Il2ra	16184	ENSMUSG00000026770	-11.52
pita	MIMAT0000677	mmu-miR-7a-5p	Gdpgp1	269952	ENSMUSG00000050973	-11.52
pita	MIMAT0000677	mmu-miR-7a-5p	Mecp2	17257	ENSMUSG00000031393	-11.52
pita	MIMAT0000677	mmu-miR-7a-5p	Fam53c	66306	ENSMUSG00000034300	-11.52
pita	MIMAT0000677	mmu-miR-7a-5p	Col4a3	12828	ENSMUSG00000079465	-11.51
pita	MIMAT0000677	mmu-miR-7a-5p	Trub2	227682	ENSMUSG00000039826	-11.51
pita	MIMAT0000677	mmu-miR-7a-5p	Rnf144b	218215	ENSMUSG00000038068	-11.5
pita	MIMAT0000677	mmu-miR-7a-5p	Acer2	230379	ENSMUSG00000038007	-11.5
pita	MIMAT0000677	mmu-miR-7a-5p	Mpc1	55951	ENSMUSG00000023861	-11.5
pita	MIMAT0000677	mmu-miR-7a-5p	Dnajc16	214063	ENSMUSG00000040697	-11.49
pita	MIMAT0000677	mmu-miR-7a-5p	Endov	338371	ENSMUSG00000039850	-11.49
pita	MIMAT0000677	mmu-miR-7a-5p	Slc7a15	328059	ENSMUSG00000020600	-11.49
pita	MIMAT0000677	mmu-miR-7a-5p	Itga4	16401	ENSMUSG00000027009	-11.49
pita	MIMAT0000677	mmu-miR-7a-5p	Afap1	70292	ENSMUSG00000029094	-11.49
pita	MIMAT0000677	mmu-miR-7a-5p	C1qc	12262	ENSMUSG00000036896	-11.48
pita	MIMAT0000677	mmu-miR-7a-5p	D430041D05Rik	241589	ENSMUSG00000068373	-11.48
pita	MIMAT0000677	mmu-miR-7a-5p	Ccl6	20305	ENSMUSG00000018927	-11.48
pita	MIMAT0000677	mmu-miR-7a-5p	Slc12a9	83704	ENSMUSG00000037344	-11.48
pita	MIMAT0000677	mmu-miR-7a-5p	Elovl6	170439	ENSMUSG00000041220	-11.48
pita	MIMAT0000677	mmu-miR-7a-5p	Klf4	16600	ENSMUSG00000003032	-11.47
pita	MIMAT0000677	mmu-miR-7a-5p	Map7d1	245877	ENSMUSG00000028849	-11.47
pita	MIMAT0000677	mmu-miR-7a-5p	Tmem109	68539	ENSMUSG00000034659	-11.46
pita	MIMAT0000677	mmu-miR-7a-5p	4930539E08Rik	207819	ENSMUSG00000048905	-11.46
pita	MIMAT0000677	mmu-miR-7a-5p	Capn1	12333	ENSMUSG00000024942	-11.46
pita	MIMAT0000677	mmu-miR-7a-5p	Ptplad2	66775	ENSMUSG00000028497	-11.46
pita	MIMAT0000677	mmu-miR-7a-5p	Trim66	330627	ENSMUSG00000031026	-11.46
pita	MIMAT0000677	mmu-miR-7a-5p	Sec22a	317717	ENSMUSG00000034473	-11.44
pita	MIMAT0000677	mmu-miR-7a-5p	Rab27b	80718	ENSMUSG00000024511	-11.44
pita	MIMAT0000677	mmu-miR-7a-5p	OTTMUSG00000012686			-11.44
pita	MIMAT0000677	mmu-miR-7a-5p	Med13	327987	ENSMUSG00000034297	-11.43
pita	MIMAT0000677	mmu-miR-7a-5p	Pigv	230801	ENSMUSG00000043257	-11.43
pita	MIMAT0000677	mmu-miR-7a-5p	Megf11	214058	ENSMUSG00000036466	-11.43
pita	MIMAT0000677	mmu-miR-7a-5p	Napg	108123	ENSMUSG00000024581	-11.42
pita	MIMAT0000677	mmu-miR-7a-5p	Braf	109880	ENSMUSG00000002413	-11.42
pita	MIMAT0000677	mmu-miR-7a-5p	Fgfr1op	75296	ENSMUSG00000069135	-11.42
pita	MIMAT0000677	mmu-miR-7a-5p	Magi1	14924	ENSMUSG00000045095	-11.41
pita	MIMAT0000677	mmu-miR-7a-5p	Dtx3l	209200	ENSMUSG00000049502	-11.41
pita	MIMAT0000677	mmu-miR-7a-5p	Hhip	15245	ENSMUSG00000064325	-11.41
pita	MIMAT0000677	mmu-miR-7a-5p	Zc4h2	245522	ENSMUSG00000035062	-11.41
pita	MIMAT0000677	mmu-miR-7a-5p	Rpusd2	271842	ENSMUSG00000027324	-11.41
pita	MIMAT0000677	mmu-miR-7a-5p	Hyal6	74409	ENSMUSG00000029679	-11.4
pita	MIMAT0000677	mmu-miR-7a-5p	Slc12a1	20495	ENSMUSG00000027202	-11.4
pita	MIMAT0000677	mmu-miR-7a-5p	Stau2	29819	ENSMUSG00000025920	-11.4
pita	MIMAT0000677	mmu-miR-7a-5p	Edem1	192193	ENSMUSG00000030104	-11.4
pita	MIMAT0000677	mmu-miR-7a-5p	Fam20b	215015	ENSMUSG00000033557	-11.4
pita	MIMAT0000677	mmu-miR-7a-5p	C130060K24Rik	243407	ENSMUSG00000029917	-11.4
pita	MIMAT0000677	mmu-miR-7a-5p	Rdh1	107605	ENSMUSG00000089789	-11.4
pita	MIMAT0000677	mmu-miR-7a-5p	Gm5615	434396	ENSMUSG00000074448	-11.39
pita	MIMAT0000677	mmu-miR-7a-5p	Rnf144a	108089	ENSMUSG00000020642	-11.39
pita	MIMAT0000677	mmu-miR-7a-5p	Setd7	73251	ENSMUSG00000037111	-11.39
pita	MIMAT0000677	mmu-miR-7a-5p	Rbm33	381626	ENSMUSG00000048271	-11.39
pita	MIMAT0000677	mmu-miR-7a-5p	Hif3a	53417	ENSMUSG00000004328	-11.39
pita	MIMAT0000677	mmu-miR-7a-5p	Gnas	14683	ENSMUSG00000027523	-11.39
pita	MIMAT0000677	mmu-miR-7a-5p	Napa	108124	ENSMUSG00000006024	-11.39
pita	MIMAT0000677	mmu-miR-7a-5p	Opcml	330908	ENSMUSG00000062257	-11.39
pita	MIMAT0000677	mmu-miR-7a-5p	2010002M12Rik	112419	ENSMUSG00000067297	-11.39
pita	MIMAT0000677	mmu-miR-7a-5p	Tanc1	66860	ENSMUSG00000035168	-11.38
pita	MIMAT0000677	mmu-miR-7a-5p	Pecam1	18613	ENSMUSG00000020717	-11.38
pita	MIMAT0000677	mmu-miR-7a-5p	Itch	16396	ENSMUSG00000027598	-11.38
pita	MIMAT0000677	mmu-miR-7a-5p	Gca	227960	ENSMUSG00000026893	-11.38
pita	MIMAT0000677	mmu-miR-7a-5p	Zxdc	80292	ENSMUSG00000034430	-11.37
pita	MIMAT0000677	mmu-miR-7a-5p	Pphln1	223828	ENSMUSG00000036167	-11.36
pita	MIMAT0000677	mmu-miR-7a-5p	Serpinb13	241196	ENSMUSG00000048775	-11.36
pita	MIMAT0000677	mmu-miR-7a-5p	Mysm1	320713	ENSMUSG00000062627	-11.36
pita	MIMAT0000677	mmu-miR-7a-5p	Srgap3	259302	ENSMUSG00000030257	-11.36
pita	MIMAT0000677	mmu-miR-7a-5p	Tmem9	66241	ENSMUSG00000026411	-11.36
pita	MIMAT0000677	mmu-miR-7a-5p	Chrm1	12669	ENSMUSG00000032773	-11.35
pita	MIMAT0000677	mmu-miR-7a-5p	Trp53rk	76367	ENSMUSG00000042854	-11.35
pita	MIMAT0000677	mmu-miR-7a-5p	Hic2	58180	ENSMUSG00000050240	-11.35
pita	MIMAT0000677	mmu-miR-7a-5p	Rgs7bp	52882	ENSMUSG00000021719	-11.35
pita	MIMAT0000677	mmu-miR-7a-5p	Vwa1	246228	ENSMUSG00000042116	-11.35
pita	MIMAT0000677	mmu-miR-7a-5p	Eya1	14048	ENSMUSG00000025932	-11.34
pita	MIMAT0000677	mmu-miR-7a-5p	Ccbe1	320924	ENSMUSG00000046318	-11.34
pita	MIMAT0000677	mmu-miR-7a-5p	Hormad2	75828	ENSMUSG00000020419	-11.33
pita	MIMAT0000677	mmu-miR-7a-5p	Peg10	170676	ENSMUSG00000092035	-11.33
pita	MIMAT0000677	mmu-miR-7a-5p	Spon1	233744	ENSMUSG00000038156	-11.33
pita	MIMAT0000677	mmu-miR-7a-5p	Wipf2	68524	ENSMUSG00000038013	-11.33
pita	MIMAT0000677	mmu-miR-7a-5p	Sh3d19	27059	ENSMUSG00000028082	-11.32
pita	MIMAT0000677	mmu-miR-7a-5p	Inip	66209	ENSMUSG00000038544	-11.32
pita	MIMAT0000677	mmu-miR-7a-5p	Gstz1	14874	ENSMUSG00000021033	-11.32
pita	MIMAT0000677	mmu-miR-7a-5p	H2-M10.5	224761	ENSMUSG00000037246	-11.31
pita	MIMAT0000677	mmu-miR-7a-5p	Pdlim1	54132	ENSMUSG00000055044	-11.31
pita	MIMAT0000677	mmu-miR-7a-5p	H2-M10.5	101056455	ENSMUSG00000037246	-11.31
pita	MIMAT0000677	mmu-miR-7a-5p	Gm16515	24083	ENSMUSG00000018931	-11.31
pita	MIMAT0000677	mmu-miR-7a-5p	Rasef	242505	ENSMUSG00000043003	-11.3
pita	MIMAT0000677	mmu-miR-7a-5p	Rgs20	58175	ENSMUSG00000002459	-11.3
pita	MIMAT0000677	mmu-miR-7a-5p	Luc7l	66978	ENSMUSG00000024188	-11.3
pita	MIMAT0000677	mmu-miR-7a-5p	Serac1	321007	ENSMUSG00000015659	-11.3
pita	MIMAT0000677	mmu-miR-7a-5p	Ppp4r2	232314	ENSMUSG00000052144	-11.29
pita	MIMAT0000677	mmu-miR-7a-5p	Sema5a	20356	ENSMUSG00000022231	-11.29
pita	MIMAT0000677	mmu-miR-7a-5p	Nckap1l	105855	ENSMUSG00000022488	-11.29
pita	MIMAT0000677	mmu-miR-7a-5p	Bpifa1	18843	ENSMUSG00000027483	-11.28
pita	MIMAT0000677	mmu-miR-7a-5p	Uspl1	231915	ENSMUSG00000041264	-11.27
pita	MIMAT0000677	mmu-miR-7a-5p	4933427D06Rik	232217	ENSMUSG00000055403	-11.26
pita	MIMAT0000677	mmu-miR-7a-5p	Map3k1	26401	ENSMUSG00000021754	-11.26
pita	MIMAT0000677	mmu-miR-7a-5p	Parp11	101187	ENSMUSG00000037997	-11.26
pita	MIMAT0000677	mmu-miR-7a-5p	Srr	27364	ENSMUSG00000001323	-11.25
pita	MIMAT0000677	mmu-miR-7a-5p	Trub1	72133	ENSMUSG00000025086	-11.25
pita	MIMAT0000677	mmu-miR-7a-5p	Otud6b	72201	ENSMUSG00000040550	-11.25
pita	MIMAT0000677	mmu-miR-7a-5p	Cdh4	12561	ENSMUSG00000000305	-11.25
pita	MIMAT0000677	mmu-miR-7a-5p	Nt5dc3	103466	ENSMUSG00000054027	-11.25
pita	MIMAT0000677	mmu-miR-7a-5p	Rabgap1l	29809	ENSMUSG00000026721	-11.25
pita	MIMAT0000677	mmu-miR-7a-5p	Sod2	20656	ENSMUSG00000006818	-11.24
pita	MIMAT0000677	mmu-miR-7a-5p	Terf2	21750	ENSMUSG00000031921	-11.24
pita	MIMAT0000677	mmu-miR-7a-5p	Trpm7	58800	ENSMUSG00000027365	-11.24
pita	MIMAT0000677	mmu-miR-7a-5p	Fzd6	14368	ENSMUSG00000022297	-11.24
pita	MIMAT0000677	mmu-miR-7a-5p	Zfp710	209225	ENSMUSG00000048897	-11.24
pita	MIMAT0000677	mmu-miR-7a-5p	Stk35	67333	ENSMUSG00000037885	-11.24
pita	MIMAT0000677	mmu-miR-7a-5p	Olr1	108078	ENSMUSG00000030162	-11.24
pita	MIMAT0000677	mmu-miR-7a-5p	Cbfa2t3	12398	ENSMUSG00000006362	-11.23
pita	MIMAT0000677	mmu-miR-7a-5p	Dgkk	331374	ENSMUSG00000062393	-11.23
pita	MIMAT0000677	mmu-miR-7a-5p	Pus7l	78895	ENSMUSG00000033356	-11.23
pita	MIMAT0000677	mmu-miR-7a-5p	Atxn7l3b	382423	ENSMUSG00000074748	-11.23
pita	MIMAT0000677	mmu-miR-7a-5p	Mup20	381530	ENSMUSG00000078672	-11.23
pita	MIMAT0000677	mmu-miR-7a-5p	Ralgapa1	56784	ENSMUSG00000021027	-11.23
pita	MIMAT0000677	mmu-miR-7a-5p	Fcer1g	14127	ENSMUSG00000058715	-11.22
pita	MIMAT0000677	mmu-miR-7a-5p	Mrpl1	94061	ENSMUSG00000029486	-11.22
pita	MIMAT0000677	mmu-miR-7a-5p	Cox6a1	12861	ENSMUSG00000041697	-11.22
pita	MIMAT0000677	mmu-miR-7a-5p	Fxyd1	56188	ENSMUSG00000036570	-11.22
pita	MIMAT0000677	mmu-miR-7a-5p	Vps29	56433	ENSMUSG00000029462	-11.22
pita	MIMAT0000677	mmu-miR-7a-5p	Zfp385b	241494	ENSMUSG00000027016	-11.21
pita	MIMAT0000677	mmu-miR-7a-5p	Ecel1	13599	ENSMUSG00000026247	-11.21
pita	MIMAT0000677	mmu-miR-7a-5p	Map6d1	208158	ENSMUSG00000041205	-11.21
pita	MIMAT0000677	mmu-miR-7a-5p	Phlpp2	244650	ENSMUSG00000031732	-11.21
pita	MIMAT0000677	mmu-miR-7a-5p	Psme3	19192	ENSMUSG00000078652	-11.21
pita	MIMAT0000677	mmu-miR-7a-5p	C5ar1	12273	ENSMUSG00000049130	-11.21
pita	MIMAT0000677	mmu-miR-7a-5p	Klhl36	234796	ENSMUSG00000031828	-11.2
pita	MIMAT0000677	mmu-miR-7a-5p	Krtdap	64661	ENSMUSG00000074199	-11.19
pita	MIMAT0000677	mmu-miR-7a-5p	Zfp202	80902	ENSMUSG00000025602	-11.19
pita	MIMAT0000677	mmu-miR-7a-5p	Eps8l2	98845	ENSMUSG00000025504	-11.19
pita	MIMAT0000677	mmu-miR-7a-5p	Phf21a	192285	ENSMUSG00000058318	-11.19
pita	MIMAT0000677	mmu-miR-7a-5p	Smim14	68552	ENSMUSG00000037822	-11.19
pita	MIMAT0000677	mmu-miR-7a-5p	Xlr3a	22445	ENSMUSG00000057836	-11.18
pita	MIMAT0000677	mmu-miR-7a-5p	Kprp	433619	ENSMUSG00000059832	-11.18
pita	MIMAT0000677	mmu-miR-7a-5p	Mynn	80732	ENSMUSG00000037730	-11.18
pita	MIMAT0000677	mmu-miR-7a-5p	1700034I23Rik			-11.18
pita	MIMAT0000677	mmu-miR-7a-5p	A1cf	69865	ENSMUSG00000052595	-11.18
pita	MIMAT0000677	mmu-miR-7a-5p	Spcs3	76687	ENSMUSG00000054408	-11.17
pita	MIMAT0000677	mmu-miR-7a-5p	Trabd2b	666048	ENSMUSG00000070867	-11.17
pita	MIMAT0000677	mmu-miR-7a-5p	Lifr	16880	ENSMUSG00000054263	-11.16
pita	MIMAT0000677	mmu-miR-7a-5p	Lnp	69605	ENSMUSG00000009207	-11.16
pita	MIMAT0000677	mmu-miR-7a-5p	Scfd2	212986	ENSMUSG00000062110	-11.16
pita	MIMAT0000677	mmu-miR-7a-5p	Tbl1xr1	81004	ENSMUSG00000027630	-11.16
pita	MIMAT0000677	mmu-miR-7a-5p	Clca5	229933	ENSMUSG00000036960	-11.15
pita	MIMAT0000677	mmu-miR-7a-5p	Klf11	194655	ENSMUSG00000020653	-11.15
pita	MIMAT0000677	mmu-miR-7a-5p	Crls1	66586	ENSMUSG00000027357	-11.15
pita	MIMAT0000677	mmu-miR-7a-5p	Nr3c1	14815	ENSMUSG00000024431	-11.15
pita	MIMAT0000677	mmu-miR-7a-5p	Intu	380614	ENSMUSG00000060798	-11.15
pita	MIMAT0000677	mmu-miR-7a-5p	Foxj2	60611	ENSMUSG00000003154	-11.15
pita	MIMAT0000677	mmu-miR-7a-5p	Nfatc2ip	18020	ENSMUSG00000030722	-11.15
pita	MIMAT0000677	mmu-miR-7a-5p	Thnsl2	232078	ENSMUSG00000054474	-11.15
pita	MIMAT0000677	mmu-miR-7a-5p	Nr2c1	22025	ENSMUSG00000005897	-11.14
pita	MIMAT0000677	mmu-miR-7a-5p	Rc3h1	381305	ENSMUSG00000040423	-11.14
pita	MIMAT0000677	mmu-miR-7a-5p	Col2a1	12824	ENSMUSG00000022483	-11.13
pita	MIMAT0000677	mmu-miR-7a-5p	Pole4	66979	ENSMUSG00000030042	-11.13
pita	MIMAT0000677	mmu-miR-7a-5p	Esrrg	26381	ENSMUSG00000026610	-11.13
pita	MIMAT0000677	mmu-miR-7a-5p	Mysm1	320713	ENSMUSG00000062627	-11.13
pita	MIMAT0000677	mmu-miR-7a-5p	Invs	16348	ENSMUSG00000028344	-11.13
pita	MIMAT0000677	mmu-miR-7a-5p	Zscan22	232878	ENSMUSG00000054715	-11.13
pita	MIMAT0000677	mmu-miR-7a-5p	Irf4	16364	ENSMUSG00000021356	-11.12
pita	MIMAT0000677	mmu-miR-7a-5p	Sptlc3	228677	ENSMUSG00000039092	-11.12
pita	MIMAT0000677	mmu-miR-7a-5p	Cd99l2	171486	ENSMUSG00000035776	-11.12
pita	MIMAT0000677	mmu-miR-7a-5p	Gdpd4	233537	ENSMUSG00000035582	-11.11
pita	MIMAT0000677	mmu-miR-7a-5p	Zfp113	56314	ENSMUSG00000037007	-11.11
pita	MIMAT0000677	mmu-miR-7a-5p	Ywhaz	22631	ENSMUSG00000022285	-11.11
pita	MIMAT0000677	mmu-miR-7a-5p	Deptor	97998	ENSMUSG00000022419	-11.11
pita	MIMAT0000677	mmu-miR-7a-5p	Scn4b	399548	ENSMUSG00000046480	-11.1
pita	MIMAT0000677	mmu-miR-7a-5p	Tmem33	67878	ENSMUSG00000037720	-11.1
pita	MIMAT0000677	mmu-miR-7a-5p	Ccl9	20308	ENSMUSG00000019122	-11.1
pita	MIMAT0000677	mmu-miR-7a-5p	Aff1	17355	ENSMUSG00000029313	-11.1
pita	MIMAT0000677	mmu-miR-7a-5p	Rab3c	67295	ENSMUSG00000021700	-11.1
pita	MIMAT0000677	mmu-miR-7a-5p	Cdh5	12562	ENSMUSG00000031871	-11.09
pita	MIMAT0000677	mmu-miR-7a-5p	Med11	66172	ENSMUSG00000018923	-11.09
pita	MIMAT0000677	mmu-miR-7a-5p	Wnt10b	22410	ENSMUSG00000022996	-11.09
pita	MIMAT0000677	mmu-miR-7a-5p	Col1a2	12843	ENSMUSG00000029661	-11.09
pita	MIMAT0000677	mmu-miR-7a-5p	Mfap3	216760	ENSMUSG00000020522	-11.08
pita	MIMAT0000677	mmu-miR-7a-5p	Cnih4	98417	ENSMUSG00000062169	-11.08
pita	MIMAT0000677	mmu-miR-7a-5p	Kremen1	84035	ENSMUSG00000020393	-11.07
pita	MIMAT0000677	mmu-miR-7a-5p	Necap1	67602	ENSMUSG00000030327	-11.07
pita	MIMAT0000677	mmu-miR-7a-5p	Kcnma1	16531	ENSMUSG00000063142	-11.07
pita	MIMAT0000677	mmu-miR-7a-5p	Tfap2b	21419	ENSMUSG00000025927	-11.06
pita	MIMAT0000677	mmu-miR-7a-5p	Ppp6r3	52036	ENSMUSG00000024908	-11.06
pita	MIMAT0000677	mmu-miR-7a-5p	Ahcy	101056658	ENSMUSG00000027597	-11.06
pita	MIMAT0000677	mmu-miR-7a-5p	Ahcy	269378	ENSMUSG00000027597	-11.06
pita	MIMAT0000677	mmu-miR-7a-5p	Car10	72605	ENSMUSG00000056158	-11.06
pita	MIMAT0000677	mmu-miR-7a-5p	Cadm3	94332	ENSMUSG00000005338	-11.05
pita	MIMAT0000677	mmu-miR-7a-5p	Kifap3	16579	ENSMUSG00000026585	-11.05
pita	MIMAT0000677	mmu-miR-7a-5p	Stxbp2	20911	ENSMUSG00000004626	-11.05
pita	MIMAT0000677	mmu-miR-7a-5p	Atp8a1	11980	ENSMUSG00000037685	-11.05
pita	MIMAT0000677	mmu-miR-7a-5p	Nras	18176	ENSMUSG00000027852	-11.05
pita	MIMAT0000677	mmu-miR-7a-5p	Hpcal4	170638	ENSMUSG00000046093	-11.05
pita	MIMAT0000677	mmu-miR-7a-5p	Ntrk3	18213	ENSMUSG00000059146	-11.05
pita	MIMAT0000677	mmu-miR-7a-5p	Plaa	18786	ENSMUSG00000028577	-11.05
pita	MIMAT0000677	mmu-miR-7a-5p	Ftsj1	54632	ENSMUSG00000031171	-11.05
pita	MIMAT0000677	mmu-miR-7a-5p	Prrc1	73137	ENSMUSG00000024594	-11.05
pita	MIMAT0000677	mmu-miR-7a-5p	Mtmr11	194126	ENSMUSG00000045934	-11.04
pita	MIMAT0000677	mmu-miR-7a-5p	Tpk1	29807	ENSMUSG00000029735	-11.03
pita	MIMAT0000677	mmu-miR-7a-5p	Col14a1	12818	ENSMUSG00000022371	-11.03
pita	MIMAT0000677	mmu-miR-7a-5p	Lrrfip2	71268	ENSMUSG00000032497	-11.02
pita	MIMAT0000677	mmu-miR-7a-5p	Dnajb6	23950	ENSMUSG00000029131	-11.02
pita	MIMAT0000677	mmu-miR-7a-5p	Ube3a	22215	ENSMUSG00000025326	-11.02
pita	MIMAT0000677	mmu-miR-7a-5p	Znrf2	387524	ENSMUSG00000058446	-11.02
pita	MIMAT0000677	mmu-miR-7a-5p	Klhl13	67455	ENSMUSG00000036782	-11.02
pita	MIMAT0000677	mmu-miR-7a-5p	Tiam1	21844	ENSMUSG00000002489	-11.02
pita	MIMAT0000677	mmu-miR-7a-5p	Herc3	73998	ENSMUSG00000029804	-11.01
pita	MIMAT0000677	mmu-miR-7a-5p	Negr1	320840	ENSMUSG00000040037	-11.01
pita	MIMAT0000677	mmu-miR-7a-5p	Siglec1	20612	ENSMUSG00000027322	-11.01
pita	MIMAT0000677	mmu-miR-7a-5p	Srgap2	14270	ENSMUSG00000026425	-11
pita	MIMAT0000677	mmu-miR-7a-5p	Nfia	18027	ENSMUSG00000028565	-11
pita	MIMAT0000677	mmu-miR-7a-5p	Alox12e	11685	ENSMUSG00000018907	-11
pita	MIMAT0000677	mmu-miR-7a-5p	Stk32b	64293	ENSMUSG00000029123	-11
pita	MIMAT0000677	mmu-miR-7a-5p	Trim33	94093	ENSMUSG00000033014	-11
pita	MIMAT0000677	mmu-miR-7a-5p	Pafah1b1	18472	ENSMUSG00000020745	-11
pita	MIMAT0000677	mmu-miR-7a-5p	Spats2l	67198	ENSMUSG00000038305	-10.99
pita	MIMAT0000677	mmu-miR-7a-5p	Gphb5	217674	ENSMUSG00000048982	-10.99
pita	MIMAT0000677	mmu-miR-7a-5p	Cstf2	108062	ENSMUSG00000031256	-10.99
pita	MIMAT0000677	mmu-miR-7a-5p	Gata6	14465	ENSMUSG00000005836	-10.99
pita	MIMAT0000677	mmu-miR-7a-5p	Rragd	52187	ENSMUSG00000028278	-10.98
pita	MIMAT0000677	mmu-miR-7a-5p	Flcn	216805	ENSMUSG00000032633	-10.98
pita	MIMAT0000677	mmu-miR-7a-5p	Snca	20617	ENSMUSG00000025889	-10.98
pita	MIMAT0000677	mmu-miR-7a-5p	Pcnx	54604	ENSMUSG00000021140	-10.97
pita	MIMAT0000677	mmu-miR-7a-5p	Fgd6	13998	ENSMUSG00000020021	-10.97
pita	MIMAT0000677	mmu-miR-7a-5p	Csta	209294	ENSMUSG00000034362	-10.97
pita	MIMAT0000677	mmu-miR-7a-5p	Rnf20	109331	ENSMUSG00000028309	-10.97
pita	MIMAT0000677	mmu-miR-7a-5p	Slco1a4	28250	ENSMUSG00000030237	-10.97
pita	MIMAT0000677	mmu-miR-7a-5p	Capza1	12340	ENSMUSG00000070372	-10.96
pita	MIMAT0000677	mmu-miR-7a-5p	Igsf3	78908	ENSMUSG00000042035	-10.96
pita	MIMAT0000677	mmu-miR-7a-5p	0610007P14Rik	58520	ENSMUSG00000021252	-10.96
pita	MIMAT0000677	mmu-miR-7a-5p	Srsf10	14105	ENSMUSG00000028676	-10.95
pita	MIMAT0000677	mmu-miR-7a-5p	Phactr1	218194	ENSMUSG00000054728	-10.95
pita	MIMAT0000677	mmu-miR-7a-5p	H6pd	100198	ENSMUSG00000028980	-10.94
pita	MIMAT0000677	mmu-miR-7a-5p	Ccnb1	268697	ENSMUSG00000041431	-10.94
pita	MIMAT0000677	mmu-miR-7a-5p	H2-Eb2	381091	ENSMUSG00000067341	-10.94
pita	MIMAT0000677	mmu-miR-7a-5p	Ccnb1	101056596	ENSMUSG00000041431	-10.94
pita	MIMAT0000677	mmu-miR-7a-5p	Srcin1	56013	ENSMUSG00000038453	-10.94
pita	MIMAT0000677	mmu-miR-7a-5p	Ccnb1	434175	ENSMUSG00000041431	-10.94
pita	MIMAT0000677	mmu-miR-7a-5p	Gabpb2	213054	ENSMUSG00000038766	-10.94
pita	MIMAT0000677	mmu-miR-7a-5p	Mgat4a	269181	ENSMUSG00000026110	-10.93
pita	MIMAT0000677	mmu-miR-7a-5p	Dhrs9	241452	ENSMUSG00000027068	-10.93
pita	MIMAT0000677	mmu-miR-7a-5p	Invs	16348	ENSMUSG00000028344	-10.93
pita	MIMAT0000677	mmu-miR-7a-5p	Iws1	73473	ENSMUSG00000024384	-10.93
pita	MIMAT0000677	mmu-miR-7a-5p	Tmod2	50876	ENSMUSG00000032186	-10.93
pita	MIMAT0000677	mmu-miR-7a-5p	Birc6	12211	ENSMUSG00000024073	-10.93
pita	MIMAT0000677	mmu-miR-7a-5p	Kcnj15	16516	ENSMUSG00000062609	-10.93
pita	MIMAT0000677	mmu-miR-7a-5p	Tardbp	230908	ENSMUSG00000041459	-10.92
pita	MIMAT0000677	mmu-miR-7a-5p	Pter	19212	ENSMUSG00000026730	-10.92
pita	MIMAT0000677	mmu-miR-7a-5p	Brcc3	210766	ENSMUSG00000031201	-10.92
pita	MIMAT0000677	mmu-miR-7a-5p	Fbxw5	30839	ENSMUSG00000015095	-10.92
pita	MIMAT0000677	mmu-miR-7a-5p	Gusb	110006	ENSMUSG00000025534	-10.91
pita	MIMAT0000677	mmu-miR-7a-5p	Map2k7	26400	ENSMUSG00000002948	-10.9
pita	MIMAT0000677	mmu-miR-7a-5p	Stk32a	269019	ENSMUSG00000039954	-10.9
pita	MIMAT0000677	mmu-miR-7a-5p	Aak1	269774	ENSMUSG00000057230	-10.89
pita	MIMAT0000677	mmu-miR-7a-5p	Gpr64	237175	ENSMUSG00000031298	-10.89
pita	MIMAT0000677	mmu-miR-7a-5p	Mdm1	17245	ENSMUSG00000020212	-10.89
pita	MIMAT0000677	mmu-miR-7a-5p	Maz	17188	ENSMUSG00000030678	-10.89
pita	MIMAT0000677	mmu-miR-7a-5p	Wdr37	207615	ENSMUSG00000021147	-10.89
pita	MIMAT0000677	mmu-miR-7a-5p	Gbp5	229898	ENSMUSG00000040264	-10.89
pita	MIMAT0000677	mmu-miR-7a-5p	Bcl2l2	12050	ENSMUSG00000089682	-10.88
pita	MIMAT0000677	mmu-miR-7a-5p	Daglb	231871	ENSMUSG00000039206	-10.88
pita	MIMAT0000677	mmu-miR-7a-5p	Dzip1l	72507	ENSMUSG00000037784	-10.88
pita	MIMAT0000677	mmu-miR-7a-5p	Fam78a	241303	ENSMUSG00000050592	-10.88
pita	MIMAT0000677	mmu-miR-7a-5p	Pcdhgb1			-10.88
pita	MIMAT0000677	mmu-miR-7a-5p	Nnt			-10.88
pita	MIMAT0000677	mmu-miR-7a-5p	Eya4	14051	ENSMUSG00000010461	-10.88
pita	MIMAT0000677	mmu-miR-7a-5p	Zkscan1	74570	ENSMUSG00000029729	-10.87
pita	MIMAT0000677	mmu-miR-7a-5p	Six2	20472	ENSMUSG00000024134	-10.87
pita	MIMAT0000677	mmu-miR-7a-5p	Doc2b	13447	ENSMUSG00000020848	-10.87
pita	MIMAT0000677	mmu-miR-7a-5p	Sec22c	215474	ENSMUSG00000061536	-10.87
pita	MIMAT0000677	mmu-miR-7a-5p	Me3	109264	ENSMUSG00000030621	-10.87
pita	MIMAT0000677	mmu-miR-7a-5p	Rgs10	67865	ENSMUSG00000030844	-10.87
pita	MIMAT0000677	mmu-miR-7a-5p	Xlr3b	574437	ENSMUSG00000073125	-10.87
pita	MIMAT0000677	mmu-miR-7a-5p	Il7	16196	ENSMUSG00000040329	-10.87
pita	MIMAT0000677	mmu-miR-7a-5p	Ntrk2	18212	ENSMUSG00000055254	-10.87
pita	MIMAT0000677	mmu-miR-7a-5p	Ablim2	231148	ENSMUSG00000029095	-10.86
pita	MIMAT0000677	mmu-miR-7a-5p	Scrt1	170729	ENSMUSG00000048385	-10.86
pita	MIMAT0000677	mmu-miR-7a-5p	1110018G07Rik	68497	ENSMUSG00000042350	-10.86
pita	MIMAT0000677	mmu-miR-7a-5p	Igj	16069	ENSMUSG00000067149	-10.85
pita	MIMAT0000677	mmu-miR-7a-5p	Cdc42se2	101056447	ENSMUSG00000052298	-10.85
pita	MIMAT0000677	mmu-miR-7a-5p	Cisd2	67006	ENSMUSG00000028165	-10.85
pita	MIMAT0000677	mmu-miR-7a-5p	2310044G17Rik	217732	ENSMUSG00000034157	-10.85
pita	MIMAT0000677	mmu-miR-7a-5p	Sdr39u1	654795	ENSMUSG00000022223	-10.85
pita	MIMAT0000677	mmu-miR-7a-5p	Stard13	243362	ENSMUSG00000016128	-10.85
pita	MIMAT0000677	mmu-miR-7a-5p	Cdc42se2	72729	ENSMUSG00000052298	-10.85
pita	MIMAT0000677	mmu-miR-7a-5p	4931406B18Rik	74054	ENSMUSG00000013353	-10.85
pita	MIMAT0000677	mmu-miR-7a-5p	Trove2	20822	ENSMUSG00000018199	-10.85
pita	MIMAT0000677	mmu-miR-7a-5p	Gtpbp10	207704	ENSMUSG00000040464	-10.85
pita	MIMAT0000677	mmu-miR-7a-5p	Ptprg	19270	ENSMUSG00000021745	-10.85
pita	MIMAT0000677	mmu-miR-7a-5p	9830107B12Rik	328829	ENSMUSG00000073386	-10.84
pita	MIMAT0000677	mmu-miR-7a-5p	Zfp831	100043757	ENSMUSG00000050600	-10.84
pita	MIMAT0000677	mmu-miR-7a-5p	2010002M12Rik	112419	ENSMUSG00000067297	-10.84
pita	MIMAT0000677	mmu-miR-7a-5p	Zfp871	208292	ENSMUSG00000024298	-10.84
pita	MIMAT0000677	mmu-miR-7a-5p	Slc10a3	214601	ENSMUSG00000032806	-10.84
pita	MIMAT0000677	mmu-miR-7a-5p	Atf6	226641	ENSMUSG00000026663	-10.84
pita	MIMAT0000677	mmu-miR-7a-5p	Olfr1033	258571	ENSMUSG00000045392	-10.83
pita	MIMAT0000677	mmu-miR-7a-5p	Samd3	268288	ENSMUSG00000051354	-10.83
pita	MIMAT0000677	mmu-miR-7a-5p	Entpd7	93685	ENSMUSG00000025192	-10.83
pita	MIMAT0000677	mmu-miR-7a-5p	Serpinb9g	93806	ENSMUSG00000057726	-10.83
pita	MIMAT0000677	mmu-miR-7a-5p	Tm9sf3	107358	ENSMUSG00000025016	-10.83
pita	MIMAT0000677	mmu-miR-7a-5p	Brd1	223770	ENSMUSG00000022387	-10.83
pita	MIMAT0000677	mmu-miR-7a-5p	Rcan3	53902	ENSMUSG00000059713	-10.83
pita	MIMAT0000677	mmu-miR-7a-5p	Mpzl3	319742	ENSMUSG00000070305	-10.83
pita	MIMAT0000677	mmu-miR-7a-5p	Dscr3	13185	ENSMUSG00000022898	-10.82
pita	MIMAT0000677	mmu-miR-7a-5p	Slc9a3r1	26941	ENSMUSG00000020733	-10.81
pita	MIMAT0000677	mmu-miR-7a-5p	Gria1	14799	ENSMUSG00000020524	-10.81
pita	MIMAT0000677	mmu-miR-7a-5p	Dnajc10	66861	ENSMUSG00000027006	-10.81
pita	MIMAT0000677	mmu-miR-7a-5p	Glipr2	384009	ENSMUSG00000028480	-10.81
pita	MIMAT0000677	mmu-miR-7a-5p	Pycard	66824	ENSMUSG00000030793	-10.8
pita	MIMAT0000677	mmu-miR-7a-5p	Hook3	320191	ENSMUSG00000037234	-10.8
pita	MIMAT0000677	mmu-miR-7a-5p	Slc35d1	242585	ENSMUSG00000028521	-10.79
pita	MIMAT0000677	mmu-miR-7a-5p	Entpd7	93685	ENSMUSG00000025192	-10.79
pita	MIMAT0000677	mmu-miR-7a-5p	Mecp2	17257	ENSMUSG00000031393	-10.79
pita	MIMAT0000677	mmu-miR-7a-5p	Sox11	20666	ENSMUSG00000063632	-10.79
pita	MIMAT0000677	mmu-miR-7a-5p	Slc35d1	242585	ENSMUSG00000028521	-10.79
pita	MIMAT0000677	mmu-miR-7a-5p	Ddr1	12305	ENSMUSG00000003534	-10.79
pita	MIMAT0000677	mmu-miR-7a-5p	Slc35d1	242585	ENSMUSG00000028521	-10.79
pita	MIMAT0000677	mmu-miR-7a-5p	Slc24a2	76376	ENSMUSG00000037996	-10.79
pita	MIMAT0000677	mmu-miR-7a-5p	Ebf3	13593	ENSMUSG00000010476	-10.79
pita	MIMAT0000677	mmu-miR-7a-5p	Usp40	227334	ENSMUSG00000005501	-10.78
pita	MIMAT0000677	mmu-miR-7a-5p	Capza1	12340	ENSMUSG00000070372	-10.78
pita	MIMAT0000677	mmu-miR-7a-5p	D15Ertd621e	210998	ENSMUSG00000037119	-10.78
pita	MIMAT0000677	mmu-miR-7a-5p	Mllt11	56772	ENSMUSG00000053192	-10.78
pita	MIMAT0000677	mmu-miR-7a-5p	Adamts16	271127	ENSMUSG00000049538	-10.78
pita	MIMAT0000677	mmu-miR-7a-5p	Raver2	242570	ENSMUSG00000035275	-10.77
pita	MIMAT0000677	mmu-miR-7a-5p	Slc5a3	53881	ENSMUSG00000089774	-10.77
pita	MIMAT0000677	mmu-miR-7a-5p	Rbm33	381626	ENSMUSG00000048271	-10.76
pita	MIMAT0000677	mmu-miR-7a-5p	Prrg3	208748	ENSMUSG00000033361	-10.76
pita	MIMAT0000677	mmu-miR-7a-5p	4931406B18Rik	74054	ENSMUSG00000013353	-10.76
pita	MIMAT0000677	mmu-miR-7a-5p	BC026590	230234	ENSMUSG00000038827	-10.76
pita	MIMAT0000677	mmu-miR-7a-5p	Dctn6	22428	ENSMUSG00000031516	-10.76
pita	MIMAT0000677	mmu-miR-7a-5p	Atp5g1	11951	ENSMUSG00000006057	-10.76
pita	MIMAT0000677	mmu-miR-7a-5p	Sftpa1	20387	ENSMUSG00000021789	-10.76
pita	MIMAT0000677	mmu-miR-7a-5p	Pnma2	239157	ENSMUSG00000046204	-10.76
pita	MIMAT0000677	mmu-miR-7a-5p	Myadm	50918	ENSMUSG00000068566	-10.76
pita	MIMAT0000677	mmu-miR-7a-5p	Kcnmb2	72413	ENSMUSG00000037610	-10.75
pita	MIMAT0000677	mmu-miR-7a-5p	Rdh16	19683	ENSMUSG00000069456	-10.75
pita	MIMAT0000677	mmu-miR-7a-5p	Rpp14	67053	ENSMUSG00000023156	-10.75
pita	MIMAT0000677	mmu-miR-7a-5p	Arhgap12	75415	ENSMUSG00000041225	-10.74
pita	MIMAT0000677	mmu-miR-7a-5p	Osgepl1	72085	ENSMUSG00000026096	-10.74
pita	MIMAT0000677	mmu-miR-7a-5p	Chmp3	66700	ENSMUSG00000053119	-10.74
pita	MIMAT0000677	mmu-miR-7a-5p	Mau2	74549	ENSMUSG00000031858	-10.74
pita	MIMAT0000677	mmu-miR-7a-5p	Stk10	20868	ENSMUSG00000020272	-10.74
pita	MIMAT0000677	mmu-miR-7a-5p	Sf1	22668	ENSMUSG00000024949	-10.74
pita	MIMAT0000677	mmu-miR-7a-5p	Arl15	218639	ENSMUSG00000042348	-10.74
pita	MIMAT0000677	mmu-miR-7a-5p	Slc25a10	27376	ENSMUSG00000025792	-10.74
pita	MIMAT0000677	mmu-miR-7a-5p	Hs3st6	328779	ENSMUSG00000039628	-10.73
pita	MIMAT0000677	mmu-miR-7a-5p	Eif5b	226982	ENSMUSG00000026083	-10.73
pita	MIMAT0000677	mmu-miR-7a-5p	Rgl1	19731	ENSMUSG00000026482	-10.73
pita	MIMAT0000677	mmu-miR-7a-5p	Nfya	18044	ENSMUSG00000023994	-10.72
pita	MIMAT0000677	mmu-miR-7a-5p	Pard3	93742	ENSMUSG00000025812	-10.72
pita	MIMAT0000677	mmu-miR-7a-5p	Rnf24	51902	ENSMUSG00000048911	-10.72
pita	MIMAT0000677	mmu-miR-7a-5p	Syne1	64009	ENSMUSG00000096054	-10.72
pita	MIMAT0000677	mmu-miR-7a-5p	Sos1	20662	ENSMUSG00000024241	-10.72
pita	MIMAT0000677	mmu-miR-7a-5p	Dnmt3a	13435	ENSMUSG00000020661	-10.72
pita	MIMAT0000677	mmu-miR-7a-5p	Srprb	20818	ENSMUSG00000032553	-10.72
pita	MIMAT0000677	mmu-miR-7a-5p	Col6a4	68553	ENSMUSG00000032572	-10.72
pita	MIMAT0000677	mmu-miR-7a-5p	Fmn1	14260	ENSMUSG00000044042	-10.71
pita	MIMAT0000677	mmu-miR-7a-5p	Snn	20621	ENSMUSG00000037972	-10.71
targetscan	MIMAT0000677	mmu-miR-7a-5p	Trim16	94092	ENSMUSG00000047821	-0.479
targetscan	MIMAT0000677	mmu-miR-7a-5p	Zfp248	72720	ENSMUSG00000030145	-0.465
targetscan	MIMAT0000677	mmu-miR-7a-5p	Ghitm	66092	ENSMUSG00000041028	-0.459
targetscan	MIMAT0000677	mmu-miR-7a-5p	Zfp85-rs1	22746	ENSMUSG00000058331	-0.447
targetscan	MIMAT0000677	mmu-miR-7a-5p	Megf9	230316	ENSMUSG00000039270	-0.446
targetscan	MIMAT0000677	mmu-miR-7a-5p	Serpina12	68054	ENSMUSG00000041567	-0.441
targetscan	MIMAT0000677	mmu-miR-7a-5p	Pom121l2	195236	ENSMUSG00000016982	-0.44
targetscan	MIMAT0000677	mmu-miR-7a-5p	Spata2	263876	ENSMUSG00000047030	-0.439
targetscan	MIMAT0000677	mmu-miR-7a-5p	Rhbdd1	76867	ENSMUSG00000026142	-0.435
targetscan	MIMAT0000677	mmu-miR-7a-5p	Atg3	67841	ENSMUSG00000022663	-0.432
targetscan	MIMAT0000677	mmu-miR-7a-5p	Serpinb2	18788	ENSMUSG00000062345	-0.431
targetscan	MIMAT0000677	mmu-miR-7a-5p	Smpdl3a	57319	ENSMUSG00000019872	-0.43
targetscan	MIMAT0000677	mmu-miR-7a-5p	Trmt13	229780	ENSMUSG00000033439	-0.426
targetscan	MIMAT0000677	mmu-miR-7a-5p	Rnf141	67150	ENSMUSG00000030788	-0.425
targetscan	MIMAT0000677	mmu-miR-7a-5p	Parp1	11545	ENSMUSG00000026496	-0.422
targetscan	MIMAT0000677	mmu-miR-7a-5p	Otog	18419	ENSMUSG00000009487	-0.422
targetscan	MIMAT0000677	mmu-miR-7a-5p	Crhbp	12919	ENSMUSG00000021680	-0.419
targetscan	MIMAT0000677	mmu-miR-7a-5p	Vdac1	22333	ENSMUSG00000020402	-0.415
targetscan	MIMAT0000677	mmu-miR-7a-5p	Pan2	103135	ENSMUSG00000005682	-0.414
targetscan	MIMAT0000677	mmu-miR-7a-5p	Dhx33	216877	ENSMUSG00000040620	-0.411
targetscan	MIMAT0000677	mmu-miR-7a-5p	Rgs9	19739	ENSMUSG00000020599	-0.408
targetscan	MIMAT0000677	mmu-miR-7a-5p	Smim12	80284	ENSMUSG00000042380	-0.407
targetscan	MIMAT0000677	mmu-miR-7a-5p	Cat	12359	ENSMUSG00000027187	-0.406
targetscan	MIMAT0000677	mmu-miR-7a-5p	9430020K01Rik	240185	ENSMUSG00000033960	-0.402
targetscan	MIMAT0000677	mmu-miR-7a-5p	Bcorl1	320376	ENSMUSG00000036959	-0.402
targetscan	MIMAT0000677	mmu-miR-7a-5p	Zfp287	170740	ENSMUSG00000005267	-0.4
targetscan	MIMAT0000677	mmu-miR-7a-5p	Atp1b3	11933	ENSMUSG00000032412	-0.4
targetscan	MIMAT0000677	mmu-miR-7a-5p	Rsbn1l	242860	ENSMUSG00000039968	-0.399
targetscan	MIMAT0000677	mmu-miR-7a-5p	Emr4	52614	ENSMUSG00000032915	-0.398
targetscan	MIMAT0000677	mmu-miR-7a-5p	Ubtfl1	546118	ENSMUSG00000074502	-0.396
targetscan	MIMAT0000677	mmu-miR-7a-5p	Cd180	17079	ENSMUSG00000021624	-0.396
targetscan	MIMAT0000677	mmu-miR-7a-5p	Atp10a	11982	ENSMUSG00000025324	-0.395
targetscan	MIMAT0000677	mmu-miR-7a-5p	Zfp93	22755	ENSMUSG00000055305	-0.395
targetscan	MIMAT0000677	mmu-miR-7a-5p	Gm12185	620913	ENSMUSG00000048852	-0.395
targetscan	MIMAT0000677	mmu-miR-7a-5p	Strn3	94186	ENSMUSG00000020954	-0.395
targetscan	MIMAT0000677	mmu-miR-7a-5p	Fig4	103199	ENSMUSG00000038417	-0.393
targetscan	MIMAT0000677	mmu-miR-7a-5p	9930111J21Rik1	667214	ENSMUSG00000069893	-0.393
targetscan	MIMAT0000677	mmu-miR-7a-5p	Med17	234959	ENSMUSG00000031935	-0.392
targetscan	MIMAT0000677	mmu-miR-7a-5p	Gm17495	100126778	ENSMUSG00000090747	-0.392
targetscan	MIMAT0000677	mmu-miR-7a-5p	Gm10696	100043188	ENSMUSG00000074424	-0.39
targetscan	MIMAT0000677	mmu-miR-7a-5p	Srd5a1	78925	ENSMUSG00000021594	-0.39
targetscan	MIMAT0000677	mmu-miR-7a-5p	Mapkap1	227743	ENSMUSG00000038696	-0.386
targetscan	MIMAT0000677	mmu-miR-7a-5p	Cct4	12464	ENSMUSG00000007739	-0.385
targetscan	MIMAT0000677	mmu-miR-7a-5p	Mobp	17433	ENSMUSG00000032517	-0.385
targetscan	MIMAT0000677	mmu-miR-7a-5p	Chsy3	78923	ENSMUSG00000058152	-0.383
targetscan	MIMAT0000677	mmu-miR-7a-5p	E330021D16Rik	100502936	ENSMUSG00000045291	-0.382
targetscan	MIMAT0000677	mmu-miR-7a-5p	Oxr1	170719	ENSMUSG00000022307	-0.382
targetscan	MIMAT0000677	mmu-miR-7a-5p	Snca	20617	ENSMUSG00000025889	-0.38
targetscan	MIMAT0000677	mmu-miR-7a-5p	Il1rl1	17082	ENSMUSG00000026069	-0.378
targetscan	MIMAT0000677	mmu-miR-7a-5p	Pgm5	226041	ENSMUSG00000041731	-0.376
targetscan	MIMAT0000677	mmu-miR-7a-5p	Med19	381379	ENSMUSG00000027080	-0.373
targetscan	MIMAT0000677	mmu-miR-7a-5p	Dcstamp	75766	ENSMUSG00000022303	-0.373
targetscan	MIMAT0000677	mmu-miR-7a-5p	B3gnt6	272411	ENSMUSG00000074004	-0.372
targetscan	MIMAT0000677	mmu-miR-7a-5p	Rb1	19645	ENSMUSG00000022105	-0.37
targetscan	MIMAT0000677	mmu-miR-7a-5p	Pole4	66979	ENSMUSG00000030042	-0.368
targetscan	MIMAT0000677	mmu-miR-7a-5p	Aars2	224805	ENSMUSG00000023938	-0.368
targetscan	MIMAT0000677	mmu-miR-7a-5p	Hdlbp	110611	ENSMUSG00000034088	-0.367
targetscan	MIMAT0000677	mmu-miR-7a-5p	Ctsk	13038	ENSMUSG00000028111	-0.366
targetscan	MIMAT0000677	mmu-miR-7a-5p	Tmem123	71929	ENSMUSG00000050912	-0.365
targetscan	MIMAT0000677	mmu-miR-7a-5p	3110001I22Rik	66598	ENSMUSG00000079737	-0.364
targetscan	MIMAT0000677	mmu-miR-7a-5p	Tmem88b	320587	ENSMUSG00000073680	-0.362
targetscan	MIMAT0000677	mmu-miR-7a-5p	Dhx37	208144	ENSMUSG00000029480	-0.361
targetscan	MIMAT0000677	mmu-miR-7a-5p	Hhla1	654498	ENSMUSG00000072511	-0.361
targetscan	MIMAT0000677	mmu-miR-7a-5p	Zc3h4	330474	ENSMUSG00000059273	-0.359
targetscan	MIMAT0000677	mmu-miR-7a-5p	Eogt	101351	ENSMUSG00000035245	-0.358
targetscan	MIMAT0000677	mmu-miR-7a-5p	Dkk3	50781	ENSMUSG00000030772	-0.358
targetscan	MIMAT0000677	mmu-miR-7a-5p	Lcp1	18826	ENSMUSG00000021998	-0.358
targetscan	MIMAT0000677	mmu-miR-7a-5p	H2-Ob	15002	ENSMUSG00000041538	-0.357
targetscan	MIMAT0000677	mmu-miR-7a-5p	Apol11b	328563	ENSMUSG00000091694	-0.357
targetscan	MIMAT0000677	mmu-miR-7a-5p	Gli3	14634	ENSMUSG00000021318	-0.356
targetscan	MIMAT0000677	mmu-miR-7a-5p	Fam168a	319604	ENSMUSG00000029461	-0.355
targetscan	MIMAT0000677	mmu-miR-7a-5p	Brd1	223770	ENSMUSG00000022387	-0.354
[truncated: 286 more rows]

## Sheet: mmu-miR-10b-5p
database	mature_mirna_acc	mature_mirna_id	target_symbol	target_entrez	target_ensembl	score
diana_microt	MIMAT0000208	mmu-miR-10b-5p	Bcl2l11	12125	ENSMUSG00000027381	1
diana_microt	MIMAT0000208	mmu-miR-10b-5p	Bdnf	12064	ENSMUSG00000048482	1
diana_microt	MIMAT0000208	mmu-miR-10b-5p	Ncor2	20602	ENSMUSG00000029478	1
diana_microt	MIMAT0000208	mmu-miR-10b-5p	Zfp369	170936	ENSMUSG00000021514	0.999
diana_microt	MIMAT0000208	mmu-miR-10b-5p	Hoxa3	15400	ENSMUSG00000079560	0.999
diana_microt	MIMAT0000208	mmu-miR-10b-5p	Gata6	14465	ENSMUSG00000005836	0.999
diana_microt	MIMAT0000208	mmu-miR-10b-5p	Kpnb1	16211	ENSMUSG00000001440	0.998
diana_microt	MIMAT0000208	mmu-miR-10b-5p	Arsj	271970	ENSMUSG00000046561	0.998
diana_microt	MIMAT0000208	mmu-miR-10b-5p	Sobp	109205	ENSMUSG00000038248	0.997
diana_microt	MIMAT0000208	mmu-miR-10b-5p	Cadm2	239857	ENSMUSG00000064115	0.996
diana_microt	MIMAT0000208	mmu-miR-10b-5p	Tmem132b	208151	ENSMUSG00000070498	0.995
diana_microt	MIMAT0000208	mmu-miR-10b-5p	Rora	19883	ENSMUSG00000032238	0.995
diana_microt	MIMAT0000208	mmu-miR-10b-5p	Fign	60344	ENSMUSG00000075324	0.994
diana_microt	MIMAT0000208	mmu-miR-10b-5p	Pcdh10	18526	ENSMUSG00000049100	0.994
diana_microt	MIMAT0000208	mmu-miR-10b-5p	Tbx5	21388	ENSMUSG00000018263	0.993
diana_microt	MIMAT0000208	mmu-miR-10b-5p	Ebf2	13592	ENSMUSG00000022053	0.992
diana_microt	MIMAT0000208	mmu-miR-10b-5p	Cep350	74081	ENSMUSG00000033671	0.991
diana_microt	MIMAT0000208	mmu-miR-10b-5p	Tmod1	21916	ENSMUSG00000028328	0.991
diana_microt	MIMAT0000208	mmu-miR-10b-5p	Tfap2c	21420	ENSMUSG00000028640	0.989
diana_microt	MIMAT0000208	mmu-miR-10b-5p	Bbx	70508	ENSMUSG00000022641	0.988
diana_microt	MIMAT0000208	mmu-miR-10b-5p	Lhfpl4	269788	ENSMUSG00000042873	0.988
diana_microt	MIMAT0000208	mmu-miR-10b-5p	Elavl2	15569	ENSMUSG00000008489	0.984
diana_microt	MIMAT0000208	mmu-miR-10b-5p	Mapkbp1	26390	ENSMUSG00000033902	0.984
diana_microt	MIMAT0000208	mmu-miR-10b-5p	Cnot6	104625	ENSMUSG00000020362	0.984
diana_microt	MIMAT0000208	mmu-miR-10b-5p	Epha5	13839	ENSMUSG00000029245	0.981
diana_microt	MIMAT0000208	mmu-miR-10b-5p	Zfp827	622675	ENSMUSG00000071064	0.981
diana_microt	MIMAT0000208	mmu-miR-10b-5p	Rc3h2	319817	ENSMUSG00000075376	0.976
diana_microt	MIMAT0000208	mmu-miR-10b-5p	Nr6a1	14536	ENSMUSG00000063972	0.974
diana_microt	MIMAT0000208	mmu-miR-10b-5p	Shank3	58234	ENSMUSG00000022623	0.974
diana_microt	MIMAT0000208	mmu-miR-10b-5p	Nr4a3	18124	ENSMUSG00000028341	0.973
diana_microt	MIMAT0000208	mmu-miR-10b-5p	Camk2b	12323	ENSMUSG00000057897	0.972
diana_microt	MIMAT0000208	mmu-miR-10b-5p	Zfp367	238673	ENSMUSG00000044934	0.971
diana_microt	MIMAT0000208	mmu-miR-10b-5p	Fnbp1l	214459	ENSMUSG00000039735	0.971
diana_microt	MIMAT0000208	mmu-miR-10b-5p	Ino80d	227195	ENSMUSG00000040865	0.969
diana_microt	MIMAT0000208	mmu-miR-10b-5p	Cecr6	94047	ENSMUSG00000094626	0.968
diana_microt	MIMAT0000208	mmu-miR-10b-5p	Tenm2	23964	ENSMUSG00000049336	0.967
diana_microt	MIMAT0000208	mmu-miR-10b-5p	Prtg	235472	ENSMUSG00000036030	0.967
diana_microt	MIMAT0000208	mmu-miR-10b-5p	Trim66	330627	ENSMUSG00000031026	0.965
diana_microt	MIMAT0000208	mmu-miR-10b-5p	Trim2	80890	ENSMUSG00000027993	0.963
diana_microt	MIMAT0000208	mmu-miR-10b-5p	Gm10188		ENSMUSG00000066936	0.963
diana_microt	MIMAT0000208	mmu-miR-10b-5p	Inhbb	16324	ENSMUSG00000037035	0.962
diana_microt	MIMAT0000208	mmu-miR-10b-5p	Itgb8	320910	ENSMUSG00000025321	0.96
diana_microt	MIMAT0000208	mmu-miR-10b-5p	Hs6st2	50786	ENSMUSG00000062184	0.96
diana_microt	MIMAT0000208	mmu-miR-10b-5p	Celf2	14007	ENSMUSG00000002107	0.96
diana_microt	MIMAT0000208	mmu-miR-10b-5p	Jarid2	16468	ENSMUSG00000038518	0.959
diana_microt	MIMAT0000208	mmu-miR-10b-5p	Atad5	237877	ENSMUSG00000017550	0.957
diana_microt	MIMAT0000208	mmu-miR-10b-5p	Map3k7	26409	ENSMUSG00000028284	0.953
diana_microt	MIMAT0000208	mmu-miR-10b-5p	Creb1	12912	ENSMUSG00000025958	0.953
diana_microt	MIMAT0000208	mmu-miR-10b-5p	Tmem170b	621976	ENSMUSG00000087370	0.952
diana_microt	MIMAT0000208	mmu-miR-10b-5p	Csrnp3	77771	ENSMUSG00000044647	0.949
diana_microt	MIMAT0000208	mmu-miR-10b-5p	Glrx2	69367	ENSMUSG00000018196	0.948
diana_microt	MIMAT0000208	mmu-miR-10b-5p	Lcp2	16822	ENSMUSG00000002699	0.947
diana_microt	MIMAT0000208	mmu-miR-10b-5p	Spef2	320277	ENSMUSG00000072663	0.944
diana_microt	MIMAT0000208	mmu-miR-10b-5p	Klf11	194655	ENSMUSG00000020653	0.943
diana_microt	MIMAT0000208	mmu-miR-10b-5p	Id4	15904	ENSMUSG00000021379	0.942
diana_microt	MIMAT0000208	mmu-miR-10b-5p	E2f3	13557	ENSMUSG00000016477	0.94
diana_microt	MIMAT0000208	mmu-miR-10b-5p	Slc6a19	74338	ENSMUSG00000021565	0.939
diana_microt	MIMAT0000208	mmu-miR-10b-5p	Purg	75029	ENSMUSG00000049184	0.938
diana_microt	MIMAT0000208	mmu-miR-10b-5p	Abcb7	11306	ENSMUSG00000031333	0.937
diana_microt	MIMAT0000208	mmu-miR-10b-5p	Ercc8	71991	ENSMUSG00000021694	0.934
diana_microt	MIMAT0000208	mmu-miR-10b-5p	Sdc1	20969	ENSMUSG00000020592	0.933
diana_microt	MIMAT0000208	mmu-miR-10b-5p	Slc35g1	240660	ENSMUSG00000044026	0.932
diana_microt	MIMAT0000208	mmu-miR-10b-5p	Mycs	17870	ENSMUSG00000044597	0.93
diana_microt	MIMAT0000208	mmu-miR-10b-5p	Rprd1a	225283	ENSMUSG00000040446	0.929
diana_microt	MIMAT0000208	mmu-miR-10b-5p	Tiam1	21844	ENSMUSG00000002489	0.927
diana_microt	MIMAT0000208	mmu-miR-10b-5p	Pgm3	109785	ENSMUSG00000056131	0.923
diana_microt	MIMAT0000208	mmu-miR-10b-5p	Rnf165	225743	ENSMUSG00000025427	0.923
diana_microt	MIMAT0000208	mmu-miR-10b-5p	Cldn10	58187	ENSMUSG00000022132	0.914
diana_microt	MIMAT0000208	mmu-miR-10b-5p	Kif18a	228421	ENSMUSG00000027115	0.91
diana_microt	MIMAT0000208	mmu-miR-10b-5p	Kcnk18	332396	ENSMUSG00000040901	0.91
diana_microt	MIMAT0000208	mmu-miR-10b-5p	Yme1l1	27377	ENSMUSG00000026775	0.907
diana_microt	MIMAT0000208	mmu-miR-10b-5p	Ceacam3	384557	ENSMUSG00000053228	0.907
diana_microt	MIMAT0000208	mmu-miR-10b-5p	Dazap1	70248	ENSMUSG00000069565	0.907
diana_microt	MIMAT0000208	mmu-miR-10b-5p	E2f7	52679	ENSMUSG00000020185	0.906
diana_microt	MIMAT0000208	mmu-miR-10b-5p	Bmp2k	140780	ENSMUSG00000034663	0.905
diana_microt	MIMAT0000208	mmu-miR-10b-5p	Il1rapl1	331461	ENSMUSG00000052372	0.904
diana_microt	MIMAT0000208	mmu-miR-10b-5p	Scn3a	20269	ENSMUSG00000057182	0.904
diana_microt	MIMAT0000208	mmu-miR-10b-5p	Heg1	77446	ENSMUSG00000075254	0.903
diana_microt	MIMAT0000208	mmu-miR-10b-5p	Eri3	140546	ENSMUSG00000033423	0.901
diana_microt	MIMAT0000208	mmu-miR-10b-5p	Rtn4	68585	ENSMUSG00000020458	0.901
diana_microt	MIMAT0000208	mmu-miR-10b-5p	Rorb	225998	ENSMUSG00000036192	0.901
diana_microt	MIMAT0000208	mmu-miR-10b-5p	Mrps18c	68735	ENSMUSG00000016833	0.9
diana_microt	MIMAT0000208	mmu-miR-10b-5p	Rpl31	114641	ENSMUSG00000073702	0.897
diana_microt	MIMAT0000208	mmu-miR-10b-5p	Rpl31	665562	ENSMUSG00000073702	0.897
diana_microt	MIMAT0000208	mmu-miR-10b-5p	Rpl31	638399	ENSMUSG00000073702	0.897
diana_microt	MIMAT0000208	mmu-miR-10b-5p	Myt1l	17933	ENSMUSG00000061911	0.896
diana_microt	MIMAT0000208	mmu-miR-10b-5p	Lgalsl	216551	ENSMUSG00000042363	0.894
diana_microt	MIMAT0000208	mmu-miR-10b-5p	Gm9990		ENSMUSG00000056106	0.894
diana_microt	MIMAT0000208	mmu-miR-10b-5p	Caap1	67770	ENSMUSG00000028578	0.894
diana_microt	MIMAT0000208	mmu-miR-10b-5p	Clcc1	229725	ENSMUSG00000027884	0.891
diana_microt	MIMAT0000208	mmu-miR-10b-5p	H3f3b	667250	ENSMUSG00000016559	0.887
diana_microt	MIMAT0000208	mmu-miR-10b-5p	H3f3b	544973	ENSMUSG00000016559	0.887
diana_microt	MIMAT0000208	mmu-miR-10b-5p	Epha8	13842	ENSMUSG00000028661	0.887
diana_microt	MIMAT0000208	mmu-miR-10b-5p	H3f3b	627371	ENSMUSG00000016559	0.887
diana_microt	MIMAT0000208	mmu-miR-10b-5p	H3f3b	15081	ENSMUSG00000016559	0.887
diana_microt	MIMAT0000208	mmu-miR-10b-5p	H3f3b	101056659	ENSMUSG00000016559	0.887
diana_microt	MIMAT0000208	mmu-miR-10b-5p	Gzf1	74533	ENSMUSG00000027439	0.887
diana_microt	MIMAT0000208	mmu-miR-10b-5p	H3f3b	625328	ENSMUSG00000016559	0.887
diana_microt	MIMAT0000208	mmu-miR-10b-5p	H3f3b	15078	ENSMUSG00000016559	0.887
diana_microt	MIMAT0000208	mmu-miR-10b-5p	Rap2a	76108	ENSMUSG00000051615	0.887
diana_microt	MIMAT0000208	mmu-miR-10b-5p	Vezt	215008	ENSMUSG00000036099	0.886
diana_microt	MIMAT0000208	mmu-miR-10b-5p	Blzf1	66352	ENSMUSG00000026577	0.885
diana_microt	MIMAT0000208	mmu-miR-10b-5p	Nudt5	53893	ENSMUSG00000025817	0.885
diana_microt	MIMAT0000208	mmu-miR-10b-5p	Map3k2	26405	ENSMUSG00000024383	0.884
diana_microt	MIMAT0000208	mmu-miR-10b-5p	Kcnj5	16521	ENSMUSG00000032034	0.881
diana_microt	MIMAT0000208	mmu-miR-10b-5p	Cpne2	234577	ENSMUSG00000034361	0.875
diana_microt	MIMAT0000208	mmu-miR-10b-5p	Mlycd	56690	ENSMUSG00000074064	0.87
diana_microt	MIMAT0000208	mmu-miR-10b-5p	Nr5a2	26424	ENSMUSG00000026398	0.87
diana_microt	MIMAT0000208	mmu-miR-10b-5p	Spag9	70834	ENSMUSG00000020859	0.87
diana_microt	MIMAT0000208	mmu-miR-10b-5p	Klc2	16594	ENSMUSG00000024862	0.87
diana_microt	MIMAT0000208	mmu-miR-10b-5p	Wnt9b	22412	ENSMUSG00000018486	0.869
diana_microt	MIMAT0000208	mmu-miR-10b-5p	B3gntl1	210004	ENSMUSG00000046605	0.868
diana_microt	MIMAT0000208	mmu-miR-10b-5p	St6galnac6	50935	ENSMUSG00000026811	0.868
diana_microt	MIMAT0000208	mmu-miR-10b-5p	Epha10	230735	ENSMUSG00000028876	0.868
diana_microt	MIMAT0000208	mmu-miR-10b-5p	Rgs8	67792	ENSMUSG00000042671	0.866
diana_microt	MIMAT0000208	mmu-miR-10b-5p	Gpr174	213439	ENSMUSG00000073008	0.863
diana_microt	MIMAT0000208	mmu-miR-10b-5p	Vwc2l	320460	ENSMUSG00000045648	0.863
diana_microt	MIMAT0000208	mmu-miR-10b-5p	Fxr2	23879	ENSMUSG00000018765	0.862
diana_microt	MIMAT0000208	mmu-miR-10b-5p	Gdpgp1	269952	ENSMUSG00000050973	0.858
diana_microt	MIMAT0000208	mmu-miR-10b-5p	Cd44	12505	ENSMUSG00000005087	0.857
diana_microt	MIMAT0000208	mmu-miR-10b-5p	Irs4	16370	ENSMUSG00000054667	0.857
diana_microt	MIMAT0000208	mmu-miR-10b-5p	Setd5	72895	ENSMUSG00000034269	0.856
diana_microt	MIMAT0000208	mmu-miR-10b-5p	Sec22c	215474	ENSMUSG00000061536	0.855
diana_microt	MIMAT0000208	mmu-miR-10b-5p	Pfkfb2	18640	ENSMUSG00000026409	0.855
diana_microt	MIMAT0000208	mmu-miR-10b-5p	Pde4a	18577	ENSMUSG00000032177	0.854
diana_microt	MIMAT0000208	mmu-miR-10b-5p	Nudt11	58242	ENSMUSG00000073295	0.854
diana_microt	MIMAT0000208	mmu-miR-10b-5p	Nudt11	102954	ENSMUSG00000073295	0.854
diana_microt	MIMAT0000208	mmu-miR-10b-5p	Nop9	67842	ENSMUSG00000019297	0.854
diana_microt	MIMAT0000208	mmu-miR-10b-5p	Prkra	23992	ENSMUSG00000002731	0.851
diana_microt	MIMAT0000208	mmu-miR-10b-5p	4932414N04Rik	75721	ENSMUSG00000079324	0.85
diana_microt	MIMAT0000208	mmu-miR-10b-5p	Tnrc6b	213988	ENSMUSG00000047888	0.85
diana_microt	MIMAT0000208	mmu-miR-10b-5p	Patl1	225929	ENSMUSG00000046139	0.849
diana_microt	MIMAT0000208	mmu-miR-10b-5p	Abl2	11352	ENSMUSG00000026596	0.848
diana_microt	MIMAT0000208	mmu-miR-10b-5p	Son	20658	ENSMUSG00000022961	0.846
diana_microt	MIMAT0000208	mmu-miR-10b-5p	Cdc42bpa	226751	ENSMUSG00000026490	0.846
diana_microt	MIMAT0000208	mmu-miR-10b-5p	4930563D23Rik	75328	ENSMUSG00000051728	0.844
diana_microt	MIMAT0000208	mmu-miR-10b-5p	Sbno1	243272	ENSMUSG00000038095	0.842
diana_microt	MIMAT0000208	mmu-miR-10b-5p	Srsf1	110809	ENSMUSG00000018379	0.839
diana_microt	MIMAT0000208	mmu-miR-10b-5p	Calcr	12311	ENSMUSG00000023964	0.838
diana_microt	MIMAT0000208	mmu-miR-10b-5p	C77370	245555	ENSMUSG00000046449	0.837
diana_microt	MIMAT0000208	mmu-miR-10b-5p	Ahsa2	268390	ENSMUSG00000020288	0.837
diana_microt	MIMAT0000208	mmu-miR-10b-5p	Atl3	109168	ENSMUSG00000024759	0.837
diana_microt	MIMAT0000208	mmu-miR-10b-5p	Gart	14450	ENSMUSG00000022962	0.836
diana_microt	MIMAT0000208	mmu-miR-10b-5p	Klf7	93691	ENSMUSG00000025959	0.836
diana_microt	MIMAT0000208	mmu-miR-10b-5p	Zmynd11	66505	ENSMUSG00000021156	0.833
diana_microt	MIMAT0000208	mmu-miR-10b-5p	Esrrg	26381	ENSMUSG00000026610	0.829
diana_microt	MIMAT0000208	mmu-miR-10b-5p	Dhfr	13361	ENSMUSG00000021707	0.828
diana_microt	MIMAT0000208	mmu-miR-10b-5p	Grin3a	242443	ENSMUSG00000039579	0.828
diana_microt	MIMAT0000208	mmu-miR-10b-5p	Phf10	72057	ENSMUSG00000023883	0.828
diana_microt	MIMAT0000208	mmu-miR-10b-5p	Hoxd10	15430	ENSMUSG00000050368	0.827
diana_microt	MIMAT0000208	mmu-miR-10b-5p	Has3	15118	ENSMUSG00000031910	0.827
diana_microt	MIMAT0000208	mmu-miR-10b-5p	Nudt8	66387	ENSMUSG00000024869	0.826
diana_microt	MIMAT0000208	mmu-miR-10b-5p	Nup50	18141	ENSMUSG00000016619	0.824
diana_microt	MIMAT0000208	mmu-miR-10b-5p	Bcl2	12043	ENSMUSG00000057329	0.824
diana_microt	MIMAT0000208	mmu-miR-10b-5p	Zfp111	56707	ENSMUSG00000087598	0.821
diana_microt	MIMAT0000208	mmu-miR-10b-5p	Slc25a2	83885	ENSMUSG00000050304	0.82
diana_microt	MIMAT0000208	mmu-miR-10b-5p	Fcrla	98752	ENSMUSG00000038421	0.82
diana_microt	MIMAT0000208	mmu-miR-10b-5p	Anapc16	52717	ENSMUSG00000020107	0.819
diana_microt	MIMAT0000208	mmu-miR-10b-5p	Gpcpd1	74182	ENSMUSG00000027346	0.815
diana_microt	MIMAT0000208	mmu-miR-10b-5p	Tex10	269536	ENSMUSG00000028345	0.815
diana_microt	MIMAT0000208	mmu-miR-10b-5p	Cdk8	264064	ENSMUSG00000029635	0.814
diana_microt	MIMAT0000208	mmu-miR-10b-5p	Cyb5d2	192986	ENSMUSG00000057778	0.813
diana_microt	MIMAT0000208	mmu-miR-10b-5p	Akap5	238276	ENSMUSG00000021057	0.812
diana_microt	MIMAT0000208	mmu-miR-10b-5p	Atf2	100047997	ENSMUSG00000027104	0.808
diana_microt	MIMAT0000208	mmu-miR-10b-5p	Atf2	11909	ENSMUSG00000027104	0.808
diana_microt	MIMAT0000208	mmu-miR-10b-5p	C330027C09Rik	224171	ENSMUSG00000033031	0.808
diana_microt	MIMAT0000208	mmu-miR-10b-5p	Osbpl1a	64291	ENSMUSG00000044252	0.807
diana_microt	MIMAT0000208	mmu-miR-10b-5p	Niacr1	80885	ENSMUSG00000045502	0.805
diana_microt	MIMAT0000208	mmu-miR-10b-5p	Tmem251	320351	ENSMUSG00000046675	0.804
diana_microt	MIMAT0000208	mmu-miR-10b-5p	Alx3	11694	ENSMUSG00000014603	0.803
diana_microt	MIMAT0000208	mmu-miR-10b-5p	Wipf1	215280	ENSMUSG00000075284	0.802
diana_microt	MIMAT0000208	mmu-miR-10b-5p	Rybp	56353	ENSMUSG00000072872	0.801
diana_microt	MIMAT0000208	mmu-miR-10b-5p	Ank3	11735	ENSMUSG00000069601	0.801
diana_microt	MIMAT0000208	mmu-miR-10b-5p	Rybp	628746	ENSMUSG00000072872	0.801
diana_microt	MIMAT0000208	mmu-miR-10b-5p	Arhgap12	75415	ENSMUSG00000041225	0.8
diana_microt	MIMAT0000208	mmu-miR-10b-5p	Ash2l	23808	ENSMUSG00000031575	0.799
diana_microt	MIMAT0000208	mmu-miR-10b-5p	Zfp534	100503584	ENSMUSG00000062518	0.798
diana_microt	MIMAT0000208	mmu-miR-10b-5p	Tmprss5	80893	ENSMUSG00000032268	0.798
diana_microt	MIMAT0000208	mmu-miR-10b-5p	Mtf1	17764	ENSMUSG00000028890	0.795
diana_microt	MIMAT0000208	mmu-miR-10b-5p	Dbndd2	52840	ENSMUSG00000017734	0.794
diana_microt	MIMAT0000208	mmu-miR-10b-5p	Gpr26	233919	ENSMUSG00000040125	0.792
diana_microt	MIMAT0000208	mmu-miR-10b-5p	Zfp784	654801	ENSMUSG00000043290	0.789
diana_microt	MIMAT0000208	mmu-miR-10b-5p	Foxi1	14233	ENSMUSG00000047861	0.789
diana_microt	MIMAT0000208	mmu-miR-10b-5p	Epb4.1l4b	54357	ENSMUSG00000028434	0.787
diana_microt	MIMAT0000208	mmu-miR-10b-5p	Mybl1	17864	ENSMUSG00000025912	0.786
diana_microt	MIMAT0000208	mmu-miR-10b-5p	Usp12	22217	ENSMUSG00000029640	0.786
diana_microt	MIMAT0000208	mmu-miR-10b-5p	Nr2f2	11819	ENSMUSG00000030551	0.786
diana_microt	MIMAT0000208	mmu-miR-10b-5p	Glt8d2	74782	ENSMUSG00000020251	0.785
diana_microt	MIMAT0000208	mmu-miR-10b-5p	Zfp687	78266	ENSMUSG00000019338	0.781
diana_microt	MIMAT0000208	mmu-miR-10b-5p	Papd5	214627	ENSMUSG00000036779	0.78
diana_microt	MIMAT0000208	mmu-miR-10b-5p	Bach2	12014	ENSMUSG00000040270	0.779
diana_microt	MIMAT0000208	mmu-miR-10b-5p	Fbxo30	71865	ENSMUSG00000047648	0.779
diana_microt	MIMAT0000208	mmu-miR-10b-5p	Ube2z	268470	ENSMUSG00000014349	0.778
diana_microt	MIMAT0000208	mmu-miR-10b-5p	Ppil4	67418	ENSMUSG00000015757	0.778
diana_microt	MIMAT0000208	mmu-miR-10b-5p	Crxos1	546024	ENSMUSG00000074365	0.778
diana_microt	MIMAT0000208	mmu-miR-10b-5p	Arl14epl	381142	ENSMUSG00000073568	0.777
diana_microt	MIMAT0000208	mmu-miR-10b-5p	Ccpg1	72278	ENSMUSG00000034563	0.777
diana_microt	MIMAT0000208	mmu-miR-10b-5p	Strn	268980	ENSMUSG00000024077	0.776
diana_microt	MIMAT0000208	mmu-miR-10b-5p	Stk4	58231	ENSMUSG00000018209	0.775
diana_microt	MIMAT0000208	mmu-miR-10b-5p	Bora	77744	ENSMUSG00000022070	0.773
diana_microt	MIMAT0000208	mmu-miR-10b-5p	Igsf1	209268	ENSMUSG00000031111	0.773
diana_microt	MIMAT0000208	mmu-miR-10b-5p	Mars2	212679	ENSMUSG00000046994	0.772
diana_microt	MIMAT0000208	mmu-miR-10b-5p	Ubxn7	224111	ENSMUSG00000053774	0.771
diana_microt	MIMAT0000208	mmu-miR-10b-5p	Ap3m1	55946	ENSMUSG00000021824	0.77
diana_microt	MIMAT0000208	mmu-miR-10b-5p	Prf1	18646	ENSMUSG00000037202	0.77
diana_microt	MIMAT0000208	mmu-miR-10b-5p	Pias1	56469	ENSMUSG00000032405	0.769
diana_microt	MIMAT0000208	mmu-miR-10b-5p	Gtf2e1	74197	ENSMUSG00000022828	0.767
diana_microt	MIMAT0000208	mmu-miR-10b-5p	Fbxl14	101358	ENSMUSG00000030019	0.767
diana_microt	MIMAT0000208	mmu-miR-10b-5p	Usp45	77593	ENSMUSG00000040455	0.766
diana_microt	MIMAT0000208	mmu-miR-10b-5p	Klf4	16600	ENSMUSG00000003032	0.765
diana_microt	MIMAT0000208	mmu-miR-10b-5p	Chrnb4	108015	ENSMUSG00000035200	0.763
diana_microt	MIMAT0000208	mmu-miR-10b-5p	Cyhr1	54151	ENSMUSG00000053929	0.763
microcosm	MIMAT0000208	mmu-miR-10b-5p	Tnni3k	435766	ENSMUSG00000040086	20.5712
microcosm	MIMAT0000208	mmu-miR-10b-5p	C4b	675521	ENSMUSG00000073418	20.2505
microcosm	MIMAT0000208	mmu-miR-10b-5p	C4b	12268	ENSMUSG00000073418	20.2505
microcosm	MIMAT0000208	mmu-miR-10b-5p	C4a		ENSMUSG00000015451	19.6849
microcosm	MIMAT0000208	mmu-miR-10b-5p	Ndufb5	66046	ENSMUSG00000027673	19.5334
microcosm	MIMAT0000208	mmu-miR-10b-5p	Tyrobp	22177	ENSMUSG00000030579	19.2323
microcosm	MIMAT0000208	mmu-miR-10b-5p	Prf1	18646	ENSMUSG00000037202	18.6761
microcosm	MIMAT0000208	mmu-miR-10b-5p	Hsd17b1	15485	ENSMUSG00000019301	18.6667
microcosm	MIMAT0000208	mmu-miR-10b-5p	Galr2	14428	ENSMUSG00000020793	18.4404
microcosm	MIMAT0000208	mmu-miR-10b-5p	Pou2f1	18986	ENSMUSG00000026565	18.3273
microcosm	MIMAT0000208	mmu-miR-10b-5p	Prkra	23992	ENSMUSG00000002731	18.2944
microcosm	MIMAT0000208	mmu-miR-10b-5p	ENSMUSG00000043225			18.0824
microcosm	MIMAT0000208	mmu-miR-10b-5p	Pank2	74450	ENSMUSG00000037514	18.0074
microcosm	MIMAT0000208	mmu-miR-10b-5p	Eepd1	67484	ENSMUSG00000036611	17.9949
microcosm	MIMAT0000208	mmu-miR-10b-5p	Rbms3	207181	ENSMUSG00000039607	17.9863
microcosm	MIMAT0000208	mmu-miR-10b-5p	4930451C15Rik	74685	ENSMUSG00000022759	17.9826
microcosm	MIMAT0000208	mmu-miR-10b-5p	Rnps1	19826	ENSMUSG00000034681	17.8564
microcosm	MIMAT0000208	mmu-miR-10b-5p	Shroom1	71774	ENSMUSG00000018387	17.8301
microcosm	MIMAT0000208	mmu-miR-10b-5p	Immt	76614	ENSMUSG00000052337	17.8265
microcosm	MIMAT0000208	mmu-miR-10b-5p	Wdr52	212517	ENSMUSG00000071550	17.7869
microcosm	MIMAT0000208	mmu-miR-10b-5p	Lcp2	16822	ENSMUSG00000002699	17.7776
microcosm	MIMAT0000208	mmu-miR-10b-5p	Dus3l	224907	ENSMUSG00000007603	17.7616
microcosm	MIMAT0000208	mmu-miR-10b-5p	Immt	76614	ENSMUSG00000052337	17.7602
microcosm	MIMAT0000208	mmu-miR-10b-5p	Olfr660			17.7012
microcosm	MIMAT0000208	mmu-miR-10b-5p	Bora	77744	ENSMUSG00000022070	17.6991
microcosm	MIMAT0000208	mmu-miR-10b-5p	Gm973	381260	ENSMUSG00000047361	17.6238
microcosm	MIMAT0000208	mmu-miR-10b-5p	Rpl31	665562	ENSMUSG00000073702	17.5382
microcosm	MIMAT0000208	mmu-miR-10b-5p	Rpl31	638399	ENSMUSG00000073702	17.5382
microcosm	MIMAT0000208	mmu-miR-10b-5p	Rpl31	114641	ENSMUSG00000073702	17.5382
microcosm	MIMAT0000208	mmu-miR-10b-5p	Ring1	19763	ENSMUSG00000024325	17.5354
microcosm	MIMAT0000208	mmu-miR-10b-5p	Slc22a22	210463	ENSMUSG00000022366	17.5354
microcosm	MIMAT0000208	mmu-miR-10b-5p	Vwa5b2	328643	ENSMUSG00000046613	17.5234
microcosm	MIMAT0000208	mmu-miR-10b-5p	Mlycd	56690	ENSMUSG00000074064	17.5117
microcosm	MIMAT0000208	mmu-miR-10b-5p	Map2k6	26399	ENSMUSG00000020623	17.5094
microcosm	MIMAT0000208	mmu-miR-10b-5p	Ighv1-82		ENSMUSG00000095127	17.499
microcosm	MIMAT0000208	mmu-miR-10b-5p	Ighv1-80		ENSMUSG00000094075	17.4893
miranda	MIMAT0000208	mmu-miR-10b-5p	Bdnf	12064	ENSMUSG00000048482	-1.3252
miranda	MIMAT0000208	mmu-miR-10b-5p	Patl1	225929	ENSMUSG00000046139	-1.3235
miranda	MIMAT0000208	mmu-miR-10b-5p	Slc12a1	20495	ENSMUSG00000027202	-1.3194
miranda	MIMAT0000208	mmu-miR-10b-5p	Etaa1	68145	ENSMUSG00000016984	-1.3103
miranda	MIMAT0000208	mmu-miR-10b-5p	Son	20658	ENSMUSG00000022961	-1.3069
miranda	MIMAT0000208	mmu-miR-10b-5p	Son	20658	ENSMUSG00000022961	-1.3005
miranda	MIMAT0000208	mmu-miR-10b-5p	Galnt1	14423	ENSMUSG00000000420	-1.2934
miranda	MIMAT0000208	mmu-miR-10b-5p	Kif18a	228421	ENSMUSG00000027115	-1.2912
miranda	MIMAT0000208	mmu-miR-10b-5p	Grb10	14783	ENSMUSG00000020176	-1.2822
miranda	MIMAT0000208	mmu-miR-10b-5p	Zfp64	22722	ENSMUSG00000027551	-1.2716
miranda	MIMAT0000208	mmu-miR-10b-5p	Gata6	14465	ENSMUSG00000005836	-1.2695
miranda	MIMAT0000208	mmu-miR-10b-5p	Ebf2	13592	ENSMUSG00000022053	-1.2631
miranda	MIMAT0000208	mmu-miR-10b-5p	Ufl1	67490	ENSMUSG00000040359	-1.2611
miranda	MIMAT0000208	mmu-miR-10b-5p	Ranbp17	66011	ENSMUSG00000040594	-1.261
miranda	MIMAT0000208	mmu-miR-10b-5p	Cpsf6	432508	ENSMUSG00000055531	-1.2582
miranda	MIMAT0000208	mmu-miR-10b-5p	Hoxa3	15400	ENSMUSG00000079560	-1.2552
miranda	MIMAT0000208	mmu-miR-10b-5p	Hs6st2	50786	ENSMUSG00000062184	-1.2521
miranda	MIMAT0000208	mmu-miR-10b-5p	Son	20658	ENSMUSG00000022961	-1.2514
miranda	MIMAT0000208	mmu-miR-10b-5p	Son	20658	ENSMUSG00000022961	-1.2391
miranda	MIMAT0000208	mmu-miR-10b-5p	Sgpp1	81535	ENSMUSG00000021054	-1.234
miranda	MIMAT0000208	mmu-miR-10b-5p	Unc80	329178	ENSMUSG00000055567	-1.2267
miranda	MIMAT0000208	mmu-miR-10b-5p	Lmna	16905	ENSMUSG00000028063	-1.2145
miranda	MIMAT0000208	mmu-miR-10b-5p	Cep68	216543	ENSMUSG00000044066	-1.2138
miranda	MIMAT0000208	mmu-miR-10b-5p	Sele	20339	ENSMUSG00000026582	-1.2036
miranda	MIMAT0000208	mmu-miR-10b-5p	Arsj	271970	ENSMUSG00000046561	-1.2005
miranda	MIMAT0000208	mmu-miR-10b-5p	Mrps18c	68735	ENSMUSG00000016833	-1.2
miranda	MIMAT0000208	mmu-miR-10b-5p	Ndnl2	66647	ENSMUSG00000070520	-1.1921
miranda	MIMAT0000208	mmu-miR-10b-5p	Pprc1	226169	ENSMUSG00000055491	-1.192
miranda	MIMAT0000208	mmu-miR-10b-5p	Pot1a	101185	ENSMUSG00000029676	-1.1885
miranda	MIMAT0000208	mmu-miR-10b-5p	St18	240690	ENSMUSG00000033740	-1.1844
miranda	MIMAT0000208	mmu-miR-10b-5p	Entpd6	12497	ENSMUSG00000033068	-1.1821
miranda	MIMAT0000208	mmu-miR-10b-5p	Cep170	545389	ENSMUSG00000057335	-1.1792
miranda	MIMAT0000208	mmu-miR-10b-5p	Dazap1	70248	ENSMUSG00000069565	-1.1764
miranda	MIMAT0000208	mmu-miR-10b-5p	Epha5	13839	ENSMUSG00000029245	-1.1749
miranda	MIMAT0000208	mmu-miR-10b-5p	Dsel	319901	ENSMUSG00000038702	-1.1707
miranda	MIMAT0000208	mmu-miR-10b-5p	Mybl1	17864	ENSMUSG00000025912	-1.1703
miranda	MIMAT0000208	mmu-miR-10b-5p	Stk24	223255	ENSMUSG00000063410	-1.1664
miranda	MIMAT0000208	mmu-miR-10b-5p	Clcc1	229725	ENSMUSG00000027884	-1.1609
miranda	MIMAT0000208	mmu-miR-10b-5p	Hnrpdl	50926	ENSMUSG00000029328	-1.1562
miranda	MIMAT0000208	mmu-miR-10b-5p	Airn	104103		-1.1549
miranda	MIMAT0000208	mmu-miR-10b-5p	Ncor2	20602	ENSMUSG00000029478	-1.1543
miranda	MIMAT0000208	mmu-miR-10b-5p	Stradb	227154	ENSMUSG00000026027	-1.154
miranda	MIMAT0000208	mmu-miR-10b-5p	Purg	75029	ENSMUSG00000049184	-1.1533
miranda	MIMAT0000208	mmu-miR-10b-5p	Pot1a	101185	ENSMUSG00000029676	-1.1503
miranda	MIMAT0000208	mmu-miR-10b-5p	1700109I08Rik	73591		-1.1495
miranda	MIMAT0000208	mmu-miR-10b-5p	Cops2	12848	ENSMUSG00000027206	-1.1468
miranda	MIMAT0000208	mmu-miR-10b-5p	Spag8	433700	ENSMUSG00000066196	-1.1448
miranda	MIMAT0000208	mmu-miR-10b-5p	Fign	60344	ENSMUSG00000075324	-1.1382
miranda	MIMAT0000208	mmu-miR-10b-5p	Tmem150c	231503	ENSMUSG00000050640	-1.1381
miranda	MIMAT0000208	mmu-miR-10b-5p	Pdgfc	54635	ENSMUSG00000028019	-1.1344
miranda	MIMAT0000208	mmu-miR-10b-5p	C4a	625018		-1.1306
miranda	MIMAT0000208	mmu-miR-10b-5p	C4b	12268	ENSMUSG00000073418	-1.1306
miranda	MIMAT0000208	mmu-miR-10b-5p	Tmem150c	231503	ENSMUSG00000050640	-1.13
miranda	MIMAT0000208	mmu-miR-10b-5p	Mdm2	17246	ENSMUSG00000020184	-1.1224
miranda	MIMAT0000208	mmu-miR-10b-5p	Caap1	67770	ENSMUSG00000028578	-1.1217
miranda	MIMAT0000208	mmu-miR-10b-5p	Mageb4	434903	ENSMUSG00000035427	-1.1189
miranda	MIMAT0000208	mmu-miR-10b-5p	Gpr174	213439	ENSMUSG00000073008	-1.117
miranda	MIMAT0000208	mmu-miR-10b-5p	Klhl29	208439	ENSMUSG00000020627	-1.115
miranda	MIMAT0000208	mmu-miR-10b-5p	Sobp	109205	ENSMUSG00000038248	-1.1131
miranda	MIMAT0000208	mmu-miR-10b-5p	Id4	15904	ENSMUSG00000021379	-1.1122
miranda	MIMAT0000208	mmu-miR-10b-5p	Tmprss11a	194597	ENSMUSG00000072845	-1.1094
miranda	MIMAT0000208	mmu-miR-10b-5p	Hoxb3	15410	ENSMUSG00000048763	-1.1051
miranda	MIMAT0000208	mmu-miR-10b-5p	Pot1a	101185	ENSMUSG00000029676	-1.1009
miranda	MIMAT0000208	mmu-miR-10b-5p	Gpr22	73010	ENSMUSG00000044067	-1.0908
miranda	MIMAT0000208	mmu-miR-10b-5p	Wfdc5	209232	ENSMUSG00000040154	-1.0868
miranda	MIMAT0000208	mmu-miR-10b-5p	Syne1	64009	ENSMUSG00000096054	-1.0862
miranda	MIMAT0000208	mmu-miR-10b-5p	Syne1	64009	ENSMUSG00000019769	-1.0862
miranda	MIMAT0000208	mmu-miR-10b-5p	Elmo1	140580	ENSMUSG00000041112	-1.0856
miranda	MIMAT0000208	mmu-miR-10b-5p	Cd44	12505	ENSMUSG00000005087	-1.0846
miranda	MIMAT0000208	mmu-miR-10b-5p	Klf4	16600	ENSMUSG00000003032	-1.0822
miranda	MIMAT0000208	mmu-miR-10b-5p	Wdr35	74682	ENSMUSG00000066643	-1.081
miranda	MIMAT0000208	mmu-miR-10b-5p	Pot1a	101185	ENSMUSG00000029676	-1.0781
miranda	MIMAT0000208	mmu-miR-10b-5p	5830417I10Rik	100302730		-1.0777
miranda	MIMAT0000208	mmu-miR-10b-5p	Kbtbd8	243574	ENSMUSG00000030031	-1.0757
miranda	MIMAT0000208	mmu-miR-10b-5p	Npas3	27386	ENSMUSG00000021010	-1.075
miranda	MIMAT0000208	mmu-miR-10b-5p	A230051N06Rik	320593		-1.0741
miranda	MIMAT0000208	mmu-miR-10b-5p	Kctd16	383348	ENSMUSG00000051401	-1.0734
miranda	MIMAT0000208	mmu-miR-10b-5p	Camta1	100072	ENSMUSG00000014592	-1.072
miranda	MIMAT0000208	mmu-miR-10b-5p	Gm13242	100041379	ENSMUSG00000058186	-1.0718
miranda	MIMAT0000208	mmu-miR-10b-5p	Lgr5	14160	ENSMUSG00000020140	-1.0714
miranda	MIMAT0000208	mmu-miR-10b-5p	Atad5	237877	ENSMUSG00000017550	-1.0707
miranda	MIMAT0000208	mmu-miR-10b-5p	Idh3a	67834	ENSMUSG00000032279	-1.0707
miranda	MIMAT0000208	mmu-miR-10b-5p	Herc1	235439	ENSMUSG00000038664	-1.0703
miranda	MIMAT0000208	mmu-miR-10b-5p	Dock11	75974	ENSMUSG00000031093	-1.07
miranda	MIMAT0000208	mmu-miR-10b-5p	Gm13749	433315		-1.0685
miranda	MIMAT0000208	mmu-miR-10b-5p	Pot1a	101185	ENSMUSG00000029676	-1.0683
miranda	MIMAT0000208	mmu-miR-10b-5p	Camta1	100072	ENSMUSG00000014592	-1.0667
miranda	MIMAT0000208	mmu-miR-10b-5p	Psd3	234353	ENSMUSG00000030465	-1.0658
miranda	MIMAT0000208	mmu-miR-10b-5p	Cyth1	19157	ENSMUSG00000017132	-1.062
miranda	MIMAT0000208	mmu-miR-10b-5p	Sycp2	320558	ENSMUSG00000060445	-1.0579
miranda	MIMAT0000208	mmu-miR-10b-5p	Dmxl2	235380	ENSMUSG00000041268	-1.0555
miranda	MIMAT0000208	mmu-miR-10b-5p	Yes1	22612	ENSMUSG00000014932	-1.0548
miranda	MIMAT0000208	mmu-miR-10b-5p	Ctsl	13039	ENSMUSG00000021477	-1.0523
miranda	MIMAT0000208	mmu-miR-10b-5p	Tut1	70044	ENSMUSG00000071645	-1.046
miranda	MIMAT0000208	mmu-miR-10b-5p	Fcrla	98752	ENSMUSG00000038421	-1.0459
miranda	MIMAT0000208	mmu-miR-10b-5p	Ash2l	23808	ENSMUSG00000031575	-1.0451
miranda	MIMAT0000208	mmu-miR-10b-5p	Asf1a	66403	ENSMUSG00000019857	-1.0353
miranda	MIMAT0000208	mmu-miR-10b-5p	Ctla4	12477	ENSMUSG00000026011	-1.0334
miranda	MIMAT0000208	mmu-miR-10b-5p	Rpgrip1	77945	ENSMUSG00000057132	-1.0295
miranda	MIMAT0000208	mmu-miR-10b-5p	Vezt	215008	ENSMUSG00000036099	-1.0209
miranda	MIMAT0000208	mmu-miR-10b-5p	Serpinb7	116872	ENSMUSG00000067001	-1.0203
miranda	MIMAT0000208	mmu-miR-10b-5p	Klf11	194655	ENSMUSG00000020653	-1.0189
miranda	MIMAT0000208	mmu-miR-10b-5p	Snx29	74478	ENSMUSG00000071669	-1.017
miranda	MIMAT0000208	mmu-miR-10b-5p	Kng1	16644	ENSMUSG00000022875	-1.0081
miranda	MIMAT0000208	mmu-miR-10b-5p	Rex2	19715		-1.006
miranda	MIMAT0000208	mmu-miR-10b-5p	Slc35g1	240660	ENSMUSG00000044026	-1.0059
miranda	MIMAT0000208	mmu-miR-10b-5p	Fxr2	23879	ENSMUSG00000018765	-1.0056
miranda	MIMAT0000208	mmu-miR-10b-5p	Cep170	545389	ENSMUSG00000057335	-1.0055
miranda	MIMAT0000208	mmu-miR-10b-5p	Ibsp	15891	ENSMUSG00000029306	-1.004
miranda	MIMAT0000208	mmu-miR-10b-5p	Gtf2e1	74197	ENSMUSG00000022828	-1.0012
miranda	MIMAT0000208	mmu-miR-10b-5p	BC025446	223631		-1
miranda	MIMAT0000208	mmu-miR-10b-5p	H3f3b	15081	ENSMUSG00000016559	-0.9972
miranda	MIMAT0000208	mmu-miR-10b-5p	H3f3a	15081	ENSMUSG00000060743	-0.9972
miranda	MIMAT0000208	mmu-miR-10b-5p	Atf2	11909	ENSMUSG00000027104	-0.9956
miranda	MIMAT0000208	mmu-miR-10b-5p	Osbpl1a	64291	ENSMUSG00000044252	-0.9945
miranda	MIMAT0000208	mmu-miR-10b-5p	Rem1	19700	ENSMUSG00000000359	-0.9944
miranda	MIMAT0000208	mmu-miR-10b-5p	Pgm3	109785	ENSMUSG00000056131	-0.9936
miranda	MIMAT0000208	mmu-miR-10b-5p	Ormdl1	227102	ENSMUSG00000026097	-0.9929
miranda	MIMAT0000208	mmu-miR-10b-5p	Tmem215	320500	ENSMUSG00000046593	-0.9926
miranda	MIMAT0000208	mmu-miR-10b-5p	Aldoart2	79459	ENSMUSG00000063129	-0.9903
miranda	MIMAT0000208	mmu-miR-10b-5p	Tenm2	23964	ENSMUSG00000049336	-0.9901
miranda	MIMAT0000208	mmu-miR-10b-5p	Rex2	19715		-0.9883
miranda	MIMAT0000208	mmu-miR-10b-5p	Zfp384	269800	ENSMUSG00000038346	-0.9874
miranda	MIMAT0000208	mmu-miR-10b-5p	Usp46	69727	ENSMUSG00000054814	-0.9861
miranda	MIMAT0000208	mmu-miR-10b-5p	C4a	625018		-0.9847
miranda	MIMAT0000208	mmu-miR-10b-5p	Niacr1	80885	ENSMUSG00000045502	-0.9839
miranda	MIMAT0000208	mmu-miR-10b-5p	Mcm5	17218	ENSMUSG00000005410	-0.9834
miranda	MIMAT0000208	mmu-miR-10b-5p	Kctd16	383348	ENSMUSG00000051401	-0.9813
miranda	MIMAT0000208	mmu-miR-10b-5p	Umodl1	52020	ENSMUSG00000054134	-0.9804
miranda	MIMAT0000208	mmu-miR-10b-5p	Tnfrsf19	29820	ENSMUSG00000060548	-0.9788
miranda	MIMAT0000208	mmu-miR-10b-5p	Rnf43	207742	ENSMUSG00000034177	-0.9747
miranda	MIMAT0000208	mmu-miR-10b-5p	3230401D17Rik	66680	ENSMUSG00000035399	-0.9733
miranda	MIMAT0000208	mmu-miR-10b-5p	Kctd16	383348	ENSMUSG00000051401	-0.9692
miranda	MIMAT0000208	mmu-miR-10b-5p	Mtf2	17765	ENSMUSG00000029267	-0.9675
miranda	MIMAT0000208	mmu-miR-10b-5p	3010001F23Rik	75693		-0.9641
miranda	MIMAT0000208	mmu-miR-10b-5p	Smap1	98366	ENSMUSG00000026155	-0.9619
miranda	MIMAT0000208	mmu-miR-10b-5p	Rbm48	269623	ENSMUSG00000040302	-0.9596
miranda	MIMAT0000208	mmu-miR-10b-5p	Klhl14	225266	ENSMUSG00000042514	-0.9588
miranda	MIMAT0000208	mmu-miR-10b-5p	Psmf1	228769	ENSMUSG00000032869	-0.9533
miranda	MIMAT0000208	mmu-miR-10b-5p	4930506M07Rik	71653	ENSMUSG00000041362	-0.9524
miranda	MIMAT0000208	mmu-miR-10b-5p	Ctla4	12477	ENSMUSG00000026011	-0.9518
mirdb	MIMAT0000208	mmu-miR-10b-5p	Bdnf	12064	ENSMUSG00000048482	86.1458
mirdb	MIMAT0000208	mmu-miR-10b-5p	Map3k7	26409	ENSMUSG00000028284	84.3352
mirdb	MIMAT0000208	mmu-miR-10b-5p	Rb1cc1	12421	ENSMUSG00000025907	83.6126
mirdb	MIMAT0000208	mmu-miR-10b-5p	Ncoa6	56406	ENSMUSG00000038369	83.4402
pita	MIMAT0000208	mmu-miR-10b-5p	Tnni3k	435766	ENSMUSG00000040086	-16.61
pita	MIMAT0000208	mmu-miR-10b-5p	Fam211b	192734	ENSMUSG00000046807	-16.59
pita	MIMAT0000208	mmu-miR-10b-5p	Nop9	67842	ENSMUSG00000019297	-16.29
pita	MIMAT0000208	mmu-miR-10b-5p	D17Wsu92e	224647	ENSMUSG00000056692	-15.98
pita	MIMAT0000208	mmu-miR-10b-5p	Ablim1	226251	ENSMUSG00000025085	-15.87
pita	MIMAT0000208	mmu-miR-10b-5p	Nxph1	18231	ENSMUSG00000046178	-15.29
pita	MIMAT0000208	mmu-miR-10b-5p	Shroom1	71774	ENSMUSG00000018387	-14.97
pita	MIMAT0000208	mmu-miR-10b-5p	Zfp385c	278304	ENSMUSG00000014198	-14.87
pita	MIMAT0000208	mmu-miR-10b-5p	Syt7	54525	ENSMUSG00000024743	-14.78
pita	MIMAT0000208	mmu-miR-10b-5p	Lcp2	16822	ENSMUSG00000002699	-14.55
pita	MIMAT0000208	mmu-miR-10b-5p	Ormdl1	227102	ENSMUSG00000026097	-14.47
pita	MIMAT0000208	mmu-miR-10b-5p	Klhl24	75785	ENSMUSG00000062901	-14.3
pita	MIMAT0000208	mmu-miR-10b-5p	Akap8	56399	ENSMUSG00000024045	-14.04
pita	MIMAT0000208	mmu-miR-10b-5p	Dock5	68813	ENSMUSG00000044447	-13.96
pita	MIMAT0000208	mmu-miR-10b-5p	Tm4sf1	17112	ENSMUSG00000027800	-13.87
pita	MIMAT0000208	mmu-miR-10b-5p	Naip6	53880	ENSMUSG00000078942	-13.76
pita	MIMAT0000208	mmu-miR-10b-5p	Naip6	17952	ENSMUSG00000078942	-13.76
pita	MIMAT0000208	mmu-miR-10b-5p	Naip6	101056649	ENSMUSG00000078942	-13.76
pita	MIMAT0000208	mmu-miR-10b-5p	Zfyve1	217695	ENSMUSG00000042628	-13.75
pita	MIMAT0000208	mmu-miR-10b-5p	Hist1h3f	319154	ENSMUSG00000059309	-13.66
pita	MIMAT0000208	mmu-miR-10b-5p	Hist1h3f	319149	ENSMUSG00000059309	-13.66
pita	MIMAT0000208	mmu-miR-10b-5p	Hist1h3f	97114	ENSMUSG00000059309	-13.66
pita	MIMAT0000208	mmu-miR-10b-5p	Hist1h3f	319151	ENSMUSG00000059309	-13.66
pita	MIMAT0000208	mmu-miR-10b-5p	Hist1h3f	319148	ENSMUSG00000059309	-13.66
pita	MIMAT0000208	mmu-miR-10b-5p	Hist1h3f	15077	ENSMUSG00000059309	-13.66
pita	MIMAT0000208	mmu-miR-10b-5p	Hist1h3f	319150	ENSMUSG00000059309	-13.66
pita	MIMAT0000208	mmu-miR-10b-5p	Hist1h3f	260423	ENSMUSG00000059309	-13.66
pita	MIMAT0000208	mmu-miR-10b-5p	Ogfod1	270086	ENSMUSG00000033009	-13.64
pita	MIMAT0000208	mmu-miR-10b-5p	Immt	76614	ENSMUSG00000052337	-13.6
pita	MIMAT0000208	mmu-miR-10b-5p	Gpatch2l	70373	ENSMUSG00000021254	-13.58
pita	MIMAT0000208	mmu-miR-10b-5p	Dazap1	70248	ENSMUSG00000069565	-13.55
pita	MIMAT0000208	mmu-miR-10b-5p	Lamtor3	637657	ENSMUSG00000091512	-13.52
pita	MIMAT0000208	mmu-miR-10b-5p	Lamtor3	56692	ENSMUSG00000091512	-13.52
pita	MIMAT0000208	mmu-miR-10b-5p	Rbm44	329207	ENSMUSG00000070732	-13.45
pita	MIMAT0000208	mmu-miR-10b-5p	Gnal	14680	ENSMUSG00000024524	-13.35
pita	MIMAT0000208	mmu-miR-10b-5p	Pramef12	77632	ENSMUSG00000028591	-13.34
pita	MIMAT0000208	mmu-miR-10b-5p	Ldb3	24131	ENSMUSG00000021798	-13.06
pita	MIMAT0000208	mmu-miR-10b-5p	Zfp111	56707	ENSMUSG00000087598	-13.05
pita	MIMAT0000208	mmu-miR-10b-5p	Olfr558	259097	ENSMUSG00000070423	-13.02
pita	MIMAT0000208	mmu-miR-10b-5p	Rpl7l1	66229	ENSMUSG00000063888	-12.62
pita	MIMAT0000208	mmu-miR-10b-5p	Dpp6	13483	ENSMUSG00000061576	-12.61
pita	MIMAT0000208	mmu-miR-10b-5p	1200011I18Rik	67467	ENSMUSG00000022008	-12.59
pita	MIMAT0000208	mmu-miR-10b-5p	Rpl31	638399	ENSMUSG00000073702	-12.58
pita	MIMAT0000208	mmu-miR-10b-5p	Rpl31	114641	ENSMUSG00000073702	-12.58
pita	MIMAT0000208	mmu-miR-10b-5p	Rpl31	665562	ENSMUSG00000073702	-12.58
pita	MIMAT0000208	mmu-miR-10b-5p	Vipr1	22354	ENSMUSG00000032528	-12.53
pita	MIMAT0000208	mmu-miR-10b-5p	Cd80	12519	ENSMUSG00000075122	-12.47
pita	MIMAT0000208	mmu-miR-10b-5p	Zcchc7			-12.39
pita	MIMAT0000208	mmu-miR-10b-5p	Dock5	68813	ENSMUSG00000044447	-12.38
pita	MIMAT0000208	mmu-miR-10b-5p	Kcna7	16495	ENSMUSG00000038201	-12.36
pita	MIMAT0000208	mmu-miR-10b-5p	Bdkrb1	12061	ENSMUSG00000041347	-12.35
pita	MIMAT0000208	mmu-miR-10b-5p	Adck2	57869	ENSMUSG00000046947	-12.25
pita	MIMAT0000208	mmu-miR-10b-5p	F11r	16456	ENSMUSG00000038235	-12.18
pita	MIMAT0000208	mmu-miR-10b-5p	A430105I19Rik	214239	ENSMUSG00000045838	-12.08
pita	MIMAT0000208	mmu-miR-10b-5p	Rc3h2	319817	ENSMUSG00000075376	-12.05
pita	MIMAT0000208	mmu-miR-10b-5p	C4b	675521	ENSMUSG00000073418	-12.04
pita	MIMAT0000208	mmu-miR-10b-5p	C4b	12268	ENSMUSG00000073418	-12.04
pita	MIMAT0000208	mmu-miR-10b-5p	Rbfox2	93686	ENSMUSG00000033565	-12.01
pita	MIMAT0000208	mmu-miR-10b-5p	Mrp63	67840	ENSMUSG00000021967	-12.01
pita	MIMAT0000208	mmu-miR-10b-5p	Colec10	239447	ENSMUSG00000038591	-11.97
pita	MIMAT0000208	mmu-miR-10b-5p	Dcun1d1	114893	ENSMUSG00000027708	-11.96
pita	MIMAT0000208	mmu-miR-10b-5p	Inhbe	16326	ENSMUSG00000047492	-11.95
pita	MIMAT0000208	mmu-miR-10b-5p	Gimap5	317757	ENSMUSG00000043505	-11.92
pita	MIMAT0000208	mmu-miR-10b-5p	Onecut2	225631	ENSMUSG00000045991	-11.89
pita	MIMAT0000208	mmu-miR-10b-5p	Klhl31	244923	ENSMUSG00000044938	-11.88
pita	MIMAT0000208	mmu-miR-10b-5p	Ticrr	77011	ENSMUSG00000046591	-11.86
pita	MIMAT0000208	mmu-miR-10b-5p	Mtss1l	244654	ENSMUSG00000033763	-11.85
pita	MIMAT0000208	mmu-miR-10b-5p	C4a			-11.8
pita	MIMAT0000208	mmu-miR-10b-5p	Rnps1	19826	ENSMUSG00000034681	-11.78
pita	MIMAT0000208	mmu-miR-10b-5p	Kcnk18	332396	ENSMUSG00000040901	-11.77
pita	MIMAT0000208	mmu-miR-10b-5p	Gmnc	239789	ENSMUSG00000068428	-11.73
pita	MIMAT0000208	mmu-miR-10b-5p	Cdk19	78334	ENSMUSG00000038481	-11.7
pita	MIMAT0000208	mmu-miR-10b-5p	Lrrc58	320184	ENSMUSG00000034158	-11.69
pita	MIMAT0000208	mmu-miR-10b-5p	Tns4	217169	ENSMUSG00000017607	-11.65
pita	MIMAT0000208	mmu-miR-10b-5p	Zfp251	71591	ENSMUSG00000022526	-11.6
pita	MIMAT0000208	mmu-miR-10b-5p	Ptprh	545902	ENSMUSG00000035429	-11.56
pita	MIMAT0000208	mmu-miR-10b-5p	Necap1	67602	ENSMUSG00000030327	-11.5
pita	MIMAT0000208	mmu-miR-10b-5p	Ptprh	545902	ENSMUSG00000035429	-11.47
pita	MIMAT0000208	mmu-miR-10b-5p	Gnal	14680	ENSMUSG00000024524	-11.46
pita	MIMAT0000208	mmu-miR-10b-5p	Ptprh	545902	ENSMUSG00000035429	-11.41
pita	MIMAT0000208	mmu-miR-10b-5p	Nip7	66164	ENSMUSG00000031917	-11.36
pita	MIMAT0000208	mmu-miR-10b-5p	Hmgcs2	15360	ENSMUSG00000027875	-11.36
pita	MIMAT0000208	mmu-miR-10b-5p	Kcng3	225030	ENSMUSG00000045053	-11.31
pita	MIMAT0000208	mmu-miR-10b-5p	Ptprh	545902	ENSMUSG00000035429	-11.31
pita	MIMAT0000208	mmu-miR-10b-5p	Ubn2	320538	ENSMUSG00000038538	-11.29
pita	MIMAT0000208	mmu-miR-10b-5p	Smarce1	57376	ENSMUSG00000037935	-11.22
pita	MIMAT0000208	mmu-miR-10b-5p	Fam109a	231717	ENSMUSG00000044134	-11.21
pita	MIMAT0000208	mmu-miR-10b-5p	Bmp8b	12164	ENSMUSG00000002384	-11.17
pita	MIMAT0000208	mmu-miR-10b-5p	Vnn3	26464	ENSMUSG00000020010	-11.17
pita	MIMAT0000208	mmu-miR-10b-5p	Hnrnpab	15384	ENSMUSG00000020358	-11.14
pita	MIMAT0000208	mmu-miR-10b-5p	Ptprh	545902	ENSMUSG00000035429	-11.12
pita	MIMAT0000208	mmu-miR-10b-5p	Ptprh	545902	ENSMUSG00000035429	-11.11
pita	MIMAT0000208	mmu-miR-10b-5p	Zmat3	22401	ENSMUSG00000027663	-11.11
pita	MIMAT0000208	mmu-miR-10b-5p	Ube2d3	66105	ENSMUSG00000078578	-11.03
pita	MIMAT0000208	mmu-miR-10b-5p	Taok1	216965	ENSMUSG00000017291	-11.01
pita	MIMAT0000208	mmu-miR-10b-5p	Nr2f2	11819	ENSMUSG00000030551	-11.01
pita	MIMAT0000208	mmu-miR-10b-5p	Ly6c2	100041546	ENSMUSG00000022584	-10.99
pita	MIMAT0000208	mmu-miR-10b-5p	Btbd3	228662	ENSMUSG00000062098	-10.99
pita	MIMAT0000208	mmu-miR-10b-5p	Bmp2k	140780	ENSMUSG00000034663	-10.96
pita	MIMAT0000208	mmu-miR-10b-5p	A730069N07Rik			-10.96
pita	MIMAT0000208	mmu-miR-10b-5p	Kcnj2	16518	ENSMUSG00000041695	-10.95
pita	MIMAT0000208	mmu-miR-10b-5p	Dclre1c	227525	ENSMUSG00000026648	-10.93
pita	MIMAT0000208	mmu-miR-10b-5p	Prss57	73106	ENSMUSG00000020323	-10.92
pita	MIMAT0000208	mmu-miR-10b-5p	Stk4	58231	ENSMUSG00000018209	-10.83
pita	MIMAT0000208	mmu-miR-10b-5p	Adarb1	110532	ENSMUSG00000020262	-10.79
pita	MIMAT0000208	mmu-miR-10b-5p	Gm13078	277666	ENSMUSG00000046435	-10.78
pita	MIMAT0000208	mmu-miR-10b-5p	Pdcl	67466	ENSMUSG00000009030	-10.78
pita	MIMAT0000208	mmu-miR-10b-5p	Samd4	74480	ENSMUSG00000021838	-10.77
pita	MIMAT0000208	mmu-miR-10b-5p	Chst2	54371	ENSMUSG00000033350	-10.76
pita	MIMAT0000208	mmu-miR-10b-5p	Mc4r	17202	ENSMUSG00000047259	-10.76
pita	MIMAT0000208	mmu-miR-10b-5p	Ptprh	545902	ENSMUSG00000035429	-10.76
pita	MIMAT0000208	mmu-miR-10b-5p	Zfyve27	319740	ENSMUSG00000018820	-10.75
pita	MIMAT0000208	mmu-miR-10b-5p	Iffo2	212632	ENSMUSG00000041025	-10.73
pita	MIMAT0000208	mmu-miR-10b-5p	Gbp4	17472	ENSMUSG00000079363	-10.72
targetscan	MIMAT0000208	mmu-miR-10b-5p	Bdnf	12064	ENSMUSG00000048482	-0.539
targetscan	MIMAT0000208	mmu-miR-10b-5p	Kif18a	228421	ENSMUSG00000027115	-0.516
targetscan	MIMAT0000208	mmu-miR-10b-5p	Zfp64	22722	ENSMUSG00000027551	-0.505
targetscan	MIMAT0000208	mmu-miR-10b-5p	Cadm2	239857	ENSMUSG00000064115	-0.478
targetscan	MIMAT0000208	mmu-miR-10b-5p	Glrx2	69367	ENSMUSG00000018196	-0.474
targetscan	MIMAT0000208	mmu-miR-10b-5p	C4b	12268	ENSMUSG00000073418	-0.473
targetscan	MIMAT0000208	mmu-miR-10b-5p	Rb1cc1	12421	ENSMUSG00000025907	-0.469
targetscan	MIMAT0000208	mmu-miR-10b-5p	Pgm3	109785	ENSMUSG00000056131	-0.468
targetscan	MIMAT0000208	mmu-miR-10b-5p	Pcdh10	18526	ENSMUSG00000049100	-0.467
targetscan	MIMAT0000208	mmu-miR-10b-5p	Niacr1	80885	ENSMUSG00000045502	-0.466
targetscan	MIMAT0000208	mmu-miR-10b-5p	Anapc16	52717	ENSMUSG00000020107	-0.464
targetscan	MIMAT0000208	mmu-miR-10b-5p	C4a	625018		-0.461
targetscan	MIMAT0000208	mmu-miR-10b-5p	Pgm2l1	70974	ENSMUSG00000030729	-0.46
targetscan	MIMAT0000208	mmu-miR-10b-5p	Slc35g1	240660	ENSMUSG00000044026	-0.455
targetscan	MIMAT0000208	mmu-miR-10b-5p	Tmem132b	208151	ENSMUSG00000070498	-0.45
targetscan	MIMAT0000208	mmu-miR-10b-5p	Ndnl2	66647	ENSMUSG00000070520	-0.449
targetscan	MIMAT0000208	mmu-miR-10b-5p	B3gntl1	210004	ENSMUSG00000046605	-0.446
targetscan	MIMAT0000208	mmu-miR-10b-5p	Bmp2k	140780	ENSMUSG00000034663	-0.445
targetscan	MIMAT0000208	mmu-miR-10b-5p	Hoxa3	15400	ENSMUSG00000079560	-0.445
targetscan	MIMAT0000208	mmu-miR-10b-5p	Clcc1	229725	ENSMUSG00000027884	-0.443
targetscan	MIMAT0000208	mmu-miR-10b-5p	Rtn4	68585	ENSMUSG00000020458	-0.441
targetscan	MIMAT0000208	mmu-miR-10b-5p	Mars2	212679	ENSMUSG00000046994	-0.44
targetscan	MIMAT0000208	mmu-miR-10b-5p	Ndufb5	66046	ENSMUSG00000027673	-0.434
targetscan	MIMAT0000208	mmu-miR-10b-5p	Eri1	67276	ENSMUSG00000031527	-0.433
targetscan	MIMAT0000208	mmu-miR-10b-5p	Ms4a6b	69774	ENSMUSG00000024677	-0.431
targetscan	MIMAT0000208	mmu-miR-10b-5p	Tbx5	21388	ENSMUSG00000018263	-0.43
targetscan	MIMAT0000208	mmu-miR-10b-5p	Zfp534	100503584	ENSMUSG00000062518	-0.43
targetscan	MIMAT0000208	mmu-miR-10b-5p	Atad5	237877	ENSMUSG00000017550	-0.426
targetscan	MIMAT0000208	mmu-miR-10b-5p	Slc9a4	110895	ENSMUSG00000026065	-0.426
targetscan	MIMAT0000208	mmu-miR-10b-5p	Arsj	271970	ENSMUSG00000046561	-0.426
targetscan	MIMAT0000208	mmu-miR-10b-5p	Ncor2	20602	ENSMUSG00000029478	-0.424
targetscan	MIMAT0000208	mmu-miR-10b-5p	4930563D23Rik	75328	ENSMUSG00000051728	-0.423
targetscan	MIMAT0000208	mmu-miR-10b-5p	Tnni3k	435766	ENSMUSG00000040086	-0.42
targetscan	MIMAT0000208	mmu-miR-10b-5p	Opa1	74143	ENSMUSG00000038084	-0.419
targetscan	MIMAT0000208	mmu-miR-10b-5p	Abcb7	11306	ENSMUSG00000031333	-0.416
targetscan	MIMAT0000208	mmu-miR-10b-5p	Bcl2l11	12125	ENSMUSG00000027381	-0.416
targetscan	MIMAT0000208	mmu-miR-10b-5p	Zfp367	238673	ENSMUSG00000044934	-0.415
targetscan	MIMAT0000208	mmu-miR-10b-5p	Mycs	17870	ENSMUSG00000044597	-0.412
targetscan	MIMAT0000208	mmu-miR-10b-5p	Arhgef18	102098	ENSMUSG00000004568	-0.411
targetscan	MIMAT0000208	mmu-miR-10b-5p	Chrnb4	108015	ENSMUSG00000035200	-0.41
targetscan	MIMAT0000208	mmu-miR-10b-5p	Tmprss5	80893	ENSMUSG00000032268	-0.408
targetscan	MIMAT0000208	mmu-miR-10b-5p	Gtf2e2	68153	ENSMUSG00000031585	-0.408
targetscan	MIMAT0000208	mmu-miR-10b-5p	Zfp27	22689	ENSMUSG00000062040	-0.407
targetscan	MIMAT0000208	mmu-miR-10b-5p	Gpr174	213439	ENSMUSG00000073008	-0.406
targetscan	MIMAT0000208	mmu-miR-10b-5p	Nnt	18115		-0.404
targetscan	MIMAT0000208	mmu-miR-10b-5p	Ccdc116	76872	ENSMUSG00000022768	-0.401
targetscan	MIMAT0000208	mmu-miR-10b-5p	Clcc1	229725	ENSMUSG00000027884	-0.397
targetscan	MIMAT0000208	mmu-miR-10b-5p	Gtf2e1	74197	ENSMUSG00000022828	-0.397
targetscan	MIMAT0000208	mmu-miR-10b-5p	Zfp874b	408067	ENSMUSG00000059839	-0.395
targetscan	MIMAT0000208	mmu-miR-10b-5p	Spata9	75571	ENSMUSG00000021590	-0.395
targetscan	MIMAT0000208	mmu-miR-10b-5p	Hs6st2	50786	ENSMUSG00000062184	-0.394
targetscan	MIMAT0000208	mmu-miR-10b-5p	Smap1	98366	ENSMUSG00000026155	-0.393
targetscan	MIMAT0000208	mmu-miR-10b-5p	Serp1	28146	ENSMUSG00000027808	-0.393
targetscan	MIMAT0000208	mmu-miR-10b-5p	Ebf2	13592	ENSMUSG00000022053	-0.392
targetscan	MIMAT0000208	mmu-miR-10b-5p	Tmprss11bnl	319875	ENSMUSG00000035861	-0.391
targetscan	MIMAT0000208	mmu-miR-10b-5p	Patl1	225929	ENSMUSG00000046139	-0.39
targetscan	MIMAT0000208	mmu-miR-10b-5p	Purg	75029	ENSMUSG00000049184	-0.39
targetscan	MIMAT0000208	mmu-miR-10b-5p	Tmod1	21916	ENSMUSG00000028328	-0.389
targetscan	MIMAT0000208	mmu-miR-10b-5p	Tescl	69301	ENSMUSG00000055826	-0.389
targetscan	MIMAT0000208	mmu-miR-10b-5p	Fam109a	231717	ENSMUSG00000044134	-0.388
targetscan	MIMAT0000208	mmu-miR-10b-5p	Pde8b	218461	ENSMUSG00000021684	-0.386
targetscan	MIMAT0000208	mmu-miR-10b-5p	Katnb1	74187	ENSMUSG00000031787	-0.386
targetscan	MIMAT0000208	mmu-miR-10b-5p	Pear1	73182	ENSMUSG00000028073	-0.385
targetscan	MIMAT0000208	mmu-miR-10b-5p	Clec14a	66864	ENSMUSG00000045930	-0.382
targetscan	MIMAT0000208	mmu-miR-10b-5p	Fbf1	217335	ENSMUSG00000020776	-0.377
targetscan	MIMAT0000208	mmu-miR-10b-5p	Nudt5	53893	ENSMUSG00000025817	-0.377
targetscan	MIMAT0000208	mmu-miR-10b-5p	Cd33	12489	ENSMUSG00000004609	-0.375
targetscan	MIMAT0000208	mmu-miR-10b-5p	Dock9	105445	ENSMUSG00000025558	-0.374
targetscan	MIMAT0000208	mmu-miR-10b-5p	Pfkfb2	18640	ENSMUSG00000026409	-0.373
targetscan	MIMAT0000208	mmu-miR-10b-5p	Gfm2	320806	ENSMUSG00000021666	-0.371
targetscan	MIMAT0000208	mmu-miR-10b-5p	Vps39	269338	ENSMUSG00000027291	-0.368
targetscan	MIMAT0000208	mmu-miR-10b-5p	Cyp2c50	107141	ENSMUSG00000054827	-0.366
targetscan	MIMAT0000208	mmu-miR-10b-5p	Foxi1	14233	ENSMUSG00000047861	-0.365
targetscan	MIMAT0000208	mmu-miR-10b-5p	Ankrd16	320816	ENSMUSG00000047909	-0.365
targetscan	MIMAT0000208	mmu-miR-10b-5p	Map3k7	26409	ENSMUSG00000028284	-0.362
targetscan	MIMAT0000208	mmu-miR-10b-5p	Klf11	194655	ENSMUSG00000020653	-0.362
targetscan	MIMAT0000208	mmu-miR-10b-5p	Cdc42bpa	226751	ENSMUSG00000026490	-0.361
targetscan	MIMAT0000208	mmu-miR-10b-5p	Fam214b	230088	ENSMUSG00000036002	-0.361
targetscan	MIMAT0000208	mmu-miR-10b-5p	Nicn1	66257	ENSMUSG00000032606	-0.36
targetscan	MIMAT0000208	mmu-miR-10b-5p	Zfp282	101095	ENSMUSG00000025821	-0.36
targetscan	MIMAT0000208	mmu-miR-10b-5p	Ms4a6c	73656	ENSMUSG00000079419	-0.36
targetscan	MIMAT0000208	mmu-miR-10b-5p	Gata6	14465	ENSMUSG00000005836	-0.359
targetscan	MIMAT0000208	mmu-miR-10b-5p	Hoxb3	15410	ENSMUSG00000048763	-0.358
targetscan	MIMAT0000208	mmu-miR-10b-5p	Tfap2c	21420	ENSMUSG00000028640	-0.357
targetscan	MIMAT0000208	mmu-miR-10b-5p	Slc7a5	20539	ENSMUSG00000040010	-0.357
targetscan	MIMAT0000208	mmu-miR-10b-5p	Rasl12	70784	ENSMUSG00000041696	-0.355
targetscan	MIMAT0000208	mmu-miR-10b-5p	Acer1	171168	ENSMUSG00000045019	-0.354
targetscan	MIMAT0000208	mmu-miR-10b-5p	Rhpn2	52428	ENSMUSG00000030494	-0.354
targetscan	MIMAT0000208	mmu-miR-10b-5p	Kcnj5	16521	ENSMUSG00000032034	-0.353
targetscan	MIMAT0000208	mmu-miR-10b-5p		50918	ENSMUSG00000097829	-0.353
targetscan	MIMAT0000208	mmu-miR-10b-5p		66990	ENSMUSG00000097394	-0.353
targetscan	MIMAT0000208	mmu-miR-10b-5p	Myadm	50918	ENSMUSG00000068566	-0.353
targetscan	MIMAT0000208	mmu-miR-10b-5p	Arhgap25	232201	ENSMUSG00000030047	-0.353
targetscan	MIMAT0000208	mmu-miR-10b-5p	Ccdc36	434438	ENSMUSG00000047220	-0.352
targetscan	MIMAT0000208	mmu-miR-10b-5p	Scn3a	20269	ENSMUSG00000057182	-0.352
targetscan	MIMAT0000208	mmu-miR-10b-5p	1700030J22Rik	69528	ENSMUSG00000031847	-0.351
targetscan	MIMAT0000208	mmu-miR-10b-5p	Athl1	212974	ENSMUSG00000062031	-0.35
targetscan	MIMAT0000208	mmu-miR-10b-5p	Slc29a3	71279	ENSMUSG00000020100	-0.35
targetscan	MIMAT0000208	mmu-miR-10b-5p	Cd44	12505	ENSMUSG00000005087	-0.35
targetscan	MIMAT0000208	mmu-miR-10b-5p	Prr16	71373	ENSMUSG00000073565	-0.349
targetscan	MIMAT0000208	mmu-miR-10b-5p	Cog7	233824	ENSMUSG00000034951	-0.349
targetscan	MIMAT0000208	mmu-miR-10b-5p	Fxyd6	59095	ENSMUSG00000066705	-0.347
targetscan	MIMAT0000208	mmu-miR-10b-5p	Hoxd1	15429	ENSMUSG00000042448	-0.347
targetscan	MIMAT0000208	mmu-miR-10b-5p	Cdon	57810	ENSMUSG00000038119	-0.345
targetscan	MIMAT0000208	mmu-miR-10b-5p	Cyb5d2	192986	ENSMUSG00000057778	-0.345
targetscan	MIMAT0000208	mmu-miR-10b-5p	Angptl7	654812	ENSMUSG00000028989	-0.344
targetscan	MIMAT0000208	mmu-miR-10b-5p	Lpar2	53978	ENSMUSG00000031861	-0.344
targetscan	MIMAT0000208	mmu-miR-10b-5p	Cd33	12489	ENSMUSG00000004609	-0.344
targetscan	MIMAT0000208	mmu-miR-10b-5p	Sec22c	215474	ENSMUSG00000061536	-0.342
targetscan	MIMAT0000208	mmu-miR-10b-5p	St3gal4	20443	ENSMUSG00000032038	-0.342
targetscan	MIMAT0000208	mmu-miR-10b-5p	Tox4	268741	ENSMUSG00000016831	-0.342
targetscan	MIMAT0000208	mmu-miR-10b-5p	Bdkrb1	12061	ENSMUSG00000041347	-0.341
targetscan	MIMAT0000208	mmu-miR-10b-5p	1700039E15Rik	76713	ENSMUSG00000070568	-0.341
targetscan	MIMAT0000208	mmu-miR-10b-5p	Tyrobp	22177	ENSMUSG00000030579	-0.34
targetscan	MIMAT0000208	mmu-miR-10b-5p	Fign	60344	ENSMUSG00000075324	-0.337
targetscan	MIMAT0000208	mmu-miR-10b-5p	Gpatch2l	70373	ENSMUSG00000021254	-0.336
targetscan	MIMAT0000208	mmu-miR-10b-5p	Smim1	68859	ENSMUSG00000078350	-0.335
targetscan	MIMAT0000208	mmu-miR-10b-5p	Naglu	27419	ENSMUSG00000001751	-0.333
targetscan	MIMAT0000208	mmu-miR-10b-5p	Dkk2	56811	ENSMUSG00000028031	-0.332
targetscan	MIMAT0000208	mmu-miR-10b-5p	Pdcl3	68833	ENSMUSG00000026078	-0.332
targetscan	MIMAT0000208	mmu-miR-10b-5p	Palm3	74337	ENSMUSG00000047986	-0.332
targetscan	MIMAT0000208	mmu-miR-10b-5p	Ube2z	268470	ENSMUSG00000014349	-0.331
targetscan	MIMAT0000208	mmu-miR-10b-5p	Phf14	75725	ENSMUSG00000029629	-0.33
targetscan	MIMAT0000208	mmu-miR-10b-5p	Zfp784	654801	ENSMUSG00000043290	-0.329
targetscan	MIMAT0000208	mmu-miR-10b-5p	Mdga2	320772	ENSMUSG00000034912	-0.328
targetscan	MIMAT0000208	mmu-miR-10b-5p	Zc3hc1	232679	ENSMUSG00000039130	-0.328
targetscan	MIMAT0000208	mmu-miR-10b-5p	Usp49	224836	ENSMUSG00000090115	-0.327
targetscan	MIMAT0000208	mmu-miR-10b-5p	Spcs2	66624	ENSMUSG00000035227	-0.327
targetscan	MIMAT0000208	mmu-miR-10b-5p	Chrna7	11441	ENSMUSG00000030525	-0.326
targetscan	MIMAT0000208	mmu-miR-10b-5p	Chka	12660	ENSMUSG00000024843	-0.326
targetscan	MIMAT0000208	mmu-miR-10b-5p	Spice1	212514	ENSMUSG00000043065	-0.325
targetscan	MIMAT0000208	mmu-miR-10b-5p	Irgm2	54396	ENSMUSG00000069874	-0.325
targetscan	MIMAT0000208	mmu-miR-10b-5p	Id4	15904	ENSMUSG00000021379	-0.324
targetscan	MIMAT0000208	mmu-miR-10b-5p	Zfp385c	278304	ENSMUSG00000014198	-0.324
targetscan	MIMAT0000208	mmu-miR-10b-5p	Kcnb2	98741	ENSMUSG00000092083	-0.322
targetscan	MIMAT0000208	mmu-miR-10b-5p	Samd10	229011	ENSMUSG00000038605	-0.322
targetscan	MIMAT0000208	mmu-miR-10b-5p	Smok3b	545814	ENSMUSG00000079156	-0.32
targetscan	MIMAT0000208	mmu-miR-10b-5p	Smok3a	545814	ENSMUSG00000075599	-0.32
targetscan	MIMAT0000208	mmu-miR-10b-5p	Mageb4	434903	ENSMUSG00000035427	-0.318
targetscan	MIMAT0000208	mmu-miR-10b-5p	Smarce1	57376	ENSMUSG00000037935	-0.317
targetscan	MIMAT0000208	mmu-miR-10b-5p	Ccdc121	403180	ENSMUSG00000050625	-0.316
targetscan	MIMAT0000208	mmu-miR-10b-5p	Kalrn	545156	ENSMUSG00000061751	-0.316
targetscan	MIMAT0000208	mmu-miR-10b-5p	Bdkrb1	12061	ENSMUSG00000041347	-0.315
targetscan	MIMAT0000208	mmu-miR-10b-5p	Psmd13	23997	ENSMUSG00000025487	-0.313
targetscan	MIMAT0000208	mmu-miR-10b-5p	Rap1gap	110351	ENSMUSG00000041351	-0.313
targetscan	MIMAT0000208	mmu-miR-10b-5p	Npas3	27386	ENSMUSG00000021010	-0.312
targetscan	MIMAT0000208	mmu-miR-10b-5p	Iqub	214704	ENSMUSG00000046192	-0.312
targetscan	MIMAT0000208	mmu-miR-10b-5p	Elmo3	234683	ENSMUSG00000014791	-0.311
targetscan	MIMAT0000208	mmu-miR-10b-5p	Trim39	79263	ENSMUSG00000045409	-0.31
targetscan	MIMAT0000208	mmu-miR-10b-5p	3110043O21Rik	73205	ENSMUSG00000028300	-0.309
targetscan	MIMAT0000208	mmu-miR-10b-5p	Frs2	327826	ENSMUSG00000020170	-0.308
targetscan	MIMAT0000208	mmu-miR-10b-5p	Homer1	26556	ENSMUSG00000007617	-0.307
targetscan	MIMAT0000208	mmu-miR-10b-5p	Eri3	140546	ENSMUSG00000033423	-0.307
targetscan	MIMAT0000208	mmu-miR-10b-5p	Nod2	257632	ENSMUSG00000055994	-0.306
targetscan	MIMAT0000208	mmu-miR-10b-5p	Cyth1	19157	ENSMUSG00000017132	-0.305
targetscan	MIMAT0000208	mmu-miR-10b-5p	Lyrm7	75530	ENSMUSG00000020268	-0.304
targetscan	MIMAT0000208	mmu-miR-10b-5p	Pan2	103135	ENSMUSG00000005682	-0.303
targetscan	MIMAT0000208	mmu-miR-10b-5p	Galnt1	14423	ENSMUSG00000000420	-0.302
targetscan	MIMAT0000208	mmu-miR-10b-5p	Cd82	12521	ENSMUSG00000027215	-0.301
targetscan	MIMAT0000208	mmu-miR-10b-5p	Cd82	12521	ENSMUSG00000027215	-0.3
targetscan	MIMAT0000208	mmu-miR-10b-5p	Tyw1	100929	ENSMUSG00000056310	-0.3
targetscan	MIMAT0000208	mmu-miR-10b-5p	Lyrm9	66274	ENSMUSG00000072640	-0.298
targetscan	MIMAT0000208	mmu-miR-10b-5p	Dazap1	70248	ENSMUSG00000069565	-0.297
targetscan	MIMAT0000208	mmu-miR-10b-5p	Cttnbp2nl	80281	ENSMUSG00000062127	-0.297
targetscan	MIMAT0000208	mmu-miR-10b-5p	Nyap2	241134	ENSMUSG00000054976	-0.295
targetscan	MIMAT0000208	mmu-miR-10b-5p	Suv39h2	64707	ENSMUSG00000026646	-0.295
targetscan	MIMAT0000208	mmu-miR-10b-5p	Fcrla	98752	ENSMUSG00000038421	-0.294
targetscan	MIMAT0000208	mmu-miR-10b-5p	Glis1	230587	ENSMUSG00000034762	-0.294
targetscan	MIMAT0000208	mmu-miR-10b-5p	Bmp8b	12164	ENSMUSG00000002384	-0.294
targetscan	MIMAT0000208	mmu-miR-10b-5p	Camk2b	12323	ENSMUSG00000057897	-0.293
targetscan	MIMAT0000208	mmu-miR-10b-5p	Usp29	57775	ENSMUSG00000051527	-0.293
targetscan	MIMAT0000208	mmu-miR-10b-5p	Grap2	17444	ENSMUSG00000042351	-0.293
targetscan	MIMAT0000208	mmu-miR-10b-5p	Ash2l	23808	ENSMUSG00000031575	-0.291
targetscan	MIMAT0000208	mmu-miR-10b-5p	Wwtr1	97064	ENSMUSG00000027803	-0.291
targetscan	MIMAT0000208	mmu-miR-10b-5p	Kcnk18	332396	ENSMUSG00000040901	-0.289
targetscan	MIMAT0000208	mmu-miR-10b-5p	Rnf14	56736	ENSMUSG00000060450	-0.289
targetscan	MIMAT0000208	mmu-miR-10b-5p	Serpinb6b	20708	ENSMUSG00000042842	-0.287
targetscan	MIMAT0000208	mmu-miR-10b-5p	Fnbp1l	214459	ENSMUSG00000039735	-0.286
targetscan	MIMAT0000208	mmu-miR-10b-5p	Celf2	14007	ENSMUSG00000002107	-0.286
targetscan	MIMAT0000208	mmu-miR-10b-5p	Adrbk1	110355	ENSMUSG00000024858	-0.286
targetscan	MIMAT0000208	mmu-miR-10b-5p	Idh3a	67834	ENSMUSG00000032279	-0.286
targetscan	MIMAT0000208	mmu-miR-10b-5p	Ept1	28042	ENSMUSG00000075703	-0.285
targetscan	MIMAT0000208	mmu-miR-10b-5p	Atp6ap2	70495	ENSMUSG00000031007	-0.285
targetscan	MIMAT0000208	mmu-miR-10b-5p	Ccpg1	72278	ENSMUSG00000034563	-0.285
targetscan	MIMAT0000208	mmu-miR-10b-5p	Bcl2	12043	ENSMUSG00000057329	-0.284
targetscan	MIMAT0000208	mmu-miR-10b-5p	Tmem19	67226	ENSMUSG00000069520	-0.283
targetscan	MIMAT0000208	mmu-miR-10b-5p	Suv420h1	225888	ENSMUSG00000045098	-0.283
targetscan	MIMAT0000208	mmu-miR-10b-5p	Vezt	215008	ENSMUSG00000036099	-0.282
targetscan	MIMAT0000208	mmu-miR-10b-5p	Plekhh3	217198	ENSMUSG00000035172	-0.282
targetscan	MIMAT0000208	mmu-miR-10b-5p	Sobp	109205	ENSMUSG00000038248	-0.282
targetscan	MIMAT0000208	mmu-miR-10b-5p	Spag9	70834	ENSMUSG00000020859	-0.282
targetscan	MIMAT0000208	mmu-miR-10b-5p	Tmem38b	52076	ENSMUSG00000028420	-0.281
targetscan	MIMAT0000208	mmu-miR-10b-5p	Med18	67219	ENSMUSG00000066042	-0.281
targetscan	MIMAT0000208	mmu-miR-10b-5p	Son	20658	ENSMUSG00000022961	-0.28
targetscan	MIMAT0000208	mmu-miR-10b-5p	Camk2b	12323	ENSMUSG00000057897	-0.28
targetscan	MIMAT0000208	mmu-miR-10b-5p	Rbak	57782	ENSMUSG00000061898	-0.279
targetscan	MIMAT0000208	mmu-miR-10b-5p	Stk4	58231	ENSMUSG00000018209	-0.278
targetscan	MIMAT0000208	mmu-miR-10b-5p	Plekhg1	213783	ENSMUSG00000040624	-0.278
targetscan	MIMAT0000208	mmu-miR-10b-5p	Gata3	14462	ENSMUSG00000015619	-0.277
targetscan	MIMAT0000208	mmu-miR-10b-5p	Rad51	19361	ENSMUSG00000027323	-0.277
targetscan	MIMAT0000208	mmu-miR-10b-5p	Syne1	64009	ENSMUSG00000096054	-0.277
targetscan	MIMAT0000208	mmu-miR-10b-5p	Syne1	64009	ENSMUSG00000019769	-0.277
targetscan	MIMAT0000208	mmu-miR-10b-5p	Map2k6	26399	ENSMUSG00000020623	-0.276
targetscan	MIMAT0000208	mmu-miR-10b-5p	Glt8d2	74782	ENSMUSG00000020251	-0.276
targetscan	MIMAT0000208	mmu-miR-10b-5p	Crhr2	12922	ENSMUSG00000003476	-0.275
targetscan	MIMAT0000208	mmu-miR-10b-5p	Rpl31	114641	ENSMUSG00000073702	-0.275
targetscan	MIMAT0000208	mmu-miR-10b-5p	Akap6	238161	ENSMUSG00000061603	-0.275
targetscan	MIMAT0000208	mmu-miR-10b-5p	Zfp568	243905	ENSMUSG00000074221	-0.275
targetscan	MIMAT0000208	mmu-miR-10b-5p	Slc12a7	20499	ENSMUSG00000017756	-0.274
targetscan	MIMAT0000208	mmu-miR-10b-5p	Rem1	19700	ENSMUSG00000000359	-0.274
targetscan	MIMAT0000208	mmu-miR-10b-5p	Pde4c	110385	ENSMUSG00000031842	-0.274
targetscan	MIMAT0000208	mmu-miR-10b-5p	Usp45	77593	ENSMUSG00000040455	-0.274
targetscan	MIMAT0000208	mmu-miR-10b-5p	Mlycd	56690	ENSMUSG00000074064	-0.273
targetscan	MIMAT0000208	mmu-miR-10b-5p	Snrnp48	67797	ENSMUSG00000021431	-0.272
targetscan	MIMAT0000208	mmu-miR-10b-5p	Mybl1	17864	ENSMUSG00000025912	-0.272
targetscan	MIMAT0000208	mmu-miR-10b-5p	Hrasls	27281	ENSMUSG00000022525	-0.271
targetscan	MIMAT0000208	mmu-miR-10b-5p	Tst	22117	ENSMUSG00000044986	-0.271
targetscan	MIMAT0000208	mmu-miR-10b-5p	Cebpg	12611	ENSMUSG00000056216	-0.27
targetscan	MIMAT0000208	mmu-miR-10b-5p	Caap1	67770	ENSMUSG00000028578	-0.27
targetscan	MIMAT0000208	mmu-miR-10b-5p	Ablim1	226251	ENSMUSG00000025085	-0.269
targetscan	MIMAT0000208	mmu-miR-10b-5p	Fam132b	227358	ENSMUSG00000047443	-0.269
targetscan	MIMAT0000208	mmu-miR-10b-5p	Tsga10	211484	ENSMUSG00000060771	-0.268
targetscan	MIMAT0000208	mmu-miR-10b-5p	Gatm	67092	ENSMUSG00000027199	-0.267
targetscan	MIMAT0000208	mmu-miR-10b-5p	Nkiras2	71966	ENSMUSG00000017837	-0.267
targetscan	MIMAT0000208	mmu-miR-10b-5p	Yme1l1	27377	ENSMUSG00000026775	-0.267
targetscan	MIMAT0000208	mmu-miR-10b-5p	Atp8b3	67331	ENSMUSG00000003341	-0.266
targetscan	MIMAT0000208	mmu-miR-10b-5p	Rcsd1	226594	ENSMUSG00000040723	-0.266
targetscan	MIMAT0000208	mmu-miR-10b-5p	Medag	70717	ENSMUSG00000029659	-0.263
targetscan	MIMAT0000208	mmu-miR-10b-5p	5031439G07Rik	223739	ENSMUSG00000036046	-0.263
targetscan	MIMAT0000208	mmu-miR-10b-5p	Mapkbp1	26390	ENSMUSG00000033902	-0.263
targetscan	MIMAT0000208	mmu-miR-10b-5p	Ddx19b	234733	ENSMUSG00000033658	-0.263
targetscan	MIMAT0000208	mmu-miR-10b-5p	Umodl1	52020	ENSMUSG00000054134	-0.263
targetscan	MIMAT0000208	mmu-miR-10b-5p	Lrit1	239037	ENSMUSG00000041044	-0.262
targetscan	MIMAT0000208	mmu-miR-10b-5p	Tmem170b	621976	ENSMUSG00000087370	-0.262
targetscan	MIMAT0000208	mmu-miR-10b-5p	Oas1g	23960	ENSMUSG00000066861	-0.262
targetscan	MIMAT0000208	mmu-miR-10b-5p	Lpp	210126	ENSMUSG00000033306	-0.261
targetscan	MIMAT0000208	mmu-miR-10b-5p	Rc3h2	319817	ENSMUSG00000075376	-0.261
targetscan	MIMAT0000208	mmu-miR-10b-5p	Pip4k2b	108083	ENSMUSG00000018547	-0.261
targetscan	MIMAT0000208	mmu-miR-10b-5p	Csdc2	105859	ENSMUSG00000042109	-0.261
targetscan	MIMAT0000208	mmu-miR-10b-5p	Stk24	223255	ENSMUSG00000063410	-0.261
targetscan	MIMAT0000208	mmu-miR-10b-5p	E2f3	13557	ENSMUSG00000016477	-0.26
targetscan	MIMAT0000208	mmu-miR-10b-5p	Epdr1	105298	ENSMUSG00000002808	-0.26
targetscan	MIMAT0000208	mmu-miR-10b-5p	Col4a6	94216	ENSMUSG00000031273	-0.26
targetscan	MIMAT0000208	mmu-miR-10b-5p	Gna14	14675	ENSMUSG00000024697	-0.26
targetscan	MIMAT0000208	mmu-miR-10b-5p	Msra	110265	ENSMUSG00000054733	-0.26
targetscan	MIMAT0000208	mmu-miR-10b-5p	Wbscr16	94254	ENSMUSG00000061979	-0.259
targetscan	MIMAT0000208	mmu-miR-10b-5p	Hnrnph3	432467	ENSMUSG00000020069	-0.259
targetscan	MIMAT0000208	mmu-miR-10b-5p	Six1	20471	ENSMUSG00000051367	-0.259
targetscan	MIMAT0000208	mmu-miR-10b-5p	Clec9a	232414	ENSMUSG00000046080	-0.259
targetscan	MIMAT0000208	mmu-miR-10b-5p	Tbx22	245572	ENSMUSG00000031241	-0.259
targetscan	MIMAT0000208	mmu-miR-10b-5p	Dsg3	13512	ENSMUSG00000056632	-0.258
targetscan	MIMAT0000208	mmu-miR-10b-5p	Slc12a8	171286	ENSMUSG00000035506	-0.258
targetscan	MIMAT0000208	mmu-miR-10b-5p	Epha5	13839	ENSMUSG00000029245	-0.258
targetscan	MIMAT0000208	mmu-miR-10b-5p	Hsd17b1	15485	ENSMUSG00000019301	-0.257
targetscan	MIMAT0000208	mmu-miR-10b-5p	Elavl2	15569	ENSMUSG00000008489	-0.257
targetscan	MIMAT0000208	mmu-miR-10b-5p	Suox	211389	ENSMUSG00000049858	-0.257
targetscan	MIMAT0000208	mmu-miR-10b-5p	Ddx19b	234733	ENSMUSG00000033658	-0.256
targetscan	MIMAT0000208	mmu-miR-10b-5p	Dhodh	56749	ENSMUSG00000031730	-0.256
targetscan	MIMAT0000208	mmu-miR-10b-5p	Tbpl2	227606	ENSMUSG00000061809	-0.256
targetscan	MIMAT0000208	mmu-miR-10b-5p	Cd247	12503	ENSMUSG00000005763	-0.256
targetscan	MIMAT0000208	mmu-miR-10b-5p	Wipf1	215280	ENSMUSG00000075284	-0.256
targetscan	MIMAT0000208	mmu-miR-10b-5p	Aff4	93736	ENSMUSG00000049470	-0.256
targetscan	MIMAT0000208	mmu-miR-10b-5p	Haus1	225745	ENSMUSG00000041840	-0.256
targetscan	MIMAT0000208	mmu-miR-10b-5p	Gm6878	628416	ENSMUSG00000075549	-0.256
targetscan	MIMAT0000208	mmu-miR-10b-5p	Naf1	234344	ENSMUSG00000014907	-0.255
targetscan	MIMAT0000208	mmu-miR-10b-5p	Crxos1	546024	ENSMUSG00000074365	-0.255
targetscan	MIMAT0000208	mmu-miR-10b-5p	Abl2	11352	ENSMUSG00000026596	-0.255
targetscan	MIMAT0000208	mmu-miR-10b-5p	Olfr1180	258920	ENSMUSG00000075126	-0.255
targetscan	MIMAT0000208	mmu-miR-10b-5p	Lcp2	16822	ENSMUSG00000002699	-0.254
targetscan	MIMAT0000208	mmu-miR-10b-5p	Zfp827	622675	ENSMUSG00000071064	-0.254
targetscan	MIMAT0000208	mmu-miR-10b-5p	Acsf2	264895	ENSMUSG00000076435	-0.254
targetscan	MIMAT0000208	mmu-miR-10b-5p	March9	216438	ENSMUSG00000040502	-0.254
targetscan	MIMAT0000208	mmu-miR-10b-5p	Klrb1c	17059	ENSMUSG00000030325	-0.253
targetscan	MIMAT0000208	mmu-miR-10b-5p	Prkra	23992	ENSMUSG00000002731	-0.253
targetscan	MIMAT0000208	mmu-miR-10b-5p	Aplf	72103	ENSMUSG00000030051	-0.252
targetscan	MIMAT0000208	mmu-miR-10b-5p	Arhgef38	77669	ENSMUSG00000040969	-0.252
targetscan	MIMAT0000208	mmu-miR-10b-5p	Parp4	328417	ENSMUSG00000054509	-0.252
targetscan	MIMAT0000208	mmu-miR-10b-5p	Arl14epl	381142	ENSMUSG00000073568	-0.252
targetscan	MIMAT0000208	mmu-miR-10b-5p	Rpl31	114641	ENSMUSG00000073702	-0.252
targetscan	MIMAT0000208	mmu-miR-10b-5p	Sdc1	20969	ENSMUSG00000020592	-0.251
targetscan	MIMAT0000208	mmu-miR-10b-5p	Cds2	110911	ENSMUSG00000058793	-0.251
targetscan	MIMAT0000208	mmu-miR-10b-5p	Dhfr	13361	ENSMUSG00000021707	-0.251
targetscan	MIMAT0000208	mmu-miR-10b-5p	Cckar	12425	ENSMUSG00000029193	-0.251
targetscan	MIMAT0000208	mmu-miR-10b-5p	Pdcd11	18572	ENSMUSG00000025047	-0.251
targetscan	MIMAT0000208	mmu-miR-10b-5p	Trpm4	68667	ENSMUSG00000038260	-0.25
targetscan	MIMAT0000208	mmu-miR-10b-5p	Celf2	14007	ENSMUSG00000002107	-0.249
targetscan	MIMAT0000208	mmu-miR-10b-5p	Zpld1	239852	ENSMUSG00000064310	-0.249
targetscan	MIMAT0000208	mmu-miR-10b-5p	Arl13a	74448	ENSMUSG00000052549	-0.248
targetscan	MIMAT0000208	mmu-miR-10b-5p	Irs4	16370	ENSMUSG00000054667	-0.248
targetscan	MIMAT0000208	mmu-miR-10b-5p	Faf1	14084	ENSMUSG00000010517	-0.248
targetscan	MIMAT0000208	mmu-miR-10b-5p	Ivns1abp	117198	ENSMUSG00000023150	-0.247
targetscan	MIMAT0000208	mmu-miR-10b-5p	Kcna7	16495	ENSMUSG00000038201	-0.247
targetscan	MIMAT0000208	mmu-miR-10b-5p	Car5b	56078	ENSMUSG00000031373	-0.247
targetscan	MIMAT0000208	mmu-miR-10b-5p	Cenpl	70454	ENSMUSG00000026708	-0.247
targetscan	MIMAT0000208	mmu-miR-10b-5p	Mmp8	17394	ENSMUSG00000005800	-0.246
targetscan	MIMAT0000208	mmu-miR-10b-5p	Slc38a10	72055	ENSMUSG00000061306	-0.246
targetscan	MIMAT0000208	mmu-miR-10b-5p	Nupr1l	69034	ENSMUSG00000095789	-0.246
targetscan	MIMAT0000208	mmu-miR-10b-5p	Sntg2	268534	ENSMUSG00000020672	-0.246
targetscan	MIMAT0000208	mmu-miR-10b-5p	Zfp689	71131	ENSMUSG00000048921	-0.244
targetscan	MIMAT0000208	mmu-miR-10b-5p	Crkl	12929	ENSMUSG00000006134	-0.244
targetscan	MIMAT0000208	mmu-miR-10b-5p	Cfhr1	50702	ENSMUSG00000057037	-0.243
targetscan	MIMAT0000208	mmu-miR-10b-5p	Dusp11	72102	ENSMUSG00000030002	-0.243
targetscan	MIMAT0000208	mmu-miR-10b-5p	Ccdc85b	240514	ENSMUSG00000095098	-0.243
targetscan	MIMAT0000208	mmu-miR-10b-5p	Met	17295	ENSMUSG00000009376	-0.243
targetscan	MIMAT0000208	mmu-miR-10b-5p	Ecm2	407800	ENSMUSG00000043631	-0.243
targetscan	MIMAT0000208	mmu-miR-10b-5p	Rtkn2	170799	ENSMUSG00000037846	-0.243
targetscan	MIMAT0000208	mmu-miR-10b-5p	Ttc17	74569	ENSMUSG00000027194	-0.242
targetscan	MIMAT0000208	mmu-miR-10b-5p	Nxph1	18231	ENSMUSG00000046178	-0.242
targetscan	MIMAT0000208	mmu-miR-10b-5p	Papd5	214627	ENSMUSG00000036779	-0.242
targetscan	MIMAT0000208	mmu-miR-10b-5p	Pdf	68023	ENSMUSG00000078931	-0.242
targetscan	MIMAT0000208	mmu-miR-10b-5p	Cd247	12503	ENSMUSG00000005763	-0.241
targetscan	MIMAT0000208	mmu-miR-10b-5p	Neu1	18010	ENSMUSG00000007038	-0.241
targetscan	MIMAT0000208	mmu-miR-10b-5p	Trappc9	76510	ENSMUSG00000047921	-0.24
targetscan	MIMAT0000208	mmu-miR-10b-5p	Ormdl1	227102	ENSMUSG00000026097	-0.24
targetscan	MIMAT0000208	mmu-miR-10b-5p	Chst2	54371	ENSMUSG00000033350	-0.24
targetscan	MIMAT0000208	mmu-miR-10b-5p	Dock11	75974	ENSMUSG00000031093	-0.24
targetscan	MIMAT0000208	mmu-miR-10b-5p	4930519G04Rik	67593	ENSMUSG00000029564	-0.24
targetscan	MIMAT0000208	mmu-miR-10b-5p	Psmb11	73902	ENSMUSG00000072423	-0.24
targetscan	MIMAT0000208	mmu-miR-10b-5p	Kif5c	16574	ENSMUSG00000026764	-0.24

## Sheet: mmu-miR-15a-5p
database	mature_mirna_acc	mature_mirna_id	target_symbol	target_entrez	target_ensembl	score
diana_microt	MIMAT0000526	mmu-miR-15a-5p	R3hdm2	71750	ENSMUSG00000025404	1
diana_microt	MIMAT0000526	mmu-miR-15a-5p	Kif23	71819	ENSMUSG00000032254	1
diana_microt	MIMAT0000526	mmu-miR-15a-5p	Akt3	23797	ENSMUSG00000019699	1
diana_microt	MIMAT0000526	mmu-miR-15a-5p	Tspyl2	52808	ENSMUSG00000041096	1
diana_microt	MIMAT0000526	mmu-miR-15a-5p	Mgat4a	269181	ENSMUSG00000026110	1
diana_microt	MIMAT0000526	mmu-miR-15a-5p	Cttnbp2	30785	ENSMUSG00000000416	1
diana_microt	MIMAT0000526	mmu-miR-15a-5p	Cpeb2	231207	ENSMUSG00000039782	1
diana_microt	MIMAT0000526	mmu-miR-15a-5p	Zbtb34	241311	ENSMUSG00000068966	1
diana_microt	MIMAT0000526	mmu-miR-15a-5p	Pnpla6	50767	ENSMUSG00000004565	1
diana_microt	MIMAT0000526	mmu-miR-15a-5p	Cacul1	78832	ENSMUSG00000033417	1
diana_microt	MIMAT0000526	mmu-miR-15a-5p	Sall1	58198	ENSMUSG00000031665	1
diana_microt	MIMAT0000526	mmu-miR-15a-5p	Ccne1	12447	ENSMUSG00000002068	1
diana_microt	MIMAT0000526	mmu-miR-15a-5p	1700025G04Rik	69399	ENSMUSG00000032666	1
diana_microt	MIMAT0000526	mmu-miR-15a-5p	Prdm4	72843	ENSMUSG00000035529	1
diana_microt	MIMAT0000526	mmu-miR-15a-5p	Rasgef1b	320292	ENSMUSG00000029333	1
diana_microt	MIMAT0000526	mmu-miR-15a-5p	Omg	18377	ENSMUSG00000049612	1
diana_microt	MIMAT0000526	mmu-miR-15a-5p	9330154J02Rik		ENSMUSG00000056031	1
diana_microt	MIMAT0000526	mmu-miR-15a-5p	Ash1l	192195	ENSMUSG00000028053	1
diana_microt	MIMAT0000526	mmu-miR-15a-5p	E2f3	13557	ENSMUSG00000016477	0.999
diana_microt	MIMAT0000526	mmu-miR-15a-5p	Vegfa	22339	ENSMUSG00000023951	0.999
diana_microt	MIMAT0000526	mmu-miR-15a-5p	Cd2ap	12488	ENSMUSG00000061665	0.999
diana_microt	MIMAT0000526	mmu-miR-15a-5p	Rab9b	319642	ENSMUSG00000043463	0.999
diana_microt	MIMAT0000526	mmu-miR-15a-5p	Cdk17	237459	ENSMUSG00000020015	0.999
diana_microt	MIMAT0000526	mmu-miR-15a-5p	Fbxw7	50754	ENSMUSG00000028086	0.999
diana_microt	MIMAT0000526	mmu-miR-15a-5p	Rbm6	19654	ENSMUSG00000032582	0.999
diana_microt	MIMAT0000526	mmu-miR-15a-5p	Kif5c	16574	ENSMUSG00000026764	0.999
diana_microt	MIMAT0000526	mmu-miR-15a-5p	Btrc	12234	ENSMUSG00000025217	0.999
diana_microt	MIMAT0000526	mmu-miR-15a-5p	Tlk1	228012	ENSMUSG00000041997	0.999
diana_microt	MIMAT0000526	mmu-miR-15a-5p	Chek1	12649	ENSMUSG00000032113	0.999
diana_microt	MIMAT0000526	mmu-miR-15a-5p	Slc20a2	20516	ENSMUSG00000037656	0.998
diana_microt	MIMAT0000526	mmu-miR-15a-5p	Med26	70625	ENSMUSG00000045248	0.998
diana_microt	MIMAT0000526	mmu-miR-15a-5p	Rreb1	68750	ENSMUSG00000039087	0.998
diana_microt	MIMAT0000526	mmu-miR-15a-5p	Zfp622	52521	ENSMUSG00000052253	0.998
diana_microt	MIMAT0000526	mmu-miR-15a-5p	Cdc37l1	67072	ENSMUSG00000024780	0.998
diana_microt	MIMAT0000526	mmu-miR-15a-5p	Mob4	19070	ENSMUSG00000025979	0.998
diana_microt	MIMAT0000526	mmu-miR-15a-5p	Ppm1d	53892	ENSMUSG00000020525	0.998
diana_microt	MIMAT0000526	mmu-miR-15a-5p	N4bp1	80750	ENSMUSG00000031652	0.998
diana_microt	MIMAT0000526	mmu-miR-15a-5p	Ski	20481	ENSMUSG00000029050	0.998
diana_microt	MIMAT0000526	mmu-miR-15a-5p	Ubr3	68795	ENSMUSG00000044308	0.998
diana_microt	MIMAT0000526	mmu-miR-15a-5p	Gm20408	100126765	ENSMUSG00000092322	0.998
diana_microt	MIMAT0000526	mmu-miR-15a-5p	Atxn2	20239	ENSMUSG00000042605	0.998
diana_microt	MIMAT0000526	mmu-miR-15a-5p	Mob3b	214944	ENSMUSG00000073910	0.998
diana_microt	MIMAT0000526	mmu-miR-15a-5p	Tenm2	23964	ENSMUSG00000049336	0.998
diana_microt	MIMAT0000526	mmu-miR-15a-5p	Golga1	76899	ENSMUSG00000026754	0.997
diana_microt	MIMAT0000526	mmu-miR-15a-5p	Kif21a	16564	ENSMUSG00000022629	0.997
diana_microt	MIMAT0000526	mmu-miR-15a-5p	Zmym2	76007	ENSMUSG00000021945	0.997
diana_microt	MIMAT0000526	mmu-miR-15a-5p	Smad7	17131	ENSMUSG00000025880	0.997
diana_microt	MIMAT0000526	mmu-miR-15a-5p	Wipi2	74781	ENSMUSG00000029578	0.997
diana_microt	MIMAT0000526	mmu-miR-15a-5p	Nos1	18125	ENSMUSG00000029361	0.997
diana_microt	MIMAT0000526	mmu-miR-15a-5p	Arhgap20	244867	ENSMUSG00000053199	0.997
diana_microt	MIMAT0000526	mmu-miR-15a-5p	Col12a1	12816	ENSMUSG00000032332	0.997
diana_microt	MIMAT0000526	mmu-miR-15a-5p	Srpr	67398	ENSMUSG00000032042	0.997
diana_microt	MIMAT0000526	mmu-miR-15a-5p	Nynrin	277154	ENSMUSG00000075592	0.997
diana_microt	MIMAT0000526	mmu-miR-15a-5p	Rsbn1	229675	ENSMUSG00000044098	0.996
diana_microt	MIMAT0000526	mmu-miR-15a-5p	Pex13	101056392	ENSMUSG00000020283	0.996
diana_microt	MIMAT0000526	mmu-miR-15a-5p	Pappa	18491	ENSMUSG00000028370	0.996
diana_microt	MIMAT0000526	mmu-miR-15a-5p	Eya1	14048	ENSMUSG00000025932	0.996
diana_microt	MIMAT0000526	mmu-miR-15a-5p	Pex13	72129	ENSMUSG00000020283	0.996
diana_microt	MIMAT0000526	mmu-miR-15a-5p	Tle4	21888	ENSMUSG00000024642	0.996
diana_microt	MIMAT0000526	mmu-miR-15a-5p	Zhx3	320799	ENSMUSG00000035877	0.996
diana_microt	MIMAT0000526	mmu-miR-15a-5p	Usp25	30940	ENSMUSG00000022867	0.996
diana_microt	MIMAT0000526	mmu-miR-15a-5p	Bicd1	12121	ENSMUSG00000003452	0.995
diana_microt	MIMAT0000526	mmu-miR-15a-5p	Pth	19226	ENSMUSG00000059077	0.995
diana_microt	MIMAT0000526	mmu-miR-15a-5p	Ythdc1	231386	ENSMUSG00000035851	0.995
diana_microt	MIMAT0000526	mmu-miR-15a-5p	Myb	17863	ENSMUSG00000019982	0.995
diana_microt	MIMAT0000526	mmu-miR-15a-5p	Ghr	14600	ENSMUSG00000055737	0.995
diana_microt	MIMAT0000526	mmu-miR-15a-5p	Fosl2	14284	ENSMUSG00000029135	0.995
diana_microt	MIMAT0000526	mmu-miR-15a-5p	Dclk1	13175	ENSMUSG00000027797	0.995
diana_microt	MIMAT0000526	mmu-miR-15a-5p	Reck	53614	ENSMUSG00000028476	0.995
diana_microt	MIMAT0000526	mmu-miR-15a-5p	Cul2	71745	ENSMUSG00000024231	0.995
diana_microt	MIMAT0000526	mmu-miR-15a-5p	Rbms1	56878	ENSMUSG00000026970	0.995
diana_microt	MIMAT0000526	mmu-miR-15a-5p	Rfx3	19726	ENSMUSG00000040929	0.994
diana_microt	MIMAT0000526	mmu-miR-15a-5p	Rnf138	56515	ENSMUSG00000024317	0.994
diana_microt	MIMAT0000526	mmu-miR-15a-5p	Epb4.1l4b	54357	ENSMUSG00000028434	0.994
diana_microt	MIMAT0000526	mmu-miR-15a-5p	Socs6	54607	ENSMUSG00000056153	0.994
diana_microt	MIMAT0000526	mmu-miR-15a-5p	Sgk1	20393	ENSMUSG00000019970	0.994
diana_microt	MIMAT0000526	mmu-miR-15a-5p	Lhx4	16872	ENSMUSG00000026468	0.994
diana_microt	MIMAT0000526	mmu-miR-15a-5p	Aqp11	66333	ENSMUSG00000042797	0.994
diana_microt	MIMAT0000526	mmu-miR-15a-5p	Ccdc19	71870	ENSMUSG00000026546	0.993
diana_microt	MIMAT0000526	mmu-miR-15a-5p	Tnrc6b	213988	ENSMUSG00000047888	0.993
diana_microt	MIMAT0000526	mmu-miR-15a-5p	Sel1l3	231238	ENSMUSG00000029189	0.993
diana_microt	MIMAT0000526	mmu-miR-15a-5p	8430427H17Rik	329540	ENSMUSG00000061411	0.993
diana_microt	MIMAT0000526	mmu-miR-15a-5p	Sema6d	214968	ENSMUSG00000027200	0.993
diana_microt	MIMAT0000526	mmu-miR-15a-5p	Dyrk1b	13549	ENSMUSG00000002409	0.993
diana_microt	MIMAT0000526	mmu-miR-15a-5p	Rev3l	19714	ENSMUSG00000019841	0.993
diana_microt	MIMAT0000526	mmu-miR-15a-5p	Trabd2b	666048	ENSMUSG00000070867	0.993
diana_microt	MIMAT0000526	mmu-miR-15a-5p	Stox2	71069	ENSMUSG00000038143	0.992
diana_microt	MIMAT0000526	mmu-miR-15a-5p	Tmem55a	72519	ENSMUSG00000028221	0.992
diana_microt	MIMAT0000526	mmu-miR-15a-5p	Capza2	12343	ENSMUSG00000015733	0.991
diana_microt	MIMAT0000526	mmu-miR-15a-5p	Acsl4	50790	ENSMUSG00000031278	0.991
diana_microt	MIMAT0000526	mmu-miR-15a-5p	Arl2	56327	ENSMUSG00000024944	0.991
diana_microt	MIMAT0000526	mmu-miR-15a-5p	Mybl1	17864	ENSMUSG00000025912	0.991
diana_microt	MIMAT0000526	mmu-miR-15a-5p	Cdc25a	12530	ENSMUSG00000032477	0.99
diana_microt	MIMAT0000526	mmu-miR-15a-5p	Phip	83946	ENSMUSG00000032253	0.99
diana_microt	MIMAT0000526	mmu-miR-15a-5p	Acvr2a	11480	ENSMUSG00000052155	0.99
diana_microt	MIMAT0000526	mmu-miR-15a-5p	Bcl2	12043	ENSMUSG00000057329	0.99
diana_microt	MIMAT0000526	mmu-miR-15a-5p	Wnt7a	22421	ENSMUSG00000030093	0.989
diana_microt	MIMAT0000526	mmu-miR-15a-5p	Sobp	109205	ENSMUSG00000038248	0.989
diana_microt	MIMAT0000526	mmu-miR-15a-5p	Garem	381126	ENSMUSG00000042680	0.989
diana_microt	MIMAT0000526	mmu-miR-15a-5p	Prkar2a	19087	ENSMUSG00000032601	0.989
diana_microt	MIMAT0000526	mmu-miR-15a-5p	Pacsin2	23970	ENSMUSG00000016664	0.988
diana_microt	MIMAT0000526	mmu-miR-15a-5p	Wnt3a	22416	ENSMUSG00000009900	0.988
diana_microt	MIMAT0000526	mmu-miR-15a-5p	Ficd	231630	ENSMUSG00000053334	0.988
diana_microt	MIMAT0000526	mmu-miR-15a-5p	Rfx5	53970	ENSMUSG00000005774	0.988
diana_microt	MIMAT0000526	mmu-miR-15a-5p	Strbp	20744	ENSMUSG00000026915	0.987
diana_microt	MIMAT0000526	mmu-miR-15a-5p	Zfhx4	80892	ENSMUSG00000025255	0.987
diana_microt	MIMAT0000526	mmu-miR-15a-5p	Islr	26968	ENSMUSG00000037206	0.987
diana_microt	MIMAT0000526	mmu-miR-15a-5p	Epha7	13841	ENSMUSG00000028289	0.987
diana_microt	MIMAT0000526	mmu-miR-15a-5p	Ddx3x	13205	ENSMUSG00000000787	0.987
diana_microt	MIMAT0000526	mmu-miR-15a-5p	Zfp362	230761	ENSMUSG00000028799	0.986
diana_microt	MIMAT0000526	mmu-miR-15a-5p	Spag7	216873	ENSMUSG00000018287	0.986
diana_microt	MIMAT0000526	mmu-miR-15a-5p	Fbxo21	231670	ENSMUSG00000032898	0.986
diana_microt	MIMAT0000526	mmu-miR-15a-5p	Ccnt2	72949	ENSMUSG00000026349	0.986
diana_microt	MIMAT0000526	mmu-miR-15a-5p	Zbtb39	320080	ENSMUSG00000044617	0.986
diana_microt	MIMAT0000526	mmu-miR-15a-5p	Dcaf7	71833	ENSMUSG00000049354	0.984
diana_microt	MIMAT0000526	mmu-miR-15a-5p	Nbeal1	269198	ENSMUSG00000073664	0.984
diana_microt	MIMAT0000526	mmu-miR-15a-5p	Ccnd2	12444	ENSMUSG00000000184	0.984
diana_microt	MIMAT0000526	mmu-miR-15a-5p	Ptpn3	545622	ENSMUSG00000038764	0.984
diana_microt	MIMAT0000526	mmu-miR-15a-5p	Crebrf	77128	ENSMUSG00000048249	0.984
diana_microt	MIMAT0000526	mmu-miR-15a-5p	Smurf1	75788	ENSMUSG00000038780	0.983
diana_microt	MIMAT0000526	mmu-miR-15a-5p	Cldn12	64945	ENSMUSG00000046798	0.983
diana_microt	MIMAT0000526	mmu-miR-15a-5p	Uhmk1	16589	ENSMUSG00000026667	0.982
diana_microt	MIMAT0000526	mmu-miR-15a-5p	Pik3r1	18708	ENSMUSG00000041417	0.982
diana_microt	MIMAT0000526	mmu-miR-15a-5p	Raf1	110157	ENSMUSG00000000441	0.981
diana_microt	MIMAT0000526	mmu-miR-15a-5p	Mknk1	17346	ENSMUSG00000028708	0.98
diana_microt	MIMAT0000526	mmu-miR-15a-5p	Ihh	16147	ENSMUSG00000006538	0.98
diana_microt	MIMAT0000526	mmu-miR-15a-5p	Il10ra	16154	ENSMUSG00000032089	0.98
diana_microt	MIMAT0000526	mmu-miR-15a-5p	Pthlh	19227	ENSMUSG00000048776	0.98
diana_microt	MIMAT0000526	mmu-miR-15a-5p	Htr4	15562	ENSMUSG00000026322	0.98
diana_microt	MIMAT0000526	mmu-miR-15a-5p	Cbfa2t3	12398	ENSMUSG00000006362	0.98
diana_microt	MIMAT0000526	mmu-miR-15a-5p	Pcdha10	192161	ENSMUSG00000007440	0.979
diana_microt	MIMAT0000526	mmu-miR-15a-5p	Pcdha4	12936	ENSMUSG00000007440	0.979
diana_microt	MIMAT0000526	mmu-miR-15a-5p	Pcdhac2	192164	ENSMUSG00000007440	0.979
diana_microt	MIMAT0000526	mmu-miR-15a-5p	Pcdha10	12942	ENSMUSG00000007440	0.979
diana_microt	MIMAT0000526	mmu-miR-15a-5p	Pcdha2	353234	ENSMUSG00000007440	0.979
diana_microt	MIMAT0000526	mmu-miR-15a-5p	Pcdhac2	12943	ENSMUSG00000007440	0.979
diana_microt	MIMAT0000526	mmu-miR-15a-5p	Pcdha1	353236	ENSMUSG00000007440	0.979
diana_microt	MIMAT0000526	mmu-miR-15a-5p	Pcdha2	116731	ENSMUSG00000007440	0.979
diana_microt	MIMAT0000526	mmu-miR-15a-5p	Pcdhac1	353237	ENSMUSG00000007440	0.979
diana_microt	MIMAT0000526	mmu-miR-15a-5p	Pcdha1	192161	ENSMUSG00000007440	0.979
diana_microt	MIMAT0000526	mmu-miR-15a-5p	Pcdha2	12936	ENSMUSG00000007440	0.979
diana_microt	MIMAT0000526	mmu-miR-15a-5p	Pcdhac1	192164	ENSMUSG00000007440	0.979
diana_microt	MIMAT0000526	mmu-miR-15a-5p	Pcdha1	12942	ENSMUSG00000007440	0.979
diana_microt	MIMAT0000526	mmu-miR-15a-5p	Pcdha12	353234	ENSMUSG00000007440	0.979
diana_microt	MIMAT0000526	mmu-miR-15a-5p	Pcdhac1	12943	ENSMUSG00000007440	0.979
diana_microt	MIMAT0000526	mmu-miR-15a-5p	Pcdha12	116731	ENSMUSG00000007440	0.979
diana_microt	MIMAT0000526	mmu-miR-15a-5p	Pcdha5	353237	ENSMUSG00000007440	0.979
diana_microt	MIMAT0000526	mmu-miR-15a-5p	Pcdha12	12936	ENSMUSG00000007440	0.979
diana_microt	MIMAT0000526	mmu-miR-15a-5p	Pcdha5	192164	ENSMUSG00000007440	0.979
diana_microt	MIMAT0000526	mmu-miR-15a-5p	Pcdha11	353234	ENSMUSG00000007440	0.979
diana_microt	MIMAT0000526	mmu-miR-15a-5p	Pcdha5	12943	ENSMUSG00000007440	0.979
diana_microt	MIMAT0000526	mmu-miR-15a-5p	Pcdha9	353236	ENSMUSG00000007440	0.979
diana_microt	MIMAT0000526	mmu-miR-15a-5p	Pcdha11	116731	ENSMUSG00000007440	0.979
diana_microt	MIMAT0000526	mmu-miR-15a-5p	Pcdha4	353237	ENSMUSG00000007440	0.979
diana_microt	MIMAT0000526	mmu-miR-15a-5p	Pcdha9	192161	ENSMUSG00000007440	0.979
diana_microt	MIMAT0000526	mmu-miR-15a-5p	Pcdha11	12936	ENSMUSG00000007440	0.979
diana_microt	MIMAT0000526	mmu-miR-15a-5p	Pcdha4	192164	ENSMUSG00000007440	0.979
diana_microt	MIMAT0000526	mmu-miR-15a-5p	Pcdha9	12942	ENSMUSG00000007440	0.979
diana_microt	MIMAT0000526	mmu-miR-15a-5p	Polr3f	70408	ENSMUSG00000027427	0.979
diana_microt	MIMAT0000526	mmu-miR-15a-5p	Pcdha10	353234	ENSMUSG00000007440	0.979
diana_microt	MIMAT0000526	mmu-miR-15a-5p	Pcdha4	12943	ENSMUSG00000007440	0.979
diana_microt	MIMAT0000526	mmu-miR-15a-5p	Pcdhac2	353236	ENSMUSG00000007440	0.979
diana_microt	MIMAT0000526	mmu-miR-15a-5p	Pcdha10	116731	ENSMUSG00000007440	0.979
diana_microt	MIMAT0000526	mmu-miR-15a-5p	Pcdha2	353237	ENSMUSG00000007440	0.979
diana_microt	MIMAT0000526	mmu-miR-15a-5p	Pcdhac2	192161	ENSMUSG00000007440	0.979
diana_microt	MIMAT0000526	mmu-miR-15a-5p	Pcdha10	12936	ENSMUSG00000007440	0.979
diana_microt	MIMAT0000526	mmu-miR-15a-5p	Pcdha2	192164	ENSMUSG00000007440	0.979
diana_microt	MIMAT0000526	mmu-miR-15a-5p	Pcdhac2	12942	ENSMUSG00000007440	0.979
diana_microt	MIMAT0000526	mmu-miR-15a-5p	Pcdha1	353234	ENSMUSG00000007440	0.979
diana_microt	MIMAT0000526	mmu-miR-15a-5p	Pcdha2	12943	ENSMUSG00000007440	0.979
diana_microt	MIMAT0000526	mmu-miR-15a-5p	Pcdhac1	353236	ENSMUSG00000007440	0.979
diana_microt	MIMAT0000526	mmu-miR-15a-5p	Pcdha1	116731	ENSMUSG00000007440	0.979
diana_microt	MIMAT0000526	mmu-miR-15a-5p	Pcdha12	353237	ENSMUSG00000007440	0.979
diana_microt	MIMAT0000526	mmu-miR-15a-5p	Pcdhac1	192161	ENSMUSG00000007440	0.979
diana_microt	MIMAT0000526	mmu-miR-15a-5p	Pcdha1	12936	ENSMUSG00000007440	0.979
diana_microt	MIMAT0000526	mmu-miR-15a-5p	Pcdha12	192164	ENSMUSG00000007440	0.979
diana_microt	MIMAT0000526	mmu-miR-15a-5p	Pcdhac1	12942	ENSMUSG00000007440	0.979
diana_microt	MIMAT0000526	mmu-miR-15a-5p	Pcdha12	12943	ENSMUSG00000007440	0.979
diana_microt	MIMAT0000526	mmu-miR-15a-5p	Pcdha5	353236	ENSMUSG00000007440	0.979
diana_microt	MIMAT0000526	mmu-miR-15a-5p	Pcdha11	353237	ENSMUSG00000007440	0.979
diana_microt	MIMAT0000526	mmu-miR-15a-5p	Pcdha5	192161	ENSMUSG00000007440	0.979
diana_microt	MIMAT0000526	mmu-miR-15a-5p	Pcdha11	192164	ENSMUSG00000007440	0.979
diana_microt	MIMAT0000526	mmu-miR-15a-5p	Pcdha5	12942	ENSMUSG00000007440	0.979
diana_microt	MIMAT0000526	mmu-miR-15a-5p	Pcdha9	353234	ENSMUSG00000007440	0.979
diana_microt	MIMAT0000526	mmu-miR-15a-5p	Pcdha11	12943	ENSMUSG00000007440	0.979
diana_microt	MIMAT0000526	mmu-miR-15a-5p	Pcdha4	353236	ENSMUSG00000007440	0.979
diana_microt	MIMAT0000526	mmu-miR-15a-5p	Pcdha9	116731	ENSMUSG00000007440	0.979
diana_microt	MIMAT0000526	mmu-miR-15a-5p	Pcdha10	353237	ENSMUSG00000007440	0.979
diana_microt	MIMAT0000526	mmu-miR-15a-5p	Pcdha4	192161	ENSMUSG00000007440	0.979
diana_microt	MIMAT0000526	mmu-miR-15a-5p	Pcdha9	12936	ENSMUSG00000007440	0.979
diana_microt	MIMAT0000526	mmu-miR-15a-5p	Pcdha10	192164	ENSMUSG00000007440	0.979
diana_microt	MIMAT0000526	mmu-miR-15a-5p	Pcdha4	12942	ENSMUSG00000007440	0.979
diana_microt	MIMAT0000526	mmu-miR-15a-5p	Pcdhac2	353234	ENSMUSG00000007440	0.979
diana_microt	MIMAT0000526	mmu-miR-15a-5p	Pcdha10	12943	ENSMUSG00000007440	0.979
diana_microt	MIMAT0000526	mmu-miR-15a-5p	Pcdha2	353236	ENSMUSG00000007440	0.979
diana_microt	MIMAT0000526	mmu-miR-15a-5p	Pcdhac2	116731	ENSMUSG00000007440	0.979
diana_microt	MIMAT0000526	mmu-miR-15a-5p	Pcdha1	353237	ENSMUSG00000007440	0.979
diana_microt	MIMAT0000526	mmu-miR-15a-5p	Pcdha2	192161	ENSMUSG00000007440	0.979
diana_microt	MIMAT0000526	mmu-miR-15a-5p	Pcdhac2	12936	ENSMUSG00000007440	0.979
diana_microt	MIMAT0000526	mmu-miR-15a-5p	Pcdha1	192164	ENSMUSG00000007440	0.979
diana_microt	MIMAT0000526	mmu-miR-15a-5p	Pcdha2	12942	ENSMUSG00000007440	0.979
diana_microt	MIMAT0000526	mmu-miR-15a-5p	Pcdhac1	353234	ENSMUSG00000007440	0.979
diana_microt	MIMAT0000526	mmu-miR-15a-5p	Pcdha1	12943	ENSMUSG00000007440	0.979
diana_microt	MIMAT0000526	mmu-miR-15a-5p	Pcdha12	353236	ENSMUSG00000007440	0.979
diana_microt	MIMAT0000526	mmu-miR-15a-5p	Pcdhac1	116731	ENSMUSG00000007440	0.979
diana_microt	MIMAT0000526	mmu-miR-15a-5p	Pcdha12	192161	ENSMUSG00000007440	0.979
diana_microt	MIMAT0000526	mmu-miR-15a-5p	Pcdhac1	12936	ENSMUSG00000007440	0.979
diana_microt	MIMAT0000526	mmu-miR-15a-5p	Pcdha12	12942	ENSMUSG00000007440	0.979
diana_microt	MIMAT0000526	mmu-miR-15a-5p	Pcdha5	353234	ENSMUSG00000007440	0.979
diana_microt	MIMAT0000526	mmu-miR-15a-5p	Pcdha11	353236	ENSMUSG00000007440	0.979
diana_microt	MIMAT0000526	mmu-miR-15a-5p	Pcdha5	116731	ENSMUSG00000007440	0.979
diana_microt	MIMAT0000526	mmu-miR-15a-5p	Pcdha9	353237	ENSMUSG00000007440	0.979
diana_microt	MIMAT0000526	mmu-miR-15a-5p	Pcdha11	192161	ENSMUSG00000007440	0.979
diana_microt	MIMAT0000526	mmu-miR-15a-5p	Pcdha5	12936	ENSMUSG00000007440	0.979
diana_microt	MIMAT0000526	mmu-miR-15a-5p	Pcdha9	192164	ENSMUSG00000007440	0.979
diana_microt	MIMAT0000526	mmu-miR-15a-5p	Pcdha11	12942	ENSMUSG00000007440	0.979
diana_microt	MIMAT0000526	mmu-miR-15a-5p	Pcdha4	353234	ENSMUSG00000007440	0.979
diana_microt	MIMAT0000526	mmu-miR-15a-5p	Pcdha9	12943	ENSMUSG00000007440	0.979
diana_microt	MIMAT0000526	mmu-miR-15a-5p	Pcdha10	353236	ENSMUSG00000007440	0.979
diana_microt	MIMAT0000526	mmu-miR-15a-5p	Pcdha4	116731	ENSMUSG00000007440	0.979
diana_microt	MIMAT0000526	mmu-miR-15a-5p	Pcdhac2	353237	ENSMUSG00000007440	0.979
diana_microt	MIMAT0000526	mmu-miR-15a-5p	Atp1b4	67821	ENSMUSG00000016327	0.978
diana_microt	MIMAT0000526	mmu-miR-15a-5p	Atxn7l1	380753	ENSMUSG00000020564	0.977
diana_microt	MIMAT0000526	mmu-miR-15a-5p	Gm15800	269700	ENSMUSG00000042744	0.976
diana_microt	MIMAT0000526	mmu-miR-15a-5p	Tmem55b	219024	ENSMUSG00000035953	0.976
diana_microt	MIMAT0000526	mmu-miR-15a-5p	Actr2	66713	ENSMUSG00000020152	0.976
diana_microt	MIMAT0000526	mmu-miR-15a-5p	Snrk	20623	ENSMUSG00000038145	0.975
diana_microt	MIMAT0000526	mmu-miR-15a-5p	Hus1	15574	ENSMUSG00000020413	0.975
diana_microt	MIMAT0000526	mmu-miR-15a-5p	Mfn2	170731	ENSMUSG00000029020	0.975
diana_microt	MIMAT0000526	mmu-miR-15a-5p	Cdk5r1	12569	ENSMUSG00000048895	0.975
diana_microt	MIMAT0000526	mmu-miR-15a-5p	Lrp6	16974	ENSMUSG00000030201	0.975
diana_microt	MIMAT0000526	mmu-miR-15a-5p	Ubn2	320538	ENSMUSG00000038538	0.974
diana_microt	MIMAT0000526	mmu-miR-15a-5p	Luzp1	269593	ENSMUSG00000001089	0.974
diana_microt	MIMAT0000526	mmu-miR-15a-5p	Ttc14	67120	ENSMUSG00000027677	0.974
diana_microt	MIMAT0000526	mmu-miR-15a-5p	Dync1li2	234663	ENSMUSG00000035770	0.974
diana_microt	MIMAT0000526	mmu-miR-15a-5p	Slc25a22	68267	ENSMUSG00000019082	0.974
diana_microt	MIMAT0000526	mmu-miR-15a-5p	Jarid2	16468	ENSMUSG00000038518	0.973
diana_microt	MIMAT0000526	mmu-miR-15a-5p	Sema3a	20346	ENSMUSG00000028883	0.973
diana_microt	MIMAT0000526	mmu-miR-15a-5p	Pura	19290	ENSMUSG00000043991	0.973
diana_microt	MIMAT0000526	mmu-miR-15a-5p	Qk	19317	ENSMUSG00000062078	0.972
diana_microt	MIMAT0000526	mmu-miR-15a-5p	Cdc27	217232	ENSMUSG00000020687	0.971
diana_microt	MIMAT0000526	mmu-miR-15a-5p	Irak2	108960	ENSMUSG00000060477	0.971
diana_microt	MIMAT0000526	mmu-miR-15a-5p	Tgif2	228839	ENSMUSG00000062175	0.971
diana_microt	MIMAT0000526	mmu-miR-15a-5p	Dixdc1	330938	ENSMUSG00000032064	0.97
diana_microt	MIMAT0000526	mmu-miR-15a-5p	Mapkap1	227743	ENSMUSG00000038696	0.969
diana_microt	MIMAT0000526	mmu-miR-15a-5p	Ywhah	22629	ENSMUSG00000018965	0.969
diana_microt	MIMAT0000526	mmu-miR-15a-5p	Plcxd2	433022	ENSMUSG00000087141	0.969
diana_microt	MIMAT0000526	mmu-miR-15a-5p	Maob	109731	ENSMUSG00000040147	0.969
diana_microt	MIMAT0000526	mmu-miR-15a-5p	Pafah1b1	18472	ENSMUSG00000020745	0.969
diana_microt	MIMAT0000526	mmu-miR-15a-5p	Cnot6l	231464	ENSMUSG00000034724	0.968
diana_microt	MIMAT0000526	mmu-miR-15a-5p	Vps33b	233405	ENSMUSG00000030534	0.966
diana_microt	MIMAT0000526	mmu-miR-15a-5p	Ubxn10	212190	ENSMUSG00000043621	0.965
diana_microt	MIMAT0000526	mmu-miR-15a-5p	Kcnj2	16518	ENSMUSG00000041695	0.965
diana_microt	MIMAT0000526	mmu-miR-15a-5p	Myt1l	17933	ENSMUSG00000061911	0.965
diana_microt	MIMAT0000526	mmu-miR-15a-5p	Gm9732	101056186	ENSMUSG00000090440	0.965
diana_microt	MIMAT0000526	mmu-miR-15a-5p	Cacna2d1	12293	ENSMUSG00000040118	0.964
diana_microt	MIMAT0000526	mmu-miR-15a-5p	Cpeb3	208922	ENSMUSG00000039652	0.964
diana_microt	MIMAT0000526	mmu-miR-15a-5p	Pnoc	18155	ENSMUSG00000045731	0.964
diana_microt	MIMAT0000526	mmu-miR-15a-5p	Srpk1	20815	ENSMUSG00000004865	0.963
diana_microt	MIMAT0000526	mmu-miR-15a-5p	Cc2d1b	319965	ENSMUSG00000028582	0.962
diana_microt	MIMAT0000526	mmu-miR-15a-5p	Akap7	432442	ENSMUSG00000039166	0.961
diana_microt	MIMAT0000526	mmu-miR-15a-5p	Wbp1l	226178	ENSMUSG00000047731	0.96
diana_microt	MIMAT0000526	mmu-miR-15a-5p	Map2k1	26395	ENSMUSG00000004936	0.959
diana_microt	MIMAT0000526	mmu-miR-15a-5p	Nfatc3	18021	ENSMUSG00000031902	0.958
diana_microt	MIMAT0000526	mmu-miR-15a-5p	Rlim	19820	ENSMUSG00000056537	0.958
diana_microt	MIMAT0000526	mmu-miR-15a-5p	Tnfrsf26	244237	ENSMUSG00000045362	0.957
diana_microt	MIMAT0000526	mmu-miR-15a-5p	Sez6l	56747	ENSMUSG00000058153	0.956
diana_microt	MIMAT0000526	mmu-miR-15a-5p	Btaf1	107182	ENSMUSG00000040565	0.954
diana_microt	MIMAT0000526	mmu-miR-15a-5p	Zfp449	78619	ENSMUSG00000073176	0.952
diana_microt	MIMAT0000526	mmu-miR-15a-5p	Rrnad1	229503	ENSMUSG00000004896	0.951
diana_microt	MIMAT0000526	mmu-miR-15a-5p	Clock	12753	ENSMUSG00000029238	0.951
diana_microt	MIMAT0000526	mmu-miR-15a-5p	Helz	78455	ENSMUSG00000020721	0.951
diana_microt	MIMAT0000526	mmu-miR-15a-5p	Ubfd1	28018	ENSMUSG00000030870	0.948
diana_microt	MIMAT0000526	mmu-miR-15a-5p	Gm5930		ENSMUSG00000079267	0.948
diana_microt	MIMAT0000526	mmu-miR-15a-5p	Chd2	244059	ENSMUSG00000078671	0.948
diana_microt	MIMAT0000526	mmu-miR-15a-5p	Zbtb44	235132	ENSMUSG00000047412	0.947
diana_microt	MIMAT0000526	mmu-miR-15a-5p	Ccdc6	76551	ENSMUSG00000048701	0.947
diana_microt	MIMAT0000526	mmu-miR-15a-5p	Kl	16591	ENSMUSG00000058488	0.946
diana_microt	MIMAT0000526	mmu-miR-15a-5p	Traf3	22031	ENSMUSG00000021277	0.946
diana_microt	MIMAT0000526	mmu-miR-15a-5p	Eif3a	13669	ENSMUSG00000024991	0.945
diana_microt	MIMAT0000526	mmu-miR-15a-5p	Mcu	215999	ENSMUSG00000009647	0.945
diana_microt	MIMAT0000526	mmu-miR-15a-5p	Gpatch8	237943	ENSMUSG00000034621	0.944
diana_microt	MIMAT0000526	mmu-miR-15a-5p	Ptch2	19207	ENSMUSG00000028681	0.944
diana_microt	MIMAT0000526	mmu-miR-15a-5p	Tmcc1	330401	ENSMUSG00000030126	0.943
diana_microt	MIMAT0000526	mmu-miR-15a-5p	Slc6a8	102857	ENSMUSG00000019558	0.943
diana_microt	MIMAT0000526	mmu-miR-15a-5p	Atxn7l3b	382423	ENSMUSG00000074748	0.943
diana_microt	MIMAT0000526	mmu-miR-15a-5p	Apln	30878	ENSMUSG00000037010	0.942
diana_microt	MIMAT0000526	mmu-miR-15a-5p	Il7r	16197	ENSMUSG00000003882	0.941
diana_microt	MIMAT0000526	mmu-miR-15a-5p	Dll1	13388	ENSMUSG00000014773	0.941
diana_microt	MIMAT0000526	mmu-miR-15a-5p	Pou2f1	18986	ENSMUSG00000026565	0.941
diana_microt	MIMAT0000526	mmu-miR-15a-5p	Tram1	72265	ENSMUSG00000025935	0.94
diana_microt	MIMAT0000526	mmu-miR-15a-5p	Atxn7l3	217218	ENSMUSG00000059995	0.94
diana_microt	MIMAT0000526	mmu-miR-15a-5p	Plxnc1	54712	ENSMUSG00000074785	0.94
diana_microt	MIMAT0000526	mmu-miR-15a-5p	Ak4	11639	ENSMUSG00000028527	0.94
diana_microt	MIMAT0000526	mmu-miR-15a-5p	Numb	18222	ENSMUSG00000021224	0.938
diana_microt	MIMAT0000526	mmu-miR-15a-5p	Wnt4	22417	ENSMUSG00000036856	0.937
diana_microt	MIMAT0000526	mmu-miR-15a-5p	2310047M10Rik	71923	ENSMUSG00000045176	0.937
diana_microt	MIMAT0000526	mmu-miR-15a-5p	Lsm11	72290	ENSMUSG00000044847	0.937
diana_microt	MIMAT0000526	mmu-miR-15a-5p	Spred1	114715	ENSMUSG00000027351	0.935
diana_microt	MIMAT0000526	mmu-miR-15a-5p	Dennd6a	211922	ENSMUSG00000040818	0.934
diana_microt	MIMAT0000526	mmu-miR-15a-5p	Dhx16	69192	ENSMUSG00000024422	0.934
diana_microt	MIMAT0000526	mmu-miR-15a-5p	Kdr	16542	ENSMUSG00000062960	0.933
diana_microt	MIMAT0000526	mmu-miR-15a-5p	Rnf111	93836	ENSMUSG00000032217	0.933
diana_microt	MIMAT0000526	mmu-miR-15a-5p	Fgf9	14180	ENSMUSG00000021974	0.933
diana_microt	MIMAT0000526	mmu-miR-15a-5p	Trank1	320429	ENSMUSG00000062296	0.933
diana_microt	MIMAT0000526	mmu-miR-15a-5p	Ist1	71955	ENSMUSG00000031729	0.933
diana_microt	MIMAT0000526	mmu-miR-15a-5p	E2f7	52679	ENSMUSG00000020185	0.932
diana_microt	MIMAT0000526	mmu-miR-15a-5p	Ankfy1	11736	ENSMUSG00000020790	0.932
diana_microt	MIMAT0000526	mmu-miR-15a-5p	Kif5b	16573	ENSMUSG00000006740	0.932
diana_microt	MIMAT0000526	mmu-miR-15a-5p	Ano3	228432	ENSMUSG00000074968	0.931
diana_microt	MIMAT0000526	mmu-miR-15a-5p	Gm5624		ENSMUSG00000092165	0.931
diana_microt	MIMAT0000526	mmu-miR-15a-5p	Kank1	107351	ENSMUSG00000032702	0.931
diana_microt	MIMAT0000526	mmu-miR-15a-5p	Phf19	74016	ENSMUSG00000026873	0.931
diana_microt	MIMAT0000526	mmu-miR-15a-5p	Rab10	19325	ENSMUSG00000020671	0.93
diana_microt	MIMAT0000526	mmu-miR-15a-5p	Gm8104		ENSMUSG00000096446	0.93
diana_microt	MIMAT0000526	mmu-miR-15a-5p	Dcp1a	75901	ENSMUSG00000021962	0.929
diana_microt	MIMAT0000526	mmu-miR-15a-5p	Mnt	17428	ENSMUSG00000000282	0.929
diana_microt	MIMAT0000526	mmu-miR-15a-5p	Nlrx1	270151	ENSMUSG00000032109	0.929
diana_microt	MIMAT0000526	mmu-miR-15a-5p	Fermt2	218952	ENSMUSG00000037712	0.929
diana_microt	MIMAT0000526	mmu-miR-15a-5p	Nrn1	68404	ENSMUSG00000039114	0.929
diana_microt	MIMAT0000526	mmu-miR-15a-5p	Gne	50798	ENSMUSG00000028479	0.928
diana_microt	MIMAT0000526	mmu-miR-15a-5p	Tbp	21374	ENSMUSG00000014767	0.928
diana_microt	MIMAT0000526	mmu-miR-15a-5p	Naa15	74838	ENSMUSG00000063273	0.928
diana_microt	MIMAT0000526	mmu-miR-15a-5p	Gm2832		ENSMUSG00000091110	0.927
diana_microt	MIMAT0000526	mmu-miR-15a-5p	Hs3st3b1	54710	ENSMUSG00000070407	0.926
diana_microt	MIMAT0000526	mmu-miR-15a-5p	Rnf144b	218215	ENSMUSG00000038068	0.926
diana_microt	MIMAT0000526	mmu-miR-15a-5p	Ahcyl1	229709	ENSMUSG00000027893	0.925
diana_microt	MIMAT0000526	mmu-miR-15a-5p	Lats1	16798	ENSMUSG00000040021	0.925
diana_microt	MIMAT0000526	mmu-miR-15a-5p	Wap	22373	ENSMUSG00000000381	0.925
diana_microt	MIMAT0000526	mmu-miR-15a-5p	Nebl	74103	ENSMUSG00000053702	0.924
diana_microt	MIMAT0000526	mmu-miR-15a-5p	Tut1	70044	ENSMUSG00000071645	0.924
diana_microt	MIMAT0000526	mmu-miR-15a-5p	Pvrl1	58235	ENSMUSG00000032012	0.924
diana_microt	MIMAT0000526	mmu-miR-15a-5p	Mylk4	238564	ENSMUSG00000044951	0.924
diana_microt	MIMAT0000526	mmu-miR-15a-5p	Cphx3	105594	ENSMUSG00000094817	0.923
diana_microt	MIMAT0000526	mmu-miR-15a-5p	Zfp367	238673	ENSMUSG00000044934	0.923
diana_microt	MIMAT0000526	mmu-miR-15a-5p	Ccnd3	12445	ENSMUSG00000034165	0.923
diana_microt	MIMAT0000526	mmu-miR-15a-5p	Cphx3	100039280	ENSMUSG00000094817	0.923
diana_microt	MIMAT0000526	mmu-miR-15a-5p	Cphx3	100039213	ENSMUSG00000094817	0.923
diana_microt	MIMAT0000526	mmu-miR-15a-5p	Usp31	76179	ENSMUSG00000063317	0.922
diana_microt	MIMAT0000526	mmu-miR-15a-5p	Capn6	12338	ENSMUSG00000067276	0.921
diana_microt	MIMAT0000526	mmu-miR-15a-5p	Plxna4	243743	ENSMUSG00000029765	0.92
diana_microt	MIMAT0000526	mmu-miR-15a-5p	Cd28	12487	ENSMUSG00000026012	0.92
diana_microt	MIMAT0000526	mmu-miR-15a-5p	Dcaf17	75763	ENSMUSG00000041966	0.919
diana_microt	MIMAT0000526	mmu-miR-15a-5p	Cmpk1	66588	ENSMUSG00000028719	0.919
diana_microt	MIMAT0000526	mmu-miR-15a-5p	Tbpl1	237336	ENSMUSG00000071359	0.917
diana_microt	MIMAT0000526	mmu-miR-15a-5p	Bptf	207165	ENSMUSG00000040481	0.916
diana_microt	MIMAT0000526	mmu-miR-15a-5p	Gm3371		ENSMUSG00000090716	0.915
diana_microt	MIMAT0000526	mmu-miR-15a-5p	Gm5475		ENSMUSG00000087444	0.915
diana_microt	MIMAT0000526	mmu-miR-15a-5p	Arhgef11	213498	ENSMUSG00000041977	0.915
diana_microt	MIMAT0000526	mmu-miR-15a-5p	Nup50	18141	ENSMUSG00000016619	0.915
diana_microt	MIMAT0000526	mmu-miR-15a-5p	Mov10	17454	ENSMUSG00000002227	0.915
diana_microt	MIMAT0000526	mmu-miR-15a-5p	Onecut2	225631	ENSMUSG00000045991	0.915
diana_microt	MIMAT0000526	mmu-miR-15a-5p	Insr	16337	ENSMUSG00000005534	0.915
diana_microt	MIMAT0000526	mmu-miR-15a-5p	Tnpo3	320938	ENSMUSG00000012535	0.914
diana_microt	MIMAT0000526	mmu-miR-15a-5p	Zfp592	233410	ENSMUSG00000005621	0.914
diana_microt	MIMAT0000526	mmu-miR-15a-5p	Gm7233	638262	ENSMUSG00000094151	0.914
diana_microt	MIMAT0000526	mmu-miR-15a-5p	5031414D18Rik	271221	ENSMUSG00000034959	0.914
diana_microt	MIMAT0000526	mmu-miR-15a-5p	Alg3	208624	ENSMUSG00000033809	0.912
diana_microt	MIMAT0000526	mmu-miR-15a-5p	Chpt1	212862	ENSMUSG00000060002	0.911
diana_microt	MIMAT0000526	mmu-miR-15a-5p	Kbtbd2	210973	ENSMUSG00000059486	0.911
diana_microt	MIMAT0000526	mmu-miR-15a-5p	Ago3	214150	ENSMUSG00000028842	0.911
diana_microt	MIMAT0000526	mmu-miR-15a-5p	Lurap1l	52829	ENSMUSG00000048706	0.911
diana_microt	MIMAT0000526	mmu-miR-15a-5p	Ahcyl2	74340	ENSMUSG00000029772	0.91
diana_microt	MIMAT0000526	mmu-miR-15a-5p	Gm5798		ENSMUSG00000094925	0.909
diana_microt	MIMAT0000526	mmu-miR-15a-5p	Pfas	237823	ENSMUSG00000020899	0.908
diana_microt	MIMAT0000526	mmu-miR-15a-5p	Wbp11	60321	ENSMUSG00000030216	0.908
diana_microt	MIMAT0000526	mmu-miR-15a-5p	Casr	12374	ENSMUSG00000051980	0.906
diana_microt	MIMAT0000526	mmu-miR-15a-5p	Dcun1d4	100737	ENSMUSG00000051674	0.905
diana_microt	MIMAT0000526	mmu-miR-15a-5p	Krt222	268481	ENSMUSG00000035849	0.905
diana_microt	MIMAT0000526	mmu-miR-15a-5p	Bcl2l2	12050	ENSMUSG00000089682	0.905
diana_microt	MIMAT0000526	mmu-miR-15a-5p	Bmpr1a	12166	ENSMUSG00000021796	0.904
diana_microt	MIMAT0000526	mmu-miR-15a-5p	Entpd7	93685	ENSMUSG00000025192	0.903
diana_microt	MIMAT0000526	mmu-miR-15a-5p	Smurf2	66313	ENSMUSG00000018363	0.903
diana_microt	MIMAT0000526	mmu-miR-15a-5p	Etnk1	75320	ENSMUSG00000030275	0.903
diana_microt	MIMAT0000526	mmu-miR-15a-5p	Klf14	619665	ENSMUSG00000073209	0.903
diana_microt	MIMAT0000526	mmu-miR-15a-5p	Sox6	20679	ENSMUSG00000051910	0.903
diana_microt	MIMAT0000526	mmu-miR-15a-5p	Akirin1	68050	ENSMUSG00000023075	0.902
diana_microt	MIMAT0000526	mmu-miR-15a-5p	Hoxa10	15395	ENSMUSG00000000938	0.902
diana_microt	MIMAT0000526	mmu-miR-15a-5p	Prdm11	100042784	ENSMUSG00000075028	0.902
diana_microt	MIMAT0000526	mmu-miR-15a-5p	6430571L13Rik	235599	ENSMUSG00000037977	0.901
diana_microt	MIMAT0000526	mmu-miR-15a-5p	Gm8257		ENSMUSG00000079265	0.901
diana_microt	MIMAT0000526	mmu-miR-15a-5p	Mapk8	26419	ENSMUSG00000021936	0.901
diana_microt	MIMAT0000526	mmu-miR-15a-5p	Tmem104	320534	ENSMUSG00000045980	0.9
diana_microt	MIMAT0000526	mmu-miR-15a-5p	Ippk	75678	ENSMUSG00000021385	0.9
diana_microt	MIMAT0000526	mmu-miR-15a-5p	Atp4a	11944	ENSMUSG00000005553	0.9
diana_microt	MIMAT0000526	mmu-miR-15a-5p	Fchsd2	207278	ENSMUSG00000030691	0.9
diana_microt	MIMAT0000526	mmu-miR-15a-5p	Cbx4	12418	ENSMUSG00000039989	0.897
diana_microt	MIMAT0000526	mmu-miR-15a-5p	Csf1	12977	ENSMUSG00000014599	0.895
diana_microt	MIMAT0000526	mmu-miR-15a-5p	Akap11	219181	ENSMUSG00000022016	0.895
diana_microt	MIMAT0000526	mmu-miR-15a-5p	5031410I06Rik	100862349	ENSMUSG00000051940	0.894
diana_microt	MIMAT0000526	mmu-miR-15a-5p	Tsr1	104662	ENSMUSG00000038335	0.894
diana_microt	MIMAT0000526	mmu-miR-15a-5p	Fosl1	14283	ENSMUSG00000024912	0.894
diana_microt	MIMAT0000526	mmu-miR-15a-5p	5031410I06Rik	381622	ENSMUSG00000051940	0.894
diana_microt	MIMAT0000526	mmu-miR-15a-5p	Zbtb41	226470	ENSMUSG00000033964	0.894
diana_microt	MIMAT0000526	mmu-miR-15a-5p	5031410I06Rik	100862388	ENSMUSG00000051940	0.894
diana_microt	MIMAT0000526	mmu-miR-15a-5p	1700049E17Rik1		ENSMUSG00000079271	0.894
diana_microt	MIMAT0000526	mmu-miR-15a-5p	Otud4	73945	ENSMUSG00000036990	0.892
diana_microt	MIMAT0000526	mmu-miR-15a-5p	Slc12a6	107723	ENSMUSG00000027130	0.892
diana_microt	MIMAT0000526	mmu-miR-15a-5p	Fam133b	68152	ENSMUSG00000058503	0.891
diana_microt	MIMAT0000526	mmu-miR-15a-5p	Gm8267	666744	ENSMUSG00000091923	0.891
diana_microt	MIMAT0000526	mmu-miR-15a-5p	Tll1	21892	ENSMUSG00000053626	0.891
diana_microt	MIMAT0000526	mmu-miR-15a-5p	Spryd3	223918	ENSMUSG00000036966	0.891
diana_microt	MIMAT0000526	mmu-miR-15a-5p	Ddx3y	26900	ENSMUSG00000069045	0.89
diana_microt	MIMAT0000526	mmu-miR-15a-5p	Tmem167	66074	ENSMUSG00000012422	0.888
diana_microt	MIMAT0000526	mmu-miR-15a-5p	Zdhhc24	70605	ENSMUSG00000006463	0.888
diana_microt	MIMAT0000526	mmu-miR-15a-5p	Scn8a	20273	ENSMUSG00000023033	0.887
diana_microt	MIMAT0000526	mmu-miR-15a-5p	Ret	19713	ENSMUSG00000030110	0.887
diana_microt	MIMAT0000526	mmu-miR-15a-5p	Kcnq5	226922	ENSMUSG00000028033	0.886
diana_microt	MIMAT0000526	mmu-miR-15a-5p	Zfp423	94187	ENSMUSG00000045333	0.886
diana_microt	MIMAT0000526	mmu-miR-15a-5p	Atoh1	11921	ENSMUSG00000073043	0.886
diana_microt	MIMAT0000526	mmu-miR-15a-5p	Mex3c	240396	ENSMUSG00000037253	0.885
diana_microt	MIMAT0000526	mmu-miR-15a-5p	Coq6	217707	ENSMUSG00000021235	0.885
diana_microt	MIMAT0000526	mmu-miR-15a-5p	Sec24a	77371	ENSMUSG00000036391	0.884
diana_microt	MIMAT0000526	mmu-miR-15a-5p	Pwwp2b	101631	ENSMUSG00000060260	0.883
diana_microt	MIMAT0000526	mmu-miR-15a-5p	Seh1l	72124	ENSMUSG00000079614	0.883
diana_microt	MIMAT0000526	mmu-miR-15a-5p	D15Ertd621e	210998	ENSMUSG00000037119	0.883
diana_microt	MIMAT0000526	mmu-miR-15a-5p	Usp42	76800	ENSMUSG00000051306	0.882
diana_microt	MIMAT0000526	mmu-miR-15a-5p	Fam160b2	239170	ENSMUSG00000022095	0.881
diana_microt	MIMAT0000526	mmu-miR-15a-5p	Pam	18484	ENSMUSG00000026335	0.881
diana_microt	MIMAT0000526	mmu-miR-15a-5p	Trim35	66854	ENSMUSG00000022043	0.881
diana_microt	MIMAT0000526	mmu-miR-15a-5p	Knop1	66356	ENSMUSG00000030980	0.881
diana_microt	MIMAT0000526	mmu-miR-15a-5p	Dll4	54485	ENSMUSG00000027314	0.881
diana_microt	MIMAT0000526	mmu-miR-15a-5p	Cdca4	71963	ENSMUSG00000047832	0.879
diana_microt	MIMAT0000526	mmu-miR-15a-5p	Tsc22d2	72033	ENSMUSG00000027806	0.879
diana_microt	MIMAT0000526	mmu-miR-15a-5p	Rad9a	19367	ENSMUSG00000024824	0.879
diana_microt	MIMAT0000526	mmu-miR-15a-5p	Slc4a4	54403	ENSMUSG00000060961	0.878
diana_microt	MIMAT0000526	mmu-miR-15a-5p	Rad51	19361	ENSMUSG00000027323	0.877
diana_microt	MIMAT0000526	mmu-miR-15a-5p	Sms	671878	ENSMUSG00000071708	0.877
diana_microt	MIMAT0000526	mmu-miR-15a-5p	Erlin2	244373	ENSMUSG00000031483	0.877
diana_microt	MIMAT0000526	mmu-miR-15a-5p	Kdsr	70750	ENSMUSG00000009905	0.877
diana_microt	MIMAT0000526	mmu-miR-15a-5p	Nxph1	18231	ENSMUSG00000046178	0.877
diana_microt	MIMAT0000526	mmu-miR-15a-5p	Sms	20603	ENSMUSG00000071708	0.877
diana_microt	MIMAT0000526	mmu-miR-15a-5p	Pdap1	231887	ENSMUSG00000029623	0.876
diana_microt	MIMAT0000526	mmu-miR-15a-5p	Hectd1	207304	ENSMUSG00000035247	0.876
diana_microt	MIMAT0000526	mmu-miR-15a-5p	Trdmt1	13434	ENSMUSG00000026723	0.876
diana_microt	MIMAT0000526	mmu-miR-15a-5p	Gm1979	100862368	ENSMUSG00000091049	0.872
diana_microt	MIMAT0000526	mmu-miR-15a-5p	Degs2	70059	ENSMUSG00000021263	0.872
diana_microt	MIMAT0000526	mmu-miR-15a-5p	Gm1979	100039045	ENSMUSG00000091049	0.872
diana_microt	MIMAT0000526	mmu-miR-15a-5p	Ppp6c	67857	ENSMUSG00000026753	0.872
diana_microt	MIMAT0000526	mmu-miR-15a-5p	Nptxr	504193	ENSMUSG00000022421	0.872
diana_microt	MIMAT0000526	mmu-miR-15a-5p	Gm1979	100038949	ENSMUSG00000091049	0.872
diana_microt	MIMAT0000526	mmu-miR-15a-5p	Nptxr	73340	ENSMUSG00000022421	0.872
diana_microt	MIMAT0000526	mmu-miR-15a-5p	Gm7347	664804	ENSMUSG00000073117	0.871
diana_microt	MIMAT0000526	mmu-miR-15a-5p	Rad23b	19359	ENSMUSG00000028426	0.871
diana_microt	MIMAT0000526	mmu-miR-15a-5p	Gm5577		ENSMUSG00000084950	0.87
diana_microt	MIMAT0000526	mmu-miR-15a-5p	Mark2	13728	ENSMUSG00000024969	0.87
diana_microt	MIMAT0000526	mmu-miR-15a-5p	Slc13a3	114644	ENSMUSG00000018459	0.87
diana_microt	MIMAT0000526	mmu-miR-15a-5p	Slc9a6	236794	ENSMUSG00000060681	0.869
diana_microt	MIMAT0000526	mmu-miR-15a-5p	Clcn5	12728	ENSMUSG00000004317	0.867
diana_microt	MIMAT0000526	mmu-miR-15a-5p	Caprin1	53872	ENSMUSG00000027184	0.867
diana_microt	MIMAT0000526	mmu-miR-15a-5p	Vstm2a	211739	ENSMUSG00000048834	0.867
diana_microt	MIMAT0000526	mmu-miR-15a-5p	Ppfia3	76787	ENSMUSG00000003863	0.867
diana_microt	MIMAT0000526	mmu-miR-15a-5p	Med28	66999	ENSMUSG00000015804	0.867
diana_microt	MIMAT0000526	mmu-miR-15a-5p	Ankrd13b	268445	ENSMUSG00000037907	0.867
diana_microt	MIMAT0000526	mmu-miR-15a-5p	Phlda3	27280	ENSMUSG00000041801	0.867
diana_microt	MIMAT0000526	mmu-miR-15a-5p	Slc24a3	94249	ENSMUSG00000063873	0.866
diana_microt	MIMAT0000526	mmu-miR-15a-5p	Rictor	78757	ENSMUSG00000050310	0.866
diana_microt	MIMAT0000526	mmu-miR-15a-5p	Cask	12361	ENSMUSG00000031012	0.866
diana_microt	MIMAT0000526	mmu-miR-15a-5p	Gm10220	434689	ENSMUSG00000067698	0.865
diana_microt	MIMAT0000526	mmu-miR-15a-5p	Atrip	235610	ENSMUSG00000025646	0.865
diana_microt	MIMAT0000526	mmu-miR-15a-5p	Nup210	54563	ENSMUSG00000030091	0.865
diana_microt	MIMAT0000526	mmu-miR-15a-5p	Kif1c	16562	ENSMUSG00000020821	0.865
diana_microt	MIMAT0000526	mmu-miR-15a-5p	Ulbp1	77777	ENSMUSG00000079685	0.864
diana_microt	MIMAT0000526	mmu-miR-15a-5p	Efcab4a	213573	ENSMUSG00000048200	0.864
diana_microt	MIMAT0000526	mmu-miR-15a-5p	Phc3	241915	ENSMUSG00000037652	0.864
diana_microt	MIMAT0000526	mmu-miR-15a-5p	Fbxo33	70611	ENSMUSG00000035329	0.862
diana_microt	MIMAT0000526	mmu-miR-15a-5p	Shoc2	56392	ENSMUSG00000024976	0.862
diana_microt	MIMAT0000526	mmu-miR-15a-5p	Gm17484		ENSMUSG00000091514	0.86
diana_microt	MIMAT0000526	mmu-miR-15a-5p	Zfhx3	11906	ENSMUSG00000038872	0.86
diana_microt	MIMAT0000526	mmu-miR-15a-5p	Kpna3	16648	ENSMUSG00000021929	0.859
diana_microt	MIMAT0000526	mmu-miR-15a-5p	Slc12a2	20496	ENSMUSG00000024597	0.859
diana_microt	MIMAT0000526	mmu-miR-15a-5p	Cdk12	69131	ENSMUSG00000003119	0.859
diana_microt	MIMAT0000526	mmu-miR-15a-5p	Slc6a20b	22599	ENSMUSG00000025243	0.859
diana_microt	MIMAT0000526	mmu-miR-15a-5p	Prr11	270906	ENSMUSG00000020493	0.859
diana_microt	MIMAT0000526	mmu-miR-15a-5p	Calcr	12311	ENSMUSG00000023964	0.859
diana_microt	MIMAT0000526	mmu-miR-15a-5p	Tmem39b	230770	ENSMUSG00000053730	0.859
diana_microt	MIMAT0000526	mmu-miR-15a-5p	Kctd8	243043	ENSMUSG00000037653	0.858
diana_microt	MIMAT0000526	mmu-miR-15a-5p	Homer1	26556	ENSMUSG00000007617	0.858
diana_microt	MIMAT0000526	mmu-miR-15a-5p	Slc23a1	20522	ENSMUSG00000024354	0.858
diana_microt	MIMAT0000526	mmu-miR-15a-5p	Amer1	72345	ENSMUSG00000050332	0.858
diana_microt	MIMAT0000526	mmu-miR-15a-5p	Fam135a	68187	ENSMUSG00000026153	0.858
diana_microt	MIMAT0000526	mmu-miR-15a-5p	Krtap11-1	16693	ENSMUSG00000091212	0.857
diana_microt	MIMAT0000526	mmu-miR-15a-5p	Ell2	192657	ENSMUSG00000001542	0.857
diana_microt	MIMAT0000526	mmu-miR-15a-5p	Tusc3	80286	ENSMUSG00000039530	0.856
diana_microt	MIMAT0000526	mmu-miR-15a-5p	Cobll1	319876	ENSMUSG00000034903	0.855
diana_microt	MIMAT0000526	mmu-miR-15a-5p	Ppp2r1b	73699	ENSMUSG00000032058	0.855
diana_microt	MIMAT0000526	mmu-miR-15a-5p	Kif1b	16561	ENSMUSG00000063077	0.855
diana_microt	MIMAT0000526	mmu-miR-15a-5p	Lingo4	320747	ENSMUSG00000044505	0.854
diana_microt	MIMAT0000526	mmu-miR-15a-5p	Armcx6	278097	ENSMUSG00000050394	0.854
diana_microt	MIMAT0000526	mmu-miR-15a-5p	Gcat	26912	ENSMUSG00000006378	0.853
diana_microt	MIMAT0000526	mmu-miR-15a-5p	Gcat	14429	ENSMUSG00000006378	0.853
diana_microt	MIMAT0000526	mmu-miR-15a-5p	Phf15	76901	ENSMUSG00000020387	0.853
diana_microt	MIMAT0000526	mmu-miR-15a-5p	Klhl2	77113	ENSMUSG00000031605	0.852
diana_microt	MIMAT0000526	mmu-miR-15a-5p	Ppap2b	67916	ENSMUSG00000028517	0.852
diana_microt	MIMAT0000526	mmu-miR-15a-5p	Rnf125	67664	ENSMUSG00000033107	0.852
diana_microt	MIMAT0000526	mmu-miR-15a-5p	Esrrg	26381	ENSMUSG00000026610	0.851
diana_microt	MIMAT0000526	mmu-miR-15a-5p	Sos2	20663	ENSMUSG00000034801	0.851
diana_microt	MIMAT0000526	mmu-miR-15a-5p	Nop56	67134	ENSMUSG00000027405	0.85
diana_microt	MIMAT0000526	mmu-miR-15a-5p	Shisa3	330096	ENSMUSG00000050010	0.85
diana_microt	MIMAT0000526	mmu-miR-15a-5p	Mipol1	73490	ENSMUSG00000047022	0.849
diana_microt	MIMAT0000526	mmu-miR-15a-5p	Fmn2	54418	ENSMUSG00000028354	0.849
diana_microt	MIMAT0000526	mmu-miR-15a-5p	Ppig	228005	ENSMUSG00000042133	0.849
diana_microt	MIMAT0000526	mmu-miR-15a-5p	Bace1	23821	ENSMUSG00000032086	0.849
diana_microt	MIMAT0000526	mmu-miR-15a-5p	Tfap2d	226896	ENSMUSG00000042596	0.848
diana_microt	MIMAT0000526	mmu-miR-15a-5p	Wdtc1	230796	ENSMUSG00000037622	0.848
diana_microt	MIMAT0000526	mmu-miR-15a-5p	Sox5	20678	ENSMUSG00000041540	0.848
diana_microt	MIMAT0000526	mmu-miR-15a-5p	2810006K23Rik	72650	ENSMUSG00000047635	0.848
diana_microt	MIMAT0000526	mmu-miR-15a-5p	Hiatl1	66631	ENSMUSG00000038212	0.848
diana_microt	MIMAT0000526	mmu-miR-15a-5p	Hdgf	15191	ENSMUSG00000004897	0.847
diana_microt	MIMAT0000526	mmu-miR-15a-5p	Pcdh19	279653	ENSMUSG00000051323	0.846
diana_microt	MIMAT0000526	mmu-miR-15a-5p	Trim68	101700	ENSMUSG00000073968	0.845
diana_microt	MIMAT0000526	mmu-miR-15a-5p	Slc4a7	218756	ENSMUSG00000021733	0.844
diana_microt	MIMAT0000526	mmu-miR-15a-5p	Gm8126		ENSMUSG00000090634	0.844
diana_microt	MIMAT0000526	mmu-miR-15a-5p	Gm10471		ENSMUSG00000073116	0.844
diana_microt	MIMAT0000526	mmu-miR-15a-5p	Dennd4b	229541	ENSMUSG00000042404	0.843
diana_microt	MIMAT0000526	mmu-miR-15a-5p	A830018L16Rik		ENSMUSG00000095719	0.843
diana_microt	MIMAT0000526	mmu-miR-15a-5p	Plekhh1	211945	ENSMUSG00000060716	0.843
diana_microt	MIMAT0000526	mmu-miR-15a-5p	Myo5b	17919	ENSMUSG00000025885	0.842
diana_microt	MIMAT0000526	mmu-miR-15a-5p	Gigyf1	57330	ENSMUSG00000029714	0.842
diana_microt	MIMAT0000526	mmu-miR-15a-5p	Kpna1	16646	ENSMUSG00000022905	0.842
diana_microt	MIMAT0000526	mmu-miR-15a-5p	D2hgdh	98314	ENSMUSG00000073609	0.842
diana_microt	MIMAT0000526	mmu-miR-15a-5p	BC024978	414069	ENSMUSG00000078786	0.842
diana_microt	MIMAT0000526	mmu-miR-15a-5p	Mtch2	56428	ENSMUSG00000027282	0.841
diana_microt	MIMAT0000526	mmu-miR-15a-5p	Abl2	11352	ENSMUSG00000026596	0.841
diana_microt	MIMAT0000526	mmu-miR-15a-5p	Brd4	57261	ENSMUSG00000024002	0.841
diana_microt	MIMAT0000526	mmu-miR-15a-5p	A830010M20Rik	231570	ENSMUSG00000044060	0.84
diana_microt	MIMAT0000526	mmu-miR-15a-5p	Usp7	252870	ENSMUSG00000022710	0.84
diana_microt	MIMAT0000526	mmu-miR-15a-5p	Gm996	381353	ENSMUSG00000029419	0.839
diana_microt	MIMAT0000526	mmu-miR-15a-5p	Ube2q1	70093	ENSMUSG00000042572	0.839
diana_microt	MIMAT0000526	mmu-miR-15a-5p	Gm8011		ENSMUSG00000094954	0.839
diana_microt	MIMAT0000526	mmu-miR-15a-5p	Lrp5	16973	ENSMUSG00000024913	0.839
diana_microt	MIMAT0000526	mmu-miR-15a-5p	Mtcp1	17763	ENSMUSG00000090110	0.838
diana_microt	MIMAT0000526	mmu-miR-15a-5p	Aatk	11302	ENSMUSG00000025375	0.838
diana_microt	MIMAT0000526	mmu-miR-15a-5p	Csde1	229663	ENSMUSG00000068823	0.836
diana_microt	MIMAT0000526	mmu-miR-15a-5p	Lhx1	16869	ENSMUSG00000018698	0.836
diana_microt	MIMAT0000526	mmu-miR-15a-5p	Tacc1	320165	ENSMUSG00000065954	0.836
diana_microt	MIMAT0000526	mmu-miR-15a-5p	Slc39a10	227059	ENSMUSG00000025986	0.835
diana_microt	MIMAT0000526	mmu-miR-15a-5p	Btg2	12227	ENSMUSG00000020423	0.835
diana_microt	MIMAT0000526	mmu-miR-15a-5p	Serbp1	66870	ENSMUSG00000036371	0.835
diana_microt	MIMAT0000526	mmu-miR-15a-5p	Gbp2b	14468	ENSMUSG00000028269	0.834
diana_microt	MIMAT0000526	mmu-miR-15a-5p	Fkrp	243853	ENSMUSG00000048920	0.834
diana_microt	MIMAT0000526	mmu-miR-15a-5p	Atp13a3	224088	ENSMUSG00000022533	0.834
diana_microt	MIMAT0000526	mmu-miR-15a-5p	Kif5a	16572	ENSMUSG00000074657	0.833
diana_microt	MIMAT0000526	mmu-miR-15a-5p	Stxbp6	217517	ENSMUSG00000046314	0.833
diana_microt	MIMAT0000526	mmu-miR-15a-5p	Akap17b	338351	ENSMUSG00000059708	0.832
diana_microt	MIMAT0000526	mmu-miR-15a-5p	Syt3	20981	ENSMUSG00000030731	0.831
diana_microt	MIMAT0000526	mmu-miR-15a-5p	Slc41a2	338365	ENSMUSG00000034591	0.831
diana_microt	MIMAT0000526	mmu-miR-15a-5p	Abhd16a	193742	ENSMUSG00000007036	0.83
diana_microt	MIMAT0000526	mmu-miR-15a-5p	Stk38l	232533	ENSMUSG00000001630	0.83
diana_microt	MIMAT0000526	mmu-miR-15a-5p	Esrra	26379	ENSMUSG00000024955	0.829
diana_microt	MIMAT0000526	mmu-miR-15a-5p	Desi1	28075	ENSMUSG00000022472	0.829
diana_microt	MIMAT0000526	mmu-miR-15a-5p	Eda	13607	ENSMUSG00000059327	0.829
diana_microt	MIMAT0000526	mmu-miR-15a-5p	Ppih	433064	ENSMUSG00000060288	0.829
diana_microt	MIMAT0000526	mmu-miR-15a-5p	1810013L24Rik	69053	ENSMUSG00000022507	0.829
diana_microt	MIMAT0000526	mmu-miR-15a-5p	Ppih	66101	ENSMUSG00000060288	0.829
diana_microt	MIMAT0000526	mmu-miR-15a-5p	Wapal	218914	ENSMUSG00000041408	0.828
diana_microt	MIMAT0000526	mmu-miR-15a-5p	Lhx3	16871	ENSMUSG00000026934	0.827
diana_microt	MIMAT0000526	mmu-miR-15a-5p	Rnf217	268291	ENSMUSG00000063760	0.827
diana_microt	MIMAT0000526	mmu-miR-15a-5p	Macf1	11426	ENSMUSG00000028649	0.827
diana_microt	MIMAT0000526	mmu-miR-15a-5p	Amotl1	75723	ENSMUSG00000013076	0.827
diana_microt	MIMAT0000526	mmu-miR-15a-5p	Il1rapl1	331461	ENSMUSG00000052372	0.827
diana_microt	MIMAT0000526	mmu-miR-15a-5p	Crem	12916	ENSMUSG00000063889	0.826
diana_microt	MIMAT0000526	mmu-miR-15a-5p	Smad5	17129	ENSMUSG00000021540	0.826
diana_microt	MIMAT0000526	mmu-miR-15a-5p	Pak7	241656	ENSMUSG00000039913	0.826
diana_microt	MIMAT0000526	mmu-miR-15a-5p	Gcnt3	72077	ENSMUSG00000032226	0.826
diana_microt	MIMAT0000526	mmu-miR-15a-5p	Cldn2	12738	ENSMUSG00000047230	0.825
diana_microt	MIMAT0000526	mmu-miR-15a-5p	Fam171a2	217219	ENSMUSG00000034685	0.825
diana_microt	MIMAT0000526	mmu-miR-15a-5p	Cxcl10	15945	ENSMUSG00000034855	0.824
diana_microt	MIMAT0000526	mmu-miR-15a-5p	Siah1a	20437	ENSMUSG00000036840	0.824
diana_microt	MIMAT0000526	mmu-miR-15a-5p	Pofut1	140484	ENSMUSG00000046020	0.823
diana_microt	MIMAT0000526	mmu-miR-15a-5p	Sall4	99377	ENSMUSG00000027547	0.823
diana_microt	MIMAT0000526	mmu-miR-15a-5p	1700021K19Rik	100502698	ENSMUSG00000035629	0.822
diana_microt	MIMAT0000526	mmu-miR-15a-5p	Slc25a37	67712	ENSMUSG00000034248	0.822
diana_microt	MIMAT0000526	mmu-miR-15a-5p	Sptlc1	268656	ENSMUSG00000021468	0.821
diana_microt	MIMAT0000526	mmu-miR-15a-5p	Carm1	59035	ENSMUSG00000032185	0.821
diana_microt	MIMAT0000526	mmu-miR-15a-5p	Acox1	11430	ENSMUSG00000020777	0.821
diana_microt	MIMAT0000526	mmu-miR-15a-5p	Rgp1	242406	ENSMUSG00000028468	0.82
diana_microt	MIMAT0000526	mmu-miR-15a-5p	Dnaja2	56445	ENSMUSG00000031701	0.819
diana_microt	MIMAT0000526	mmu-miR-15a-5p	Runx1t1	12395	ENSMUSG00000006586	0.819
diana_microt	MIMAT0000526	mmu-miR-15a-5p	Fam134a	227298	ENSMUSG00000049339	0.819
diana_microt	MIMAT0000526	mmu-miR-15a-5p	Mms19	72199	ENSMUSG00000025159	0.819
diana_microt	MIMAT0000526	mmu-miR-15a-5p	Nacc2	67991	ENSMUSG00000026932	0.819
diana_microt	MIMAT0000526	mmu-miR-15a-5p	Stx1a	20907	ENSMUSG00000007207	0.819
diana_microt	MIMAT0000526	mmu-miR-15a-5p	Myadm	50918	ENSMUSG00000068566	0.818
diana_microt	MIMAT0000526	mmu-miR-15a-5p	Sidt2	214597	ENSMUSG00000034908	0.817
diana_microt	MIMAT0000526	mmu-miR-15a-5p	Fam60a	56306	ENSMUSG00000039985	0.816
diana_microt	MIMAT0000526	mmu-miR-15a-5p	Plxna2	18845	ENSMUSG00000026640	0.816
diana_microt	MIMAT0000526	mmu-miR-15a-5p	Wwp1	107568	ENSMUSG00000041058	0.815
diana_microt	MIMAT0000526	mmu-miR-15a-5p	Rasl10b	276952	ENSMUSG00000020684	0.815
diana_microt	MIMAT0000526	mmu-miR-15a-5p	Pnp2	667034	ENSMUSG00000068417	0.815
diana_microt	MIMAT0000526	mmu-miR-15a-5p	Hmga1	15361	ENSMUSG00000046711	0.814
diana_microt	MIMAT0000526	mmu-miR-15a-5p	Gm10564	101055946	ENSMUSG00000073686	0.814
diana_microt	MIMAT0000526	mmu-miR-15a-5p	Hmga1	111241	ENSMUSG00000046711	0.814
diana_microt	MIMAT0000526	mmu-miR-15a-5p	Ago2	239528	ENSMUSG00000036698	0.813
diana_microt	MIMAT0000526	mmu-miR-15a-5p	Fktn	246179	ENSMUSG00000028414	0.813
diana_microt	MIMAT0000526	mmu-miR-15a-5p	Ago4	76850	ENSMUSG00000042500	0.813
diana_microt	MIMAT0000526	mmu-miR-15a-5p	Tmtc4	70551	ENSMUSG00000041594	0.813
diana_microt	MIMAT0000526	mmu-miR-15a-5p	Ankib1	70797	ENSMUSG00000040351	0.812
diana_microt	MIMAT0000526	mmu-miR-15a-5p	Svip	75744	ENSMUSG00000074093	0.811
diana_microt	MIMAT0000526	mmu-miR-15a-5p	Mfsd4	213006	ENSMUSG00000059149	0.811
diana_microt	MIMAT0000526	mmu-miR-15a-5p	Tmem135	72759	ENSMUSG00000039428	0.81
diana_microt	MIMAT0000526	mmu-miR-15a-5p	B3galt1	26877	ENSMUSG00000034780	0.809
diana_microt	MIMAT0000526	mmu-miR-15a-5p	Cluh	74148	ENSMUSG00000020741	0.809
diana_microt	MIMAT0000526	mmu-miR-15a-5p	Prrx1	18933	ENSMUSG00000026586	0.809
diana_microt	MIMAT0000526	mmu-miR-15a-5p	Usp19	71472	ENSMUSG00000006676	0.809
diana_microt	MIMAT0000526	mmu-miR-15a-5p	Kcnc4	99738	ENSMUSG00000027895	0.809
diana_microt	MIMAT0000526	mmu-miR-15a-5p	Tppp3	67971	ENSMUSG00000014846	0.808
diana_microt	MIMAT0000526	mmu-miR-15a-5p	Camta2	216874	ENSMUSG00000040712	0.808
diana_microt	MIMAT0000526	mmu-miR-15a-5p	Dync1i1	13426	ENSMUSG00000029757	0.808
diana_microt	MIMAT0000526	mmu-miR-15a-5p	Il4i1	14204	ENSMUSG00000074141	0.807
diana_microt	MIMAT0000526	mmu-miR-15a-5p	Wasl	73178	ENSMUSG00000029684	0.807
diana_microt	MIMAT0000526	mmu-miR-15a-5p	Camsap1	227634	ENSMUSG00000026933	0.807
diana_microt	MIMAT0000526	mmu-miR-15a-5p	Il4i1	100328588	ENSMUSG00000074141	0.807
diana_microt	MIMAT0000526	mmu-miR-15a-5p	Gnl3l	237107	ENSMUSG00000025266	0.807
diana_microt	MIMAT0000526	mmu-miR-15a-5p	Extl3	54616	ENSMUSG00000021978	0.806
diana_microt	MIMAT0000526	mmu-miR-15a-5p	Cnksr2	245684	ENSMUSG00000025658	0.806
diana_microt	MIMAT0000526	mmu-miR-15a-5p	Csrnp1	215418	ENSMUSG00000032515	0.806
diana_microt	MIMAT0000526	mmu-miR-15a-5p	Snx27	76742	ENSMUSG00000028136	0.806
diana_microt	MIMAT0000526	mmu-miR-15a-5p	Otx1	18423	ENSMUSG00000005917	0.806
diana_microt	MIMAT0000526	mmu-miR-15a-5p	Metap1	75624	ENSMUSG00000005813	0.806
diana_microt	MIMAT0000526	mmu-miR-15a-5p	Xpo7	65246	ENSMUSG00000022100	0.806
diana_microt	MIMAT0000526	mmu-miR-15a-5p	Syne2	319565	ENSMUSG00000063450	0.806
diana_microt	MIMAT0000526	mmu-miR-15a-5p	Lrp2	14725	ENSMUSG00000027070	0.805
diana_microt	MIMAT0000526	mmu-miR-15a-5p	Bicd2	76895	ENSMUSG00000037933	0.805
diana_microt	MIMAT0000526	mmu-miR-15a-5p	Mll1	214162	ENSMUSG00000002028	0.804
diana_microt	MIMAT0000526	mmu-miR-15a-5p	Usp14	59025	ENSMUSG00000047879	0.804
diana_microt	MIMAT0000526	mmu-miR-15a-5p	Ppap2a	19012	ENSMUSG00000021759	0.804
diana_microt	MIMAT0000526	mmu-miR-15a-5p	Pisd	320951	ENSMUSG00000023452	0.804
diana_microt	MIMAT0000526	mmu-miR-15a-5p	Gm4981	245263	ENSMUSG00000075045	0.803
diana_microt	MIMAT0000526	mmu-miR-15a-5p	Hipk3	15259	ENSMUSG00000027177	0.803
diana_microt	MIMAT0000526	mmu-miR-15a-5p	App	11820	ENSMUSG00000022892	0.803
diana_microt	MIMAT0000526	mmu-miR-15a-5p	Iars	105148	ENSMUSG00000037851	0.802
diana_microt	MIMAT0000526	mmu-miR-15a-5p	Rab4b	19342	ENSMUSG00000053291	0.802
diana_microt	MIMAT0000526	mmu-miR-15a-5p	Col24a1	71355	ENSMUSG00000028197	0.8
diana_microt	MIMAT0000526	mmu-miR-15a-5p	Tmc7	209760	ENSMUSG00000042246	0.8
diana_microt	MIMAT0000526	mmu-miR-15a-5p	Kalrn	545156	ENSMUSG00000061751	0.8
diana_microt	MIMAT0000526	mmu-miR-15a-5p	Arfip2	76932	ENSMUSG00000030881	0.8
diana_microt	MIMAT0000526	mmu-miR-15a-5p	Clasrp	53609	ENSMUSG00000061028	0.8
diana_microt	MIMAT0000526	mmu-miR-15a-5p	Madd	228355	ENSMUSG00000040687	0.799
diana_microt	MIMAT0000526	mmu-miR-15a-5p	Nlrp10	244202	ENSMUSG00000049709	0.799
diana_microt	MIMAT0000526	mmu-miR-15a-5p	Pappa2	23850	ENSMUSG00000073530	0.799
diana_microt	MIMAT0000526	mmu-miR-15a-5p	Lrig2	269473	ENSMUSG00000032913	0.799
diana_microt	MIMAT0000526	mmu-miR-15a-5p	Ttc12	235330	ENSMUSG00000040219	0.799
diana_microt	MIMAT0000526	mmu-miR-15a-5p	Rptor	74370	ENSMUSG00000025583	0.799
diana_microt	MIMAT0000526	mmu-miR-15a-5p	Sema5b	20357	ENSMUSG00000052133	0.799
diana_microt	MIMAT0000526	mmu-miR-15a-5p	Ipo4	75751	ENSMUSG00000002319	0.798
diana_microt	MIMAT0000526	mmu-miR-15a-5p	Cacna1i	239556	ENSMUSG00000022416	0.798
diana_microt	MIMAT0000526	mmu-miR-15a-5p	Zcchc18	66995	ENSMUSG00000031428	0.798
diana_microt	MIMAT0000526	mmu-miR-15a-5p	Rnf8	58230	ENSMUSG00000090083	0.797
diana_microt	MIMAT0000526	mmu-miR-15a-5p	Arl3	56350	ENSMUSG00000025035	0.797
diana_microt	MIMAT0000526	mmu-miR-15a-5p	Gsk3b	56637	ENSMUSG00000022812	0.796
diana_microt	MIMAT0000526	mmu-miR-15a-5p	Ephb2	13844	ENSMUSG00000028664	0.796
diana_microt	MIMAT0000526	mmu-miR-15a-5p	Zbtb20	56490	ENSMUSG00000022708	0.796
diana_microt	MIMAT0000526	mmu-miR-15a-5p	Rab3c	67295	ENSMUSG00000021700	0.795
diana_microt	MIMAT0000526	mmu-miR-15a-5p	C1ql3	227580	ENSMUSG00000049630	0.795
diana_microt	MIMAT0000526	mmu-miR-15a-5p	Hspa4l	18415	ENSMUSG00000025757	0.795
diana_microt	MIMAT0000526	mmu-miR-15a-5p	Cdk8	264064	ENSMUSG00000029635	0.795
diana_microt	MIMAT0000526	mmu-miR-15a-5p	Nrbp1	192292	ENSMUSG00000029148	0.795
diana_microt	MIMAT0000526	mmu-miR-15a-5p	Chpf	74241	ENSMUSG00000032997	0.794
diana_microt	MIMAT0000526	mmu-miR-15a-5p	Gpr174	213439	ENSMUSG00000073008	0.794
diana_microt	MIMAT0000526	mmu-miR-15a-5p	Tasp1	75812	ENSMUSG00000039033	0.794
diana_microt	MIMAT0000526	mmu-miR-15a-5p	Bdnf	12064	ENSMUSG00000048482	0.794
diana_microt	MIMAT0000526	mmu-miR-15a-5p	Vti1b	53612	ENSMUSG00000021124	0.793
diana_microt	MIMAT0000526	mmu-miR-15a-5p	Zc3h6	78751	ENSMUSG00000042851	0.793
diana_microt	MIMAT0000526	mmu-miR-15a-5p	Rap2c	72065	ENSMUSG00000050029	0.793
diana_microt	MIMAT0000526	mmu-miR-15a-5p	Ankrd17	81702	ENSMUSG00000055204	0.793
diana_microt	MIMAT0000526	mmu-miR-15a-5p	Ept1		ENSMUSG00000075703	0.793
diana_microt	MIMAT0000526	mmu-miR-15a-5p	Rcor3	214742	ENSMUSG00000037395	0.793
diana_microt	MIMAT0000526	mmu-miR-15a-5p	Hmbox1	219150	ENSMUSG00000021972	0.792
diana_microt	MIMAT0000526	mmu-miR-15a-5p	Atp7a	11977	ENSMUSG00000033792	0.791
diana_microt	MIMAT0000526	mmu-miR-15a-5p	Vezt	215008	ENSMUSG00000036099	0.791
diana_microt	MIMAT0000526	mmu-miR-15a-5p	Isoc1	66307	ENSMUSG00000024601	0.79
diana_microt	MIMAT0000526	mmu-miR-15a-5p	Serpini1	20713	ENSMUSG00000027834	0.79
diana_microt	MIMAT0000526	mmu-miR-15a-5p	Pcid2	234069	ENSMUSG00000038542	0.79
diana_microt	MIMAT0000526	mmu-miR-15a-5p	Baz2a	116848	ENSMUSG00000040054	0.789
diana_microt	MIMAT0000526	mmu-miR-15a-5p	Hspg2	15530	ENSMUSG00000028763	0.789
diana_microt	MIMAT0000526	mmu-miR-15a-5p	Gabbr1	54393	ENSMUSG00000024462	0.789
diana_microt	MIMAT0000526	mmu-miR-15a-5p	Ifnk	387510	ENSMUSG00000042993	0.789
diana_microt	MIMAT0000526	mmu-miR-15a-5p	Tfpi	21788	ENSMUSG00000027082	0.788
diana_microt	MIMAT0000526	mmu-miR-15a-5p	Crebl2	232430	ENSMUSG00000032652	0.788
diana_microt	MIMAT0000526	mmu-miR-15a-5p	Cdc6	23834	ENSMUSG00000017499	0.788
diana_microt	MIMAT0000526	mmu-miR-15a-5p	Nat8l	269642	ENSMUSG00000048142	0.788
diana_microt	MIMAT0000526	mmu-miR-15a-5p	Exoc8	102058	ENSMUSG00000074030	0.788
diana_microt	MIMAT0000526	mmu-miR-15a-5p	Smarca1	93761	ENSMUSG00000031099	0.788
diana_microt	MIMAT0000526	mmu-miR-15a-5p	Kcna1	16485	ENSMUSG00000047976	0.787
diana_microt	MIMAT0000526	mmu-miR-15a-5p	Fntb	639541	ENSMUSG00000033373	0.787
diana_microt	MIMAT0000526	mmu-miR-15a-5p	Slc17a3	105355	ENSMUSG00000036083	0.787
diana_microt	MIMAT0000526	mmu-miR-15a-5p	Gnai3	14679	ENSMUSG00000000001	0.787
diana_microt	MIMAT0000526	mmu-miR-15a-5p	Snx11	74479	ENSMUSG00000020876	0.787
diana_microt	MIMAT0000526	mmu-miR-15a-5p	Fntb	110606	ENSMUSG00000033373	0.787
diana_microt	MIMAT0000526	mmu-miR-15a-5p	Zdhhc11	71164	ENSMUSG00000069189	0.787
diana_microt	MIMAT0000526	mmu-miR-15a-5p	Ulk4	209012	ENSMUSG00000040936	0.787
diana_microt	MIMAT0000526	mmu-miR-15a-5p	4930563D23Rik	75328	ENSMUSG00000051728	0.786
diana_microt	MIMAT0000526	mmu-miR-15a-5p	Tmem255a	245386	ENSMUSG00000036502	0.786
diana_microt	MIMAT0000526	mmu-miR-15a-5p	Cab39	12283	ENSMUSG00000036707	0.785
diana_microt	MIMAT0000526	mmu-miR-15a-5p	Lhfpl4	269788	ENSMUSG00000042873	0.785
diana_microt	MIMAT0000526	mmu-miR-15a-5p	Zfp46	22704	ENSMUSG00000051351	0.785
diana_microt	MIMAT0000526	mmu-miR-15a-5p	Gpn1	74254	ENSMUSG00000064037	0.785
diana_microt	MIMAT0000526	mmu-miR-15a-5p	Pou4f2	18997	ENSMUSG00000031688	0.785
diana_microt	MIMAT0000526	mmu-miR-15a-5p	Tmem33	67878	ENSMUSG00000037720	0.785
diana_microt	MIMAT0000526	mmu-miR-15a-5p	Mtif3	76366	ENSMUSG00000016510	0.785
diana_microt	MIMAT0000526	mmu-miR-15a-5p	Fnbp1l	214459	ENSMUSG00000039735	0.785
diana_microt	MIMAT0000526	mmu-miR-15a-5p	Dnajb14	70604	ENSMUSG00000074212	0.784
diana_microt	MIMAT0000526	mmu-miR-15a-5p	Tacstd2	56753	ENSMUSG00000051397	0.783
diana_microt	MIMAT0000526	mmu-miR-15a-5p	Axin2	12006	ENSMUSG00000000142	0.783
diana_microt	MIMAT0000526	mmu-miR-15a-5p	Hpcal4	170638	ENSMUSG00000046093	0.782
diana_microt	MIMAT0000526	mmu-miR-15a-5p	Mtf1	17764	ENSMUSG00000028890	0.782
diana_microt	MIMAT0000526	mmu-miR-15a-5p	Nkd1	93960	ENSMUSG00000031661	0.781
diana_microt	MIMAT0000526	mmu-miR-15a-5p	Dopey1	320615	ENSMUSG00000034973	0.781
diana_microt	MIMAT0000526	mmu-miR-15a-5p	Kif21b	16565	ENSMUSG00000041642	0.781
diana_microt	MIMAT0000526	mmu-miR-15a-5p	Nfe2l1	18023	ENSMUSG00000038615	0.78
diana_microt	MIMAT0000526	mmu-miR-15a-5p	Ighmbp2	20589	ENSMUSG00000024831	0.778
diana_microt	MIMAT0000526	mmu-miR-15a-5p	Rims3	242662	ENSMUSG00000032890	0.777
diana_microt	MIMAT0000526	mmu-miR-15a-5p	Cpd	12874	ENSMUSG00000020841	0.777
diana_microt	MIMAT0000526	mmu-miR-15a-5p	Speer4f	70935	ENSMUSG00000058643	0.777
diana_microt	MIMAT0000526	mmu-miR-15a-5p	Tmtc1	387314	ENSMUSG00000030306	0.777
diana_microt	MIMAT0000526	mmu-miR-15a-5p	Enah	13800	ENSMUSG00000022995	0.776
diana_microt	MIMAT0000526	mmu-miR-15a-5p	Lrp1b	94217	ENSMUSG00000049252	0.775
diana_microt	MIMAT0000526	mmu-miR-15a-5p	Vgll1	170828	ENSMUSG00000031131	0.775
diana_microt	MIMAT0000526	mmu-miR-15a-5p	Tpt1	22070	ENSMUSG00000060126	0.775
diana_microt	MIMAT0000526	mmu-miR-15a-5p	Fbxl20	72194	ENSMUSG00000020883	0.775
diana_microt	MIMAT0000526	mmu-miR-15a-5p	Synj2	20975	ENSMUSG00000023805	0.774
diana_microt	MIMAT0000526	mmu-miR-15a-5p	Slco5a1	240726	ENSMUSG00000025938	0.774
diana_microt	MIMAT0000526	mmu-miR-15a-5p	Slc7a2	11988	ENSMUSG00000031596	0.773
diana_microt	MIMAT0000526	mmu-miR-15a-5p	Frmpd1	666060	ENSMUSG00000035615	0.773
diana_microt	MIMAT0000526	mmu-miR-15a-5p	Cntnap1	53321	ENSMUSG00000017167	0.773
diana_microt	MIMAT0000526	mmu-miR-15a-5p	Nlgn1	192167	ENSMUSG00000063887	0.773
diana_microt	MIMAT0000526	mmu-miR-15a-5p	Foxp2	114142	ENSMUSG00000029563	0.773
diana_microt	MIMAT0000526	mmu-miR-15a-5p	Ttpal	76080	ENSMUSG00000017679	0.773
diana_microt	MIMAT0000526	mmu-miR-15a-5p	Nf2	18016	ENSMUSG00000009073	0.772
diana_microt	MIMAT0000526	mmu-miR-15a-5p	Map7d2	78283	ENSMUSG00000041020	0.772
diana_microt	MIMAT0000526	mmu-miR-15a-5p	Mkks	59030	ENSMUSG00000027274	0.772
diana_microt	MIMAT0000526	mmu-miR-15a-5p	Rnf207	433809	ENSMUSG00000058498	0.772
diana_microt	MIMAT0000526	mmu-miR-15a-5p	1110018G07Rik	68497	ENSMUSG00000042350	0.772
diana_microt	MIMAT0000526	mmu-miR-15a-5p	Olfm3	229759	ENSMUSG00000027965	0.772
diana_microt	MIMAT0000526	mmu-miR-15a-5p	Dtl	76843	ENSMUSG00000037474	0.772
diana_microt	MIMAT0000526	mmu-miR-15a-5p	Diap1	13367	ENSMUSG00000024456	0.771
diana_microt	MIMAT0000526	mmu-miR-15a-5p	Fanci	208836	ENSMUSG00000039187	0.771
diana_microt	MIMAT0000526	mmu-miR-15a-5p	Eif4b	75705	ENSMUSG00000058655	0.771
diana_microt	MIMAT0000526	mmu-miR-15a-5p	Adarb1	110532	ENSMUSG00000020262	0.771
diana_microt	MIMAT0000526	mmu-miR-15a-5p	Ptprr	19279	ENSMUSG00000020151	0.771
diana_microt	MIMAT0000526	mmu-miR-15a-5p	Zfp831	100043757	ENSMUSG00000050600	0.77
diana_microt	MIMAT0000526	mmu-miR-15a-5p	Igf1	16000	ENSMUSG00000020053	0.77
diana_microt	MIMAT0000526	mmu-miR-15a-5p	Ammecr1	56068	ENSMUSG00000042225	0.77
diana_microt	MIMAT0000526	mmu-miR-15a-5p	Grid1	14803	ENSMUSG00000041078	0.77
diana_microt	MIMAT0000526	mmu-miR-15a-5p	Ciapin1	109006	ENSMUSG00000031781	0.769
diana_microt	MIMAT0000526	mmu-miR-15a-5p	Anks1	224650	ENSMUSG00000024219	0.769
diana_microt	MIMAT0000526	mmu-miR-15a-5p	Arhgap5	11855	ENSMUSG00000035133	0.769
diana_microt	MIMAT0000526	mmu-miR-15a-5p	Nav1	215690	ENSMUSG00000009418	0.769
diana_microt	MIMAT0000526	mmu-miR-15a-5p	Ahi1	52906	ENSMUSG00000019986	0.769
diana_microt	MIMAT0000526	mmu-miR-15a-5p	Xkr5	319581	ENSMUSG00000039814	0.768
diana_microt	MIMAT0000526	mmu-miR-15a-5p	Pla2g15	192654	ENSMUSG00000031903	0.768
diana_microt	MIMAT0000526	mmu-miR-15a-5p	Gm6526		ENSMUSG00000091698	0.768
diana_microt	MIMAT0000526	mmu-miR-15a-5p	Gpr98	110789	ENSMUSG00000069170	0.768
diana_microt	MIMAT0000526	mmu-miR-15a-5p	Wdr4	57773	ENSMUSG00000024037	0.767
diana_microt	MIMAT0000526	mmu-miR-15a-5p	C2cd3	277939	ENSMUSG00000047248	0.767
diana_microt	MIMAT0000526	mmu-miR-15a-5p	Dmpk	13400	ENSMUSG00000030409	0.767
diana_microt	MIMAT0000526	mmu-miR-15a-5p	Cdc42ep2	104252	ENSMUSG00000045664	0.767
diana_microt	MIMAT0000526	mmu-miR-15a-5p	Mfap3l	71306	ENSMUSG00000031647	0.766
diana_microt	MIMAT0000526	mmu-miR-15a-5p	Sowahb	78088	ENSMUSG00000045314	0.766
diana_microt	MIMAT0000526	mmu-miR-15a-5p	B3gnt6	272411	ENSMUSG00000074004	0.765
diana_microt	MIMAT0000526	mmu-miR-15a-5p	Mllt6	246198	ENSMUSG00000038437	0.765
diana_microt	MIMAT0000526	mmu-miR-15a-5p	Zfp92	22754	ENSMUSG00000031374	0.765
diana_microt	MIMAT0000526	mmu-miR-15a-5p	Itpr1	16438	ENSMUSG00000030102	0.763
diana_microt	MIMAT0000526	mmu-miR-15a-5p	Cul4a	99375	ENSMUSG00000031446	0.763
diana_microt	MIMAT0000526	mmu-miR-15a-5p	Grlf1	232906	ENSMUSG00000058230	0.763
diana_microt	MIMAT0000526	mmu-miR-15a-5p	Lurap1	68075	ENSMUSG00000028701	0.763
elmmo	MIMAT0000526	mmu-miR-15a-5p	Pcdha11	116731	ENSMUSG00000007440	0.799
elmmo	MIMAT0000526	mmu-miR-15a-5p	Pcdha4	353237	ENSMUSG00000007440	0.799
elmmo	MIMAT0000526	mmu-miR-15a-5p	Pcdha9	192161	ENSMUSG00000007440	0.799
elmmo	MIMAT0000526	mmu-miR-15a-5p	Smad7	17131	ENSMUSG00000025880	0.799
elmmo	MIMAT0000526	mmu-miR-15a-5p	Ubn2	320538	ENSMUSG00000038538	0.799
elmmo	MIMAT0000526	mmu-miR-15a-5p	Pcdha11	12936	ENSMUSG00000007440	0.799
elmmo	MIMAT0000526	mmu-miR-15a-5p	Pcdha4	192164	ENSMUSG00000007440	0.799
elmmo	MIMAT0000526	mmu-miR-15a-5p	Pcdha9	12942	ENSMUSG00000007440	0.799
elmmo	MIMAT0000526	mmu-miR-15a-5p	Pcdha10	353234	ENSMUSG00000007440	0.799
elmmo	MIMAT0000526	mmu-miR-15a-5p	Pcdha4	12943	ENSMUSG00000007440	0.799
elmmo	MIMAT0000526	mmu-miR-15a-5p	Akt3	23797	ENSMUSG00000019699	0.799
elmmo	MIMAT0000526	mmu-miR-15a-5p	Pcdhac2	353236	ENSMUSG00000007440	0.799
elmmo	MIMAT0000526	mmu-miR-15a-5p	Pcdha10	116731	ENSMUSG00000007440	0.799
elmmo	MIMAT0000526	mmu-miR-15a-5p	Pcdha2	353237	ENSMUSG00000007440	0.799
elmmo	MIMAT0000526	mmu-miR-15a-5p	Pcdhac2	192161	ENSMUSG00000007440	0.799
elmmo	MIMAT0000526	mmu-miR-15a-5p	Fbxw7	50754	ENSMUSG00000028086	0.799
elmmo	MIMAT0000526	mmu-miR-15a-5p	Arhgap20	244867	ENSMUSG00000053199	0.799
elmmo	MIMAT0000526	mmu-miR-15a-5p	Pcdha10	12936	ENSMUSG00000007440	0.799
elmmo	MIMAT0000526	mmu-miR-15a-5p	Pcdha2	192164	ENSMUSG00000007440	0.799
elmmo	MIMAT0000526	mmu-miR-15a-5p	Pcdhac2	12942	ENSMUSG00000007440	0.799
elmmo	MIMAT0000526	mmu-miR-15a-5p	Vegfa	22339	ENSMUSG00000023951	0.799
elmmo	MIMAT0000526	mmu-miR-15a-5p	Smurf1	75788	ENSMUSG00000038780	0.799
elmmo	MIMAT0000526	mmu-miR-15a-5p	Ccne1	12447	ENSMUSG00000002068	0.799
elmmo	MIMAT0000526	mmu-miR-15a-5p	Pcdha1	353234	ENSMUSG00000007440	0.799
elmmo	MIMAT0000526	mmu-miR-15a-5p	Pcdha2	12943	ENSMUSG00000007440	0.799
elmmo	MIMAT0000526	mmu-miR-15a-5p	Tle4	21888	ENSMUSG00000024642	0.799
elmmo	MIMAT0000526	mmu-miR-15a-5p	Pcdhac1	353236	ENSMUSG00000007440	0.799
elmmo	MIMAT0000526	mmu-miR-15a-5p	Nufip2	68564	ENSMUSG00000037857	0.799
elmmo	MIMAT0000526	mmu-miR-15a-5p	Cacul1	78832	ENSMUSG00000033417	0.799
elmmo	MIMAT0000526	mmu-miR-15a-5p	Sema6d	214968	ENSMUSG00000027200	0.799
elmmo	MIMAT0000526	mmu-miR-15a-5p	Pcdha1	116731	ENSMUSG00000007440	0.799
elmmo	MIMAT0000526	mmu-miR-15a-5p	Pcdha12	353237	ENSMUSG00000007440	0.799
elmmo	MIMAT0000526	mmu-miR-15a-5p	Pcdhac1	192161	ENSMUSG00000007440	0.799
elmmo	MIMAT0000526	mmu-miR-15a-5p	Ptprd	19266	ENSMUSG00000028399	0.799
elmmo	MIMAT0000526	mmu-miR-15a-5p	Pcdha1	12936	ENSMUSG00000007440	0.799
elmmo	MIMAT0000526	mmu-miR-15a-5p	Pcdha12	192164	ENSMUSG00000007440	0.799
elmmo	MIMAT0000526	mmu-miR-15a-5p	Pcdhac1	12942	ENSMUSG00000007440	0.799
elmmo	MIMAT0000526	mmu-miR-15a-5p	Slc25a37	67712	ENSMUSG00000034248	0.799
elmmo	MIMAT0000526	mmu-miR-15a-5p	Pcdha12	12943	ENSMUSG00000007440	0.799
elmmo	MIMAT0000526	mmu-miR-15a-5p	Rbm6	19654	ENSMUSG00000032582	0.799
elmmo	MIMAT0000526	mmu-miR-15a-5p	Pcdha5	353236	ENSMUSG00000007440	0.799
elmmo	MIMAT0000526	mmu-miR-15a-5p	Zfhx4	80892	ENSMUSG00000025255	0.799
elmmo	MIMAT0000526	mmu-miR-15a-5p	Pcdha11	353237	ENSMUSG00000007440	0.799
elmmo	MIMAT0000526	mmu-miR-15a-5p	Ptpn3	545622	ENSMUSG00000038764	0.799
elmmo	MIMAT0000526	mmu-miR-15a-5p	Pcdha5	192161	ENSMUSG00000007440	0.799
elmmo	MIMAT0000526	mmu-miR-15a-5p	Socs6	54607	ENSMUSG00000056153	0.799
elmmo	MIMAT0000526	mmu-miR-15a-5p	Sall1	58198	ENSMUSG00000031665	0.799
elmmo	MIMAT0000526	mmu-miR-15a-5p	Pcdh9	211712	ENSMUSG00000055421	0.799
elmmo	MIMAT0000526	mmu-miR-15a-5p	Atxn2	20239	ENSMUSG00000042605	0.799
elmmo	MIMAT0000526	mmu-miR-15a-5p	Pcdha11	192164	ENSMUSG00000007440	0.799
elmmo	MIMAT0000526	mmu-miR-15a-5p	Pcdha5	12942	ENSMUSG00000007440	0.799
elmmo	MIMAT0000526	mmu-miR-15a-5p	Ddx3y	26900	ENSMUSG00000069045	0.799
elmmo	MIMAT0000526	mmu-miR-15a-5p	Pcdha9	353234	ENSMUSG00000007440	0.799
elmmo	MIMAT0000526	mmu-miR-15a-5p	Pcdha11	12943	ENSMUSG00000007440	0.799
elmmo	MIMAT0000526	mmu-miR-15a-5p	Pcdha4	353236	ENSMUSG00000007440	0.799
elmmo	MIMAT0000526	mmu-miR-15a-5p	Pcdha9	116731	ENSMUSG00000007440	0.799
elmmo	MIMAT0000526	mmu-miR-15a-5p	Pcdha10	353237	ENSMUSG00000007440	0.799
elmmo	MIMAT0000526	mmu-miR-15a-5p	Pcdha4	192161	ENSMUSG00000007440	0.799
elmmo	MIMAT0000526	mmu-miR-15a-5p	Pcdha9	12936	ENSMUSG00000007440	0.799
elmmo	MIMAT0000526	mmu-miR-15a-5p	Ccnd2	12444	ENSMUSG00000000184	0.799
elmmo	MIMAT0000526	mmu-miR-15a-5p	Pcdha10	192164	ENSMUSG00000007440	0.799
elmmo	MIMAT0000526	mmu-miR-15a-5p	Pcdha4	12942	ENSMUSG00000007440	0.799
elmmo	MIMAT0000526	mmu-miR-15a-5p	Pcdhac2	353234	ENSMUSG00000007440	0.799
elmmo	MIMAT0000526	mmu-miR-15a-5p	Mob4	19070	ENSMUSG00000025979	0.799
elmmo	MIMAT0000526	mmu-miR-15a-5p	Pcdha10	12943	ENSMUSG00000007440	0.799
elmmo	MIMAT0000526	mmu-miR-15a-5p	Pcdha2	353236	ENSMUSG00000007440	0.799
elmmo	MIMAT0000526	mmu-miR-15a-5p	Pcdhac2	116731	ENSMUSG00000007440	0.799
elmmo	MIMAT0000526	mmu-miR-15a-5p	Med26	70625	ENSMUSG00000045248	0.799
elmmo	MIMAT0000526	mmu-miR-15a-5p	Wnt7a	22421	ENSMUSG00000030093	0.799
elmmo	MIMAT0000526	mmu-miR-15a-5p	Pcdha1	353237	ENSMUSG00000007440	0.799
elmmo	MIMAT0000526	mmu-miR-15a-5p	Pcdha2	192161	ENSMUSG00000007440	0.799
elmmo	MIMAT0000526	mmu-miR-15a-5p	Pcdhac2	12936	ENSMUSG00000007440	0.799
elmmo	MIMAT0000526	mmu-miR-15a-5p	Wee1	22390	ENSMUSG00000031016	0.799
elmmo	MIMAT0000526	mmu-miR-15a-5p	Pcdha1	192164	ENSMUSG00000007440	0.799
elmmo	MIMAT0000526	mmu-miR-15a-5p	Pcdha2	12942	ENSMUSG00000007440	0.799
elmmo	MIMAT0000526	mmu-miR-15a-5p	Pcdhac1	353234	ENSMUSG00000007440	0.799
elmmo	MIMAT0000526	mmu-miR-15a-5p	Sgk1	20393	ENSMUSG00000019970	0.799
elmmo	MIMAT0000526	mmu-miR-15a-5p	Sobp	109205	ENSMUSG00000038248	0.799
elmmo	MIMAT0000526	mmu-miR-15a-5p	Pcdha1	12943	ENSMUSG00000007440	0.799
elmmo	MIMAT0000526	mmu-miR-15a-5p	Pcdha12	353236	ENSMUSG00000007440	0.799
elmmo	MIMAT0000526	mmu-miR-15a-5p	Pcdhac1	116731	ENSMUSG00000007440	0.799
elmmo	MIMAT0000526	mmu-miR-15a-5p	1700025G04Rik	69399	ENSMUSG00000032666	0.799
elmmo	MIMAT0000526	mmu-miR-15a-5p	Pcdha12	192161	ENSMUSG00000007440	0.799
elmmo	MIMAT0000526	mmu-miR-15a-5p	Pcdhac1	12936	ENSMUSG00000007440	0.799
elmmo	MIMAT0000526	mmu-miR-15a-5p	Ubr3	68795	ENSMUSG00000044308	0.799
elmmo	MIMAT0000526	mmu-miR-15a-5p	Pcdha12	12942	ENSMUSG00000007440	0.799
elmmo	MIMAT0000526	mmu-miR-15a-5p	Pcdha5	353234	ENSMUSG00000007440	0.799
elmmo	MIMAT0000526	mmu-miR-15a-5p	Pcdha11	353236	ENSMUSG00000007440	0.799
elmmo	MIMAT0000526	mmu-miR-15a-5p	Pcdha5	116731	ENSMUSG00000007440	0.799
elmmo	MIMAT0000526	mmu-miR-15a-5p	Pcdha9	353237	ENSMUSG00000007440	0.799
elmmo	MIMAT0000526	mmu-miR-15a-5p	Ash1l	192195	ENSMUSG00000028053	0.799
elmmo	MIMAT0000526	mmu-miR-15a-5p	Ddx3x	13205	ENSMUSG00000000787	0.799
elmmo	MIMAT0000526	mmu-miR-15a-5p	Pcdha11	192161	ENSMUSG00000007440	0.799
elmmo	MIMAT0000526	mmu-miR-15a-5p	Pcdha5	12936	ENSMUSG00000007440	0.799
elmmo	MIMAT0000526	mmu-miR-15a-5p	Pcdha9	192164	ENSMUSG00000007440	0.799
elmmo	MIMAT0000526	mmu-miR-15a-5p	Cdc37l1	67072	ENSMUSG00000024780	0.799
elmmo	MIMAT0000526	mmu-miR-15a-5p	Tmem55a	72519	ENSMUSG00000028221	0.799
elmmo	MIMAT0000526	mmu-miR-15a-5p	Slit2	20563	ENSMUSG00000031558	0.799
elmmo	MIMAT0000526	mmu-miR-15a-5p	Pcdha11	12942	ENSMUSG00000007440	0.799
elmmo	MIMAT0000526	mmu-miR-15a-5p	Pcdha4	353234	ENSMUSG00000007440	0.799
elmmo	MIMAT0000526	mmu-miR-15a-5p	Pcdha9	12943	ENSMUSG00000007440	0.799
elmmo	MIMAT0000526	mmu-miR-15a-5p	Crebrf	77128	ENSMUSG00000048249	0.799
elmmo	MIMAT0000526	mmu-miR-15a-5p	Slc4a4	54403	ENSMUSG00000060961	0.799
elmmo	MIMAT0000526	mmu-miR-15a-5p	Pcdha10	353236	ENSMUSG00000007440	0.799
elmmo	MIMAT0000526	mmu-miR-15a-5p	Pcdha4	116731	ENSMUSG00000007440	0.799
elmmo	MIMAT0000526	mmu-miR-15a-5p	Tenm2	23964	ENSMUSG00000049336	0.799
elmmo	MIMAT0000526	mmu-miR-15a-5p	Pcdhac2	353237	ENSMUSG00000007440	0.799
elmmo	MIMAT0000526	mmu-miR-15a-5p	Pcdha10	192161	ENSMUSG00000007440	0.799
elmmo	MIMAT0000526	mmu-miR-15a-5p	Pcdha4	12936	ENSMUSG00000007440	0.799
elmmo	MIMAT0000526	mmu-miR-15a-5p	Pcdhac2	192164	ENSMUSG00000007440	0.799
elmmo	MIMAT0000526	mmu-miR-15a-5p	Rreb1	68750	ENSMUSG00000039087	0.799
elmmo	MIMAT0000526	mmu-miR-15a-5p	Bcl2	12043	ENSMUSG00000057329	0.799
elmmo	MIMAT0000526	mmu-miR-15a-5p	Pcdha10	12942	ENSMUSG00000007440	0.799
elmmo	MIMAT0000526	mmu-miR-15a-5p	Pcdha2	353234	ENSMUSG00000007440	0.799
elmmo	MIMAT0000526	mmu-miR-15a-5p	Pcdhac2	12943	ENSMUSG00000007440	0.799
elmmo	MIMAT0000526	mmu-miR-15a-5p	Tlk1	228012	ENSMUSG00000041997	0.799
elmmo	MIMAT0000526	mmu-miR-15a-5p	Pcdha1	353236	ENSMUSG00000007440	0.799
elmmo	MIMAT0000526	mmu-miR-15a-5p	Pcdha2	116731	ENSMUSG00000007440	0.799
elmmo	MIMAT0000526	mmu-miR-15a-5p	Pcdhac1	353237	ENSMUSG00000007440	0.799
elmmo	MIMAT0000526	mmu-miR-15a-5p	Reck	53614	ENSMUSG00000028476	0.799
elmmo	MIMAT0000526	mmu-miR-15a-5p	Cpeb2	231207	ENSMUSG00000039782	0.799
elmmo	MIMAT0000526	mmu-miR-15a-5p	Pcdha1	192161	ENSMUSG00000007440	0.799
elmmo	MIMAT0000526	mmu-miR-15a-5p	Pcdha2	12936	ENSMUSG00000007440	0.799
elmmo	MIMAT0000526	mmu-miR-15a-5p	Pcdhac1	192164	ENSMUSG00000007440	0.799
elmmo	MIMAT0000526	mmu-miR-15a-5p	Btrc	12234	ENSMUSG00000025217	0.799
elmmo	MIMAT0000526	mmu-miR-15a-5p	Pcdha1	12942	ENSMUSG00000007440	0.799
elmmo	MIMAT0000526	mmu-miR-15a-5p	Pcdha12	353234	ENSMUSG00000007440	0.799
elmmo	MIMAT0000526	mmu-miR-15a-5p	Pcdhac1	12943	ENSMUSG00000007440	0.799
elmmo	MIMAT0000526	mmu-miR-15a-5p	Qk	19317	ENSMUSG00000062078	0.799
elmmo	MIMAT0000526	mmu-miR-15a-5p	Ythdc1	231386	ENSMUSG00000035851	0.799
elmmo	MIMAT0000526	mmu-miR-15a-5p	8430427H17Rik	329540	ENSMUSG00000061411	0.799
elmmo	MIMAT0000526	mmu-miR-15a-5p	Pcdha12	116731	ENSMUSG00000007440	0.799
elmmo	MIMAT0000526	mmu-miR-15a-5p	Pcdha5	353237	ENSMUSG00000007440	0.799
elmmo	MIMAT0000526	mmu-miR-15a-5p	Ube4b	63958	ENSMUSG00000028960	0.799
elmmo	MIMAT0000526	mmu-miR-15a-5p	Rfx3	19726	ENSMUSG00000040929	0.799
elmmo	MIMAT0000526	mmu-miR-15a-5p	Prdm4	72843	ENSMUSG00000035529	0.799
elmmo	MIMAT0000526	mmu-miR-15a-5p	Pcdha12	12936	ENSMUSG00000007440	0.799
elmmo	MIMAT0000526	mmu-miR-15a-5p	Pcdha5	192164	ENSMUSG00000007440	0.799
elmmo	MIMAT0000526	mmu-miR-15a-5p	N4bp1	80750	ENSMUSG00000031652	0.799
elmmo	MIMAT0000526	mmu-miR-15a-5p	Myb	17863	ENSMUSG00000019982	0.799
elmmo	MIMAT0000526	mmu-miR-15a-5p	E2f3	13557	ENSMUSG00000016477	0.799
elmmo	MIMAT0000526	mmu-miR-15a-5p	Pcdha11	353234	ENSMUSG00000007440	0.799
elmmo	MIMAT0000526	mmu-miR-15a-5p	Pcdha5	12943	ENSMUSG00000007440	0.799
elmmo	MIMAT0000526	mmu-miR-15a-5p	Pcdha9	353236	ENSMUSG00000007440	0.799
elmmo	MIMAT0000526	mmu-miR-15a-5p	Rspo3	72780	ENSMUSG00000019880	0.799
elmmo	MIMAT0000526	mmu-miR-15a-5p	Dclk1	13175	ENSMUSG00000027797	0.799
elmmo	MIMAT0000526	mmu-miR-15a-5p	Cops2	12848	ENSMUSG00000027206	0.769
elmmo	MIMAT0000526	mmu-miR-15a-5p	Tmem206	66950	ENSMUSG00000026627	0.769
elmmo	MIMAT0000526	mmu-miR-15a-5p	Lphn2	99633	ENSMUSG00000028184	0.769
elmmo	MIMAT0000526	mmu-miR-15a-5p	Setd3	52690	ENSMUSG00000056770	0.769
elmmo	MIMAT0000526	mmu-miR-15a-5p	Eif4e	13684	ENSMUSG00000028156	0.769
elmmo	MIMAT0000526	mmu-miR-15a-5p	Sfrs18	66625	ENSMUSG00000028248	0.769
elmmo	MIMAT0000526	mmu-miR-15a-5p	Tsc22d2	72033	ENSMUSG00000027806	0.769
elmmo	MIMAT0000526	mmu-miR-15a-5p	Col4a3bp	68018	ENSMUSG00000021669	0.769
elmmo	MIMAT0000526	mmu-miR-15a-5p	Dcun1d4	100737	ENSMUSG00000051674	0.769
elmmo	MIMAT0000526	mmu-miR-15a-5p	Plxna2	18845	ENSMUSG00000026640	0.769
elmmo	MIMAT0000526	mmu-miR-15a-5p	Hnrnpa2b1	100045191	ENSMUSG00000004980	0.769
elmmo	MIMAT0000526	mmu-miR-15a-5p	Bach2	12014	ENSMUSG00000040270	0.769
elmmo	MIMAT0000526	mmu-miR-15a-5p	Crk	12928	ENSMUSG00000017776	0.769
elmmo	MIMAT0000526	mmu-miR-15a-5p	Col12a1	12816	ENSMUSG00000032332	0.769
elmmo	MIMAT0000526	mmu-miR-15a-5p	Zfp532	328977	ENSMUSG00000042439	0.769
elmmo	MIMAT0000526	mmu-miR-15a-5p	Nfe2l1	18023	ENSMUSG00000038615	0.769
elmmo	MIMAT0000526	mmu-miR-15a-5p	Myt1l	17933	ENSMUSG00000061911	0.769
elmmo	MIMAT0000526	mmu-miR-15a-5p	Atp13a3	224088	ENSMUSG00000022533	0.769
elmmo	MIMAT0000526	mmu-miR-15a-5p	Stradb	227154	ENSMUSG00000026027	0.769
elmmo	MIMAT0000526	mmu-miR-15a-5p	Kpna3	16648	ENSMUSG00000021929	0.769
elmmo	MIMAT0000526	mmu-miR-15a-5p	Wee1	22390	ENSMUSG00000031016	0.769
elmmo	MIMAT0000526	mmu-miR-15a-5p	Ube2v1	66589	ENSMUSG00000078923	0.769
elmmo	MIMAT0000526	mmu-miR-15a-5p	Pappa2	23850	ENSMUSG00000073530	0.769
elmmo	MIMAT0000526	mmu-miR-15a-5p	Zfp423	94187	ENSMUSG00000045333	0.769
elmmo	MIMAT0000526	mmu-miR-15a-5p	Tnrc6b	213988	ENSMUSG00000047888	0.769
elmmo	MIMAT0000526	mmu-miR-15a-5p	Lrig1	16206	ENSMUSG00000030029	0.769
elmmo	MIMAT0000526	mmu-miR-15a-5p	Tspan5	56224	ENSMUSG00000028152	0.769
elmmo	MIMAT0000526	mmu-miR-15a-5p	Serbp1	66870	ENSMUSG00000036371	0.769
elmmo	MIMAT0000526	mmu-miR-15a-5p	Hectd1	207304	ENSMUSG00000035247	0.769
elmmo	MIMAT0000526	mmu-miR-15a-5p	Pdcd4	18569	ENSMUSG00000024975	0.769
elmmo	MIMAT0000526	mmu-miR-15a-5p	Wapal	218914	ENSMUSG00000041408	0.769
elmmo	MIMAT0000526	mmu-miR-15a-5p	Dll4	54485	ENSMUSG00000027314	0.769
elmmo	MIMAT0000526	mmu-miR-15a-5p	1810013L24Rik	69053	ENSMUSG00000022507	0.769
elmmo	MIMAT0000526	mmu-miR-15a-5p	Braf	109880	ENSMUSG00000002413	0.769
elmmo	MIMAT0000526	mmu-miR-15a-5p	Map2k4	26398	ENSMUSG00000033352	0.769
elmmo	MIMAT0000526	mmu-miR-15a-5p	Efnb2	13642	ENSMUSG00000001300	0.769
elmmo	MIMAT0000526	mmu-miR-15a-5p	Ankib1	70797	ENSMUSG00000040351	0.769
elmmo	MIMAT0000526	mmu-miR-15a-5p	Pdap1	231887	ENSMUSG00000029623	0.769
elmmo	MIMAT0000526	mmu-miR-15a-5p	Bdnf	12064	ENSMUSG00000048482	0.769
elmmo	MIMAT0000526	mmu-miR-15a-5p	Ago4	76850	ENSMUSG00000042500	0.769
elmmo	MIMAT0000526	mmu-miR-15a-5p	Fgf7	14178	ENSMUSG00000027208	0.769
elmmo	MIMAT0000526	mmu-miR-15a-5p	Wdr47	99512	ENSMUSG00000040389	0.769
elmmo	MIMAT0000526	mmu-miR-15a-5p	Runx1t1	12395	ENSMUSG00000006586	0.769
elmmo	MIMAT0000526	mmu-miR-15a-5p	Hipk3	15259	ENSMUSG00000027177	0.769
elmmo	MIMAT0000526	mmu-miR-15a-5p	Fam133b	68152	ENSMUSG00000058503	0.769
elmmo	MIMAT0000526	mmu-miR-15a-5p	Fryl	72313	ENSMUSG00000070733	0.769
elmmo	MIMAT0000526	mmu-miR-15a-5p	Kctd1	106931	ENSMUSG00000036225	0.769
elmmo	MIMAT0000526	mmu-miR-15a-5p	Cab39	12283	ENSMUSG00000036707	0.769
elmmo	MIMAT0000526	mmu-miR-15a-5p	Ppm1e	320472	ENSMUSG00000046442	0.769
elmmo	MIMAT0000526	mmu-miR-15a-5p	Lats1	16798	ENSMUSG00000040021	0.769
elmmo	MIMAT0000526	mmu-miR-15a-5p	Fbxo33	70611	ENSMUSG00000035329	0.769
elmmo	MIMAT0000526	mmu-miR-15a-5p	Pim1	18712	ENSMUSG00000024014	0.769
elmmo	MIMAT0000526	mmu-miR-15a-5p	E2f7	52679	ENSMUSG00000020185	0.769
elmmo	MIMAT0000526	mmu-miR-15a-5p	Kif1b	16561	ENSMUSG00000063077	0.769
elmmo	MIMAT0000526	mmu-miR-15a-5p	Hnrnpa2b1	53379	ENSMUSG00000004980	0.769
elmmo	MIMAT0000526	mmu-miR-15a-5p	Scoc	56367	ENSMUSG00000063253	0.769
elmmo	MIMAT0000526	mmu-miR-15a-5p	Mtmr4	170749	ENSMUSG00000018401	0.769
elmmo	MIMAT0000526	mmu-miR-15a-5p	Fermt2	218952	ENSMUSG00000037712	0.769
elmmo	MIMAT0000526	mmu-miR-15a-5p	Bptf	207165	ENSMUSG00000040481	0.769
elmmo	MIMAT0000526	mmu-miR-15a-5p	Nxph1	18231	ENSMUSG00000046178	0.769
elmmo	MIMAT0000526	mmu-miR-15a-5p	Zc3h6	78751	ENSMUSG00000042851	0.769
elmmo	MIMAT0000526	mmu-miR-15a-5p	Bmpr1a	12166	ENSMUSG00000021796	0.769
elmmo	MIMAT0000526	mmu-miR-15a-5p	Ywhaq	22630	ENSMUSG00000076432	0.769
elmmo	MIMAT0000526	mmu-miR-15a-5p	Mapk8	26419	ENSMUSG00000021936	0.769
elmmo	MIMAT0000526	mmu-miR-15a-5p	Dnaja2	56445	ENSMUSG00000031701	0.769
elmmo	MIMAT0000526	mmu-miR-15a-5p	Seh1l	72124	ENSMUSG00000079614	0.769
elmmo	MIMAT0000526	mmu-miR-15a-5p	Usp42	76800	ENSMUSG00000051306	0.769
[truncated: 2,372 more rows]

## Sheet: mmu-miR-15b-5p
database	mature_mirna_acc	mature_mirna_id	target_symbol	target_entrez	target_ensembl	score
[truncated: 3,353 more rows]

[truncated: 65 more sheets: mmu-miR-17-5p, mmu-miR-18a-3p, mmu-miR-20a-5p, mmu-miR-21a-3p, mmu-miR-22-5p, mmu-miR-23a-5p, mmu-miR-26a-5p, mmu-miR-27a-5p, mmu-miR-29a-5p, mmu-miR-30a-5p, mmu-miR-30c-5p, mmu-miR-30d-5p, mmu-miR-30e-5p, mmu-miR-32-5p, mmu-miR-34a-5p, mmu-miR-34c-5p, mmu-miR-96-5p, mmu-miR-99b-5p, mmu-miR-106b-5p, mmu-miR-125a-5p …]
