# Supplementary material for: RBiomirGS: an all-in-one miRNA gene set analysis solution featuring target mRNA mapping and expression profile integration
Source: PeerJ journal article supplement (doi:10.7717/peerj.4262), 2018-01-12
Supplement: suppl.zip [file liver_validated.xlsx]

## Sheet: mmu-miR-10b-5p
database	mature_mirna_id	target_symbol	target_entrez	target_ensembl	experiment	pubmed_id
mirecords	mmu-miR-10b-5p	Hoxd10	15430	ENSMUSG00000050368	immunoblotting	20351690
mirtarbase	mmu-miR-10b-5p	Hoxd10	15430	ENSMUSG00000050368	qRT-PCR//Western blot	20351690

## Sheet: mmu-miR-15a-5p
database	mature_mirna_id	target_symbol	target_entrez	target_ensembl	experiment	pubmed_id
mirecords	mmu-miR-15a-5p	Bcl2	12043	ENSMUSG00000057329	Western blot	20445066
mirecords	mmu-miR-15a-5p	Ccnd1	12443	ENSMUSG00000070348	fluorescence intensity	19723889
mirecords	mmu-miR-15a-5p	Slc12a2	20496	ENSMUSG00000024597		19416898
mirecords	mmu-miR-15a-5p	Cldn12	64945	ENSMUSG00000046798		19416898
mirecords	mmu-miR-15a-5p	Bdnf	12064	ENSMUSG00000048482		19416898
mirecords	mmu-miR-15a-5p	Ccnt2	72949	ENSMUSG00000026349	Western blot	21740905
mirtarbase	mmu-miR-15a-5p	Macf1	11426	ENSMUSG00000028649	Sequencing	19536157
mirtarbase	mmu-miR-15a-5p	Adam10	11487	ENSMUSG00000054693	Sequencing	19536157
mirtarbase	mmu-miR-15a-5p	Adam19	11492	ENSMUSG00000011256	Sequencing	19536157
mirtarbase	mmu-miR-15a-5p	Aebp2	11569	ENSMUSG00000030232	Sequencing	19536157
mirtarbase	mmu-miR-15a-5p	Angpt1	11600	ENSMUSG00000022309	Sequencing	19536157
mirtarbase	mmu-miR-15a-5p	Ak4	11639	ENSMUSG00000028527	Sequencing	19536157
mirtarbase	mmu-miR-15a-5p	Aldoa	11674	ENSMUSG00000030695	Sequencing	19536157
mirtarbase	mmu-miR-15a-5p	Ank3	11735	ENSMUSG00000069601	Sequencing	19536157
mirtarbase	mmu-miR-15a-5p	Ap3d1	11776	ENSMUSG00000020198	Sequencing	19536157
mirtarbase	mmu-miR-15a-5p	Aplp2	11804	ENSMUSG00000031996	Sequencing	19536157
mirtarbase	mmu-miR-15a-5p	Nr2f2	11819	ENSMUSG00000030551	Sequencing	19536157
mirtarbase	mmu-miR-15a-5p	App	11820	ENSMUSG00000022892	Sequencing	19536157
mirtarbase	mmu-miR-15a-5p	Atp2a2	11938	ENSMUSG00000029467	Sequencing	19536157
mirtarbase	mmu-miR-15a-5p	Atp7a	11977	ENSMUSG00000033792	Sequencing	19536157
mirtarbase	mmu-miR-15a-5p	Atrn	11990	ENSMUSG00000027312	Sequencing	19536157
mirtarbase	mmu-miR-15a-5p	Bcl2	12043	ENSMUSG00000057329	qRT-PCR//Western blot//Northern blot//Luciferase reporter assay	18931683
mirtarbase	mmu-miR-15a-5p	Bcl2	12043	ENSMUSG00000057329	Luciferase reporter assay//qRT-PCR//Western blot//Reporter assay;Western blot;qRT-PCR	20445066
mirtarbase	mmu-miR-15a-5p	Bcl2l1	12048	ENSMUSG00000007659	Western blot	20445066
mirtarbase	mmu-miR-15a-5p	Bicd1	12121	ENSMUSG00000003452	Sequencing	19536157
mirtarbase	mmu-miR-15a-5p	Bmpr1a	12166	ENSMUSG00000021796	Sequencing	19536157
mirtarbase	mmu-miR-15a-5p	Btrc	12234	ENSMUSG00000025217	Sequencing	19536157
mirtarbase	mmu-miR-15a-5p	Hyou1	12282	ENSMUSG00000032115	Sequencing	19536157
mirtarbase	mmu-miR-15a-5p	Cacnb2	12296	ENSMUSG00000057914	Sequencing	19536157
mirtarbase	mmu-miR-15a-5p	Capza2	12343	ENSMUSG00000015733	Sequencing	19536157
mirtarbase	mmu-miR-15a-5p	Cask	12361	ENSMUSG00000031012	Sequencing	19536157
mirtarbase	mmu-miR-15a-5p	Cbfa2t2	12396	ENSMUSG00000038533	Sequencing	19536157
mirtarbase	mmu-miR-15a-5p	Cbfa2t3	12398	ENSMUSG00000006362	Sequencing	19536157
mirtarbase	mmu-miR-15a-5p	Cbln1	12404	ENSMUSG00000031654	Sequencing	19536157
mirtarbase	mmu-miR-15a-5p	Cbx4	12418	ENSMUSG00000039989	Sequencing	19536157
mirtarbase	mmu-miR-15a-5p	Ccnd1	12443	ENSMUSG00000070348	qRT-PCR//Western blot//Northern blot//Luciferase reporter assay	18931683
mirtarbase	mmu-miR-15a-5p	Ccnd1	12443	ENSMUSG00000070348	Luciferase reporter assay	19723889
mirtarbase	mmu-miR-15a-5p	Ccnd1	12443	ENSMUSG00000070348	Sequencing	19536157
mirtarbase	mmu-miR-15a-5p	Entpd5	12499	ENSMUSG00000021236	Sequencing	19536157
mirtarbase	mmu-miR-15a-5p	Chka	12660	ENSMUSG00000024843	Sequencing	19536157
mirtarbase	mmu-miR-15a-5p	Clk1	12747	ENSMUSG00000026034	Sequencing	19536157
mirtarbase	mmu-miR-15a-5p	Clock	12753	ENSMUSG00000029238	Sequencing	19536157
mirtarbase	mmu-miR-15a-5p	Clu	12759	ENSMUSG00000022037	Sequencing	19536157
mirtarbase	mmu-miR-15a-5p	Hps3	12807	ENSMUSG00000027615	Sequencing	19536157
mirtarbase	mmu-miR-15a-5p	Col4a1	12826	ENSMUSG00000031502	Sequencing	19536157
mirtarbase	mmu-miR-15a-5p	Cops2	12848	ENSMUSG00000027206	Sequencing	19536157
mirtarbase	mmu-miR-15a-5p	Ncan	13004	ENSMUSG00000002341	Sequencing	19536157
mirtarbase	mmu-miR-15a-5p	Dclk1	13175	ENSMUSG00000027797	Sequencing	19536157
mirtarbase	mmu-miR-15a-5p	Dcc	13176	ENSMUSG00000060534	Sequencing	19536157
mirtarbase	mmu-miR-15a-5p	Ddx5	13207	ENSMUSG00000020719	Sequencing	19536157
mirtarbase	mmu-miR-15a-5p	Dync1i1	13426	ENSMUSG00000029757	Sequencing	19536157
mirtarbase	mmu-miR-15a-5p	Dyrk1a	13548	ENSMUSG00000022897	Sequencing	19536157
mirtarbase	mmu-miR-15a-5p	E2f3	13557	ENSMUSG00000016477	Sequencing	19536157
mirtarbase	mmu-miR-15a-5p	Ednrb	13618	ENSMUSG00000022122	Sequencing	19536157
mirtarbase	mmu-miR-15a-5p	Efna2	13637	ENSMUSG00000003070	Sequencing	19536157
mirtarbase	mmu-miR-15a-5p	Eln	13717	ENSMUSG00000029675	Luciferase reporter assay//Microarray//Western blot	21305018
mirtarbase	mmu-miR-15a-5p	Mark2	13728	ENSMUSG00000024969	Sequencing	19536157
mirtarbase	mmu-miR-15a-5p	En2	13799	ENSMUSG00000039095	Sequencing	19536157
mirtarbase	mmu-miR-15a-5p	Ext1	14042	ENSMUSG00000061731	Sequencing	19536157
mirtarbase	mmu-miR-15a-5p	Acsl1	14081	ENSMUSG00000018796	Sequencing	19536157
mirtarbase	mmu-miR-15a-5p	Fasn	14104	ENSMUSG00000025153	Sequencing	19536157
mirtarbase	mmu-miR-15a-5p	Lpin1	14245	ENSMUSG00000020593	Sequencing	19536157
mirtarbase	mmu-miR-15a-5p	Flot2	14252	ENSMUSG00000061981	Sequencing	19536157
mirtarbase	mmu-miR-15a-5p	Fnbp1	14269	ENSMUSG00000075415	Sequencing	19536157
mirtarbase	mmu-miR-15a-5p	Fstl1	14314	ENSMUSG00000022816	Sequencing	19536157
mirtarbase	mmu-miR-15a-5p	Fut9	14348	ENSMUSG00000055373	Sequencing	19536157
mirtarbase	mmu-miR-15a-5p	Gabpa	14390	ENSMUSG00000008976	Sequencing	19536157
mirtarbase	mmu-miR-15a-5p	Gabra1	14394	ENSMUSG00000010803	Sequencing	19536157
mirtarbase	mmu-miR-15a-5p	Glrp1	14659	ENSMUSG00000062310	Sequencing	19536157
mirtarbase	mmu-miR-15a-5p	Glud1	14661	ENSMUSG00000021794	Sequencing	19536157
mirtarbase	mmu-miR-15a-5p	Gnal	14680	ENSMUSG00000024524	Sequencing	19536157
mirtarbase	mmu-miR-15a-5p	Gnaq	14682	ENSMUSG00000024639	Sequencing	19536157
mirtarbase	mmu-miR-15a-5p	Gnas	14683	ENSMUSG00000027523	Sequencing	19536157
mirtarbase	mmu-miR-15a-5p	Grin1	14810	ENSMUSG00000026959	Sequencing	19536157
mirtarbase	mmu-miR-15a-5p	Hap1	15114	ENSMUSG00000006930	Sequencing	19536157
mirtarbase	mmu-miR-15a-5p	Hus1	15574	ENSMUSG00000020413	Sequencing	19536157
mirtarbase	mmu-miR-15a-5p	Igf1	16000	ENSMUSG00000020053	Sequencing	19536157
mirtarbase	mmu-miR-15a-5p	Igf1r	16001	ENSMUSG00000005533	Sequencing	19536157
mirtarbase	mmu-miR-15a-5p	Igfbp3	16009	ENSMUSG00000020427	Sequencing	19536157
mirtarbase	mmu-miR-15a-5p	Il18bp	16068	ENSMUSG00000070427	Sequencing	19536157
mirtarbase	mmu-miR-15a-5p	Ikbkg	16151	ENSMUSG00000004221	Sequencing	19536157
mirtarbase	mmu-miR-15a-5p	Kpnb1	16211	ENSMUSG00000001440	Sequencing	19536157
mirtarbase	mmu-miR-15a-5p	Itpr1	16438	ENSMUSG00000030102	Sequencing	19536157
mirtarbase	mmu-miR-15a-5p	Kcna1	16485	ENSMUSG00000047976	Sequencing	19536157
mirtarbase	mmu-miR-15a-5p	Kcnc3	16504	ENSMUSG00000062785	Sequencing	19536157
mirtarbase	mmu-miR-15a-5p	Kcnj10	16513	ENSMUSG00000044708	Sequencing	19536157
mirtarbase	mmu-miR-15a-5p	Kcnj2	16518	ENSMUSG00000041695	Sequencing	19536157
mirtarbase	mmu-miR-15a-5p	Kif13a	16553	ENSMUSG00000021375	Sequencing	19536157
mirtarbase	mmu-miR-15a-5p	Kif21b	16565	ENSMUSG00000041642	Sequencing	19536157
mirtarbase	mmu-miR-15a-5p	Kpna1	16646	ENSMUSG00000022905	Sequencing	19536157
mirtarbase	mmu-miR-15a-5p	Kpna3	16648	ENSMUSG00000021929	Sequencing	19536157
mirtarbase	mmu-miR-15a-5p	Smad2	17126	ENSMUSG00000024563	Sequencing	19536157
mirtarbase	mmu-miR-15a-5p	Smad4	17128	ENSMUSG00000024515	Sequencing	19536157
mirtarbase	mmu-miR-15a-5p	Smad7	17131	ENSMUSG00000025880	Sequencing	19536157
mirtarbase	mmu-miR-15a-5p	Man2a1	17158	ENSMUSG00000024085	Sequencing	19536157
mirtarbase	mmu-miR-15a-5p	Mcf2l	17207	ENSMUSG00000031442	Sequencing	19536157
mirtarbase	mmu-miR-15a-5p	Mgat3	17309	ENSMUSG00000042428	Sequencing	19536157
mirtarbase	mmu-miR-15a-5p	Foxk1	17425	ENSMUSG00000056493	Sequencing	19536157
mirtarbase	mmu-miR-15a-5p	Mov10	17454	ENSMUSG00000002227	Sequencing	19536157
mirtarbase	mmu-miR-15a-5p	Map1a	17754	ENSMUSG00000027254	Sequencing	19536157
mirtarbase	mmu-miR-15a-5p	Myo10	17909	ENSMUSG00000022272	Sequencing	19536157
mirtarbase	mmu-miR-15a-5p	Myo5a	17918	ENSMUSG00000034593	Sequencing	19536157
mirtarbase	mmu-miR-15a-5p	Nap1l4	17955	ENSMUSG00000059119	Sequencing	19536157
mirtarbase	mmu-miR-15a-5p	Ndufa4	17992	ENSMUSG00000029632	Sequencing	19536157
mirtarbase	mmu-miR-15a-5p	Neo1	18007	ENSMUSG00000032340	Sequencing	19536157
mirtarbase	mmu-miR-15a-5p	Neurod1	18012	ENSMUSG00000034701	Sequencing	19536157
mirtarbase	mmu-miR-15a-5p	Nf1	18015	ENSMUSG00000020716	Sequencing	19536157
mirtarbase	mmu-miR-15a-5p	Nfatc1	18018	ENSMUSG00000033016	Sequencing	19536157
mirtarbase	mmu-miR-15a-5p	Nfe2l1	18023	ENSMUSG00000038615	Sequencing	19536157
mirtarbase	mmu-miR-15a-5p	Slc11a2	18174	ENSMUSG00000023030	Sequencing	19536157
mirtarbase	mmu-miR-15a-5p	Omg	18377	ENSMUSG00000049612	Sequencing	19536157
mirtarbase	mmu-miR-15a-5p	P4hb	18453	ENSMUSG00000025130	Sequencing	19536157
mirtarbase	mmu-miR-15a-5p	Pafah1b1	18472	ENSMUSG00000020745	Sequencing	19536157
mirtarbase	mmu-miR-15a-5p	Padi2	18600	ENSMUSG00000028927	Sequencing	19536157
mirtarbase	mmu-miR-15a-5p	Peg3	18616	ENSMUSG00000002265	Sequencing	19536157
mirtarbase	mmu-miR-15a-5p	Pik3r1	18708	ENSMUSG00000041417	Sequencing	19536157
mirtarbase	mmu-miR-15a-5p	Pik3r3	18710	ENSMUSG00000028698	Sequencing	19536157
mirtarbase	mmu-miR-15a-5p	Pitpna	18738	ENSMUSG00000017781	Sequencing	19536157
mirtarbase	mmu-miR-15a-5p	Pld3	18807	ENSMUSG00000003363	Sequencing	19536157
mirtarbase	mmu-miR-15a-5p	Prkar2a	19087	ENSMUSG00000032601	Sequencing	19536157
mirtarbase	mmu-miR-15a-5p	Ptprd	19266	ENSMUSG00000028399	Sequencing	19536157
mirtarbase	mmu-miR-15a-5p	Abcd4	19300	ENSMUSG00000021240	Sequencing	19536157
mirtarbase	mmu-miR-15a-5p	Qk	19317	ENSMUSG00000062078	Sequencing	19536157
mirtarbase	mmu-miR-15a-5p	Rab34	19376	ENSMUSG00000002059	Sequencing	19536157
mirtarbase	mmu-miR-15a-5p	Pitpnm2	19679	ENSMUSG00000029406	Sequencing	19536157
mirtarbase	mmu-miR-15a-5p	Rev3l	19714	ENSMUSG00000019841	Sequencing	19536157
mirtarbase	mmu-miR-15a-5p	Rnf4	19822	ENSMUSG00000029110	Sequencing	19536157
mirtarbase	mmu-miR-15a-5p	Rtn3	20168	ENSMUSG00000024758	Sequencing	19536157
mirtarbase	mmu-miR-15a-5p	Ncor1	20185	ENSMUSG00000018501	Sequencing	19536157
mirtarbase	mmu-miR-15a-5p	Scd1	20249	ENSMUSG00000037071	Sequencing	19536157
mirtarbase	mmu-miR-15a-5p	Scn8a	20273	ENSMUSG00000023033	Sequencing	19536157
mirtarbase	mmu-miR-15a-5p	Cx3cl1	20312	ENSMUSG00000031778	Sequencing	19536157
mirtarbase	mmu-miR-15a-5p	Cxcl12	20315	ENSMUSG00000061353	Sequencing	19536157
mirtarbase	mmu-miR-15a-5p	Sema3a	20346	ENSMUSG00000028883	Sequencing	19536157
mirtarbase	mmu-miR-15a-5p	Ski	20481	ENSMUSG00000029050	Sequencing	19536157
mirtarbase	mmu-miR-15a-5p	Slc12a2	20496	ENSMUSG00000024597	Sequencing	19536157
mirtarbase	mmu-miR-15a-5p	Slc2a3	20527	ENSMUSG00000003153	Sequencing	19536157
mirtarbase	mmu-miR-15a-5p	Slc31a1	20529	ENSMUSG00000066150	Sequencing	19536157
mirtarbase	mmu-miR-15a-5p	Sstr1	20605	ENSMUSG00000035431	Sequencing	19536157
mirtarbase	mmu-miR-15a-5p	Plk2	20620	ENSMUSG00000021701	Sequencing	19536157
mirtarbase	mmu-miR-15a-5p	Sos1	20662	ENSMUSG00000024241	Sequencing	19536157
mirtarbase	mmu-miR-15a-5p	Sparc	20692	ENSMUSG00000018593	Sequencing	19536157
mirtarbase	mmu-miR-15a-5p	Sptbn2	20743	ENSMUSG00000067889	Sequencing	19536157
mirtarbase	mmu-miR-15a-5p	Srp14	20813	ENSMUSG00000009549	Sequencing	19536157
mirtarbase	mmu-miR-15a-5p	Stat2	20847	ENSMUSG00000040033	Sequencing	19536157
mirtarbase	mmu-miR-15a-5p	Stxbp3a	20912	ENSMUSG00000027882	Sequencing	19536157
mirtarbase	mmu-miR-15a-5p	Sucla2	20916	ENSMUSG00000022110	Sequencing	19536157
mirtarbase	mmu-miR-15a-5p	Syt3	20981	ENSMUSG00000030731	Sequencing	19536157
mirtarbase	mmu-miR-15a-5p	Tsc22d1	21807	ENSMUSG00000022010	Sequencing	19536157
mirtarbase	mmu-miR-15a-5p	Tgfbr1	21812	ENSMUSG00000007613	Sequencing	19536157
mirtarbase	mmu-miR-15a-5p	Tle4	21888	ENSMUSG00000024642	Sequencing	19536157
mirtarbase	mmu-miR-15a-5p	Tspan7	21912	ENSMUSG00000058254	Sequencing	19536157
mirtarbase	mmu-miR-15a-5p	Dedd	21945	ENSMUSG00000013973	Sequencing	19536157
mirtarbase	mmu-miR-15a-5p	Tnks	21951	ENSMUSG00000031529	Sequencing	19536157
mirtarbase	mmu-miR-15a-5p	Nr2c2	22026	ENSMUSG00000005893	Sequencing	19536157
mirtarbase	mmu-miR-15a-5p	Traf3	22031	ENSMUSG00000021277	Sequencing	19536157
mirtarbase	mmu-miR-15a-5p	Ttc3	22129	ENSMUSG00000040785	Sequencing	19536157
mirtarbase	mmu-miR-15a-5p	Tubb5	22154	ENSMUSG00000001525	Sequencing	19536157
mirtarbase	mmu-miR-15a-5p	Uba1	22201	ENSMUSG00000001924	Sequencing	19536157
mirtarbase	mmu-miR-15a-5p	Utrn	22288	ENSMUSG00000019820	Sequencing	19536157
mirtarbase	mmu-miR-15a-5p	Kdm6a	22289	ENSMUSG00000037369	Sequencing	19536157
mirtarbase	mmu-miR-15a-5p	Vhl	22346	ENSMUSG00000033933	Sequencing	19536157
mirtarbase	mmu-miR-15a-5p	Wee1	22390	ENSMUSG00000031016	Sequencing	19536157
mirtarbase	mmu-miR-15a-5p	Wnt3a	22416	ENSMUSG00000009900	qRT-PCR//Western blot//Northern blot//Luciferase reporter assay	18931683
mirtarbase	mmu-miR-15a-5p	Ywhae	22627	ENSMUSG00000020849	Sequencing	19536157
mirtarbase	mmu-miR-15a-5p	Ywhag	22628	ENSMUSG00000051391	Sequencing	19536157
mirtarbase	mmu-miR-15a-5p	Plagl1	22634	ENSMUSG00000019817	Sequencing	19536157
mirtarbase	mmu-miR-15a-5p	Amfr	23802	ENSMUSG00000031751	Sequencing	19536157
mirtarbase	mmu-miR-15a-5p	Grem2	23893	ENSMUSG00000050069	Sequencing	19536157
mirtarbase	mmu-miR-15a-5p	Mgll	23945	ENSMUSG00000033174	Sequencing	19536157
mirtarbase	mmu-miR-15a-5p	Tenm3	23965	ENSMUSG00000031561	Sequencing	19536157
mirtarbase	mmu-miR-15a-5p	Sept3	24050	ENSMUSG00000022456	Sequencing	19536157
mirtarbase	mmu-miR-15a-5p	Gm16515	24083	ENSMUSG00000018931	Sequencing	19536157
mirtarbase	mmu-miR-15a-5p	Mapk3	26417	ENSMUSG00000063065	Sequencing	19536157
mirtarbase	mmu-miR-15a-5p	Git2	26431	ENSMUSG00000041890	Sequencing	19536157
mirtarbase	mmu-miR-15a-5p	Slc27a1	26457	ENSMUSG00000031808	Sequencing	19536157
mirtarbase	mmu-miR-15a-5p	Serinc3	26943	ENSMUSG00000017707	Sequencing	19536157
mirtarbase	mmu-miR-15a-5p	Zw10	26951	ENSMUSG00000032264	Sequencing	19536157
mirtarbase	mmu-miR-15a-5p	Etv3	27049	ENSMUSG00000003382	Sequencing	19536157
mirtarbase	mmu-miR-15a-5p	Cadps	27062	ENSMUSG00000054423	Sequencing	19536157
mirtarbase	mmu-miR-15a-5p	Zfp275	27081	ENSMUSG00000031365	Sequencing	19536157
mirtarbase	mmu-miR-15a-5p	Prmt5	27374	ENSMUSG00000023110	Sequencing	19536157
mirtarbase	mmu-miR-15a-5p	Polr2m	28015	ENSMUSG00000032199	Sequencing	19536157
mirtarbase	mmu-miR-15a-5p	Sult4a1	29859	ENSMUSG00000018865	Sequencing	19536157
mirtarbase	mmu-miR-15a-5p	Mlf2	30853	ENSMUSG00000030120	Sequencing	19536157
mirtarbase	mmu-miR-15a-5p	Apln	30878	ENSMUSG00000037010	Sequencing	19536157
mirtarbase	mmu-miR-15a-5p	Dlc1	50768	ENSMUSG00000031523	Sequencing	19536157
mirtarbase	mmu-miR-15a-5p	Atp9b	50771	ENSMUSG00000024566	Sequencing	19536157
mirtarbase	mmu-miR-15a-5p	Hs6st1	50785	ENSMUSG00000045216	Sequencing	19536157
mirtarbase	mmu-miR-15a-5p	Gne	50798	ENSMUSG00000028479	Sequencing	19536157
mirtarbase	mmu-miR-15a-5p	Rnf24	51902	ENSMUSG00000048911	Sequencing	19536157
mirtarbase	mmu-miR-15a-5p	Reep1	52250	ENSMUSG00000052852	Sequencing	19536157
mirtarbase	mmu-miR-15a-5p	Gpr123	52389	ENSMUSG00000025475	Sequencing	19536157
mirtarbase	mmu-miR-15a-5p	Ctdsp2	52468	ENSMUSG00000078429	Sequencing	19536157
mirtarbase	mmu-miR-15a-5p	Brms1l	52592	ENSMUSG00000012076	Sequencing	19536157
mirtarbase	mmu-miR-15a-5p	Tmx4	52837	ENSMUSG00000034723	Sequencing	19536157
mirtarbase	mmu-miR-15a-5p	Ahi1	52906	ENSMUSG00000019986	Sequencing	19536157
mirtarbase	mmu-miR-15a-5p	Zmiz2	52915	ENSMUSG00000041164	Sequencing	19536157
mirtarbase	mmu-miR-15a-5p	Cntnap1	53321	ENSMUSG00000017167	Sequencing	19536157
mirtarbase	mmu-miR-15a-5p	Hnrnpa2b1	53379	ENSMUSG00000004980	Sequencing	19536157
mirtarbase	mmu-miR-15a-5p	Exoc7	53413	ENSMUSG00000020792	Sequencing	19536157
mirtarbase	mmu-miR-15a-5p	Rcan2	53901	ENSMUSG00000039601	Sequencing	19536157
mirtarbase	mmu-miR-15a-5p	Dll4	54485	ENSMUSG00000027314	Sequencing	19536157
mirtarbase	mmu-miR-15a-5p	Nup210	54563	ENSMUSG00000030091	Sequencing	19536157
mirtarbase	mmu-miR-15a-5p	Pcnx	54604	ENSMUSG00000021140	Sequencing	19536157
mirtarbase	mmu-miR-15a-5p	Extl3	54616	ENSMUSG00000021978	Sequencing	19536157
mirtarbase	mmu-miR-15a-5p	Cadm1	54725	ENSMUSG00000032076	Luciferase reporter assay//Reporter assay;Other	18362358
mirtarbase	mmu-miR-15a-5p	Cadm1	54725	ENSMUSG00000032076	Sequencing	19536157
mirtarbase	mmu-miR-15a-5p	Slc1a4	55963	ENSMUSG00000020142	Sequencing	19536157
mirtarbase	mmu-miR-15a-5p	Olfm1	56177	ENSMUSG00000026833	Sequencing	19536157
mirtarbase	mmu-miR-15a-5p	Stam2	56324	ENSMUSG00000055371	Sequencing	19536157
mirtarbase	mmu-miR-15a-5p	Amotl2	56332	ENSMUSG00000032531	Sequencing	19536157
mirtarbase	mmu-miR-15a-5p	Txnip	56338	ENSMUSG00000038393	Sequencing	19536157
mirtarbase	mmu-miR-15a-5p	B4galt6	56386	ENSMUSG00000056124	Sequencing	19536157
mirtarbase	mmu-miR-15a-5p	Serinc1	56442	ENSMUSG00000019877	Sequencing	19536157
mirtarbase	mmu-miR-15a-5p	Tbk1	56480	ENSMUSG00000020115	Sequencing	19536157
mirtarbase	mmu-miR-15a-5p	Sec11a	56529	ENSMUSG00000025724	Sequencing	19536157
mirtarbase	mmu-miR-15a-5p	Mtor	56717	ENSMUSG00000028991	Sequencing	19536157
mirtarbase	mmu-miR-15a-5p	Alg2	56737	ENSMUSG00000039740	Sequencing	19536157
mirtarbase	mmu-miR-15a-5p	Mllt11	56772	ENSMUSG00000053192	Sequencing	19536157
mirtarbase	mmu-miR-15a-5p	Brd4	57261	ENSMUSG00000024002	Sequencing	19536157
mirtarbase	mmu-miR-15a-5p	Bcl11b	58208	ENSMUSG00000048251	Sequencing	19536157
mirtarbase	mmu-miR-15a-5p	Stk4	58231	ENSMUSG00000018209	Sequencing	19536157
mirtarbase	mmu-miR-15a-5p	Maea	59003	ENSMUSG00000079562	Sequencing	19536157
mirtarbase	mmu-miR-15a-5p	Slc4a8	59033	ENSMUSG00000023032	Sequencing	19536157
mirtarbase	mmu-miR-15a-5p	Ube4b	63958	ENSMUSG00000028960	Sequencing	19536157
mirtarbase	mmu-miR-15a-5p	Sv2a	64051	ENSMUSG00000038486	Sequencing	19536157
mirtarbase	mmu-miR-15a-5p	Sv2b	64176	ENSMUSG00000053025	Sequencing	19536157
mirtarbase	mmu-miR-15a-5p	Zfp280b	64453	ENSMUSG00000049764	Sequencing	19536157
mirtarbase	mmu-miR-15a-5p	Fopnl	66086	ENSMUSG00000022677	Sequencing	19536157
mirtarbase	mmu-miR-15a-5p	Ufc1	66155	ENSMUSG00000062963	Sequencing	19536157
mirtarbase	mmu-miR-15a-5p	Cdip1	66626	ENSMUSG00000004071	Sequencing	19536157
mirtarbase	mmu-miR-15a-5p	Srp72	66661	ENSMUSG00000036323	Sequencing	19536157
mirtarbase	mmu-miR-15a-5p	4933411K20Rik	66756	ENSMUSG00000031631	Sequencing	19536157
mirtarbase	mmu-miR-15a-5p	Golt1b	66964	ENSMUSG00000030245	Sequencing	19536157
mirtarbase	mmu-miR-15a-5p	Trit1	66966	ENSMUSG00000028653	Sequencing	19536157
mirtarbase	mmu-miR-15a-5p	Yaf2	67057	ENSMUSG00000022634	Sequencing	19536157
mirtarbase	mmu-miR-15a-5p	Ttc14	67120	ENSMUSG00000027677	Sequencing	19536157
mirtarbase	mmu-miR-15a-5p	Cmtm6	67213	ENSMUSG00000032434	Sequencing	19536157
mirtarbase	mmu-miR-15a-5p	1700037H04Rik	67326	ENSMUSG00000027327	Sequencing	19536157
mirtarbase	mmu-miR-15a-5p	Stk35	67333	ENSMUSG00000037885	Sequencing	19536157
mirtarbase	mmu-miR-15a-5p	Armcx2	67416	ENSMUSG00000033436	Sequencing	19536157
mirtarbase	mmu-miR-15a-5p	3632451O06Rik	67419	ENSMUSG00000036242	Sequencing	19536157
mirtarbase	mmu-miR-15a-5p	Mmd	67468	ENSMUSG00000003948	Sequencing	19536157
mirtarbase	mmu-miR-15a-5p	Trim62	67525	ENSMUSG00000041000	Sequencing	19536157
mirtarbase	mmu-miR-15a-5p	Ost4	67695	ENSMUSG00000038803	Sequencing	19536157
mirtarbase	mmu-miR-15a-5p	Slc38a2	67760	ENSMUSG00000022462	Sequencing	19536157
mirtarbase	mmu-miR-15a-5p	Poldip2	67811	ENSMUSG00000001100	Sequencing	19536157
mirtarbase	mmu-miR-15a-5p	Wdr83	67836	ENSMUSG00000005150	Sequencing	19536157
mirtarbase	mmu-miR-15a-5p	Slc35a4	67843	ENSMUSG00000033272	Sequencing	19536157
mirtarbase	mmu-miR-15a-5p	Camsap2	67886	ENSMUSG00000041570	Sequencing	19536157
mirtarbase	mmu-miR-15a-5p	Dynll2	68097	ENSMUSG00000020483	Sequencing	19536157
mirtarbase	mmu-miR-15a-5p	Spire1	68166	ENSMUSG00000024533	Sequencing	19536157
mirtarbase	mmu-miR-15a-5p	Denr	68184	ENSMUSG00000023106	Sequencing	19536157
mirtarbase	mmu-miR-15a-5p	Slc25a22	68267	ENSMUSG00000019082	Sequencing	19536157
mirtarbase	mmu-miR-15a-5p	Rab14	68365	ENSMUSG00000026878	Sequencing	19536157
mirtarbase	mmu-miR-15a-5p	Lmbrd1	68421	ENSMUSG00000073725	Sequencing	19536157
mirtarbase	mmu-miR-15a-5p	Steap3	68428	ENSMUSG00000026389	Sequencing	19536157
mirtarbase	mmu-miR-15a-5p	Tmem109	68539	ENSMUSG00000034659	Sequencing	19536157
mirtarbase	mmu-miR-15a-5p	Trp53inp2	68728	ENSMUSG00000038375	Sequencing	19536157
mirtarbase	mmu-miR-15a-5p	Elovl5	68801	ENSMUSG00000032349	Sequencing	19536157
mirtarbase	mmu-miR-15a-5p	Tulp4	68842	ENSMUSG00000034377	Sequencing	19536157
mirtarbase	mmu-miR-15a-5p	1190002N15Rik	68861	ENSMUSG00000045414	Sequencing	19536157
mirtarbase	mmu-miR-15a-5p	1810013L24Rik	69053	ENSMUSG00000022507	Sequencing	19536157
mirtarbase	mmu-miR-15a-5p	Zfp397	69256	ENSMUSG00000024276	Sequencing	19536157
mirtarbase	mmu-miR-15a-5p	Kctd5	69259	ENSMUSG00000016946	Sequencing	19536157
mirtarbase	mmu-miR-15a-5p	Tsr2	69499	ENSMUSG00000025264	Sequencing	19536157
mirtarbase	mmu-miR-15a-5p	Pcgf3	69587	ENSMUSG00000033623	Sequencing	19536157
mirtarbase	mmu-miR-15a-5p	Lnp	69605	ENSMUSG00000009207	Sequencing	19536157
mirtarbase	mmu-miR-15a-5p	Ube2q1	70093	ENSMUSG00000042572	Sequencing	19536157
mirtarbase	mmu-miR-15a-5p	P2ry12	70839	ENSMUSG00000036353	Sequencing	19536157
mirtarbase	mmu-miR-15a-5p	Ubiad1	71707	ENSMUSG00000047719	Sequencing	19536157
mirtarbase	mmu-miR-15a-5p	Apmap	71881	ENSMUSG00000033096	Sequencing	19536157
mirtarbase	mmu-miR-15a-5p	Zcchc24	71918	ENSMUSG00000055538	Sequencing	19536157
mirtarbase	mmu-miR-15a-5p	Ist1	71955	ENSMUSG00000031729	Sequencing	19536157
mirtarbase	mmu-miR-15a-5p	Cdca4	71963	ENSMUSG00000047832	Sequencing	19536157
mirtarbase	mmu-miR-15a-5p	Fbxl2	72179	ENSMUSG00000032507	Sequencing	19536157
mirtarbase	mmu-miR-15a-5p	Amer1	72345	ENSMUSG00000050332	Sequencing	19536157
mirtarbase	mmu-miR-15a-5p	Reep4	72549	ENSMUSG00000033589	Sequencing	19536157
mirtarbase	mmu-miR-15a-5p	Zfp655	72611	ENSMUSG00000007812	Sequencing	19536157
mirtarbase	mmu-miR-15a-5p	Zfp618	72701	ENSMUSG00000028358	Sequencing	19536157
mirtarbase	mmu-miR-15a-5p	Fam76b	72826	ENSMUSG00000037808	Sequencing	19536157
mirtarbase	mmu-miR-15a-5p	Ccnt2	72949	ENSMUSG00000026349	Luciferase reporter assay	21740905
mirtarbase	mmu-miR-15a-5p	Ccnt2	72949	ENSMUSG00000026349	Sequencing	19536157
mirtarbase	mmu-miR-15a-5p	Ccser2	72972	ENSMUSG00000058690	Sequencing	19536157
mirtarbase	mmu-miR-15a-5p	Golim4	73124	ENSMUSG00000034109	Sequencing	19536157
mirtarbase	mmu-miR-15a-5p	Rhobtb3	73296	ENSMUSG00000021589	Sequencing	19536157
mirtarbase	mmu-miR-15a-5p	Nptxr	73340	ENSMUSG00000022421	Sequencing	19536157
mirtarbase	mmu-miR-15a-5p	Hspa12a	73442	ENSMUSG00000025092	Sequencing	19536157
mirtarbase	mmu-miR-15a-5p	Herc3	73998	ENSMUSG00000029804	Sequencing	19536157
mirtarbase	mmu-miR-15a-5p	Dnm1l	74006	ENSMUSG00000022789	Sequencing	19536157
mirtarbase	mmu-miR-15a-5p	Nfx1	74164	ENSMUSG00000028423	Sequencing	19536157
mirtarbase	mmu-miR-15a-5p	Stk40	74178	ENSMUSG00000042608	Sequencing	19536157
mirtarbase	mmu-miR-15a-5p	Paqr8	74229	ENSMUSG00000025931	Sequencing	19536157
mirtarbase	mmu-miR-15a-5p	Ahcyl2	74340	ENSMUSG00000029772	Sequencing	19536157
mirtarbase	mmu-miR-15a-5p	Lonrf3	74365	ENSMUSG00000016239	Sequencing	19536157
mirtarbase	mmu-miR-15a-5p	Nipal3	74552	ENSMUSG00000028803	Sequencing	19536157
mirtarbase	mmu-miR-15a-5p	Zkscan1	74570	ENSMUSG00000029729	Sequencing	19536157
mirtarbase	mmu-miR-15a-5p	Kbtbd11	74901	ENSMUSG00000055675	Sequencing	19536157
mirtarbase	mmu-miR-15a-5p	Phf14	75725	ENSMUSG00000029629	Sequencing	19536157
mirtarbase	mmu-miR-15a-5p	Senp2	75826	ENSMUSG00000022855	Sequencing	19536157
mirtarbase	mmu-miR-15a-5p	Zdhhc20	75965	ENSMUSG00000021969	Sequencing	19536157
mirtarbase	mmu-miR-15a-5p	Daam2	76441	ENSMUSG00000040260	Sequencing	19536157
mirtarbase	mmu-miR-15a-5p	Efr3a	76740	ENSMUSG00000015002	Sequencing	19536157
mirtarbase	mmu-miR-15a-5p	Tanc2	77097	ENSMUSG00000053580	Sequencing	19536157
mirtarbase	mmu-miR-15a-5p	Klhl2	77113	ENSMUSG00000031605	Sequencing	19536157
mirtarbase	mmu-miR-15a-5p	Sec24a	77371	ENSMUSG00000036391	Sequencing	19536157
mirtarbase	mmu-miR-15a-5p	Heg1	77446	ENSMUSG00000075254	Sequencing	19536157
mirtarbase	mmu-miR-15a-5p	6030458C11Rik	77877	ENSMUSG00000022195	Sequencing	19536157
mirtarbase	mmu-miR-15a-5p	Yipf6	77929	ENSMUSG00000047694	Sequencing	19536157
mirtarbase	mmu-miR-15a-5p	Rictor	78757	ENSMUSG00000050310	Sequencing	19536157
mirtarbase	mmu-miR-15a-5p	Avl9	78937	ENSMUSG00000029787	Sequencing	19536157
mirtarbase	mmu-miR-15a-5p	N4bp1	80750	ENSMUSG00000031652	Sequencing	19536157
mirtarbase	mmu-miR-15a-5p	Sacm1l	83493	ENSMUSG00000025240	Sequencing	19536157
mirtarbase	mmu-miR-15a-5p	Phip	83946	ENSMUSG00000032253	Sequencing	19536157
mirtarbase	mmu-miR-15a-5p	Pi4k2a	84095	ENSMUSG00000025178	Sequencing	19536157
mirtarbase	mmu-miR-15a-5p	Ube2n	93765	ENSMUSG00000074781	Sequencing	19536157
mirtarbase	mmu-miR-15a-5p	Rnf111	93836	ENSMUSG00000032217	Sequencing	19536157
mirtarbase	mmu-miR-15a-5p	B3galt5	93961	ENSMUSG00000074892	Sequencing	19536157
mirtarbase	mmu-miR-15a-5p	Trim33	94093	ENSMUSG00000033014	Sequencing	19536157
mirtarbase	mmu-miR-15a-5p	Lrp1b	94217	ENSMUSG00000049252	Sequencing	19536157
mirtarbase	mmu-miR-15a-5p	Slc24a3	94249	ENSMUSG00000063873	Sequencing	19536157
mirtarbase	mmu-miR-15a-5p	Cadm3	94332	ENSMUSG00000005338	Sequencing	19536157
mirtarbase	mmu-miR-15a-5p	Pid1	98496	ENSMUSG00000045658	Sequencing	19536157
mirtarbase	mmu-miR-15a-5p	Golga2	99412	ENSMUSG00000002546	Sequencing	19536157
mirtarbase	mmu-miR-15a-5p	Lphn2	99633	ENSMUSG00000028184	Sequencing	19536157
mirtarbase	mmu-miR-15a-5p	Camta1	100072	ENSMUSG00000014592	Sequencing	19536157
mirtarbase	mmu-miR-15a-5p	Trrap	100683	ENSMUSG00000045482	Sequencing	19536157
mirtarbase	mmu-miR-15a-5p	Akap9	100986	ENSMUSG00000040407	Sequencing	19536157
mirtarbase	mmu-miR-15a-5p	Mob2	101513	ENSMUSG00000025147	Sequencing	19536157
mirtarbase	mmu-miR-15a-5p	Agpat6	102247	ENSMUSG00000031545	Sequencing	19536157
mirtarbase	mmu-miR-15a-5p	Mapkapk3	102626	ENSMUSG00000032577	Sequencing	19536157
mirtarbase	mmu-miR-15a-5p	Nt5dc3	103466	ENSMUSG00000054027	Sequencing	19536157
mirtarbase	mmu-miR-15a-5p	Psme4	103554	ENSMUSG00000040850	Sequencing	19536157
mirtarbase	mmu-miR-15a-5p	Cdh22	104010	ENSMUSG00000053166	Sequencing	19536157
mirtarbase	mmu-miR-15a-5p	Synj1	104015	ENSMUSG00000022973	Sequencing	19536157
mirtarbase	mmu-miR-15a-5p	Stk38	106504	ENSMUSG00000024006	Sequencing	19536157
mirtarbase	mmu-miR-15a-5p	Vps37c	107305	ENSMUSG00000048832	Sequencing	19536157
mirtarbase	mmu-miR-15a-5p	Baiap2	108100	ENSMUSG00000025372	Sequencing	19536157
mirtarbase	mmu-miR-15a-5p	Sema3d	108151	ENSMUSG00000040254	Sequencing	19536157
mirtarbase	mmu-miR-15a-5p	Rdh13	108841	ENSMUSG00000008435	Sequencing	19536157
mirtarbase	mmu-miR-15a-5p	B3gnt1	108902	ENSMUSG00000047379	Sequencing	19536157
mirtarbase	mmu-miR-15a-5p	Rars2	109093	ENSMUSG00000028292	Sequencing	19536157
mirtarbase	mmu-miR-15a-5p	Fam163b	109349	ENSMUSG00000009216	Sequencing	19536157
mirtarbase	mmu-miR-15a-5p	Ank2	109676	ENSMUSG00000032826	Sequencing	19536157
mirtarbase	mmu-miR-15a-5p	Raf1	110157	ENSMUSG00000000441	Sequencing	19536157
mirtarbase	mmu-miR-15a-5p	Scn2a1	110876	ENSMUSG00000075318	Sequencing	19536157
mirtarbase	mmu-miR-15a-5p	Spred1	114715	ENSMUSG00000027351	Sequencing	19536157
mirtarbase	mmu-miR-15a-5p	Pofut1	140484	ENSMUSG00000046020	Sequencing	19536157
mirtarbase	mmu-miR-15a-5p	Stard4	170459	ENSMUSG00000024378	Sequencing	19536157
mirtarbase	mmu-miR-15a-5p	Hpcal4	170638	ENSMUSG00000046093	Sequencing	19536157
mirtarbase	mmu-miR-15a-5p	Mtmr4	170749	ENSMUSG00000018401	Sequencing	19536157
mirtarbase	mmu-miR-15a-5p	Zfp704	170753	ENSMUSG00000040209	Sequencing	19536157
mirtarbase	mmu-miR-15a-5p	Ppargc1b	170826	ENSMUSG00000033871	Sequencing	19536157
mirtarbase	mmu-miR-15a-5p	Flna	192176	ENSMUSG00000031328	Sequencing	19536157
mirtarbase	mmu-miR-15a-5p	Ash1l	192195	ENSMUSG00000028053	Sequencing	19536157
mirtarbase	mmu-miR-15a-5p	Arhgdia	192662	ENSMUSG00000025132	Sequencing	19536157
mirtarbase	mmu-miR-15a-5p	Fam120c	207375	ENSMUSG00000025262	Sequencing	19536157
mirtarbase	mmu-miR-15a-5p	Shroom4	208431	ENSMUSG00000068270	Sequencing	19536157
mirtarbase	mmu-miR-15a-5p	Rsrc2	208606	ENSMUSG00000029422	Sequencing	19536157
mirtarbase	mmu-miR-15a-5p	Daam1	208846	ENSMUSG00000034574	Sequencing	19536157
mirtarbase	mmu-miR-15a-5p	Snx30	209131	ENSMUSG00000028385	Sequencing	19536157
mirtarbase	mmu-miR-15a-5p	Tmem164	209497	ENSMUSG00000047045	Sequencing	19536157
mirtarbase	mmu-miR-15a-5p	Lcorl	209707	ENSMUSG00000015882	Sequencing	19536157
mirtarbase	mmu-miR-15a-5p	Tmc7	209760	ENSMUSG00000042246	Sequencing	19536157
mirtarbase	mmu-miR-15a-5p	Zfp947	210853	ENSMUSG00000063383	Sequencing	19536157
mirtarbase	mmu-miR-15a-5p	Dennd6a	211922	ENSMUSG00000040818	Sequencing	19536157
mirtarbase	mmu-miR-15a-5p	Syne3	212073	ENSMUSG00000054150	Sequencing	19536157
mirtarbase	mmu-miR-15a-5p	Klhl32	212390	ENSMUSG00000040387	Sequencing	19536157
mirtarbase	mmu-miR-15a-5p	Lcor	212391	ENSMUSG00000025019	Sequencing	19536157
mirtarbase	mmu-miR-15a-5p	Sprn	212518	ENSMUSG00000045733	Sequencing	19536157
mirtarbase	mmu-miR-15a-5p	Map9	213582	ENSMUSG00000033900	Sequencing	19536157
mirtarbase	mmu-miR-15a-5p	9530068E07Rik	213673	ENSMUSG00000036275	Sequencing	19536157
mirtarbase	mmu-miR-15a-5p	Tnrc6b	213988	ENSMUSG00000047888	Sequencing	19536157
mirtarbase	mmu-miR-15a-5p	Ago3	214150	ENSMUSG00000028842	Sequencing	19536157
mirtarbase	mmu-miR-15a-5p	Kmt2a	214162	ENSMUSG00000002028	Sequencing	19536157
mirtarbase	mmu-miR-15a-5p	Fnbp1l	214459	ENSMUSG00000039735	Sequencing	19536157
mirtarbase	mmu-miR-15a-5p	Sema6d	214968	ENSMUSG00000027200	Sequencing	19536157
mirtarbase	mmu-miR-15a-5p	Vezt	215008	ENSMUSG00000036099	Sequencing	19536157
mirtarbase	mmu-miR-15a-5p	Prr14l	215476	ENSMUSG00000054280	Sequencing	19536157
mirtarbase	mmu-miR-15a-5p	Ccdc28a	215814	ENSMUSG00000059554	Sequencing	19536157
mirtarbase	mmu-miR-15a-5p	Usp22	216825	ENSMUSG00000042506	Sequencing	19536157
mirtarbase	mmu-miR-15a-5p	Chd3	216848	ENSMUSG00000018474	Sequencing	19536157
mirtarbase	mmu-miR-15a-5p	Dhx33	216877	ENSMUSG00000040620	Sequencing	19536157
mirtarbase	mmu-miR-15a-5p	Atxn7l3	217218	ENSMUSG00000059995	Sequencing	19536157
mirtarbase	mmu-miR-15a-5p	Cdc27	217232	ENSMUSG00000020687	Sequencing	19536157
mirtarbase	mmu-miR-15a-5p	Dnajc27	217378	ENSMUSG00000020657	Sequencing	19536157
mirtarbase	mmu-miR-15a-5p	Larp4b	217980	ENSMUSG00000033499	Sequencing	19536157
mirtarbase	mmu-miR-15a-5p	Polr3a	218832	ENSMUSG00000025280	Sequencing	19536157
mirtarbase	mmu-miR-15a-5p	Fermt2	218952	ENSMUSG00000037712	Sequencing	19536157
mirtarbase	mmu-miR-15a-5p	Khnyn	219094	ENSMUSG00000047153	Sequencing	19536157
mirtarbase	mmu-miR-15a-5p	Them6	223626	ENSMUSG00000056665	Sequencing	19536157
mirtarbase	mmu-miR-15a-5p	Tmem184b	223693	ENSMUSG00000009035	Sequencing	19536157
mirtarbase	mmu-miR-15a-5p	Mpped1	223726	ENSMUSG00000041708	Sequencing	19536157
mirtarbase	mmu-miR-15a-5p	Spryd3	223918	ENSMUSG00000036966	Sequencing	19536157
mirtarbase	mmu-miR-15a-5p	Klhl22	224023	ENSMUSG00000022750	Sequencing	19536157
mirtarbase	mmu-miR-15a-5p	Crybg3	224273	ENSMUSG00000022723	Sequencing	19536157
mirtarbase	mmu-miR-15a-5p	Reep2	225362	ENSMUSG00000038555	Sequencing	19536157
mirtarbase	mmu-miR-15a-5p	Onecut2	225631	ENSMUSG00000045991	Sequencing	19536157
mirtarbase	mmu-miR-15a-5p	Ablim1	226251	ENSMUSG00000025085	Sequencing	19536157
mirtarbase	mmu-miR-15a-5p	Smg7	226517	ENSMUSG00000042772	Sequencing	19536157
mirtarbase	mmu-miR-15a-5p	Fam78b	226610	ENSMUSG00000060568	Sequencing	19536157
mirtarbase	mmu-miR-15a-5p	Cnst	226744	ENSMUSG00000038949	Sequencing	19536157
mirtarbase	mmu-miR-15a-5p	Dgkd	227333	ENSMUSG00000070738	Sequencing	19536157
mirtarbase	mmu-miR-15a-5p	C1ql3	227580	ENSMUSG00000049630	Sequencing	19536157
mirtarbase	mmu-miR-15a-5p	Zer1	227693	ENSMUSG00000039686	Sequencing	19536157
mirtarbase	mmu-miR-15a-5p	Dennd1a	227801	ENSMUSG00000035392	Sequencing	19536157
mirtarbase	mmu-miR-15a-5p	Gtdc1	227835	ENSMUSG00000036890	Sequencing	19536157
mirtarbase	mmu-miR-15a-5p	Ppig	228005	ENSMUSG00000042133	Sequencing	19536157
mirtarbase	mmu-miR-15a-5p	4930402H24Rik	228602	ENSMUSG00000027309	Sequencing	19536157
mirtarbase	mmu-miR-15a-5p	Csrp2bp	228714	ENSMUSG00000027425	Sequencing	19536157
mirtarbase	mmu-miR-15a-5p	Ralgapb	228850	ENSMUSG00000027652	Sequencing	19536157
mirtarbase	mmu-miR-15a-5p	Zbtb10	229055	ENSMUSG00000069114	Sequencing	19536157
mirtarbase	mmu-miR-15a-5p	Rsbn1	229675	ENSMUSG00000044098	Sequencing	19536157
mirtarbase	mmu-miR-15a-5p	Ahcyl1	229709	ENSMUSG00000027893	Sequencing	19536157
mirtarbase	mmu-miR-15a-5p	Olfm3	229759	ENSMUSG00000027965	Sequencing	19536157
mirtarbase	mmu-miR-15a-5p	Rap1gds1	229877	ENSMUSG00000028149	Sequencing	19536157
mirtarbase	mmu-miR-15a-5p	Gba2	230101	ENSMUSG00000028467	Sequencing	19536157
mirtarbase	mmu-miR-15a-5p	Zbtb5	230119	ENSMUSG00000049657	Sequencing	19536157
mirtarbase	mmu-miR-15a-5p	Megf9	230316	ENSMUSG00000039270	Sequencing	19536157
mirtarbase	mmu-miR-15a-5p	Wdtc1	230796	ENSMUSG00000037622	Sequencing	19536157
mirtarbase	mmu-miR-15a-5p	Kmt2c	231051	ENSMUSG00000038056	Sequencing	19536157
mirtarbase	mmu-miR-15a-5p	Cpeb2	231207	ENSMUSG00000039782	Sequencing	19536157
mirtarbase	mmu-miR-15a-5p	Sel1l3	231238	ENSMUSG00000029189	Sequencing	19536157
mirtarbase	mmu-miR-15a-5p	Guf1	231279	ENSMUSG00000029208	Sequencing	19536157
mirtarbase	mmu-miR-15a-5p	Fbxo21	231670	ENSMUSG00000032898	Sequencing	19536157
mirtarbase	mmu-miR-15a-5p	Rad9b	231724	ENSMUSG00000038569	Sequencing	19536157
mirtarbase	mmu-miR-15a-5p	Mepce	231803	ENSMUSG00000029726	Sequencing	19536157
mirtarbase	mmu-miR-15a-5p	Creb5	231991	ENSMUSG00000053007	Sequencing	19536157
mirtarbase	mmu-miR-15a-5p	Crebl2	232430	ENSMUSG00000032652	Sequencing	19536157
mirtarbase	mmu-miR-15a-5p	Ppp1r12c	232807	ENSMUSG00000019254	Sequencing	19536157
mirtarbase	mmu-miR-15a-5p	Fbxo27	233040	ENSMUSG00000037463	Sequencing	19536157
mirtarbase	mmu-miR-15a-5p	Rnf40	233900	ENSMUSG00000030816	Sequencing	19536157
mirtarbase	mmu-miR-15a-5p	Colgalt1	234407	ENSMUSG00000034807	Sequencing	19536157
mirtarbase	mmu-miR-15a-5p	Heatr3	234549	ENSMUSG00000031657	Sequencing	19536157
mirtarbase	mmu-miR-15a-5p	Cnot1	234594	ENSMUSG00000036550	Sequencing	19536157
mirtarbase	mmu-miR-15a-5p	Slc38a7	234595	ENSMUSG00000036534	Sequencing	19536157
mirtarbase	mmu-miR-15a-5p	Kank2	235041	ENSMUSG00000032194	Sequencing	19536157
mirtarbase	mmu-miR-15a-5p	Ntm	235106	ENSMUSG00000059974	Sequencing	19536157
mirtarbase	mmu-miR-15a-5p	Rnf214	235315	ENSMUSG00000042790	Sequencing	19536157
mirtarbase	mmu-miR-15a-5p	Plscr4	235527	ENSMUSG00000032377	Sequencing	19536157
mirtarbase	mmu-miR-15a-5p	Cdk17	237459	ENSMUSG00000020015	Sequencing	19536157
mirtarbase	mmu-miR-15a-5p	Osbpl8	237542	ENSMUSG00000020189	Sequencing	19536157
mirtarbase	mmu-miR-15a-5p	Foxred2	239554	ENSMUSG00000016552	Sequencing	19536157
mirtarbase	mmu-miR-15a-5p	Fsd1	240121	ENSMUSG00000011589	Sequencing	19536157
mirtarbase	mmu-miR-15a-5p	D430041D05Rik	241589	ENSMUSG00000068373	Sequencing	19536157
mirtarbase	mmu-miR-15a-5p	Lzts3	241638	ENSMUSG00000037703	Sequencing	19536157
mirtarbase	mmu-miR-15a-5p	Slc7a14	241919	ENSMUSG00000069072	Sequencing	19536157
mirtarbase	mmu-miR-15a-5p	Tmem245	242474	ENSMUSG00000055296	Sequencing	19536157
mirtarbase	mmu-miR-15a-5p	Rims3	242662	ENSMUSG00000032890	Sequencing	19536157
mirtarbase	mmu-miR-15a-5p	Slc6a11	243616	ENSMUSG00000030307	Sequencing	19536157
mirtarbase	mmu-miR-15a-5p	Fkrp	243853	ENSMUSG00000048920	Sequencing	19536157
mirtarbase	mmu-miR-15a-5p	Myo16	244281	ENSMUSG00000039057	Sequencing	19536157
mirtarbase	mmu-miR-15a-5p	Mtss1l	244654	ENSMUSG00000033763	Sequencing	19536157
mirtarbase	mmu-miR-15a-5p	C77370	245555	ENSMUSG00000046449	Sequencing	19536157
mirtarbase	mmu-miR-15a-5p	Atg9a	245860	ENSMUSG00000033124	Sequencing	19536157
mirtarbase	mmu-miR-15a-5p	Wasf3	245880	ENSMUSG00000029636	Sequencing	19536157
mirtarbase	mmu-miR-15a-5p	Tpcn1	252972	ENSMUSG00000032741	Sequencing	19536157
mirtarbase	mmu-miR-15a-5p	Sh3pxd2b	268396	ENSMUSG00000040711	Sequencing	19536157
mirtarbase	mmu-miR-15a-5p	Ankrd13b	268445	ENSMUSG00000037907	Sequencing	19536157
mirtarbase	mmu-miR-15a-5p	Sptlc1	268656	ENSMUSG00000021468	Sequencing	19536157
mirtarbase	mmu-miR-15a-5p	Fam107a	268709	ENSMUSG00000021750	Sequencing	19536157
mirtarbase	mmu-miR-15a-5p	Strn	268980	ENSMUSG00000024077	Sequencing	19536157
mirtarbase	mmu-miR-15a-5p	Fam171a1	269233	ENSMUSG00000050530	Sequencing	19536157
mirtarbase	mmu-miR-15a-5p	Gtf3c4	269252	ENSMUSG00000035666	Sequencing	19536157
mirtarbase	mmu-miR-15a-5p	Lrig2	269473	ENSMUSG00000032913	Sequencing	19536157
mirtarbase	mmu-miR-15a-5p	Zfp664	269704	ENSMUSG00000079215	Sequencing	19536157
mirtarbase	mmu-miR-15a-5p	Elmod1	270162	ENSMUSG00000041986	Sequencing	19536157
mirtarbase	mmu-miR-15a-5p	Pfkfb4	270198	ENSMUSG00000025648	Sequencing	19536157
mirtarbase	mmu-miR-15a-5p	Klhl18	270201	ENSMUSG00000054792	Sequencing	19536157
mirtarbase	mmu-miR-15a-5p	Tarsl2	272396	ENSMUSG00000030515	Sequencing	19536157
mirtarbase	mmu-miR-15a-5p	Klhl23	277396	ENSMUSG00000042155	Sequencing	19536157
mirtarbase	mmu-miR-15a-5p	Gpr107	277463	ENSMUSG00000000194	Sequencing	19536157
mirtarbase	mmu-miR-15a-5p	Slc9a5	277973	ENSMUSG00000014786	Sequencing	19536157
mirtarbase	mmu-miR-15a-5p	Tmtc2	278279	ENSMUSG00000036019	Sequencing	19536157
mirtarbase	mmu-miR-15a-5p	Fchsd1	319262	ENSMUSG00000038524	Sequencing	19536157
mirtarbase	mmu-miR-15a-5p	Rab9b	319642	ENSMUSG00000043463	Sequencing	19536157
mirtarbase	mmu-miR-15a-5p	Smyd4	319822	ENSMUSG00000018809	Sequencing	19536157
mirtarbase	mmu-miR-15a-5p	Sidt1	320007	ENSMUSG00000022696	Sequencing	19536157
mirtarbase	mmu-miR-15a-5p	Nceh1	320024	ENSMUSG00000027698	Sequencing	19536157
mirtarbase	mmu-miR-15a-5p	Tacc1	320165	ENSMUSG00000065954	Sequencing	19536157
mirtarbase	mmu-miR-15a-5p	Rasgef1b	320292	ENSMUSG00000029333	Sequencing	19536157
mirtarbase	mmu-miR-15a-5p	Vps13c	320528	ENSMUSG00000035284	Sequencing	19536157
mirtarbase	mmu-miR-15a-5p	Slc35e2	320541	ENSMUSG00000042202	Sequencing	19536157
mirtarbase	mmu-miR-15a-5p	Soga1	320706	ENSMUSG00000055485	Sequencing	19536157
mirtarbase	mmu-miR-15a-5p	Itgb8	320910	ENSMUSG00000025321	Sequencing	19536157
mirtarbase	mmu-miR-15a-5p	Slc39a9	328133	ENSMUSG00000048833	Sequencing	19536157
mirtarbase	mmu-miR-15a-5p	Fam163a	329274	ENSMUSG00000015484	Sequencing	19536157
mirtarbase	mmu-miR-15a-5p	8430427H17Rik	329540	ENSMUSG00000061411	Sequencing	19536157
mirtarbase	mmu-miR-15a-5p	Pcdha1	353236	ENSMUSG00000007440	Sequencing	19536157
mirtarbase	mmu-miR-15a-5p	Pcdha10	353236	ENSMUSG00000007440	Sequencing	19536157
mirtarbase	mmu-miR-15a-5p	Pcdha11	353236	ENSMUSG00000007440	Sequencing	19536157
mirtarbase	mmu-miR-15a-5p	Pcdha12	353236	ENSMUSG00000007440	Sequencing	19536157
mirtarbase	mmu-miR-15a-5p	Pcdha2	353236	ENSMUSG00000007440	Sequencing	19536157
mirtarbase	mmu-miR-15a-5p	Pcdha4	353236	ENSMUSG00000007440	Sequencing	19536157
mirtarbase	mmu-miR-15a-5p	Pcdha5	353236	ENSMUSG00000007440	Sequencing	19536157
mirtarbase	mmu-miR-15a-5p	Pcdhac1	353236	ENSMUSG00000007440	Sequencing	19536157
mirtarbase	mmu-miR-15a-5p	Pcdhac2	353236	ENSMUSG00000007440	Sequencing	19536157
mirtarbase	mmu-miR-15a-5p	Pcdha9	353236	ENSMUSG00000007440	Sequencing	19536157
mirtarbase	mmu-miR-15a-5p	Ccnjl	380694	ENSMUSG00000044707	Sequencing	19536157
mirtarbase	mmu-miR-15a-5p	Shisa6	380702	ENSMUSG00000053930	Sequencing	19536157
mirtarbase	mmu-miR-15a-5p	Scn4b	399548	ENSMUSG00000046480	Sequencing	19536157
mirtarbase	mmu-miR-15a-5p	Znrf3	407821	ENSMUSG00000041961	Sequencing	19536157
mirtarbase	mmu-miR-15a-5p	Zyg11b	414872	ENSMUSG00000034636	Sequencing	19536157
mirtarbase	mmu-miR-15a-5p	Gnptab	432486	ENSMUSG00000035311	Sequencing	19536157
mirtarbase	mmu-miR-15a-5p	Syndig1	433485	ENSMUSG00000074736	Sequencing	19536157
mirtarbase	mmu-miR-15a-5p	Tmem178b	434008	ENSMUSG00000057716	Sequencing	19536157
mirtarbase	mmu-miR-15a-5p	Tmem28	620592	ENSMUSG00000071719	Sequencing	19536157
mirtarbase	mmu-miR-15a-5p	Zfp827	622675	ENSMUSG00000071064	Sequencing	19536157
mirtarbase	mmu-miR-15a-5p	Frmpd1	666060	ENSMUSG00000035615	Sequencing	19536157
mirtarbase	mmu-miR-15a-5p	Prdm11	100042784	ENSMUSG00000075028	Sequencing	19536157
mirtarbase	mmu-miR-15a-5p	Atg14	100504663	ENSMUSG00000037526	Sequencing	19536157
tarbase	mmu-miR-15a-5p	0610037P05Rik		ENSMUSG00000022677	Sequencing
tarbase	mmu-miR-15a-5p	1190002N15Rik	68861	ENSMUSG00000045414	Sequencing
tarbase	mmu-miR-15a-5p	1500041N16Rik		ENSMUSG00000005150	Sequencing
tarbase	mmu-miR-15a-5p	1700037H04Rik	67326	ENSMUSG00000027327	Sequencing
tarbase	mmu-miR-15a-5p	1810013L24Rik	69053	ENSMUSG00000022507	Sequencing
tarbase	mmu-miR-15a-5p	2310001A20Rik		ENSMUSG00000033096	Sequencing
tarbase	mmu-miR-15a-5p	2310016E02Rik		ENSMUSG00000038803	Sequencing
tarbase	mmu-miR-15a-5p	2310045A20Rik		ENSMUSG00000029189	Sequencing
tarbase	mmu-miR-15a-5p	2400003C14Rik		ENSMUSG00000031729	Sequencing
tarbase	mmu-miR-15a-5p	2700078K21Rik		ENSMUSG00000025147	Sequencing
tarbase	mmu-miR-15a-5p	3632451O06Rik	67419	ENSMUSG00000036242	Sequencing
tarbase	mmu-miR-15a-5p	4831426I19Rik		ENSMUSG00000054150	Sequencing
tarbase	mmu-miR-15a-5p	4921505C17Rik		ENSMUSG00000050310	Sequencing
tarbase	mmu-miR-15a-5p	4930402H24Rik	228602	ENSMUSG00000027309	Sequencing
tarbase	mmu-miR-15a-5p	4930572J05Rik		ENSMUSG00000056665	Sequencing
tarbase	mmu-miR-15a-5p	4933411K20Rik	66756	ENSMUSG00000031631	Sequencing
tarbase	mmu-miR-15a-5p	5730403B10Rik		ENSMUSG00000004071	Sequencing
tarbase	mmu-miR-15a-5p	6030436E02Rik		ENSMUSG00000054280	Sequencing
tarbase	mmu-miR-15a-5p	6030458C11Rik	77877	ENSMUSG00000022195	Sequencing
tarbase	mmu-miR-15a-5p	8430427H17Rik	329540	ENSMUSG00000061411	Sequencing
tarbase	mmu-miR-15a-5p	9130227C08Rik		ENSMUSG00000047153	Sequencing
tarbase	mmu-miR-15a-5p	9430076C15Rik		ENSMUSG00000053007	Sequencing
tarbase	mmu-miR-15a-5p	9530068E07Rik	213673	ENSMUSG00000036275	Sequencing
tarbase	mmu-miR-15a-5p	9630058J23Rik		ENSMUSG00000038949	Sequencing
tarbase	mmu-miR-15a-5p	9830001H06Rik		ENSMUSG00000055485	Sequencing
tarbase	mmu-miR-15a-5p	A530082C11Rik		ENSMUSG00000042202	Sequencing
tarbase	mmu-miR-15a-5p	Aadacl1		ENSMUSG00000027698	Sequencing
tarbase	mmu-miR-15a-5p	Abcd4	19300	ENSMUSG00000021240	Sequencing
tarbase	mmu-miR-15a-5p	Ablim1	226251	ENSMUSG00000025085	Sequencing
tarbase	mmu-miR-15a-5p	AC131065.16		ENSMUSG00000024571	Sequencing
tarbase	mmu-miR-15a-5p	AC154759.2-3		ENSMUSG00000055538	Sequencing
tarbase	mmu-miR-15a-5p	AC191933.3		ENSMUSG00000069849	Sequencing
tarbase	mmu-miR-15a-5p	Acsl1	14081	ENSMUSG00000018796	Sequencing
tarbase	mmu-miR-15a-5p	Adam10	11487	ENSMUSG00000054693	Sequencing
tarbase	mmu-miR-15a-5p	Adam19	11492	ENSMUSG00000011256	Sequencing
tarbase	mmu-miR-15a-5p	Aebp2	11569	ENSMUSG00000030232	Sequencing
tarbase	mmu-miR-15a-5p	Agpat6	102247	ENSMUSG00000031545	Sequencing
tarbase	mmu-miR-15a-5p	Ahcyl1	229709	ENSMUSG00000027893	Sequencing
tarbase	mmu-miR-15a-5p	Ahcyl2	74340	ENSMUSG00000029772	Sequencing
tarbase	mmu-miR-15a-5p	Ahi1	52906	ENSMUSG00000019986	Sequencing
tarbase	mmu-miR-15a-5p	Ak3l1		ENSMUSG00000028527	Sequencing
tarbase	mmu-miR-15a-5p	Akap9	100986	ENSMUSG00000040407	Sequencing
tarbase	mmu-miR-15a-5p	AL606904.12-1		ENSMUSG00000078237	Sequencing
tarbase	mmu-miR-15a-5p	AL645623.13		ENSMUSG00000072593	Sequencing
tarbase	mmu-miR-15a-5p	AL833805.11-2		ENSMUSG00000060628	Sequencing
tarbase	mmu-miR-15a-5p	Aldoa	11674	ENSMUSG00000030695	Sequencing
tarbase	mmu-miR-15a-5p	Alg2	56737	ENSMUSG00000039740	Sequencing
tarbase	mmu-miR-15a-5p	Amfr	23802	ENSMUSG00000031751	Sequencing
tarbase	mmu-miR-15a-5p	Amotl2	56332	ENSMUSG00000032531	Sequencing
tarbase	mmu-miR-15a-5p	Angpt1	11600	ENSMUSG00000022309	Sequencing
tarbase	mmu-miR-15a-5p	Ank2	109676	ENSMUSG00000032826	Sequencing
tarbase	mmu-miR-15a-5p	Ank3	11735	ENSMUSG00000069601	Sequencing
tarbase	mmu-miR-15a-5p	Ankrd13b	268445	ENSMUSG00000037907	Sequencing
tarbase	mmu-miR-15a-5p	Ap3d1	11776	ENSMUSG00000020198	Sequencing
tarbase	mmu-miR-15a-5p	Apln	30878	ENSMUSG00000037010	Sequencing
tarbase	mmu-miR-15a-5p	Aplp2	11804	ENSMUSG00000031996	Sequencing
tarbase	mmu-miR-15a-5p	App	11820	ENSMUSG00000022892	Sequencing
tarbase	mmu-miR-15a-5p	Arhgdia	192662	ENSMUSG00000025132	Sequencing
tarbase	mmu-miR-15a-5p	Armcx2	67416	ENSMUSG00000033436	Sequencing
tarbase	mmu-miR-15a-5p	Ash1l	192195	ENSMUSG00000028053	Sequencing
tarbase	mmu-miR-15a-5p	Atg9a	245860	ENSMUSG00000033124	Sequencing
tarbase	mmu-miR-15a-5p	Atp2a2	11938	ENSMUSG00000029467	Sequencing
tarbase	mmu-miR-15a-5p	Atp7a	11977	ENSMUSG00000033792	Sequencing
tarbase	mmu-miR-15a-5p	Atp9b	50771	ENSMUSG00000024566	Sequencing
tarbase	mmu-miR-15a-5p	Atrn	11990	ENSMUSG00000027312	Sequencing
tarbase	mmu-miR-15a-5p	Atxn7l3	217218	ENSMUSG00000059995	Sequencing
tarbase	mmu-miR-15a-5p	Avl9	78937	ENSMUSG00000029787	Sequencing
tarbase	mmu-miR-15a-5p	B230339M05Rik		ENSMUSG00000027652	Sequencing
tarbase	mmu-miR-15a-5p	B3galt5	93961	ENSMUSG00000074892	Sequencing
tarbase	mmu-miR-15a-5p	B3gnt1	108902	ENSMUSG00000047379	Sequencing
tarbase	mmu-miR-15a-5p	B4galt6	56386	ENSMUSG00000056124	Sequencing
tarbase	mmu-miR-15a-5p	Baiap2	108100	ENSMUSG00000025372	Sequencing
tarbase	mmu-miR-15a-5p	BC060632		ENSMUSG00000033763	Sequencing
tarbase	mmu-miR-15a-5p	Bcl11b	58208	ENSMUSG00000048251	Sequencing
tarbase	mmu-miR-15a-5p	bcl-2			Reporter assay//qRT-PCR//Western blot
tarbase	mmu-miR-15a-5p	bcl-xl			Western blot
tarbase	mmu-miR-15a-5p	Bicd1	12121	ENSMUSG00000003452	Sequencing
tarbase	mmu-miR-15a-5p	Bmpr1a	12166	ENSMUSG00000021796	Sequencing
tarbase	mmu-miR-15a-5p	Brd4	57261	ENSMUSG00000024002	Sequencing
tarbase	mmu-miR-15a-5p	Brms1l	52592	ENSMUSG00000012076	Sequencing
tarbase	mmu-miR-15a-5p	Btrc	12234	ENSMUSG00000025217	Sequencing
tarbase	mmu-miR-15a-5p	C030014K22Rik		ENSMUSG00000060568	Sequencing
tarbase	mmu-miR-15a-5p	C1ql3	227580	ENSMUSG00000049630	Sequencing
tarbase	mmu-miR-15a-5p	C77370	245555	ENSMUSG00000046449	Sequencing
tarbase	mmu-miR-15a-5p	Cacnb2	12296	ENSMUSG00000057914	Sequencing
tarbase	mmu-miR-15a-5p	Cadm1	54725	ENSMUSG00000032076	Reporter assay//Sequencing
tarbase	mmu-miR-15a-5p	Cadm3	94332	ENSMUSG00000005338	Sequencing
tarbase	mmu-miR-15a-5p	Cadps	27062	ENSMUSG00000054423	Sequencing
tarbase	mmu-miR-15a-5p	Camsap1l1		ENSMUSG00000041570	Sequencing
tarbase	mmu-miR-15a-5p	Camta1	100072	ENSMUSG00000014592	Sequencing
tarbase	mmu-miR-15a-5p	Capza2	12343	ENSMUSG00000015733	Sequencing
tarbase	mmu-miR-15a-5p	Cask	12361	ENSMUSG00000031012	Sequencing
tarbase	mmu-miR-15a-5p	Cbfa2t2	12396	ENSMUSG00000038533	Sequencing
tarbase	mmu-miR-15a-5p	Cbfa2t3	12398	ENSMUSG00000006362	Sequencing
tarbase	mmu-miR-15a-5p	Cbln1	12404	ENSMUSG00000031654	Sequencing
tarbase	mmu-miR-15a-5p	Cbx4	12418	ENSMUSG00000039989	Sequencing
tarbase	mmu-miR-15a-5p	Ccdc28a	215814	ENSMUSG00000059554	Sequencing
tarbase	mmu-miR-15a-5p	Ccnd1	12443	ENSMUSG00000070348	Sequencing
tarbase	mmu-miR-15a-5p	Ccnjl	380694	ENSMUSG00000044707	Sequencing
tarbase	mmu-miR-15a-5p	Ccnt2	72949	ENSMUSG00000026349	Sequencing
tarbase	mmu-miR-15a-5p	Cdc27	217232	ENSMUSG00000020687	Sequencing
tarbase	mmu-miR-15a-5p	Cdca4	71963	ENSMUSG00000047832	Sequencing
tarbase	mmu-miR-15a-5p	Cdh22	104010	ENSMUSG00000053166	Sequencing
tarbase	mmu-miR-15a-5p	Chd3	216848	ENSMUSG00000018474	Sequencing
tarbase	mmu-miR-15a-5p	Chka	12660	ENSMUSG00000024843	Sequencing
tarbase	mmu-miR-15a-5p	Clk1	12747	ENSMUSG00000026034	Sequencing
tarbase	mmu-miR-15a-5p	Clock	12753	ENSMUSG00000029238	Sequencing
tarbase	mmu-miR-15a-5p	Clu	12759	ENSMUSG00000022037	Sequencing
tarbase	mmu-miR-15a-5p	Cmtm6	67213	ENSMUSG00000032434	Sequencing
tarbase	mmu-miR-15a-5p	Cnot1	234594	ENSMUSG00000036550	Sequencing
tarbase	mmu-miR-15a-5p	Cnot1	620499	ENSMUSG00000036550	Sequencing
tarbase	mmu-miR-15a-5p	Cntnap1	53321	ENSMUSG00000017167	Sequencing
tarbase	mmu-miR-15a-5p	Col4a1	12826	ENSMUSG00000031502	Sequencing
tarbase	mmu-miR-15a-5p	Cops2	12848	ENSMUSG00000027206	Sequencing
tarbase	mmu-miR-15a-5p	Cpeb2	231207	ENSMUSG00000039782	Sequencing
tarbase	mmu-miR-15a-5p	Crebl2	232430	ENSMUSG00000032652	Sequencing
tarbase	mmu-miR-15a-5p	Crybg3	224273	ENSMUSG00000022723	Sequencing
tarbase	mmu-miR-15a-5p	Csrp2bp	228714	ENSMUSG00000027425	Sequencing
tarbase	mmu-miR-15a-5p	Ctdsp2	52468	ENSMUSG00000078429	Sequencing
tarbase	mmu-miR-15a-5p	Cx3cl1	20312	ENSMUSG00000031778	Sequencing
tarbase	mmu-miR-15a-5p	Cxcl12	20315	ENSMUSG00000061353	Sequencing
tarbase	mmu-miR-15a-5p	D14Ertd436e		ENSMUSG00000037526	Sequencing
tarbase	mmu-miR-15a-5p	D230039L06Rik		ENSMUSG00000054274	Sequencing
tarbase	mmu-miR-15a-5p	D430041D05Rik	241589	ENSMUSG00000068373	Sequencing
tarbase	mmu-miR-15a-5p	D730040F13Rik		ENSMUSG00000055296	Sequencing
tarbase	mmu-miR-15a-5p	Daam1	208846	ENSMUSG00000034574	Sequencing
tarbase	mmu-miR-15a-5p	Daam2	76441	ENSMUSG00000040260	Sequencing
tarbase	mmu-miR-15a-5p	Dcc	13176	ENSMUSG00000060534	Sequencing
tarbase	mmu-miR-15a-5p	Dclk1	13175	ENSMUSG00000027797	Sequencing
tarbase	mmu-miR-15a-5p	Ddx5	13207	ENSMUSG00000020719	Sequencing
tarbase	mmu-miR-15a-5p	Dedd	21945	ENSMUSG00000013973	Sequencing
tarbase	mmu-miR-15a-5p	Dennd1a	227801	ENSMUSG00000035392	Sequencing
tarbase	mmu-miR-15a-5p	Denr	68184	ENSMUSG00000023106	Sequencing
tarbase	mmu-miR-15a-5p	Dgkd	227333	ENSMUSG00000070738	Sequencing
tarbase	mmu-miR-15a-5p	Dhx33	216877	ENSMUSG00000040620	Sequencing
tarbase	mmu-miR-15a-5p	Dlc1	50768	ENSMUSG00000031523	Sequencing
tarbase	mmu-miR-15a-5p	Dll4	54485	ENSMUSG00000027314	Sequencing
tarbase	mmu-miR-15a-5p	Dnajc27	217378	ENSMUSG00000020657	Sequencing
tarbase	mmu-miR-15a-5p	Dnm1l	74006	ENSMUSG00000022789	Sequencing
tarbase	mmu-miR-15a-5p	Dync1i1	13426	ENSMUSG00000029757	Sequencing
tarbase	mmu-miR-15a-5p	Dynll2	68097	ENSMUSG00000020483	Sequencing
tarbase	mmu-miR-15a-5p	Dyrk1a	13548	ENSMUSG00000022897	Sequencing
tarbase	mmu-miR-15a-5p	E2f3	13557	ENSMUSG00000016477	Sequencing
tarbase	mmu-miR-15a-5p	Ednrb	13618	ENSMUSG00000022122	Sequencing
tarbase	mmu-miR-15a-5p	Efna2	13637	ENSMUSG00000003070	Sequencing
tarbase	mmu-miR-15a-5p	Efr3a	76740	ENSMUSG00000015002	Sequencing
tarbase	mmu-miR-15a-5p	EG210853		ENSMUSG00000063383	Sequencing
tarbase	mmu-miR-15a-5p	EG434008		ENSMUSG00000057716	Sequencing
tarbase	mmu-miR-15a-5p	Eif2c3		ENSMUSG00000028842	Sequencing
tarbase	mmu-miR-15a-5p	Elmod1	270162	ENSMUSG00000041986	Sequencing
tarbase	mmu-miR-15a-5p	Elovl5	68801	ENSMUSG00000032349	Sequencing
tarbase	mmu-miR-15a-5p	En2	13799	ENSMUSG00000039095	Sequencing
tarbase	mmu-miR-15a-5p	Entpd5	12499	ENSMUSG00000021236	Sequencing
tarbase	mmu-miR-15a-5p	Etv3	27049	ENSMUSG00000003382	Sequencing
tarbase	mmu-miR-15a-5p	Exoc7	53413	ENSMUSG00000020792	Sequencing
tarbase	mmu-miR-15a-5p	Ext1	14042	ENSMUSG00000061731	Sequencing
tarbase	mmu-miR-15a-5p	Extl3	54616	ENSMUSG00000021978	Sequencing
tarbase	mmu-miR-15a-5p	Fam107a	268709	ENSMUSG00000021750	Sequencing
tarbase	mmu-miR-15a-5p	Fam116a		ENSMUSG00000040818	Sequencing
tarbase	mmu-miR-15a-5p	Fam120c	207375	ENSMUSG00000025262	Sequencing
tarbase	mmu-miR-15a-5p	Fam123b		ENSMUSG00000050332	Sequencing
tarbase	mmu-miR-15a-5p	Fam163a	329274	ENSMUSG00000015484	Sequencing
tarbase	mmu-miR-15a-5p	Fam163b	109349	ENSMUSG00000009216	Sequencing
tarbase	mmu-miR-15a-5p	Fam171a1	269233	ENSMUSG00000050530	Sequencing
tarbase	mmu-miR-15a-5p	Fam76b	72826	ENSMUSG00000037808	Sequencing
tarbase	mmu-miR-15a-5p	Fasn	14104	ENSMUSG00000025153	Sequencing
tarbase	mmu-miR-15a-5p	Fbxl2	72179	ENSMUSG00000032507	Sequencing
tarbase	mmu-miR-15a-5p	Fbxo21	231670	ENSMUSG00000032898	Sequencing
tarbase	mmu-miR-15a-5p	Fbxo27	233040	ENSMUSG00000037463	Sequencing
tarbase	mmu-miR-15a-5p	Fchsd1	319262	ENSMUSG00000038524	Sequencing
tarbase	mmu-miR-15a-5p	Fermt2	218952	ENSMUSG00000037712	Sequencing
tarbase	mmu-miR-15a-5p	Fkrp	243853	ENSMUSG00000048920	Sequencing
tarbase	mmu-miR-15a-5p	Flna	192176	ENSMUSG00000031328	Sequencing
tarbase	mmu-miR-15a-5p	Flot2	14252	ENSMUSG00000061981	Sequencing
tarbase	mmu-miR-15a-5p	Fnbp1	14269	ENSMUSG00000075415	Sequencing
tarbase	mmu-miR-15a-5p	Fnbp1l	214459	ENSMUSG00000039735	Sequencing
tarbase	mmu-miR-15a-5p	Foxk1	17425	ENSMUSG00000056493	Sequencing
tarbase	mmu-miR-15a-5p	Foxred2	239554	ENSMUSG00000016552	Sequencing
tarbase	mmu-miR-15a-5p	Frap1		ENSMUSG00000028991	Sequencing
tarbase	mmu-miR-15a-5p	Frmpd1	666060	ENSMUSG00000035615	Sequencing
tarbase	mmu-miR-15a-5p	Fsd1	240121	ENSMUSG00000011589	Sequencing
tarbase	mmu-miR-15a-5p	Fstl1	14314	ENSMUSG00000022816	Sequencing
tarbase	mmu-miR-15a-5p	Fut9	14348	ENSMUSG00000055373	Sequencing
tarbase	mmu-miR-15a-5p	Gabpa	14390	ENSMUSG00000008976	Sequencing
tarbase	mmu-miR-15a-5p	Gabra1	14394	ENSMUSG00000010803	Sequencing
tarbase	mmu-miR-15a-5p	Gba2	230101	ENSMUSG00000028467	Sequencing
tarbase	mmu-miR-15a-5p	Gcap14		ENSMUSG00000058690	Sequencing
tarbase	mmu-miR-15a-5p	Git2	26431	ENSMUSG00000041890	Sequencing
tarbase	mmu-miR-15a-5p	Glrp1	14659	ENSMUSG00000062310	Sequencing
tarbase	mmu-miR-15a-5p	Glt25d1		ENSMUSG00000034807	Sequencing
tarbase	mmu-miR-15a-5p	Glud1	14661	ENSMUSG00000021794	Sequencing
tarbase	mmu-miR-15a-5p	Gm879		ENSMUSG00000053930	Sequencing
tarbase	mmu-miR-15a-5p	Gnal	14680	ENSMUSG00000024524	Sequencing
tarbase	mmu-miR-15a-5p	Gnaq	14682	ENSMUSG00000024639	Sequencing
tarbase	mmu-miR-15a-5p	Gnas	14683	ENSMUSG00000027523	Sequencing
tarbase	mmu-miR-15a-5p	Gne	50798	ENSMUSG00000028479	Sequencing
tarbase	mmu-miR-15a-5p	Gnptab	432486	ENSMUSG00000035311	Sequencing
tarbase	mmu-miR-15a-5p	Golga2	99412	ENSMUSG00000002546	Sequencing
tarbase	mmu-miR-15a-5p	Golim4	73124	ENSMUSG00000034109	Sequencing
tarbase	mmu-miR-15a-5p	Golt1b	66964	ENSMUSG00000030245	Sequencing
tarbase	mmu-miR-15a-5p	Gpr107	277463	ENSMUSG00000000194	Sequencing
tarbase	mmu-miR-15a-5p	Gpr123	52389	ENSMUSG00000025475	Sequencing
tarbase	mmu-miR-15a-5p	Grem2	23893	ENSMUSG00000050069	Sequencing
tarbase	mmu-miR-15a-5p	Grin1	14810	ENSMUSG00000026959	Sequencing
tarbase	mmu-miR-15a-5p	Grinl1a		ENSMUSG00000032199	Sequencing
tarbase	mmu-miR-15a-5p	Gtdc1	227835	ENSMUSG00000036890	Sequencing
tarbase	mmu-miR-15a-5p	Gtf3c4	269252	ENSMUSG00000035666	Sequencing
tarbase	mmu-miR-15a-5p	Gtlf3b		ENSMUSG00000018931	Sequencing
tarbase	mmu-miR-15a-5p	Guf1	231279	ENSMUSG00000029208	Sequencing
tarbase	mmu-miR-15a-5p	Hap1	15114	ENSMUSG00000006930	Sequencing
tarbase	mmu-miR-15a-5p	Heatr3	234549	ENSMUSG00000031657	Sequencing
tarbase	mmu-miR-15a-5p	Heg1	77446	ENSMUSG00000075254	Sequencing
tarbase	mmu-miR-15a-5p	Herc3	73998	ENSMUSG00000029804	Sequencing
tarbase	mmu-miR-15a-5p	Hnrnpa2b1	53379	ENSMUSG00000004980	Sequencing
tarbase	mmu-miR-15a-5p	Hnrnpa2b1	100045191	ENSMUSG00000004980	Sequencing
tarbase	mmu-miR-15a-5p	Hpcal4	170638	ENSMUSG00000046093	Sequencing
tarbase	mmu-miR-15a-5p	Hps3	12807	ENSMUSG00000027615	Sequencing
tarbase	mmu-miR-15a-5p	Hs6st1	50785	ENSMUSG00000045216	Sequencing
tarbase	mmu-miR-15a-5p	Hspa12a	73442	ENSMUSG00000025092	Sequencing
tarbase	mmu-miR-15a-5p	Hus1	15574	ENSMUSG00000020413	Sequencing
tarbase	mmu-miR-15a-5p	Hyou1	12282	ENSMUSG00000032115	Sequencing
tarbase	mmu-miR-15a-5p	Igf1	16000	ENSMUSG00000020053	Sequencing
tarbase	mmu-miR-15a-5p	Igf1r	16001	ENSMUSG00000005533	Sequencing
tarbase	mmu-miR-15a-5p	Igfbp3	16009	ENSMUSG00000020427	Sequencing
tarbase	mmu-miR-15a-5p	Ikbkg	16151	ENSMUSG00000004221	Sequencing
tarbase	mmu-miR-15a-5p	Il18bp	16068	ENSMUSG00000070427	Sequencing
tarbase	mmu-miR-15a-5p	Itgb8	320910	ENSMUSG00000025321	Sequencing
tarbase	mmu-miR-15a-5p	Itpr1	16438	ENSMUSG00000030102	Sequencing
tarbase	mmu-miR-15a-5p	Kank2	235041	ENSMUSG00000032194	Sequencing
tarbase	mmu-miR-15a-5p	Kbtbd11	74901	ENSMUSG00000055675	Sequencing
tarbase	mmu-miR-15a-5p	Kcna1	16485	ENSMUSG00000047976	Sequencing
tarbase	mmu-miR-15a-5p	Kcnc3	16504	ENSMUSG00000062785	Sequencing
tarbase	mmu-miR-15a-5p	Kcnj10	16513	ENSMUSG00000044708	Sequencing
tarbase	mmu-miR-15a-5p	Kcnj2	16518	ENSMUSG00000041695	Sequencing
tarbase	mmu-miR-15a-5p	Kctd5	69259	ENSMUSG00000016946	Sequencing
tarbase	mmu-miR-15a-5p	Kif13a	16553	ENSMUSG00000021375	Sequencing
tarbase	mmu-miR-15a-5p	Kif21b	16565	ENSMUSG00000041642	Sequencing
tarbase	mmu-miR-15a-5p	Klhl18	270201	ENSMUSG00000054792	Sequencing
tarbase	mmu-miR-15a-5p	Klhl2	77113	ENSMUSG00000031605	Sequencing
tarbase	mmu-miR-15a-5p	Klhl22	224023	ENSMUSG00000022750	Sequencing
tarbase	mmu-miR-15a-5p	Klhl23	277396	ENSMUSG00000042155	Sequencing
tarbase	mmu-miR-15a-5p	Klhl32	212390	ENSMUSG00000040387	Sequencing
tarbase	mmu-miR-15a-5p	Kpna1	16646	ENSMUSG00000022905	Sequencing
tarbase	mmu-miR-15a-5p	Kpna3	16648	ENSMUSG00000021929	Sequencing
tarbase	mmu-miR-15a-5p	Kpnb1	16211	ENSMUSG00000001440	Sequencing
tarbase	mmu-miR-15a-5p	Larp5		ENSMUSG00000033499	Sequencing
tarbase	mmu-miR-15a-5p	Lcor	212391	ENSMUSG00000025019	Sequencing
tarbase	mmu-miR-15a-5p	Lcorl	209707	ENSMUSG00000015882	Sequencing
tarbase	mmu-miR-15a-5p	Lmbrd1	68421	ENSMUSG00000073725	Sequencing
tarbase	mmu-miR-15a-5p	Lnp	69605	ENSMUSG00000009207	Sequencing
tarbase	mmu-miR-15a-5p	Lonrf3	74365	ENSMUSG00000016239	Sequencing
tarbase	mmu-miR-15a-5p	Lphn2	99633	ENSMUSG00000028184	Sequencing
tarbase	mmu-miR-15a-5p	Lpin1	14245	ENSMUSG00000020593	Sequencing
tarbase	mmu-miR-15a-5p	Lrig2	269473	ENSMUSG00000032913	Sequencing
tarbase	mmu-miR-15a-5p	Lrp1b	94217	ENSMUSG00000049252	Sequencing
tarbase	mmu-miR-15a-5p	Macf1	11426	ENSMUSG00000028649	Sequencing
tarbase	mmu-miR-15a-5p	Maea	59003	ENSMUSG00000079562	Sequencing
tarbase	mmu-miR-15a-5p	Man2a1	17158	ENSMUSG00000024085	Sequencing
tarbase	mmu-miR-15a-5p	Mapk3	26417	ENSMUSG00000063065	Sequencing
tarbase	mmu-miR-15a-5p	Mapkapk3	102626	ENSMUSG00000032577	Sequencing
tarbase	mmu-miR-15a-5p	Mark2	13728	ENSMUSG00000024969	Sequencing
tarbase	mmu-miR-15a-5p	Mcf2l	17207	ENSMUSG00000031442	Sequencing
tarbase	mmu-miR-15a-5p	Megf9	230316	ENSMUSG00000039270	Sequencing
tarbase	mmu-miR-15a-5p	Mepce	231803	ENSMUSG00000029726	Sequencing
tarbase	mmu-miR-15a-5p	Mgat3	17309	ENSMUSG00000042428	Sequencing
tarbase	mmu-miR-15a-5p	Mgll	23945	ENSMUSG00000033174	Sequencing
tarbase	mmu-miR-15a-5p	Mlf2	30853	ENSMUSG00000030120	Sequencing
tarbase	mmu-miR-15a-5p	Mll1	214162	ENSMUSG00000002028	Sequencing
tarbase	mmu-miR-15a-5p	Mll3	231051	ENSMUSG00000038056	Sequencing
tarbase	mmu-miR-15a-5p	Mllt11	56772	ENSMUSG00000053192	Sequencing
tarbase	mmu-miR-15a-5p	Mmd	67468	ENSMUSG00000003948	Sequencing
tarbase	mmu-miR-15a-5p	Mov10	17454	ENSMUSG00000002227	Sequencing
tarbase	mmu-miR-15a-5p	Mpped1	223726	ENSMUSG00000041708	Sequencing
tarbase	mmu-miR-15a-5p	Mtap1a		ENSMUSG00000027254	Sequencing
tarbase	mmu-miR-15a-5p	Mtap9		ENSMUSG00000033900	Sequencing
tarbase	mmu-miR-15a-5p	Mtmr4	170749	ENSMUSG00000018401	Sequencing
tarbase	mmu-miR-15a-5p	Myo10	17909	ENSMUSG00000022272	Sequencing
tarbase	mmu-miR-15a-5p	Myo16	244281	ENSMUSG00000039057	Sequencing
tarbase	mmu-miR-15a-5p	Myo5a	17918	ENSMUSG00000034593	Sequencing
tarbase	mmu-miR-15a-5p	N4bp1	80750	ENSMUSG00000031652	Sequencing
tarbase	mmu-miR-15a-5p	Nap1l4	17955	ENSMUSG00000059119	Sequencing
tarbase	mmu-miR-15a-5p	Ncan	13004	ENSMUSG00000002341	Sequencing
tarbase	mmu-miR-15a-5p	Ncor1	20185	ENSMUSG00000018501	Sequencing
tarbase	mmu-miR-15a-5p	Ndufa4	17992	ENSMUSG00000029632	Sequencing
tarbase	mmu-miR-15a-5p	Neo1	18007	ENSMUSG00000032340	Sequencing
tarbase	mmu-miR-15a-5p	Neurod1	18012	ENSMUSG00000034701	Sequencing
tarbase	mmu-miR-15a-5p	Nf1	18015	ENSMUSG00000020716	Sequencing
tarbase	mmu-miR-15a-5p	Nfatc1	18018	ENSMUSG00000033016	Sequencing
tarbase	mmu-miR-15a-5p	Nfe2l1	18023	ENSMUSG00000038615	Sequencing
tarbase	mmu-miR-15a-5p	Nfx1	74164	ENSMUSG00000028423	Sequencing
tarbase	mmu-miR-15a-5p	Npal3		ENSMUSG00000028803	Sequencing
tarbase	mmu-miR-15a-5p	Nptxr	73340	ENSMUSG00000022421	Sequencing
tarbase	mmu-miR-15a-5p	Nptxr	504193	ENSMUSG00000022421	Sequencing
tarbase	mmu-miR-15a-5p	Nr2c2	22026	ENSMUSG00000005893	Sequencing
tarbase	mmu-miR-15a-5p	Nr2f2	11819	ENSMUSG00000030551	Sequencing
tarbase	mmu-miR-15a-5p	Nt5dc3	103466	ENSMUSG00000054027	Sequencing
tarbase	mmu-miR-15a-5p	Ntm	235106	ENSMUSG00000059974	Sequencing
tarbase	mmu-miR-15a-5p	Nup210	54563	ENSMUSG00000030091	Sequencing
tarbase	mmu-miR-15a-5p	Odz1		ENSMUSG00000016150	Sequencing
tarbase	mmu-miR-15a-5p	Olfm1	56177	ENSMUSG00000026833	Sequencing
tarbase	mmu-miR-15a-5p	Olfm3	229759	ENSMUSG00000027965	Sequencing
tarbase	mmu-miR-15a-5p	Omg	18377	ENSMUSG00000049612	Sequencing
tarbase	mmu-miR-15a-5p	Onecut2	225631	ENSMUSG00000045991	Sequencing
tarbase	mmu-miR-15a-5p	Osbpl8	237542	ENSMUSG00000020189	Sequencing
tarbase	mmu-miR-15a-5p	OTTMUSG00000015750		ENSMUSG00000074736	Sequencing
tarbase	mmu-miR-15a-5p	P2ry12	70839	ENSMUSG00000036353	Sequencing
tarbase	mmu-miR-15a-5p	P4hb	18453	ENSMUSG00000025130	Sequencing
tarbase	mmu-miR-15a-5p	Padi2	18600	ENSMUSG00000028927	Sequencing
tarbase	mmu-miR-15a-5p	Pafah1b1	18472	ENSMUSG00000020745	Sequencing
tarbase	mmu-miR-15a-5p	Paqr8	74229	ENSMUSG00000025931	Sequencing
tarbase	mmu-miR-15a-5p	Pcdha5	12936	ENSMUSG00000007440	Sequencing
tarbase	mmu-miR-15a-5p	Pcdha5	12942	ENSMUSG00000007440	Sequencing
tarbase	mmu-miR-15a-5p	Pcdha5	12943	ENSMUSG00000007440	Sequencing
tarbase	mmu-miR-15a-5p	Pcdha5	116731	ENSMUSG00000007440	Sequencing
tarbase	mmu-miR-15a-5p	Pcdha5	192161	ENSMUSG00000007440	Sequencing
tarbase	mmu-miR-15a-5p	Pcdha5	192164	ENSMUSG00000007440	Sequencing
tarbase	mmu-miR-15a-5p	Pcdha5	353234	ENSMUSG00000007440	Sequencing
tarbase	mmu-miR-15a-5p	Pcdha5	353236	ENSMUSG00000007440	Sequencing
tarbase	mmu-miR-15a-5p	Pcdha5	353237	ENSMUSG00000007440	Sequencing
tarbase	mmu-miR-15a-5p	Pcdha6		ENSMUSG00000079714	Sequencing
tarbase	mmu-miR-15a-5p	Pcgf3	69587	ENSMUSG00000033623	Sequencing
tarbase	mmu-miR-15a-5p	Pcnx	54604	ENSMUSG00000021140	Sequencing
tarbase	mmu-miR-15a-5p	Pctk2		ENSMUSG00000020015	Sequencing
tarbase	mmu-miR-15a-5p	Peg3	18616	ENSMUSG00000002265	Sequencing
tarbase	mmu-miR-15a-5p	Pfkfb4	270198	ENSMUSG00000025648	Sequencing
tarbase	mmu-miR-15a-5p	Phf14	75725	ENSMUSG00000029629	Sequencing
tarbase	mmu-miR-15a-5p	Phip	83946	ENSMUSG00000032253	Sequencing
tarbase	mmu-miR-15a-5p	Pi4k2a	84095	ENSMUSG00000025178	Sequencing
tarbase	mmu-miR-15a-5p	Pid1	98496	ENSMUSG00000045658	Sequencing
tarbase	mmu-miR-15a-5p	Pik3r1	18708	ENSMUSG00000041417	Sequencing
tarbase	mmu-miR-15a-5p	Pik3r3	18710	ENSMUSG00000028698	Sequencing
tarbase	mmu-miR-15a-5p	Pitpna	18738	ENSMUSG00000017781	Sequencing
tarbase	mmu-miR-15a-5p	Pitpnm2	19679	ENSMUSG00000029406	Sequencing
tarbase	mmu-miR-15a-5p	Plagl1	22634	ENSMUSG00000019817	Sequencing
tarbase	mmu-miR-15a-5p	Pld3	18807	ENSMUSG00000003363	Sequencing
tarbase	mmu-miR-15a-5p	Plk2	20620	ENSMUSG00000021701	Sequencing
tarbase	mmu-miR-15a-5p	Plscr4	235527	ENSMUSG00000032377	Sequencing
tarbase	mmu-miR-15a-5p	Pofut1	140484	ENSMUSG00000046020	Sequencing
tarbase	mmu-miR-15a-5p	Poldip2	67811	ENSMUSG00000001100	Sequencing
tarbase	mmu-miR-15a-5p	Polr3a	218832	ENSMUSG00000025280	Sequencing
tarbase	mmu-miR-15a-5p	Ppargc1b	170826	ENSMUSG00000033871	Sequencing
tarbase	mmu-miR-15a-5p	Ppig	228005	ENSMUSG00000042133	Sequencing
tarbase	mmu-miR-15a-5p	Ppp1r12c	232807	ENSMUSG00000019254	Sequencing
tarbase	mmu-miR-15a-5p	Prdm11	100042784	ENSMUSG00000075028	Sequencing
tarbase	mmu-miR-15a-5p	Prkar2a	19087	ENSMUSG00000032601	Sequencing
tarbase	mmu-miR-15a-5p	Prmt5	27374	ENSMUSG00000023110	Sequencing
tarbase	mmu-miR-15a-5p	Prosapip1		ENSMUSG00000037703	Sequencing
tarbase	mmu-miR-15a-5p	Psme4	103554	ENSMUSG00000040850	Sequencing
tarbase	mmu-miR-15a-5p	Ptprd	19266	ENSMUSG00000028399	Sequencing
tarbase	mmu-miR-15a-5p	Qk	19317	ENSMUSG00000062078	Sequencing
tarbase	mmu-miR-15a-5p	Qk	101055707	ENSMUSG00000044407	Sequencing
tarbase	mmu-miR-15a-5p	Qk	101056603	ENSMUSG00000044407	Sequencing
tarbase	mmu-miR-15a-5p	Rab14	68365	ENSMUSG00000026878	Sequencing
tarbase	mmu-miR-15a-5p	Rab34	19376	ENSMUSG00000002059	Sequencing
tarbase	mmu-miR-15a-5p	Rab9b	319642	ENSMUSG00000043463	Sequencing
tarbase	mmu-miR-15a-5p	Rad9b	231724	ENSMUSG00000038569	Sequencing
tarbase	mmu-miR-15a-5p	Raf1	110157	ENSMUSG00000000441	Sequencing
tarbase	mmu-miR-15a-5p	Rap1gds1	229877	ENSMUSG00000028149	Sequencing
tarbase	mmu-miR-15a-5p	Rars2	109093	ENSMUSG00000028292	Sequencing
tarbase	mmu-miR-15a-5p	Rasgef1b	320292	ENSMUSG00000029333	Sequencing
tarbase	mmu-miR-15a-5p	Rcan2	53901	ENSMUSG00000039601	Sequencing
tarbase	mmu-miR-15a-5p	Rdh13	108841	ENSMUSG00000008435	Sequencing
tarbase	mmu-miR-15a-5p	Reep1	52250	ENSMUSG00000052852	Sequencing
tarbase	mmu-miR-15a-5p	Reep2	225362	ENSMUSG00000038555	Sequencing
tarbase	mmu-miR-15a-5p	Reep4	72549	ENSMUSG00000033589	Sequencing
tarbase	mmu-miR-15a-5p	Rev3l	19714	ENSMUSG00000019841	Sequencing
tarbase	mmu-miR-15a-5p	Rhobtb3	73296	ENSMUSG00000021589	Sequencing
tarbase	mmu-miR-15a-5p	Rims3	242662	ENSMUSG00000032890	Sequencing
tarbase	mmu-miR-15a-5p	Rnf111	93836	ENSMUSG00000032217	Sequencing
tarbase	mmu-miR-15a-5p	Rnf214	235315	ENSMUSG00000042790	Sequencing
tarbase	mmu-miR-15a-5p	Rnf24	51902	ENSMUSG00000048911	Sequencing
tarbase	mmu-miR-15a-5p	Rnf4	19822	ENSMUSG00000029110	Sequencing
tarbase	mmu-miR-15a-5p	Rnf40	233900	ENSMUSG00000030816	Sequencing
tarbase	mmu-miR-15a-5p	Rsbn1	229675	ENSMUSG00000044098	Sequencing
tarbase	mmu-miR-15a-5p	Rsrc2	208606	ENSMUSG00000029422	Sequencing
tarbase	mmu-miR-15a-5p	Rtn3	20168	ENSMUSG00000024758	Sequencing
tarbase	mmu-miR-15a-5p	Sacm1l	83493	ENSMUSG00000025240	Sequencing
tarbase	mmu-miR-15a-5p	Scd1	20249	ENSMUSG00000037071	Sequencing
tarbase	mmu-miR-15a-5p	Scn2a1	110876	ENSMUSG00000075318	Sequencing
tarbase	mmu-miR-15a-5p	Scn4b	399548	ENSMUSG00000046480	Sequencing
tarbase	mmu-miR-15a-5p	Scn8a	20273	ENSMUSG00000023033	Sequencing
tarbase	mmu-miR-15a-5p	Sec11a	56529	ENSMUSG00000025724	Sequencing
tarbase	mmu-miR-15a-5p	Sec24a	77371	ENSMUSG00000036391	Sequencing
tarbase	mmu-miR-15a-5p	Sema3a	20346	ENSMUSG00000028883	Sequencing
tarbase	mmu-miR-15a-5p	Sema3d	108151	ENSMUSG00000040254	Sequencing
tarbase	mmu-miR-15a-5p	Sema6d	214968	ENSMUSG00000027200	Sequencing
tarbase	mmu-miR-15a-5p	Senp2	75826	ENSMUSG00000022855	Sequencing
tarbase	mmu-miR-15a-5p	Sept3	24050	ENSMUSG00000022456	Sequencing
tarbase	mmu-miR-15a-5p	Serinc1	56442	ENSMUSG00000019877	Sequencing
tarbase	mmu-miR-15a-5p	Serinc3	26943	ENSMUSG00000017707	Sequencing
tarbase	mmu-miR-15a-5p	Sh3pxd2b	268396	ENSMUSG00000040711	Sequencing
tarbase	mmu-miR-15a-5p	Shroom4	208431	ENSMUSG00000068270	Sequencing
tarbase	mmu-miR-15a-5p	Sidt1	320007	ENSMUSG00000022696	Sequencing
tarbase	mmu-miR-15a-5p	Ski	20481	ENSMUSG00000029050	Sequencing
tarbase	mmu-miR-15a-5p	Slc11a2	18174	ENSMUSG00000023030	Sequencing
tarbase	mmu-miR-15a-5p	Slc12a2	20496	ENSMUSG00000024597	Sequencing
tarbase	mmu-miR-15a-5p	Slc1a4	55963	ENSMUSG00000020142	Sequencing
tarbase	mmu-miR-15a-5p	Slc24a3	94249	ENSMUSG00000063873	Sequencing
tarbase	mmu-miR-15a-5p	Slc25a22	68267	ENSMUSG00000019082	Sequencing
tarbase	mmu-miR-15a-5p	Slc27a1	26457	ENSMUSG00000031808	Sequencing
tarbase	mmu-miR-15a-5p	Slc2a3	20527	ENSMUSG00000003153	Sequencing
tarbase	mmu-miR-15a-5p	Slc31a1	20529	ENSMUSG00000066150	Sequencing
tarbase	mmu-miR-15a-5p	Slc35a4	67843	ENSMUSG00000033272	Sequencing
tarbase	mmu-miR-15a-5p	Slc38a2	67760	ENSMUSG00000022462	Sequencing
tarbase	mmu-miR-15a-5p	Slc38a7	234595	ENSMUSG00000036534	Sequencing
tarbase	mmu-miR-15a-5p	Slc39a9	328133	ENSMUSG00000048833	Sequencing
tarbase	mmu-miR-15a-5p	Slc4a8	59033	ENSMUSG00000023032	Sequencing
tarbase	mmu-miR-15a-5p	Slc6a11	243616	ENSMUSG00000030307	Sequencing
tarbase	mmu-miR-15a-5p	Slc7a14	241919	ENSMUSG00000069072	Sequencing
tarbase	mmu-miR-15a-5p	Slc8a1	20541	ENSMUSG00000054640	Sequencing
tarbase	mmu-miR-15a-5p	Slc9a5	277973	ENSMUSG00000014786	Sequencing
tarbase	mmu-miR-15a-5p	Smad2	17126	ENSMUSG00000024563	Sequencing
tarbase	mmu-miR-15a-5p	Smad4	17128	ENSMUSG00000024515	Sequencing
tarbase	mmu-miR-15a-5p	Smad7	17131	ENSMUSG00000025880	Sequencing
tarbase	mmu-miR-15a-5p	Smg7	226517	ENSMUSG00000042772	Sequencing
tarbase	mmu-miR-15a-5p	Smyd4	319822	ENSMUSG00000018809	Sequencing
tarbase	mmu-miR-15a-5p	Snx30	209131	ENSMUSG00000028385	Sequencing
tarbase	mmu-miR-15a-5p	Sos1	20662	ENSMUSG00000024241	Sequencing
tarbase	mmu-miR-15a-5p	Sparc	20692	ENSMUSG00000018593	Sequencing
tarbase	mmu-miR-15a-5p	Spire1	68166	ENSMUSG00000024533	Sequencing
tarbase	mmu-miR-15a-5p	Spnb3		ENSMUSG00000067889	Sequencing
tarbase	mmu-miR-15a-5p	Spred1	114715	ENSMUSG00000027351	Sequencing
tarbase	mmu-miR-15a-5p	Sprn	212518	ENSMUSG00000045733	Sequencing
tarbase	mmu-miR-15a-5p	Spryd3	223918	ENSMUSG00000036966	Sequencing
tarbase	mmu-miR-15a-5p	Sptlc1	268656	ENSMUSG00000021468	Sequencing
tarbase	mmu-miR-15a-5p	Srp14	20813	ENSMUSG00000009549	Sequencing
tarbase	mmu-miR-15a-5p	Srp14	100504988	ENSMUSG00000009549	Sequencing
tarbase	mmu-miR-15a-5p	Srp72	66661	ENSMUSG00000036323	Sequencing
tarbase	mmu-miR-15a-5p	Sstr1	20605	ENSMUSG00000035431	Sequencing
tarbase	mmu-miR-15a-5p	Stam2	56324	ENSMUSG00000055371	Sequencing
tarbase	mmu-miR-15a-5p	Stard4	170459	ENSMUSG00000024378	Sequencing
tarbase	mmu-miR-15a-5p	Stat2	20847	ENSMUSG00000040033	Sequencing
tarbase	mmu-miR-15a-5p	Steap3	68428	ENSMUSG00000026389	Sequencing
tarbase	mmu-miR-15a-5p	Stk35	67333	ENSMUSG00000037885	Sequencing
tarbase	mmu-miR-15a-5p	Stk38	106504	ENSMUSG00000024006	Sequencing
tarbase	mmu-miR-15a-5p	Stk4	58231	ENSMUSG00000018209	Sequencing
tarbase	mmu-miR-15a-5p	Stk40	74178	ENSMUSG00000042608	Sequencing
tarbase	mmu-miR-15a-5p	Strn	268980	ENSMUSG00000024077	Sequencing
tarbase	mmu-miR-15a-5p	Stxbp3a	20912	ENSMUSG00000027882	Sequencing
tarbase	mmu-miR-15a-5p	Sucla2	20916	ENSMUSG00000022110	Sequencing
tarbase	mmu-miR-15a-5p	Sult4a1	29859	ENSMUSG00000018865	Sequencing
tarbase	mmu-miR-15a-5p	Sv2a	64051	ENSMUSG00000038486	Sequencing
tarbase	mmu-miR-15a-5p	Sv2b	64176	ENSMUSG00000053025	Sequencing
tarbase	mmu-miR-15a-5p	Synj1	104015	ENSMUSG00000022973	Sequencing
tarbase	mmu-miR-15a-5p	Syt3	20981	ENSMUSG00000030731	Sequencing
tarbase	mmu-miR-15a-5p	Tacc1	320165	ENSMUSG00000065954	Sequencing
tarbase	mmu-miR-15a-5p	Tanc2	77097	ENSMUSG00000053580	Sequencing
tarbase	mmu-miR-15a-5p	Tarsl2	272396	ENSMUSG00000030515	Sequencing
tarbase	mmu-miR-15a-5p	Tbk1	56480	ENSMUSG00000020115	Sequencing
tarbase	mmu-miR-15a-5p	Tgfbr1	21812	ENSMUSG00000007613	Sequencing
tarbase	mmu-miR-15a-5p	Tle4	21888	ENSMUSG00000024642	Sequencing
tarbase	mmu-miR-15a-5p	Tmc7	209760	ENSMUSG00000042246	Sequencing
tarbase	mmu-miR-15a-5p	Tmem109	68539	ENSMUSG00000034659	Sequencing
tarbase	mmu-miR-15a-5p	Tmem164	209497	ENSMUSG00000047045	Sequencing
tarbase	mmu-miR-15a-5p	Tmem184b	223693	ENSMUSG00000009035	Sequencing
tarbase	mmu-miR-15a-5p	Tmem28	620592	ENSMUSG00000071719	Sequencing
tarbase	mmu-miR-15a-5p	Tmtc2	278279	ENSMUSG00000036019	Sequencing
tarbase	mmu-miR-15a-5p	Tnks	21951	ENSMUSG00000031529	Sequencing
tarbase	mmu-miR-15a-5p	Tnrc6b	213988	ENSMUSG00000047888	Sequencing
tarbase	mmu-miR-15a-5p	Tpcn1	252972	ENSMUSG00000032741	Sequencing
tarbase	mmu-miR-15a-5p	Traf3	22031	ENSMUSG00000021277	Sequencing
tarbase	mmu-miR-15a-5p	Trim33	94093	ENSMUSG00000033014	Sequencing
tarbase	mmu-miR-15a-5p	Trim62	67525	ENSMUSG00000041000	Sequencing
tarbase	mmu-miR-15a-5p	Trit1	66966	ENSMUSG00000028653	Sequencing
tarbase	mmu-miR-15a-5p	Trp53inp2	68728	ENSMUSG00000038375	Sequencing
tarbase	mmu-miR-15a-5p	Trrap	100683	ENSMUSG00000045482	Sequencing
tarbase	mmu-miR-15a-5p	Tsc22d1	21807	ENSMUSG00000022010	Sequencing
tarbase	mmu-miR-15a-5p	Tspan7	21912	ENSMUSG00000058254	Sequencing
tarbase	mmu-miR-15a-5p	Tsr2	69499	ENSMUSG00000025264	Sequencing
tarbase	mmu-miR-15a-5p	Ttc14	67120	ENSMUSG00000027677	Sequencing
tarbase	mmu-miR-15a-5p	Ttc3	22129	ENSMUSG00000040785	Sequencing
tarbase	mmu-miR-15a-5p	Tubb5	22154	ENSMUSG00000001525	Sequencing
tarbase	mmu-miR-15a-5p	Tulp4	68842	ENSMUSG00000034377	Sequencing
tarbase	mmu-miR-15a-5p	Tulp4	100040500	ENSMUSG00000034377	Sequencing
tarbase	mmu-miR-15a-5p	Txndc13		ENSMUSG00000034723	Sequencing
tarbase	mmu-miR-15a-5p	Txnip	56338	ENSMUSG00000038393	Sequencing
tarbase	mmu-miR-15a-5p	Uba1	22201	ENSMUSG00000001924	Sequencing
tarbase	mmu-miR-15a-5p	Ube2n	93765	ENSMUSG00000074781	Sequencing
tarbase	mmu-miR-15a-5p	Ube2n	100046119	ENSMUSG00000074781	Sequencing
tarbase	mmu-miR-15a-5p	Ube2q1	70093	ENSMUSG00000042572	Sequencing
tarbase	mmu-miR-15a-5p	Ube4b	63958	ENSMUSG00000028960	Sequencing
tarbase	mmu-miR-15a-5p	Ubiad1	71707	ENSMUSG00000047719	Sequencing
tarbase	mmu-miR-15a-5p	Ufc1	66155	ENSMUSG00000062963	Sequencing
tarbase	mmu-miR-15a-5p	Usp22	216825	ENSMUSG00000042506	Sequencing
tarbase	mmu-miR-15a-5p	Utrn	22288	ENSMUSG00000019820	Sequencing
tarbase	mmu-miR-15a-5p	Utx		ENSMUSG00000037369	Sequencing
tarbase	mmu-miR-15a-5p	Vezt	215008	ENSMUSG00000036099	Sequencing
tarbase	mmu-miR-15a-5p	Vhl	22346	ENSMUSG00000033933	Sequencing
tarbase	mmu-miR-15a-5p	Vps13c	320528	ENSMUSG00000035284	Sequencing
tarbase	mmu-miR-15a-5p	Vps37c	107305	ENSMUSG00000048832	Sequencing
tarbase	mmu-miR-15a-5p	Wasf3	245880	ENSMUSG00000029636	Sequencing
tarbase	mmu-miR-15a-5p	Wdtc1	230796	ENSMUSG00000037622	Sequencing
tarbase	mmu-miR-15a-5p	Wee1	22390	ENSMUSG00000031016	Sequencing
tarbase	mmu-miR-15a-5p	Yaf2	67057	ENSMUSG00000022634	Sequencing
tarbase	mmu-miR-15a-5p	Yipf6	77929	ENSMUSG00000047694	Sequencing
tarbase	mmu-miR-15a-5p	Ywhae	22627	ENSMUSG00000020849	Sequencing
tarbase	mmu-miR-15a-5p	Ywhag	22628	ENSMUSG00000051391	Sequencing
tarbase	mmu-miR-15a-5p	Zbtb10	229055	ENSMUSG00000069114	Sequencing
tarbase	mmu-miR-15a-5p	Zbtb5	230119	ENSMUSG00000049657	Sequencing
tarbase	mmu-miR-15a-5p	Zdhhc20	75965	ENSMUSG00000021969	Sequencing
tarbase	mmu-miR-15a-5p	Zer1	227693	ENSMUSG00000039686	Sequencing
tarbase	mmu-miR-15a-5p	Zfp275	27081	ENSMUSG00000031365	Sequencing
tarbase	mmu-miR-15a-5p	Zfp280b	64453	ENSMUSG00000049764	Sequencing
tarbase	mmu-miR-15a-5p	Zfp397	69256	ENSMUSG00000024276	Sequencing
tarbase	mmu-miR-15a-5p	Zfp618	72701	ENSMUSG00000028358	Sequencing
tarbase	mmu-miR-15a-5p	Zfp655	72611	ENSMUSG00000007812	Sequencing
tarbase	mmu-miR-15a-5p	Zfp664	269704	ENSMUSG00000079215	Sequencing
tarbase	mmu-miR-15a-5p	Zfp704	170753	ENSMUSG00000040209	Sequencing
tarbase	mmu-miR-15a-5p	Zfp827	622675	ENSMUSG00000071064	Sequencing
tarbase	mmu-miR-15a-5p	Zkscan1	74570	ENSMUSG00000029729	Sequencing
tarbase	mmu-miR-15a-5p	Zmiz2	52915	ENSMUSG00000041164	Sequencing
tarbase	mmu-miR-15a-5p	Znrf3	407821	ENSMUSG00000041961	Sequencing
tarbase	mmu-miR-15a-5p	Zw10	26951	ENSMUSG00000032264	Sequencing
tarbase	mmu-miR-15a-5p	Zyg11b	414872	ENSMUSG00000034636	Sequencing

## Sheet: mmu-miR-15b-5p
database	mature_mirna_id	target_symbol	target_entrez	target_ensembl	experiment	pubmed_id
mirtarbase	mmu-miR-15b-5p	Arl2	56327	ENSMUSG00000024944	Luciferase reporter assay//qRT-PCR//Western blot	20007690

## Sheet: mmu-miR-17-5p
database	mature_mirna_id	target_symbol	target_entrez	target_ensembl	experiment	pubmed_id
mirecords	mmu-miR-17-5p	Rbl2	19651	ENSMUSG00000031666		17765889
mirecords	mmu-miR-17-5p	Tgfbr2			Western blot	21972292
mirecords	mmu-miR-17-5p	CREB1			Western blot	21972292
mirecords	mmu-miR-17-5p	CREB1			Western blot	21972292
mirtarbase	mmu-miR-17-5p	Abca1	11303	ENSMUSG00000015243	Sequencing	19536157
mirtarbase	mmu-miR-17-5p	Macf1	11426	ENSMUSG00000028649	Sequencing	19536157
mirtarbase	mmu-miR-17-5p	Acvr1b	11479	ENSMUSG00000000532	Sequencing	19536157
mirtarbase	mmu-miR-17-5p	Adam10	11487	ENSMUSG00000054693	Sequencing	19536157
mirtarbase	mmu-miR-17-5p	Adam17	11491	ENSMUSG00000052593	Sequencing	19536157
mirtarbase	mmu-miR-17-5p	Adam19	11492	ENSMUSG00000011256	Sequencing	19536157
mirtarbase	mmu-miR-17-5p	Adcyap1r1	11517	ENSMUSG00000029778	Sequencing	19536157
mirtarbase	mmu-miR-17-5p	Anp32a	11737	ENSMUSG00000032249	Sequencing	19536157
mirtarbase	mmu-miR-17-5p	Ap3d1	11776	ENSMUSG00000020198	Sequencing	19536157
mirtarbase	mmu-miR-17-5p	Aplp2	11804	ENSMUSG00000031996	Sequencing	19536157
mirtarbase	mmu-miR-17-5p	App	11820	ENSMUSG00000022892	Sequencing	19536157
mirtarbase	mmu-miR-17-5p	Zfhx3	11906	ENSMUSG00000038872	Sequencing	19536157
mirtarbase	mmu-miR-17-5p	Atf2	11909	ENSMUSG00000027104	Sequencing	19536157
mirtarbase	mmu-miR-17-5p	Slc7a2	11988	ENSMUSG00000031596	Sequencing	19536157
mirtarbase	mmu-miR-17-5p	Bcl2l11	12125	ENSMUSG00000027381	Immunofluorescence//Immunohistochemistry//In situ hybridization//Luciferase reporter assay//Western blot	21546576
mirtarbase	mmu-miR-17-5p	Bmp4	12159	ENSMUSG00000021835	qRT-PCR	19559694
mirtarbase	mmu-miR-17-5p	Btg2	12227	ENSMUSG00000020423	Sequencing	19536157
mirtarbase	mmu-miR-17-5p	C1qa	12259	ENSMUSG00000036887	Sequencing	19536157
mirtarbase	mmu-miR-17-5p	Cacna2d1	12293	ENSMUSG00000040118	Sequencing	19536157
mirtarbase	mmu-miR-17-5p	Capn2	12334	ENSMUSG00000026509	Sequencing	19536157
mirtarbase	mmu-miR-17-5p	Cav1	12389	ENSMUSG00000007655	Sequencing	19536157
mirtarbase	mmu-miR-17-5p	Cbx2	12416	ENSMUSG00000025577	Sequencing	19536157
mirtarbase	mmu-miR-17-5p	Cdc7	12545	ENSMUSG00000029283	Sequencing	19536157
mirtarbase	mmu-miR-17-5p	Cdh2	12558	ENSMUSG00000024304	Sequencing	19536157
mirtarbase	mmu-miR-17-5p	Chl1	12661	ENSMUSG00000030077	Sequencing	19536157
mirtarbase	mmu-miR-17-5p	Col4a2	12827	ENSMUSG00000031503	Sequencing	19536157
mirtarbase	mmu-miR-17-5p	Cops2	12848	ENSMUSG00000027206	Sequencing	19536157
mirtarbase	mmu-miR-17-5p	Cpe	12876	ENSMUSG00000037852	Sequencing	19536157
mirtarbase	mmu-miR-17-5p	Dpysl2	12934	ENSMUSG00000022048	Sequencing	19536157
mirtarbase	mmu-miR-17-5p	Dio2	13371	ENSMUSG00000007682	Sequencing	19536157
mirtarbase	mmu-miR-17-5p	Dmd	13405	ENSMUSG00000045103	Sequencing	19536157
mirtarbase	mmu-miR-17-5p	Dnmt3a	13435	ENSMUSG00000020661	Sequencing	19536157
mirtarbase	mmu-miR-17-5p	Eef2k	13631	ENSMUSG00000035064	Sequencing	19536157
mirtarbase	mmu-miR-17-5p	En2	13799	ENSMUSG00000039095	Sequencing	19536157
mirtarbase	mmu-miR-17-5p	Epha7	13841	ENSMUSG00000028289	Sequencing	19536157
mirtarbase	mmu-miR-17-5p	Eps15	13858	ENSMUSG00000028552	Sequencing	19536157
mirtarbase	mmu-miR-17-5p	Erbb4	13869	ENSMUSG00000062209	Sequencing	19536157
mirtarbase	mmu-miR-17-5p	Celf2	14007	ENSMUSG00000002107	Sequencing	19536157
mirtarbase	mmu-miR-17-5p	Ezh1	14055	ENSMUSG00000006920	Sequencing	19536157
mirtarbase	mmu-miR-17-5p	F3	14066	ENSMUSG00000028128	Sequencing	19536157
mirtarbase	mmu-miR-17-5p	Fn1	14268	ENSMUSG00000026193	Sequencing	19536157
mirtarbase	mmu-miR-17-5p	Gabra1	14394	ENSMUSG00000010803	Sequencing	19536157
mirtarbase	mmu-miR-17-5p	Gabrb3	14402	ENSMUSG00000033676	Sequencing	19536157
mirtarbase	mmu-miR-17-5p	B4galnt1	14421	ENSMUSG00000006731	Sequencing	19536157
mirtarbase	mmu-miR-17-5p	Gas7	14457	ENSMUSG00000033066	Sequencing	19536157
mirtarbase	mmu-miR-17-5p	Gng4	14706	ENSMUSG00000021303	Sequencing	19536157
mirtarbase	mmu-miR-17-5p	Gpm6b	14758	ENSMUSG00000031342	Sequencing	19536157
mirtarbase	mmu-miR-17-5p	Grb10	14783	ENSMUSG00000020176	Sequencing	19536157
mirtarbase	mmu-miR-17-5p	Trip12	14897	ENSMUSG00000026219	Sequencing	19536157
mirtarbase	mmu-miR-17-5p	Hsd17b10	15108	ENSMUSG00000025260	Sequencing	19536157
mirtarbase	mmu-miR-17-5p	Kpnb1	16211	ENSMUSG00000001440	Sequencing	19536157
mirtarbase	mmu-miR-17-5p	Ajuba	16475	ENSMUSG00000022178	Sequencing	19536157
mirtarbase	mmu-miR-17-5p	Kif21a	16564	ENSMUSG00000022629	Sequencing	19536157
mirtarbase	mmu-miR-17-5p	Kif5a	16572	ENSMUSG00000074657	Sequencing	19536157
mirtarbase	mmu-miR-17-5p	Kif5c	16574	ENSMUSG00000026764	Sequencing	19536157
mirtarbase	mmu-miR-17-5p	Klf9	16601	ENSMUSG00000033863	Sequencing	19536157
mirtarbase	mmu-miR-17-5p	Kras	16653	ENSMUSG00000030265	Sequencing	19536157
mirtarbase	mmu-miR-17-5p	Lrrn3	16981	ENSMUSG00000036295	Sequencing	19536157
mirtarbase	mmu-miR-17-5p	M6pr	17113	ENSMUSG00000007458	Sequencing	19536157
mirtarbase	mmu-miR-17-5p	Mcl1	17210	ENSMUSG00000038612	Sequencing	19536157
mirtarbase	mmu-miR-17-5p	Mcm7	17220	ENSMUSG00000029730	Sequencing	19536157
mirtarbase	mmu-miR-17-5p	Mrc1	17533	ENSMUSG00000026712	Sequencing	19536157
mirtarbase	mmu-miR-17-5p	Map1a	17754	ENSMUSG00000027254	Sequencing	19536157
mirtarbase	mmu-miR-17-5p	Map2	17756	ENSMUSG00000015222	Sequencing	19536157
mirtarbase	mmu-miR-17-5p	Map4	17758	ENSMUSG00000032479	Sequencing	19536157
mirtarbase	mmu-miR-17-5p	Myo10	17909	ENSMUSG00000022272	Sequencing	19536157
mirtarbase	mmu-miR-17-5p	Napb	17957	ENSMUSG00000027438	Sequencing	19536157
mirtarbase	mmu-miR-17-5p	Ncam1	17967	ENSMUSG00000039542	Sequencing	19536157
mirtarbase	mmu-miR-17-5p	Neurod1	18012	ENSMUSG00000034701	Sequencing	19536157
mirtarbase	mmu-miR-17-5p	Nf1	18015	ENSMUSG00000020716	Sequencing	19536157
mirtarbase	mmu-miR-17-5p	Nfe2l2	18024	ENSMUSG00000015839	Sequencing	19536157
mirtarbase	mmu-miR-17-5p	Nfia	18027	ENSMUSG00000028565	Sequencing	19536157
mirtarbase	mmu-miR-17-5p	Nptx1	18164	ENSMUSG00000025582	Sequencing	19536157
mirtarbase	mmu-miR-17-5p	Nsg2	18197	ENSMUSG00000020297	Sequencing	19536157
mirtarbase	mmu-miR-17-5p	Oprl1	18389	ENSMUSG00000027584	Sequencing	19536157
mirtarbase	mmu-miR-17-5p	Pappa	18491	ENSMUSG00000028370	Sequencing	19536157
mirtarbase	mmu-miR-17-5p	Pfn2	18645	ENSMUSG00000027805	Sequencing	19536157
mirtarbase	mmu-miR-17-5p	Plxna2	18845	ENSMUSG00000026640	Sequencing	19536157
mirtarbase	mmu-miR-17-5p	Ppp3r1	19058	ENSMUSG00000033953	Sequencing	19536157
mirtarbase	mmu-miR-17-5p	Cyth1	19157	ENSMUSG00000017132	Sequencing	19536157
mirtarbase	mmu-miR-17-5p	Pten	19211	ENSMUSG00000013663	Western blot;qRT-PCR	20008935
mirtarbase	mmu-miR-17-5p	Ptpn11	19247	ENSMUSG00000043733	Sequencing	19536157
mirtarbase	mmu-miR-17-5p	Ptprg	19270	ENSMUSG00000021745	Sequencing	19536157
mirtarbase	mmu-miR-17-5p	Ptprj	19271	ENSMUSG00000025314	Sequencing	19536157
mirtarbase	mmu-miR-17-5p	Rab12	19328	ENSMUSG00000023460	Sequencing	19536157
mirtarbase	mmu-miR-17-5p	Rab33b	19338	ENSMUSG00000027739	Sequencing	19536157
mirtarbase	mmu-miR-17-5p	Ranbp2	19386	ENSMUSG00000003226	Sequencing	19536157
mirtarbase	mmu-miR-17-5p	Rasal1	19415	ENSMUSG00000029602	Sequencing	19536157
mirtarbase	mmu-miR-17-5p	Rb1	19645	ENSMUSG00000022105	Sequencing	19536157
mirtarbase	mmu-miR-17-5p	Rbl2	19651	ENSMUSG00000031666	Luciferase reporter assay//qRT-PCR//Western blot//Reporter assay	18287052
mirtarbase	mmu-miR-17-5p	Rbl2	19651	ENSMUSG00000031666	Immunofluorescence//Luciferase reporter assay//Microarray//Reporter assay	17765889
mirtarbase	mmu-miR-17-5p	Rdx	19684	ENSMUSG00000032050	Sequencing	19536157
mirtarbase	mmu-miR-17-5p	Rev3l	19714	ENSMUSG00000019841	Sequencing	19536157
mirtarbase	mmu-miR-17-5p	Ralgds	19730	ENSMUSG00000026821	Sequencing	19536157
mirtarbase	mmu-miR-17-5p	Rora	19883	ENSMUSG00000032238	Sequencing	19536157
mirtarbase	mmu-miR-17-5p	Ryr2	20191	ENSMUSG00000021313	Sequencing	19536157
mirtarbase	mmu-miR-17-5p	Scn1a	20265	ENSMUSG00000064329	Sequencing	19536157
mirtarbase	mmu-miR-17-5p	Scn8a	20273	ENSMUSG00000023033	Sequencing	19536157
mirtarbase	mmu-miR-17-5p	Scp2	20280	ENSMUSG00000028603	Sequencing	19536157
mirtarbase	mmu-miR-17-5p	Cxcl12	20315	ENSMUSG00000061353	Sequencing	19536157
mirtarbase	mmu-miR-17-5p	Sema3c	20348	ENSMUSG00000028780	Sequencing	19536157
mirtarbase	mmu-miR-17-5p	Sepp1	20363	ENSMUSG00000064373	Sequencing	19536157
mirtarbase	mmu-miR-17-5p	Shh	20423	ENSMUSG00000002633	Sequencing	19536157
mirtarbase	mmu-miR-17-5p	Ski	20481	ENSMUSG00000029050	Sequencing	19536157
mirtarbase	mmu-miR-17-5p	Skil	20482	ENSMUSG00000027660	Sequencing	19536157
mirtarbase	mmu-miR-17-5p	Sox8	20681	ENSMUSG00000024176	Sequencing	19536157
mirtarbase	mmu-miR-17-5p	Sall3	20689	ENSMUSG00000024565	Sequencing	19536157
mirtarbase	mmu-miR-17-5p	Serpinb9	20723	ENSMUSG00000045827	Sequencing	19536157
mirtarbase	mmu-miR-17-5p	Stat3	20848	ENSMUSG00000004040	qRT-PCR//Luciferase reporter assay//Western blot	19073166
mirtarbase	mmu-miR-17-5p	Stat3	20848	ENSMUSG00000004040	immunoblot//immunocytochemistry//Luciferase reporter assay//qRT-PCR//Reporter assay;Western blot;qRT-PCR;Other	19559694
mirtarbase	mmu-miR-17-5p	Syt1	20979	ENSMUSG00000035864	Sequencing	19536157
mirtarbase	mmu-miR-17-5p	Ubtf	21429	ENSMUSG00000020923	Sequencing	19536157
mirtarbase	mmu-miR-17-5p	Tex2	21763	ENSMUSG00000040548	Sequencing	19536157
mirtarbase	mmu-miR-17-5p	Tgfa	21802	ENSMUSG00000029999	Sequencing	19536157
mirtarbase	mmu-miR-17-5p	Ift88	21821	ENSMUSG00000040040	Sequencing	19536157
mirtarbase	mmu-miR-17-5p	Klf10	21847	ENSMUSG00000037465	Sequencing	19536157
mirtarbase	mmu-miR-17-5p	Tnks	21951	ENSMUSG00000031529	Sequencing	19536157
mirtarbase	mmu-miR-17-5p	Ugcg	22234	ENSMUSG00000028381	Sequencing	19536157
mirtarbase	mmu-miR-17-5p	Wfs1	22393	ENSMUSG00000039474	Sequencing	19536157
mirtarbase	mmu-miR-17-5p	Zmat3	22401	ENSMUSG00000027663	Sequencing	19536157
mirtarbase	mmu-miR-17-5p	Xpc	22591	ENSMUSG00000030094	Sequencing	19536157
mirtarbase	mmu-miR-17-5p	Yy1	22632	ENSMUSG00000021264	Sequencing	19536157
mirtarbase	mmu-miR-17-5p	Rnf103	22644	ENSMUSG00000052656	Sequencing	19536157
mirtarbase	mmu-miR-17-5p	Zfp62	22720	ENSMUSG00000046311	Sequencing	19536157
mirtarbase	mmu-miR-17-5p	Zic2	22772	ENSMUSG00000061524	Sequencing	19536157
mirtarbase	mmu-miR-17-5p	Akt3	23797	ENSMUSG00000019699	Sequencing	19536157
mirtarbase	mmu-miR-17-5p	Gtf2h2	23894	ENSMUSG00000021639	Sequencing	19536157
mirtarbase	mmu-miR-17-5p	Mgll	23945	ENSMUSG00000033174	Sequencing	19536157
mirtarbase	mmu-miR-17-5p	Tenm4	23966	ENSMUSG00000048078	Sequencing	19536157
mirtarbase	mmu-miR-17-5p	Xrn1	24127	ENSMUSG00000032410	Sequencing	19536157
mirtarbase	mmu-miR-17-5p	Zeb2	24136	ENSMUSG00000026872	Sequencing	19536157
mirtarbase	mmu-miR-17-5p	Map3k5	26408	ENSMUSG00000071369	Sequencing	19536157
mirtarbase	mmu-miR-17-5p	Map4k2	26412	ENSMUSG00000024948	Sequencing	19536157
mirtarbase	mmu-miR-17-5p	Mapk14	26416	ENSMUSG00000053436	immunoblot//immunocytochemistry//Luciferase reporter assay//qRT-PCR//Reporter assay;Western blot;qRT-PCR;Other	19559694
mirtarbase	mmu-miR-17-5p	Mapk14	26416	ENSMUSG00000053436	Sequencing	19536157
mirtarbase	mmu-miR-17-5p	Nbea	26422	ENSMUSG00000027799	Sequencing	19536157
mirtarbase	mmu-miR-17-5p	B3galt2	26878	ENSMUSG00000033849	Sequencing	19536157
mirtarbase	mmu-miR-17-5p	Aifm1	26926	ENSMUSG00000036932	Sequencing	19536157
mirtarbase	mmu-miR-17-5p	St6galnac5	26938	ENSMUSG00000039037	Sequencing	19536157
mirtarbase	mmu-miR-17-5p	Sh3d19	27059	ENSMUSG00000028082	Sequencing	19536157
mirtarbase	mmu-miR-17-5p	Tceb3	27224	ENSMUSG00000028668	Sequencing	19536157
mirtarbase	mmu-miR-17-5p	Amot	27494	ENSMUSG00000041688	Sequencing	19536157
mirtarbase	mmu-miR-17-5p	D4Wsu53e	27981	ENSMUSG00000037266	Sequencing	19536157
mirtarbase	mmu-miR-17-5p	Mga	29808	ENSMUSG00000033943	Sequencing	19536157
mirtarbase	mmu-miR-17-5p	Rabgap1l	29809	ENSMUSG00000026721	Sequencing	19536157
mirtarbase	mmu-miR-17-5p	Igfbp7	29817	ENSMUSG00000036256	Sequencing	19536157
mirtarbase	mmu-miR-17-5p	Spast	50850	ENSMUSG00000024068	Sequencing	19536157
mirtarbase	mmu-miR-17-5p	Tmod2	50876	ENSMUSG00000032186	Sequencing	19536157
mirtarbase	mmu-miR-17-5p	Pvr	52118	ENSMUSG00000040511	Sequencing	19536157
mirtarbase	mmu-miR-17-5p	Reep1	52250	ENSMUSG00000052852	Sequencing	19536157
mirtarbase	mmu-miR-17-5p	Brms1l	52592	ENSMUSG00000012076	Sequencing	19536157
mirtarbase	mmu-miR-17-5p	Tmx4	52837	ENSMUSG00000034723	Sequencing	19536157
mirtarbase	mmu-miR-17-5p	Gramd1a	52857	ENSMUSG00000001248	Sequencing	19536157
mirtarbase	mmu-miR-17-5p	Cd164	53599	ENSMUSG00000019818	Sequencing	19536157
mirtarbase	mmu-miR-17-5p	Insm1	53626	ENSMUSG00000068154	Sequencing	19536157
mirtarbase	mmu-miR-17-5p	Celsr2	53883	ENSMUSG00000068740	Sequencing	19536157
mirtarbase	mmu-miR-17-5p	Rcan3	53902	ENSMUSG00000059713	Sequencing	19536157
mirtarbase	mmu-miR-17-5p	Socs6	54607	ENSMUSG00000056153	Sequencing	19536157
mirtarbase	mmu-miR-17-5p	Extl3	54616	ENSMUSG00000021978	Sequencing	19536157
mirtarbase	mmu-miR-17-5p	Plagl2	54711	ENSMUSG00000051413	Sequencing	19536157
mirtarbase	mmu-miR-17-5p	Slc1a4	55963	ENSMUSG00000020142	Sequencing	19536157
mirtarbase	mmu-miR-17-5p	Srcin1	56013	ENSMUSG00000038453	Sequencing	19536157
mirtarbase	mmu-miR-17-5p	Mycbp	56309	ENSMUSG00000028647	Sequencing	19536157
mirtarbase	mmu-miR-17-5p	Serinc1	56442	ENSMUSG00000019877	Sequencing	19536157
mirtarbase	mmu-miR-17-5p	Sh3bgrl	56726	ENSMUSG00000031246	Sequencing	19536157
mirtarbase	mmu-miR-17-5p	Sez6l	56747	ENSMUSG00000058153	Sequencing	19536157
mirtarbase	mmu-miR-17-5p	Cend1	57754	ENSMUSG00000060240	Sequencing	19536157
mirtarbase	mmu-miR-17-5p	Extl2	58193	ENSMUSG00000027963	Sequencing	19536157
mirtarbase	mmu-miR-17-5p	Smoc2	64074	ENSMUSG00000023886	Sequencing	19536157
mirtarbase	mmu-miR-17-5p	Itm2c	64294	ENSMUSG00000026223	Sequencing	19536157
mirtarbase	mmu-miR-17-5p	Dip2a	64451	ENSMUSG00000020231	Sequencing	19536157
mirtarbase	mmu-miR-17-5p	Dpysl5	65254	ENSMUSG00000029168	Sequencing	19536157
mirtarbase	mmu-miR-17-5p	Rogdi	66049	ENSMUSG00000022540	Sequencing	19536157
mirtarbase	mmu-miR-17-5p	Camk2n1	66259	ENSMUSG00000046447	Sequencing	19536157
mirtarbase	mmu-miR-17-5p	Smim20	66278	ENSMUSG00000061461	Sequencing	19536157
mirtarbase	mmu-miR-17-5p	Rnf220	66743	ENSMUSG00000028677	Sequencing	19536157
mirtarbase	mmu-miR-17-5p	Kdelr2	66913	ENSMUSG00000079111	Sequencing	19536157
mirtarbase	mmu-miR-17-5p	Pbrm1	66923	ENSMUSG00000042323	Sequencing	19536157
mirtarbase	mmu-miR-17-5p	Polr3k	67005	ENSMUSG00000038628	Sequencing	19536157
mirtarbase	mmu-miR-17-5p	Ttc14	67120	ENSMUSG00000027677	Sequencing	19536157
mirtarbase	mmu-miR-17-5p	Tomm34	67145	ENSMUSG00000018322	Sequencing	19536157
mirtarbase	mmu-miR-17-5p	Zfand4	67492	ENSMUSG00000042213	Sequencing	19536157
mirtarbase	mmu-miR-17-5p	Cpeb4	67579	ENSMUSG00000020300	Sequencing	19536157
mirtarbase	mmu-miR-17-5p	Luc7l3	67684	ENSMUSG00000020863	Sequencing	19536157
mirtarbase	mmu-miR-17-5p	Ppp6c	67857	ENSMUSG00000026753	Sequencing	19536157
mirtarbase	mmu-miR-17-5p	1600012H06Rik	67912	ENSMUSG00000050088	Sequencing	19536157
mirtarbase	mmu-miR-17-5p	Ppap2b	67916	ENSMUSG00000028517	Sequencing	19536157
mirtarbase	mmu-miR-17-5p	Fam134c	67998	ENSMUSG00000017802	Sequencing	19536157
mirtarbase	mmu-miR-17-5p	Sdccag3	68112	ENSMUSG00000026927	Sequencing	19536157
mirtarbase	mmu-miR-17-5p	Lmbrd1	68421	ENSMUSG00000073725	Sequencing	19536157
mirtarbase	mmu-miR-17-5p	Eml1	68519	ENSMUSG00000058070	Sequencing	19536157
mirtarbase	mmu-miR-17-5p	Ubr3	68795	ENSMUSG00000044308	Sequencing	19536157
mirtarbase	mmu-miR-17-5p	Aspscr1	68938	ENSMUSG00000025142	Sequencing	19536157
mirtarbase	mmu-miR-17-5p	Necab1	69352	ENSMUSG00000040536	Sequencing	19536157
mirtarbase	mmu-miR-17-5p	Ttc9	69480	ENSMUSG00000042734	Sequencing	19536157
mirtarbase	mmu-miR-17-5p	Lnp	69605	ENSMUSG00000009207	Sequencing	19536157
mirtarbase	mmu-miR-17-5p	Hdac8	70315	ENSMUSG00000067567	Sequencing	19536157
mirtarbase	mmu-miR-17-5p	Draxin	70433	ENSMUSG00000029005	Sequencing	19536157
mirtarbase	mmu-miR-17-5p	Tmem230	70612	ENSMUSG00000027341	Sequencing	19536157
mirtarbase	mmu-miR-17-5p	Rasgef1a	70727	ENSMUSG00000030134	Sequencing	19536157
mirtarbase	mmu-miR-17-5p	Pgrmc2	70804	ENSMUSG00000049940	Sequencing	19536157
mirtarbase	mmu-miR-17-5p	Spag9	70834	ENSMUSG00000020859	Sequencing	19536157
mirtarbase	mmu-miR-17-5p	4931406C07Rik	70984	ENSMUSG00000031938	Sequencing	19536157
mirtarbase	mmu-miR-17-5p	Zfp597	71063	ENSMUSG00000039789	Sequencing	19536157
mirtarbase	mmu-miR-17-5p	Scara5	71145	ENSMUSG00000022032	Sequencing	19536157
mirtarbase	mmu-miR-17-5p	Fbxo9	71538	ENSMUSG00000001366	Sequencing	19536157
mirtarbase	mmu-miR-17-5p	4930506M07Rik	71653	ENSMUSG00000041362	Sequencing	19536157
mirtarbase	mmu-miR-17-5p	March8	71779	ENSMUSG00000025702	Sequencing	19536157
mirtarbase	mmu-miR-17-5p	Dhx36	72162	ENSMUSG00000027770	Sequencing	19536157
mirtarbase	mmu-miR-17-5p	2510009E07Rik	72190	ENSMUSG00000043391	Sequencing	19536157
mirtarbase	mmu-miR-17-5p	Cdc42se2	72729	ENSMUSG00000052298	Sequencing	19536157
mirtarbase	mmu-miR-17-5p	Fam117b	72750	ENSMUSG00000041040	Sequencing	19536157
mirtarbase	mmu-miR-17-5p	Slc17a7	72961	ENSMUSG00000070570	Sequencing	19536157
mirtarbase	mmu-miR-17-5p	Ccser2	72972	ENSMUSG00000058690	Sequencing	19536157
mirtarbase	mmu-miR-17-5p	Dcbld2	73379	ENSMUSG00000035107	Sequencing	19536157
mirtarbase	mmu-miR-17-5p	1700052N19Rik	73419	ENSMUSG00000061759	Sequencing	19536157
mirtarbase	mmu-miR-17-5p	Ppp1r21	73825	ENSMUSG00000034709	Sequencing	19536157
mirtarbase	mmu-miR-17-5p	Otud4	73945	ENSMUSG00000036990	Sequencing	19536157
mirtarbase	mmu-miR-17-5p	Dnm1l	74006	ENSMUSG00000022789	Sequencing	19536157
mirtarbase	mmu-miR-17-5p	Msl1	74026	ENSMUSG00000052915	Sequencing	19536157
mirtarbase	mmu-miR-17-5p	Cmtr1	74157	ENSMUSG00000024019	Sequencing	19536157
mirtarbase	mmu-miR-17-5p	Zdhhc16	74168	ENSMUSG00000025157	Sequencing	19536157
mirtarbase	mmu-miR-17-5p	Ankrd9	74251	ENSMUSG00000037904	Sequencing	19536157
mirtarbase	mmu-miR-17-5p	Cyld	74256	ENSMUSG00000036712	Sequencing	19536157
mirtarbase	mmu-miR-17-5p	Zfp84	74352	ENSMUSG00000046185	Sequencing	19536157
mirtarbase	mmu-miR-17-5p	Cds1	74596	ENSMUSG00000029330	Sequencing	19536157
mirtarbase	mmu-miR-17-5p	Pcf11	74737	ENSMUSG00000041328	Sequencing	19536157
mirtarbase	mmu-miR-17-5p	Dhcr24	74754	ENSMUSG00000034926	Sequencing	19536157
mirtarbase	mmu-miR-17-5p	Etnk1	75320	ENSMUSG00000030275	Sequencing	19536157
mirtarbase	mmu-miR-17-5p	Pik3r4	75669	ENSMUSG00000032571	Sequencing	19536157
mirtarbase	mmu-miR-17-5p	Pank1	75735	ENSMUSG00000033610	Sequencing	19536157
mirtarbase	mmu-miR-17-5p	Rab30	75985	ENSMUSG00000030643	Sequencing	19536157
mirtarbase	mmu-miR-17-5p	Slc24a2	76376	ENSMUSG00000037996	Sequencing	19536157
mirtarbase	mmu-miR-17-5p	Slc10a7	76775	ENSMUSG00000031684	Sequencing	19536157
mirtarbase	mmu-miR-17-5p	Klhl2	77113	ENSMUSG00000031605	Sequencing	19536157
mirtarbase	mmu-miR-17-5p	Crebrf	77128	ENSMUSG00000048249	Sequencing	19536157
mirtarbase	mmu-miR-17-5p	Wdr82	77305	ENSMUSG00000020257	Sequencing	19536157
mirtarbase	mmu-miR-17-5p	Heg1	77446	ENSMUSG00000075254	Sequencing	19536157
mirtarbase	mmu-miR-17-5p	Limch1	77569	ENSMUSG00000037736	Sequencing	19536157
mirtarbase	mmu-miR-17-5p	Polq	77782	ENSMUSG00000034206	Sequencing	19536157
mirtarbase	mmu-miR-17-5p	6030458C11Rik	77877	ENSMUSG00000022195	Sequencing	19536157
mirtarbase	mmu-miR-17-5p	Yipf6	77929	ENSMUSG00000047694	Sequencing	19536157
mirtarbase	mmu-miR-17-5p	2810055G20Rik	77994		Sequencing	19536157
mirtarbase	mmu-miR-17-5p	Msantd4	78100	ENSMUSG00000041124	Sequencing	19536157
mirtarbase	mmu-miR-17-5p	Map7d2	78283	ENSMUSG00000041020	Sequencing	19536157
mirtarbase	mmu-miR-17-5p	Acap2	78618	ENSMUSG00000049076	Sequencing	19536157
mirtarbase	mmu-miR-17-5p	Stxbp5	78808	ENSMUSG00000019790	Sequencing	19536157
mirtarbase	mmu-miR-17-5p	Igsf3	78908	ENSMUSG00000042035	Sequencing	19536157
mirtarbase	mmu-miR-17-5p	Trim2	80890	ENSMUSG00000027993	Sequencing	19536157
mirtarbase	mmu-miR-17-5p	Pum1	80912	ENSMUSG00000028580	Sequencing	19536157
mirtarbase	mmu-miR-17-5p	Gpr63	81006	ENSMUSG00000040372	Sequencing	19536157
mirtarbase	mmu-miR-17-5p	Ankrd17	81702	ENSMUSG00000055204	Sequencing	19536157
mirtarbase	mmu-miR-17-5p	Entpd7	93685	ENSMUSG00000025192	Sequencing	19536157
mirtarbase	mmu-miR-17-5p	Pabpc5	93728	ENSMUSG00000034732	Sequencing	19536157
mirtarbase	mmu-miR-17-5p	Aff4	93736	ENSMUSG00000049470	Sequencing	19536157
mirtarbase	mmu-miR-17-5p	Nipa2	93790	ENSMUSG00000030452	Sequencing	19536157
mirtarbase	mmu-miR-17-5p	Brwd1	93871	ENSMUSG00000022914	Sequencing	19536157
mirtarbase	mmu-miR-17-5p	Tnfrsf21	94185	ENSMUSG00000023915	Sequencing	19536157
mirtarbase	mmu-miR-17-5p	Phlpp1	98432	ENSMUSG00000044340	Sequencing	19536157
mirtarbase	mmu-miR-17-5p	Znfx1	98999	ENSMUSG00000039501	Sequencing	19536157
mirtarbase	mmu-miR-17-5p	Qser1	99003	ENSMUSG00000074994	Sequencing	19536157
mirtarbase	mmu-miR-17-5p	Camta1	100072	ENSMUSG00000014592	Sequencing	19536157
mirtarbase	mmu-miR-17-5p	Tmem64	100201	ENSMUSG00000043252	Sequencing	19536157
mirtarbase	mmu-miR-17-5p	Mapre3	100732	ENSMUSG00000029166	Sequencing	19536157
mirtarbase	mmu-miR-17-5p	Nt5dc3	103466	ENSMUSG00000054027	Sequencing	19536157
mirtarbase	mmu-miR-17-5p	Aldh6a1	104776	ENSMUSG00000021238	Sequencing	19536157
mirtarbase	mmu-miR-17-5p	Foxp1	108655	ENSMUSG00000030067	Reporter assay	21248104
mirtarbase	mmu-miR-17-5p	Ccdc88a	108686	ENSMUSG00000032740	Sequencing	19536157
mirtarbase	mmu-miR-17-5p	Ankhd1	108857	ENSMUSG00000024483	Sequencing	19536157
mirtarbase	mmu-miR-17-5p	Sobp	109205	ENSMUSG00000038248	Sequencing	19536157
mirtarbase	mmu-miR-17-5p	Tspan9	109246	ENSMUSG00000030352	Sequencing	19536157
mirtarbase	mmu-miR-17-5p	Cald1	109624	ENSMUSG00000029761	Sequencing	19536157
mirtarbase	mmu-miR-17-5p	Atxn3	110616	ENSMUSG00000021189	Sequencing	19536157
mirtarbase	mmu-miR-17-5p	Scn2a1	110876	ENSMUSG00000075318	Sequencing	19536157
mirtarbase	mmu-miR-17-5p	Derl2	116891	ENSMUSG00000018442	Sequencing	19536157
mirtarbase	mmu-miR-17-5p	Bmp2k	140780	ENSMUSG00000034663	Sequencing	19536157
mirtarbase	mmu-miR-17-5p	Elovl6	170439	ENSMUSG00000041220	Sequencing	19536157
mirtarbase	mmu-miR-17-5p	Zfp704	170753	ENSMUSG00000040209	Sequencing	19536157
mirtarbase	mmu-miR-17-5p	Fchsd2	207278	ENSMUSG00000030691	Sequencing	19536157
mirtarbase	mmu-miR-17-5p	Fam120c	207375	ENSMUSG00000025262	Sequencing	19536157
mirtarbase	mmu-miR-17-5p	Wdr37	207615	ENSMUSG00000021147	Sequencing	19536157
mirtarbase	mmu-miR-17-5p	A330021E22Rik	207686	ENSMUSG00000040473	Sequencing	19536157
mirtarbase	mmu-miR-17-5p	Mlxip	208104	ENSMUSG00000038342	Sequencing	19536157
mirtarbase	mmu-miR-17-5p	Rsrc2	208606	ENSMUSG00000029422	Sequencing	19536157
mirtarbase	mmu-miR-17-5p	Cpeb3	208922	ENSMUSG00000039652	Sequencing	19536157
mirtarbase	mmu-miR-17-5p	Tfe3	209446	ENSMUSG00000000134	Sequencing	19536157
mirtarbase	mmu-miR-17-5p	Tbc1d12	209478	ENSMUSG00000048720	Sequencing	19536157
mirtarbase	mmu-miR-17-5p	Nudcd3	209586	ENSMUSG00000053838	Sequencing	19536157
mirtarbase	mmu-miR-17-5p	Lcorl	209707	ENSMUSG00000015882	Sequencing	19536157
mirtarbase	mmu-miR-17-5p	Slc35f3	210027	ENSMUSG00000057060	Sequencing	19536157
mirtarbase	mmu-miR-17-5p	Lpp	210126	ENSMUSG00000033306	Sequencing	19536157
mirtarbase	mmu-miR-17-5p	D15Ertd621e	210998	ENSMUSG00000037119	Sequencing	19536157
mirtarbase	mmu-miR-17-5p	Arap2	212285	ENSMUSG00000037999	Sequencing	19536157
mirtarbase	mmu-miR-17-5p	Rassf4	213391	ENSMUSG00000042129	Sequencing	19536157
mirtarbase	mmu-miR-17-5p	Nudt18	213484	ENSMUSG00000045211	Sequencing	19536157
mirtarbase	mmu-miR-17-5p	Tnrc6b	213988	ENSMUSG00000047888	Sequencing	19536157
mirtarbase	mmu-miR-17-5p	Slc36a1	215335	ENSMUSG00000020261	Sequencing	19536157
mirtarbase	mmu-miR-17-5p	Appl2	216190	ENSMUSG00000020263	Sequencing	19536157
mirtarbase	mmu-miR-17-5p	March9	216438	ENSMUSG00000040502	Sequencing	19536157
mirtarbase	mmu-miR-17-5p	Papolg	216578	ENSMUSG00000020273	Sequencing	19536157
mirtarbase	mmu-miR-17-5p	Taok1	216965	ENSMUSG00000017291	Sequencing	19536157
mirtarbase	mmu-miR-17-5p	Hid1	217310	ENSMUSG00000034586	Sequencing	19536157
mirtarbase	mmu-miR-17-5p	Ubxn2a	217379	ENSMUSG00000020634	Sequencing	19536157
mirtarbase	mmu-miR-17-5p	Mylip	218203	ENSMUSG00000038175	Sequencing	19536157
mirtarbase	mmu-miR-17-5p	Rasa1	218397	ENSMUSG00000021549	Sequencing	19536157
mirtarbase	mmu-miR-17-5p	Fcho2	218503	ENSMUSG00000041685	Sequencing	19536157
mirtarbase	mmu-miR-17-5p	March6	223455	ENSMUSG00000039100	Sequencing	19536157
mirtarbase	mmu-miR-17-5p	Fam49b	223601	ENSMUSG00000022378	Sequencing	19536157
mirtarbase	mmu-miR-17-5p	Pim3	223775	ENSMUSG00000035828	Sequencing	19536157
mirtarbase	mmu-miR-17-5p	Gxylt1	223827	ENSMUSG00000036197	Sequencing	19536157
mirtarbase	mmu-miR-17-5p	Ankrd29	225187	ENSMUSG00000057766	Sequencing	19536157
mirtarbase	mmu-miR-17-5p	Epb4.1l5	226352	ENSMUSG00000026383	Sequencing	19536157
mirtarbase	mmu-miR-17-5p	Klhl20	226541	ENSMUSG00000026705	Sequencing	19536157
mirtarbase	mmu-miR-17-5p	Fam134a	227298	ENSMUSG00000049339	Sequencing	19536157
mirtarbase	mmu-miR-17-5p	Dgkd	227333	ENSMUSG00000070738	Sequencing	19536157
mirtarbase	mmu-miR-17-5p	Ppig	228005	ENSMUSG00000042133	Sequencing	19536157
mirtarbase	mmu-miR-17-5p	Zfp217	228913	ENSMUSG00000052056	Sequencing	19536157
mirtarbase	mmu-miR-17-5p	Ythdf3	229096	ENSMUSG00000047213	Sequencing	19536157
mirtarbase	mmu-miR-17-5p	Syt11	229521	ENSMUSG00000068923	Sequencing	19536157
mirtarbase	mmu-miR-17-5p	Rap1gds1	229877	ENSMUSG00000028149	Sequencing	19536157
mirtarbase	mmu-miR-17-5p	Megf9	230316	ENSMUSG00000039270	Sequencing	19536157
mirtarbase	mmu-miR-17-5p	Cnot6l	231464	ENSMUSG00000034724	Sequencing	19536157
mirtarbase	mmu-miR-17-5p	Ficd	231630	ENSMUSG00000053334	Sequencing	19536157
mirtarbase	mmu-miR-17-5p	Fbxo21	231670	ENSMUSG00000032898	Sequencing	19536157
mirtarbase	mmu-miR-17-5p	Wnk1	232341	ENSMUSG00000045962	Sequencing	19536157
mirtarbase	mmu-miR-17-5p	Klhl42	232539	ENSMUSG00000040102	Sequencing	19536157
mirtarbase	mmu-miR-17-5p	Rsf1	233532	ENSMUSG00000035623	Sequencing	19536157
mirtarbase	mmu-miR-17-5p	Whsc1l1	234135	ENSMUSG00000054823	Sequencing	19536157
mirtarbase	mmu-miR-17-5p	Dync1li2	234663	ENSMUSG00000035770	Sequencing	19536157
mirtarbase	mmu-miR-17-5p	Med17	234959	ENSMUSG00000031935	Sequencing	19536157
mirtarbase	mmu-miR-17-5p	Scn3b	235281	ENSMUSG00000049281	Sequencing	19536157
mirtarbase	mmu-miR-17-5p	Usp3	235441	ENSMUSG00000032376	Sequencing	19536157
mirtarbase	mmu-miR-17-5p	Fam63b	235461	ENSMUSG00000042444	Sequencing	19536157
mirtarbase	mmu-miR-17-5p	Arhgef9	236915	ENSMUSG00000025656	Sequencing	19536157
mirtarbase	mmu-miR-17-5p	Lrp11	237253	ENSMUSG00000019796	Sequencing	19536157
mirtarbase	mmu-miR-17-5p	Lrrc3	237387	ENSMUSG00000051652	Sequencing	19536157
mirtarbase	mmu-miR-17-5p	C2cd4c	237397	ENSMUSG00000045912	Sequencing	19536157
mirtarbase	mmu-miR-17-5p	Gpatch8	237943	ENSMUSG00000034621	Sequencing	19536157
mirtarbase	mmu-miR-17-5p	Zfp367	238673	ENSMUSG00000044934	Sequencing	19536157
mirtarbase	mmu-miR-17-5p	Cadm2	239857	ENSMUSG00000064115	Sequencing	19536157
mirtarbase	mmu-miR-17-5p	Tor1aip2	240832	ENSMUSG00000050565	Sequencing	19536157
mirtarbase	mmu-miR-17-5p	Lrrc55	241528	ENSMUSG00000075224	Sequencing	19536157
mirtarbase	mmu-miR-17-5p	Slc7a14	241919	ENSMUSG00000069072	Sequencing	19536157
mirtarbase	mmu-miR-17-5p	Slc44a5	242259	ENSMUSG00000028360	Sequencing	19536157
mirtarbase	mmu-miR-17-5p	Gabbr2	242425	ENSMUSG00000039809	Sequencing	19536157
mirtarbase	mmu-miR-17-5p	Rundc3b	242819	ENSMUSG00000040570	Sequencing	19536157
mirtarbase	mmu-miR-17-5p	Kbtbd8	243574	ENSMUSG00000030031	Sequencing	19536157
mirtarbase	mmu-miR-17-5p	Rgma	244058	ENSMUSG00000070509	Sequencing	19536157
mirtarbase	mmu-miR-17-5p	Zfp317	244713	ENSMUSG00000057551	Sequencing	19536157
mirtarbase	mmu-miR-17-5p	Npat	244879	ENSMUSG00000033054	Sequencing	19536157
mirtarbase	mmu-miR-17-5p	Tbc1d8b	245638	ENSMUSG00000042473	Sequencing	19536157
mirtarbase	mmu-miR-17-5p	Fat2	245827	ENSMUSG00000055333	Sequencing	19536157
mirtarbase	mmu-miR-17-5p	Alkbh5	268420	ENSMUSG00000042650	Sequencing	19536157
mirtarbase	mmu-miR-17-5p	Rab11fip4	268451	ENSMUSG00000017639	Sequencing	19536157
mirtarbase	mmu-miR-17-5p	Zfp652	268469	ENSMUSG00000075595	Sequencing	19536157
mirtarbase	mmu-miR-17-5p	Rapgefl1	268480	ENSMUSG00000038020	Sequencing	19536157
mirtarbase	mmu-miR-17-5p	Lsamp	268890	ENSMUSG00000061080	Sequencing	19536157
mirtarbase	mmu-miR-17-5p	Robo2	268902	ENSMUSG00000052516	Sequencing	19536157
mirtarbase	mmu-miR-17-5p	Nrip1	268903	ENSMUSG00000048490	Sequencing	19536157
mirtarbase	mmu-miR-17-5p	Ppp2r2c	269643	ENSMUSG00000029120	Sequencing	19536157
mirtarbase	mmu-miR-17-5p	Ogfod1	270086	ENSMUSG00000033009	Sequencing	19536157
mirtarbase	mmu-miR-17-5p	Flnb	286940	ENSMUSG00000025278	Sequencing	19536157
mirtarbase	mmu-miR-17-5p	Casc4	319996	ENSMUSG00000060227	Sequencing	19536157
mirtarbase	mmu-miR-17-5p	Islr2	320563	ENSMUSG00000051243	Sequencing	19536157
mirtarbase	mmu-miR-17-5p	Zhx3	320799	ENSMUSG00000035877	Sequencing	19536157
mirtarbase	mmu-miR-17-5p	Itgb8	320910	ENSMUSG00000025321	Sequencing	19536157
mirtarbase	mmu-miR-17-5p	Ep300	328572	ENSMUSG00000055024	Sequencing	19536157
mirtarbase	mmu-miR-17-5p	D630045J12Rik	330286	ENSMUSG00000063455	Sequencing	19536157
mirtarbase	mmu-miR-17-5p	Tmcc1	330401	ENSMUSG00000030126	Sequencing	19536157
mirtarbase	mmu-miR-17-5p	Frmpd4	333605	ENSMUSG00000049176	Sequencing	19536157
mirtarbase	mmu-miR-17-5p	Nr1d2	353187	ENSMUSG00000021775	Sequencing	19536157
mirtarbase	mmu-miR-17-5p	Prune2	353211	ENSMUSG00000039126	Sequencing	19536157
mirtarbase	mmu-miR-17-5p	Pcdha1	353236	ENSMUSG00000007440	Sequencing	19536157
mirtarbase	mmu-miR-17-5p	Pcdha10	353236	ENSMUSG00000007440	Sequencing	19536157
mirtarbase	mmu-miR-17-5p	Pcdha11	353236	ENSMUSG00000007440	Sequencing	19536157
mirtarbase	mmu-miR-17-5p	Pcdha12	353236	ENSMUSG00000007440	Sequencing	19536157
mirtarbase	mmu-miR-17-5p	Pcdha2	353236	ENSMUSG00000007440	Sequencing	19536157
mirtarbase	mmu-miR-17-5p	Pcdha4	353236	ENSMUSG00000007440	Sequencing	19536157
mirtarbase	mmu-miR-17-5p	Pcdha5	353236	ENSMUSG00000007440	Sequencing	19536157
mirtarbase	mmu-miR-17-5p	Pcdhac1	353236	ENSMUSG00000007440	Sequencing	19536157
mirtarbase	mmu-miR-17-5p	Pcdhac2	353236	ENSMUSG00000007440	Sequencing	19536157
mirtarbase	mmu-miR-17-5p	Pcdha9	353236	ENSMUSG00000007440	Sequencing	19536157
mirtarbase	mmu-miR-17-5p	Nefh	380684	ENSMUSG00000020396	Sequencing	19536157
mirtarbase	mmu-miR-17-5p	Lrch1	380916	ENSMUSG00000068015	Sequencing	19536157
mirtarbase	mmu-miR-17-5p	N4bp2l2	381695	ENSMUSG00000029655	Sequencing	19536157
mirtarbase	mmu-miR-17-5p	Taok2	381921	ENSMUSG00000059981	Sequencing	19536157
mirtarbase	mmu-miR-17-5p	Tmed8	382620	ENSMUSG00000034111	Sequencing	19536157
mirtarbase	mmu-miR-17-5p	Rnf213	672511	ENSMUSG00000070327	Sequencing	19536157
mirtarbase	mmu-miR-17-5p	Ildr2	100039795	ENSMUSG00000040612	Sequencing	19536157
tarbase	mmu-miR-17-5p	1600012H06Rik	67912	ENSMUSG00000050088	Sequencing
tarbase	mmu-miR-17-5p	1700052N19Rik	73419	ENSMUSG00000061759	Sequencing
tarbase	mmu-miR-17-5p	2510009E07Rik	72190	ENSMUSG00000043391	Sequencing
tarbase	mmu-miR-17-5p	2610109H07Rik		ENSMUSG00000029005	Sequencing
tarbase	mmu-miR-17-5p	2810055G20Rik		ENSMUSG00000090386	Sequencing
tarbase	mmu-miR-17-5p	3300001P08Rik		ENSMUSG00000020863	Sequencing
tarbase	mmu-miR-17-5p	4930506M07Rik	71653	ENSMUSG00000041362	Sequencing
tarbase	mmu-miR-17-5p	4931406C07Rik	70984	ENSMUSG00000031938	Sequencing
tarbase	mmu-miR-17-5p	4932409I22Rik		ENSMUSG00000045912	Sequencing
tarbase	mmu-miR-17-5p	5730494N06Rik		ENSMUSG00000027341	Sequencing
tarbase	mmu-miR-17-5p	6030458C11Rik	77877	ENSMUSG00000022195	Sequencing
tarbase	mmu-miR-17-5p	6330403K07Rik		ENSMUSG00000018451	Sequencing
tarbase	mmu-miR-17-5p	8430410K20Rik		ENSMUSG00000041124	Sequencing
tarbase	mmu-miR-17-5p	A230083H22Rik		ENSMUSG00000039126	Sequencing
tarbase	mmu-miR-17-5p	A330021E22Rik	207686	ENSMUSG00000040473	Sequencing
tarbase	mmu-miR-17-5p	A930001N09Rik		ENSMUSG00000048249	Sequencing
tarbase	mmu-miR-17-5p	Abca1	11303	ENSMUSG00000015243	Sequencing
tarbase	mmu-miR-17-5p	AC134463.1		ENSMUSG00000061461	Sequencing
tarbase	mmu-miR-17-5p	AC154759.2-2		ENSMUSG00000072684	Sequencing
tarbase	mmu-miR-17-5p	Acap2	78618	ENSMUSG00000049076	Sequencing
tarbase	mmu-miR-17-5p	Acvr1b	11479	ENSMUSG00000000532	Sequencing
tarbase	mmu-miR-17-5p	Adam10	11487	ENSMUSG00000054693	Sequencing
tarbase	mmu-miR-17-5p	Adam17	11491	ENSMUSG00000052593	Sequencing
tarbase	mmu-miR-17-5p	Adam19	11492	ENSMUSG00000011256	Sequencing
tarbase	mmu-miR-17-5p	Adcyap1r1	11517	ENSMUSG00000029778	Sequencing
tarbase	mmu-miR-17-5p	Aff4	93736	ENSMUSG00000049470	Sequencing
tarbase	mmu-miR-17-5p	Aifm1	26926	ENSMUSG00000036932	Sequencing
tarbase	mmu-miR-17-5p	Akt3	23797	ENSMUSG00000019699	Sequencing
tarbase	mmu-miR-17-5p	Aldh6a1	104776	ENSMUSG00000021238	Sequencing
tarbase	mmu-miR-17-5p	Alkbh5	268420	ENSMUSG00000042650	Sequencing
tarbase	mmu-miR-17-5p	Amot	27494	ENSMUSG00000041688	Sequencing
tarbase	mmu-miR-17-5p	Ankhd1	108857	ENSMUSG00000024483	Sequencing
tarbase	mmu-miR-17-5p	Ankrd17	81702	ENSMUSG00000055204	Sequencing
tarbase	mmu-miR-17-5p	Ankrd29	225187	ENSMUSG00000057766	Sequencing
tarbase	mmu-miR-17-5p	Ankrd9	74251	ENSMUSG00000037904	Sequencing
tarbase	mmu-miR-17-5p	Anp32a	11737	ENSMUSG00000032249	Sequencing
tarbase	mmu-miR-17-5p	Anubl1		ENSMUSG00000042213	Sequencing
tarbase	mmu-miR-17-5p	Ap3d1	11776	ENSMUSG00000020198	Sequencing
tarbase	mmu-miR-17-5p	Aplp2	11804	ENSMUSG00000031996	Sequencing
tarbase	mmu-miR-17-5p	App	11820	ENSMUSG00000022892	Sequencing
tarbase	mmu-miR-17-5p	Appl2	216190	ENSMUSG00000020263	Sequencing
tarbase	mmu-miR-17-5p	Arap2	212285	ENSMUSG00000037999	Sequencing
tarbase	mmu-miR-17-5p	Arhgef9	236915	ENSMUSG00000025656	Sequencing
tarbase	mmu-miR-17-5p	Aspscr1	68938	ENSMUSG00000025142	Sequencing
tarbase	mmu-miR-17-5p	Atf2	11909	ENSMUSG00000027104	Sequencing
tarbase	mmu-miR-17-5p	Atf2	100047997	ENSMUSG00000027104	Sequencing
tarbase	mmu-miR-17-5p	Atxn3	110616	ENSMUSG00000021189	Sequencing
tarbase	mmu-miR-17-5p	B230380D07Rik		ENSMUSG00000042444	Sequencing
tarbase	mmu-miR-17-5p	B3galt2	26878	ENSMUSG00000033849	Sequencing
tarbase	mmu-miR-17-5p	B4galnt1	14421	ENSMUSG00000006731	Sequencing
tarbase	mmu-miR-17-5p	BC013529		ENSMUSG00000040006	Sequencing
tarbase	mmu-miR-17-5p	BC038286		ENSMUSG00000049339	Sequencing
tarbase	mmu-miR-17-5p	beta-catenin			Other
tarbase	mmu-miR-17-5p	Bmp2k	140780	ENSMUSG00000034663	Sequencing
tarbase	mmu-miR-17-5p	Bmp4	12159	ENSMUSG00000021835	qRT-PCR
tarbase	mmu-miR-17-5p	Brms1l	52592	ENSMUSG00000012076	Sequencing
tarbase	mmu-miR-17-5p	Brwd1	93871	ENSMUSG00000022914	Sequencing
tarbase	mmu-miR-17-5p	Btg2	12227	ENSMUSG00000020423	Sequencing
tarbase	mmu-miR-17-5p	C1qa	12259	ENSMUSG00000036887	Sequencing
tarbase	mmu-miR-17-5p	C630004H02Rik		ENSMUSG00000034586	Sequencing
tarbase	mmu-miR-17-5p	Cacna2d1	12293	ENSMUSG00000040118	Sequencing
tarbase	mmu-miR-17-5p	Cadm2	239857	ENSMUSG00000064115	Sequencing
tarbase	mmu-miR-17-5p	Cald1	109624	ENSMUSG00000029761	Sequencing
tarbase	mmu-miR-17-5p	Camk2n1	66259	ENSMUSG00000046447	Sequencing
tarbase	mmu-miR-17-5p	Camta1	100072	ENSMUSG00000014592	Sequencing
tarbase	mmu-miR-17-5p	Capn2	12334	ENSMUSG00000026509	Sequencing
tarbase	mmu-miR-17-5p	Casc4	319996	ENSMUSG00000060227	Sequencing
tarbase	mmu-miR-17-5p	Cav1	12389	ENSMUSG00000007655	Sequencing
tarbase	mmu-miR-17-5p	Cbx2	12416	ENSMUSG00000025577	Sequencing
tarbase	mmu-miR-17-5p	Ccdc88a	108686	ENSMUSG00000032740	Sequencing
tarbase	mmu-miR-17-5p	Cd164	53599	ENSMUSG00000019818	Sequencing
tarbase	mmu-miR-17-5p	Cdc42se2	72729	ENSMUSG00000052298	Sequencing
tarbase	mmu-miR-17-5p	Cdc42se2	101056447	ENSMUSG00000052298	Sequencing
tarbase	mmu-miR-17-5p	Cdc7	12545	ENSMUSG00000029283	Sequencing
tarbase	mmu-miR-17-5p	Cdh2	12558	ENSMUSG00000024304	Sequencing
tarbase	mmu-miR-17-5p	Cds1	74596	ENSMUSG00000029330	Sequencing
tarbase	mmu-miR-17-5p	Celsr2	53883	ENSMUSG00000068740	Sequencing
tarbase	mmu-miR-17-5p	Cend1	57754	ENSMUSG00000060240	Sequencing
tarbase	mmu-miR-17-5p	Chl1	12661	ENSMUSG00000030077	Sequencing
tarbase	mmu-miR-17-5p	Cnot6l	231464	ENSMUSG00000034724	Sequencing
tarbase	mmu-miR-17-5p	Col4a2	12827	ENSMUSG00000031503	Sequencing
tarbase	mmu-miR-17-5p	Cops2	12848	ENSMUSG00000027206	Sequencing
tarbase	mmu-miR-17-5p	Cpe	12876	ENSMUSG00000037852	Sequencing
tarbase	mmu-miR-17-5p	Cpeb3	208922	ENSMUSG00000039652	Sequencing
tarbase	mmu-miR-17-5p	Cpeb4	67579	ENSMUSG00000020300	Sequencing
tarbase	mmu-miR-17-5p	Cugbp2		ENSMUSG00000002107	Sequencing
tarbase	mmu-miR-17-5p	Cxcl12	20315	ENSMUSG00000061353	Sequencing
tarbase	mmu-miR-17-5p	Cyld	74256	ENSMUSG00000036712	Sequencing
tarbase	mmu-miR-17-5p	Cyth1	19157	ENSMUSG00000017132	Sequencing
tarbase	mmu-miR-17-5p	D15Ertd621e	210998	ENSMUSG00000037119	Sequencing
tarbase	mmu-miR-17-5p	D4Wsu53e	27981	ENSMUSG00000037266	Sequencing
tarbase	mmu-miR-17-5p	D630045J12Rik	330286	ENSMUSG00000063455	Sequencing
tarbase	mmu-miR-17-5p	Dcbld2	73379	ENSMUSG00000035107	Sequencing
tarbase	mmu-miR-17-5p	Derl2	116891	ENSMUSG00000018442	Sequencing
tarbase	mmu-miR-17-5p	Dgkd	227333	ENSMUSG00000070738	Sequencing
tarbase	mmu-miR-17-5p	Dhcr24	74754	ENSMUSG00000034926	Sequencing
tarbase	mmu-miR-17-5p	Dhx36	72162	ENSMUSG00000027770	Sequencing
tarbase	mmu-miR-17-5p	Dio2		ENSMUSG00000007682	Sequencing
tarbase	mmu-miR-17-5p	Dip2a	64451	ENSMUSG00000020231	Sequencing
tarbase	mmu-miR-17-5p	Dmd	13405	ENSMUSG00000045103	Sequencing
tarbase	mmu-miR-17-5p	Dnm1l	74006	ENSMUSG00000022789	Sequencing
tarbase	mmu-miR-17-5p	Dnmt3a	13435	ENSMUSG00000020661	Sequencing
tarbase	mmu-miR-17-5p	Dpysl2	12934	ENSMUSG00000022048	Sequencing
tarbase	mmu-miR-17-5p	Dpysl5	65254	ENSMUSG00000029168	Sequencing
tarbase	mmu-miR-17-5p	Dync1li2	234663	ENSMUSG00000035770	Sequencing
tarbase	mmu-miR-17-5p	E-Cadherinl			qRT-PCR//Western blot//Other
tarbase	mmu-miR-17-5p	Eef2k	13631	ENSMUSG00000035064	Sequencing
tarbase	mmu-miR-17-5p	Elovl6	170439	ENSMUSG00000041220	Sequencing
tarbase	mmu-miR-17-5p	Eml1	68519	ENSMUSG00000058070	Sequencing
tarbase	mmu-miR-17-5p	En2	13799	ENSMUSG00000039095	Sequencing
tarbase	mmu-miR-17-5p	Entpd7	93685	ENSMUSG00000025192	Sequencing
tarbase	mmu-miR-17-5p	Ep300	328572	ENSMUSG00000055024	Sequencing
tarbase	mmu-miR-17-5p	Epb4.1l5	226352	ENSMUSG00000026383	Sequencing
tarbase	mmu-miR-17-5p	Epha7	13841	ENSMUSG00000028289	Sequencing
tarbase	mmu-miR-17-5p	Eps15	13858	ENSMUSG00000028552	Sequencing
tarbase	mmu-miR-17-5p	Erbb4	13869	ENSMUSG00000062209	Sequencing
tarbase	mmu-miR-17-5p	Etnk1	75320	ENSMUSG00000030275	Sequencing
tarbase	mmu-miR-17-5p	Extl2	58193	ENSMUSG00000027963	Sequencing
tarbase	mmu-miR-17-5p	Extl3	54616	ENSMUSG00000021978	Sequencing
tarbase	mmu-miR-17-5p	Ezh1	14055	ENSMUSG00000006920	Sequencing
tarbase	mmu-miR-17-5p	F3	14066	ENSMUSG00000028128	Sequencing
tarbase	mmu-miR-17-5p	Fam117b	72750	ENSMUSG00000041040	Sequencing
tarbase	mmu-miR-17-5p	Fam120c	207375	ENSMUSG00000025262	Sequencing
tarbase	mmu-miR-17-5p	Fam134c	67998	ENSMUSG00000017802	Sequencing
tarbase	mmu-miR-17-5p	Fam49b	223601	ENSMUSG00000022378	Sequencing
tarbase	mmu-miR-17-5p	Fat2	245827	ENSMUSG00000055333	Sequencing
tarbase	mmu-miR-17-5p	Fbxo21	231670	ENSMUSG00000032898	Sequencing
tarbase	mmu-miR-17-5p	Fbxo9	71538	ENSMUSG00000001366	Sequencing
tarbase	mmu-miR-17-5p	Fcho2	218503	ENSMUSG00000041685	Sequencing
tarbase	mmu-miR-17-5p	Fchsd2	207278	ENSMUSG00000030691	Sequencing
tarbase	mmu-miR-17-5p	Fgfr2b			qRT-PCR
tarbase	mmu-miR-17-5p	Ficd	231630	ENSMUSG00000053334	Sequencing
tarbase	mmu-miR-17-5p	Flnb	286940	ENSMUSG00000025278	Sequencing
tarbase	mmu-miR-17-5p	Fn1	14268	ENSMUSG00000026193	Sequencing
tarbase	mmu-miR-17-5p	Foxp1	108655	ENSMUSG00000030067	Reporter assay
tarbase	mmu-miR-17-5p	Frmpd4	333605	ENSMUSG00000049176	Sequencing
tarbase	mmu-miR-17-5p	Ftsjd2	74157	ENSMUSG00000024019	Sequencing
tarbase	mmu-miR-17-5p	Gabbr2	242425	ENSMUSG00000039809	Sequencing
tarbase	mmu-miR-17-5p	Gabra1	14394	ENSMUSG00000010803	Sequencing
tarbase	mmu-miR-17-5p	Gabrb3	14402	ENSMUSG00000033676	Sequencing
tarbase	mmu-miR-17-5p	Gas7	14457	ENSMUSG00000033066	Sequencing
tarbase	mmu-miR-17-5p	Gcap14		ENSMUSG00000058690	Sequencing
tarbase	mmu-miR-17-5p	Glt8d3		ENSMUSG00000036197	Sequencing
tarbase	mmu-miR-17-5p	Gng4	14706	ENSMUSG00000021303	Sequencing
tarbase	mmu-miR-17-5p	Gpatch8	237943	ENSMUSG00000034621	Sequencing
tarbase	mmu-miR-17-5p	Gpm6b	14758	ENSMUSG00000031342	Sequencing
tarbase	mmu-miR-17-5p	Gpr63	81006	ENSMUSG00000040372	Sequencing
tarbase	mmu-miR-17-5p	Gramd1a	52857	ENSMUSG00000001248	Sequencing
tarbase	mmu-miR-17-5p	Grb10	14783	ENSMUSG00000020176	Sequencing
tarbase	mmu-miR-17-5p	Gtf2h2	23894	ENSMUSG00000021639	Sequencing
tarbase	mmu-miR-17-5p	Hdac8	70315	ENSMUSG00000067567	Sequencing
tarbase	mmu-miR-17-5p	Heg1	77446	ENSMUSG00000075254	Sequencing
tarbase	mmu-miR-17-5p	Hsd17b10	15108	ENSMUSG00000025260	Sequencing
tarbase	mmu-miR-17-5p	Ifrg15		ENSMUSG00000079252	Sequencing
tarbase	mmu-miR-17-5p	Ift88	21821	ENSMUSG00000040040	Sequencing
tarbase	mmu-miR-17-5p	Igfbp7	29817	ENSMUSG00000036256	Sequencing
tarbase	mmu-miR-17-5p	Igsf3	78908	ENSMUSG00000042035	Sequencing
tarbase	mmu-miR-17-5p	Ildr2	100039795	ENSMUSG00000040612	Sequencing
tarbase	mmu-miR-17-5p	Insm1	53626	ENSMUSG00000068154	Sequencing
tarbase	mmu-miR-17-5p	Islr2	320563	ENSMUSG00000051243	Sequencing
tarbase	mmu-miR-17-5p	Itgb8	320910	ENSMUSG00000025321	Sequencing
tarbase	mmu-miR-17-5p	Itm2c	64294	ENSMUSG00000026223	Sequencing
tarbase	mmu-miR-17-5p	Jub		ENSMUSG00000022178	Sequencing
tarbase	mmu-miR-17-5p	Kbtbd8	243574	ENSMUSG00000030031	Sequencing
tarbase	mmu-miR-17-5p	Kdelr2	66913	ENSMUSG00000079111	Sequencing
tarbase	mmu-miR-17-5p	Kif21a	16564	ENSMUSG00000022629	Sequencing
tarbase	mmu-miR-17-5p	Kif5a	16572	ENSMUSG00000074657	Sequencing
tarbase	mmu-miR-17-5p	Kif5c	16574	ENSMUSG00000026764	Sequencing
tarbase	mmu-miR-17-5p	Klf10	21847	ENSMUSG00000037465	Sequencing
tarbase	mmu-miR-17-5p	Klf9	16601	ENSMUSG00000033863	Sequencing
tarbase	mmu-miR-17-5p	Klhdc5		ENSMUSG00000040102	Sequencing
tarbase	mmu-miR-17-5p	Klhl2	77113	ENSMUSG00000031605	Sequencing
tarbase	mmu-miR-17-5p	Klhl20	226541	ENSMUSG00000026705	Sequencing
tarbase	mmu-miR-17-5p	Klraq1		ENSMUSG00000034709	Sequencing
tarbase	mmu-miR-17-5p	Kpnb1	16211	ENSMUSG00000001440	Sequencing
tarbase	mmu-miR-17-5p	Kras	16653	ENSMUSG00000030265	Sequencing
tarbase	mmu-miR-17-5p	Lcorl	209707	ENSMUSG00000015882	Sequencing
tarbase	mmu-miR-17-5p	Limch1	77569	ENSMUSG00000037736	Sequencing
tarbase	mmu-miR-17-5p	Lmbrd1	68421	ENSMUSG00000073725	Sequencing
tarbase	mmu-miR-17-5p	Lnp	69605	ENSMUSG00000009207	Sequencing
tarbase	mmu-miR-17-5p	Lpp	210126	ENSMUSG00000033306	Sequencing
tarbase	mmu-miR-17-5p	Lrch1	380916	ENSMUSG00000068015	Sequencing
tarbase	mmu-miR-17-5p	Lrp11	237253	ENSMUSG00000019796	Sequencing
tarbase	mmu-miR-17-5p	Lrrc3	237387	ENSMUSG00000051652	Sequencing
tarbase	mmu-miR-17-5p	Lrrc55	241528	ENSMUSG00000075224	Sequencing
tarbase	mmu-miR-17-5p	Lrrn3	16981	ENSMUSG00000036295	Sequencing
tarbase	mmu-miR-17-5p	Lsamp	268890	ENSMUSG00000061080	Sequencing
tarbase	mmu-miR-17-5p	lsl1			Reporter assay
tarbase	mmu-miR-17-5p	M6pr	17113	ENSMUSG00000007458	Sequencing
tarbase	mmu-miR-17-5p	Macf1	11426	ENSMUSG00000028649	Sequencing
tarbase	mmu-miR-17-5p	Map3k5	26408	ENSMUSG00000071369	Sequencing
tarbase	mmu-miR-17-5p	Map4k2	26412	ENSMUSG00000024948	Sequencing
tarbase	mmu-miR-17-5p	Mapk14	26416	ENSMUSG00000053436	Reporter assay//qRT-PCR//Western blot//Other//Sequencing
tarbase	mmu-miR-17-5p	Mapre3	100732	ENSMUSG00000029166	Sequencing
tarbase	mmu-miR-17-5p	March6	223455	ENSMUSG00000039100	Sequencing
tarbase	mmu-miR-17-5p	March8	71779	ENSMUSG00000025702	Sequencing
tarbase	mmu-miR-17-5p	March9	216438	ENSMUSG00000040502	Sequencing
tarbase	mmu-miR-17-5p	Mcl1	17210	ENSMUSG00000038612	Sequencing
tarbase	mmu-miR-17-5p	Mcm7	17220	ENSMUSG00000029730	Sequencing
tarbase	mmu-miR-17-5p	Med17	234959	ENSMUSG00000031935	Sequencing
tarbase	mmu-miR-17-5p	Megf9	230316	ENSMUSG00000039270	Sequencing
tarbase	mmu-miR-17-5p	Mga	29808	ENSMUSG00000033943	Sequencing
tarbase	mmu-miR-17-5p	Mgll	23945	ENSMUSG00000033174	Sequencing
tarbase	mmu-miR-17-5p	Mlxip	208104	ENSMUSG00000038342	Sequencing
tarbase	mmu-miR-17-5p	Mrc1	17533	ENSMUSG00000026712	Sequencing
tarbase	mmu-miR-17-5p	Msl1	74026	ENSMUSG00000052915	Sequencing
tarbase	mmu-miR-17-5p	Mtap1a		ENSMUSG00000027254	Sequencing
tarbase	mmu-miR-17-5p	Mtap2		ENSMUSG00000015222	Sequencing
tarbase	mmu-miR-17-5p	Mtap4		ENSMUSG00000032479	Sequencing
tarbase	mmu-miR-17-5p	Mtap7d2		ENSMUSG00000041020	Sequencing
tarbase	mmu-miR-17-5p	Mycbp	56309	ENSMUSG00000028647	Sequencing
tarbase	mmu-miR-17-5p	Mylip	218203	ENSMUSG00000038175	Sequencing
tarbase	mmu-miR-17-5p	Myo10	17909	ENSMUSG00000022272	Sequencing
tarbase	mmu-miR-17-5p	N4bp2l2	381695	ENSMUSG00000029655	Sequencing
tarbase	mmu-miR-17-5p	Napb	17957	ENSMUSG00000027438	Sequencing
tarbase	mmu-miR-17-5p	Nbea	26422	ENSMUSG00000027799	Sequencing
tarbase	mmu-miR-17-5p	Nbeal1	269198	ENSMUSG00000073664	Sequencing
tarbase	mmu-miR-17-5p	Ncam1	17967	ENSMUSG00000039542	Sequencing
tarbase	mmu-miR-17-5p	Necab1	69352	ENSMUSG00000040536	Sequencing
tarbase	mmu-miR-17-5p	Nefh	380684	ENSMUSG00000020396	Sequencing
tarbase	mmu-miR-17-5p	Neurod1	18012	ENSMUSG00000034701	Sequencing
tarbase	mmu-miR-17-5p	Nf1	18015	ENSMUSG00000020716	Sequencing
tarbase	mmu-miR-17-5p	Nfe2l2	18024	ENSMUSG00000015839	Sequencing
tarbase	mmu-miR-17-5p	Nfia	18027	ENSMUSG00000028565	Sequencing
tarbase	mmu-miR-17-5p	Nipa2	93790	ENSMUSG00000030452	Sequencing
tarbase	mmu-miR-17-5p	Npat	244879	ENSMUSG00000033054	Sequencing
tarbase	mmu-miR-17-5p	Nptx1	18164	ENSMUSG00000025582	Sequencing
tarbase	mmu-miR-17-5p	Nr1d2	353187	ENSMUSG00000021775	Sequencing
tarbase	mmu-miR-17-5p	Nrip1	268903	ENSMUSG00000048490	Sequencing
tarbase	mmu-miR-17-5p	Nsg2	18197	ENSMUSG00000020297	Sequencing
tarbase	mmu-miR-17-5p	Nt5dc3	103466	ENSMUSG00000054027	Sequencing
tarbase	mmu-miR-17-5p	Nudcd3	209586	ENSMUSG00000053838	Sequencing
tarbase	mmu-miR-17-5p	Nudt18	213484	ENSMUSG00000045211	Sequencing
tarbase	mmu-miR-17-5p	Odz4		ENSMUSG00000048078	Sequencing
tarbase	mmu-miR-17-5p	Ogfod1	270086	ENSMUSG00000033009	Sequencing
tarbase	mmu-miR-17-5p	Oprl1	18389	ENSMUSG00000027584	Sequencing
tarbase	mmu-miR-17-5p	Otud4	73945	ENSMUSG00000036990	Sequencing
tarbase	mmu-miR-17-5p	P140		ENSMUSG00000038453	Sequencing
tarbase	mmu-miR-17-5p	Pabpc5	93728	ENSMUSG00000034732	Sequencing
tarbase	mmu-miR-17-5p	Pank1	75735	ENSMUSG00000033610	Sequencing
tarbase	mmu-miR-17-5p	Papolg	216578	ENSMUSG00000020273	Sequencing
tarbase	mmu-miR-17-5p	Pappa	18491	ENSMUSG00000028370	Sequencing
tarbase	mmu-miR-17-5p	Pbrm1	66923	ENSMUSG00000042323	Sequencing
tarbase	mmu-miR-17-5p	Pcdha5	12936	ENSMUSG00000007440	Sequencing
tarbase	mmu-miR-17-5p	Pcdha5	12942	ENSMUSG00000007440	Sequencing
tarbase	mmu-miR-17-5p	Pcdha5	12943	ENSMUSG00000007440	Sequencing
tarbase	mmu-miR-17-5p	Pcdha5	116731	ENSMUSG00000007440	Sequencing
tarbase	mmu-miR-17-5p	Pcdha5	192161	ENSMUSG00000007440	Sequencing
tarbase	mmu-miR-17-5p	Pcdha5	192164	ENSMUSG00000007440	Sequencing
tarbase	mmu-miR-17-5p	Pcdha5	353234	ENSMUSG00000007440	Sequencing
tarbase	mmu-miR-17-5p	Pcdha5	353236	ENSMUSG00000007440	Sequencing
tarbase	mmu-miR-17-5p	Pcdha5	353237	ENSMUSG00000007440	Sequencing
tarbase	mmu-miR-17-5p	Pcdha6		ENSMUSG00000079714	Sequencing
tarbase	mmu-miR-17-5p	Pcf11	74737	ENSMUSG00000041328	Sequencing
tarbase	mmu-miR-17-5p	Pfn2	18645	ENSMUSG00000027805	Sequencing
tarbase	mmu-miR-17-5p	Pgrmc2	70804	ENSMUSG00000049940	Sequencing
tarbase	mmu-miR-17-5p	Phlpp		ENSMUSG00000044340	Sequencing
tarbase	mmu-miR-17-5p	Pik3r4	75669	ENSMUSG00000032571	Sequencing
tarbase	mmu-miR-17-5p	Pim3	223775	ENSMUSG00000035828	Sequencing
tarbase	mmu-miR-17-5p	Plagl2	54711	ENSMUSG00000051413	Sequencing
tarbase	mmu-miR-17-5p	Plxna2	18845	ENSMUSG00000026640	Sequencing
tarbase	mmu-miR-17-5p	Polq	77782	ENSMUSG00000034206	Sequencing
tarbase	mmu-miR-17-5p	Polr3k	67005	ENSMUSG00000038628	Sequencing
tarbase	mmu-miR-17-5p	Ppap2b	67916	ENSMUSG00000028517	Sequencing
tarbase	mmu-miR-17-5p	Ppig	228005	ENSMUSG00000042133	Sequencing
tarbase	mmu-miR-17-5p	Ppp2r2c	269643	ENSMUSG00000029120	Sequencing
tarbase	mmu-miR-17-5p	Ppp3r1	19058	ENSMUSG00000033953	Sequencing
tarbase	mmu-miR-17-5p	Ppp6c	67857	ENSMUSG00000026753	Sequencing
tarbase	mmu-miR-17-5p	Pten	19211	ENSMUSG00000013663	qRT-PCR//Western blot
tarbase	mmu-miR-17-5p	Ptpn11	19247	ENSMUSG00000043733	Sequencing
tarbase	mmu-miR-17-5p	Ptprg	19270	ENSMUSG00000021745	Sequencing
tarbase	mmu-miR-17-5p	Ptprj	19271	ENSMUSG00000025314	Sequencing
tarbase	mmu-miR-17-5p	Pum1	80912	ENSMUSG00000028580	Sequencing
tarbase	mmu-miR-17-5p	Pvr	52118	ENSMUSG00000040511	Sequencing
tarbase	mmu-miR-17-5p	Qser1	99003	ENSMUSG00000074994	Sequencing
tarbase	mmu-miR-17-5p	Rab11fip4	268451	ENSMUSG00000017639	Sequencing
tarbase	mmu-miR-17-5p	Rab12	19328	ENSMUSG00000023460	Sequencing
tarbase	mmu-miR-17-5p	Rab30	75985	ENSMUSG00000030643	Sequencing
tarbase	mmu-miR-17-5p	Rab33b	19338	ENSMUSG00000027739	Sequencing
tarbase	mmu-miR-17-5p	Rabgap1l	29809	ENSMUSG00000026721	Sequencing
tarbase	mmu-miR-17-5p	Ralgds	19730	ENSMUSG00000026821	Sequencing
tarbase	mmu-miR-17-5p	Ranbp2	19386	ENSMUSG00000003226	Sequencing
tarbase	mmu-miR-17-5p	Rap1gds1	229877	ENSMUSG00000028149	Sequencing
tarbase	mmu-miR-17-5p	Rapgefl1	268480	ENSMUSG00000038020	Sequencing
tarbase	mmu-miR-17-5p	Rasa1	218397	ENSMUSG00000021549	Sequencing
tarbase	mmu-miR-17-5p	Rasal1	19415	ENSMUSG00000029602	Sequencing
tarbase	mmu-miR-17-5p	Rasgef1a	70727	ENSMUSG00000030134	Sequencing
tarbase	mmu-miR-17-5p	Rassf4	213391	ENSMUSG00000042129	Sequencing
tarbase	mmu-miR-17-5p	Rb1	19645	ENSMUSG00000022105	Sequencing
tarbase	mmu-miR-17-5p	Rbl2	19651	ENSMUSG00000031666	Reporter assay
tarbase	mmu-miR-17-5p	Rcan3	53902	ENSMUSG00000059713	Sequencing
tarbase	mmu-miR-17-5p	Rdx	19684	ENSMUSG00000032050	Sequencing
tarbase	mmu-miR-17-5p	Reep1	52250	ENSMUSG00000052852	Sequencing
tarbase	mmu-miR-17-5p	Rev3l	19714	ENSMUSG00000019841	Sequencing
tarbase	mmu-miR-17-5p	Rgma	244058	ENSMUSG00000070509	Sequencing
tarbase	mmu-miR-17-5p	Rnf103	22644	ENSMUSG00000052656	Sequencing
tarbase	mmu-miR-17-5p	Rnf213	672511	ENSMUSG00000070327	Sequencing
tarbase	mmu-miR-17-5p	Rnf220	66743	ENSMUSG00000028677	Sequencing
tarbase	mmu-miR-17-5p	Robo2	268902	ENSMUSG00000052516	Sequencing
tarbase	mmu-miR-17-5p	Rogdi	66049	ENSMUSG00000022540	Sequencing
tarbase	mmu-miR-17-5p	Rora	19883	ENSMUSG00000032238	Sequencing
tarbase	mmu-miR-17-5p	Rsf1	233532	ENSMUSG00000035623	Sequencing
tarbase	mmu-miR-17-5p	Rsrc2	208606	ENSMUSG00000029422	Sequencing
tarbase	mmu-miR-17-5p	Rundc3b	242819	ENSMUSG00000040570	Sequencing
tarbase	mmu-miR-17-5p	Ryr2	20191	ENSMUSG00000021313	Sequencing
tarbase	mmu-miR-17-5p	Sall3	20689	ENSMUSG00000024565	Sequencing
tarbase	mmu-miR-17-5p	Scara5	71145	ENSMUSG00000022032	Sequencing
tarbase	mmu-miR-17-5p	Scn1a	20265	ENSMUSG00000064329	Sequencing
tarbase	mmu-miR-17-5p	Scn2a1	110876	ENSMUSG00000075318	Sequencing
tarbase	mmu-miR-17-5p	Scn3b	235281	ENSMUSG00000049281	Sequencing
tarbase	mmu-miR-17-5p	Scn8a	20273	ENSMUSG00000023033	Sequencing
tarbase	mmu-miR-17-5p	Scp2	20280	ENSMUSG00000028603	Sequencing
tarbase	mmu-miR-17-5p	Sdccag3	68112	ENSMUSG00000026927	Sequencing
tarbase	mmu-miR-17-5p	Sema3c	20348	ENSMUSG00000028780	Sequencing
tarbase	mmu-miR-17-5p	Sepp1		ENSMUSG00000064373	Sequencing
tarbase	mmu-miR-17-5p	Serinc1	56442	ENSMUSG00000019877	Sequencing
tarbase	mmu-miR-17-5p	Serpinb9	20723	ENSMUSG00000045827	Sequencing
tarbase	mmu-miR-17-5p	Sez6l	56747	ENSMUSG00000058153	Sequencing
tarbase	mmu-miR-17-5p	Sh3bgrl	56726	ENSMUSG00000031246	Sequencing
tarbase	mmu-miR-17-5p	Sh3d19	27059	ENSMUSG00000028082	Sequencing
tarbase	mmu-miR-17-5p	Shh	20423	ENSMUSG00000002633	Sequencing
tarbase	mmu-miR-17-5p	Ski	20481	ENSMUSG00000029050	Sequencing
tarbase	mmu-miR-17-5p	Skil	20482	ENSMUSG00000027660	Sequencing
tarbase	mmu-miR-17-5p	Slc10a7	76775	ENSMUSG00000031684	Sequencing
tarbase	mmu-miR-17-5p	Slc17a7	72961	ENSMUSG00000070570	Sequencing
tarbase	mmu-miR-17-5p	Slc1a4	55963	ENSMUSG00000020142	Sequencing
tarbase	mmu-miR-17-5p	Slc24a2	76376	ENSMUSG00000037996	Sequencing
tarbase	mmu-miR-17-5p	Slc35f3	210027	ENSMUSG00000057060	Sequencing
tarbase	mmu-miR-17-5p	Slc36a1	215335	ENSMUSG00000020261	Sequencing
tarbase	mmu-miR-17-5p	Slc44a5	242259	ENSMUSG00000028360	Sequencing
tarbase	mmu-miR-17-5p	Slc7a14	241919	ENSMUSG00000069072	Sequencing
tarbase	mmu-miR-17-5p	Slc7a2	11988	ENSMUSG00000031596	Sequencing
tarbase	mmu-miR-17-5p	Slc8a1	20541	ENSMUSG00000054640	Sequencing
tarbase	mmu-miR-17-5p	Smoc2	64074	ENSMUSG00000023886	Sequencing
tarbase	mmu-miR-17-5p	Sobp	109205	ENSMUSG00000038248	Sequencing
tarbase	mmu-miR-17-5p	Socs6	54607	ENSMUSG00000056153	Sequencing
tarbase	mmu-miR-17-5p	Sox8	20681	ENSMUSG00000024176	Sequencing
tarbase	mmu-miR-17-5p	Spag9	70834	ENSMUSG00000020859	Sequencing
tarbase	mmu-miR-17-5p	Spast	50850	ENSMUSG00000024068	Sequencing
tarbase	mmu-miR-17-5p	St6galnac5	26938	ENSMUSG00000039037	Sequencing
tarbase	mmu-miR-17-5p	Stat3	20848	ENSMUSG00000004040	Reporter assay//qRT-PCR//Western blot//Other
tarbase	mmu-miR-17-5p	Stxbp5	78808	ENSMUSG00000019790	Sequencing
tarbase	mmu-miR-17-5p	Syt1	20979	ENSMUSG00000035864	Sequencing
tarbase	mmu-miR-17-5p	Syt11	229521	ENSMUSG00000068923	Sequencing
tarbase	mmu-miR-17-5p	Taok1	216965	ENSMUSG00000017291	Sequencing
tarbase	mmu-miR-17-5p	Taok2	381921	ENSMUSG00000059981	Sequencing
tarbase	mmu-miR-17-5p	Tbc1d12	209478	ENSMUSG00000048720	Sequencing
tarbase	mmu-miR-17-5p	Tbc1d8b	245638	ENSMUSG00000042473	Sequencing
tarbase	mmu-miR-17-5p	Tceb3	27224	ENSMUSG00000028668	Sequencing
tarbase	mmu-miR-17-5p	Tcfe3		ENSMUSG00000000134	Sequencing
tarbase	mmu-miR-17-5p	Tex2	21763	ENSMUSG00000040548	Sequencing
tarbase	mmu-miR-17-5p	Tgfa	21802	ENSMUSG00000029999	Sequencing
tarbase	mmu-miR-17-5p	Tmcc1	330401	ENSMUSG00000030126	Sequencing
tarbase	mmu-miR-17-5p	Tmed8	382620	ENSMUSG00000034111	Sequencing
tarbase	mmu-miR-17-5p	Tmem64	100201	ENSMUSG00000043252	Sequencing
tarbase	mmu-miR-17-5p	Tmod2	50876	ENSMUSG00000032186	Sequencing
tarbase	mmu-miR-17-5p	Tnfrsf21	94185	ENSMUSG00000023915	Sequencing
tarbase	mmu-miR-17-5p	Tnks	21951	ENSMUSG00000031529	Sequencing
tarbase	mmu-miR-17-5p	Tnrc6b	213988	ENSMUSG00000047888	Sequencing
tarbase	mmu-miR-17-5p	Tomm34	67145	ENSMUSG00000018322	Sequencing
tarbase	mmu-miR-17-5p	Tor1aip2	240832	ENSMUSG00000050565	Sequencing
tarbase	mmu-miR-17-5p	Trim2	80890	ENSMUSG00000027993	Sequencing
tarbase	mmu-miR-17-5p	Trip12	14897	ENSMUSG00000026219	Sequencing
tarbase	mmu-miR-17-5p	Tspan9	109246	ENSMUSG00000030352	Sequencing
tarbase	mmu-miR-17-5p	Ttc14	67120	ENSMUSG00000027677	Sequencing
tarbase	mmu-miR-17-5p	Ttc9	69480	ENSMUSG00000042734	Sequencing
tarbase	mmu-miR-17-5p	Txndc13		ENSMUSG00000034723	Sequencing
tarbase	mmu-miR-17-5p	Ubr3	68795	ENSMUSG00000044308	Sequencing
tarbase	mmu-miR-17-5p	Ubtf	21429	ENSMUSG00000020923	Sequencing
tarbase	mmu-miR-17-5p	Ubxn2a	217379	ENSMUSG00000020634	Sequencing
tarbase	mmu-miR-17-5p	Ugcg	22234	ENSMUSG00000028381	Sequencing
tarbase	mmu-miR-17-5p	Usp3	235441	ENSMUSG00000032376	Sequencing
tarbase	mmu-miR-17-5p	Wdr37	207615	ENSMUSG00000021147	Sequencing
tarbase	mmu-miR-17-5p	Wdr82	77305	ENSMUSG00000020257	Sequencing
tarbase	mmu-miR-17-5p	Wfs1	22393	ENSMUSG00000039474	Sequencing
tarbase	mmu-miR-17-5p	Whsc1l1	234135	ENSMUSG00000054823	Sequencing
tarbase	mmu-miR-17-5p	Wnk1	232341	ENSMUSG00000045962	Sequencing
tarbase	mmu-miR-17-5p	X99384		ENSMUSG00000020092	Sequencing
tarbase	mmu-miR-17-5p	Xpc	22591	ENSMUSG00000030094	Sequencing
tarbase	mmu-miR-17-5p	Xrn1	24127	ENSMUSG00000032410	Sequencing
tarbase	mmu-miR-17-5p	Yipf6	77929	ENSMUSG00000047694	Sequencing
tarbase	mmu-miR-17-5p	Ythdf3	229096	ENSMUSG00000047213	Sequencing
tarbase	mmu-miR-17-5p	Yy1	22632	ENSMUSG00000021264	Sequencing
tarbase	mmu-miR-17-5p	Zdhhc16	74168	ENSMUSG00000025157	Sequencing
tarbase	mmu-miR-17-5p	Zeb2	24136	ENSMUSG00000026872	Sequencing
tarbase	mmu-miR-17-5p	Zfhx3	11906	ENSMUSG00000038872	Sequencing
tarbase	mmu-miR-17-5p	Zfp217	228913	ENSMUSG00000052056	Sequencing
tarbase	mmu-miR-17-5p	Zfp317	244713	ENSMUSG00000057551	Sequencing
tarbase	mmu-miR-17-5p	Zfp367	238673	ENSMUSG00000044934	Sequencing
tarbase	mmu-miR-17-5p	Zfp597	71063	ENSMUSG00000039789	Sequencing
tarbase	mmu-miR-17-5p	Zfp62	22720	ENSMUSG00000046311	Sequencing
tarbase	mmu-miR-17-5p	Zfp652	268469	ENSMUSG00000075595	Sequencing
tarbase	mmu-miR-17-5p	Zfp704	170753	ENSMUSG00000040209	Sequencing
tarbase	mmu-miR-17-5p	Zfp84	74352	ENSMUSG00000046185	Sequencing
tarbase	mmu-miR-17-5p	Zhx3	320799	ENSMUSG00000035877	Sequencing
tarbase	mmu-miR-17-5p	Zic2	22772	ENSMUSG00000061524	Sequencing
tarbase	mmu-miR-17-5p	Zmat3	22401	ENSMUSG00000027663	Sequencing
tarbase	mmu-miR-17-5p	Znfx1	98999	ENSMUSG00000039501	Sequencing

## Sheet: mmu-miR-20a-5p
database	mature_mirna_id	target_symbol	target_entrez	target_ensembl	experiment	pubmed_id
mirecords	mmu-miR-20a-5p	Zbtb7a	16969	ENSMUSG00000035011	Western blot	18596985
mirecords	mmu-miR-20a-5p	Stat3	20848	ENSMUSG00000004040	Western blot	19073166
mirtarbase	mmu-miR-20a-5p	App	11820	ENSMUSG00000022892	Luciferase reporter assay	20619502
mirtarbase	mmu-miR-20a-5p	Bmp4	12159	ENSMUSG00000021835	qRT-PCR	19559694
mirtarbase	mmu-miR-20a-5p	Zbtb7a	16969	ENSMUSG00000035011	GFP reporter assay//Northern blot//qRT-PCR//Western blot	18596985
mirtarbase	mmu-miR-20a-5p	Pten	19211	ENSMUSG00000013663	Western blot;qRT-PCR	20008935
mirtarbase	mmu-miR-20a-5p	Stat3	20848	ENSMUSG00000004040	qRT-PCR//Luciferase reporter assay//Western blot	19073166
mirtarbase	mmu-miR-20a-5p	Stat3	20848	ENSMUSG00000004040	immunoblot//immunocytochemistry//Luciferase reporter assay//qRT-PCR//Reporter assay;Western blot;qRT-PCR;Other	19559694
mirtarbase	mmu-miR-20a-5p	Mapk14	26416	ENSMUSG00000053436	immunoblot//immunocytochemistry//Luciferase reporter assay//qRT-PCR//Reporter assay;Western blot;qRT-PCR;Other	19559694
tarbase	mmu-miR-20a-5p	beta-catenin			Other
tarbase	mmu-miR-20a-5p	Bmp4	12159	ENSMUSG00000021835	qRT-PCR
tarbase	mmu-miR-20a-5p	E-Cadherinl			qRT-PCR
tarbase	mmu-miR-20a-5p	Fgfr2b			qRT-PCR
tarbase	mmu-miR-20a-5p	Mapk14	26416	ENSMUSG00000053436	Reporter assay//qRT-PCR//Western blot//Other
tarbase	mmu-miR-20a-5p	Pten	19211	ENSMUSG00000013663	qRT-PCR//Western blot
tarbase	mmu-miR-20a-5p	Stat3	20848	ENSMUSG00000004040	Reporter assay//qRT-PCR//Western blot//Other

## Sheet: mmu-miR-26a-5p
database	mature_mirna_id	target_symbol	target_entrez	target_ensembl	experiment	pubmed_id
mirecords	mmu-miR-26a-5p	Ezh2	14056	ENSMUSG00000029687	Western blot	18281287
mirtarbase	mmu-miR-26a-5p	Abca1	11303	ENSMUSG00000015243	Sequencing	19536157
mirtarbase	mmu-miR-26a-5p	Macf1	11426	ENSMUSG00000028649	Sequencing	19536157
mirtarbase	mmu-miR-26a-5p	Apc	11789	ENSMUSG00000005871	Sequencing	19536157
mirtarbase	mmu-miR-26a-5p	Arf1	11840	ENSMUSG00000048076	Sequencing	19536157
mirtarbase	mmu-miR-26a-5p	Arnt	11863	ENSMUSG00000015522	Sequencing	19536157
mirtarbase	mmu-miR-26a-5p	Arsb	11881	ENSMUSG00000042082	Sequencing	19536157
mirtarbase	mmu-miR-26a-5p	Slc7a1	11987	ENSMUSG00000041313	Sequencing	19536157
mirtarbase	mmu-miR-26a-5p	Bcl6	12053	ENSMUSG00000022508	Sequencing	19536157
mirtarbase	mmu-miR-26a-5p	Bcl7c	12055	ENSMUSG00000030814	Sequencing	19536157
mirtarbase	mmu-miR-26a-5p	Glb1	12091	ENSMUSG00000045594	Sequencing	19536157
mirtarbase	mmu-miR-26a-5p	Bmpr1a	12166	ENSMUSG00000021796	Sequencing	19536157
mirtarbase	mmu-miR-26a-5p	Bnip2	12175	ENSMUSG00000011958	Sequencing	19536157
mirtarbase	mmu-miR-26a-5p	Cbx5	12419	ENSMUSG00000009575	Sequencing	19536157
mirtarbase	mmu-miR-26a-5p	Clk1	12747	ENSMUSG00000026034	Sequencing	19536157
mirtarbase	mmu-miR-26a-5p	Cplx2	12890	ENSMUSG00000025867	Sequencing	19536157
mirtarbase	mmu-miR-26a-5p	Cs	12974	ENSMUSG00000005683	Sequencing	19536157
mirtarbase	mmu-miR-26a-5p	Ncan	13004	ENSMUSG00000002341	Sequencing	19536157
mirtarbase	mmu-miR-26a-5p	Ctsl	13039	ENSMUSG00000021477	Sequencing	19536157
mirtarbase	mmu-miR-26a-5p	Celf1	13046	ENSMUSG00000005506	Sequencing	19536157
mirtarbase	mmu-miR-26a-5p	Cyp51	13121	ENSMUSG00000001467	Sequencing	19536157
mirtarbase	mmu-miR-26a-5p	Dab1	13131	ENSMUSG00000028519	Sequencing	19536157
mirtarbase	mmu-miR-26a-5p	Degs1	13244	ENSMUSG00000038633	Sequencing	19536157
mirtarbase	mmu-miR-26a-5p	Dhcr7	13360	ENSMUSG00000058454	Sequencing	19536157
mirtarbase	mmu-miR-26a-5p	Dll1	13388	ENSMUSG00000014773	Sequencing	19536157
mirtarbase	mmu-miR-26a-5p	Dnm1	13429	ENSMUSG00000026825	Sequencing	19536157
mirtarbase	mmu-miR-26a-5p	Egr1	13653	ENSMUSG00000038418	Sequencing	19536157
mirtarbase	mmu-miR-26a-5p	Ephb2	13844	ENSMUSG00000028664	Sequencing	19536157
mirtarbase	mmu-miR-26a-5p	Eps15	13858	ENSMUSG00000028552	Sequencing	19536157
mirtarbase	mmu-miR-26a-5p	Eps8	13860	ENSMUSG00000015766	Sequencing	19536157
mirtarbase	mmu-miR-26a-5p	Ezh2	14056	ENSMUSG00000029687	qRT-PCR//Western blot//Reporter assay;Western blot;qRT-PCR;Other	18281287
mirtarbase	mmu-miR-26a-5p	Fem1b	14155	ENSMUSG00000032244	Sequencing	19536157
mirtarbase	mmu-miR-26a-5p	Fkbp1a	14225	ENSMUSG00000032966	Sequencing	19536157
mirtarbase	mmu-miR-26a-5p	Fkbp1b	14226	ENSMUSG00000020635	Sequencing	19536157
mirtarbase	mmu-miR-26a-5p	Gabrg3	14407	ENSMUSG00000055026	Sequencing	19536157
mirtarbase	mmu-miR-26a-5p	Gcnt1	14537	ENSMUSG00000038843	Sequencing	19536157
mirtarbase	mmu-miR-26a-5p	Glrb	14658	ENSMUSG00000028020	Sequencing	19536157
mirtarbase	mmu-miR-26a-5p	Gnao1	14681	ENSMUSG00000031748	Sequencing	19536157
mirtarbase	mmu-miR-26a-5p	Gnaq	14682	ENSMUSG00000024639	Sequencing	19536157
mirtarbase	mmu-miR-26a-5p	Gnb4	14696	ENSMUSG00000027669	Sequencing	19536157
mirtarbase	mmu-miR-26a-5p	Gng12	14701	ENSMUSG00000036402	Sequencing	19536157
mirtarbase	mmu-miR-26a-5p	Gpam	14732	ENSMUSG00000024978	Sequencing	19536157
mirtarbase	mmu-miR-26a-5p	Gsr	14782	ENSMUSG00000031584	Sequencing	19536157
mirtarbase	mmu-miR-26a-5p	Gria2	14800	ENSMUSG00000033981	Sequencing	19536157
mirtarbase	mmu-miR-26a-5p	Gria4	14802	ENSMUSG00000025892	Sequencing	19536157
mirtarbase	mmu-miR-26a-5p	Hipk1	15257	ENSMUSG00000008730	Sequencing	19536157
mirtarbase	mmu-miR-26a-5p	Hp1bp3	15441	ENSMUSG00000028759	Sequencing	19536157
mirtarbase	mmu-miR-26a-5p	Hsd11b1	15483	ENSMUSG00000016194	Sequencing	19536157
mirtarbase	mmu-miR-26a-5p	Sdc2	15529	ENSMUSG00000022261	Sequencing	19536157
mirtarbase	mmu-miR-26a-5p	Elavl2	15569	ENSMUSG00000008489	Sequencing	19536157
mirtarbase	mmu-miR-26a-5p	Kpnb1	16211	ENSMUSG00000001440	Sequencing	19536157
mirtarbase	mmu-miR-26a-5p	Itgb1	16412	ENSMUSG00000025809	Sequencing	19536157
mirtarbase	mmu-miR-26a-5p	Jarid2	16468	ENSMUSG00000038518	Sequencing	19536157
mirtarbase	mmu-miR-26a-5p	Kcnh1	16510	ENSMUSG00000058248	Sequencing	19536157
mirtarbase	mmu-miR-26a-5p	Kcnj2	16518	ENSMUSG00000041695	Sequencing	19536157
mirtarbase	mmu-miR-26a-5p	Kcnk1	16525	ENSMUSG00000033998	Sequencing	19536157
mirtarbase	mmu-miR-26a-5p	Kif3b	16569	ENSMUSG00000027475	Sequencing	19536157
mirtarbase	mmu-miR-26a-5p	Kpna4	16649	ENSMUSG00000027782	Sequencing	19536157
mirtarbase	mmu-miR-26a-5p	L1cam	16728	ENSMUSG00000031391	Sequencing	19536157
mirtarbase	mmu-miR-26a-5p	Lrrn3	16981	ENSMUSG00000036295	Sequencing	19536157
mirtarbase	mmu-miR-26a-5p	Cd93	17064	ENSMUSG00000027435	Sequencing	19536157
mirtarbase	mmu-miR-26a-5p	Mef2c	17260	ENSMUSG00000005583	Sequencing	19536157
mirtarbase	mmu-miR-26a-5p	Kitl	17311	ENSMUSG00000019966	Sequencing	19536157
mirtarbase	mmu-miR-26a-5p	Marcksl1	17357	ENSMUSG00000047945	Sequencing	19536157
mirtarbase	mmu-miR-26a-5p	Mmp16	17389	ENSMUSG00000028226	Sequencing	19536157
mirtarbase	mmu-miR-26a-5p	Map1a	17754	ENSMUSG00000027254	Sequencing	19536157
mirtarbase	mmu-miR-26a-5p	Map2	17756	ENSMUSG00000015222	Sequencing	19536157
mirtarbase	mmu-miR-26a-5p	Laptm4a	17775	ENSMUSG00000020585	Sequencing	19536157
mirtarbase	mmu-miR-26a-5p	Sept2	18000	ENSMUSG00000026276	Sequencing	19536157
mirtarbase	mmu-miR-26a-5p	Nfix	18032	ENSMUSG00000001911	Sequencing	19536157
mirtarbase	mmu-miR-26a-5p	Pcmt1	18537	ENSMUSG00000019795	Sequencing	19536157
mirtarbase	mmu-miR-26a-5p	Pgr	18667	ENSMUSG00000031870	Sequencing	19536157
mirtarbase	mmu-miR-26a-5p	Pik3r3	18710	ENSMUSG00000028698	Sequencing	19536157
mirtarbase	mmu-miR-26a-5p	Plp1	18823	ENSMUSG00000031425	Sequencing	19536157
mirtarbase	mmu-miR-26a-5p	Polb	18970	ENSMUSG00000031536	Sequencing	19536157
mirtarbase	mmu-miR-26a-5p	Ppp3r1	19058	ENSMUSG00000033953	Sequencing	19536157
mirtarbase	mmu-miR-26a-5p	Ptprd	19266	ENSMUSG00000028399	Sequencing	19536157
mirtarbase	mmu-miR-26a-5p	Ptprg	19270	ENSMUSG00000021745	Sequencing	19536157
mirtarbase	mmu-miR-26a-5p	Qk	19317	ENSMUSG00000062078	Sequencing	19536157
mirtarbase	mmu-miR-26a-5p	Serpinf1	20317	ENSMUSG00000000753	Sequencing	19536157
mirtarbase	mmu-miR-26a-5p	Sema6a	20358	ENSMUSG00000019647	Sequencing	19536157
mirtarbase	mmu-miR-26a-5p	Itsn2	20403	ENSMUSG00000020640	Sequencing	19536157
mirtarbase	mmu-miR-26a-5p	St8sia4	20452	ENSMUSG00000040710	Sequencing	19536157
mirtarbase	mmu-miR-26a-5p	Slc16a7	20503	ENSMUSG00000020102	Sequencing	19536157
mirtarbase	mmu-miR-26a-5p	Slc1a1	20510	ENSMUSG00000024935	Sequencing	19536157
mirtarbase	mmu-miR-26a-5p	Sst	20604	ENSMUSG00000004366	Sequencing	19536157
mirtarbase	mmu-miR-26a-5p	Sos1	20662	ENSMUSG00000024241	Sequencing	19536157
mirtarbase	mmu-miR-26a-5p	Sox6	20679	ENSMUSG00000051910	Sequencing	19536157
mirtarbase	mmu-miR-26a-5p	Strbp	20744	ENSMUSG00000026915	Sequencing	19536157
mirtarbase	mmu-miR-26a-5p	Srprb	20818	ENSMUSG00000032553	Sequencing	19536157
mirtarbase	mmu-miR-26a-5p	Gm20425	20818	ENSMUSG00000090639	Sequencing	19536157
mirtarbase	mmu-miR-26a-5p	Stag1	20842	ENSMUSG00000037286	Sequencing	19536157
mirtarbase	mmu-miR-26a-5p	Syt2	20980	ENSMUSG00000026452	Sequencing	19536157
mirtarbase	mmu-miR-26a-5p	Tbr1	21375	ENSMUSG00000035033	Sequencing	19536157
mirtarbase	mmu-miR-26a-5p	Tcf4	21413	ENSMUSG00000053477	Sequencing	19536157
mirtarbase	mmu-miR-26a-5p	Tmod1	21916	ENSMUSG00000028328	Sequencing	19536157
mirtarbase	mmu-miR-26a-5p	Tpd52	21985	ENSMUSG00000027506	Sequencing	19536157
mirtarbase	mmu-miR-26a-5p	Tob1	22057	ENSMUSG00000037573	Sequencing	19536157
mirtarbase	mmu-miR-26a-5p	Trpc3	22065	ENSMUSG00000027716	Sequencing	19536157
mirtarbase	mmu-miR-26a-5p	Tulp3	22158	ENSMUSG00000001521	Sequencing	19536157
mirtarbase	mmu-miR-26a-5p	Ube2l3	22195	ENSMUSG00000038965	Sequencing	19536157
mirtarbase	mmu-miR-26a-5p	Ulk1	22241	ENSMUSG00000029512	Sequencing	19536157
mirtarbase	mmu-miR-26a-5p	Vbp1	22327	ENSMUSG00000031197	Sequencing	19536157
mirtarbase	mmu-miR-26a-5p	Nrsn1	22360	ENSMUSG00000048978	Sequencing	19536157
mirtarbase	mmu-miR-26a-5p	Ywhae	22627	ENSMUSG00000020849	Sequencing	19536157
mirtarbase	mmu-miR-26a-5p	Zfp40	22700	ENSMUSG00000002617	Sequencing	19536157
mirtarbase	mmu-miR-26a-5p	Zic2	22772	ENSMUSG00000061524	Sequencing	19536157
mirtarbase	mmu-miR-26a-5p	Zik1	22775	ENSMUSG00000030393	Sequencing	19536157
mirtarbase	mmu-miR-26a-5p	Slc30a1	22782	ENSMUSG00000037434	Sequencing	19536157
mirtarbase	mmu-miR-26a-5p	Capn10	23830	ENSMUSG00000026270	Sequencing	19536157
mirtarbase	mmu-miR-26a-5p	Dlg2	23859	ENSMUSG00000052572	Sequencing	19536157
mirtarbase	mmu-miR-26a-5p	Scamp3	24045	ENSMUSG00000028049	Sequencing	19536157
mirtarbase	mmu-miR-26a-5p	Zeb2	24136	ENSMUSG00000026872	Sequencing	19536157
mirtarbase	mmu-miR-26a-5p	Map2k4	26398	ENSMUSG00000033352	Sequencing	19536157
mirtarbase	mmu-miR-26a-5p	Mapk9	26420	ENSMUSG00000020366	Sequencing	19536157
mirtarbase	mmu-miR-26a-5p	Homer1	26556	ENSMUSG00000007617	Sequencing	19536157
mirtarbase	mmu-miR-26a-5p	Ddx3y	26900	ENSMUSG00000069045	Sequencing	19536157
mirtarbase	mmu-miR-26a-5p	Eif2s3y	26908	ENSMUSG00000069049	Sequencing	19536157
mirtarbase	mmu-miR-26a-5p	Serinc3	26943	ENSMUSG00000017707	Sequencing	19536157
mirtarbase	mmu-miR-26a-5p	Sh3d19	27059	ENSMUSG00000028082	Sequencing	19536157
mirtarbase	mmu-miR-26a-5p	Amot	27494	ENSMUSG00000041688	Sequencing	19536157
mirtarbase	mmu-miR-26a-5p	Agpat3	28169	ENSMUSG00000001211	Sequencing	19536157
mirtarbase	mmu-miR-26a-5p	Mlf2	30853	ENSMUSG00000030120	Sequencing	19536157
mirtarbase	mmu-miR-26a-5p	Vps26a	30930	ENSMUSG00000020078	Sequencing	19536157
mirtarbase	mmu-miR-26a-5p	Usp25	30940	ENSMUSG00000022867	Sequencing	19536157
mirtarbase	mmu-miR-26a-5p	Klf13	50794	ENSMUSG00000052040	Sequencing	19536157
mirtarbase	mmu-miR-26a-5p	Gne	50798	ENSMUSG00000028479	Sequencing	19536157
mirtarbase	mmu-miR-26a-5p	Spast	50850	ENSMUSG00000024068	Sequencing	19536157
mirtarbase	mmu-miR-26a-5p	Tmod2	50876	ENSMUSG00000032186	Sequencing	19536157
mirtarbase	mmu-miR-26a-5p	Cpsf2	51786	ENSMUSG00000041781	Sequencing	19536157
mirtarbase	mmu-miR-26a-5p	Ccnc	51813	ENSMUSG00000028252	Sequencing	19536157
mirtarbase	mmu-miR-26a-5p	Fubp1	51886	ENSMUSG00000028034	Sequencing	19536157
mirtarbase	mmu-miR-26a-5p	Rragd	52187	ENSMUSG00000028278	Sequencing	19536157
mirtarbase	mmu-miR-26a-5p	Vps37a	52348	ENSMUSG00000031600	Sequencing	19536157
mirtarbase	mmu-miR-26a-5p	Ctdsp2	52468	ENSMUSG00000078429	Sequencing	19536157
mirtarbase	mmu-miR-26a-5p	Ube2k	53323	ENSMUSG00000029203	Sequencing	19536157
mirtarbase	mmu-miR-26a-5p	Mtmr1	53332	ENSMUSG00000015214	Sequencing	19536157
mirtarbase	mmu-miR-26a-5p	Tomm40	53333	ENSMUSG00000002984	Sequencing	19536157
mirtarbase	mmu-miR-26a-5p	Mtx2	53375	ENSMUSG00000027099	Sequencing	19536157
mirtarbase	mmu-miR-26a-5p	Stk39	53416	ENSMUSG00000027030	Sequencing	19536157
mirtarbase	mmu-miR-26a-5p	Zranb2	53861	ENSMUSG00000028180	Sequencing	19536157
mirtarbase	mmu-miR-26a-5p	Celsr2	53883	ENSMUSG00000068740	Sequencing	19536157
mirtarbase	mmu-miR-26a-5p	Rragc	54170	ENSMUSG00000028646	Sequencing	19536157
mirtarbase	mmu-miR-26a-5p	Slc23a2	54338	ENSMUSG00000027340	Sequencing	19536157
mirtarbase	mmu-miR-26a-5p	Atp6ap1	54411	ENSMUSG00000019087	Sequencing	19536157
mirtarbase	mmu-miR-26a-5p	Fmn2	54418	ENSMUSG00000028354	Sequencing	19536157
mirtarbase	mmu-miR-26a-5p	Pcnx	54604	ENSMUSG00000021140	Sequencing	19536157
mirtarbase	mmu-miR-26a-5p	Socs6	54607	ENSMUSG00000056153	Sequencing	19536157
mirtarbase	mmu-miR-26a-5p	Srcin1	56013	ENSMUSG00000038453	Sequencing	19536157
mirtarbase	mmu-miR-26a-5p	Patz1	56218	ENSMUSG00000020453	Sequencing	19536157
mirtarbase	mmu-miR-26a-5p	Chp1	56398	ENSMUSG00000014077	Sequencing	19536157
mirtarbase	mmu-miR-26a-5p	Serinc1	56442	ENSMUSG00000019877	Sequencing	19536157
mirtarbase	mmu-miR-26a-5p	Rnf138	56515	ENSMUSG00000024317	Sequencing	19536157
mirtarbase	mmu-miR-26a-5p	0610031J06Rik	56700	ENSMUSG00000001418	Sequencing	19536157
mirtarbase	mmu-miR-26a-5p	Alg2	56737	ENSMUSG00000039740	Sequencing	19536157
mirtarbase	mmu-miR-26a-5p	Igdcc4	56741	ENSMUSG00000032816	Sequencing	19536157
mirtarbase	mmu-miR-26a-5p	Mllt11	56772	ENSMUSG00000053192	Sequencing	19536157
mirtarbase	mmu-miR-26a-5p	Scamp5	56807	ENSMUSG00000040722	Sequencing	19536157
mirtarbase	mmu-miR-26a-5p	Sall1	58198	ENSMUSG00000031665	Sequencing	19536157
mirtarbase	mmu-miR-26a-5p	Nudt11	58242	ENSMUSG00000073295	Sequencing	19536157
mirtarbase	mmu-miR-26a-5p	Nudt10	58242	ENSMUSG00000073293	Sequencing	19536157
mirtarbase	mmu-miR-26a-5p	Huwe1	59026	ENSMUSG00000025261	Sequencing	19536157
mirtarbase	mmu-miR-26a-5p	Slc4a8	59033	ENSMUSG00000023032	Sequencing	19536157
mirtarbase	mmu-miR-26a-5p	Arpp19	59046	ENSMUSG00000007656	Sequencing	19536157
mirtarbase	mmu-miR-26a-5p	Trp53inp1	60599	ENSMUSG00000028211	Sequencing	19536157
mirtarbase	mmu-miR-26a-5p	Dip2a	64451	ENSMUSG00000020231	Sequencing	19536157
mirtarbase	mmu-miR-26a-5p	Asb1	65247	ENSMUSG00000026311	Sequencing	19536157
mirtarbase	mmu-miR-26a-5p	Knop1	66356	ENSMUSG00000030980	Sequencing	19536157
mirtarbase	mmu-miR-26a-5p	Kdelr2	66913	ENSMUSG00000079111	Sequencing	19536157
mirtarbase	mmu-miR-26a-5p	Zdhhc6	66980	ENSMUSG00000024982	Sequencing	19536157
mirtarbase	mmu-miR-26a-5p	Fam210b	67017	ENSMUSG00000027495	Sequencing	19536157
mirtarbase	mmu-miR-26a-5p	2610002M06Rik	67028	ENSMUSG00000031242	Sequencing	19536157
mirtarbase	mmu-miR-26a-5p	Trak1	67095	ENSMUSG00000032536	Sequencing	19536157
mirtarbase	mmu-miR-26a-5p	Ttc14	67120	ENSMUSG00000027677	Sequencing	19536157
mirtarbase	mmu-miR-26a-5p	Nrarp	67122	ENSMUSG00000078202	Sequencing	19536157
mirtarbase	mmu-miR-26a-5p	Rnf141	67150	ENSMUSG00000030788	Sequencing	19536157
mirtarbase	mmu-miR-26a-5p	Nts	67405	ENSMUSG00000019890	Sequencing	19536157
mirtarbase	mmu-miR-26a-5p	Armcx2	67416	ENSMUSG00000033436	Sequencing	19536157
mirtarbase	mmu-miR-26a-5p	Slc25a46	67453	ENSMUSG00000024259	Sequencing	19536157
mirtarbase	mmu-miR-26a-5p	Ero1lb	67475	ENSMUSG00000057069	Sequencing	19536157
mirtarbase	mmu-miR-26a-5p	Gpr89	67549	ENSMUSG00000028096	Sequencing	19536157
mirtarbase	mmu-miR-26a-5p	Pigm	67556	ENSMUSG00000050229	Sequencing	19536157
mirtarbase	mmu-miR-26a-5p	Mrfap1	67568	ENSMUSG00000055302	Sequencing	19536157
mirtarbase	mmu-miR-26a-5p	Tbc1d23	67581	ENSMUSG00000022749	Sequencing	19536157
mirtarbase	mmu-miR-26a-5p	Slc38a2	67760	ENSMUSG00000022462	Sequencing	19536157
mirtarbase	mmu-miR-26a-5p	Jagn1	67767	ENSMUSG00000051256	Sequencing	19536157
mirtarbase	mmu-miR-26a-5p	Zmym4	67785	ENSMUSG00000042446	Sequencing	19536157
mirtarbase	mmu-miR-26a-5p	Mesdc2	67943	ENSMUSG00000038503	Sequencing	19536157
mirtarbase	mmu-miR-26a-5p	Nacc2	67991	ENSMUSG00000026932	Sequencing	19536157
mirtarbase	mmu-miR-26a-5p	Diras2	68203	ENSMUSG00000047842	Sequencing	19536157
mirtarbase	mmu-miR-26a-5p	Lmbrd1	68421	ENSMUSG00000073725	Sequencing	19536157
mirtarbase	mmu-miR-26a-5p	Adipor2	68465	ENSMUSG00000030168	Sequencing	19536157
mirtarbase	mmu-miR-26a-5p	Mob1b	68473	ENSMUSG00000006262	Sequencing	19536157
mirtarbase	mmu-miR-26a-5p	Tab2	68652	ENSMUSG00000015755	Sequencing	19536157
mirtarbase	mmu-miR-26a-5p	Ubr3	68795	ENSMUSG00000044308	Sequencing	19536157
mirtarbase	mmu-miR-26a-5p	Foxk2	68837	ENSMUSG00000039275	Sequencing	19536157
mirtarbase	mmu-miR-26a-5p	Cdk13	69562	ENSMUSG00000041297	Sequencing	19536157
mirtarbase	mmu-miR-26a-5p	Scrn1	69938	ENSMUSG00000019124	Sequencing	19536157
mirtarbase	mmu-miR-26a-5p	Tmem30a	69981	ENSMUSG00000032328	Sequencing	19536157
mirtarbase	mmu-miR-26a-5p	Ube2q1	70093	ENSMUSG00000042572	Sequencing	19536157
mirtarbase	mmu-miR-26a-5p	Lman1	70361	ENSMUSG00000041891	Sequencing	19536157
mirtarbase	mmu-miR-26a-5p	Atad2	70472	ENSMUSG00000022360	Sequencing	19536157
mirtarbase	mmu-miR-26a-5p	Ssfa2	70599	ENSMUSG00000027007	Sequencing	19536157
mirtarbase	mmu-miR-26a-5p	Tspan2	70747	ENSMUSG00000027858	Sequencing	19536157
mirtarbase	mmu-miR-26a-5p	Pgrmc2	70804	ENSMUSG00000049940	Sequencing	19536157
mirtarbase	mmu-miR-26a-5p	Phf6	70998	ENSMUSG00000025626	Sequencing	19536157
mirtarbase	mmu-miR-26a-5p	Otud1	71198	ENSMUSG00000043415	Sequencing	19536157
mirtarbase	mmu-miR-26a-5p	Dlg5	71228	ENSMUSG00000021782	Sequencing	19536157
mirtarbase	mmu-miR-26a-5p	4930506M07Rik	71653	ENSMUSG00000041362	Sequencing	19536157
mirtarbase	mmu-miR-26a-5p	Plbd2	71772	ENSMUSG00000029598	Sequencing	19536157
mirtarbase	mmu-miR-26a-5p	Klhl5	71778	ENSMUSG00000054920	Sequencing	19536157
mirtarbase	mmu-miR-26a-5p	Sapcd2	72080	ENSMUSG00000026955	Sequencing	19536157
mirtarbase	mmu-miR-26a-5p	Ddhd2	72108	ENSMUSG00000061313	Sequencing	19536157
mirtarbase	mmu-miR-26a-5p	Tmem87b	72477	ENSMUSG00000014353	Sequencing	19536157
mirtarbase	mmu-miR-26a-5p	Pgam5	72542	ENSMUSG00000029500	Sequencing	19536157
mirtarbase	mmu-miR-26a-5p	Tmem135	72759	ENSMUSG00000039428	Sequencing	19536157
mirtarbase	mmu-miR-26a-5p	Fam76b	72826	ENSMUSG00000037808	Sequencing	19536157
mirtarbase	mmu-miR-26a-5p	Rhobtb3	73296	ENSMUSG00000021589	Sequencing	19536157
mirtarbase	mmu-miR-26a-5p	Zdbf2	73884	ENSMUSG00000027520	Sequencing	19536157
mirtarbase	mmu-miR-26a-5p	Dnm1l	74006	ENSMUSG00000022789	Sequencing	19536157
mirtarbase	mmu-miR-26a-5p	Cep350	74081	ENSMUSG00000033671	Sequencing	19536157
mirtarbase	mmu-miR-26a-5p	Tmem43	74122	ENSMUSG00000030095	Sequencing	19536157
mirtarbase	mmu-miR-26a-5p	Acbd5	74159	ENSMUSG00000026781	Sequencing	19536157
mirtarbase	mmu-miR-26a-5p	Acsl3	74205	ENSMUSG00000032883	Sequencing	19536157
mirtarbase	mmu-miR-26a-5p	Lrrtm1	74342	ENSMUSG00000060780	Sequencing	19536157
mirtarbase	mmu-miR-26a-5p	Lonrf3	74365	ENSMUSG00000016239	Sequencing	19536157
mirtarbase	mmu-miR-26a-5p	Eaf1	74427	ENSMUSG00000021890	Sequencing	19536157
mirtarbase	mmu-miR-26a-5p	Tnks2	74493	ENSMUSG00000024811	Sequencing	19536157
mirtarbase	mmu-miR-26a-5p	Zkscan1	74570	ENSMUSG00000029729	Sequencing	19536157
mirtarbase	mmu-miR-26a-5p	Tbc1d30	74694	ENSMUSG00000052302	Sequencing	19536157
mirtarbase	mmu-miR-26a-5p	Ddit4	74747	ENSMUSG00000020108	Sequencing	19536157
mirtarbase	mmu-miR-26a-5p	Purg	75029	ENSMUSG00000049184	Sequencing	19536157
mirtarbase	mmu-miR-26a-5p	Lysmd4	75099	ENSMUSG00000043831	Sequencing	19536157
mirtarbase	mmu-miR-26a-5p	Etnk1	75320	ENSMUSG00000030275	Sequencing	19536157
mirtarbase	mmu-miR-26a-5p	Ttpal	76080	ENSMUSG00000017679	Sequencing	19536157
mirtarbase	mmu-miR-26a-5p	Atp6v0e2	76252	ENSMUSG00000039347	Sequencing	19536157
mirtarbase	mmu-miR-26a-5p	Ndfip2	76273	ENSMUSG00000053253	Sequencing	19536157
mirtarbase	mmu-miR-26a-5p	Slc24a2	76376	ENSMUSG00000037996	Sequencing	19536157
mirtarbase	mmu-miR-26a-5p	Bicd2	76895	ENSMUSG00000037933	Sequencing	19536157
mirtarbase	mmu-miR-26a-5p	Ube2ql1	76980	ENSMUSG00000052981	Sequencing	19536157
mirtarbase	mmu-miR-26a-5p	Atg16l1	77040	ENSMUSG00000026289	Sequencing	19536157
mirtarbase	mmu-miR-26a-5p	Ankrd11	77087	ENSMUSG00000035569	Sequencing	19536157
mirtarbase	mmu-miR-26a-5p	Tanc2	77097	ENSMUSG00000053580	Sequencing	19536157
mirtarbase	mmu-miR-26a-5p	Anks1b	77531	ENSMUSG00000058589	Sequencing	19536157
mirtarbase	mmu-miR-26a-5p	B230219D22Rik	78521	ENSMUSG00000045767	Sequencing	19536157
mirtarbase	mmu-miR-26a-5p	Galnt15	78754	ENSMUSG00000021903	Sequencing	19536157
mirtarbase	mmu-miR-26a-5p	Acox3	80911	ENSMUSG00000029098	Sequencing	19536157
mirtarbase	mmu-miR-26a-5p	Sgpp1	81535	ENSMUSG00000021054	Sequencing	19536157
mirtarbase	mmu-miR-26a-5p	Glce	93683	ENSMUSG00000032252	Sequencing	19536157
mirtarbase	mmu-miR-26a-5p	Entpd7	93685	ENSMUSG00000025192	Sequencing	19536157
mirtarbase	mmu-miR-26a-5p	Tnfrsf21	94185	ENSMUSG00000023915	Sequencing	19536157
mirtarbase	mmu-miR-26a-5p	Spock2	94214	ENSMUSG00000058297	Sequencing	19536157
mirtarbase	mmu-miR-26a-5p	Wwtr1	97064	ENSMUSG00000027803	Sequencing	19536157
mirtarbase	mmu-miR-26a-5p	Atp1a2	98660	ENSMUSG00000007097	Sequencing	19536157
mirtarbase	mmu-miR-26a-5p	Mdn1	100019	ENSMUSG00000058006	Sequencing	19536157
mirtarbase	mmu-miR-26a-5p	AU040320	100317	ENSMUSG00000028830	Sequencing	19536157
mirtarbase	mmu-miR-26a-5p	Akap9	100986	ENSMUSG00000040407	Sequencing	19536157
mirtarbase	mmu-miR-26a-5p	Psip1	101739	ENSMUSG00000028484	Sequencing	19536157
mirtarbase	mmu-miR-26a-5p	Spred3	101809	ENSMUSG00000037239	Sequencing	19536157
mirtarbase	mmu-miR-26a-5p	Dcun1d2	102323	ENSMUSG00000038506	Sequencing	19536157
mirtarbase	mmu-miR-26a-5p	AI597468	103266	ENSMUSG00000060935	Sequencing	19536157
mirtarbase	mmu-miR-26a-5p	Fbxw11	103583	ENSMUSG00000020271	Sequencing	19536157
mirtarbase	mmu-miR-26a-5p	Wdr92	103784	ENSMUSG00000078970	Sequencing	19536157
mirtarbase	mmu-miR-26a-5p	Synj1	104015	ENSMUSG00000022973	Sequencing	19536157
mirtarbase	mmu-miR-26a-5p	Rhoq	104215	ENSMUSG00000024143	Sequencing	19536157
mirtarbase	mmu-miR-26a-5p	Adi1	104923	ENSMUSG00000020629	Sequencing	19536157
mirtarbase	mmu-miR-26a-5p	Golm1	105348	ENSMUSG00000021556	Sequencing	19536157
mirtarbase	mmu-miR-26a-5p	AW549877	106064	ENSMUSG00000041935	Sequencing	19536157
mirtarbase	mmu-miR-26a-5p	Ypel1	106369	ENSMUSG00000022773	Sequencing	19536157
mirtarbase	mmu-miR-26a-5p	Pom121	107939	ENSMUSG00000053293	Sequencing	19536157
mirtarbase	mmu-miR-26a-5p	Ap1s2	108012	ENSMUSG00000031367	Sequencing	19536157
mirtarbase	mmu-miR-26a-5p	Rnf216	108086	ENSMUSG00000045078	Sequencing	19536157
mirtarbase	mmu-miR-26a-5p	Galnt7	108150	ENSMUSG00000031608	Sequencing	19536157
mirtarbase	mmu-miR-26a-5p	Rnf187	108660	ENSMUSG00000020496	Sequencing	19536157
mirtarbase	mmu-miR-26a-5p	Pnrc1	108767	ENSMUSG00000040128	Sequencing	19536157
mirtarbase	mmu-miR-26a-5p	Rdh13	108841	ENSMUSG00000008435	Sequencing	19536157
mirtarbase	mmu-miR-26a-5p	Ankhd1	108857	ENSMUSG00000024483	Sequencing	19536157
mirtarbase	mmu-miR-26a-5p	Ank2	109676	ENSMUSG00000032826	Sequencing	19536157
mirtarbase	mmu-miR-26a-5p	Abr	109934	ENSMUSG00000017631	Sequencing	19536157
mirtarbase	mmu-miR-26a-5p	Scn2a1	110876	ENSMUSG00000075318	Sequencing	19536157
mirtarbase	mmu-miR-26a-5p	Cds2	110911	ENSMUSG00000058793	Sequencing	19536157
mirtarbase	mmu-miR-26a-5p	Hspa13	110920	ENSMUSG00000032932	Sequencing	19536157
mirtarbase	mmu-miR-26a-5p	Nudt19	110959	ENSMUSG00000034875	Sequencing	19536157
mirtarbase	mmu-miR-26a-5p	Slc19a2	116914	ENSMUSG00000040918	Sequencing	19536157
mirtarbase	mmu-miR-26a-5p	Sec63	140740	ENSMUSG00000019802	Sequencing	19536157
mirtarbase	mmu-miR-26a-5p	Bmp2k	140780	ENSMUSG00000034663	Sequencing	19536157
mirtarbase	mmu-miR-26a-5p	Ubn1	170644	ENSMUSG00000039473	Sequencing	19536157
mirtarbase	mmu-miR-26a-5p	Kcnh7	170738	ENSMUSG00000059742	Sequencing	19536157
mirtarbase	mmu-miR-26a-5p	Usp33	170822	ENSMUSG00000025437	Sequencing	19536157
mirtarbase	mmu-miR-26a-5p	Galnt10	171212	ENSMUSG00000020520	Sequencing	19536157
mirtarbase	mmu-miR-26a-5p	Cd99l2	171486	ENSMUSG00000035776	Sequencing	19536157
mirtarbase	mmu-miR-26a-5p	Socs7	192157	ENSMUSG00000038485	Sequencing	19536157
mirtarbase	mmu-miR-26a-5p	Rapgef6	192786	ENSMUSG00000037533	Sequencing	19536157
mirtarbase	mmu-miR-26a-5p	Elfn2	207393	ENSMUSG00000043460	Sequencing	19536157
mirtarbase	mmu-miR-26a-5p	Wdr37	207615	ENSMUSG00000021147	Sequencing	19536157
mirtarbase	mmu-miR-26a-5p	Dot1l	208266	ENSMUSG00000061589	Sequencing	19536157
mirtarbase	mmu-miR-26a-5p	Thnsl1	208967	ENSMUSG00000048550	Sequencing	19536157
mirtarbase	mmu-miR-26a-5p	Hmgcll1	208982	ENSMUSG00000007908	Sequencing	19536157
mirtarbase	mmu-miR-26a-5p	Tbc1d12	209478	ENSMUSG00000048720	Sequencing	19536157
mirtarbase	mmu-miR-26a-5p	Tmem164	209497	ENSMUSG00000047045	Sequencing	19536157
mirtarbase	mmu-miR-26a-5p	Nudcd3	209586	ENSMUSG00000053838	Sequencing	19536157
mirtarbase	mmu-miR-26a-5p	Papd7	210106	ENSMUSG00000034575	Sequencing	19536157
mirtarbase	mmu-miR-26a-5p	Thsd7b	210417	ENSMUSG00000042581	Sequencing	19536157
mirtarbase	mmu-miR-26a-5p	Zfp947	210853	ENSMUSG00000063383	Sequencing	19536157
mirtarbase	mmu-miR-26a-5p	Kbtbd2	210973	ENSMUSG00000059486	Sequencing	19536157
mirtarbase	mmu-miR-26a-5p	Asap2	211914	ENSMUSG00000052632	Sequencing	19536157
mirtarbase	mmu-miR-26a-5p	Kctd7	212919	ENSMUSG00000034110	Sequencing	19536157
mirtarbase	mmu-miR-26a-5p	Arcn1	213827	ENSMUSG00000032096	Sequencing	19536157
mirtarbase	mmu-miR-26a-5p	Sema6d	214968	ENSMUSG00000027200	Sequencing	19536157
mirtarbase	mmu-miR-26a-5p	Hip1	215114	ENSMUSG00000039959	Sequencing	19536157
mirtarbase	mmu-miR-26a-5p	Slc36a1	215335	ENSMUSG00000020261	Sequencing	19536157
mirtarbase	mmu-miR-26a-5p	Lace1	215951	ENSMUSG00000038302	Sequencing	19536157
mirtarbase	mmu-miR-26a-5p	Ckap4	216197	ENSMUSG00000046841	Sequencing	19536157
mirtarbase	mmu-miR-26a-5p	Fnip1	216742	ENSMUSG00000035992	Sequencing	19536157
mirtarbase	mmu-miR-26a-5p	Usp22	216825	ENSMUSG00000042506	Sequencing	19536157
mirtarbase	mmu-miR-26a-5p	Taok1	216965	ENSMUSG00000017291	Sequencing	19536157
mirtarbase	mmu-miR-26a-5p	Ppp1r9b	217124	ENSMUSG00000038976	Sequencing	19536157
mirtarbase	mmu-miR-26a-5p	Tnrc6c	217351	ENSMUSG00000025571	Sequencing	19536157
mirtarbase	mmu-miR-26a-5p	Sgtb	218544	ENSMUSG00000042743	Sequencing	19536157
mirtarbase	mmu-miR-26a-5p	D14Abb1e	218850	ENSMUSG00000040651	Sequencing	19536157
mirtarbase	mmu-miR-26a-5p	Pcdh20	219257	ENSMUSG00000050505	Sequencing	19536157
mirtarbase	mmu-miR-26a-5p	Tmem184b	223693	ENSMUSG00000009035	Sequencing	19536157
mirtarbase	mmu-miR-26a-5p	D17Wsu92e	224647	ENSMUSG00000056692	Sequencing	19536157
mirtarbase	mmu-miR-26a-5p	Anks1	224650	ENSMUSG00000024219	Sequencing	19536157
mirtarbase	mmu-miR-26a-5p	Fbxo11	225055	ENSMUSG00000005371	Sequencing	19536157
mirtarbase	mmu-miR-26a-5p	Abhd17b	226016	ENSMUSG00000047368	Sequencing	19536157
mirtarbase	mmu-miR-26a-5p	Ablim1	226251	ENSMUSG00000025085	Sequencing	19536157
mirtarbase	mmu-miR-26a-5p	Ipo9	226432	ENSMUSG00000041879	Sequencing	19536157
mirtarbase	mmu-miR-26a-5p	Slc9a2	226999	ENSMUSG00000026062	Sequencing	19536157
mirtarbase	mmu-miR-26a-5p	Stradb	227154	ENSMUSG00000026027	Sequencing	19536157
mirtarbase	mmu-miR-26a-5p	Usp40	227334	ENSMUSG00000005501	Sequencing	19536157
mirtarbase	mmu-miR-26a-5p	2310035C23Rik	227446	ENSMUSG00000026319	Sequencing	19536157
mirtarbase	mmu-miR-26a-5p	C1ql3	227580	ENSMUSG00000049630	Sequencing	19536157
mirtarbase	mmu-miR-26a-5p	Ppig	228005	ENSMUSG00000042133	Sequencing	19536157
mirtarbase	mmu-miR-26a-5p	Sestd1	228071	ENSMUSG00000042272	Sequencing	19536157
mirtarbase	mmu-miR-26a-5p	Btbd3	228662	ENSMUSG00000062098	Sequencing	19536157
mirtarbase	mmu-miR-26a-5p	Osbpl2	228983	ENSMUSG00000039050	Sequencing	19536157
mirtarbase	mmu-miR-26a-5p	Ythdf3	229096	ENSMUSG00000047213	Sequencing	19536157
mirtarbase	mmu-miR-26a-5p	AI314180	230249	ENSMUSG00000050812	Sequencing	19536157
mirtarbase	mmu-miR-26a-5p	Megf9	230316	ENSMUSG00000039270	Sequencing	19536157
mirtarbase	mmu-miR-26a-5p	Cpeb2	231207	ENSMUSG00000039782	Sequencing	19536157
mirtarbase	mmu-miR-26a-5p	Mat2a	232087	ENSMUSG00000053907	Sequencing	19536157
mirtarbase	mmu-miR-26a-5p	Mob1a	232157	ENSMUSG00000043131	Sequencing	19536157
mirtarbase	mmu-miR-26a-5p	Txnrd3	232223	ENSMUSG00000000811	Sequencing	19536157
mirtarbase	mmu-miR-26a-5p	Tmf1	232286	ENSMUSG00000030059	Sequencing	19536157
mirtarbase	mmu-miR-26a-5p	Wnk1	232341	ENSMUSG00000045962	Sequencing	19536157
mirtarbase	mmu-miR-26a-5p	Klhl42	232539	ENSMUSG00000040102	Sequencing	19536157
mirtarbase	mmu-miR-26a-5p	Leng8	232798	ENSMUSG00000035545	Sequencing	19536157
mirtarbase	mmu-miR-26a-5p	Crebzf	233490	ENSMUSG00000051451	Sequencing	19536157
mirtarbase	mmu-miR-26a-5p	Tnrc6a	233833	ENSMUSG00000052707	Sequencing	19536157
mirtarbase	mmu-miR-26a-5p	Tmem136	235300	ENSMUSG00000048503	Sequencing	19536157
mirtarbase	mmu-miR-26a-5p	Dlat	235339	ENSMUSG00000000168	Sequencing	19536157
mirtarbase	mmu-miR-26a-5p	Dmxl2	235380	ENSMUSG00000041268	Sequencing	19536157
mirtarbase	mmu-miR-26a-5p	Atp2c1	235574	ENSMUSG00000032570	Sequencing	19536157
mirtarbase	mmu-miR-26a-5p	Osbpl8	237542	ENSMUSG00000020189	Sequencing	19536157
mirtarbase	mmu-miR-26a-5p	Cdr2l	237988	ENSMUSG00000050910	Sequencing	19536157
mirtarbase	mmu-miR-26a-5p	Dock4	238130	ENSMUSG00000035954	Sequencing	19536157
mirtarbase	mmu-miR-26a-5p	Tnpo1	238799	ENSMUSG00000009470	Sequencing	19536157
mirtarbase	mmu-miR-26a-5p	Slc2a13	239606	ENSMUSG00000036298	Sequencing	19536157
mirtarbase	mmu-miR-26a-5p	Dip2b	239667	ENSMUSG00000023026	Sequencing	19536157
mirtarbase	mmu-miR-26a-5p	Lnpep	240028	ENSMUSG00000023845	Sequencing	19536157
mirtarbase	mmu-miR-26a-5p	Dmxl1	240283	ENSMUSG00000037416	Sequencing	19536157
mirtarbase	mmu-miR-26a-5p	Ccnj	240665	ENSMUSG00000025010	Sequencing	19536157
mirtarbase	mmu-miR-26a-5p	Ralgps1	241308	ENSMUSG00000038831	Sequencing	19536157
mirtarbase	mmu-miR-26a-5p	D430041D05Rik	241589	ENSMUSG00000068373	Sequencing	19536157
mirtarbase	mmu-miR-26a-5p	Impad1	242291	ENSMUSG00000066324	Sequencing	19536157
mirtarbase	mmu-miR-26a-5p	Grin3a	242443	ENSMUSG00000039579	Sequencing	19536157
mirtarbase	mmu-miR-26a-5p	Wasf2	242687	ENSMUSG00000028868	Sequencing	19536157
mirtarbase	mmu-miR-26a-5p	Sbno1	243272	ENSMUSG00000038095	Sequencing	19536157
mirtarbase	mmu-miR-26a-5p	Gprin3	243385	ENSMUSG00000045441	Sequencing	19536157
mirtarbase	mmu-miR-26a-5p	Ppp1r9a	243725	ENSMUSG00000032827	Sequencing	19536157
mirtarbase	mmu-miR-26a-5p	Npat	244879	ENSMUSG00000033054	Sequencing	19536157
mirtarbase	mmu-miR-26a-5p	Hdx	245596	ENSMUSG00000034551	Sequencing	19536157
mirtarbase	mmu-miR-26a-5p	Atpaf2	246782	ENSMUSG00000042709	Sequencing	19536157
mirtarbase	mmu-miR-26a-5p	Sh3pxd2b	268396	ENSMUSG00000040711	Sequencing	19536157
mirtarbase	mmu-miR-26a-5p	Xxylt1	268880	ENSMUSG00000047434	Sequencing	19536157
mirtarbase	mmu-miR-26a-5p	Lsamp	268890	ENSMUSG00000061080	Sequencing	19536157
mirtarbase	mmu-miR-26a-5p	Zfp608	269023	ENSMUSG00000052713	Sequencing	19536157
mirtarbase	mmu-miR-26a-5p	Mgat4a	269181	ENSMUSG00000026110	Sequencing	19536157
mirtarbase	mmu-miR-26a-5p	Luzp1	269593	ENSMUSG00000001089	Sequencing	19536157
mirtarbase	mmu-miR-26a-5p	Gm15800	269700	ENSMUSG00000042744	Sequencing	19536157
mirtarbase	mmu-miR-26a-5p	Lhfpl4	269788	ENSMUSG00000042873	Sequencing	19536157
mirtarbase	mmu-miR-26a-5p	Tspan12	269831	ENSMUSG00000029669	Sequencing	19536157
mirtarbase	mmu-miR-26a-5p	Maml2	270118	ENSMUSG00000031925	Sequencing	19536157
mirtarbase	mmu-miR-26a-5p	Shc4	271849	ENSMUSG00000035109	Sequencing	19536157
mirtarbase	mmu-miR-26a-5p	Nol4	319211	ENSMUSG00000041923	Sequencing	19536157
mirtarbase	mmu-miR-26a-5p	Snhg11	319317	ENSMUSG00000044349	Sequencing	19536157
mirtarbase	mmu-miR-26a-5p	Defb20	319579	ENSMUSG00000049560	Sequencing	19536157
mirtarbase	mmu-miR-26a-5p	Apba1	319924	ENSMUSG00000024897	Sequencing	19536157
mirtarbase	mmu-miR-26a-5p	Ercc6	319955	ENSMUSG00000054051	Sequencing	19536157
mirtarbase	mmu-miR-26a-5p	Dgki	320127	ENSMUSG00000038665	Sequencing	19536157
mirtarbase	mmu-miR-26a-5p	Lrrc58	320184	ENSMUSG00000034158	Sequencing	19536157
mirtarbase	mmu-miR-26a-5p	Slc35e2	320541	ENSMUSG00000042202	Sequencing	19536157
mirtarbase	mmu-miR-26a-5p	Mysm1	320713	ENSMUSG00000062627	Sequencing	19536157
mirtarbase	mmu-miR-26a-5p	Ep300	328572	ENSMUSG00000055024	Sequencing	19536157
mirtarbase	mmu-miR-26a-5p	Abi2	329165	ENSMUSG00000026782	Sequencing	19536157
mirtarbase	mmu-miR-26a-5p	Fnip2	329679	ENSMUSG00000061175	Sequencing	19536157
mirtarbase	mmu-miR-26a-5p	N4bp2	333789	ENSMUSG00000037795	Sequencing	19536157
mirtarbase	mmu-miR-26a-5p	Fa2h	338521	ENSMUSG00000033579	Sequencing	19536157
mirtarbase	mmu-miR-26a-5p	N4bp2l2	381695	ENSMUSG00000029655	Sequencing	19536157
mirtarbase	mmu-miR-26a-5p	BC052040	399568	ENSMUSG00000040282	Sequencing	19536157
mirtarbase	mmu-miR-26a-5p	Msantd1	403174	ENSMUSG00000051246	Sequencing	19536157
mirtarbase	mmu-miR-26a-5p	Adcy1	432530	ENSMUSG00000020431	Sequencing	19536157
mirtarbase	mmu-miR-26a-5p	Apcdd1	494504	ENSMUSG00000071847	Sequencing	19536157
mirtarbase	mmu-miR-26a-5p	Kalrn	545156	ENSMUSG00000061751	Sequencing	19536157
mirtarbase	mmu-miR-26a-5p	Parp14	547253	ENSMUSG00000034422	Sequencing	19536157
mirtarbase	mmu-miR-26a-5p	Arhgef26	622434	ENSMUSG00000036885	Sequencing	19536157
tarbase	mmu-miR-26a-5p	0610031J06Rik	56700	ENSMUSG00000001418	Sequencing
tarbase	mmu-miR-26a-5p	1300012G16Rik		ENSMUSG00000029598	Sequencing
tarbase	mmu-miR-26a-5p	1500003O03Rik		ENSMUSG00000014077	Sequencing
tarbase	mmu-miR-26a-5p	2010011I20Rik		ENSMUSG00000027495	Sequencing
tarbase	mmu-miR-26a-5p	2010317E24Rik		ENSMUSG00000026955	Sequencing
tarbase	mmu-miR-26a-5p	2310008H09Rik		ENSMUSG00000030980	Sequencing
tarbase	mmu-miR-26a-5p	2310035C23Rik	227446	ENSMUSG00000026319	Sequencing
tarbase	mmu-miR-26a-5p	3110006E14Rik		ENSMUSG00000052981	Sequencing
tarbase	mmu-miR-26a-5p	4631416L12Rik		ENSMUSG00000036885	Sequencing
tarbase	mmu-miR-26a-5p	4930506M07Rik	71653	ENSMUSG00000041362	Sequencing
tarbase	mmu-miR-26a-5p	5730446C15Rik		ENSMUSG00000047368	Sequencing
tarbase	mmu-miR-26a-5p	A530082C11Rik		ENSMUSG00000042202	Sequencing
tarbase	mmu-miR-26a-5p	A930005I04Rik		ENSMUSG00000051246	Sequencing
tarbase	mmu-miR-26a-5p	Abca1	11303	ENSMUSG00000015243	Sequencing
tarbase	mmu-miR-26a-5p	Abi2	329165	ENSMUSG00000026782	Sequencing
tarbase	mmu-miR-26a-5p	Ablim1	226251	ENSMUSG00000025085	Sequencing
tarbase	mmu-miR-26a-5p	Abr	109934	ENSMUSG00000017631	Sequencing
tarbase	mmu-miR-26a-5p	AC125145.3-1		ENSMUSG00000072677	Sequencing
tarbase	mmu-miR-26a-5p	Acbd5	74159	ENSMUSG00000026781	Sequencing
tarbase	mmu-miR-26a-5p	Acox3	80911	ENSMUSG00000029098	Sequencing
tarbase	mmu-miR-26a-5p	Acsl3	74205	ENSMUSG00000032883	Sequencing
tarbase	mmu-miR-26a-5p	Adcy1	432530	ENSMUSG00000020431	Sequencing
tarbase	mmu-miR-26a-5p	Adi1	104923	ENSMUSG00000020629	Sequencing
tarbase	mmu-miR-26a-5p	Adipor2	68465	ENSMUSG00000030168	Sequencing
tarbase	mmu-miR-26a-5p	Agpat3	28169	ENSMUSG00000001211	Sequencing
tarbase	mmu-miR-26a-5p	AI314180	230249	ENSMUSG00000050812	Sequencing
tarbase	mmu-miR-26a-5p	AI480653		ENSMUSG00000047434	Sequencing
tarbase	mmu-miR-26a-5p	AI597468	103266	ENSMUSG00000060935	Sequencing
tarbase	mmu-miR-26a-5p	Akap9	100986	ENSMUSG00000040407	Sequencing
tarbase	mmu-miR-26a-5p	AL672182.18-1		ENSMUSG00000072933	Sequencing
tarbase	mmu-miR-26a-5p	AL833805.11-2		ENSMUSG00000060628	Sequencing
tarbase	mmu-miR-26a-5p	Alg2	56737	ENSMUSG00000039740	Sequencing
tarbase	mmu-miR-26a-5p	Amot	27494	ENSMUSG00000041688	Sequencing
tarbase	mmu-miR-26a-5p	Ank2	109676	ENSMUSG00000032826	Sequencing
tarbase	mmu-miR-26a-5p	Ankhd1	108857	ENSMUSG00000024483	Sequencing
tarbase	mmu-miR-26a-5p	Ankrd11	77087	ENSMUSG00000035569	Sequencing
tarbase	mmu-miR-26a-5p	Anks1	224650	ENSMUSG00000024219	Sequencing
tarbase	mmu-miR-26a-5p	Anks1b	77531	ENSMUSG00000058589	Sequencing
tarbase	mmu-miR-26a-5p	Ap1s2	108012	ENSMUSG00000031367	Sequencing
tarbase	mmu-miR-26a-5p	Apba1	319924	ENSMUSG00000024897	Sequencing
tarbase	mmu-miR-26a-5p	Apc	11789	ENSMUSG00000005871	Sequencing
tarbase	mmu-miR-26a-5p	Apcdd1	494504	ENSMUSG00000071847	Sequencing
tarbase	mmu-miR-26a-5p	Arcn1	213827	ENSMUSG00000032096	Sequencing
tarbase	mmu-miR-26a-5p	Arf1	11840	ENSMUSG00000048076	Sequencing
tarbase	mmu-miR-26a-5p	Armcx2	67416	ENSMUSG00000033436	Sequencing
tarbase	mmu-miR-26a-5p	Arnt	11863	ENSMUSG00000015522	Sequencing
tarbase	mmu-miR-26a-5p	Arpp19	59046	ENSMUSG00000007656	Sequencing
tarbase	mmu-miR-26a-5p	Arsb	11881	ENSMUSG00000042082	Sequencing
tarbase	mmu-miR-26a-5p	Asap2	211914	ENSMUSG00000052632	Sequencing
tarbase	mmu-miR-26a-5p	Asb1	65247	ENSMUSG00000026311	Sequencing
tarbase	mmu-miR-26a-5p	Atad2	70472	ENSMUSG00000022360	Sequencing
tarbase	mmu-miR-26a-5p	Atad2b	320817	ENSMUSG00000052812	Sequencing
tarbase	mmu-miR-26a-5p	Atg16l1	77040	ENSMUSG00000026289	Sequencing
tarbase	mmu-miR-26a-5p	Atp1a2	98660	ENSMUSG00000007097	Sequencing
tarbase	mmu-miR-26a-5p	Atp2c1	235574	ENSMUSG00000032570	Sequencing
tarbase	mmu-miR-26a-5p	Atp6ap1	54411	ENSMUSG00000019087	Sequencing
tarbase	mmu-miR-26a-5p	Atp6v0e2	76252	ENSMUSG00000039347	Sequencing
tarbase	mmu-miR-26a-5p	Atpaf2	246782	ENSMUSG00000042709	Sequencing
tarbase	mmu-miR-26a-5p	AU040320	100317	ENSMUSG00000028830	Sequencing
tarbase	mmu-miR-26a-5p	AU042671		ENSMUSG00000042744	Sequencing
tarbase	mmu-miR-26a-5p	AW549877	106064	ENSMUSG00000041935	Sequencing
tarbase	mmu-miR-26a-5p	B230219D22Rik	78521	ENSMUSG00000045767	Sequencing
tarbase	mmu-miR-26a-5p	BC052040	399568	ENSMUSG00000040282	Sequencing
tarbase	mmu-miR-26a-5p	Bcl6	12053	ENSMUSG00000022508	Sequencing
tarbase	mmu-miR-26a-5p	Bcl7c	12055	ENSMUSG00000030814	Sequencing
tarbase	mmu-miR-26a-5p	Bicd2	76895	ENSMUSG00000037933	Sequencing
tarbase	mmu-miR-26a-5p	Bmp2k	140780	ENSMUSG00000034663	Sequencing
tarbase	mmu-miR-26a-5p	Bmpr1a	12166	ENSMUSG00000021796	Sequencing
tarbase	mmu-miR-26a-5p	Bnip2	12175	ENSMUSG00000011958	Sequencing
tarbase	mmu-miR-26a-5p	Btbd3	228662	ENSMUSG00000062098	Sequencing
tarbase	mmu-miR-26a-5p	C1ql3	227580	ENSMUSG00000049630	Sequencing
tarbase	mmu-miR-26a-5p	Capn10	23830	ENSMUSG00000026270	Sequencing
tarbase	mmu-miR-26a-5p	Cbx5	12419	ENSMUSG00000009575	Sequencing
tarbase	mmu-miR-26a-5p	Ccnc	51813	ENSMUSG00000028252	Sequencing
tarbase	mmu-miR-26a-5p	Ccnj	240665	ENSMUSG00000025010	Sequencing
tarbase	mmu-miR-26a-5p	Cd93	17064	ENSMUSG00000027435	Sequencing
tarbase	mmu-miR-26a-5p	Cd99l2	171486	ENSMUSG00000035776	Sequencing
tarbase	mmu-miR-26a-5p	Cdc2l5		ENSMUSG00000041297	Sequencing
tarbase	mmu-miR-26a-5p	Cdr2l	237988	ENSMUSG00000050910	Sequencing
tarbase	mmu-miR-26a-5p	Cds2	110911	ENSMUSG00000058793	Sequencing
tarbase	mmu-miR-26a-5p	Celsr2	53883	ENSMUSG00000068740	Sequencing
tarbase	mmu-miR-26a-5p	Cep350	74081	ENSMUSG00000033671	Sequencing
tarbase	mmu-miR-26a-5p	Chmp1b		ENSMUSG00000031242	Sequencing
tarbase	mmu-miR-26a-5p	Ckap4	216197	ENSMUSG00000046841	Sequencing
tarbase	mmu-miR-26a-5p	Clk1	12747	ENSMUSG00000026034	Sequencing
tarbase	mmu-miR-26a-5p	Cpeb2	231207	ENSMUSG00000039782	Sequencing
tarbase	mmu-miR-26a-5p	Cplx2	12890	ENSMUSG00000025867	Sequencing
tarbase	mmu-miR-26a-5p	Cpsf2	51786	ENSMUSG00000041781	Sequencing
tarbase	mmu-miR-26a-5p	Crebzf	233490	ENSMUSG00000051451	Sequencing
tarbase	mmu-miR-26a-5p	Cs	12974	ENSMUSG00000005683	Sequencing
tarbase	mmu-miR-26a-5p	Ctdsp2	52468	ENSMUSG00000078429	Sequencing
tarbase	mmu-miR-26a-5p	Ctsl	13039	ENSMUSG00000021477	Sequencing
tarbase	mmu-miR-26a-5p	Cugbp1		ENSMUSG00000005506	Sequencing
tarbase	mmu-miR-26a-5p	Cyp51	13121	ENSMUSG00000001467	Sequencing
tarbase	mmu-miR-26a-5p	D14Abb1e	218850	ENSMUSG00000040651	Sequencing
tarbase	mmu-miR-26a-5p	D17Wsu92e	224647	ENSMUSG00000056692	Sequencing
tarbase	mmu-miR-26a-5p	D430041D05Rik	241589	ENSMUSG00000068373	Sequencing
tarbase	mmu-miR-26a-5p	Dab1	13131	ENSMUSG00000028519	Sequencing
tarbase	mmu-miR-26a-5p	Dcun1d2	102323	ENSMUSG00000038506	Sequencing
tarbase	mmu-miR-26a-5p	Ddhd2	72108	ENSMUSG00000061313	Sequencing
tarbase	mmu-miR-26a-5p	Ddit4	74747	ENSMUSG00000020108	Sequencing
tarbase	mmu-miR-26a-5p	Ddx3y	26900	ENSMUSG00000069045	Sequencing
tarbase	mmu-miR-26a-5p	Defb20	319579	ENSMUSG00000049560	Sequencing
tarbase	mmu-miR-26a-5p	Degs1	13244	ENSMUSG00000038633	Sequencing
tarbase	mmu-miR-26a-5p	Dgki	320127	ENSMUSG00000038665	Sequencing
tarbase	mmu-miR-26a-5p	Dhcr7	13360	ENSMUSG00000058454	Sequencing
tarbase	mmu-miR-26a-5p	Dip2a	64451	ENSMUSG00000020231	Sequencing
tarbase	mmu-miR-26a-5p	Dip2b	239667	ENSMUSG00000023026	Sequencing
tarbase	mmu-miR-26a-5p	Diras2	68203	ENSMUSG00000047842	Sequencing
tarbase	mmu-miR-26a-5p	Dlat	235339	ENSMUSG00000000168	Sequencing
tarbase	mmu-miR-26a-5p	Dlg2	23859	ENSMUSG00000052572	Sequencing
tarbase	mmu-miR-26a-5p	Dlg5	71228	ENSMUSG00000021782	Sequencing
tarbase	mmu-miR-26a-5p	Dll1	13388	ENSMUSG00000014773	Sequencing
tarbase	mmu-miR-26a-5p	Dmxl1	240283	ENSMUSG00000037416	Sequencing
tarbase	mmu-miR-26a-5p	Dmxl2	235380	ENSMUSG00000041268	Sequencing
tarbase	mmu-miR-26a-5p	Dnm1	13429	ENSMUSG00000026825	Sequencing
tarbase	mmu-miR-26a-5p	Dnm1l	74006	ENSMUSG00000022789	Sequencing
tarbase	mmu-miR-26a-5p	Dock4	238130	ENSMUSG00000035954	Sequencing
tarbase	mmu-miR-26a-5p	Dot1l	208266	ENSMUSG00000061589	Sequencing
tarbase	mmu-miR-26a-5p	Eaf1	74427	ENSMUSG00000021890	Sequencing
tarbase	mmu-miR-26a-5p	EG210853		ENSMUSG00000063383	Sequencing
tarbase	mmu-miR-26a-5p	Egr1	13653	ENSMUSG00000038418	Sequencing
tarbase	mmu-miR-26a-5p	Eif2s3y	26908	ENSMUSG00000069049	Sequencing
tarbase	mmu-miR-26a-5p	Elavl2	15569	ENSMUSG00000008489	Sequencing
tarbase	mmu-miR-26a-5p	Elfn2	207393	ENSMUSG00000043460	Sequencing
tarbase	mmu-miR-26a-5p	Entpd7	93685	ENSMUSG00000025192	Sequencing
tarbase	mmu-miR-26a-5p	Ep300	328572	ENSMUSG00000055024	Sequencing
tarbase	mmu-miR-26a-5p	Ephb2	13844	ENSMUSG00000028664	Sequencing
tarbase	mmu-miR-26a-5p	Eps15	13858	ENSMUSG00000028552	Sequencing
tarbase	mmu-miR-26a-5p	Eps8	13860	ENSMUSG00000015766	Sequencing
tarbase	mmu-miR-26a-5p	Ercc6	319955	ENSMUSG00000054051	Sequencing
tarbase	mmu-miR-26a-5p	Ero1lb	67475	ENSMUSG00000057069	Sequencing
tarbase	mmu-miR-26a-5p	Etnk1	75320	ENSMUSG00000030275	Sequencing
tarbase	mmu-miR-26a-5p	Ezh2	14056	ENSMUSG00000029687	Reporter assay//qRT-PCR//Western blot
tarbase	mmu-miR-26a-5p	Fa2h	338521	ENSMUSG00000033579	Sequencing
tarbase	mmu-miR-26a-5p	Fam76b	72826	ENSMUSG00000037808	Sequencing
tarbase	mmu-miR-26a-5p	Fbxo11	225055	ENSMUSG00000005371	Sequencing
tarbase	mmu-miR-26a-5p	Fbxw11	103583	ENSMUSG00000020271	Sequencing
tarbase	mmu-miR-26a-5p	Fem1b	14155	ENSMUSG00000032244	Sequencing
tarbase	mmu-miR-26a-5p	Fkbp1a	14225	ENSMUSG00000032966	Sequencing
tarbase	mmu-miR-26a-5p	Fkbp1b	14226	ENSMUSG00000020635	Sequencing
tarbase	mmu-miR-26a-5p	Fmn2	54418	ENSMUSG00000028354	Sequencing
tarbase	mmu-miR-26a-5p	Fnip1	216742	ENSMUSG00000035992	Sequencing
tarbase	mmu-miR-26a-5p	Fnip2	329679	ENSMUSG00000061175	Sequencing
tarbase	mmu-miR-26a-5p	Foxk2	68837	ENSMUSG00000039275	Sequencing
tarbase	mmu-miR-26a-5p	Fubp1	51886	ENSMUSG00000028034	Sequencing
tarbase	mmu-miR-26a-5p	Gabrg3	14407	ENSMUSG00000055026	Sequencing
tarbase	mmu-miR-26a-5p	Galnt10	171212	ENSMUSG00000020520	Sequencing
tarbase	mmu-miR-26a-5p	Galnt7	108150	ENSMUSG00000031608	Sequencing
tarbase	mmu-miR-26a-5p	Galntl2		ENSMUSG00000021903	Sequencing
tarbase	mmu-miR-26a-5p	Gcnt1	14537	ENSMUSG00000038843	Sequencing
tarbase	mmu-miR-26a-5p	Glb1	12091	ENSMUSG00000045594	Sequencing
tarbase	mmu-miR-26a-5p	Glce	93683	ENSMUSG00000032252	Sequencing
tarbase	mmu-miR-26a-5p	Glrb	14658	ENSMUSG00000028020	Sequencing
tarbase	mmu-miR-26a-5p	Gnao1	14681	ENSMUSG00000031748	Sequencing
tarbase	mmu-miR-26a-5p	Gnaq	14682	ENSMUSG00000024639	Sequencing
tarbase	mmu-miR-26a-5p	Gnb4	14696	ENSMUSG00000027669	Sequencing
tarbase	mmu-miR-26a-5p	Gne	50798	ENSMUSG00000028479	Sequencing
tarbase	mmu-miR-26a-5p	Gng12	14701	ENSMUSG00000036402	Sequencing
tarbase	mmu-miR-26a-5p	Golm1	105348	ENSMUSG00000021556	Sequencing
tarbase	mmu-miR-26a-5p	Gpam	14732	ENSMUSG00000024978	Sequencing
tarbase	mmu-miR-26a-5p	Gpr89	67549	ENSMUSG00000028096	Sequencing
tarbase	mmu-miR-26a-5p	Gprin3	243385	ENSMUSG00000045441	Sequencing
tarbase	mmu-miR-26a-5p	Gria2	14800	ENSMUSG00000033981	Sequencing
tarbase	mmu-miR-26a-5p	Gria4	14802	ENSMUSG00000025892	Sequencing
tarbase	mmu-miR-26a-5p	Grin3a	242443	ENSMUSG00000039579	Sequencing
tarbase	mmu-miR-26a-5p	Gsr	14782	ENSMUSG00000031584	Sequencing
tarbase	mmu-miR-26a-5p	Hdx	245596	ENSMUSG00000034551	Sequencing
tarbase	mmu-miR-26a-5p	Hip1	215114	ENSMUSG00000039959	Sequencing
tarbase	mmu-miR-26a-5p	Hipk1	15257	ENSMUSG00000008730	Sequencing
tarbase	mmu-miR-26a-5p	Hmgcll1	208982	ENSMUSG00000007908	Sequencing
tarbase	mmu-miR-26a-5p	Homer1	26556	ENSMUSG00000007617	Sequencing
tarbase	mmu-miR-26a-5p	Hp1bp3	15441	ENSMUSG00000028759	Sequencing
tarbase	mmu-miR-26a-5p	Hsd11b1	15483	ENSMUSG00000016194	Sequencing
tarbase	mmu-miR-26a-5p	Hspa13	110920	ENSMUSG00000032932	Sequencing
tarbase	mmu-miR-26a-5p	Huwe1	59026	ENSMUSG00000025261	Sequencing
tarbase	mmu-miR-26a-5p	Impad1	242291	ENSMUSG00000066324	Sequencing
tarbase	mmu-miR-26a-5p	Ipo9	226432	ENSMUSG00000041879	Sequencing
tarbase	mmu-miR-26a-5p	Itgb1	16412	ENSMUSG00000025809	Sequencing
tarbase	mmu-miR-26a-5p	Itsn2	20403	ENSMUSG00000020640	Sequencing
tarbase	mmu-miR-26a-5p	Jagn1	67767	ENSMUSG00000051256	Sequencing
tarbase	mmu-miR-26a-5p	Jarid2	16468	ENSMUSG00000038518	Sequencing
tarbase	mmu-miR-26a-5p	Kalrn	545156	ENSMUSG00000061751	Sequencing
tarbase	mmu-miR-26a-5p	Kbtbd2	210973	ENSMUSG00000059486	Sequencing
tarbase	mmu-miR-26a-5p	Kcnh1	16510	ENSMUSG00000058248	Sequencing
tarbase	mmu-miR-26a-5p	Kcnh7	170738	ENSMUSG00000059742	Sequencing
tarbase	mmu-miR-26a-5p	Kcnj2	16518	ENSMUSG00000041695	Sequencing
tarbase	mmu-miR-26a-5p	Kcnk1	16525	ENSMUSG00000033998	Sequencing
tarbase	mmu-miR-26a-5p	Kctd7	212919	ENSMUSG00000034110	Sequencing
tarbase	mmu-miR-26a-5p	Kdelr2	66913	ENSMUSG00000079111	Sequencing
tarbase	mmu-miR-26a-5p	Kif3b	16569	ENSMUSG00000027475	Sequencing
tarbase	mmu-miR-26a-5p	Kitl	17311	ENSMUSG00000019966	Sequencing
tarbase	mmu-miR-26a-5p	Klf13	50794	ENSMUSG00000052040	Sequencing
tarbase	mmu-miR-26a-5p	Klhdc5		ENSMUSG00000040102	Sequencing
tarbase	mmu-miR-26a-5p	Klhl5	71778	ENSMUSG00000054920	Sequencing
tarbase	mmu-miR-26a-5p	Kpna4	16649	ENSMUSG00000027782	Sequencing
tarbase	mmu-miR-26a-5p	Kpnb1	16211	ENSMUSG00000001440	Sequencing
tarbase	mmu-miR-26a-5p	L1cam	16728	ENSMUSG00000031391	Sequencing
tarbase	mmu-miR-26a-5p	Lace1	215951	ENSMUSG00000038302	Sequencing
tarbase	mmu-miR-26a-5p	Laptm4a	17775	ENSMUSG00000020585	Sequencing
tarbase	mmu-miR-26a-5p	Leng8	232798	ENSMUSG00000035545	Sequencing
tarbase	mmu-miR-26a-5p	Lhfpl4	269788	ENSMUSG00000042873	Sequencing
tarbase	mmu-miR-26a-5p	Lman1	70361	ENSMUSG00000041891	Sequencing
tarbase	mmu-miR-26a-5p	Lmbrd1	68421	ENSMUSG00000073725	Sequencing
tarbase	mmu-miR-26a-5p	Lnpep	240028	ENSMUSG00000023845	Sequencing
tarbase	mmu-miR-26a-5p	Lonrf3	74365	ENSMUSG00000016239	Sequencing
tarbase	mmu-miR-26a-5p	Lrrc58	320184	ENSMUSG00000034158	Sequencing
tarbase	mmu-miR-26a-5p	Lrrn3	16981	ENSMUSG00000036295	Sequencing
tarbase	mmu-miR-26a-5p	Lrrtm1	74342	ENSMUSG00000060780	Sequencing
tarbase	mmu-miR-26a-5p	Lsamp	268890	ENSMUSG00000061080	Sequencing
tarbase	mmu-miR-26a-5p	Luzp1	269593	ENSMUSG00000001089	Sequencing
tarbase	mmu-miR-26a-5p	Lysmd4	75099	ENSMUSG00000043831	Sequencing
tarbase	mmu-miR-26a-5p	Macf1	11426	ENSMUSG00000028649	Sequencing
tarbase	mmu-miR-26a-5p	Maml2	270118	ENSMUSG00000031925	Sequencing
tarbase	mmu-miR-26a-5p	Map2k4	26398	ENSMUSG00000033352	Sequencing
tarbase	mmu-miR-26a-5p	Map3k7ip2		ENSMUSG00000015755	Sequencing
tarbase	mmu-miR-26a-5p	Mapk9	26420	ENSMUSG00000020366	Sequencing
tarbase	mmu-miR-26a-5p	Marcksl1	17357	ENSMUSG00000047945	Sequencing
tarbase	mmu-miR-26a-5p	Mat2a	232087	ENSMUSG00000053907	Sequencing
tarbase	mmu-miR-26a-5p	Mdn1	100019	ENSMUSG00000058006	Sequencing
tarbase	mmu-miR-26a-5p	Mef2c	17260	ENSMUSG00000005583	Sequencing
tarbase	mmu-miR-26a-5p	Megf9	230316	ENSMUSG00000039270	Sequencing
tarbase	mmu-miR-26a-5p	Mesdc2	67943	ENSMUSG00000038503	Sequencing
tarbase	mmu-miR-26a-5p	Mgat4a	269181	ENSMUSG00000026110	Sequencing
tarbase	mmu-miR-26a-5p	Mlf2	30853	ENSMUSG00000030120	Sequencing
tarbase	mmu-miR-26a-5p	Mllt11	56772	ENSMUSG00000053192	Sequencing
tarbase	mmu-miR-26a-5p	Mmp16	17389	ENSMUSG00000028226	Sequencing
tarbase	mmu-miR-26a-5p	Mobkl1a		ENSMUSG00000006262	Sequencing
tarbase	mmu-miR-26a-5p	Mobkl1b		ENSMUSG00000043131	Sequencing
tarbase	mmu-miR-26a-5p	Mrfap1	67568	ENSMUSG00000055302	Sequencing
tarbase	mmu-miR-26a-5p	Mtap1a		ENSMUSG00000027254	Sequencing
tarbase	mmu-miR-26a-5p	Mtap2		ENSMUSG00000015222	Sequencing
tarbase	mmu-miR-26a-5p	Mtmr1	53332	ENSMUSG00000015214	Sequencing
tarbase	mmu-miR-26a-5p	Mtx2	53375	ENSMUSG00000027099	Sequencing
tarbase	mmu-miR-26a-5p	Mysm1	320713	ENSMUSG00000062627	Sequencing
tarbase	mmu-miR-26a-5p	N4bp2	333789	ENSMUSG00000037795	Sequencing
tarbase	mmu-miR-26a-5p	N4bp2l2	381695	ENSMUSG00000029655	Sequencing
tarbase	mmu-miR-26a-5p	Nacc2	67991	ENSMUSG00000026932	Sequencing
tarbase	mmu-miR-26a-5p	Ncan	13004	ENSMUSG00000002341	Sequencing
tarbase	mmu-miR-26a-5p	Ndfip2	76273	ENSMUSG00000053253	Sequencing
tarbase	mmu-miR-26a-5p	Nfix	18032	ENSMUSG00000001911	Sequencing
tarbase	mmu-miR-26a-5p	Nol4	319211	ENSMUSG00000041923	Sequencing
tarbase	mmu-miR-26a-5p	Nope		ENSMUSG00000032816	Sequencing
tarbase	mmu-miR-26a-5p	Npat	244879	ENSMUSG00000033054	Sequencing
tarbase	mmu-miR-26a-5p	Nrarp	67122	ENSMUSG00000078202	Sequencing
tarbase	mmu-miR-26a-5p	Nrsn1	22360	ENSMUSG00000048978	Sequencing
tarbase	mmu-miR-26a-5p	Nts	67405	ENSMUSG00000019890	Sequencing
tarbase	mmu-miR-26a-5p	Nudcd3	209586	ENSMUSG00000053838	Sequencing
tarbase	mmu-miR-26a-5p	Nudt11	58242	ENSMUSG00000073295	Sequencing
tarbase	mmu-miR-26a-5p	Nudt11	102954	ENSMUSG00000073295	Sequencing
tarbase	mmu-miR-26a-5p	Nudt19	110959	ENSMUSG00000034875	Sequencing
tarbase	mmu-miR-26a-5p	Osbpl2	228983	ENSMUSG00000039050	Sequencing
tarbase	mmu-miR-26a-5p	Osbpl8	237542	ENSMUSG00000020189	Sequencing
tarbase	mmu-miR-26a-5p	Otud1	71198	ENSMUSG00000043415	Sequencing
tarbase	mmu-miR-26a-5p	P140		ENSMUSG00000038453	Sequencing
tarbase	mmu-miR-26a-5p	Parp14	547253	ENSMUSG00000034422	Sequencing
tarbase	mmu-miR-26a-5p	Patz1	56218	ENSMUSG00000020453	Sequencing
tarbase	mmu-miR-26a-5p	Pcdh20	219257	ENSMUSG00000050505	Sequencing
tarbase	mmu-miR-26a-5p	Pcmt1	18537	ENSMUSG00000019795	Sequencing
tarbase	mmu-miR-26a-5p	Pcnx	54604	ENSMUSG00000021140	Sequencing
tarbase	mmu-miR-26a-5p	Pgam5	72542	ENSMUSG00000029500	Sequencing
tarbase	mmu-miR-26a-5p	Pgr	18667	ENSMUSG00000031870	Sequencing
tarbase	mmu-miR-26a-5p	Pgrmc2	70804	ENSMUSG00000049940	Sequencing
tarbase	mmu-miR-26a-5p	Phf6	70998	ENSMUSG00000025626	Sequencing
tarbase	mmu-miR-26a-5p	Pigm	67556	ENSMUSG00000050229	Sequencing
tarbase	mmu-miR-26a-5p	Pik3r3	18710	ENSMUSG00000028698	Sequencing
tarbase	mmu-miR-26a-5p	Plp1	18823	ENSMUSG00000031425	Sequencing
tarbase	mmu-miR-26a-5p	Pnrc1	108767	ENSMUSG00000040128	Sequencing
tarbase	mmu-miR-26a-5p	Polb	18970	ENSMUSG00000031536	Sequencing
tarbase	mmu-miR-26a-5p	Pols		ENSMUSG00000034575	Sequencing
tarbase	mmu-miR-26a-5p	Pom121	107939	ENSMUSG00000053293	Sequencing
tarbase	mmu-miR-26a-5p	Ppig	228005	ENSMUSG00000042133	Sequencing
tarbase	mmu-miR-26a-5p	Ppp1r9a	243725	ENSMUSG00000032827	Sequencing
tarbase	mmu-miR-26a-5p	Ppp1r9b	217124	ENSMUSG00000038976	Sequencing
tarbase	mmu-miR-26a-5p	Ppp3r1	19058	ENSMUSG00000033953	Sequencing
tarbase	mmu-miR-26a-5p	Psip1	101739	ENSMUSG00000028484	Sequencing
tarbase	mmu-miR-26a-5p	Ptprd	19266	ENSMUSG00000028399	Sequencing
tarbase	mmu-miR-26a-5p	Ptprg	19270	ENSMUSG00000021745	Sequencing
tarbase	mmu-miR-26a-5p	Purb	19291	ENSMUSG00000094483	Sequencing
tarbase	mmu-miR-26a-5p	Purg	75029	ENSMUSG00000049184	Sequencing
tarbase	mmu-miR-26a-5p	Qk	19317	ENSMUSG00000062078	Sequencing
tarbase	mmu-miR-26a-5p	Qk	101055707	ENSMUSG00000044407	Sequencing
tarbase	mmu-miR-26a-5p	Qk	101056603	ENSMUSG00000044407	Sequencing
tarbase	mmu-miR-26a-5p	Ralgps1	241308	ENSMUSG00000038831	Sequencing
tarbase	mmu-miR-26a-5p	Rapgef6	192786	ENSMUSG00000037533	Sequencing
tarbase	mmu-miR-26a-5p	Rdh13	108841	ENSMUSG00000008435	Sequencing
tarbase	mmu-miR-26a-5p	Rhobtb3	73296	ENSMUSG00000021589	Sequencing
tarbase	mmu-miR-26a-5p	Rhoq	104215	ENSMUSG00000024143	Sequencing
tarbase	mmu-miR-26a-5p	Rnf138	56515	ENSMUSG00000024317	Sequencing
tarbase	mmu-miR-26a-5p	Rnf141	67150	ENSMUSG00000030788	Sequencing
tarbase	mmu-miR-26a-5p	Rnf187	108660	ENSMUSG00000020496	Sequencing
tarbase	mmu-miR-26a-5p	Rnf216	108086	ENSMUSG00000045078	Sequencing
tarbase	mmu-miR-26a-5p	Rragc	54170	ENSMUSG00000028646	Sequencing
tarbase	mmu-miR-26a-5p	Rragd	52187	ENSMUSG00000028278	Sequencing
tarbase	mmu-miR-26a-5p	Sall1	58198	ENSMUSG00000031665	Sequencing
tarbase	mmu-miR-26a-5p	Sbno1	243272	ENSMUSG00000038095	Sequencing
tarbase	mmu-miR-26a-5p	Scamp3	24045	ENSMUSG00000028049	Sequencing
tarbase	mmu-miR-26a-5p	Scamp5	56807	ENSMUSG00000040722	Sequencing
tarbase	mmu-miR-26a-5p	Scn2a1	110876	ENSMUSG00000075318	Sequencing
tarbase	mmu-miR-26a-5p	Scrn1	69938	ENSMUSG00000019124	Sequencing
tarbase	mmu-miR-26a-5p	Sdc2	15529	ENSMUSG00000022261	Sequencing
tarbase	mmu-miR-26a-5p	Sec63	140740	ENSMUSG00000019802	Sequencing
tarbase	mmu-miR-26a-5p	Sema6a	20358	ENSMUSG00000019647	Sequencing
tarbase	mmu-miR-26a-5p	Sema6d	214968	ENSMUSG00000027200	Sequencing
tarbase	mmu-miR-26a-5p	Sept2	18000	ENSMUSG00000026276	Sequencing
tarbase	mmu-miR-26a-5p	Serinc1	56442	ENSMUSG00000019877	Sequencing
tarbase	mmu-miR-26a-5p	Serinc3	26943	ENSMUSG00000017707	Sequencing
tarbase	mmu-miR-26a-5p	Serpinf1	20317	ENSMUSG00000000753	Sequencing
tarbase	mmu-miR-26a-5p	Sestd1	228071	ENSMUSG00000042272	Sequencing
tarbase	mmu-miR-26a-5p	Sgpp1	81535	ENSMUSG00000021054	Sequencing
tarbase	mmu-miR-26a-5p	Sgtb	218544	ENSMUSG00000042743	Sequencing
tarbase	mmu-miR-26a-5p	Sh3d19	27059	ENSMUSG00000028082	Sequencing
tarbase	mmu-miR-26a-5p	Sh3pxd2b	268396	ENSMUSG00000040711	Sequencing
tarbase	mmu-miR-26a-5p	Shc4	271849	ENSMUSG00000035109	Sequencing
tarbase	mmu-miR-26a-5p	Slc16a7	20503	ENSMUSG00000020102	Sequencing
tarbase	mmu-miR-26a-5p	Slc19a2	116914	ENSMUSG00000040918	Sequencing
tarbase	mmu-miR-26a-5p	Slc1a1	20510	ENSMUSG00000024935	Sequencing
tarbase	mmu-miR-26a-5p	Slc23a2	54338	ENSMUSG00000027340	Sequencing
tarbase	mmu-miR-26a-5p	Slc24a2	76376	ENSMUSG00000037996	Sequencing
tarbase	mmu-miR-26a-5p	Slc25a46	67453	ENSMUSG00000024259	Sequencing
tarbase	mmu-miR-26a-5p	Slc2a13	239606	ENSMUSG00000036298	Sequencing
tarbase	mmu-miR-26a-5p	Slc30a1	22782	ENSMUSG00000037434	Sequencing
tarbase	mmu-miR-26a-5p	Slc36a1	215335	ENSMUSG00000020261	Sequencing
tarbase	mmu-miR-26a-5p	Slc38a2	67760	ENSMUSG00000022462	Sequencing
tarbase	mmu-miR-26a-5p	Slc4a8	59033	ENSMUSG00000023032	Sequencing
tarbase	mmu-miR-26a-5p	Slc7a1	11987	ENSMUSG00000041313	Sequencing
tarbase	mmu-miR-26a-5p	Slc9a2	226999	ENSMUSG00000026062	Sequencing
tarbase	mmu-miR-26a-5p	Snhg11	319317	ENSMUSG00000044349	Sequencing
tarbase	mmu-miR-26a-5p	Socs6	54607	ENSMUSG00000056153	Sequencing
tarbase	mmu-miR-26a-5p	Socs7	192157	ENSMUSG00000038485	Sequencing
tarbase	mmu-miR-26a-5p	Sos1	20662	ENSMUSG00000024241	Sequencing
tarbase	mmu-miR-26a-5p	Sox6	20679	ENSMUSG00000051910	Sequencing
tarbase	mmu-miR-26a-5p	Spast	50850	ENSMUSG00000024068	Sequencing
tarbase	mmu-miR-26a-5p	Spock2	94214	ENSMUSG00000058297	Sequencing
tarbase	mmu-miR-26a-5p	Spred3	101809	ENSMUSG00000037239	Sequencing
tarbase	mmu-miR-26a-5p	Srprb	20818	ENSMUSG00000032553	Sequencing
tarbase	mmu-miR-26a-5p	Ssfa2	70599	ENSMUSG00000027007	Sequencing
tarbase	mmu-miR-26a-5p	Sst	20604	ENSMUSG00000004366	Sequencing
tarbase	mmu-miR-26a-5p	St8sia4	20452	ENSMUSG00000040710	Sequencing
tarbase	mmu-miR-26a-5p	Stag1	20842	ENSMUSG00000037286	Sequencing
tarbase	mmu-miR-26a-5p	Stk39	53416	ENSMUSG00000027030	Sequencing
tarbase	mmu-miR-26a-5p	Stradb	227154	ENSMUSG00000026027	Sequencing
tarbase	mmu-miR-26a-5p	Strbp	20744	ENSMUSG00000026915	Sequencing
tarbase	mmu-miR-26a-5p	Syne2	319565	ENSMUSG00000063450	Sequencing
tarbase	mmu-miR-26a-5p	Synj1	104015	ENSMUSG00000022973	Sequencing
tarbase	mmu-miR-26a-5p	Syt2	20980	ENSMUSG00000026452	Sequencing
tarbase	mmu-miR-26a-5p	Tanc2	77097	ENSMUSG00000053580	Sequencing
tarbase	mmu-miR-26a-5p	Taok1	216965	ENSMUSG00000017291	Sequencing
tarbase	mmu-miR-26a-5p	Tbc1d12	209478	ENSMUSG00000048720	Sequencing
tarbase	mmu-miR-26a-5p	Tbc1d23	67581	ENSMUSG00000022749	Sequencing
tarbase	mmu-miR-26a-5p	Tbc1d30	74694	ENSMUSG00000052302	Sequencing
tarbase	mmu-miR-26a-5p	Tbr1	21375	ENSMUSG00000035033	Sequencing
tarbase	mmu-miR-26a-5p	Tcf4	21413	ENSMUSG00000053477	Sequencing
tarbase	mmu-miR-26a-5p	Thnsl1	208967	ENSMUSG00000048550	Sequencing
tarbase	mmu-miR-26a-5p	Thsd7b	210417	ENSMUSG00000042581	Sequencing
tarbase	mmu-miR-26a-5p	Tmem135	72759	ENSMUSG00000039428	Sequencing
tarbase	mmu-miR-26a-5p	Tmem136	235300	ENSMUSG00000048503	Sequencing
tarbase	mmu-miR-26a-5p	Tmem151b	210573	ENSMUSG00000096847	Sequencing
tarbase	mmu-miR-26a-5p	Tmem164	209497	ENSMUSG00000047045	Sequencing
tarbase	mmu-miR-26a-5p	Tmem184b	223693	ENSMUSG00000009035	Sequencing
tarbase	mmu-miR-26a-5p	Tmem30a	69981	ENSMUSG00000032328	Sequencing
tarbase	mmu-miR-26a-5p	Tmem43	74122	ENSMUSG00000030095	Sequencing
tarbase	mmu-miR-26a-5p	Tmem87b	72477	ENSMUSG00000014353	Sequencing
tarbase	mmu-miR-26a-5p	Tmf1	232286	ENSMUSG00000030059	Sequencing
tarbase	mmu-miR-26a-5p	Tmod1	21916	ENSMUSG00000028328	Sequencing
tarbase	mmu-miR-26a-5p	Tmod2	50876	ENSMUSG00000032186	Sequencing
tarbase	mmu-miR-26a-5p	Tnfrsf21	94185	ENSMUSG00000023915	Sequencing
tarbase	mmu-miR-26a-5p	Tnks2	74493	ENSMUSG00000024811	Sequencing
tarbase	mmu-miR-26a-5p	Tnpo1	238799	ENSMUSG00000009470	Sequencing
tarbase	mmu-miR-26a-5p	Tnrc6a	233833	ENSMUSG00000052707	Sequencing
tarbase	mmu-miR-26a-5p	Tnrc6c	217351	ENSMUSG00000025571	Sequencing
tarbase	mmu-miR-26a-5p	Tob1	22057	ENSMUSG00000037573	Sequencing
tarbase	mmu-miR-26a-5p	Tomm40	53333	ENSMUSG00000002984	Sequencing
tarbase	mmu-miR-26a-5p	Tpd52	21985	ENSMUSG00000027506	Sequencing
tarbase	mmu-miR-26a-5p	Trak1	67095	ENSMUSG00000032536	Sequencing
tarbase	mmu-miR-26a-5p	Trp53inp1	60599	ENSMUSG00000028211	Sequencing
tarbase	mmu-miR-26a-5p	Trpc3	22065	ENSMUSG00000027716	Sequencing
tarbase	mmu-miR-26a-5p	Tspan12	269831	ENSMUSG00000029669	Sequencing
tarbase	mmu-miR-26a-5p	Tspan2	70747	ENSMUSG00000027858	Sequencing
tarbase	mmu-miR-26a-5p	Ttc14	67120	ENSMUSG00000027677	Sequencing
tarbase	mmu-miR-26a-5p	Ttpal	76080	ENSMUSG00000017679	Sequencing
tarbase	mmu-miR-26a-5p	Tulp3	22158	ENSMUSG00000001521	Sequencing
tarbase	mmu-miR-26a-5p	Txnrd3		ENSMUSG00000000811	Sequencing
tarbase	mmu-miR-26a-5p	Ube2k	53323	ENSMUSG00000029203	Sequencing
tarbase	mmu-miR-26a-5p	Ube2l3	22195	ENSMUSG00000038965	Sequencing
tarbase	mmu-miR-26a-5p	Ube2l3	545578	ENSMUSG00000038965	Sequencing
tarbase	mmu-miR-26a-5p	Ube2l3	100040961	ENSMUSG00000038965	Sequencing
tarbase	mmu-miR-26a-5p	Ube2l3	100042355	ENSMUSG00000038965	Sequencing
tarbase	mmu-miR-26a-5p	Ube2l3	100045901	ENSMUSG00000038965	Sequencing
tarbase	mmu-miR-26a-5p	Ube2l3	100502680	ENSMUSG00000038965	Sequencing
tarbase	mmu-miR-26a-5p	Ube2q1	70093	ENSMUSG00000042572	Sequencing
tarbase	mmu-miR-26a-5p	Ubn1	170644	ENSMUSG00000039473	Sequencing
tarbase	mmu-miR-26a-5p	Ubr3	68795	ENSMUSG00000044308	Sequencing
tarbase	mmu-miR-26a-5p	Ulk1	22241	ENSMUSG00000029512	Sequencing
tarbase	mmu-miR-26a-5p	Usp22	216825	ENSMUSG00000042506	Sequencing
tarbase	mmu-miR-26a-5p	Usp25	30940	ENSMUSG00000022867	Sequencing
tarbase	mmu-miR-26a-5p	Usp33	170822	ENSMUSG00000025437	Sequencing
tarbase	mmu-miR-26a-5p	Usp40	227334	ENSMUSG00000005501	Sequencing
tarbase	mmu-miR-26a-5p	Vbp1	22327	ENSMUSG00000031197	Sequencing
tarbase	mmu-miR-26a-5p	Vps26a	30930	ENSMUSG00000020078	Sequencing
tarbase	mmu-miR-26a-5p	Vps37a	52348	ENSMUSG00000031600	Sequencing
tarbase	mmu-miR-26a-5p	Wasf2	242687	ENSMUSG00000028868	Sequencing
tarbase	mmu-miR-26a-5p	Wdr37	207615	ENSMUSG00000021147	Sequencing
tarbase	mmu-miR-26a-5p	Wdr92	103784	ENSMUSG00000078970	Sequencing
tarbase	mmu-miR-26a-5p	Wnk1	232341	ENSMUSG00000045962	Sequencing
tarbase	mmu-miR-26a-5p	Wwtr1	97064	ENSMUSG00000027803	Sequencing
tarbase	mmu-miR-26a-5p	Ypel1	106369	ENSMUSG00000022773	Sequencing
tarbase	mmu-miR-26a-5p	Ythdf3	229096	ENSMUSG00000047213	Sequencing
tarbase	mmu-miR-26a-5p	Ywhae	22627	ENSMUSG00000020849	Sequencing
tarbase	mmu-miR-26a-5p	Zdbf2	73884	ENSMUSG00000027520	Sequencing
tarbase	mmu-miR-26a-5p	Zdhhc6	66980	ENSMUSG00000024982	Sequencing
tarbase	mmu-miR-26a-5p	Zeb2	24136	ENSMUSG00000026872	Sequencing
tarbase	mmu-miR-26a-5p	Zfp40	22700	ENSMUSG00000002617	Sequencing
tarbase	mmu-miR-26a-5p	Zfp608	269023	ENSMUSG00000052713	Sequencing
tarbase	mmu-miR-26a-5p	Zic2	22772	ENSMUSG00000061524	Sequencing
tarbase	mmu-miR-26a-5p	Zik1	22775	ENSMUSG00000030393	Sequencing
tarbase	mmu-miR-26a-5p	Zkscan1	74570	ENSMUSG00000029729	Sequencing
tarbase	mmu-miR-26a-5p	Zmym4	67785	ENSMUSG00000042446	Sequencing
tarbase	mmu-miR-26a-5p	Zranb2	53861	ENSMUSG00000028180	Sequencing

## Sheet: mmu-miR-30a-5p
database	mature_mirna_id	target_symbol	target_entrez	target_ensembl	experiment	pubmed_id
mirtarbase	mmu-miR-30a-5p	Ak1	11636	ENSMUSG00000026817	Microarray//Luciferase reporter assay//Northern blot//qRT-PCR	19185580
mirtarbase	mmu-miR-30a-5p	Bdnf	12064	ENSMUSG00000048482	ELISA//Luciferase reporter assay//Microarray//qRT-PCR	20921386
mirtarbase	mmu-miR-30a-5p	Egfr	13649	ENSMUSG00000020122	Microarray//Northern blot//qRT-PCR	19185580
mirtarbase	mmu-miR-30a-5p	Inhba	16323	ENSMUSG00000041324	Microarray//Northern blot//qRT-PCR	19185580
mirtarbase	mmu-miR-30a-5p	Abcb1b	18669	ENSMUSG00000028970	Microarray//Northern blot//qRT-PCR	19185580
mirtarbase	mmu-miR-30a-5p	Snai1	20613	ENSMUSG00000042821	Luciferase reporter assay//Western blot	21945074
mirtarbase	mmu-miR-30a-5p	Tnrc6a	233833	ENSMUSG00000052707	Microarray//Luciferase reporter assay//Northern blot//qRT-PCR	19185580

## Sheet: mmu-miR-30c-5p
database	mature_mirna_id	target_symbol	target_entrez	target_ensembl	experiment	pubmed_id
mirecords	mmu-miR-30c-5p	Runx2	12393	ENSMUSG00000039153	Western blot	21628588
mirtarbase	mmu-miR-30c-5p	Runx1	12394	ENSMUSG00000022952	Luciferase reporter assay//Western blot	19114653
mirtarbase	mmu-miR-30c-5p	Snai1	20613	ENSMUSG00000042821	Luciferase reporter assay//Western blot	21945074

## Sheet: mmu-miR-30d-5p
database	mature_mirna_id	target_symbol	target_entrez	target_ensembl	experiment	pubmed_id
mirtarbase	mmu-miR-30d-5p	Bdnf	12064	ENSMUSG00000048482	ELISA//Luciferase reporter assay//Microarray//qRT-PCR	20921386
mirtarbase	mmu-miR-30d-5p	Map4k4	26921	ENSMUSG00000026074	Luciferase reporter assay//Western blot	22733810

## Sheet: mmu-miR-30e-5p
database	mature_mirna_id	target_symbol	target_entrez	target_ensembl	experiment	pubmed_id
mirecords	mmu-miR-30e-5p	bcl-2			immunocytochemistry	21415464
mirtarbase	mmu-miR-30e-5p	Acp2	11432	ENSMUSG00000002103	Sequencing	19536157
mirtarbase	mmu-miR-30e-5p	Adam22	11496	ENSMUSG00000040537	Sequencing	19536157
mirtarbase	mmu-miR-30e-5p	Adam9	11502	ENSMUSG00000031555	Sequencing	19536157
mirtarbase	mmu-miR-30e-5p	Adnp	11538	ENSMUSG00000051149	Sequencing	19536157
mirtarbase	mmu-miR-30e-5p	Gm20459	11641	ENSMUSG00000089945	Sequencing	19536157
mirtarbase	mmu-miR-30e-5p	Akap2	11641	ENSMUSG00000038729	Sequencing	19536157
mirtarbase	mmu-miR-30e-5p	Apc	11789	ENSMUSG00000005871	Sequencing	19536157
mirtarbase	mmu-miR-30e-5p	Araf	11836	ENSMUSG00000001127	Sequencing	19536157
mirtarbase	mmu-miR-30e-5p	Zfhx3	11906	ENSMUSG00000038872	Sequencing	19536157
mirtarbase	mmu-miR-30e-5p	Atp2a2	11938	ENSMUSG00000029467	Sequencing	19536157
mirtarbase	mmu-miR-30e-5p	Slc7a1	11987	ENSMUSG00000041313	Sequencing	19536157
mirtarbase	mmu-miR-30e-5p	Bach1	12013	ENSMUSG00000025612	Sequencing	19536157
mirtarbase	mmu-miR-30e-5p	Bcl7c	12055	ENSMUSG00000030814	Sequencing	19536157
mirtarbase	mmu-miR-30e-5p	Prdm1	12142	ENSMUSG00000038151	Sequencing	19536157
mirtarbase	mmu-miR-30e-5p	Zfp36l1	12192	ENSMUSG00000021127	Sequencing	19536157
mirtarbase	mmu-miR-30e-5p	Capn7	12339	ENSMUSG00000021893	Sequencing	19536157
mirtarbase	mmu-miR-30e-5p	Ccne2	12448	ENSMUSG00000028212	Sequencing	19536157
mirtarbase	mmu-miR-30e-5p	Col9a3	12841	ENSMUSG00000027570	Sequencing	19536157
mirtarbase	mmu-miR-30e-5p	Cox4i1	12857	ENSMUSG00000031818	Sequencing	19536157
mirtarbase	mmu-miR-30e-5p	Cpox	12892	ENSMUSG00000022742	Sequencing	19536157
mirtarbase	mmu-miR-30e-5p	Cry2	12953	ENSMUSG00000068742	Sequencing	19536157
mirtarbase	mmu-miR-30e-5p	Csnk2a1	12995	ENSMUSG00000074698	Sequencing	19536157
mirtarbase	mmu-miR-30e-5p	Dag1	13138	ENSMUSG00000039952	Sequencing	19536157
mirtarbase	mmu-miR-30e-5p	Dio2	13371	ENSMUSG00000007682	Sequencing	19536157
mirtarbase	mmu-miR-30e-5p	Eif4g2	13690	ENSMUSG00000005610	Sequencing	19536157
mirtarbase	mmu-miR-30e-5p	Enc1	13803	ENSMUSG00000041773	Sequencing	19536157
mirtarbase	mmu-miR-30e-5p	Eno2	13807	ENSMUSG00000004267	Sequencing	19536157
mirtarbase	mmu-miR-30e-5p	Epb4.1l1	13821	ENSMUSG00000027624	Sequencing	19536157
mirtarbase	mmu-miR-30e-5p	Epha4	13838	ENSMUSG00000026235	Sequencing	19536157
mirtarbase	mmu-miR-30e-5p	Celf2	14007	ENSMUSG00000002107	Sequencing	19536157
mirtarbase	mmu-miR-30e-5p	Fem1b	14155	ENSMUSG00000032244	Sequencing	19536157
mirtarbase	mmu-miR-30e-5p	Gabrb2	14401	ENSMUSG00000007653	Sequencing	19536157
mirtarbase	mmu-miR-30e-5p	Gnai2	14678	ENSMUSG00000032562	Sequencing	19536157
mirtarbase	mmu-miR-30e-5p	Gnao1	14681	ENSMUSG00000031748	Sequencing	19536157
mirtarbase	mmu-miR-30e-5p	Gnpat	14712	ENSMUSG00000031985	Sequencing	19536157
mirtarbase	mmu-miR-30e-5p	Gpm6b	14758	ENSMUSG00000031342	Sequencing	19536157
mirtarbase	mmu-miR-30e-5p	Lancl1	14768	ENSMUSG00000026000	Sequencing	19536157
mirtarbase	mmu-miR-30e-5p	Grk4	14772	ENSMUSG00000052783	Sequencing	19536157
mirtarbase	mmu-miR-30e-5p	Grk5	14773	ENSMUSG00000003228	Sequencing	19536157
mirtarbase	mmu-miR-30e-5p	Grb10	14783	ENSMUSG00000020176	Sequencing	19536157
mirtarbase	mmu-miR-30e-5p	Gria2	14800	ENSMUSG00000033981	Sequencing	19536157
mirtarbase	mmu-miR-30e-5p	Nr3c1	14815	ENSMUSG00000024431	Sequencing	19536157
mirtarbase	mmu-miR-30e-5p	Trip12	14897	ENSMUSG00000026219	Sequencing	19536157
mirtarbase	mmu-miR-30e-5p	Hells	15201	ENSMUSG00000025001	Sequencing	19536157
mirtarbase	mmu-miR-30e-5p	Herc2	15204	ENSMUSG00000030451	Sequencing	19536157
mirtarbase	mmu-miR-30e-5p	Hipk1	15257	ENSMUSG00000008730	Sequencing	19536157
mirtarbase	mmu-miR-30e-5p	Ide	15925	ENSMUSG00000056999	Sequencing	19536157
mirtarbase	mmu-miR-30e-5p	Ifngr1	15979	ENSMUSG00000020009	Sequencing	19536157
mirtarbase	mmu-miR-30e-5p	Igf1r	16001	ENSMUSG00000005533	Sequencing	19536157
mirtarbase	mmu-miR-30e-5p	Itpa	16434	ENSMUSG00000074797	Sequencing	19536157
mirtarbase	mmu-miR-30e-5p	Kcnj6	16522	ENSMUSG00000043301	Sequencing	19536157
mirtarbase	mmu-miR-30e-5p	Kif21a	16564	ENSMUSG00000022629	Sequencing	19536157
mirtarbase	mmu-miR-30e-5p	Kif5b	16573	ENSMUSG00000006740	Sequencing	19536157
mirtarbase	mmu-miR-30e-5p	Kif5c	16574	ENSMUSG00000026764	Sequencing	19536157
mirtarbase	mmu-miR-30e-5p	Klf2	16598	ENSMUSG00000055148	Sequencing	19536157
mirtarbase	mmu-miR-30e-5p	Kpna3	16648	ENSMUSG00000021929	Sequencing	19536157
mirtarbase	mmu-miR-30e-5p	Lhx1	16869	ENSMUSG00000018698	Sequencing	19536157
mirtarbase	mmu-miR-30e-5p	Lig3	16882	ENSMUSG00000020697	Sequencing	19536157
mirtarbase	mmu-miR-30e-5p	Lrp8	16975	ENSMUSG00000028613	Sequencing	19536157
mirtarbase	mmu-miR-30e-5p	Mcf2l	17207	ENSMUSG00000031442	Sequencing	19536157
mirtarbase	mmu-miR-30e-5p	Mcl1	17210	ENSMUSG00000038612	Sequencing	19536157
mirtarbase	mmu-miR-30e-5p	Mecp2	17257	ENSMUSG00000031393	Sequencing	19536157
mirtarbase	mmu-miR-30e-5p	Mt1	17748	ENSMUSG00000031765	Sequencing	19536157
mirtarbase	mmu-miR-30e-5p	Mtf1	17764	ENSMUSG00000028890	Sequencing	19536157
mirtarbase	mmu-miR-30e-5p	Myh9	17886	ENSMUSG00000022443	Sequencing	19536157
mirtarbase	mmu-miR-30e-5p	Ncam1	17967	ENSMUSG00000039542	Sequencing	19536157
mirtarbase	mmu-miR-30e-5p	Nfatc3	18021	ENSMUSG00000031902	Sequencing	19536157
mirtarbase	mmu-miR-30e-5p	Nfib	18028	ENSMUSG00000008575	Sequencing	19536157
mirtarbase	mmu-miR-30e-5p	Nid1	18073	ENSMUSG00000005397	Sequencing	19536157
mirtarbase	mmu-miR-30e-5p	Mycn	18109	ENSMUSG00000037169	Sequencing	19536157
mirtarbase	mmu-miR-30e-5p	Nras	18176	ENSMUSG00000027852	Sequencing	19536157
mirtarbase	mmu-miR-30e-5p	Nsd1	18193	ENSMUSG00000021488	Sequencing	19536157
mirtarbase	mmu-miR-30e-5p	Nsg1	18196	ENSMUSG00000029126	Sequencing	19536157
mirtarbase	mmu-miR-30e-5p	Omg	18377	ENSMUSG00000049612	Sequencing	19536157
mirtarbase	mmu-miR-30e-5p	Oprl1	18389	ENSMUSG00000027584	Sequencing	19536157
mirtarbase	mmu-miR-30e-5p	Osmr	18414	ENSMUSG00000022146	Sequencing	19536157
mirtarbase	mmu-miR-30e-5p	P4ha2	18452	ENSMUSG00000018906	Sequencing	19536157
mirtarbase	mmu-miR-30e-5p	Pafah1b2	18475	ENSMUSG00000003131	Sequencing	19536157
mirtarbase	mmu-miR-30e-5p	Pde7a	18583	ENSMUSG00000069094	Sequencing	19536157
mirtarbase	mmu-miR-30e-5p	Peg3	18616	ENSMUSG00000002265	Sequencing	19536157
mirtarbase	mmu-miR-30e-5p	Pfn2	18645	ENSMUSG00000027805	Sequencing	19536157
mirtarbase	mmu-miR-30e-5p	Pitpna	18738	ENSMUSG00000017781	Sequencing	19536157
mirtarbase	mmu-miR-30e-5p	Plxna2	18845	ENSMUSG00000026640	Sequencing	19536157
mirtarbase	mmu-miR-30e-5p	Pnn	18949	ENSMUSG00000020994	Sequencing	19536157
mirtarbase	mmu-miR-30e-5p	Ppp3ca	19055	ENSMUSG00000028161	Sequencing	19536157
mirtarbase	mmu-miR-30e-5p	Ppp3r1	19058	ENSMUSG00000033953	Sequencing	19536157
mirtarbase	mmu-miR-30e-5p	Ptgfrn	19221	ENSMUSG00000027864	Sequencing	19536157
mirtarbase	mmu-miR-30e-5p	Ptp4a2	19244	ENSMUSG00000028788	Sequencing	19536157
mirtarbase	mmu-miR-30e-5p	Ptprd	19266	ENSMUSG00000028399	Sequencing	19536157
mirtarbase	mmu-miR-30e-5p	Ptprz1	19283	ENSMUSG00000068748	Sequencing	19536157
mirtarbase	mmu-miR-30e-5p	Qk	19317	ENSMUSG00000062078	Sequencing	19536157
mirtarbase	mmu-miR-30e-5p	Pitpnm2	19679	ENSMUSG00000029406	Sequencing	19536157
mirtarbase	mmu-miR-30e-5p	Rev3l	19714	ENSMUSG00000019841	Sequencing	19536157
mirtarbase	mmu-miR-30e-5p	Xpr1	19775	ENSMUSG00000026469	Sequencing	19536157
mirtarbase	mmu-miR-30e-5p	Scn1a	20265	ENSMUSG00000064329	Sequencing	19536157
mirtarbase	mmu-miR-30e-5p	Scn8a	20273	ENSMUSG00000023033	Sequencing	19536157
mirtarbase	mmu-miR-30e-5p	Sema6a	20358	ENSMUSG00000019647	Sequencing	19536157
mirtarbase	mmu-miR-30e-5p	Shmt1	20425	ENSMUSG00000020534	Sequencing	19536157
mirtarbase	mmu-miR-30e-5p	St8sia4	20452	ENSMUSG00000040710	Sequencing	19536157
mirtarbase	mmu-miR-30e-5p	Ski	20481	ENSMUSG00000029050	Sequencing	19536157
mirtarbase	mmu-miR-30e-5p	Slc25a14	20523	ENSMUSG00000031105	Sequencing	19536157
mirtarbase	mmu-miR-30e-5p	Slc7a5	20539	ENSMUSG00000040010	Sequencing	19536157
mirtarbase	mmu-miR-30e-5p	Sox4	20677	ENSMUSG00000076431	Sequencing	19536157
mirtarbase	mmu-miR-30e-5p	Slc6a6	21366	ENSMUSG00000030096	Sequencing	19536157
mirtarbase	mmu-miR-30e-5p	Skp1a	21402	ENSMUSG00000036309	Sequencing	19536157
mirtarbase	mmu-miR-30e-5p	Tcf7	21414	ENSMUSG00000000782	Sequencing	19536157
mirtarbase	mmu-miR-30e-5p	Tspan7	21912	ENSMUSG00000058254	Sequencing	19536157
mirtarbase	mmu-miR-30e-5p	Nr2c1	22025	ENSMUSG00000005897	Sequencing	19536157
mirtarbase	mmu-miR-30e-5p	Tspyl1	22110	ENSMUSG00000047514	Sequencing	19536157
mirtarbase	mmu-miR-30e-5p	Ucp2	22228	ENSMUSG00000033685	Luciferase reporter assay//qRT-PCR//Western blot	23515048
mirtarbase	mmu-miR-30e-5p	Unc5c	22253	ENSMUSG00000059921	Sequencing	19536157
mirtarbase	mmu-miR-30e-5p	Ywhag	22628	ENSMUSG00000051391	Sequencing	19536157
mirtarbase	mmu-miR-30e-5p	Zfp9	22750	ENSMUSG00000072623	Sequencing	19536157
mirtarbase	mmu-miR-30e-5p	Slc30a4	22785	ENSMUSG00000005802	Sequencing	19536157
mirtarbase	mmu-miR-30e-5p	Akt3	23797	ENSMUSG00000019699	Sequencing	19536157
mirtarbase	mmu-miR-30e-5p	Nek4	23955	ENSMUSG00000021918	Sequencing	19536157
mirtarbase	mmu-miR-30e-5p	Tenm3	23965	ENSMUSG00000031561	Sequencing	19536157
mirtarbase	mmu-miR-30e-5p	Map3k1	26401	ENSMUSG00000021754	Sequencing	19536157
mirtarbase	mmu-miR-30e-5p	Map3k5	26408	ENSMUSG00000071369	Sequencing	19536157
mirtarbase	mmu-miR-30e-5p	Homer2	26557	ENSMUSG00000025813	Sequencing	19536157
mirtarbase	mmu-miR-30e-5p	Slc7a11	26570	ENSMUSG00000027737	Sequencing	19536157
mirtarbase	mmu-miR-30e-5p	Cars	27267	ENSMUSG00000010755	Sequencing	19536157
mirtarbase	mmu-miR-30e-5p	Ept1	28042	ENSMUSG00000075703	Sequencing	19536157
mirtarbase	mmu-miR-30e-5p	Rabgap1l	29809	ENSMUSG00000026721	Sequencing	19536157
mirtarbase	mmu-miR-30e-5p	Magi2	50791	ENSMUSG00000040003	Sequencing	19536157
mirtarbase	mmu-miR-30e-5p	Spast	50850	ENSMUSG00000024068	Sequencing	19536157
mirtarbase	mmu-miR-30e-5p	Rnf24	51902	ENSMUSG00000048911	Sequencing	19536157
mirtarbase	mmu-miR-30e-5p	Usp2	53376	ENSMUSG00000032010	Sequencing	19536157
mirtarbase	mmu-miR-30e-5p	Cd164	53599	ENSMUSG00000019818	Sequencing	19536157
mirtarbase	mmu-miR-30e-5p	Blcap	53619	ENSMUSG00000067787	Sequencing	19536157
mirtarbase	mmu-miR-30e-5p	Arl6ip1	54208	ENSMUSG00000030654	Sequencing	19536157
mirtarbase	mmu-miR-30e-5p	Azin1	54375	ENSMUSG00000037458	Sequencing	19536157
mirtarbase	mmu-miR-30e-5p	Nfat5	54446	ENSMUSG00000003847	Sequencing	19536157
mirtarbase	mmu-miR-30e-5p	Sfmbt1	54650	ENSMUSG00000006527	Sequencing	19536157
mirtarbase	mmu-miR-30e-5p	Atp8b2	54667	ENSMUSG00000060671	Sequencing	19536157
mirtarbase	mmu-miR-30e-5p	Becn1	56208	ENSMUSG00000035086	Sequencing	19536157
mirtarbase	mmu-miR-30e-5p	B4galt5	56336	ENSMUSG00000017929	Sequencing	19536157
mirtarbase	mmu-miR-30e-5p	B4galt6	56386	ENSMUSG00000056124	Sequencing	19536157
mirtarbase	mmu-miR-30e-5p	Adar	56417	ENSMUSG00000027951	Sequencing	19536157
mirtarbase	mmu-miR-30e-5p	Ybx3	56449	ENSMUSG00000030189	Sequencing	19536157
mirtarbase	mmu-miR-30e-5p	Pnkd	56695	ENSMUSG00000026179	Sequencing	19536157
mirtarbase	mmu-miR-30e-5p	Alg2	56737	ENSMUSG00000039740	Sequencing	19536157
mirtarbase	mmu-miR-30e-5p	Mbnl1	56758	ENSMUSG00000027763	Sequencing	19536157
mirtarbase	mmu-miR-30e-5p	Sec61a2	57743	ENSMUSG00000025816	Sequencing	19536157
mirtarbase	mmu-miR-30e-5p	Pmaip1	58801	ENSMUSG00000024521	Sequencing	19536157
mirtarbase	mmu-miR-30e-5p	Sh3rf1	59009	ENSMUSG00000031642	Sequencing	19536157
mirtarbase	mmu-miR-30e-5p	Arpp19	59046	ENSMUSG00000007656	Sequencing	19536157
mirtarbase	mmu-miR-30e-5p	Trp53inp1	60599	ENSMUSG00000028211	Sequencing	19536157
mirtarbase	mmu-miR-30e-5p	Yeats4	64050	ENSMUSG00000020171	Sequencing	19536157
mirtarbase	mmu-miR-30e-5p	Sv2b	64176	ENSMUSG00000053025	Sequencing	19536157
mirtarbase	mmu-miR-30e-5p	Rtn4r	65079	ENSMUSG00000043811	Sequencing	19536157
mirtarbase	mmu-miR-30e-5p	Twsg1	65960	ENSMUSG00000024098	Sequencing	19536157
mirtarbase	mmu-miR-30e-5p	Atp6v1g2	66237	ENSMUSG00000024403	Sequencing	19536157
mirtarbase	mmu-miR-30e-5p	Camk2n1	66259	ENSMUSG00000046447	Sequencing	19536157
mirtarbase	mmu-miR-30e-5p	Cyb5b	66427	ENSMUSG00000031924	Sequencing	19536157
mirtarbase	mmu-miR-30e-5p	Lrrc57	66606	ENSMUSG00000027286	Sequencing	19536157
mirtarbase	mmu-miR-30e-5p	Lix1	66643	ENSMUSG00000047786	Sequencing	19536157
mirtarbase	mmu-miR-30e-5p	Gid4	66771	ENSMUSG00000018415	Sequencing	19536157
mirtarbase	mmu-miR-30e-5p	Riok3	66878	ENSMUSG00000024404	Sequencing	19536157
mirtarbase	mmu-miR-30e-5p	Ddx17	67040	ENSMUSG00000055065	Sequencing	19536157
mirtarbase	mmu-miR-30e-5p	Cdc37l1	67072	ENSMUSG00000024780	Sequencing	19536157
mirtarbase	mmu-miR-30e-5p	Mtdh	67154	ENSMUSG00000022255	Sequencing	19536157
mirtarbase	mmu-miR-30e-5p	Peli1	67245	ENSMUSG00000020134	Sequencing	19536157
mirtarbase	mmu-miR-30e-5p	Ppfibp1	67533	ENSMUSG00000016487	Sequencing	19536157
mirtarbase	mmu-miR-30e-5p	Cpeb4	67579	ENSMUSG00000020300	Sequencing	19536157
mirtarbase	mmu-miR-30e-5p	Samd8	67630	ENSMUSG00000021770	Sequencing	19536157
mirtarbase	mmu-miR-30e-5p	Rgs8	67792	ENSMUSG00000042671	Sequencing	19536157
mirtarbase	mmu-miR-30e-5p	Nacc2	67991	ENSMUSG00000026932	Sequencing	19536157
mirtarbase	mmu-miR-30e-5p	Sdccag3	68112	ENSMUSG00000026927	Sequencing	19536157
mirtarbase	mmu-miR-30e-5p	Zdhhc21	68268	ENSMUSG00000028403	Sequencing	19536157
mirtarbase	mmu-miR-30e-5p	Rmnd5a	68477	ENSMUSG00000002222	Sequencing	19536157
mirtarbase	mmu-miR-30e-5p	Trim37	68729	ENSMUSG00000018548	Sequencing	19536157
mirtarbase	mmu-miR-30e-5p	1190002N15Rik	68861	ENSMUSG00000045414	Sequencing	19536157
mirtarbase	mmu-miR-30e-5p	Vps26b	69091	ENSMUSG00000031988	Sequencing	19536157
mirtarbase	mmu-miR-30e-5p	Necab1	69352	ENSMUSG00000040536	Sequencing	19536157
mirtarbase	mmu-miR-30e-5p	Antxr1	69538	ENSMUSG00000033420	Sequencing	19536157
mirtarbase	mmu-miR-30e-5p	Klhdc2	69554	ENSMUSG00000020978	Sequencing	19536157
mirtarbase	mmu-miR-30e-5p	Afap1	70292	ENSMUSG00000029094	Sequencing	19536157
mirtarbase	mmu-miR-30e-5p	Gpr125	70693	ENSMUSG00000029090	Sequencing	19536157
mirtarbase	mmu-miR-30e-5p	Tspan2	70747	ENSMUSG00000027858	Sequencing	19536157
mirtarbase	mmu-miR-30e-5p	Spag9	70834	ENSMUSG00000020859	Sequencing	19536157
mirtarbase	mmu-miR-30e-5p	Pgm2l1	70974	ENSMUSG00000030729	Sequencing	19536157
mirtarbase	mmu-miR-30e-5p	Scara5	71145	ENSMUSG00000022032	Sequencing	19536157
mirtarbase	mmu-miR-30e-5p	Dlg5	71228	ENSMUSG00000021782	Sequencing	19536157
mirtarbase	mmu-miR-30e-5p	Slc29a3	71279	ENSMUSG00000020100	Sequencing	19536157
mirtarbase	mmu-miR-30e-5p	Arid5b	71371	ENSMUSG00000019947	Sequencing	19536157
mirtarbase	mmu-miR-30e-5p	Coasy	71743	ENSMUSG00000001755	Sequencing	19536157
mirtarbase	mmu-miR-30e-5p	Pitpnc1	71795	ENSMUSG00000040430	Sequencing	19536157
mirtarbase	mmu-miR-30e-5p	Fndc3b	72007	ENSMUSG00000039286	Sequencing	19536157
mirtarbase	mmu-miR-30e-5p	Cotl1	72042	ENSMUSG00000031827	Sequencing	19536157
mirtarbase	mmu-miR-30e-5p	Amer1	72345	ENSMUSG00000050332	Sequencing	19536157
mirtarbase	mmu-miR-30e-5p	Hsdl2	72479	ENSMUSG00000028383	Sequencing	19536157
mirtarbase	mmu-miR-30e-5p	Pgam5	72542	ENSMUSG00000029500	Sequencing	19536157
mirtarbase	mmu-miR-30e-5p	Zfp655	72611	ENSMUSG00000007812	Sequencing	19536157
mirtarbase	mmu-miR-30e-5p	Zkscan3	72739	ENSMUSG00000021327	Sequencing	19536157
mirtarbase	mmu-miR-30e-5p	Fam117b	72750	ENSMUSG00000041040	Sequencing	19536157
mirtarbase	mmu-miR-30e-5p	Setd5	72895	ENSMUSG00000034269	Sequencing	19536157
mirtarbase	mmu-miR-30e-5p	Insig2	72999	ENSMUSG00000003721	Sequencing	19536157
mirtarbase	mmu-miR-30e-5p	Rps6ka5	73086	ENSMUSG00000021180	Sequencing	19536157
mirtarbase	mmu-miR-30e-5p	Wasl	73178	ENSMUSG00000029684	Sequencing	19536157
mirtarbase	mmu-miR-30e-5p	Cep350	74081	ENSMUSG00000033671	Sequencing	19536157
mirtarbase	mmu-miR-30e-5p	Slc35a5	74102	ENSMUSG00000022664	Sequencing	19536157
mirtarbase	mmu-miR-30e-5p	Gpcpd1	74182	ENSMUSG00000027346	Sequencing	19536157
mirtarbase	mmu-miR-30e-5p	Phactr3	74189	ENSMUSG00000027525	Sequencing	19536157
mirtarbase	mmu-miR-30e-5p	Samd4	74480	ENSMUSG00000021838	Sequencing	19536157
mirtarbase	mmu-miR-30e-5p	Neto2	74513	ENSMUSG00000036902	Sequencing	19536157
mirtarbase	mmu-miR-30e-5p	Ddit4	74747	ENSMUSG00000020108	Sequencing	19536157
mirtarbase	mmu-miR-30e-5p	Zdhhc20	75965	ENSMUSG00000021969	Sequencing	19536157
mirtarbase	mmu-miR-30e-5p	Zmym2	76007	ENSMUSG00000021945	Sequencing	19536157
mirtarbase	mmu-miR-30e-5p	Jakmip2	76217	ENSMUSG00000024502	Sequencing	19536157
mirtarbase	mmu-miR-30e-5p	Snx27	76742	ENSMUSG00000028136	Sequencing	19536157
mirtarbase	mmu-miR-30e-5p	Snip1	76793	ENSMUSG00000050213	Sequencing	19536157
mirtarbase	mmu-miR-30e-5p	Fam49a	76820	ENSMUSG00000020589	Sequencing	19536157
mirtarbase	mmu-miR-30e-5p	Gper1	76854	ENSMUSG00000053647	Sequencing	19536157
mirtarbase	mmu-miR-30e-5p	Wdr82	77305	ENSMUSG00000020257	Sequencing	19536157
mirtarbase	mmu-miR-30e-5p	Myh10	77579	ENSMUSG00000020900	Sequencing	19536157
mirtarbase	mmu-miR-30e-5p	Usp45	77593	ENSMUSG00000040455	Sequencing	19536157
mirtarbase	mmu-miR-30e-5p	Cdk19	78334	ENSMUSG00000038481	Sequencing	19536157
mirtarbase	mmu-miR-30e-5p	Helz	78455	ENSMUSG00000020721	Sequencing	19536157
mirtarbase	mmu-miR-30e-5p	Acap2	78618	ENSMUSG00000049076	Sequencing	19536157
mirtarbase	mmu-miR-30e-5p	Avl9	78937	ENSMUSG00000029787	Sequencing	19536157
mirtarbase	mmu-miR-30e-5p	Trim44	80985	ENSMUSG00000027189	Sequencing	19536157
mirtarbase	mmu-miR-30e-5p	Gpr63	81006	ENSMUSG00000040372	Sequencing	19536157
mirtarbase	mmu-miR-30e-5p	Ankrd17	81702	ENSMUSG00000055204	Sequencing	19536157
mirtarbase	mmu-miR-30e-5p	Cacng7	81904	ENSMUSG00000069806	Sequencing	19536157
mirtarbase	mmu-miR-30e-5p	Cacng7	81904	ENSMUSG00000096998	Sequencing	19536157
mirtarbase	mmu-miR-30e-5p	Pde4dip	83679	ENSMUSG00000038170	Sequencing	19536157
mirtarbase	mmu-miR-30e-5p	Glce	93683	ENSMUSG00000032252	Sequencing	19536157
mirtarbase	mmu-miR-30e-5p	Pcdhga11	93723	ENSMUSG00000023036	Sequencing	19536157
mirtarbase	mmu-miR-30e-5p	Pcdhga12	93723	ENSMUSG00000023036	Sequencing	19536157
mirtarbase	mmu-miR-30e-5p	Pcdhga3	93723	ENSMUSG00000023036	Sequencing	19536157
mirtarbase	mmu-miR-30e-5p	Pcdhga8	93723	ENSMUSG00000023036	Sequencing	19536157
mirtarbase	mmu-miR-30e-5p	Pcdhga9	93723	ENSMUSG00000023036	Sequencing	19536157
mirtarbase	mmu-miR-30e-5p	Pcdhgc3	93723	ENSMUSG00000023036	Sequencing	19536157
mirtarbase	mmu-miR-30e-5p	Pcdhgc4	93723	ENSMUSG00000023036	Sequencing	19536157
mirtarbase	mmu-miR-30e-5p	Pcdhgc5	93723	ENSMUSG00000023036	Sequencing	19536157
mirtarbase	mmu-miR-30e-5p	Pcdhgb6	93723	ENSMUSG00000023036	Sequencing	19536157
mirtarbase	mmu-miR-30e-5p	Aff4	93736	ENSMUSG00000049470	Sequencing	19536157
mirtarbase	mmu-miR-30e-5p	Arid1a	93760	ENSMUSG00000007880	Sequencing	19536157
mirtarbase	mmu-miR-30e-5p	Nipa2	93790	ENSMUSG00000030452	Sequencing	19536157
mirtarbase	mmu-miR-30e-5p	Pcdhb22	93893	ENSMUSG00000073591	Sequencing	19536157
mirtarbase	mmu-miR-30e-5p	Arid4b	94246	ENSMUSG00000039219	Sequencing	19536157
mirtarbase	mmu-miR-30e-5p	Smap1	98366	ENSMUSG00000026155	Sequencing	19536157
mirtarbase	mmu-miR-30e-5p	Qser1	99003	ENSMUSG00000074994	Sequencing	19536157
mirtarbase	mmu-miR-30e-5p	Arfip1	99889	ENSMUSG00000074513	Sequencing	19536157
mirtarbase	mmu-miR-30e-5p	Plekha1	101476	ENSMUSG00000040268	Sequencing	19536157
mirtarbase	mmu-miR-30e-5p	Slc6a15	103098	ENSMUSG00000019894	Sequencing	19536157
mirtarbase	mmu-miR-30e-5p	Slain1	105439	ENSMUSG00000055717	Sequencing	19536157
mirtarbase	mmu-miR-30e-5p	Pdzd8	107368	ENSMUSG00000074746	Sequencing	19536157
mirtarbase	mmu-miR-30e-5p	Wwp1	107568	ENSMUSG00000041058	Sequencing	19536157
mirtarbase	mmu-miR-30e-5p	Ap1s2	108012	ENSMUSG00000031367	Sequencing	19536157
mirtarbase	mmu-miR-30e-5p	Camk2d	108058	ENSMUSG00000053819	Sequencing	19536157
mirtarbase	mmu-miR-30e-5p	Grm5	108071	ENSMUSG00000049583	Sequencing	19536157
mirtarbase	mmu-miR-30e-5p	Galnt7	108150	ENSMUSG00000031608	Sequencing	19536157
mirtarbase	mmu-miR-30e-5p	Gpt2	108682	ENSMUSG00000031700	Sequencing	19536157
mirtarbase	mmu-miR-30e-5p	Pttg1ip	108705	ENSMUSG00000009291	Sequencing	19536157
mirtarbase	mmu-miR-30e-5p	Nabp1	109019	ENSMUSG00000026107	Sequencing	19536157
mirtarbase	mmu-miR-30e-5p	Sobp	109205	ENSMUSG00000038248	Sequencing	19536157
mirtarbase	mmu-miR-30e-5p	Adarb1	110532	ENSMUSG00000020262	Sequencing	19536157
mirtarbase	mmu-miR-30e-5p	Rps6ka3	110651	ENSMUSG00000031309	Sequencing	19536157
mirtarbase	mmu-miR-30e-5p	Ppp2r4	110854	ENSMUSG00000039515	Sequencing	19536157
mirtarbase	mmu-miR-30e-5p	Scn2a1	110876	ENSMUSG00000075318	Sequencing	19536157
mirtarbase	mmu-miR-30e-5p	Egln2	112406	ENSMUSG00000058709	Sequencing	19536157
mirtarbase	mmu-miR-30e-5p	Acap3	140500	ENSMUSG00000029033	Sequencing	19536157
mirtarbase	mmu-miR-30e-5p	Snx18	170625	ENSMUSG00000042364	Sequencing	19536157
mirtarbase	mmu-miR-30e-5p	Znrf1	170737	ENSMUSG00000033545	Sequencing	19536157
mirtarbase	mmu-miR-30e-5p	Ppargc1b	170826	ENSMUSG00000033871	Sequencing	19536157
mirtarbase	mmu-miR-30e-5p	Nlgn1	192167	ENSMUSG00000063887	Sequencing	19536157
mirtarbase	mmu-miR-30e-5p	Igsf11	207683	ENSMUSG00000022790	Sequencing	19536157
mirtarbase	mmu-miR-30e-5p	Setd1b	208043	ENSMUSG00000038384	Sequencing	19536157
mirtarbase	mmu-miR-30e-5p	Hmgcll1	208982	ENSMUSG00000007908	Sequencing	19536157
mirtarbase	mmu-miR-30e-5p	Tmc7	209760	ENSMUSG00000042246	Sequencing	19536157
mirtarbase	mmu-miR-30e-5p	Pank3	211347	ENSMUSG00000018846	Sequencing	19536157
mirtarbase	mmu-miR-30e-5p	Zfp950	214368		Sequencing	19536157
mirtarbase	mmu-miR-30e-5p	Csnk1g1	214897	ENSMUSG00000032384	Sequencing	19536157
mirtarbase	mmu-miR-30e-5p	Sema6d	214968	ENSMUSG00000027200	Sequencing	19536157
mirtarbase	mmu-miR-30e-5p	Vezt	215008	ENSMUSG00000036099	Sequencing	19536157
mirtarbase	mmu-miR-30e-5p	Prr14l	215476	ENSMUSG00000054280	Sequencing	19536157
mirtarbase	mmu-miR-30e-5p	Tcp11l2	216198	ENSMUSG00000020034	Sequencing	19536157
mirtarbase	mmu-miR-30e-5p	Ehbp1	216565	ENSMUSG00000042302	Sequencing	19536157
mirtarbase	mmu-miR-30e-5p	Papolg	216578	ENSMUSG00000020273	Sequencing	19536157
mirtarbase	mmu-miR-30e-5p	Fnip1	216742	ENSMUSG00000035992	Sequencing	19536157
mirtarbase	mmu-miR-30e-5p	Rnf157	217340	ENSMUSG00000052949	Sequencing	19536157
mirtarbase	mmu-miR-30e-5p	Tnrc6c	217351	ENSMUSG00000025571	Sequencing	19536157
mirtarbase	mmu-miR-30e-5p	Stxbp6	217517	ENSMUSG00000046314	Sequencing	19536157
mirtarbase	mmu-miR-30e-5p	Lhfpl2	218454	ENSMUSG00000045312	Sequencing	19536157
mirtarbase	mmu-miR-30e-5p	Sgtb	218544	ENSMUSG00000042743	Sequencing	19536157
mirtarbase	mmu-miR-30e-5p	Mier3	218613	ENSMUSG00000032727	Sequencing	19536157
mirtarbase	mmu-miR-30e-5p	Arl15	218639	ENSMUSG00000042348	Sequencing	19536157
mirtarbase	mmu-miR-30e-5p	Khnyn	219094	ENSMUSG00000047153	Sequencing	19536157
mirtarbase	mmu-miR-30e-5p	Mtmr6	219135	ENSMUSG00000021987	Sequencing	19536157
mirtarbase	mmu-miR-30e-5p	Pcdh17	219228	ENSMUSG00000035566	Sequencing	19536157
mirtarbase	mmu-miR-30e-5p	Dap	223453	ENSMUSG00000039168	Sequencing	19536157
mirtarbase	mmu-miR-30e-5p	Fam49b	223601	ENSMUSG00000022378	Sequencing	19536157
mirtarbase	mmu-miR-30e-5p	Fam43a	224093	ENSMUSG00000046546	Sequencing	19536157
mirtarbase	mmu-miR-30e-5p	Srsf7	225027	ENSMUSG00000024097	Sequencing	19536157
mirtarbase	mmu-miR-30e-5p	Pggt1b	225467	ENSMUSG00000024477	Sequencing	19536157
mirtarbase	mmu-miR-30e-5p	Lpgat1	226856	ENSMUSG00000026623	Sequencing	19536157
mirtarbase	mmu-miR-30e-5p	Slc39a10	227059	ENSMUSG00000025986	Sequencing	19536157
mirtarbase	mmu-miR-30e-5p	Gigyf2	227331	ENSMUSG00000048000	Sequencing	19536157
mirtarbase	mmu-miR-30e-5p	C1ql3	227580	ENSMUSG00000049630	Sequencing	19536157
mirtarbase	mmu-miR-30e-5p	4930402H24Rik	228602	ENSMUSG00000027309	Sequencing	19536157
mirtarbase	mmu-miR-30e-5p	Btbd3	228662	ENSMUSG00000062098	Sequencing	19536157
mirtarbase	mmu-miR-30e-5p	Ythdf3	229096	ENSMUSG00000047213	Sequencing	19536157
mirtarbase	mmu-miR-30e-5p	Strip1	229707	ENSMUSG00000014601	Sequencing	19536157
mirtarbase	mmu-miR-30e-5p	D3Bwg0562e	229791	ENSMUSG00000044667	Sequencing	19536157
mirtarbase	mmu-miR-30e-5p	Ythdc1	231386	ENSMUSG00000035851	Sequencing	19536157
mirtarbase	mmu-miR-30e-5p	Fam109a	231717	ENSMUSG00000044134	Sequencing	19536157
mirtarbase	mmu-miR-30e-5p	Daglb	231871	ENSMUSG00000039206	Sequencing	19536157
mirtarbase	mmu-miR-30e-5p	Vopp1	232023	ENSMUSG00000037788	Sequencing	19536157
mirtarbase	mmu-miR-30e-5p	Rsf1	233532	ENSMUSG00000035623	Sequencing	19536157
mirtarbase	mmu-miR-30e-5p	Arglu1	234023	ENSMUSG00000040459	Sequencing	19536157
mirtarbase	mmu-miR-30e-5p	Whsc1l1	234135	ENSMUSG00000054823	Sequencing	19536157
mirtarbase	mmu-miR-30e-5p	Gpm6a	234267	ENSMUSG00000031517	Sequencing	19536157
mirtarbase	mmu-miR-30e-5p	Med17	234959	ENSMUSG00000031935	Sequencing	19536157
mirtarbase	mmu-miR-30e-5p	Slc36a4	234967	ENSMUSG00000043885	Sequencing	19536157
mirtarbase	mmu-miR-30e-5p	Ankrd52	237615	ENSMUSG00000014498	Sequencing	19536157
mirtarbase	mmu-miR-30e-5p	Zbtb34	241311	ENSMUSG00000068966	Sequencing	19536157
mirtarbase	mmu-miR-30e-5p	Lrrc55	241528	ENSMUSG00000075224	Sequencing	19536157
mirtarbase	mmu-miR-30e-5p	Ppm1l	242083	ENSMUSG00000027784	Sequencing	19536157
mirtarbase	mmu-miR-30e-5p	Tmem245	242474	ENSMUSG00000055296	Sequencing	19536157
mirtarbase	mmu-miR-30e-5p	Palm2	242481	ENSMUSG00000090053	Sequencing	19536157
mirtarbase	mmu-miR-30e-5p	Dlgap2	244310	ENSMUSG00000047495	Sequencing	19536157
mirtarbase	mmu-miR-30e-5p	Neto1	246317	ENSMUSG00000050321	Sequencing	19536157
mirtarbase	mmu-miR-30e-5p	Kcnc2	268345	ENSMUSG00000035681	Sequencing	19536157
mirtarbase	mmu-miR-30e-5p	Abat	268860	ENSMUSG00000057880	Sequencing	19536157
mirtarbase	mmu-miR-30e-5p	Lsamp	268890	ENSMUSG00000061080	Sequencing	19536157
mirtarbase	mmu-miR-30e-5p	Robo2	268902	ENSMUSG00000052516	Sequencing	19536157
mirtarbase	mmu-miR-30e-5p	Epb4.1	269587	ENSMUSG00000028906	Sequencing	19536157
mirtarbase	mmu-miR-30e-5p	Fam155a	270028	ENSMUSG00000079157	Sequencing	19536157
mirtarbase	mmu-miR-30e-5p	Slc35e1	270066	ENSMUSG00000019731	Sequencing	19536157
mirtarbase	mmu-miR-30e-5p	Vat1l	270097	ENSMUSG00000046844	Sequencing	19536157
mirtarbase	mmu-miR-30e-5p	Celf5	319586	ENSMUSG00000034818	Sequencing	19536157
mirtarbase	mmu-miR-30e-5p	Rc3h2	319817	ENSMUSG00000075376	Sequencing	19536157
mirtarbase	mmu-miR-30e-5p	Jph4	319984	ENSMUSG00000022208	Sequencing	19536157
mirtarbase	mmu-miR-30e-5p	Zbtb39	320080	ENSMUSG00000044617	Sequencing	19536157
mirtarbase	mmu-miR-30e-5p	C130071C03Rik	320203		Sequencing	19536157
mirtarbase	mmu-miR-30e-5p	Ipcef1	320495	ENSMUSG00000064065	Sequencing	19536157
mirtarbase	mmu-miR-30e-5p	Chd7	320790	ENSMUSG00000041235	Sequencing	19536157
mirtarbase	mmu-miR-30e-5p	Zhx3	320799	ENSMUSG00000035877	Sequencing	19536157
mirtarbase	mmu-miR-30e-5p	8430427H17Rik	329540	ENSMUSG00000061411	Sequencing	19536157
mirtarbase	mmu-miR-30e-5p	Fnip2	329679	ENSMUSG00000061175	Sequencing	19536157
mirtarbase	mmu-miR-30e-5p	Pigk	329777	ENSMUSG00000039047	Sequencing	19536157
mirtarbase	mmu-miR-30e-5p	Adamts3	330119	ENSMUSG00000043635	Sequencing	19536157
mirtarbase	mmu-miR-30e-5p	Lemd3	380664	ENSMUSG00000048661	Sequencing	19536157
mirtarbase	mmu-miR-30e-5p	Ccnjl	380694	ENSMUSG00000044707	Sequencing	19536157
mirtarbase	mmu-miR-30e-5p	Zfp174	385674	ENSMUSG00000054939	Sequencing	19536157
mirtarbase	mmu-miR-30e-5p	Baz2b	407823	ENSMUSG00000026987	Sequencing	19536157
mirtarbase	mmu-miR-30e-5p	Gja6	414089	ENSMUSG00000055691	Sequencing	19536157
mirtarbase	mmu-miR-30e-5p	Bdp1	544971	ENSMUSG00000049658	Sequencing	19536157
mirtarbase	mmu-miR-30e-5p	Tnik	665113	ENSMUSG00000027692	Sequencing	19536157
mirtarbase	mmu-miR-30e-5p	Frmpd1	666060	ENSMUSG00000035615	Sequencing	19536157
mirtarbase	mmu-miR-30e-5p	Gm20459	677884		Sequencing	19536157
mirtarbase	mmu-miR-30e-5p	Dnajc3	100037258	ENSMUSG00000022136	Sequencing	19536157
mirtarbase	mmu-miR-30e-5p	Nhsl2	100042480	ENSMUSG00000079481	Sequencing	19536157
mirtarbase	mmu-miR-30e-5p	AK010878	100233175	ENSMUSG00000091931	Sequencing	19536157
tarbase	mmu-miR-30e-5p	100039744		ENSMUSG00000005397	Sequencing
tarbase	mmu-miR-30e-5p	1190002N15Rik	68861	ENSMUSG00000045414	Sequencing
tarbase	mmu-miR-30e-5p	2010109K11Rik		ENSMUSG00000078373	Sequencing
tarbase	mmu-miR-30e-5p	4930402H24Rik	228602	ENSMUSG00000027309	Sequencing
tarbase	mmu-miR-30e-5p	4933439F18Rik		ENSMUSG00000018415	Sequencing
tarbase	mmu-miR-30e-5p	6030436E02Rik		ENSMUSG00000054280	Sequencing
tarbase	mmu-miR-30e-5p	8430427H17Rik	329540	ENSMUSG00000061411	Sequencing
tarbase	mmu-miR-30e-5p	9130227C08Rik		ENSMUSG00000047153	Sequencing
tarbase	mmu-miR-30e-5p	A130090K04Rik		ENSMUSG00000064065	Sequencing
tarbase	mmu-miR-30e-5p	Abat	268860	ENSMUSG00000057880	Sequencing
tarbase	mmu-miR-30e-5p	AC121268.7		ENSMUSG00000027692	Sequencing
tarbase	mmu-miR-30e-5p	Acap2	78618	ENSMUSG00000049076	Sequencing
tarbase	mmu-miR-30e-5p	Acap3	140500	ENSMUSG00000029033	Sequencing
tarbase	mmu-miR-30e-5p	Acp2	11432	ENSMUSG00000002103	Sequencing
tarbase	mmu-miR-30e-5p	Adam22	11496	ENSMUSG00000040537	Sequencing
tarbase	mmu-miR-30e-5p	Adam9	11502	ENSMUSG00000031555	Sequencing
tarbase	mmu-miR-30e-5p	Adamts3	330119	ENSMUSG00000043635	Sequencing
tarbase	mmu-miR-30e-5p	Adar	56417	ENSMUSG00000027951	Sequencing
tarbase	mmu-miR-30e-5p	Adarb1	110532	ENSMUSG00000020262	Sequencing
tarbase	mmu-miR-30e-5p	Adnp	11538	ENSMUSG00000051149	Sequencing
tarbase	mmu-miR-30e-5p	Afap1	70292	ENSMUSG00000029094	Sequencing
tarbase	mmu-miR-30e-5p	Aff4	93736	ENSMUSG00000049470	Sequencing
tarbase	mmu-miR-30e-5p	Akt3	23797	ENSMUSG00000019699	Sequencing
tarbase	mmu-miR-30e-5p	Alg2	56737	ENSMUSG00000039740	Sequencing
tarbase	mmu-miR-30e-5p	Ankrd17	81702	ENSMUSG00000055204	Sequencing
tarbase	mmu-miR-30e-5p	Ankrd52	237615	ENSMUSG00000014498	Sequencing
tarbase	mmu-miR-30e-5p	Antxr1	69538	ENSMUSG00000033420	Sequencing
tarbase	mmu-miR-30e-5p	Ap1s2	108012	ENSMUSG00000031367	Sequencing
tarbase	mmu-miR-30e-5p	Apc	11789	ENSMUSG00000005871	Sequencing
tarbase	mmu-miR-30e-5p	Araf	11836	ENSMUSG00000001127	Sequencing
tarbase	mmu-miR-30e-5p	Arfip1	99889	ENSMUSG00000074513	Sequencing
tarbase	mmu-miR-30e-5p	Arglu1	234023	ENSMUSG00000040459	Sequencing
tarbase	mmu-miR-30e-5p	Arid1a	93760	ENSMUSG00000007880	Sequencing
tarbase	mmu-miR-30e-5p	Arid4b	94246	ENSMUSG00000039219	Sequencing
tarbase	mmu-miR-30e-5p	Arid5b	71371	ENSMUSG00000019947	Sequencing
tarbase	mmu-miR-30e-5p	Arl15	218639	ENSMUSG00000042348	Sequencing
tarbase	mmu-miR-30e-5p	Arl6ip1	54208	ENSMUSG00000030654	Sequencing
tarbase	mmu-miR-30e-5p	Arpp19	59046	ENSMUSG00000007656	Sequencing
tarbase	mmu-miR-30e-5p	Atp2a2	11938	ENSMUSG00000029467	Sequencing
tarbase	mmu-miR-30e-5p	Atp6v1g2	66237	ENSMUSG00000024403	Sequencing
tarbase	mmu-miR-30e-5p	Atp8b2	54667	ENSMUSG00000060671	Sequencing
tarbase	mmu-miR-30e-5p	Avl9	78937	ENSMUSG00000029787	Sequencing
tarbase	mmu-miR-30e-5p	AW121567		ENSMUSG00000079157	Sequencing
tarbase	mmu-miR-30e-5p	AW146242		ENSMUSG00000037788	Sequencing
tarbase	mmu-miR-30e-5p	Azin1	54375	ENSMUSG00000037458	Sequencing
tarbase	mmu-miR-30e-5p	B4galt5	56336	ENSMUSG00000017929	Sequencing
tarbase	mmu-miR-30e-5p	B4galt6	56386	ENSMUSG00000056124	Sequencing
tarbase	mmu-miR-30e-5p	Bach1	12013	ENSMUSG00000025612	Sequencing
tarbase	mmu-miR-30e-5p	Baz2b	407823	ENSMUSG00000026987	Sequencing
tarbase	mmu-miR-30e-5p	BC037112		ENSMUSG00000037210	Sequencing
tarbase	mmu-miR-30e-5p	Bcl7c	12055	ENSMUSG00000030814	Sequencing
tarbase	mmu-miR-30e-5p	Bdp1	544971	ENSMUSG00000049658	Sequencing
tarbase	mmu-miR-30e-5p	Becn1	56208	ENSMUSG00000035086	Sequencing
tarbase	mmu-miR-30e-5p	Blcap	53619	ENSMUSG00000067787	Sequencing
tarbase	mmu-miR-30e-5p	Brunol5		ENSMUSG00000034818	Sequencing
tarbase	mmu-miR-30e-5p	Btbd3	228662	ENSMUSG00000062098	Sequencing
tarbase	mmu-miR-30e-5p	C130071C03Rik		ENSMUSG00000050334	Sequencing
tarbase	mmu-miR-30e-5p	C1ql3	227580	ENSMUSG00000049630	Sequencing
tarbase	mmu-miR-30e-5p	Cacng7	81904	ENSMUSG00000069806	Sequencing
tarbase	mmu-miR-30e-5p	Camk2d	108058	ENSMUSG00000053819	Sequencing
tarbase	mmu-miR-30e-5p	Camk2n1	66259	ENSMUSG00000046447	Sequencing
tarbase	mmu-miR-30e-5p	Capn7	12339	ENSMUSG00000021893	Sequencing
tarbase	mmu-miR-30e-5p	Cars	27267	ENSMUSG00000010755	Sequencing
tarbase	mmu-miR-30e-5p	Ccne2	12448	ENSMUSG00000028212	Sequencing
tarbase	mmu-miR-30e-5p	Ccnjl	380694	ENSMUSG00000044707	Sequencing
tarbase	mmu-miR-30e-5p	Cd164	53599	ENSMUSG00000019818	Sequencing
tarbase	mmu-miR-30e-5p	Cdc2l6		ENSMUSG00000038481	Sequencing
tarbase	mmu-miR-30e-5p	Cdc37l1	67072	ENSMUSG00000024780	Sequencing
tarbase	mmu-miR-30e-5p	Cep350	74081	ENSMUSG00000033671	Sequencing
tarbase	mmu-miR-30e-5p	Chd7	320790	ENSMUSG00000041235	Sequencing
tarbase	mmu-miR-30e-5p	Coasy	71743	ENSMUSG00000001755	Sequencing
tarbase	mmu-miR-30e-5p	Col9a3	12841	ENSMUSG00000027570	Sequencing
tarbase	mmu-miR-30e-5p	Cotl1	72042	ENSMUSG00000031827	Sequencing
tarbase	mmu-miR-30e-5p	Cox4i1	12857	ENSMUSG00000031818	Sequencing
tarbase	mmu-miR-30e-5p	Cpeb4	67579	ENSMUSG00000020300	Sequencing
tarbase	mmu-miR-30e-5p	Cpox	12892	ENSMUSG00000022742	Sequencing
tarbase	mmu-miR-30e-5p	Cry2	12953	ENSMUSG00000068742	Sequencing
tarbase	mmu-miR-30e-5p	Csda		ENSMUSG00000030189	Sequencing
tarbase	mmu-miR-30e-5p	Csnk1g1	214897	ENSMUSG00000032384	Sequencing
tarbase	mmu-miR-30e-5p	Csnk2a1	12995	ENSMUSG00000074698	Sequencing
tarbase	mmu-miR-30e-5p	Cugbp2		ENSMUSG00000002107	Sequencing
tarbase	mmu-miR-30e-5p	Cyb5b	66427	ENSMUSG00000031924	Sequencing
tarbase	mmu-miR-30e-5p	Cyb5b	100047577	ENSMUSG00000031924	Sequencing
tarbase	mmu-miR-30e-5p	D12Ertd553e		ENSMUSG00000020589	Sequencing
tarbase	mmu-miR-30e-5p	D3Bwg0562e	229791	ENSMUSG00000044667	Sequencing
tarbase	mmu-miR-30e-5p	D5Wsu178e		ENSMUSG00000075703	Sequencing
tarbase	mmu-miR-30e-5p	D730040F13Rik		ENSMUSG00000055296	Sequencing
tarbase	mmu-miR-30e-5p	Dag1	13138	ENSMUSG00000039952	Sequencing
tarbase	mmu-miR-30e-5p	Daglb	231871	ENSMUSG00000039206	Sequencing
tarbase	mmu-miR-30e-5p	Dap	223453	ENSMUSG00000039168	Sequencing
tarbase	mmu-miR-30e-5p	Ddit4	74747	ENSMUSG00000020108	Sequencing
tarbase	mmu-miR-30e-5p	Ddx17	67040	ENSMUSG00000055065	Sequencing
tarbase	mmu-miR-30e-5p	Dio2		ENSMUSG00000007682	Sequencing
tarbase	mmu-miR-30e-5p	Dlg5	71228	ENSMUSG00000021782	Sequencing
tarbase	mmu-miR-30e-5p	Dlgap2	244310	ENSMUSG00000047495	Sequencing
tarbase	mmu-miR-30e-5p	Dnajc3	100037258	ENSMUSG00000022136	Sequencing
tarbase	mmu-miR-30e-5p	Egln2	112406	ENSMUSG00000058709	Sequencing
tarbase	mmu-miR-30e-5p	Ehbp1	216565	ENSMUSG00000042302	Sequencing
tarbase	mmu-miR-30e-5p	Eif4g2	13690	ENSMUSG00000005610	Sequencing
tarbase	mmu-miR-30e-5p	Enc1	13803	ENSMUSG00000041773	Sequencing
tarbase	mmu-miR-30e-5p	Eno2	13807	ENSMUSG00000004267	Sequencing
tarbase	mmu-miR-30e-5p	Epb4.1	269587	ENSMUSG00000028906	Sequencing
tarbase	mmu-miR-30e-5p	Epb4.1l1	13821	ENSMUSG00000027624	Sequencing
tarbase	mmu-miR-30e-5p	Epha4	13838	ENSMUSG00000026235	Sequencing
tarbase	mmu-miR-30e-5p	Fam109a	231717	ENSMUSG00000044134	Sequencing
tarbase	mmu-miR-30e-5p	Fam117b	72750	ENSMUSG00000041040	Sequencing
tarbase	mmu-miR-30e-5p	Fam123b		ENSMUSG00000050332	Sequencing
tarbase	mmu-miR-30e-5p	Fam40a		ENSMUSG00000014601	Sequencing
tarbase	mmu-miR-30e-5p	Fam43a	224093	ENSMUSG00000046546	Sequencing
tarbase	mmu-miR-30e-5p	Fam49b	223601	ENSMUSG00000022378	Sequencing
tarbase	mmu-miR-30e-5p	Fem1b	14155	ENSMUSG00000032244	Sequencing
tarbase	mmu-miR-30e-5p	Fndc3b	72007	ENSMUSG00000039286	Sequencing
tarbase	mmu-miR-30e-5p	Fnip1	216742	ENSMUSG00000035992	Sequencing
tarbase	mmu-miR-30e-5p	Fnip2	329679	ENSMUSG00000061175	Sequencing
tarbase	mmu-miR-30e-5p	Frmpd1	666060	ENSMUSG00000035615	Sequencing
tarbase	mmu-miR-30e-5p	Gabrb2	14401	ENSMUSG00000007653	Sequencing
tarbase	mmu-miR-30e-5p	Galnt7	108150	ENSMUSG00000031608	Sequencing
tarbase	mmu-miR-30e-5p	Gigyf2	227331	ENSMUSG00000048000	Sequencing
tarbase	mmu-miR-30e-5p	Gja6	414089	ENSMUSG00000055691	Sequencing
tarbase	mmu-miR-30e-5p	Glce	93683	ENSMUSG00000032252	Sequencing
tarbase	mmu-miR-30e-5p	Gnai2	14678	ENSMUSG00000032562	Sequencing
tarbase	mmu-miR-30e-5p	Gnao1	14681	ENSMUSG00000031748	Sequencing
tarbase	mmu-miR-30e-5p	Gnpat	14712	ENSMUSG00000031985	Sequencing
tarbase	mmu-miR-30e-5p	Gper		ENSMUSG00000053647	Sequencing
tarbase	mmu-miR-30e-5p	Gpm6a	234267	ENSMUSG00000031517	Sequencing
tarbase	mmu-miR-30e-5p	Gpm6b	14758	ENSMUSG00000031342	Sequencing
tarbase	mmu-miR-30e-5p	Gpr125	70693	ENSMUSG00000029090	Sequencing
tarbase	mmu-miR-30e-5p	Gpr63	81006	ENSMUSG00000040372	Sequencing
tarbase	mmu-miR-30e-5p	Gpt2	108682	ENSMUSG00000031700	Sequencing
tarbase	mmu-miR-30e-5p	Grb10	14783	ENSMUSG00000020176	Sequencing
tarbase	mmu-miR-30e-5p	Gria2	14800	ENSMUSG00000033981	Sequencing
tarbase	mmu-miR-30e-5p	Grk4	14772	ENSMUSG00000052783	Sequencing
tarbase	mmu-miR-30e-5p	Grk5	14773	ENSMUSG00000003228	Sequencing
tarbase	mmu-miR-30e-5p	Grm5	108071	ENSMUSG00000049583	Sequencing
tarbase	mmu-miR-30e-5p	Hells	15201	ENSMUSG00000025001	Sequencing
tarbase	mmu-miR-30e-5p	Helz	78455	ENSMUSG00000020721	Sequencing
tarbase	mmu-miR-30e-5p	Herc2	15204	ENSMUSG00000030451	Sequencing
tarbase	mmu-miR-30e-5p	Hipk1	15257	ENSMUSG00000008730	Sequencing
tarbase	mmu-miR-30e-5p	Hmgcll1	208982	ENSMUSG00000007908	Sequencing
tarbase	mmu-miR-30e-5p	Homer2	26557	ENSMUSG00000025813	Sequencing
tarbase	mmu-miR-30e-5p	Hsdl2	72479	ENSMUSG00000028383	Sequencing
tarbase	mmu-miR-30e-5p	Ide	15925	ENSMUSG00000056999	Sequencing
tarbase	mmu-miR-30e-5p	Ifngr1	15979	ENSMUSG00000020009	Sequencing
tarbase	mmu-miR-30e-5p	Igf1r	16001	ENSMUSG00000005533	Sequencing
tarbase	mmu-miR-30e-5p	Igsf11	207683	ENSMUSG00000022790	Sequencing
tarbase	mmu-miR-30e-5p	Insig2	72999	ENSMUSG00000003721	Sequencing
tarbase	mmu-miR-30e-5p	Itpa	16434	ENSMUSG00000074797	Sequencing
tarbase	mmu-miR-30e-5p	Jakmip2	76217	ENSMUSG00000024502	Sequencing
tarbase	mmu-miR-30e-5p	Jph4	319984	ENSMUSG00000022208	Sequencing
tarbase	mmu-miR-30e-5p	Kcnc2	268345	ENSMUSG00000035681	Sequencing
tarbase	mmu-miR-30e-5p	Kcnj6	16522	ENSMUSG00000043301	Sequencing
tarbase	mmu-miR-30e-5p	Kif21a	16564	ENSMUSG00000022629	Sequencing
tarbase	mmu-miR-30e-5p	Kif5b	16573	ENSMUSG00000006740	Sequencing
tarbase	mmu-miR-30e-5p	Kif5c	16574	ENSMUSG00000026764	Sequencing
tarbase	mmu-miR-30e-5p	Klf2	16598	ENSMUSG00000055148	Sequencing
tarbase	mmu-miR-30e-5p	Klhdc2	69554	ENSMUSG00000020978	Sequencing
tarbase	mmu-miR-30e-5p	Kpna3	16648	ENSMUSG00000021929	Sequencing
tarbase	mmu-miR-30e-5p	Lancl1	14768	ENSMUSG00000026000	Sequencing
tarbase	mmu-miR-30e-5p	Lemd3	380664	ENSMUSG00000048661	Sequencing
tarbase	mmu-miR-30e-5p	Lhfpl2	218454	ENSMUSG00000045312	Sequencing
tarbase	mmu-miR-30e-5p	Lhx1	16869	ENSMUSG00000018698	Sequencing
tarbase	mmu-miR-30e-5p	Lig3	16882	ENSMUSG00000020697	Sequencing
tarbase	mmu-miR-30e-5p	Lix1	66643	ENSMUSG00000047786	Sequencing
tarbase	mmu-miR-30e-5p	Lpgat1	226856	ENSMUSG00000026623	Sequencing
tarbase	mmu-miR-30e-5p	Lrp8	16975	ENSMUSG00000028613	Sequencing
tarbase	mmu-miR-30e-5p	Lrrc55	241528	ENSMUSG00000075224	Sequencing
tarbase	mmu-miR-30e-5p	Lrrc57	66606	ENSMUSG00000027286	Sequencing
tarbase	mmu-miR-30e-5p	Lsamp	268890	ENSMUSG00000061080	Sequencing
tarbase	mmu-miR-30e-5p	Magi2	50791	ENSMUSG00000040003	Sequencing
tarbase	mmu-miR-30e-5p	Magi2		ENSMUSG00000067798	Sequencing
tarbase	mmu-miR-30e-5p	Magi2		ENSMUSG00000073174	Sequencing
tarbase	mmu-miR-30e-5p	Map3k1	26401	ENSMUSG00000021754	Sequencing
tarbase	mmu-miR-30e-5p	Map3k5	26408	ENSMUSG00000071369	Sequencing
tarbase	mmu-miR-30e-5p	Mbnl1	56758	ENSMUSG00000027763	Sequencing
tarbase	mmu-miR-30e-5p	Mcf2l	17207	ENSMUSG00000031442	Sequencing
tarbase	mmu-miR-30e-5p	Mcl1	17210	ENSMUSG00000038612	Sequencing
tarbase	mmu-miR-30e-5p	Mecp2	17257	ENSMUSG00000031393	Sequencing
tarbase	mmu-miR-30e-5p	Med17	234959	ENSMUSG00000031935	Sequencing
tarbase	mmu-miR-30e-5p	Mier3	218613	ENSMUSG00000032727	Sequencing
tarbase	mmu-miR-30e-5p	Moap1	64113	ENSMUSG00000096458	Sequencing
tarbase	mmu-miR-30e-5p	Mt1	17748	ENSMUSG00000031765	Sequencing
tarbase	mmu-miR-30e-5p	Mtdh	67154	ENSMUSG00000022255	Sequencing
tarbase	mmu-miR-30e-5p	Mtf1	17764	ENSMUSG00000028890	Sequencing
tarbase	mmu-miR-30e-5p	Mtmr6	219135	ENSMUSG00000021987	Sequencing
tarbase	mmu-miR-30e-5p	Mycn	18109	ENSMUSG00000037169	Sequencing
tarbase	mmu-miR-30e-5p	Myh10	77579	ENSMUSG00000020900	Sequencing
tarbase	mmu-miR-30e-5p	Myh9	17886	ENSMUSG00000022443	Sequencing
tarbase	mmu-miR-30e-5p	Nacc2	67991	ENSMUSG00000026932	Sequencing
tarbase	mmu-miR-30e-5p	Ncam1	17967	ENSMUSG00000039542	Sequencing
tarbase	mmu-miR-30e-5p	Necab1	69352	ENSMUSG00000040536	Sequencing
tarbase	mmu-miR-30e-5p	Nek4	23955	ENSMUSG00000021918	Sequencing
tarbase	mmu-miR-30e-5p	Neto1	246317	ENSMUSG00000050321	Sequencing
tarbase	mmu-miR-30e-5p	Neto2	74513	ENSMUSG00000036902	Sequencing
tarbase	mmu-miR-30e-5p	Nfat5	54446	ENSMUSG00000003847	Sequencing
tarbase	mmu-miR-30e-5p	Nfatc3	18021	ENSMUSG00000031902	Sequencing
tarbase	mmu-miR-30e-5p	Nfib	18028	ENSMUSG00000008575	Sequencing
tarbase	mmu-miR-30e-5p	Nhsl2	100042480	ENSMUSG00000079481	Sequencing
tarbase	mmu-miR-30e-5p	Nipa2	93790	ENSMUSG00000030452	Sequencing
tarbase	mmu-miR-30e-5p	Nlgn1	192167	ENSMUSG00000063887	Sequencing
tarbase	mmu-miR-30e-5p	Nr2c1	22025	ENSMUSG00000005897	Sequencing
tarbase	mmu-miR-30e-5p	Nr3c1	14815	ENSMUSG00000024431	Sequencing
tarbase	mmu-miR-30e-5p	Nras	18176	ENSMUSG00000027852	Sequencing
tarbase	mmu-miR-30e-5p	Nsd1	18193	ENSMUSG00000021488	Sequencing
tarbase	mmu-miR-30e-5p	Nsg1	18196	ENSMUSG00000029126	Sequencing
tarbase	mmu-miR-30e-5p	Obfc2a		ENSMUSG00000026107	Sequencing
tarbase	mmu-miR-30e-5p	Odz3		ENSMUSG00000031561	Sequencing
tarbase	mmu-miR-30e-5p	Omg	18377	ENSMUSG00000049612	Sequencing
tarbase	mmu-miR-30e-5p	Oprl1	18389	ENSMUSG00000027584	Sequencing
tarbase	mmu-miR-30e-5p	Osmr	18414	ENSMUSG00000022146	Sequencing
tarbase	mmu-miR-30e-5p	P4ha2	18452	ENSMUSG00000018906	Sequencing
tarbase	mmu-miR-30e-5p	Pafah1b2	18475	ENSMUSG00000003131	Sequencing
tarbase	mmu-miR-30e-5p	Palm2	242481	ENSMUSG00000090053	Sequencing
tarbase	mmu-miR-30e-5p	Pank3	211347	ENSMUSG00000018846	Sequencing
tarbase	mmu-miR-30e-5p	Papolg	216578	ENSMUSG00000020273	Sequencing
tarbase	mmu-miR-30e-5p	Pcdh17	219228	ENSMUSG00000035566	Sequencing
tarbase	mmu-miR-30e-5p	Pcdhb22	93893	ENSMUSG00000073591	Sequencing
tarbase	mmu-miR-30e-5p	Pcdhga2		ENSMUSG00000069394	Sequencing
tarbase	mmu-miR-30e-5p	Pcdhgb4		ENSMUSG00000023036	Sequencing
tarbase	mmu-miR-30e-5p	Pde4dip	83679	ENSMUSG00000038170	Sequencing
tarbase	mmu-miR-30e-5p	Pde7a	18583	ENSMUSG00000069094	Sequencing
tarbase	mmu-miR-30e-5p	Pdzd8	107368	ENSMUSG00000074746	Sequencing
tarbase	mmu-miR-30e-5p	Peg3	18616	ENSMUSG00000002265	Sequencing
tarbase	mmu-miR-30e-5p	Peli1	67245	ENSMUSG00000020134	Sequencing
tarbase	mmu-miR-30e-5p	Pfn2	18645	ENSMUSG00000027805	Sequencing
tarbase	mmu-miR-30e-5p	Pgam5	72542	ENSMUSG00000029500	Sequencing
tarbase	mmu-miR-30e-5p	Pggt1b	225467	ENSMUSG00000024477	Sequencing
tarbase	mmu-miR-30e-5p	Pgm2l1	70974	ENSMUSG00000030729	Sequencing
tarbase	mmu-miR-30e-5p	Phactr3	74189	ENSMUSG00000027525	Sequencing
tarbase	mmu-miR-30e-5p	Pigk	329777	ENSMUSG00000039047	Sequencing
tarbase	mmu-miR-30e-5p	Pitpna	18738	ENSMUSG00000017781	Sequencing
tarbase	mmu-miR-30e-5p	Pitpnc1	71795	ENSMUSG00000040430	Sequencing
tarbase	mmu-miR-30e-5p	Pitpnm2	19679	ENSMUSG00000029406	Sequencing
tarbase	mmu-miR-30e-5p	Plekha1	101476	ENSMUSG00000040268	Sequencing
tarbase	mmu-miR-30e-5p	Plxna2	18845	ENSMUSG00000026640	Sequencing
tarbase	mmu-miR-30e-5p	Pmaip1	58801	ENSMUSG00000024521	Sequencing
tarbase	mmu-miR-30e-5p	Pnkd	56695	ENSMUSG00000026179	Sequencing
tarbase	mmu-miR-30e-5p	Pnn	18949	ENSMUSG00000020994	Sequencing
tarbase	mmu-miR-30e-5p	Ppargc1b	170826	ENSMUSG00000033871	Sequencing
tarbase	mmu-miR-30e-5p	Ppfibp1	67533	ENSMUSG00000016487	Sequencing
tarbase	mmu-miR-30e-5p	Ppm1l	242083	ENSMUSG00000027784	Sequencing
tarbase	mmu-miR-30e-5p	Ppp2r4	110854	ENSMUSG00000039515	Sequencing
tarbase	mmu-miR-30e-5p	Ppp3ca	19055	ENSMUSG00000028161	Sequencing
tarbase	mmu-miR-30e-5p	Ppp3r1	19058	ENSMUSG00000033953	Sequencing
tarbase	mmu-miR-30e-5p	Prdm1	12142	ENSMUSG00000038151	Sequencing
tarbase	mmu-miR-30e-5p	Prei4		ENSMUSG00000027346	Sequencing
tarbase	mmu-miR-30e-5p	Ptgfrn	19221	ENSMUSG00000027864	Sequencing
tarbase	mmu-miR-30e-5p	Ptp4a2	19244	ENSMUSG00000028788	Sequencing
tarbase	mmu-miR-30e-5p	Ptprd	19266	ENSMUSG00000028399	Sequencing
tarbase	mmu-miR-30e-5p	Ptprz1	19283	ENSMUSG00000068748	Sequencing
tarbase	mmu-miR-30e-5p	Pttg1ip	108705	ENSMUSG00000009291	Sequencing
tarbase	mmu-miR-30e-5p	Purb	19291	ENSMUSG00000094483	Sequencing
tarbase	mmu-miR-30e-5p	Qk	19317	ENSMUSG00000062078	Sequencing
tarbase	mmu-miR-30e-5p	Qk	101055707	ENSMUSG00000044407	Sequencing
tarbase	mmu-miR-30e-5p	Qk	101056603	ENSMUSG00000044407	Sequencing
tarbase	mmu-miR-30e-5p	Qser1	99003	ENSMUSG00000074994	Sequencing
tarbase	mmu-miR-30e-5p	Rabgap1l	29809	ENSMUSG00000026721	Sequencing
tarbase	mmu-miR-30e-5p	Rc3h2	319817	ENSMUSG00000075376	Sequencing
tarbase	mmu-miR-30e-5p	Rev3l	19714	ENSMUSG00000019841	Sequencing
tarbase	mmu-miR-30e-5p	Rgs8	67792	ENSMUSG00000042671	Sequencing
tarbase	mmu-miR-30e-5p	Riok3	66878	ENSMUSG00000024404	Sequencing
tarbase	mmu-miR-30e-5p	Rmnd5a	68477	ENSMUSG00000002222	Sequencing
tarbase	mmu-miR-30e-5p	Rnf157	217340	ENSMUSG00000052949	Sequencing
tarbase	mmu-miR-30e-5p	Rnf24	51902	ENSMUSG00000048911	Sequencing
tarbase	mmu-miR-30e-5p	Robo2	268902	ENSMUSG00000052516	Sequencing
tarbase	mmu-miR-30e-5p	Rps6ka3	110651	ENSMUSG00000031309	Sequencing
tarbase	mmu-miR-30e-5p	Rps6ka5	73086	ENSMUSG00000021180	Sequencing
tarbase	mmu-miR-30e-5p	Rsf1	233532	ENSMUSG00000035623	Sequencing
tarbase	mmu-miR-30e-5p	Rtn4r	65079	ENSMUSG00000043811	Sequencing
tarbase	mmu-miR-30e-5p	Samd4	74480	ENSMUSG00000021838	Sequencing
tarbase	mmu-miR-30e-5p	Samd8	67630	ENSMUSG00000021770	Sequencing
tarbase	mmu-miR-30e-5p	Scara5	71145	ENSMUSG00000022032	Sequencing
tarbase	mmu-miR-30e-5p	Scn1a	20265	ENSMUSG00000064329	Sequencing
tarbase	mmu-miR-30e-5p	Scn2a1	110876	ENSMUSG00000075318	Sequencing
tarbase	mmu-miR-30e-5p	Scn8a	20273	ENSMUSG00000023033	Sequencing
tarbase	mmu-miR-30e-5p	Sdccag3	68112	ENSMUSG00000026927	Sequencing
tarbase	mmu-miR-30e-5p	Sec61a2	57743	ENSMUSG00000025816	Sequencing
tarbase	mmu-miR-30e-5p	Sema6a	20358	ENSMUSG00000019647	Sequencing
tarbase	mmu-miR-30e-5p	Sema6d	214968	ENSMUSG00000027200	Sequencing
tarbase	mmu-miR-30e-5p	Setd1b	208043	ENSMUSG00000038384	Sequencing
tarbase	mmu-miR-30e-5p	Setd5	72895	ENSMUSG00000034269	Sequencing
tarbase	mmu-miR-30e-5p	Sfmbt1	54650	ENSMUSG00000006527	Sequencing
tarbase	mmu-miR-30e-5p	Sfrs7		ENSMUSG00000024097	Sequencing
tarbase	mmu-miR-30e-5p	Sgtb	218544	ENSMUSG00000042743	Sequencing
tarbase	mmu-miR-30e-5p	Sh3rf1	59009	ENSMUSG00000031642	Sequencing
tarbase	mmu-miR-30e-5p	Shmt1	20425	ENSMUSG00000020534	Sequencing
tarbase	mmu-miR-30e-5p	Ski	20481	ENSMUSG00000029050	Sequencing
tarbase	mmu-miR-30e-5p	Skp1a	21402	ENSMUSG00000036309	Sequencing
tarbase	mmu-miR-30e-5p	Slain1	105439	ENSMUSG00000055717	Sequencing
tarbase	mmu-miR-30e-5p	Slc25a14	20523	ENSMUSG00000031105	Sequencing
tarbase	mmu-miR-30e-5p	Slc29a3	71279	ENSMUSG00000020100	Sequencing
tarbase	mmu-miR-30e-5p	Slc30a4	22785	ENSMUSG00000005802	Sequencing
tarbase	mmu-miR-30e-5p	Slc35a5	74102	ENSMUSG00000022664	Sequencing
tarbase	mmu-miR-30e-5p	Slc35e1	270066	ENSMUSG00000019731	Sequencing
tarbase	mmu-miR-30e-5p	Slc36a4	234967	ENSMUSG00000043885	Sequencing
tarbase	mmu-miR-30e-5p	Slc39a10	227059	ENSMUSG00000025986	Sequencing
tarbase	mmu-miR-30e-5p	Slc6a15	103098	ENSMUSG00000019894	Sequencing
tarbase	mmu-miR-30e-5p	Slc6a6	21366	ENSMUSG00000030096	Sequencing
tarbase	mmu-miR-30e-5p	Slc7a1	11987	ENSMUSG00000041313	Sequencing
tarbase	mmu-miR-30e-5p	Slc7a11	26570	ENSMUSG00000027737	Sequencing
tarbase	mmu-miR-30e-5p	Slc7a5	20539	ENSMUSG00000040010	Sequencing
tarbase	mmu-miR-30e-5p	Smap1	98366	ENSMUSG00000026155	Sequencing
tarbase	mmu-miR-30e-5p	Snip1	76793	ENSMUSG00000050213	Sequencing
tarbase	mmu-miR-30e-5p	Snx18	170625	ENSMUSG00000042364	Sequencing
tarbase	mmu-miR-30e-5p	Snx27	76742	ENSMUSG00000028136	Sequencing
tarbase	mmu-miR-30e-5p	Sobp	109205	ENSMUSG00000038248	Sequencing
tarbase	mmu-miR-30e-5p	Sox4	20677	ENSMUSG00000076431	Sequencing
tarbase	mmu-miR-30e-5p	Spag9	70834	ENSMUSG00000020859	Sequencing
tarbase	mmu-miR-30e-5p	Spast	50850	ENSMUSG00000024068	Sequencing
tarbase	mmu-miR-30e-5p	St8sia4	20452	ENSMUSG00000040710	Sequencing
tarbase	mmu-miR-30e-5p	Stxbp6	217517	ENSMUSG00000046314	Sequencing
tarbase	mmu-miR-30e-5p	Sv2b	64176	ENSMUSG00000053025	Sequencing
tarbase	mmu-miR-30e-5p	Tcf7	21414	ENSMUSG00000000782	Sequencing
tarbase	mmu-miR-30e-5p	Tcp11l2	216198	ENSMUSG00000020034	Sequencing
tarbase	mmu-miR-30e-5p	Tmc7	209760	ENSMUSG00000042246	Sequencing
tarbase	mmu-miR-30e-5p	Tnrc6c	217351	ENSMUSG00000025571	Sequencing
tarbase	mmu-miR-30e-5p	Trim37	68729	ENSMUSG00000018548	Sequencing
tarbase	mmu-miR-30e-5p	Trim44	80985	ENSMUSG00000027189	Sequencing
tarbase	mmu-miR-30e-5p	Trip12	14897	ENSMUSG00000026219	Sequencing
tarbase	mmu-miR-30e-5p	Trp53inp1	60599	ENSMUSG00000028211	Sequencing
tarbase	mmu-miR-30e-5p	Tspan2	70747	ENSMUSG00000027858	Sequencing
tarbase	mmu-miR-30e-5p	Tspan7	21912	ENSMUSG00000058254	Sequencing
tarbase	mmu-miR-30e-5p	Tspyl1	22110	ENSMUSG00000047514	Sequencing
tarbase	mmu-miR-30e-5p	Twsg1	65960	ENSMUSG00000024098	Sequencing
tarbase	mmu-miR-30e-5p	Unc5c	22253	ENSMUSG00000059921	Sequencing
tarbase	mmu-miR-30e-5p	Usp2	53376	ENSMUSG00000032010	Sequencing
tarbase	mmu-miR-30e-5p	Usp45	77593	ENSMUSG00000040455	Sequencing
tarbase	mmu-miR-30e-5p	Vat1l	270097	ENSMUSG00000046844	Sequencing
tarbase	mmu-miR-30e-5p	Vezt	215008	ENSMUSG00000036099	Sequencing
tarbase	mmu-miR-30e-5p	Vps26b	69091	ENSMUSG00000031988	Sequencing
tarbase	mmu-miR-30e-5p	Wasl	73178	ENSMUSG00000029684	Sequencing
tarbase	mmu-miR-30e-5p	Wdr82	77305	ENSMUSG00000020257	Sequencing
tarbase	mmu-miR-30e-5p	Whsc1l1	234135	ENSMUSG00000054823	Sequencing
tarbase	mmu-miR-30e-5p	Wwp1	107568	ENSMUSG00000041058	Sequencing
tarbase	mmu-miR-30e-5p	Xpr1	19775	ENSMUSG00000026469	Sequencing
tarbase	mmu-miR-30e-5p	Yeats4	64050	ENSMUSG00000020171	Sequencing
tarbase	mmu-miR-30e-5p	Ythdc1	231386	ENSMUSG00000035851	Sequencing
tarbase	mmu-miR-30e-5p	Ythdf3	229096	ENSMUSG00000047213	Sequencing
tarbase	mmu-miR-30e-5p	Ywhag	22628	ENSMUSG00000051391	Sequencing
tarbase	mmu-miR-30e-5p	Zbtb34	241311	ENSMUSG00000068966	Sequencing
tarbase	mmu-miR-30e-5p	Zbtb39	320080	ENSMUSG00000044617	Sequencing
tarbase	mmu-miR-30e-5p	Zdhhc20	75965	ENSMUSG00000021969	Sequencing
tarbase	mmu-miR-30e-5p	Zdhhc21	68268	ENSMUSG00000028403	Sequencing
tarbase	mmu-miR-30e-5p	Zfhx3	11906	ENSMUSG00000038872	Sequencing
tarbase	mmu-miR-30e-5p	Zfp174	385674	ENSMUSG00000054939	Sequencing
tarbase	mmu-miR-30e-5p	Zfp36l1	12192	ENSMUSG00000021127	Sequencing
tarbase	mmu-miR-30e-5p	Zfp655	72611	ENSMUSG00000007812	Sequencing
tarbase	mmu-miR-30e-5p	Zfp826		ENSMUSG00000074732	Sequencing
tarbase	mmu-miR-30e-5p	Zfp9	22750	ENSMUSG00000072623	Sequencing
tarbase	mmu-miR-30e-5p	Zhx3	320799	ENSMUSG00000035877	Sequencing
tarbase	mmu-miR-30e-5p	Zkscan3	72739	ENSMUSG00000021327	Sequencing
tarbase	mmu-miR-30e-5p	Zmym2	76007	ENSMUSG00000021945	Sequencing
tarbase	mmu-miR-30e-5p	Znrf1	170737	ENSMUSG00000033545	Sequencing

[truncated: 24 more sheets: mmu-miR-32-5p, mmu-miR-34a-5p, mmu-miR-34c-5p, mmu-miR-96-5p, mmu-miR-106b-5p, mmu-miR-125a-5p, mmu-miR-127-5p, mmu-miR-133a-5p, mmu-miR-134-5p, mmu-miR-139-5p, mmu-miR-145a-5p, mmu-miR-181a-5p, mmu-miR-185-5p, mmu-miR-190a-5p, mmu-miR-191-5p, mmu-miR-196a-5p, mmu-miR-199a-5p, mmu-miR-216a-5p, mmu-miR-218-5p, mmu-miR-219a-5p …]
